# Supplementary material for: The atmospheric chemistry box model CAABA/MECCA-3.0
Source: Copernicus journal article supplement (doi:10.5194/gmd-4-373-2011), 2011-05-06
Supplement: Supplementary file 7 [file gmd-4-373-2011-supplement.zip]

*C A A B A*

**M E C C A**
