# Supplementary material for: The atmospheric chemistry box model CAABA/MECCA-3.0
Source: Copernicus journal article supplement (doi:10.5194/gmd-4-373-2011), 2011-05-06
Supplement: Supplementary file 9 [file gmd-4-373-2011-supplement.zip]

Archive with 718 entries (677 files):
- caaba_3.0/
- caaba_3.0/main.mk
- caaba_3.0/messy_mecca_tag_parameters.inc
- caaba_3.0/montecarlo/
- caaba_3.0/montecarlo/mcexp_seed.txt
- caaba_3.0/montecarlo/montecarlo.tcsh
- caaba_3.0/messy_main_rnd_lux.f90
- caaba_3.0/messy_mecca_kpp_util.f90
- caaba_3.0/messy_mecca_tag_box.f90
- caaba_3.0/caaba_io_ascii.inc
- caaba_3.0/messy_main_blather.f90
- caaba_3.0/multirun/
- caaba_3.0/multirun/input/
- caaba_3.0/multirun/input/example_small.txt
- caaba_3.0/multirun/input/example_big.txt
- caaba_3.0/multirun/input/txt2nc.awk
- caaba_3.0/multirun/input/README
- caaba_3.0/multirun/input/xtxt2nc
- caaba_3.0/multirun/input/example_debug.txt
- caaba_3.0/multirun/multirun.tcsh
- caaba_3.0/ncv
- caaba_3.0/input/
- caaba_3.0/messy_mecca_kpp_global.f90
- caaba_3.0/messy_cmn_gasaq.f90
- caaba_3.0/messy_mecca_kpp_precision.f90
- caaba_3.0/CHANGELOG
- caaba_3.0/messy_traject_box.f90
- caaba_3.0/messy_main_tools.f90
- caaba_3.0/messy_mecca_kpp_function.f90
- caaba_3.0/messy_mecca_kpp_linearalgebra.f90
- caaba_3.0/depend.mk
- caaba_3.0/messy_main_rnd.f90
- caaba_3.0/messy_mecca.f90
- caaba_3.0/messy_mecca_kpp_parameters.f90
- caaba_3.0/jval.nml
- caaba_3.0/STATUS
- caaba_3.0/messy_readj_box.f90
- caaba_3.0/messy_mecca_box.f90
- caaba_3.0/cmg
- caaba_3.0/messy_mecca_kpp_jacobiansp.f90
- caaba_3.0/messy_main_tools_kp4_compress.f90
- caaba_3.0/messy_main_timer.f90
- caaba_3.0/messy_mecca_khet.f90
- caaba_3.0/_zipcaaba.tcsh
- caaba_3.0/messy_mecca_kpp_monitor.f90
- caaba_3.0/caaba_io_netcdf.inc
- caaba_3.0/messy_jval_jvpp.inc
- caaba_3.0/messy_main_control_cb.f90
- caaba_3.0/sfmakedepend
- caaba_3.0/messy_cmn_photol_mem.f90
- caaba_3.0/xcaaba
- caaba_3.0/traject/
- caaba_3.0/caaba_mem.f90
- caaba_3.0/messy_mecca_kpp_initialize.f90
- caaba_3.0/messy_mecca_kpp_jacobian.f90
- caaba_3.0/messy_jval.f90
- caaba_3.0/caaba.nml
- caaba_3.0/Makefile
- caaba_3.0/messy_mecca_dbl_box.f90
- caaba_3.0/messy_semidep_box.f90
- caaba_3.0/messy_mecca_dbl_parameters.inc
- caaba_3.0/caaba_io.f90
- caaba_3.0/mecca/
- caaba_3.0/mecca/gas.eqn
- caaba_3.0/mecca/graphviz/
- caaba_3.0/mecca/graphviz/eqn2dot.awk
- caaba_3.0/mecca/graphviz/xgraphviz
- caaba_3.0/mecca/graphviz/OH_HO2.dot
- caaba_3.0/mecca/graphviz/C4.pdf
- caaba_3.0/mecca/graphviz/Cl.pdf
- caaba_3.0/mecca/graphviz/all.spc
- caaba_3.0/mecca/graphviz/C1.dot
- caaba_3.0/mecca/graphviz/I.spc
- caaba_3.0/mecca/graphviz/C2.spc
- caaba_3.0/mecca/graphviz/OH_HO2.pdf
- caaba_3.0/mecca/graphviz/C5.dot
- caaba_3.0/mecca/graphviz/C5.spc
- caaba_3.0/mecca/graphviz/C3.spc
- caaba_3.0/mecca/graphviz/Br.pdf
- caaba_3.0/mecca/graphviz/Br.dot
- caaba_3.0/mecca/graphviz/.eqn.dot
- caaba_3.0/mecca/graphviz/I.dot
- caaba_3.0/mecca/graphviz/C.spc
- caaba_3.0/mecca/graphviz/spc_extract.awk
- caaba_3.0/mecca/graphviz/C1.spc
- caaba_3.0/mecca/graphviz/C1.pdf
- caaba_3.0/mecca/graphviz/Br.spc
- caaba_3.0/mecca/graphviz/C2.pdf
- caaba_3.0/mecca/graphviz/C4.spc
- caaba_3.0/mecca/graphviz/OH_HO2.spc
- caaba_3.0/mecca/graphviz/C4.dot
- caaba_3.0/mecca/graphviz/C3.dot
- caaba_3.0/mecca/graphviz/xgraphvizall
- caaba_3.0/mecca/graphviz/C3.pdf
- caaba_3.0/mecca/graphviz/Cl.spc
- caaba_3.0/mecca/graphviz/Cl.dot
- caaba_3.0/mecca/graphviz/C2.dot
- caaba_3.0/mecca/graphviz/C5.pdf
- caaba_3.0/mecca/graphviz/I.pdf
- caaba_3.0/mecca/check_conservation.pl
- caaba_3.0/mecca/mecca.spc
- caaba_3.0/mecca/aqueous.spc
- caaba_3.0/mecca/gas.spc
- caaba_3.0/mecca/tracdef.awk
- caaba_3.0/mecca/kpp/
- caaba_3.0/mecca/kpp/cflags.guess
- caaba_3.0/mecca/kpp/Makefile.defs.Darwin
- caaba_3.0/mecca/kpp/int/
- caaba_3.0/mecca/kpp/int/ros3_old.def
- caaba_3.0/mecca/kpp/int/rosenbrock.def
- caaba_3.0/mecca/kpp/int/sdirk.f
- caaba_3.0/mecca/kpp/int/kpp_sdirk4.f
- caaba_3.0/mecca/kpp/int/runge_kutta_tlm.def
- caaba_3.0/mecca/kpp/int/rosenbrock.f
- caaba_3.0/mecca/kpp/int/kpp_seulex.f90
- caaba_3.0/mecca/kpp/int/rosenbrock_adj.f90
- caaba_3.0/mecca/kpp/int/tau_leap.def
- caaba_3.0/mecca/kpp/int/ros2_manual.def
- caaba_3.0/mecca/kpp/int/atm_radau5.f
- caaba_3.0/mecca/kpp/int/atm_odessa_ddm.def
- caaba_3.0/mecca/kpp/int/runge_kutta_adj.def
- caaba_3.0/mecca/kpp/int/gillespie.def
- caaba_3.0/mecca/kpp/int/rosenbrock.c
- caaba_3.0/mecca/kpp/int/kpp_odessa_ddm.f
- caaba_3.0/mecca/kpp/int/rosenbrock.f90
- caaba_3.0/mecca/kpp/int/kpp_sdirk4.f90
- caaba_3.0/mecca/kpp/int/sdirk_adj.def
- caaba_3.0/mecca/kpp/int/kpp_sdirk4.def
- caaba_3.0/mecca/kpp/int/rosenbrock_mz.f90
- caaba_3.0/mecca/kpp/int/runge_kutta_adj.f90
- caaba_3.0/mecca/kpp/int/atm_lsodes.def
- caaba_3.0/mecca/kpp/int/runge_kutta.def
- caaba_3.0/mecca/kpp/int/gillespie.c
- caaba_3.0/mecca/kpp/int/sdirk_adj.f90
- caaba_3.0/mecca/kpp/int/kpp_lsode.def
- caaba_3.0/mecca/kpp/int/sdirk.f90
- caaba_3.0/mecca/kpp/int/kpp_lsode.f90
- caaba_3.0/mecca/kpp/int/atm_lsodes.f
- caaba_3.0/mecca/kpp/int/atm_radau5.def
- caaba_3.0/mecca/kpp/int/rosenbrock_adj.def
- caaba_3.0/mecca/kpp/int/rosenbrock_posdef.f90
- caaba_3.0/mecca/kpp/int/none.f
- caaba_3.0/mecca/kpp/int/none.f90
- caaba_3.0/mecca/kpp/int/runge_kutta.c
- caaba_3.0/mecca/kpp/int/kpp_radau5.f90
- caaba_3.0/mecca/kpp/int/atm_odessa_ddm.f
- caaba_3.0/mecca/kpp/int/none.m
- caaba_3.0/mecca/kpp/int/gillespie.f90
- caaba_3.0/mecca/kpp/int/sdirk_tlm.def
- caaba_3.0/mecca/kpp/int/sdirk.c
- caaba_3.0/mecca/kpp/int/sdirk_tlm.f90
- caaba_3.0/mecca/kpp/int/ros3_old.f90
- caaba_3.0/mecca/kpp/int/kpp_dvode.f
- caaba_3.0/mecca/kpp/int/runge_kutta_tlm.f90
- caaba_3.0/mecca/kpp/int/runge_kutta.f90
- caaba_3.0/mecca/kpp/int/oldies/
- caaba_3.0/mecca/kpp/int/oldies/exqssa.f
- caaba_3.0/mecca/kpp/int/oldies/ros1.f
- caaba_3.0/mecca/kpp/int/oldies/twostepj.def
- caaba_3.0/mecca/kpp/int/oldies/ros3.f
- caaba_3.0/mecca/kpp/int/oldies/kpp_ros4.f
- caaba_3.0/mecca/kpp/int/oldies/ros2.f90
- caaba_3.0/mecca/kpp/int/oldies/rodas3_ddm.f
- caaba_3.0/mecca/kpp/int/oldies/ros1.def
- caaba_3.0/mecca/kpp/int/oldies/qssa.f
- caaba_3.0/mecca/kpp/int/oldies/ros2.def
- caaba_3.0/mecca/kpp/int/oldies/ros3.c
- caaba_3.0/mecca/kpp/int/oldies/ros3_ddm.f
- caaba_3.0/mecca/kpp/int/oldies/ros4_ddm.f
- caaba_3.0/mecca/kpp/int/oldies/ros4.f
- caaba_3.0/mecca/kpp/int/oldies/kpp_rodas.f
- caaba_3.0/mecca/kpp/int/oldies/kpp_ros4.def
- caaba_3.0/mecca/kpp/int/oldies/exqssa.def
- caaba_3.0/mecca/kpp/int/oldies/ros3.def
- caaba_3.0/mecca/kpp/int/oldies/twostepj.f
- caaba_3.0/mecca/kpp/int/oldies/rodas3.f
- caaba_3.0/mecca/kpp/int/oldies/ros2.c
- caaba_3.0/mecca/kpp/int/oldies/ros4.def
- caaba_3.0/mecca/kpp/int/oldies/exqssa.c
- caaba_3.0/mecca/kpp/int/oldies/ros2.f
- caaba_3.0/mecca/kpp/int/oldies/ros1_ddm.def
- caaba_3.0/mecca/kpp/int/oldies/ros4_ddm.def
- caaba_3.0/mecca/kpp/int/oldies/rodas3.c
- caaba_3.0/mecca/kpp/int/oldies/kpp_rodas.def
- caaba_3.0/mecca/kpp/int/oldies/rodas3.def
- caaba_3.0/mecca/kpp/int/oldies/ros2_cts_adj.f
- caaba_3.0/mecca/kpp/int/oldies/ros1_ddm.f
- caaba_3.0/mecca/kpp/int/oldies/qssa.def
- caaba_3.0/mecca/kpp/int/oldies/ros2_ddm.def
- caaba_3.0/mecca/kpp/int/oldies/ros3_ddm.def
- caaba_3.0/mecca/kpp/int/oldies/qssafix.f
- caaba_3.0/mecca/kpp/int/oldies/ros2_ddm.f
- caaba_3.0/mecca/kpp/int/oldies/qssa1.f
- caaba_3.0/mecca/kpp/int/oldies/rodas3_ddm.def
- caaba_3.0/mecca/kpp/int/oldies/qssafix.def
- caaba_3.0/mecca/kpp/int/readme
- caaba_3.0/mecca/kpp/int/rosenbrock_tlm.def
- caaba_3.0/mecca/kpp/int/none.def
- caaba_3.0/mecca/kpp/int/tau_leap.f90
- caaba_3.0/mecca/kpp/int/user_contributed/
- caaba_3.0/mecca/kpp/int/user_contributed/ros2_manual.def
- caaba_3.0/mecca/kpp/int/user_contributed/readme
- caaba_3.0/mecca/kpp/int/user_contributed/ros2_manual.f90
- caaba_3.0/mecca/kpp/int/rosenbrock_tlm.f90
- caaba_3.0/mecca/kpp/int/kpp_seulex.def
- caaba_3.0/mecca/kpp/int/rosenbrock_posdef.def
- caaba_3.0/mecca/kpp/int/none.c
- caaba_3.0/mecca/kpp/int/ros2_manual.f90
- caaba_3.0/mecca/kpp/int/rosenbrock_mz.def
- caaba_3.0/mecca/kpp/int/kpp_radau5.def
- caaba_3.0/mecca/kpp/int/sdirk.def
- caaba_3.0/mecca/kpp/int/kpp_seulex.f
- caaba_3.0/mecca/kpp/int/kpp_odessa_ddm.def
- caaba_3.0/mecca/kpp/int/kpp_dvode.def
- caaba_3.0/mecca/kpp/Makefile.defs.Linux
- caaba_3.0/mecca/kpp/CHANGELOG
- caaba_3.0/mecca/kpp/drv/
- caaba_3.0/mecca/kpp/drv/general_ddm_ic.f
- caaba_3.0/mecca/kpp/drv/exact.c
- caaba_3.0/mecca/kpp/drv/general.c
- caaba_3.0/mecca/kpp/drv/general.m
- caaba_3.0/mecca/kpp/drv/main.f
- caaba_3.0/mecca/kpp/drv/main.c
- caaba_3.0/mecca/kpp/drv/general_soa.f90
- caaba_3.0/mecca/kpp/drv/general.f90
- caaba_3.0/mecca/kpp/drv/none.f
- caaba_3.0/mecca/kpp/drv/none.f90
- caaba_3.0/mecca/kpp/drv/general_tlm.f90
- caaba_3.0/mecca/kpp/drv/general_adj.f90
- caaba_3.0/mecca/kpp/drv/exact.f
- caaba_3.0/mecca/kpp/drv/general_complete.f90
- caaba_3.0/mecca/kpp/drv/none.c
- caaba_3.0/mecca/kpp/drv/general_stochastic.f90
- caaba_3.0/mecca/kpp/drv/general.f
- caaba_3.0/mecca/kpp/drv/general_stochastic.c
- caaba_3.0/mecca/kpp/cflags
- caaba_3.0/mecca/kpp/examples/
- caaba_3.0/mecca/kpp/examples/saprc_m.kpp
- caaba_3.0/mecca/kpp/examples/saprc2006.kpp
- caaba_3.0/mecca/kpp/examples/saprc_c.kpp
- caaba_3.0/mecca/kpp/examples/small_f90.kpp
- caaba_3.0/mecca/kpp/examples/saprc_f90.kpp
- caaba_3.0/mecca/kpp/examples/sd.kpp
- caaba_3.0/mecca/kpp/examples/small_f77.kpp
- caaba_3.0/mecca/kpp/examples/sdtlm.kpp
- caaba_3.0/mecca/kpp/examples/rktlm.kpp
- caaba_3.0/mecca/kpp/examples/small_m.kpp
- caaba_3.0/mecca/kpp/examples/sdadj.kpp
- caaba_3.0/mecca/kpp/examples/cell.kpp
- caaba_3.0/mecca/kpp/examples/small_c.kpp
- caaba_3.0/mecca/kpp/examples/rosenbrock90.kpp
- caaba_3.0/mecca/kpp/examples/rosadj.kpp
- caaba_3.0/mecca/kpp/examples/readme
- caaba_3.0/mecca/kpp/examples/rk.kpp
- caaba_3.0/mecca/kpp/examples/ros.kpp
- caaba_3.0/mecca/kpp/examples/saprc_f77.kpp
- caaba_3.0/mecca/kpp/examples/rostlm.kpp
- caaba_3.0/mecca/kpp/examples/radau90.kpp
- caaba_3.0/mecca/kpp/Makefile.defs.AIX
- caaba_3.0/mecca/kpp/util/
- caaba_3.0/mecca/kpp/util/sutil.f
- caaba_3.0/mecca/kpp/util/UpdateSun.f90
- caaba_3.0/mecca/kpp/util/dFun_dRcoeff.c
- caaba_3.0/mecca/kpp/util/dJac_dRcoeff.f90
- caaba_3.0/mecca/kpp/util/dJac_dRcoeff.m
- caaba_3.0/mecca/kpp/util/UserRateLaws.c
- caaba_3.0/mecca/kpp/util/UserRateLaws.f90
- caaba_3.0/mecca/kpp/util/Mex_Fun.f90
- caaba_3.0/mecca/kpp/util/Mex_Fun.f
- caaba_3.0/mecca/kpp/util/sutil.f90
- caaba_3.0/mecca/kpp/util/Makefile.c
- caaba_3.0/mecca/kpp/util/sparsity_plots.m
- caaba_3.0/mecca/kpp/util/Template_Fun_Chem.m
- caaba_3.0/mecca/kpp/util/util.c
- caaba_3.0/mecca/kpp/util/UpdateSun.c
- caaba_3.0/mecca/kpp/util/UpdateSun.m
- caaba_3.0/mecca/kpp/util/UpdateSun.f
- caaba_3.0/mecca/kpp/util/blas.f90
- caaba_3.0/mecca/kpp/util/blas.f
- caaba_3.0/mecca/kpp/util/mex.c
- caaba_3.0/mecca/kpp/util/util.m
- caaba_3.0/mecca/kpp/util/Mex_Fun.c
- caaba_3.0/mecca/kpp/util/Mex_Hessian.f
- caaba_3.0/mecca/kpp/util/Makefile.f90
- caaba_3.0/mecca/kpp/util/UserRateLaws.f
- caaba_3.0/mecca/kpp/util/sutil.c
- caaba_3.0/mecca/kpp/util/util.f90
- caaba_3.0/mecca/kpp/util/ncar.h
- caaba_3.0/mecca/kpp/util/Mex_Jac_SP.f
- caaba_3.0/mecca/kpp/util/UserRateLaws.m
- caaba_3.0/mecca/kpp/util/dJac_dRcoeff.f
- caaba_3.0/mecca/kpp/util/Mex_Hessian.c
- caaba_3.0/mecca/kpp/util/Mex_Hessian.f90
- caaba_3.0/mecca/kpp/util/Mex_Jac_SP.f90
- caaba_3.0/mecca/kpp/util/blas.c
- caaba_3.0/mecca/kpp/util/util.f
- caaba_3.0/mecca/kpp/util/dJac_dRcoeff.c
- caaba_3.0/mecca/kpp/util/mex.f
- caaba_3.0/mecca/kpp/util/Mex_Jac_SP.c
- caaba_3.0/mecca/kpp/util/dFun_dRcoeff.m
[truncated: 418 more entries]
