# Supplementary material for: The atmospheric chemistry box model CAABA/MECCA-3.0
Source: Copernicus journal article supplement (doi:10.5194/gmd-4-373-2011), 2011-05-06
Supplement: Supplementary file 9 [file gmd-4-373-2011-supplement.zip › caaba_3.0/caaba_io.f90]

!*******************************************************************************

MODULE caaba_io

#ifdef NETCDF
INCLUDE 'caaba_io_netcdf.inc'
#else
INCLUDE 'caaba_io_ascii.inc'
#endif

END MODULE caaba_io

!*******************************************************************************
