# Supplementary material for: The atmospheric chemistry box model CAABA/MECCA-3.0
Source: Copernicus journal article supplement (doi:10.5194/gmd-4-373-2011), 2011-05-06
Supplement: Supplementary file 9 [file gmd-4-373-2011-supplement.zip › caaba_3.0/cmg]

#! /bin/tcsh -f 
# -*- Shell-script -*- Time-stamp: <2010-11-24 19:43:56 sander>
# cmg = caaba/mecca-grep

# put the same find commands here as in etags command in main.mk:
find . -name "*.f90"                            | xargs grep -iF "$1"
find . -name "*.inc"                            | xargs grep -iF "$1"
find . -name "*.nml"                            | xargs grep -iF "$1"
find . -name "*.tex"                            | xargs grep -iF "$1"
find . -name "*.eqn"                            | xargs grep -iF "$1"
find . -name "*.spc"                            | xargs grep -iF "$1"
find . -name "*.kpp"                            | xargs grep -iF "$1"
find . -name "*.awk"                            | xargs grep -iF "$1"
find . -name "*.bat"                            | xargs grep -iF "$1"
find . -type f -perm -100 -not -regex ".*\.exe" | xargs grep -iF "$1"

exit
