# Supplementary material for: The atmospheric chemistry box model CAABA/MECCA-3.0
Source: Copernicus journal article supplement (doi:10.5194/gmd-4-373-2011), 2011-05-06
Supplement: Supplementary file 9 [file gmd-4-373-2011-supplement.zip › caaba_3.0/depend.mk]

# DO NOT DELETE THIS LINE - used by make depend
caaba.o: caaba_io.o caaba_mem.o messy_e4chem.o messy_main_constants_mem.o
caaba.o: messy_main_control_cb.o messy_main_timer.o messy_main_tools.o
caaba.o: messy_mecca.o messy_mecca_kpp.o
caaba_io.o: caaba_io_ascii.inc caaba_io_netcdf.inc
caaba_io.o: caaba_mem.o messy_main_constants_mem.o
caaba_mem.o: messy_main_constants_mem.o
messy_cmn_gasaq.o: messy_main_blather.o messy_main_constants_mem.o
messy_cmn_gasaq.o: messy_main_tools.o
messy_e4chem.o: messy_main_constants_mem.o messy_main_tools.o
messy_e4chem_box.o: caaba_io.o caaba_mem.o messy_cmn_photol_mem.o
messy_e4chem_box.o: messy_e4chem.o messy_jval.o messy_main_constants_mem.o
messy_e4chem_box.o: messy_main_tools.o
messy_jval.o: messy_jval_jvpp.inc
messy_jval.o: messy_cmn_photol_mem.o messy_main_constants_mem.o
messy_jval.o: messy_main_tools.o
messy_jval_box.o: caaba_io.o caaba_mem.o messy_cmn_photol_mem.o messy_jval.o
messy_jval_box.o: messy_main_constants_mem.o messy_main_tools.o
messy_main_blather.o: messy_main_constants_mem.o
messy_main_control_cb.o: caaba_mem.o messy_cmn_gasaq.o messy_e4chem_box.o
messy_main_control_cb.o: messy_jval_box.o messy_main_constants_mem.o
messy_main_control_cb.o: messy_main_timer.o messy_mecca_box.o messy_readj_box.o
messy_main_control_cb.o: messy_sappho_box.o messy_semidep_box.o
messy_main_control_cb.o: messy_traject_box.o
messy_main_rnd.o: messy_main_constants_mem.o messy_main_rnd_lux.o
messy_main_rnd.o: messy_main_rnd_mtw.o messy_main_tools.o
messy_main_timer.o: messy_main_constants_mem.o messy_main_tools.o
messy_main_tools.o: messy_main_blather.o messy_main_constants_mem.o
messy_mecca.o: messy_main_constants_mem.o messy_main_rnd.o messy_main_tools.o
messy_mecca.o: messy_mecca_kpp.o
messy_mecca_aero.o: messy_cmn_gasaq.o messy_main_constants_mem.o
messy_mecca_aero.o: messy_mecca_kpp.o
messy_mecca_box.o: caaba_io.o caaba_mem.o messy_cmn_photol_mem.o messy_jval.o
messy_mecca_box.o: messy_main_constants_mem.o messy_main_tools.o messy_mecca.o
messy_mecca_box.o: messy_mecca_aero.o messy_mecca_dbl_box.o messy_mecca_kpp.o
messy_mecca_box.o: messy_mecca_tag_box.o messy_readj.o messy_sappho.o
messy_mecca_dbl_box.o: messy_mecca_kpp.o
messy_mecca_khet.o: messy_main_constants_mem.o messy_main_tools.o messy_mecca.o
messy_mecca_kpp.o: messy_main_constants_mem.o messy_main_tools.o
messy_mecca_kpp.o: messy_mecca_kpp_global.o messy_mecca_kpp_initialize.o
messy_mecca_kpp.o: messy_mecca_kpp_integrator.o messy_mecca_kpp_monitor.o
messy_mecca_kpp.o: messy_mecca_kpp_parameters.o messy_mecca_kpp_rates.o
messy_mecca_kpp.o: messy_mecca_kpp_util.o
messy_mecca_kpp_function.o: messy_mecca_kpp_parameters.o
messy_mecca_kpp_global.o: messy_cmn_photol_mem.o messy_mecca_kpp_parameters.o
messy_mecca_kpp_initialize.o: messy_mecca_kpp_global.o
messy_mecca_kpp_initialize.o: messy_mecca_kpp_parameters.o
messy_mecca_kpp_integrator.o: messy_mecca_kpp_function.o
messy_mecca_kpp_integrator.o: messy_mecca_kpp_global.o
messy_mecca_kpp_integrator.o: messy_mecca_kpp_jacobian.o
messy_mecca_kpp_integrator.o: messy_mecca_kpp_linearalgebra.o
messy_mecca_kpp_integrator.o: messy_mecca_kpp_parameters.o
messy_mecca_kpp_integrator.o: messy_mecca_kpp_rates.o
messy_mecca_kpp_jacobian.o: messy_mecca_kpp_jacobiansp.o
messy_mecca_kpp_jacobian.o: messy_mecca_kpp_parameters.o
messy_mecca_kpp_linearalgebra.o: messy_mecca_kpp_jacobiansp.o
messy_mecca_kpp_linearalgebra.o: messy_mecca_kpp_parameters.o
messy_mecca_kpp_parameters.o: messy_mecca_kpp_precision.o
messy_mecca_kpp_rates.o: messy_cmn_photol_mem.o messy_main_constants_mem.o
messy_mecca_kpp_rates.o: messy_mecca_kpp_global.o messy_mecca_kpp_parameters.o
messy_mecca_kpp_util.o: messy_mecca_kpp_global.o messy_mecca_kpp_monitor.o
messy_mecca_kpp_util.o: messy_mecca_kpp_parameters.o
messy_mecca_tag_box.o: messy_main_constants_mem.o messy_mecca_kpp.o
messy_readj.o: messy_cmn_photol_mem.o messy_main_constants_mem.o
messy_readj_box.o: caaba_io.o caaba_mem.o messy_cmn_photol_mem.o
messy_readj_box.o: messy_main_constants_mem.o messy_main_tools.o messy_readj.o
messy_sappho.o: messy_cmn_photol_mem.o messy_main_constants_mem.o
messy_sappho_box.o: caaba_io.o caaba_mem.o messy_cmn_photol_mem.o
messy_sappho_box.o: messy_main_constants_mem.o messy_main_tools.o
messy_sappho_box.o: messy_sappho.o
messy_semidep_box.o: caaba_mem.o messy_main_constants_mem.o messy_mecca_kpp.o
messy_traject_box.o: caaba_io.o caaba_mem.o messy_main_constants_mem.o
messy_traject_box.o: messy_main_timer.o messy_main_tools.o
caaba_module.mod: caaba.o
