# Supplementary material for: The atmospheric chemistry box model CAABA/MECCA-3.0
Source: Copernicus journal article supplement (doi:10.5194/gmd-4-373-2011), 2011-05-06
Supplement: Supplementary file 9 [file gmd-4-373-2011-supplement.zip › caaba_3.0/jval.nml]

! -*- f90 -*-

!*****************************************************************************
! control namelist for JVAL
!*****************************************************************************

&CTRL
!
!# FOR SOLAR CYCLE
r_sol = 0.5        ! 0: solar minimum, 1: solar maximum
!                !!! this is obsolete, if jval_solar in CPL is active
!
!# QUANTUM YIELD FOR CH3COCH3:
!qy_ch3coch3 = 1 ! Gierzack & ECHAM5 (old IUPAC) (default)
qy_ch3coch3 = 2 ! BLITZ 2004
!qy_ch3coch3 = 3 ! IUPAC
!
/

!*****************************************************************************
! coupling namelist for JVAL
!*****************************************************************************

&CPL
!
l_skip_lg = T,             ! skip Lagrangian calculation?
!l_force = T,               ! calculate all species (not only for tracers)
!l_heating = T,             ! calculate UV heating rates by O2 and O3 ?
!
jval_O3 = 'tracer_gp', 'O3',
!jval_O3 = 'ECHAM5', 'relo3',   ! ONLY FOR isw_rad4all = 1 in rad4all.nml
!jval_O3 = 'rad4all', 'O3_pre', ! ONLY FOR isw_rad4all = 2 in rad4all.nml
!
! # SOLAR CYCLE TIME SERIES; if commented, r_sol in CTRL is used instead 
jval_solar = 'import_ts','solact',  ! F10.7 cm (1 parameter), or 16 parameters
!                                   ! (see &CTRL_TS in import.nml)
!
/

!*****************************************************************************
! regridder
!*****************************************************************************

&RGTEVENTS
RG_TRIG(1) = 1,'months','first',0,  'jval', 1, 1, 12, $START_MONTH, 'O3_H',
/

&regrid
!outfile  =  "ncrg_${ECHAM5_HRES}_halo3_hall12.nc",
infile    = "$INPUTDIR_MESSY/jval/halo3_hall12.nc",
i_latm    = "LAT",          ! name of latitude axis in input file
i_latr    = -90.0,90.0,     ! range of latitude axis in input file
i_lonm    = "XHELP"         ! name of longitude axis in input file
i_lonr    = 0., 360.,       ! range of longitude axis in input file
i_timem   = "THELP",        ! name of time axis in input file
i_hyai    = "PRESSedges",   ! name of hybrid A coefficients in input file
i_hyam    = "PRESS",        ! name of hybrid A coefficients in input file
i_hyar    = 0.005, 1013.25, ! extends pressure range from input file
i_p0      = "100. Pa",      ! necessary for hPa to Pa conversion
pressure  = T,              ! vert. regridding in press. coordinates
var       = "O3_H",         ! name of input variable
/

!*****************************************************************************
