# Supplementary material for: The atmospheric chemistry box model CAABA/MECCA-3.0
Source: Copernicus journal article supplement (doi:10.5194/gmd-4-373-2011), 2011-05-06
Supplement: Supplementary file 9 [file gmd-4-373-2011-supplement.zip › caaba_3.0/mecca/check_conservation.pl]

#!/usr/bin/perl -w

# This program analyses the reactions present in $eqnfile, assessing
# the conservation of the chemical elements as given in $spcfile.
# Reactions found to be non-conserving are written to standard output
# along with a report of the elemental imbalance in each case

# Author:
#   Tim Butler, March 2008
#   (minor changes by Rolf Sander, March 2008)

# EXAMPLE USAGE:
#   ./check_conservation.pl
#   ./check_conservation.pl myfile.spc myfile.eqn > output.log

$eqnfile = "gas.eqn";
$spcfile = "gas.spc";
#  mz_rs_20080313+
$spcfile = "$ARGV[0]" if $#ARGV>-1;
$eqnfile = "$ARGV[1]" if $#ARGV>0;
print "spcfile = $spcfile\n";
print "eqnfile = $eqnfile\n\n";
#  mz_rs_20080313-

$elements = &get_elements_spc($spcfile);

unless (defined $elements->{H2O}) {
	$elements->{H2O}{H} = 2;
	$elements->{H2O}{O} = 1;
}

open FILE, $eqnfile or die $!;
foreach my $line (<FILE>) {
	next if $line =~ /IGNORE/;
	my ($number, $reactants, $products, $labels, $rate, $extra) = $line =~ m/
			^\s* <(.*?)>        # reaction number
			(.*?) = (.*?)       # reactants = products
			: \s+ ({.*?}) \s+   # reaction labels
			(.*?);              # rate expression terminated by ";"
			(.*?)$              # everything else
		/x;
	next unless defined $number
		and defined $reactants
		and defined $products
		and defined $labels
		and defined $rate;
	undef $extra;
	$reactants =~ s/{.*?}//g;
	$products =~ s/{.*?}//g;
	$reactants =~ s/^\s*(.*?)\s*$/$1/;
	$products =~ s/^\s*(.*?)\s*$/$1/;
	my @reactants = split /\s*\+\s*/, $reactants;
	my @products = split /\s*\+\s*/, $products;
	my $balance = &compare(&sum(@reactants), &sum(@products));
	# Here you can manipulate or check %$balance to control the output
	#delete $balance->{O} if defined $balance->{O};
	my $result = &stringify($balance);
	print "$line\t$result\n\n" unless $result eq "";
}
close FILE;

sub compare {
	my ($lhs, $rhs) = @_;
	my %result;
	$result{$_} += $rhs->{$_} foreach keys %$rhs;
	$result{$_} -= $lhs->{$_} foreach keys %$lhs;
	return \%result;
}

sub stringify {
	my $thing = $_[0];
	my $string = "";
	foreach my $element (keys %{ $thing }) {
		my $effect = $thing->{$element};
		next if abs($effect) < 1E-15; # mz_rs_20080313
		$effect = "+$effect" unless $effect < 0;
		$string .= "$effect $element; ";
	}
	$string =~ s/\s$//;
	return $string;
}

sub sum {
	my (@chunks) = @_;
	my %tally;
	foreach my $chunk (@chunks) {
		my ($fraction, $species) = &_get_fraction($chunk);
		next if $species eq 'hv';
		die "Don't know anything about $species"
			unless exists $elements->{$species};
		foreach my $element (keys %{ $elements->{$species} }) {
			$tally{$element} += $fraction * $elements->{$species}{$element};
		}
	}
	return \%tally;
}

sub get_elements_spc {
	my $file = $_[0];
	open FILE, $file or die $!;
	my %elements;
	foreach my $line (<FILE>) {
		#  mz_rs_20080628+
		# allow spaces at the start of a line in spc file:
		# my ($species, $elements) = $line =~ /^(\S+)\s*=\s*(.*)\s*;/;
		my ($species, $elements) = $line =~ /^\s*(\S+)\s*=\s*(.*)\s*;/;
		#  mz_rs_20080628-
		next unless defined $species and defined $elements;
		my @elements = split /\+/, $elements;
		foreach my $chunk (@elements) {
			my ($count, $element) = $chunk =~ /\s*(\d*)\s*([A-Za-z]+)\s*/;
			$count = 1 if $count eq "";
			$elements{$species}{$element} += $count;
		}
	}
	close FILE;
	return \%elements;
}

sub get_elements_tracdef {
	my $file = $_[0];
	open FILE, $file or die $!;
	my %elements;
	foreach my $line (<FILE>) {
		next if $line =~ /^%/;
		next unless $line =~ /AIR/;
		my @fields = split /&/, $line;
		next unless @fields == 24;
		my $species = $fields[0];
		$species =~ s/[' ]//g;
		my $wtstring = $fields[6];
		$wtstring =~ s/^\s*(.*?)\s*$/$1/;
		next unless $wtstring =~ /^M/;
		my @elements = split /\+/, $wtstring;
		#print "$species: @elements\n";
		foreach my $element_count (@elements) {
			my ($element, $count) = split /\*/, $element_count;
			$element =~ s/^M//;
			$count = 1 unless defined $count;
			$count =~ s/\.//;
			#print "\t$element -> $count\n";
			$elements{$species}{$element} += $count;
		}
	}
	close FILE;
	return \%elements;
}

sub _get_fraction {
	my $string = shift;
	my ($fraction, $species);
	unless (($fraction, $species) = $string =~ /^([.\d]+)\s*(.*)/) {
		($fraction, $species) = (1, $string);
	}
	return ($fraction, $species);
}
