# Supplementary material for: The atmospheric chemistry box model CAABA/MECCA-3.0
Source: Copernicus journal article supplement (doi:10.5194/gmd-4-373-2011), 2011-05-06
Supplement: Supplementary file 9 [file gmd-4-373-2011-supplement.zip › caaba_3.0/mecca/graphviz/Br.dot]

// Created automatically by xgraphviz, DO NOT EDIT!
digraph Br {
  concentrate=true;
  rankdir=LR;
  size="8,8";
"Br\nchemistry"
  [shape=box, fontsize=30,
  style="filled", color=red];
subgraph species {
node[shape=oval,
  color=yellow,
  style="filled"];
Br
Br2
BrCl
BrHgOBr
BrNO2
BrNO3
BrO
CF2ClBr
CF3Br
CH2Br2
CH2ClBr
CH3Br
CHBr3
CHCl2Br
CHClBr2
ClHgBr
ClHgOBr
HBr
HOBr
HgBr
HgBr2
IBr
}
Br -> Br2 [label = "BrCl (G7600)"];
Br -> Br2 [label = "BrNO3 (G7300)"];
Br -> BrCl [label = "Cl2 (G7601)"];
Br -> BrO [label = "O3 (G7100)"];
Br -> ClHgBr [label = "HgCl (G10707)"];
Br -> HBr [label = "C2H2 (G7406)"];
Br -> HBr [label = "C2H4 (G7404)"];
Br -> HBr [label = "CH3CHO (G7405)"];
Br -> HBr [label = "CH3OOH (G7401)"];
Br -> HBr [label = "DMS (G9700)"];
Br -> HBr [label = "HCHO (G7400)"];
Br -> HBr [label = "HO2 (G7200)"];
Br -> HgBr [label = "Hg (G10700)"];
Br -> HgBr2 [label = "HgBr (G10701)"];
Br2 -> Br [label = "Cl (G7602)"];
Br2 -> Br [label = "OH (G7204)"];
Br2 -> Br [label = "hv (J7000)"];
Br2 -> BrCl [label = "Cl (G7602)"];
Br2 -> HOBr [label = "OH (G7204)"];
Br2 -> HgBr2 [label = "Hg (G10702)"];
BrCl -> Br [label = "Cl (G7604)"];
BrCl -> Br [label = "hv (J7600)"];
BrCl -> Br2 [label = "Br (G7600)"];
BrNO2 -> Br [label = "hv (J7300)"];
BrNO3 -> Br [label = "hv (J7301)"];
BrNO3 -> Br2 [label = "Br (G7300)"];
BrNO3 -> BrCl [label = "HCl (HET541)"];
BrNO3 -> BrO [label = " (G7303)"];
BrNO3 -> BrO [label = "hv (J7301)"];
BrNO3 -> HOBr [label = "H2O (HET520)"];
BrO -> Br [label = "BrO (G7102a)"];
BrO -> Br [label = "CH3O2 (G7402b)"];
BrO -> Br [label = "ClO (G7603a)"];
BrO -> Br [label = "ClO (G7603b)"];
BrO -> Br [label = "DMS (G9701)"];
BrO -> Br [label = "Hg (G10703)"];
BrO -> Br [label = "I (G8700)"];
BrO -> Br [label = "IO (G8701)"];
BrO -> Br [label = "NO (G7301)"];
BrO -> Br [label = "O3P (G7101)"];
BrO -> Br [label = "hv (J7100)"];
BrO -> Br2 [label = "BrO (G7102b)"];
BrO -> BrCl [label = "ClO (G7603c)"];
BrO -> BrHgOBr [label = "HgBr (G10704)"];
BrO -> BrNO3 [label = "NO2 (G7302)"];
BrO -> ClHgOBr [label = "HgCl (G10705)"];
BrO -> HOBr [label = "CH3O2 (G7402a)"];
BrO -> HOBr [label = "HO2 (G7201)"];
CF2ClBr -> Br [label = "hv (J7601)"];
CF3Br -> Br [label = "hv (J7500)"];
CH2Br2 -> Br [label = "OH (G7408)"];
CH2Br2 -> Br [label = "hv (J7401)"];
CH2ClBr -> Br [label = "OH (G7607)"];
CH2ClBr -> Br [label = "hv (J7602)"];
CH3Br -> Br [label = "OH (G7403)"];
CH3Br -> Br [label = "hv (J7400)"];
CHBr3 -> Br [label = "OH (G7407)"];
CHBr3 -> Br [label = "hv (J7402)"];
CHCl2Br -> Br [label = "OH (G7605)"];
CHCl2Br -> Br [label = "hv (J7603)"];
CHClBr2 -> Br [label = "OH (G7606)"];
CHClBr2 -> Br [label = "hv (J7604)"];
HBr -> Br [label = "OH (G7202)"];
HBr -> Br2 [label = "HOBr (HET510)"];
HBr -> BrCl [label = "ClNO3 (HET540)"];
HBr -> BrCl [label = "HOCl (HET542)"];
HOBr -> Br [label = "hv (J7200)"];
HOBr -> Br2 [label = "HBr (HET510)"];
HOBr -> BrCl [label = "HCl (HET543)"];
HOBr -> BrO [label = "O3P (G7203)"];
HgBr -> BrHgOBr [label = "BrO (G10704)"];
HgBr -> ClHgBr [label = "Cl (G10706)"];
HgBr -> HgBr2 [label = "Br (G10701)"];
IBr -> Br [label = "hv (J8700)"];
}
