# Supplementary material for: The atmospheric chemistry box model CAABA/MECCA-3.0
Source: Copernicus journal article supplement (doi:10.5194/gmd-4-373-2011), 2011-05-06
Supplement: Supplementary file 9 [file gmd-4-373-2011-supplement.zip › caaba_3.0/mecca/graphviz/C1.dot]

// Created automatically by xgraphviz, DO NOT EDIT!
digraph C1 {
  concentrate=true;
  rankdir=LR;
  size="8,8";
"C1\nchemistry"
  [shape=box, fontsize=30,
  style="filled", color=red];
subgraph species {
node[shape=oval,
  color=yellow,
  style="filled"];
CH2ClI
CH2I2
CH3Br
CH3Cl
CH3I
CH3O2
CH3OH
CH3OOH
CH3SO2
CH3SO3
CH3SO3H
CH4
CO
CO2
HCHO
HCOOH
LCARBON
}
ACETOL -> HCHO [label = "hv (J4302)"];
C2H2 -> CH3O2 [label = "Br (G7406)"];
C2H2 -> CH3O2 [label = "Cl (G6411)"];
C2H2 -> CO [label = "OH (G4222)"];
C2H2 -> HCOOH [label = "OH (G4222)"];
C2H4 -> CO [label = "O3 (G4201)"];
C2H4 -> HCHO [label = "O3 (G4201)"];
C2H4 -> HCOOH [label = "O3 (G4201)"];
C2H6 -> CH3O2 [label = "Cl (G6412)"];
C3H6 -> CH3O2 [label = "O3 (G4301)"];
C3H6 -> CH4 [label = "O3 (G4301)"];
C3H6 -> CO [label = "O3 (G4301)"];
C3H6 -> CO2 [label = "O3 (G4301)"];
C3H6 -> HCHO [label = "O3 (G4301)"];
C3H6 -> HCOOH [label = "O3 (G4301)"];
C3H7I -> CH3O2 [label = "OH (G8400)"];
C3H7I -> CH3O2 [label = "hv (J8402)"];
C3H8 -> CO2 [label = "OH (G4300)"];
C5H8 -> CH3O2 [label = "O3 (G4500)"];
C5H8 -> CO [label = "O3 (G4500)"];
C5H8 -> CO2 [label = "O3 (G4500)"];
C5H8 -> HCHO [label = "O3 (G4500)"];
C5H8 -> HCOOH [label = "O3 (G4500)"];
CH2ClI -> CO [label = "hv (J8403)"];
CH2I2 -> CO [label = "hv (J8400)"];
CH3Br -> CH3O2 [label = "hv (J7400)"];
CH3CHO -> CH3O2 [label = "hv (J4201)"];
CH3CHO -> CO [label = "hv (J4201)"];
CH3CO2H -> CH3O2 [label = "OH (G4210)"];
CH3CO2H -> CO2 [label = "OH (G4210)"];
CH3CO3 -> CH3O2 [label = " (G4217)"];
CH3CO3 -> CH3O2 [label = "NO (G4212)"];
CH3CO3 -> CH3O2 [label = "NO3 (G4214)"];
CH3CO3 -> CO2 [label = " (G4217)"];
CH3CO3 -> CO2 [label = "NO (G4212)"];
CH3CO3 -> CO2 [label = "NO3 (G4214)"];
CH3CO3H -> CH3O2 [label = "hv (J4202)"];
CH3CO3H -> CO2 [label = "hv (J4202)"];
CH3COCH2O2 -> HCHO [label = " (G4314)"];
CH3COCH2O2 -> HCHO [label = "NO (G4313)"];
CH3COCH2O2 -> HCHO [label = "NO3 (G4321)"];
CH3COCH3 -> CH3O2 [label = "hv (J4301)"];
CH3Cl -> CH3O2 [label = "hv (J6400)"];
CH3I -> CH3O2 [label = "hv (J8401)"];
CH3I -> HCHO [label = "NO3 (G8402)"];
CH3O2 -> CH3OH [label = " (G4106b)"];
CH3O2 -> CH3OOH [label = "HO2 (G4103)"];
CH3O2 -> HCHO [label = " (G4106a)"];
CH3O2 -> HCHO [label = " (G4106b)"];
CH3O2 -> HCHO [label = "BrO (G7402a)"];
CH3O2 -> HCHO [label = "BrO (G7402b)"];
CH3O2 -> HCHO [label = "ClO (G6403)"];
CH3O2 -> HCHO [label = "IO (G8401)"];
CH3O2 -> HCHO [label = "NO (G4104)"];
CH3O2 -> HCHO [label = "NO3 (G4105)"];
CH3OH -> HCHO [label = "OH (G4102)"];
CH3OOH -> CH3O2 [label = "Br (G7401)"];
CH3OOH -> CH3O2 [label = "OH (G4107)"];
CH3OOH -> HCHO [label = "Cl (G6402)"];
CH3OOH -> HCHO [label = "OH (G4107)"];
CH3OOH -> HCHO [label = "hv (J4100)"];
CH3SO2 -> CH3O2 [label = " (G9403)"];
CH3SO2 -> CH3SO3 [label = "O3 (G9404)"];
CH3SO3 -> CH3SO3H [label = "HO2 (G9405)"];
CH4 -> CH3O2 [label = "Cl (G6400)"];
CH4 -> CH3O2 [label = "O1D (G4100)"];
CH4 -> CH3O2 [label = "OH (G4101)"];
CH4 -> CO [label = "hv (J4103)"];
CH4 -> HCHO [label = "O1D (G4100)"];
CO -> CO2 [label = "OH (G4110)"];
CO2 -> CO [label = "hv (J4102)"];
CO2H3CHO -> CO [label = "hv (J4418)"];
CO2H3CO3 -> CO2 [label = " (G4451)"];
CO2H3CO3 -> CO2 [label = "NO (G4453)"];
CO2H3CO3 -> CO2 [label = "NO3 (G4454)"];
CO2H3CO3H -> CO2 [label = "hv (J4409)"];
DMS -> CH3SO2 [label = "Br (G9700)"];
DMS -> CH3SO2 [label = "Cl (G9600)"];
DMS -> CH3SO2 [label = "NO3 (G9401)"];
DMS -> CH3SO2 [label = "OH (G9400a)"];
DMS -> HCHO [label = "Br (G9700)"];
DMS -> HCHO [label = "Cl (G9600)"];
DMS -> HCHO [label = "NO3 (G9401)"];
DMS -> HCHO [label = "OH (G9400a)"];
DMSO -> CH3O2 [label = "OH (G9402)"];
DMSO -> CH3SO3H [label = "OH (G9402)"];
DMSO -> HCHO [label = "OH (G9402)"];
ETHOHNO3 -> HCHO [label = "hv (J4212)"];
GLYOX -> CO [label = "NO3 (G4235)"];
GLYOX -> CO [label = "OH (G4234)"];
GLYOX -> CO [label = "hv (J4208)"];
HCHO -> CO [label = "Br (G7400)"];
HCHO -> CO [label = "Cl (G6401)"];
HCHO -> CO [label = "NO3 (G4109)"];
HCHO -> CO [label = "OH (G4108)"];
HCHO -> CO [label = "hv (J4101a)"];
HCHO -> CO [label = "hv (J4101b)"];
HCOC5 -> HCHO [label = "hv (J4515)"];
HCOCO2H -> CO [label = "OH (G4240)"];
HCOCO2H -> CO [label = "hv (J4209)"];
HCOCO2H -> CO2 [label = "OH (G4240)"];
HCOCO2H -> CO2 [label = "hv (J4209)"];
HCOCO3 -> CO [label = " (G4236)"];
HCOCO3 -> CO [label = "NO (G4238)"];
HCOCO3 -> CO [label = "NO3 (G4239)"];
HCOCO3 -> CO2 [label = " (G4236)"];
HCOCO3 -> CO2 [label = "NO (G4238)"];
HCOCO3 -> CO2 [label = "NO3 (G4239)"];
HCOCO3H -> CO [label = "hv (J4210)"];
HCOCO3H -> CO2 [label = "hv (J4210)"];
HCOOH -> CO2 [label = "OH (G4111)"];
HOCH2CH2O -> HCHO [label = " (G4247b)"];
HOCH2CH2O2 -> HCHO [label = "NO (G4243)"];
HOCH2CHO -> CO [label = "hv (J4205)"];
HOCH2CHO -> HCHO [label = "hv (J4205)"];
HOCH2CO2H -> CO2 [label = "OH (G4230)"];
HOCH2CO2H -> HCHO [label = "OH (G4230)"];
HOCH2CO3 -> CO2 [label = " (G4225)"];
HOCH2CO3 -> CO2 [label = "NO (G4227)"];
HOCH2CO3 -> CO2 [label = "NO3 (G4229)"];
HOCH2CO3 -> HCHO [label = " (G4225)"];
HOCH2CO3 -> HCHO [label = "NO (G4227)"];
HOCH2CO3 -> HCHO [label = "NO3 (G4229)"];
HOCH2CO3H -> CO2 [label = "hv (J4206)"];
HOCH2CO3H -> HCHO [label = "hv (J4206)"];
HOCH2COCHO -> CO [label = "NO3 (G4334)"];
HOCH2COCHO -> CO [label = "OH (G4333)"];
HOCH2COCHO -> CO [label = "hv (J4311)"];
HOCH2COCO2H -> CO2 [label = "OH (G4335)"];
HOCH2COCO2H -> CO2 [label = "hv (J4308)"];
HYPERACET -> HCHO [label = "hv (J4304)"];
HYPROPO2 -> HCHO [label = " (G4322)"];
HYPROPO2 -> HCHO [label = "NO (G4324)"];
HYPROPO2 -> HCHO [label = "NO3 (G4325)"];
HYPROPO2H -> HCHO [label = "hv (J4309)"];
ISOPBNO3 -> CH3O2 [label = "hv (J4505)"];
ISOPBNO3 -> HCHO [label = "OH (G4523)"];
ISOPBNO3 -> HCHO [label = "hv (J4505)"];
ISOPBO2 -> CH3O2 [label = " (G4517)"];
ISOPBO2 -> CH3O2 [label = "NO (G4519)"];
ISOPBO2 -> CH3O2 [label = "NO3 (G4520)"];
ISOPBO2 -> HCHO [label = " (G4517)"];
ISOPBO2 -> HCHO [label = "NO (G4519)"];
ISOPBO2 -> HCHO [label = "NO3 (G4520)"];
ISOPBOH -> CH3O2 [label = "OH (G4522)"];
ISOPBOH -> HCHO [label = "OH (G4522)"];
ISOPBOOH -> CH3O2 [label = "hv (J4504)"];
ISOPBOOH -> HCHO [label = "hv (J4504)"];
ISOPDNO3 -> HCHO [label = "hv (J4507)"];
ISOPDO2 -> HCHO [label = " (G4524)"];
ISOPDO2 -> HCHO [label = "NO (G4526)"];
ISOPDO2 -> HCHO [label = "NO3 (G4527)"];
ISOPDOOH -> HCHO [label = "hv (J4506)"];
LC4H9NO3 -> CO2 [label = "OH (G4417)"];
LC4H9NO3 -> CO2 [label = "hv (J4406)"];
LC4H9O2 -> CO2 [label = " (G4401)"];
LC4H9O2 -> CO2 [label = "NO (G4403)"];
LC4H9OOH -> CO2 [label = "OH (G4404)"];
LC4H9OOH -> CO2 [label = "hv (J4400)"];
LC5PAN1719 -> CO [label = "OH (G4559)"];
LC5PAN1719 -> CO [label = "hv (J4514)"];
LHC4ACCHO -> CO [label = "O3 (G4544)"];
LHC4ACCHO -> CO [label = "hv (J4511)"];
LHC4ACCHO -> HCHO [label = "O3 (G4544)"];
LHC4ACCO2H -> CO [label = "OH (G4556)"];
LHC4ACCO2H -> CO2 [label = "OH (G4556)"];
LHC4ACCO3 -> CO [label = " (G4551)"];
LHC4ACCO3 -> CO [label = "NO (G4553)"];
LHC4ACCO3 -> CO [label = "NO3 (G4555)"];
LHC4ACCO3 -> CO2 [label = " (G4551)"];
LHC4ACCO3 -> CO2 [label = "NO (G4553)"];
LHC4ACCO3 -> CO2 [label = "NO3 (G4555)"];
LHC4ACCO3H -> CO [label = "hv (J4513)"];
LHC4ACCO3H -> CO2 [label = "hv (J4513)"];
LHMVKABO2 -> HCHO [label = " (G4437)"];
LHMVKABO2 -> HCHO [label = "NO (G4439)"];
LHMVKABO2 -> HCHO [label = "NO3 (G4440)"];
LHMVKABOOH -> HCHO [label = "hv (J4416)"];
LMEKO2 -> CO2 [label = " (G4420)"];
LMEKO2 -> CO2 [label = "NO (G4415)"];
LMEKO2 -> HCHO [label = " (G4420)"];
LMEKO2 -> HCHO [label = "NO (G4415)"];
LMEKOOH -> CO2 [label = "OH (G4416)"];
LMEKOOH -> CO2 [label = "hv (J4404)"];
LMEKOOH -> HCHO [label = "hv (J4404)"];
LMVKOHABO2 -> HCHO [label = " (G4444)"];
LMVKOHABO2 -> HCHO [label = "NO (G4446)"];
LMVKOHABO2 -> HCHO [label = "NO3 (G4447)"];
LMVKOHABOOH -> HCHO [label = "hv (J4408)"];
LNISO3 -> CO [label = "NO (G4540)"];
LNISO3 -> CO [label = "NO3 (G4541)"];
LNISO3 -> CO2 [label = "NO (G4540)"];
LNISO3 -> CO2 [label = "NO3 (G4541)"];
LNISOOH -> CO [label = "hv (J4510)"];
LNISOOH -> CO2 [label = "hv (J4510)"];
MACO2H -> CO2 [label = "OH (G4435)"];
MACO2H -> HCHO [label = "OH (G4435)"];
MACO3 -> CO2 [label = " (G4424)"];
MACO3 -> CO2 [label = "NO (G4426)"];
MACO3 -> CO2 [label = "NO3 (G4428)"];
MACO3 -> HCHO [label = " (G4424)"];
MACO3 -> HCHO [label = "NO (G4426)"];
MACO3 -> HCHO [label = "NO3 (G4428)"];
MACO3H -> CO2 [label = "hv (J4415)"];
MACO3H -> HCHO [label = "hv (J4415)"];
MACR -> CO [label = "O3 (G4422)"];
MACR -> CO [label = "hv (J4411)"];
MACR -> HCHO [label = "O3 (G4422)"];
MACR -> HCHO [label = "hv (J4411)"];
MACR -> HCOOH [label = "O3 (G4422)"];
MACRO2 -> HCHO [label = " (G4429)"];
MACRO2 -> HCHO [label = "NO (G4431)"];
MACRO2 -> HCHO [label = "NO3 (G4432)"];
MACROH -> CO [label = "hv (J4414)"];
MACROH -> HCHO [label = "OH (G4434)"];
MACROOH -> CO [label = "hv (J4413)"];
MACROOH -> HCHO [label = "hv (J4412)"];
MGLYOX -> CO [label = "NO3 (G4331)"];
MGLYOX -> CO [label = "OH (G4317)"];
MGLYOX -> CO [label = "hv (J4303)"];
MPAN -> CO [label = "OH (G4418)"];
MVK -> CO [label = "O3 (G4405)"];
MVK -> CO [label = "hv (J4401)"];
MVK -> CO2 [label = "O3 (G4405)"];
MVK -> HCHO [label = "O3 (G4405)"];
MVK -> HCHO [label = "hv (J4401)"];
MVK -> HCOOH [label = "O3 (G4405)"];
MVK -> LCARBON [label = "O3 (G4405)"];
MVKOH -> CO [label = "O3 (G4443)"];
MVKOH -> CO [label = "hv (J4417)"];
MVKOH -> CO2 [label = "O3 (G4443)"];
MVKOH -> HCHO [label = "O3 (G4443)"];
MVKOH -> HCHO [label = "hv (J4417)"];
MVKOH -> HCOOH [label = "O3 (G4443)"];
MVKOH -> LCARBON [label = "hv (J4417)"];
NC4CHO -> CO [label = "O3 (G4537)"];
NC4CHO -> CO [label = "hv (J4509)"];
NOA -> HCHO [label = "hv (J4307)"];
PAN -> CO [label = "OH (G4220)"];
PAN -> HCHO [label = "OH (G4220)"];
PHAN -> CO [label = "OH (G4233)"];
PHAN -> HCHO [label = "OH (G4233)"];
}
