# Supplementary material for: The atmospheric chemistry box model CAABA/MECCA-3.0
Source: Copernicus journal article supplement (doi:10.5194/gmd-4-373-2011), 2011-05-06
Supplement: Supplementary file 9 [file gmd-4-373-2011-supplement.zip › caaba_3.0/mecca/graphviz/C2.dot]

// Created automatically by xgraphviz, DO NOT EDIT!
digraph C2 {
  concentrate=true;
  rankdir=LR;
  size="8,8";
"C2\nchemistry"
  [shape=box, fontsize=30,
  style="filled", color=red];
subgraph species {
node[shape=oval,
  color=yellow,
  style="filled"];
C2H2
C2H4
C2H5O2
C2H5OOH
C2H6
CH3CHO
CH3CO2H
CH3CO3
CH3CO3H
DMS
DMSO
ETHGLY
ETHOHNO3
GLYOX
HCOCO2H
HCOCO3
HCOCO3H
HOCH2CH2O
HOCH2CH2O2
HOCH2CHO
HOCH2CO2H
HOCH2CO3
HOCH2CO3H
HYETHO2H
PAN
PHAN
}
ACETOL -> CH3CO3 [label = "hv (J4302)"];
BIACET -> CH3CO3 [label = "hv (J4405)"];
BIACETOH -> CH3CO3 [label = "hv (J4420)"];
BIACETOH -> HOCH2CO3 [label = "hv (J4420)"];
C2H2 -> CH3O2 [label = "Br (G7406)"];
C2H2 -> CH3O2 [label = "Cl (G6411)"];
C2H2 -> CO [label = "OH (G4222)"];
C2H2 -> GLYOX [label = "OH (G4222)"];
C2H2 -> HCOOH [label = "OH (G4222)"];
C2H4 -> CO [label = "O3 (G4201)"];
C2H4 -> HCHO [label = "O3 (G4201)"];
C2H4 -> HCOOH [label = "O3 (G4201)"];
C2H4 -> HOCH2CH2O2 [label = "Br (G7404)"];
C2H4 -> HOCH2CH2O2 [label = "Cl (G6409)"];
C2H4 -> HOCH2CH2O2 [label = "OH (G4202)"];
C2H5O2 -> C2H5OOH [label = "HO2 (G4203)"];
C2H5O2 -> CH3CHO [label = " (G4206)"];
C2H5O2 -> CH3CHO [label = "NO (G4204)"];
C2H5O2 -> CH3CHO [label = "NO3 (G4205)"];
C2H5O2 -> HOCH2CH2O2 [label = " (G4206)"];
C2H5OOH -> C2H5O2 [label = "OH (G4207)"];
C2H5OOH -> CH3CHO [label = "OH (G4207)"];
C2H5OOH -> CH3CHO [label = "hv (J4200)"];
C2H6 -> C2H5O2 [label = "OH (G4200)"];
C2H6 -> CH3O2 [label = "Cl (G6412)"];
C3H6 -> CH3CHO [label = "O3 (G4301)"];
C3H6 -> CH3CO2H [label = "O3 (G4301)"];
C3H8 -> C2H5O2 [label = "OH (G4300)"];
C59O2 -> HOCH2CO3 [label = " (G4561)"];
C59O2 -> HOCH2CO3 [label = "NO (G4563)"];
C59O2 -> HOCH2CO3 [label = "NO3 (G4564)"];
C59OOH -> HOCH2CO3 [label = "hv (J4516)"];
C5H8 -> CH3CO3 [label = "O3 (G4500)"];
CH3CHO -> CH3CO3 [label = "Br (G7405)"];
CH3CHO -> CH3CO3 [label = "Cl (G6410)"];
CH3CHO -> CH3CO3 [label = "NO3 (G4209)"];
CH3CHO -> CH3CO3 [label = "OH (G4208)"];
CH3CHO -> CH3O2 [label = "hv (J4201)"];
CH3CHO -> CO [label = "hv (J4201)"];
CH3CO2H -> CH3O2 [label = "OH (G4210)"];
CH3CO2H -> CO2 [label = "OH (G4210)"];
CH3CO3 -> CH3CO2H [label = " (G4217)"];
CH3CO3 -> CH3CO2H [label = "HO2 (G4211b)"];
CH3CO3 -> CH3CO3H [label = "HO2 (G4211a)"];
CH3CO3 -> CH3O2 [label = " (G4217)"];
CH3CO3 -> CH3O2 [label = "NO (G4212)"];
CH3CO3 -> CH3O2 [label = "NO3 (G4214)"];
CH3CO3 -> CO2 [label = " (G4217)"];
CH3CO3 -> CO2 [label = "NO (G4212)"];
CH3CO3 -> CO2 [label = "NO3 (G4214)"];
CH3CO3 -> PAN [label = "NO2 (G4213)"];
CH3CO3H -> CH3CO3 [label = "OH (G4218)"];
CH3CO3H -> CH3O2 [label = "hv (J4202)"];
CH3CO3H -> CO2 [label = "hv (J4202)"];
CH3COCH2O2 -> CH3CO3 [label = " (G4314)"];
CH3COCH2O2 -> CH3CO3 [label = "NO (G4313)"];
CH3COCH2O2 -> CH3CO3 [label = "NO3 (G4321)"];
CH3COCH3 -> CH3CO3 [label = "hv (J4301)"];
CO2H3CO3H -> CH3CO3 [label = "hv (J4410)"];
CO2H3CO3H -> HCOCO3H [label = "hv (J4410)"];
DMS -> CH3SO2 [label = "Br (G9700)"];
DMS -> CH3SO2 [label = "Cl (G9600)"];
DMS -> CH3SO2 [label = "NO3 (G9401)"];
DMS -> CH3SO2 [label = "OH (G9400a)"];
DMS -> DMSO [label = "BrO (G9701)"];
DMS -> DMSO [label = "IO (G9800)"];
DMS -> DMSO [label = "OH (G9400b)"];
DMS -> HCHO [label = "Br (G9700)"];
DMS -> HCHO [label = "Cl (G9600)"];
DMS -> HCHO [label = "NO3 (G9401)"];
DMS -> HCHO [label = "OH (G9400a)"];
DMSO -> CH3O2 [label = "OH (G9402)"];
DMSO -> CH3SO3H [label = "OH (G9402)"];
DMSO -> HCHO [label = "OH (G9402)"];
ETHGLY -> HOCH2CHO [label = "OH (G4248)"];
ETHOHNO3 -> HCHO [label = "hv (J4212)"];
ETHOHNO3 -> HOCH2CHO [label = "OH (G4245)"];
GLYOX -> CO [label = "NO3 (G4235)"];
GLYOX -> CO [label = "OH (G4234)"];
GLYOX -> CO [label = "hv (J4208)"];
GLYOX -> HCOCO3 [label = "NO3 (G4235)"];
GLYOX -> HCOCO3 [label = "OH (G4234)"];
HCOC5 -> CH3CO3 [label = "hv (J4515)"];
HCOC5 -> HOCH2CO3 [label = "hv (J4515)"];
HCOCO2H -> CO [label = "OH (G4240)"];
HCOCO2H -> CO [label = "hv (J4209)"];
HCOCO2H -> CO2 [label = "OH (G4240)"];
HCOCO2H -> CO2 [label = "hv (J4209)"];
HCOCO3 -> CO [label = " (G4236)"];
HCOCO3 -> CO [label = "NO (G4238)"];
HCOCO3 -> CO [label = "NO3 (G4239)"];
HCOCO3 -> CO2 [label = " (G4236)"];
HCOCO3 -> CO2 [label = "NO (G4238)"];
HCOCO3 -> CO2 [label = "NO3 (G4239)"];
HCOCO3 -> HCOCO2H [label = " (G4236)"];
HCOCO3 -> HCOCO2H [label = "HO2 (G4237)"];
HCOCO3 -> HCOCO3H [label = "HO2 (G4237)"];
HCOCO3H -> CO [label = "hv (J4210)"];
HCOCO3H -> CO2 [label = "hv (J4210)"];
HCOCO3H -> HCOCO3 [label = "OH (G4241)"];
HO12CO3C4 -> CH3CO3 [label = "hv (J4419)"];
HO12CO3C4 -> HOCH2CHO [label = "hv (J4419)"];
HOCH2CH2O -> HCHO [label = " (G4247b)"];
HOCH2CH2O -> HOCH2CHO [label = " (G4247a)"];
HOCH2CH2O2 -> ETHGLY [label = " (G4242)"];
HOCH2CH2O2 -> ETHOHNO3 [label = "NO (G4243)"];
HOCH2CH2O2 -> HCHO [label = "NO (G4243)"];
HOCH2CH2O2 -> HOCH2CH2O [label = " (G4242)"];
HOCH2CH2O2 -> HOCH2CH2O [label = "NO (G4243)"];
HOCH2CH2O2 -> HOCH2CHO [label = " (G4242)"];
HOCH2CH2O2 -> HYETHO2H [label = "HO2 (G4244)"];
HOCH2CHO -> CO [label = "hv (J4205)"];
HOCH2CHO -> GLYOX [label = "OH (G4223)"];
HOCH2CHO -> HCHO [label = "hv (J4205)"];
HOCH2CHO -> HOCH2CO3 [label = "NO3 (G4224)"];
HOCH2CHO -> HOCH2CO3 [label = "OH (G4223)"];
HOCH2CO2H -> CO2 [label = "OH (G4230)"];
HOCH2CO2H -> HCHO [label = "OH (G4230)"];
HOCH2CO3 -> CO2 [label = " (G4225)"];
HOCH2CO3 -> CO2 [label = "NO (G4227)"];
HOCH2CO3 -> CO2 [label = "NO3 (G4229)"];
HOCH2CO3 -> HCHO [label = " (G4225)"];
HOCH2CO3 -> HCHO [label = "NO (G4227)"];
HOCH2CO3 -> HCHO [label = "NO3 (G4229)"];
HOCH2CO3 -> HOCH2CO2H [label = " (G4225)"];
HOCH2CO3 -> HOCH2CO2H [label = "HO2 (G4226)"];
HOCH2CO3 -> HOCH2CO3H [label = "HO2 (G4226)"];
HOCH2CO3 -> PHAN [label = "NO2 (G4228)"];
HOCH2CO3H -> CO2 [label = "hv (J4206)"];
HOCH2CO3H -> HCHO [label = "hv (J4206)"];
HOCH2CO3H -> HOCH2CO3 [label = "OH (G4231)"];
HOCH2COCHO -> HOCH2CO3 [label = "NO3 (G4334)"];
HOCH2COCHO -> HOCH2CO3 [label = "OH (G4333)"];
HOCH2COCHO -> HOCH2CO3 [label = "hv (J4311)"];
HOCH2COCO2H -> HOCH2CO3 [label = "OH (G4335)"];
HOCH2COCO2H -> HOCH2CO3 [label = "hv (J4308)"];
HYETHO2H -> HOCH2CH2O [label = "hv (J4211)"];
HYETHO2H -> HOCH2CH2O2 [label = "OH (G4246a)"];
HYETHO2H -> HOCH2CHO [label = "OH (G4246b)"];
HYPERACET -> CH3CO3 [label = "hv (J4304)"];
HYPROPO2 -> CH3CHO [label = " (G4322)"];
HYPROPO2 -> CH3CHO [label = "NO (G4324)"];
HYPROPO2 -> CH3CHO [label = "NO3 (G4325)"];
HYPROPO2H -> CH3CHO [label = "hv (J4309)"];
LC4H9NO3 -> C2H5O2 [label = "OH (G4417)"];
LC4H9NO3 -> C2H5O2 [label = "hv (J4406)"];
LC4H9NO3 -> CH3CHO [label = "hv (J4406)"];
LC4H9O2 -> C2H5O2 [label = " (G4401)"];
LC4H9O2 -> C2H5O2 [label = "NO (G4403)"];
LC4H9O2 -> CH3CHO [label = " (G4401)"];
LC4H9O2 -> CH3CHO [label = "NO (G4403)"];
LC4H9OOH -> C2H5O2 [label = "OH (G4404)"];
LC4H9OOH -> C2H5O2 [label = "hv (J4400)"];
LC4H9OOH -> CH3CHO [label = "hv (J4400)"];
LC578O2 -> GLYOX [label = " (G4546)"];
LC578O2 -> GLYOX [label = "NO (G4548)"];
LC578O2 -> GLYOX [label = "NO3 (G4549)"];
LC578O2 -> HOCH2CHO [label = " (G4546)"];
LC578O2 -> HOCH2CHO [label = "NO (G4548)"];
LC578O2 -> HOCH2CHO [label = "NO3 (G4549)"];
LC578OOH -> GLYOX [label = "hv (J4512)"];
LC578OOH -> HOCH2CHO [label = "hv (J4512)"];
LHC4ACCHO -> CH3CO3 [label = "O3 (G4544)"];
LHC4ACCHO -> CH3CO3 [label = "hv (J4511)"];
LHC4ACCHO -> GLYOX [label = "O3 (G4544)"];
LHC4ACCHO -> HCOCO2H [label = "O3 (G4544)"];
LHC4ACCHO -> HOCH2CHO [label = "O3 (G4544)"];
LHC4ACCHO -> HOCH2CHO [label = "hv (J4511)"];
LHC4ACCHO -> HOCH2CO2H [label = "O3 (G4544)"];
LHC4ACCO2H -> CH3CO3 [label = "OH (G4556)"];
LHC4ACCO2H -> HOCH2CHO [label = "OH (G4556)"];
LHC4ACCO3 -> CH3CO3 [label = " (G4551)"];
LHC4ACCO3 -> CH3CO3 [label = "NO (G4553)"];
LHC4ACCO3 -> CH3CO3 [label = "NO3 (G4555)"];
LHC4ACCO3 -> HOCH2CHO [label = " (G4551)"];
LHC4ACCO3 -> HOCH2CHO [label = "NO (G4553)"];
LHC4ACCO3 -> HOCH2CHO [label = "NO3 (G4555)"];
LHC4ACCO3H -> CH3CO3 [label = "hv (J4513)"];
LHC4ACCO3H -> HOCH2CHO [label = "hv (J4513)"];
LHMVKABO2 -> CH3CO3 [label = " (G4437)"];
LHMVKABO2 -> CH3CO3 [label = "NO (G4439)"];
LHMVKABO2 -> CH3CO3 [label = "NO3 (G4440)"];
LHMVKABO2 -> HOCH2CHO [label = " (G4437)"];
LHMVKABO2 -> HOCH2CHO [label = "NO (G4439)"];
LHMVKABO2 -> HOCH2CHO [label = "NO3 (G4440)"];
LHMVKABOOH -> CH3CO3 [label = "hv (J4416)"];
LHMVKABOOH -> HOCH2CHO [label = "hv (J4416)"];
LMEKO2 -> C2H5O2 [label = " (G4420)"];
LMEKO2 -> C2H5O2 [label = "NO (G4415)"];
LMEKO2 -> CH3CHO [label = " (G4420)"];
LMEKO2 -> CH3CHO [label = "NO (G4415)"];
LMEKO2 -> CH3CO3 [label = " (G4420)"];
LMEKO2 -> CH3CO3 [label = "NO (G4415)"];
LMEKO2 -> HOCH2CH2O2 [label = " (G4420)"];
LMEKO2 -> HOCH2CH2O2 [label = "NO (G4415)"];
LMEKOOH -> C2H5O2 [label = "OH (G4416)"];
LMEKOOH -> C2H5O2 [label = "hv (J4404)"];
LMEKOOH -> CH3CHO [label = "hv (J4404)"];
LMEKOOH -> CH3CO3 [label = "hv (J4404)"];
LMEKOOH -> HOCH2CH2O2 [label = "hv (J4404)"];
LMVKOHABO2 -> HOCH2CHO [label = " (G4444)"];
LMVKOHABO2 -> HOCH2CHO [label = "NO (G4446)"];
LMVKOHABO2 -> HOCH2CHO [label = "NO3 (G4447)"];
LMVKOHABO2 -> HOCH2CO3 [label = " (G4444)"];
LMVKOHABO2 -> HOCH2CO3 [label = "NO (G4446)"];
LMVKOHABO2 -> HOCH2CO3 [label = "NO3 (G4447)"];
LMVKOHABOOH -> HOCH2CHO [label = "hv (J4408)"];
LMVKOHABOOH -> HOCH2CO3 [label = "hv (J4408)"];
LNISO3 -> GLYOX [label = "NO (G4540)"];
LNISO3 -> GLYOX [label = "NO3 (G4541)"];
LNISOOH -> GLYOX [label = "hv (J4510)"];
MACO2H -> CH3CO3 [label = "OH (G4435)"];
MACO3 -> CH3CO3 [label = " (G4424)"];
MACO3 -> CH3CO3 [label = "NO (G4426)"];
MACO3 -> CH3CO3 [label = "NO3 (G4428)"];
MACO3H -> CH3CO3 [label = "hv (J4415)"];
MACR -> CH3CO3 [label = "O3 (G4422)"];
MACR -> CH3CO3 [label = "hv (J4411)"];
MEK -> C2H5O2 [label = "hv (J4403)"];
MEK -> CH3CO3 [label = "hv (J4403)"];
MGLYOX -> CH3CO3 [label = "NO3 (G4331)"];
MGLYOX -> CH3CO3 [label = "OH (G4317)"];
MGLYOX -> CH3CO3 [label = "hv (J4303)"];
MVK -> CH3CHO [label = "O3 (G4405)"];
MVK -> CH3CO3 [label = "O3 (G4405)"];
MVK -> CH3CO3 [label = "hv (J4401)"];
MVKOH -> HOCH2CHO [label = "O3 (G4443)"];
MVKOH -> HOCH2CO3 [label = "O3 (G4443)"];
MVKOH -> HOCH2CO3 [label = "hv (J4417)"];
NC4CHO -> GLYOX [label = "O3 (G4537)"];
NC4CHO -> HCOCO2H [label = "O3 (G4537)"];
NOA -> CH3CO3 [label = "hv (J4307)"];
PAN -> CH3CO3 [label = " (G4221)"];
PAN -> CH3CO3 [label = "hv (J4204)"];
PAN -> CO [label = "OH (G4220)"];
PAN -> HCHO [label = "OH (G4220)"];
PHAN -> CO [label = "OH (G4233)"];
PHAN -> HCHO [label = "OH (G4233)"];
PHAN -> HOCH2CO3 [label = " (G4232)"];
PHAN -> HOCH2CO3 [label = "hv (J4207)"];
}
