# Supplementary material for: The atmospheric chemistry box model CAABA/MECCA-3.0
Source: Copernicus journal article supplement (doi:10.5194/gmd-4-373-2011), 2011-05-06
Supplement: Supplementary file 9 [file gmd-4-373-2011-supplement.zip › caaba_3.0/mecca/graphviz/C3.dot]

// Created automatically by xgraphviz, DO NOT EDIT!
digraph C3 {
  concentrate=true;
  rankdir=LR;
  size="8,8";
"C3\nchemistry"
  [shape=box, fontsize=30,
  style="filled", color=red];
subgraph species {
node[shape=oval,
  color=yellow,
  style="filled"];
ACETOL
C3H6
C3H7I
C3H8
CH3COCH2O2
CH3COCH3
HOCH2COCHO
HOCH2COCO2H
HYPERACET
HYPROPO2
HYPROPO2H
IC3H7NO3
IC3H7O2
IC3H7OOH
MGLYOX
NOA
PR2O2HNO3
PRONO3BO2
}
ACETOL -> CH3CO3 [label = "hv (J4302)"];
ACETOL -> HCHO [label = "hv (J4302)"];
ACETOL -> MGLYOX [label = "OH (G4316)"];
C3H6 -> CH3CHO [label = "O3 (G4301)"];
C3H6 -> CH3CO2H [label = "O3 (G4301)"];
C3H6 -> CH3O2 [label = "O3 (G4301)"];
C3H6 -> CH4 [label = "O3 (G4301)"];
C3H6 -> CO [label = "O3 (G4301)"];
C3H6 -> CO2 [label = "O3 (G4301)"];
C3H6 -> HCHO [label = "O3 (G4301)"];
C3H6 -> HCOOH [label = "O3 (G4301)"];
C3H6 -> HYPROPO2 [label = "OH (G4302)"];
C3H6 -> PRONO3BO2 [label = "NO3 (G4303)"];
C3H7I -> CH3O2 [label = "OH (G8400)"];
C3H7I -> CH3O2 [label = "hv (J8402)"];
C3H8 -> C2H5O2 [label = "OH (G4300)"];
C3H8 -> CO2 [label = "OH (G4300)"];
C3H8 -> IC3H7O2 [label = "OH (G4300)"];
C59O2 -> ACETOL [label = " (G4561)"];
C59O2 -> ACETOL [label = "NO (G4563)"];
C59O2 -> ACETOL [label = "NO3 (G4564)"];
C59OOH -> ACETOL [label = "hv (J4516)"];
C5H8 -> C3H6 [label = "O3 (G4500)"];
CH3COCH2O2 -> ACETOL [label = " (G4314)"];
CH3COCH2O2 -> CH3CO3 [label = " (G4314)"];
CH3COCH2O2 -> CH3CO3 [label = "NO (G4313)"];
CH3COCH2O2 -> CH3CO3 [label = "NO3 (G4321)"];
CH3COCH2O2 -> HCHO [label = " (G4314)"];
CH3COCH2O2 -> HCHO [label = "NO (G4313)"];
CH3COCH2O2 -> HCHO [label = "NO3 (G4321)"];
CH3COCH2O2 -> HYPERACET [label = "HO2 (G4312)"];
CH3COCH2O2 -> MGLYOX [label = " (G4314)"];
CH3COCH3 -> CH3CO3 [label = "hv (J4301)"];
CH3COCH3 -> CH3COCH2O2 [label = "OH (G4311)"];
CH3COCH3 -> CH3O2 [label = "hv (J4301)"];
CO2H3CHO -> MGLYOX [label = "hv (J4418)"];
CO2H3CO3 -> MGLYOX [label = " (G4451)"];
CO2H3CO3 -> MGLYOX [label = "NO (G4453)"];
CO2H3CO3 -> MGLYOX [label = "NO3 (G4454)"];
CO2H3CO3H -> MGLYOX [label = "hv (J4409)"];
HOCH2COCHO -> CO [label = "NO3 (G4334)"];
HOCH2COCHO -> CO [label = "OH (G4333)"];
HOCH2COCHO -> CO [label = "hv (J4311)"];
HOCH2COCHO -> HOCH2CO3 [label = "NO3 (G4334)"];
HOCH2COCHO -> HOCH2CO3 [label = "OH (G4333)"];
HOCH2COCHO -> HOCH2CO3 [label = "hv (J4311)"];
HOCH2COCO2H -> CO2 [label = "OH (G4335)"];
HOCH2COCO2H -> CO2 [label = "hv (J4308)"];
HOCH2COCO2H -> HOCH2CO3 [label = "OH (G4335)"];
HOCH2COCO2H -> HOCH2CO3 [label = "hv (J4308)"];
HYPERACET -> CH3CO3 [label = "hv (J4304)"];
HYPERACET -> CH3COCH2O2 [label = "OH (G4315a)"];
HYPERACET -> HCHO [label = "hv (J4304)"];
HYPERACET -> MGLYOX [label = "OH (G4315b)"];
HYPROPO2 -> CH3CHO [label = " (G4322)"];
HYPROPO2 -> CH3CHO [label = "NO (G4324)"];
HYPROPO2 -> CH3CHO [label = "NO3 (G4325)"];
HYPROPO2 -> HCHO [label = " (G4322)"];
HYPROPO2 -> HCHO [label = "NO (G4324)"];
HYPROPO2 -> HCHO [label = "NO3 (G4325)"];
HYPROPO2 -> HYPROPO2H [label = "HO2 (G4323)"];
HYPROPO2H -> ACETOL [label = "OH (G4326b)"];
HYPROPO2H -> CH3CHO [label = "hv (J4309)"];
HYPROPO2H -> HCHO [label = "hv (J4309)"];
HYPROPO2H -> HYPROPO2 [label = "OH (G4326a)"];
IC3H7NO3 -> CH3COCH3 [label = "OH (G4320)"];
IC3H7NO3 -> CH3COCH3 [label = "hv (J4306)"];
IC3H7O2 -> CH3COCH3 [label = " (G4306)"];
IC3H7O2 -> CH3COCH3 [label = "NO (G4305)"];
IC3H7O2 -> IC3H7NO3 [label = "NO (G4305)"];
IC3H7O2 -> IC3H7OOH [label = "HO2 (G4304)"];
IC3H7OOH -> CH3COCH3 [label = "OH (G4307)"];
IC3H7OOH -> CH3COCH3 [label = "hv (J4300)"];
IC3H7OOH -> IC3H7O2 [label = "OH (G4307)"];
LC578O2 -> ACETOL [label = " (G4546)"];
LC578O2 -> ACETOL [label = "NO (G4548)"];
LC578O2 -> ACETOL [label = "NO3 (G4549)"];
LC578O2 -> MGLYOX [label = " (G4546)"];
LC578O2 -> MGLYOX [label = "NO (G4548)"];
LC578O2 -> MGLYOX [label = "NO3 (G4549)"];
LC578OOH -> ACETOL [label = "hv (J4512)"];
LC578OOH -> MGLYOX [label = "hv (J4512)"];
LHC4ACCHO -> ACETOL [label = "O3 (G4544)"];
LHC4ACCHO -> ACETOL [label = "hv (J4511)"];
LHC4ACCHO -> MGLYOX [label = "O3 (G4544)"];
LHC4ACCO2H -> ACETOL [label = "OH (G4556)"];
LHC4ACCO3 -> ACETOL [label = " (G4551)"];
LHC4ACCO3 -> ACETOL [label = "NO (G4553)"];
LHC4ACCO3 -> ACETOL [label = "NO3 (G4555)"];
LHC4ACCO3H -> ACETOL [label = "hv (J4513)"];
LHMVKABO2 -> MGLYOX [label = " (G4437)"];
LHMVKABO2 -> MGLYOX [label = "NO (G4439)"];
LHMVKABO2 -> MGLYOX [label = "NO3 (G4440)"];
LHMVKABOOH -> MGLYOX [label = "hv (J4416)"];
LMEKOOH -> CH3COCH2O2 [label = "OH (G4416)"];
LMVKOHABO2 -> HOCH2COCHO [label = " (G4444)"];
LMVKOHABO2 -> HOCH2COCHO [label = "NO (G4446)"];
LMVKOHABO2 -> HOCH2COCHO [label = "NO3 (G4447)"];
LMVKOHABOOH -> HOCH2COCHO [label = "hv (J4408)"];
LNISO3 -> NOA [label = "NO (G4540)"];
LNISO3 -> NOA [label = "NO3 (G4541)"];
LNISOOH -> NOA [label = "hv (J4510)"];
MACR -> MGLYOX [label = "O3 (G4422)"];
MACRO2 -> ACETOL [label = " (G4429)"];
MACRO2 -> ACETOL [label = "NO (G4431)"];
MACRO2 -> ACETOL [label = "NO3 (G4432)"];
MACROH -> ACETOL [label = "OH (G4434)"];
MACROH -> ACETOL [label = "hv (J4414)"];
MACROOH -> ACETOL [label = "hv (J4412)"];
MACROOH -> ACETOL [label = "hv (J4413)"];
MGLYOX -> CH3CO3 [label = "NO3 (G4331)"];
MGLYOX -> CH3CO3 [label = "OH (G4317)"];
MGLYOX -> CH3CO3 [label = "hv (J4303)"];
MGLYOX -> CO [label = "NO3 (G4331)"];
MGLYOX -> CO [label = "OH (G4317)"];
MGLYOX -> CO [label = "hv (J4303)"];
MPAN -> ACETOL [label = "OH (G4418)"];
MVK -> C3H6 [label = "hv (J4401)"];
MVK -> MGLYOX [label = "O3 (G4405)"];
MVKOH -> HOCH2COCHO [label = "O3 (G4443)"];
MVKOH -> HOCH2COCO2H [label = "O3 (G4443)"];
NC4CHO -> MGLYOX [label = "O3 (G4537)"];
NC4CHO -> NOA [label = "O3 (G4537)"];
NC4CHO -> NOA [label = "hv (J4509)"];
NOA -> CH3CO3 [label = "hv (J4307)"];
NOA -> HCHO [label = "hv (J4307)"];
NOA -> MGLYOX [label = "OH (G4332)"];
PR2O2HNO3 -> NOA [label = "OH (G4330b)"];
PR2O2HNO3 -> NOA [label = "hv (J4310)"];
PR2O2HNO3 -> PRONO3BO2 [label = "OH (G4330a)"];
PRONO3BO2 -> NOA [label = "NO (G4328)"];
PRONO3BO2 -> NOA [label = "NO3 (G4329)"];
PRONO3BO2 -> PR2O2HNO3 [label = "HO2 (G4327)"];
}
