# Supplementary material for: The atmospheric chemistry box model CAABA/MECCA-3.0
Source: Copernicus journal article supplement (doi:10.5194/gmd-4-373-2011), 2011-05-06
Supplement: Supplementary file 9 [file gmd-4-373-2011-supplement.zip › caaba_3.0/mecca/graphviz/C4.dot]

// Created automatically by xgraphviz, DO NOT EDIT!
digraph C4 {
  concentrate=true;
  rankdir=LR;
  size="8,8";
"C4\nchemistry"
  [shape=box, fontsize=30,
  style="filled", color=red];
subgraph species {
node[shape=oval,
  color=yellow,
  style="filled"];
BIACET
BIACETOH
CO2H3CHO
CO2H3CO3
CO2H3CO3H
HO12CO3C4
LC4H9NO3
LC4H9O2
LC4H9OOH
LHMVKABO2
LHMVKABOOH
LMEKO2
LMEKOOH
LMVKOHABO2
LMVKOHABOOH
MACO2H
MACO3
MACO3H
MACR
MACRO2
MACROH
MACROOH
MEK
MPAN
MVK
MVKOH
NC4H10
}
BIACET -> CH3CO3 [label = "hv (J4405)"];
BIACETOH -> CH3CO3 [label = "hv (J4420)"];
BIACETOH -> HOCH2CO3 [label = "hv (J4420)"];
C5H8 -> LHMVKABO2 [label = "O3 (G4500)"];
C5H8 -> MACO2H [label = "O3 (G4500)"];
C5H8 -> MACR [label = "O3 (G4500)"];
C5H8 -> MVK [label = "O3 (G4500)"];
CO2H3CHO -> CO [label = "hv (J4418)"];
CO2H3CHO -> CO2H3CO3 [label = "NO3 (G4450)"];
CO2H3CHO -> CO2H3CO3 [label = "OH (G4449)"];
CO2H3CHO -> MGLYOX [label = "hv (J4418)"];
CO2H3CO3 -> CO2 [label = " (G4451)"];
CO2H3CO3 -> CO2 [label = "NO (G4453)"];
CO2H3CO3 -> CO2 [label = "NO3 (G4454)"];
CO2H3CO3 -> CO2H3CO3H [label = "HO2 (G4452)"];
CO2H3CO3 -> MGLYOX [label = " (G4451)"];
CO2H3CO3 -> MGLYOX [label = "NO (G4453)"];
CO2H3CO3 -> MGLYOX [label = "NO3 (G4454)"];
CO2H3CO3H -> CH3CO3 [label = "hv (J4410)"];
CO2H3CO3H -> CO2 [label = "hv (J4409)"];
CO2H3CO3H -> CO2H3CO3 [label = "OH (G4455)"];
CO2H3CO3H -> HCOCO3H [label = "hv (J4410)"];
CO2H3CO3H -> MGLYOX [label = "hv (J4409)"];
HO12CO3C4 -> BIACETOH [label = "OH (G4456)"];
HO12CO3C4 -> CH3CO3 [label = "hv (J4419)"];
HO12CO3C4 -> HOCH2CHO [label = "hv (J4419)"];
ISOPBNO3 -> MVK [label = "OH (G4523)"];
ISOPBNO3 -> MVK [label = "hv (J4505)"];
ISOPBNO3 -> MVKOH [label = "hv (J4505)"];
ISOPBO2 -> MVK [label = " (G4517)"];
ISOPBO2 -> MVK [label = "NO (G4519)"];
ISOPBO2 -> MVK [label = "NO3 (G4520)"];
ISOPBO2 -> MVKOH [label = " (G4517)"];
ISOPBO2 -> MVKOH [label = "NO (G4519)"];
ISOPBO2 -> MVKOH [label = "NO3 (G4520)"];
ISOPBOH -> MVK [label = "OH (G4522)"];
ISOPBOH -> MVKOH [label = "OH (G4522)"];
ISOPBOOH -> MVK [label = "hv (J4504)"];
ISOPBOOH -> MVKOH [label = "hv (J4504)"];
ISOPDNO3 -> MACR [label = "hv (J4507)"];
ISOPDO2 -> MACR [label = " (G4524)"];
ISOPDO2 -> MACR [label = "NO (G4526)"];
ISOPDO2 -> MACR [label = "NO3 (G4527)"];
ISOPDOOH -> MACR [label = "hv (J4506)"];
LC4H9NO3 -> C2H5O2 [label = "OH (G4417)"];
LC4H9NO3 -> C2H5O2 [label = "hv (J4406)"];
LC4H9NO3 -> CH3CHO [label = "hv (J4406)"];
LC4H9NO3 -> CO2 [label = "OH (G4417)"];
LC4H9NO3 -> CO2 [label = "hv (J4406)"];
LC4H9NO3 -> MEK [label = "OH (G4417)"];
LC4H9NO3 -> MEK [label = "hv (J4406)"];
LC4H9O2 -> C2H5O2 [label = " (G4401)"];
LC4H9O2 -> C2H5O2 [label = "NO (G4403)"];
LC4H9O2 -> CH3CHO [label = " (G4401)"];
LC4H9O2 -> CH3CHO [label = "NO (G4403)"];
LC4H9O2 -> CO2 [label = " (G4401)"];
LC4H9O2 -> CO2 [label = "NO (G4403)"];
LC4H9O2 -> LC4H9NO3 [label = "NO (G4403)"];
LC4H9O2 -> LC4H9OOH [label = "HO2 (G4402)"];
LC4H9O2 -> MEK [label = " (G4401)"];
LC4H9O2 -> MEK [label = "NO (G4403)"];
LC4H9OOH -> C2H5O2 [label = "OH (G4404)"];
LC4H9OOH -> C2H5O2 [label = "hv (J4400)"];
LC4H9OOH -> CH3CHO [label = "hv (J4400)"];
LC4H9OOH -> CO2 [label = "OH (G4404)"];
LC4H9OOH -> CO2 [label = "hv (J4400)"];
LC4H9OOH -> LC4H9O2 [label = "OH (G4404)"];
LC4H9OOH -> MEK [label = "OH (G4404)"];
LC4H9OOH -> MEK [label = "hv (J4400)"];
LC5PAN1719 -> HO12CO3C4 [label = "OH (G4559)"];
LC5PAN1719 -> HO12CO3C4 [label = "hv (J4514)"];
LC5PAN1719 -> MACROH [label = "OH (G4559)"];
LC5PAN1719 -> MACROH [label = "hv (J4514)"];
LHMVKABO2 -> BIACETOH [label = " (G4437)"];
LHMVKABO2 -> CH3CO3 [label = " (G4437)"];
LHMVKABO2 -> CH3CO3 [label = "NO (G4439)"];
LHMVKABO2 -> CH3CO3 [label = "NO3 (G4440)"];
LHMVKABO2 -> CO2H3CHO [label = " (G4437)"];
LHMVKABO2 -> HCHO [label = " (G4437)"];
LHMVKABO2 -> HCHO [label = "NO (G4439)"];
LHMVKABO2 -> HCHO [label = "NO3 (G4440)"];
LHMVKABO2 -> HO12CO3C4 [label = " (G4437)"];
LHMVKABO2 -> HOCH2CHO [label = " (G4437)"];
LHMVKABO2 -> HOCH2CHO [label = "NO (G4439)"];
LHMVKABO2 -> HOCH2CHO [label = "NO3 (G4440)"];
LHMVKABO2 -> LHMVKABOOH [label = "HO2 (G4438)"];
LHMVKABO2 -> MGLYOX [label = " (G4437)"];
LHMVKABO2 -> MGLYOX [label = "NO (G4439)"];
LHMVKABO2 -> MGLYOX [label = "NO3 (G4440)"];
LHMVKABOOH -> BIACETOH [label = "OH (G4441)"];
LHMVKABOOH -> CH3CO3 [label = "hv (J4416)"];
LHMVKABOOH -> CO2H3CHO [label = "OH (G4441)"];
LHMVKABOOH -> HCHO [label = "hv (J4416)"];
LHMVKABOOH -> HOCH2CHO [label = "hv (J4416)"];
LHMVKABOOH -> MGLYOX [label = "hv (J4416)"];
LMEKO2 -> C2H5O2 [label = " (G4420)"];
LMEKO2 -> C2H5O2 [label = "NO (G4415)"];
LMEKO2 -> CH3CHO [label = " (G4420)"];
LMEKO2 -> CH3CHO [label = "NO (G4415)"];
LMEKO2 -> CH3CO3 [label = " (G4420)"];
LMEKO2 -> CH3CO3 [label = "NO (G4415)"];
LMEKO2 -> CO2 [label = " (G4420)"];
LMEKO2 -> CO2 [label = "NO (G4415)"];
LMEKO2 -> HCHO [label = " (G4420)"];
LMEKO2 -> HCHO [label = "NO (G4415)"];
LMEKO2 -> HOCH2CH2O2 [label = " (G4420)"];
LMEKO2 -> HOCH2CH2O2 [label = "NO (G4415)"];
LMEKO2 -> LMEKOOH [label = "HO2 (G4414)"];
LMEKOOH -> BIACET [label = "OH (G4416)"];
LMEKOOH -> C2H5O2 [label = "OH (G4416)"];
LMEKOOH -> C2H5O2 [label = "hv (J4404)"];
LMEKOOH -> CH3CHO [label = "hv (J4404)"];
LMEKOOH -> CH3CO3 [label = "hv (J4404)"];
LMEKOOH -> CH3COCH2O2 [label = "OH (G4416)"];
LMEKOOH -> CO2 [label = "OH (G4416)"];
LMEKOOH -> CO2 [label = "hv (J4404)"];
LMEKOOH -> HCHO [label = "hv (J4404)"];
LMEKOOH -> HOCH2CH2O2 [label = "hv (J4404)"];
LMEKOOH -> LMEKO2 [label = "OH (G4416)"];
LMVKOHABO2 -> HCHO [label = " (G4444)"];
LMVKOHABO2 -> HCHO [label = "NO (G4446)"];
LMVKOHABO2 -> HCHO [label = "NO3 (G4447)"];
LMVKOHABO2 -> HOCH2CHO [label = " (G4444)"];
LMVKOHABO2 -> HOCH2CHO [label = "NO (G4446)"];
LMVKOHABO2 -> HOCH2CHO [label = "NO3 (G4447)"];
LMVKOHABO2 -> HOCH2CO3 [label = " (G4444)"];
LMVKOHABO2 -> HOCH2CO3 [label = "NO (G4446)"];
LMVKOHABO2 -> HOCH2CO3 [label = "NO3 (G4447)"];
LMVKOHABO2 -> HOCH2COCHO [label = " (G4444)"];
LMVKOHABO2 -> HOCH2COCHO [label = "NO (G4446)"];
LMVKOHABO2 -> HOCH2COCHO [label = "NO3 (G4447)"];
LMVKOHABO2 -> LMVKOHABOOH [label = "HO2 (G4445)"];
LMVKOHABOOH -> CO2H3CHO [label = "OH (G4448)"];
LMVKOHABOOH -> HCHO [label = "hv (J4408)"];
LMVKOHABOOH -> HO12CO3C4 [label = "OH (G4448)"];
LMVKOHABOOH -> HOCH2CHO [label = "hv (J4408)"];
LMVKOHABOOH -> HOCH2CO3 [label = "hv (J4408)"];
LMVKOHABOOH -> HOCH2COCHO [label = "hv (J4408)"];
MACO2H -> CH3CO3 [label = "OH (G4435)"];
MACO2H -> CO2 [label = "OH (G4435)"];
MACO2H -> HCHO [label = "OH (G4435)"];
MACO3 -> CH3CO3 [label = " (G4424)"];
MACO3 -> CH3CO3 [label = "NO (G4426)"];
MACO3 -> CH3CO3 [label = "NO3 (G4428)"];
MACO3 -> CO2 [label = " (G4424)"];
MACO3 -> CO2 [label = "NO (G4426)"];
MACO3 -> CO2 [label = "NO3 (G4428)"];
MACO3 -> HCHO [label = " (G4424)"];
MACO3 -> HCHO [label = "NO (G4426)"];
MACO3 -> HCHO [label = "NO3 (G4428)"];
MACO3 -> MACO2H [label = " (G4424)"];
MACO3 -> MACO2H [label = "HO2 (G4425)"];
MACO3 -> MACO3H [label = "HO2 (G4425)"];
MACO3 -> MPAN [label = "NO2 (G4427)"];
MACO3H -> CH3CO3 [label = "hv (J4415)"];
MACO3H -> CO2 [label = "hv (J4415)"];
MACO3H -> HCHO [label = "hv (J4415)"];
MACO3H -> MACO3 [label = "OH (G4436)"];
MACR -> CH3CO3 [label = "O3 (G4422)"];
MACR -> CH3CO3 [label = "hv (J4411)"];
MACR -> CO [label = "O3 (G4422)"];
MACR -> CO [label = "hv (J4411)"];
MACR -> HCHO [label = "O3 (G4422)"];
MACR -> HCHO [label = "hv (J4411)"];
MACR -> HCOOH [label = "O3 (G4422)"];
MACR -> MACO3 [label = "NO3 (G4423)"];
MACR -> MACO3 [label = "OH (G4421)"];
MACR -> MACO3 [label = "hv (J4411)"];
MACR -> MACRO2 [label = "OH (G4421)"];
MACR -> MGLYOX [label = "O3 (G4422)"];
MACRO2 -> ACETOL [label = " (G4429)"];
MACRO2 -> ACETOL [label = "NO (G4431)"];
MACRO2 -> ACETOL [label = "NO3 (G4432)"];
MACRO2 -> HCHO [label = " (G4429)"];
MACRO2 -> HCHO [label = "NO (G4431)"];
MACRO2 -> HCHO [label = "NO3 (G4432)"];
MACRO2 -> MACROH [label = " (G4429)"];
MACRO2 -> MACROOH [label = "HO2 (G4430)"];
MACROH -> ACETOL [label = "OH (G4434)"];
MACROH -> ACETOL [label = "hv (J4414)"];
MACROH -> CO [label = "hv (J4414)"];
MACROH -> HCHO [label = "OH (G4434)"];
MACROOH -> ACETOL [label = "hv (J4412)"];
MACROOH -> ACETOL [label = "hv (J4413)"];
MACROOH -> CO [label = "hv (J4413)"];
MACROOH -> HCHO [label = "hv (J4412)"];
MACROOH -> MACRO2 [label = "OH (G4433)"];
MEK -> C2H5O2 [label = "hv (J4403)"];
MEK -> CH3CO3 [label = "hv (J4403)"];
MEK -> LMEKO2 [label = "OH (G4413)"];
MPAN -> ACETOL [label = "OH (G4418)"];
MPAN -> CO [label = "OH (G4418)"];
MPAN -> MACO3 [label = " (G4419)"];
MPAN -> MACO3 [label = "hv (J4407)"];
MVK -> C3H6 [label = "hv (J4401)"];
MVK -> CH3CHO [label = "O3 (G4405)"];
MVK -> CH3CO3 [label = "O3 (G4405)"];
MVK -> CH3CO3 [label = "hv (J4401)"];
MVK -> CO [label = "O3 (G4405)"];
MVK -> CO [label = "hv (J4401)"];
MVK -> CO2 [label = "O3 (G4405)"];
MVK -> HCHO [label = "O3 (G4405)"];
MVK -> HCHO [label = "hv (J4401)"];
MVK -> HCOOH [label = "O3 (G4405)"];
MVK -> LCARBON [label = "O3 (G4405)"];
MVK -> LHMVKABO2 [label = "OH (G4406)"];
MVK -> MGLYOX [label = "O3 (G4405)"];
MVKOH -> CO [label = "O3 (G4443)"];
MVKOH -> CO [label = "hv (J4417)"];
MVKOH -> CO2 [label = "O3 (G4443)"];
MVKOH -> HCHO [label = "O3 (G4443)"];
MVKOH -> HCHO [label = "hv (J4417)"];
MVKOH -> HCOOH [label = "O3 (G4443)"];
MVKOH -> HOCH2CHO [label = "O3 (G4443)"];
MVKOH -> HOCH2CO3 [label = "O3 (G4443)"];
MVKOH -> HOCH2CO3 [label = "hv (J4417)"];
MVKOH -> HOCH2COCHO [label = "O3 (G4443)"];
MVKOH -> HOCH2COCO2H [label = "O3 (G4443)"];
MVKOH -> LCARBON [label = "hv (J4417)"];
MVKOH -> LMVKOHABO2 [label = "OH (G4442)"];
NC4H10 -> LC4H9O2 [label = "OH (G4400)"];
}
