# Supplementary material for: The atmospheric chemistry box model CAABA/MECCA-3.0
Source: Copernicus journal article supplement (doi:10.5194/gmd-4-373-2011), 2011-05-06
Supplement: Supplementary file 9 [file gmd-4-373-2011-supplement.zip › caaba_3.0/mecca/graphviz/C5.dot]

// Created automatically by xgraphviz, DO NOT EDIT!
digraph C5 {
  concentrate=true;
  rankdir=LR;
  size="8,8";
"C5\nchemistry"
  [shape=box, fontsize=30,
  style="filled", color=red];
subgraph species {
node[shape=oval,
  color=yellow,
  style="filled"];
C59O2
C59OOH
C5H8
HCOC5
ISOPAOH
ISOPBNO3
ISOPBO2
ISOPBOH
ISOPBOOH
ISOPDNO3
ISOPDO2
ISOPDOH
ISOPDOOH
LC578O2
LC578OOH
LC5PAN1719
LHC4ACCHO
LHC4ACCO2H
LHC4ACCO3
LHC4ACCO3H
LISOPACNO3
LISOPACO2
LISOPACOOH
LNISO3
LNISOOH
NC4CHO
NISOPO2
NISOPOOH
}
C59O2 -> ACETOL [label = " (G4561)"];
C59O2 -> ACETOL [label = "NO (G4563)"];
C59O2 -> ACETOL [label = "NO3 (G4564)"];
C59O2 -> C59OOH [label = "HO2 (G4562)"];
C59O2 -> HOCH2CO3 [label = " (G4561)"];
C59O2 -> HOCH2CO3 [label = "NO (G4563)"];
C59O2 -> HOCH2CO3 [label = "NO3 (G4564)"];
C59OOH -> ACETOL [label = "hv (J4516)"];
C59OOH -> C59O2 [label = "OH (G4565)"];
C59OOH -> HOCH2CO3 [label = "hv (J4516)"];
C5H8 -> C3H6 [label = "O3 (G4500)"];
C5H8 -> CH3CO3 [label = "O3 (G4500)"];
C5H8 -> CH3O2 [label = "O3 (G4500)"];
C5H8 -> CO [label = "O3 (G4500)"];
C5H8 -> CO2 [label = "O3 (G4500)"];
C5H8 -> HCHO [label = "O3 (G4500)"];
C5H8 -> HCOOH [label = "O3 (G4500)"];
C5H8 -> ISOPBO2 [label = "OH (G4501)"];
C5H8 -> ISOPDO2 [label = "OH (G4501)"];
C5H8 -> LHMVKABO2 [label = "O3 (G4500)"];
C5H8 -> LISOPACO2 [label = "OH (G4501)"];
C5H8 -> MACO2H [label = "O3 (G4500)"];
C5H8 -> MACR [label = "O3 (G4500)"];
C5H8 -> MVK [label = "O3 (G4500)"];
C5H8 -> NISOPO2 [label = "NO3 (G4509)"];
HCOC5 -> C59O2 [label = "OH (G4560)"];
HCOC5 -> CH3CO3 [label = "hv (J4515)"];
HCOC5 -> HCHO [label = "hv (J4515)"];
HCOC5 -> HOCH2CO3 [label = "hv (J4515)"];
ISOPAOH -> LHC4ACCHO [label = "OH (G4515)"];
ISOPBNO3 -> CH3O2 [label = "hv (J4505)"];
ISOPBNO3 -> HCHO [label = "OH (G4523)"];
ISOPBNO3 -> HCHO [label = "hv (J4505)"];
ISOPBNO3 -> MVK [label = "OH (G4523)"];
ISOPBNO3 -> MVK [label = "hv (J4505)"];
ISOPBNO3 -> MVKOH [label = "hv (J4505)"];
ISOPBO2 -> CH3O2 [label = " (G4517)"];
ISOPBO2 -> CH3O2 [label = "NO (G4519)"];
ISOPBO2 -> CH3O2 [label = "NO3 (G4520)"];
ISOPBO2 -> HCHO [label = " (G4517)"];
ISOPBO2 -> HCHO [label = "NO (G4519)"];
ISOPBO2 -> HCHO [label = "NO3 (G4520)"];
ISOPBO2 -> ISOPBNO3 [label = "NO (G4519)"];
ISOPBO2 -> ISOPBOH [label = " (G4517)"];
ISOPBO2 -> ISOPBOOH [label = "HO2 (G4518)"];
ISOPBO2 -> MVK [label = " (G4517)"];
ISOPBO2 -> MVK [label = "NO (G4519)"];
ISOPBO2 -> MVK [label = "NO3 (G4520)"];
ISOPBO2 -> MVKOH [label = " (G4517)"];
ISOPBO2 -> MVKOH [label = "NO (G4519)"];
ISOPBO2 -> MVKOH [label = "NO3 (G4520)"];
ISOPBOH -> CH3O2 [label = "OH (G4522)"];
ISOPBOH -> HCHO [label = "OH (G4522)"];
ISOPBOH -> MVK [label = "OH (G4522)"];
ISOPBOH -> MVKOH [label = "OH (G4522)"];
ISOPBOOH -> CH3O2 [label = "hv (J4504)"];
ISOPBOOH -> HCHO [label = "hv (J4504)"];
ISOPBOOH -> ISOPBO2 [label = "OH (G4521)"];
ISOPBOOH -> MVK [label = "hv (J4504)"];
ISOPBOOH -> MVKOH [label = "hv (J4504)"];
ISOPDNO3 -> HCHO [label = "hv (J4507)"];
ISOPDNO3 -> HCOC5 [label = "OH (G4530)"];
ISOPDNO3 -> MACR [label = "hv (J4507)"];
ISOPDO2 -> HCHO [label = " (G4524)"];
ISOPDO2 -> HCHO [label = "NO (G4526)"];
ISOPDO2 -> HCHO [label = "NO3 (G4527)"];
ISOPDO2 -> HCOC5 [label = " (G4524)"];
ISOPDO2 -> ISOPDNO3 [label = "NO (G4526)"];
ISOPDO2 -> ISOPDOH [label = " (G4524)"];
ISOPDO2 -> ISOPDOOH [label = "HO2 (G4525)"];
ISOPDO2 -> MACR [label = " (G4524)"];
ISOPDO2 -> MACR [label = "NO (G4526)"];
ISOPDO2 -> MACR [label = "NO3 (G4527)"];
ISOPDOH -> HCOC5 [label = "OH (G4529)"];
ISOPDOOH -> HCHO [label = "hv (J4506)"];
ISOPDOOH -> HCOC5 [label = "OH (G4528)"];
ISOPDOOH -> MACR [label = "hv (J4506)"];
LC578O2 -> ACETOL [label = " (G4546)"];
LC578O2 -> ACETOL [label = "NO (G4548)"];
LC578O2 -> ACETOL [label = "NO3 (G4549)"];
LC578O2 -> GLYOX [label = " (G4546)"];
LC578O2 -> GLYOX [label = "NO (G4548)"];
LC578O2 -> GLYOX [label = "NO3 (G4549)"];
LC578O2 -> HOCH2CHO [label = " (G4546)"];
LC578O2 -> HOCH2CHO [label = "NO (G4548)"];
LC578O2 -> HOCH2CHO [label = "NO3 (G4549)"];
LC578O2 -> LC578OOH [label = "HO2 (G4547)"];
LC578O2 -> MGLYOX [label = " (G4546)"];
LC578O2 -> MGLYOX [label = "NO (G4548)"];
LC578O2 -> MGLYOX [label = "NO3 (G4549)"];
LC578OOH -> ACETOL [label = "hv (J4512)"];
LC578OOH -> GLYOX [label = "hv (J4512)"];
LC578OOH -> HOCH2CHO [label = "hv (J4512)"];
LC578OOH -> LC578O2 [label = "OH (G4550)"];
LC578OOH -> MGLYOX [label = "hv (J4512)"];
LC5PAN1719 -> CO [label = "OH (G4559)"];
LC5PAN1719 -> CO [label = "hv (J4514)"];
LC5PAN1719 -> HO12CO3C4 [label = "OH (G4559)"];
LC5PAN1719 -> HO12CO3C4 [label = "hv (J4514)"];
LC5PAN1719 -> LHC4ACCO3 [label = " (G4558)"];
LC5PAN1719 -> MACROH [label = "OH (G4559)"];
LC5PAN1719 -> MACROH [label = "hv (J4514)"];
LHC4ACCHO -> ACETOL [label = "O3 (G4544)"];
LHC4ACCHO -> ACETOL [label = "hv (J4511)"];
LHC4ACCHO -> CH3CO3 [label = "O3 (G4544)"];
LHC4ACCHO -> CH3CO3 [label = "hv (J4511)"];
LHC4ACCHO -> CO [label = "O3 (G4544)"];
LHC4ACCHO -> CO [label = "hv (J4511)"];
LHC4ACCHO -> GLYOX [label = "O3 (G4544)"];
LHC4ACCHO -> HCHO [label = "O3 (G4544)"];
LHC4ACCHO -> HCOCO2H [label = "O3 (G4544)"];
LHC4ACCHO -> HOCH2CHO [label = "O3 (G4544)"];
LHC4ACCHO -> HOCH2CHO [label = "hv (J4511)"];
LHC4ACCHO -> HOCH2CO2H [label = "O3 (G4544)"];
LHC4ACCHO -> LC578O2 [label = "OH (G4543)"];
LHC4ACCHO -> LHC4ACCO3 [label = "NO3 (G4545)"];
LHC4ACCHO -> LHC4ACCO3 [label = "OH (G4543)"];
LHC4ACCHO -> LHC4ACCO3 [label = "hv (J4511)"];
LHC4ACCHO -> MGLYOX [label = "O3 (G4544)"];
LHC4ACCO2H -> ACETOL [label = "OH (G4556)"];
LHC4ACCO2H -> CH3CO3 [label = "OH (G4556)"];
LHC4ACCO2H -> CO [label = "OH (G4556)"];
LHC4ACCO2H -> CO2 [label = "OH (G4556)"];
LHC4ACCO2H -> HOCH2CHO [label = "OH (G4556)"];
LHC4ACCO3 -> ACETOL [label = " (G4551)"];
LHC4ACCO3 -> ACETOL [label = "NO (G4553)"];
LHC4ACCO3 -> ACETOL [label = "NO3 (G4555)"];
LHC4ACCO3 -> CH3CO3 [label = " (G4551)"];
LHC4ACCO3 -> CH3CO3 [label = "NO (G4553)"];
LHC4ACCO3 -> CH3CO3 [label = "NO3 (G4555)"];
LHC4ACCO3 -> CO [label = " (G4551)"];
LHC4ACCO3 -> CO [label = "NO (G4553)"];
LHC4ACCO3 -> CO [label = "NO3 (G4555)"];
LHC4ACCO3 -> CO2 [label = " (G4551)"];
LHC4ACCO3 -> CO2 [label = "NO (G4553)"];
LHC4ACCO3 -> CO2 [label = "NO3 (G4555)"];
LHC4ACCO3 -> HOCH2CHO [label = " (G4551)"];
LHC4ACCO3 -> HOCH2CHO [label = "NO (G4553)"];
LHC4ACCO3 -> HOCH2CHO [label = "NO3 (G4555)"];
LHC4ACCO3 -> LC5PAN1719 [label = "NO2 (G4554)"];
LHC4ACCO3 -> LHC4ACCO2H [label = " (G4551)"];
LHC4ACCO3 -> LHC4ACCO2H [label = "HO2 (G4552)"];
LHC4ACCO3 -> LHC4ACCO3H [label = "HO2 (G4552)"];
LHC4ACCO3H -> ACETOL [label = "hv (J4513)"];
LHC4ACCO3H -> CH3CO3 [label = "hv (J4513)"];
LHC4ACCO3H -> CO [label = "hv (J4513)"];
LHC4ACCO3H -> CO2 [label = "hv (J4513)"];
LHC4ACCO3H -> HOCH2CHO [label = "hv (J4513)"];
LHC4ACCO3H -> LHC4ACCO3 [label = "OH (G4557)"];
LISOPACNO3 -> LHC4ACCHO [label = "OH (G4516)"];
LISOPACNO3 -> LHC4ACCHO [label = "hv (J4503)"];
LISOPACO2 -> ISOPAOH [label = " (G4510)"];
LISOPACO2 -> LHC4ACCHO [label = " (G4510)"];
LISOPACO2 -> LHC4ACCHO [label = "NO (G4512)"];
LISOPACO2 -> LHC4ACCHO [label = "NO3 (G4513)"];
LISOPACO2 -> LISOPACNO3 [label = "NO (G4512)"];
LISOPACO2 -> LISOPACOOH [label = "HO2 (G4511)"];
LISOPACOOH -> LHC4ACCHO [label = "OH (G4514)"];
LISOPACOOH -> LHC4ACCHO [label = "hv (J4502)"];
LNISO3 -> CO [label = "NO (G4540)"];
LNISO3 -> CO [label = "NO3 (G4541)"];
LNISO3 -> CO2 [label = "NO (G4540)"];
LNISO3 -> CO2 [label = "NO3 (G4541)"];
LNISO3 -> GLYOX [label = "NO (G4540)"];
LNISO3 -> GLYOX [label = "NO3 (G4541)"];
LNISO3 -> LNISOOH [label = "HO2 (G4539)"];
LNISO3 -> NOA [label = "NO (G4540)"];
LNISO3 -> NOA [label = "NO3 (G4541)"];
LNISOOH -> CO [label = "hv (J4510)"];
LNISOOH -> CO2 [label = "hv (J4510)"];
LNISOOH -> GLYOX [label = "hv (J4510)"];
LNISOOH -> LNISO3 [label = "OH (G4542)"];
LNISOOH -> NOA [label = "hv (J4510)"];
NC4CHO -> CO [label = "O3 (G4537)"];
NC4CHO -> CO [label = "hv (J4509)"];
NC4CHO -> GLYOX [label = "O3 (G4537)"];
NC4CHO -> HCOCO2H [label = "O3 (G4537)"];
NC4CHO -> LNISO3 [label = "NO3 (G4538)"];
NC4CHO -> LNISO3 [label = "OH (G4536)"];
NC4CHO -> MGLYOX [label = "O3 (G4537)"];
NC4CHO -> NOA [label = "O3 (G4537)"];
NC4CHO -> NOA [label = "hv (J4509)"];
NISOPO2 -> LISOPACNO3 [label = " (G4531)"];
NISOPO2 -> NC4CHO [label = " (G4531)"];
NISOPO2 -> NC4CHO [label = "NO (G4533)"];
NISOPO2 -> NC4CHO [label = "NO3 (G4534)"];
NISOPO2 -> NISOPOOH [label = "HO2 (G4532)"];
NISOPOOH -> NC4CHO [label = "OH (G4535)"];
NISOPOOH -> NC4CHO [label = "hv (J4508)"];
}
