# Supplementary material for: The atmospheric chemistry box model CAABA/MECCA-3.0
Source: Copernicus journal article supplement (doi:10.5194/gmd-4-373-2011), 2011-05-06
Supplement: Supplementary file 9 [file gmd-4-373-2011-supplement.zip › caaba_3.0/mecca/graphviz/Cl.dot]

// Created automatically by xgraphviz, DO NOT EDIT!
digraph Cl {
  concentrate=true;
  rankdir=LR;
  size="8,8";
"Cl\nchemistry"
  [shape=box, fontsize=30,
  style="filled", color=red];
subgraph species {
node[shape=oval,
  color=yellow,
  style="filled"];
BrCl
CCl4
CF2Cl2
CF2ClBr
CFCl3
CH2ClBr
CH2ClI
CH3CCl3
CH3Cl
CHCl2Br
CHClBr2
Cl
Cl2
Cl2O2
ClHgBr
ClHgOBr
ClNO2
ClNO3
ClO
HCl
HOCl
HgCl
HgCl2
ICl
OClO
}
BrCl -> Cl [label = "Br (G7600)"];
BrCl -> Cl [label = "hv (J7600)"];
BrCl -> Cl2 [label = "Cl (G7604)"];
CCl4 -> Cl [label = "O1D (G6404)"];
CCl4 -> Cl [label = "hv (J6401)"];
CCl4 -> ClO [label = "O1D (G6404)"];
CF2Cl2 -> Cl [label = "O1D (G6500)"];
CF2Cl2 -> Cl [label = "hv (J6501)"];
CF2Cl2 -> ClO [label = "O1D (G6500)"];
CF2ClBr -> Cl [label = "hv (J7601)"];
CFCl3 -> Cl [label = "O1D (G6501)"];
CFCl3 -> Cl [label = "hv (J6500)"];
CFCl3 -> ClO [label = "O1D (G6501)"];
CH2ClBr -> Cl [label = "hv (J7602)"];
CH2ClI -> Cl [label = "hv (J8403)"];
CH3CCl3 -> Cl [label = "O1D (G6407)"];
CH3CCl3 -> Cl [label = "OH (G6408)"];
CH3CCl3 -> Cl [label = "hv (J6402)"];
CH3Cl -> Cl [label = "O1D (G6405)"];
CH3Cl -> Cl [label = "OH (G6406)"];
CH3Cl -> Cl [label = "hv (J6400)"];
CHCl2Br -> Cl [label = "hv (J7603)"];
CHClBr2 -> Cl [label = "hv (J7604)"];
Cl -> BrCl [label = "Br2 (G7602)"];
Cl -> Cl2 [label = "BrCl (G7604)"];
Cl -> Cl2 [label = "ClNO3 (G6304)"];
Cl -> ClHgBr [label = "HgBr (G10706)"];
Cl -> ClO [label = "HO2 (G6201b)"];
Cl -> ClO [label = "O3 (G6100)"];
Cl -> HCl [label = "C2H2 (G6411)"];
Cl -> HCl [label = "C2H4 (G6409)"];
Cl -> HCl [label = "C2H6 (G6412)"];
Cl -> HCl [label = "CH3CHO (G6410)"];
Cl -> HCl [label = "CH3OOH (G6402)"];
Cl -> HCl [label = "CH4 (G6400)"];
Cl -> HCl [label = "DMS (G9600)"];
Cl -> HCl [label = "H2 (G6200)"];
Cl -> HCl [label = "H2O2 (G6202)"];
Cl -> HCl [label = "HCHO (G6401)"];
Cl -> HCl [label = "HO2 (G6201a)"];
Cl -> HgCl [label = "Hg (G10600)"];
Cl2 -> BrCl [label = "Br (G7601)"];
Cl2 -> Cl [label = "Br (G7601)"];
Cl2 -> Cl [label = "hv (J6000)"];
Cl2 -> HgCl2 [label = "Hg (G10601)"];
Cl2O2 -> Cl [label = "hv (J6100)"];
Cl2O2 -> ClO [label = " (G6103)"];
ClNO2 -> Cl [label = "hv (J6300)"];
ClNO3 -> BrCl [label = "HBr (HET540)"];
ClNO3 -> Cl [label = "hv (J6301a)"];
ClNO3 -> Cl2 [label = "Cl (G6304)"];
ClNO3 -> Cl2 [label = "HCl (HET420)"];
ClNO3 -> ClO [label = " (G6302)"];
ClNO3 -> ClO [label = "O3P (G6303)"];
ClNO3 -> ClO [label = "hv (J6301b)"];
ClNO3 -> HOCl [label = "H2O (HET421)"];
ClO -> BrCl [label = "BrO (G7603c)"];
ClO -> Cl [label = "BrO (G7603b)"];
ClO -> Cl [label = "CH3O2 (G6403)"];
ClO -> Cl [label = "ClO (G6102b)"];
ClO -> Cl [label = "ClO (G6102c)"];
ClO -> Cl [label = "IO (G8600)"];
ClO -> Cl [label = "NO (G6300)"];
ClO -> Cl [label = "O3P (G6101)"];
ClO -> Cl [label = "OH (G6203)"];
ClO -> Cl2 [label = "ClO (G6102a)"];
ClO -> Cl2O2 [label = "ClO (G6102d)"];
ClO -> ClNO3 [label = "NO2 (G6301)"];
ClO -> HCl [label = "OH (G6203)"];
ClO -> HOCl [label = "HO2 (G6204)"];
ClO -> ICl [label = "IO (G8600)"];
ClO -> OClO [label = "BrO (G7603a)"];
ClO -> OClO [label = "ClO (G6102c)"];
ClO -> OClO [label = "IO (G8600)"];
HCl -> BrCl [label = "BrNO3 (HET541)"];
HCl -> BrCl [label = "HOBr (HET543)"];
HCl -> Cl [label = "OH (G6205)"];
HCl -> Cl [label = "hv (J6200)"];
HCl -> Cl2 [label = "ClNO3 (HET420)"];
HCl -> Cl2 [label = "HOCl (HET410)"];
HCl -> ClNO2 [label = "N2O5 (HET422)"];
HOCl -> BrCl [label = "HBr (HET542)"];
HOCl -> Cl [label = "hv (J6201)"];
HOCl -> Cl2 [label = "HCl (HET410)"];
HOCl -> ClO [label = "OH (G6206)"];
HgCl -> ClHgBr [label = "Br (G10707)"];
HgCl -> ClHgOBr [label = "BrO (G10705)"];
ICl -> Cl [label = "hv (J8600)"];
OClO -> ClO [label = "hv (J6101)"];
}
