# Supplementary material for: The atmospheric chemistry box model CAABA/MECCA-3.0
Source: Copernicus journal article supplement (doi:10.5194/gmd-4-373-2011), 2011-05-06
Supplement: Supplementary file 9 [file gmd-4-373-2011-supplement.zip › caaba_3.0/mecca/graphviz/I.dot]

// Created automatically by xgraphviz, DO NOT EDIT!
digraph I {
  concentrate=true;
  rankdir=LR;
  size="8,8";
"I\nchemistry"
  [shape=box, fontsize=30,
  style="filled", color=red];
subgraph species {
node[shape=oval,
  color=yellow,
  style="filled"];
C3H7I
CH2ClI
CH2I2
CH3I
HI
HIO3
HOI
I
I2
IBr
ICl
INO2
INO3
IO
OIO
}
C3H7I -> I [label = "OH (G8400)"];
C3H7I -> I [label = "hv (J8402)"];
CH2ClI -> I [label = "hv (J8403)"];
CH2I2 -> I [label = "hv (J8400)"];
CH3I -> I [label = "hv (J8401)"];
CH3I -> IO [label = "NO3 (G8402)"];
HI -> I [label = "OH (G8202)"];
HOI -> I [label = "hv (J8200)"];
I -> HI [label = "HO2 (G8200)"];
I -> INO2 [label = "NO2 (G8300)"];
I -> IO [label = "BrO (G8700)"];
I -> IO [label = "NO3 (G8301)"];
I -> IO [label = "O3 (G8100)"];
I2 -> HOI [label = "OH (G8204)"];
I2 -> I [label = "NO3 (G8307)"];
I2 -> I [label = "OH (G8204)"];
I2 -> I [label = "hv (J8000)"];
I2 -> INO3 [label = "NO3 (G8307)"];
IBr -> I [label = "hv (J8700)"];
ICl -> I [label = "hv (J8600)"];
INO2 -> I [label = " (G8305)"];
INO2 -> I [label = "hv (J8300)"];
INO3 -> I [label = "hv (J8301)"];
INO3 -> IO [label = " (G8306)"];
IO -> HOI [label = "HO2 (G8201)"];
IO -> I [label = "BrO (G8701)"];
IO -> I [label = "CH3O2 (G8401)"];
IO -> I [label = "ClO (G8600)"];
IO -> I [label = "DMS (G9800)"];
IO -> I [label = "IO (G8103)"];
IO -> I [label = "NO (G8302)"];
IO -> I [label = "hv (J8100)"];
IO -> ICl [label = "ClO (G8600)"];
IO -> INO3 [label = "NO2 (G8303)"];
IO -> OIO [label = "BrO (G8701)"];
IO -> OIO [label = "CH3O2 (G8401)"];
IO -> OIO [label = "IO (G8103)"];
IO -> OIO [label = "NO3 (G8308)"];
OIO -> HIO3 [label = "OH (G8203)"];
OIO -> IO [label = "NO (G8304)"];
}
