# Supplementary material for: The atmospheric chemistry box model CAABA/MECCA-3.0
Source: Copernicus journal article supplement (doi:10.5194/gmd-4-373-2011), 2011-05-06
Supplement: Supplementary file 9 [file gmd-4-373-2011-supplement.zip › caaba_3.0/mecca/graphviz/OH_HO2.dot]

// Created automatically by xgraphviz, DO NOT EDIT!
digraph OH_HO2 {
  concentrate=true;
  rankdir=LR;
  size="8,8";
"OH_HO2\nchemistry"
  [shape=box, fontsize=30,
  style="filled", color=red];
subgraph species {
node[shape=oval,
  color=yellow,
  style="filled"];
HO2
OH
}
ACETOL -> HO2 [label = "OH (G4316)"];
ACETOL -> HO2 [label = "hv (J4302)"];
Br -> HO2 [label = "HCHO (G7400)"];
BrO -> HO2 [label = "CH3O2 (G7402b)"];
C2H2 -> HO2 [label = "OH (G4222)"];
C2H2 -> OH [label = "OH (G4222)"];
C2H4 -> HO2 [label = "O3 (G4201)"];
C2H4 -> OH [label = "O3 (G4201)"];
C2H5O2 -> HO2 [label = " (G4206)"];
C2H5O2 -> HO2 [label = "NO (G4204)"];
C2H5O2 -> HO2 [label = "NO3 (G4205)"];
C2H5OOH -> HO2 [label = "hv (J4200)"];
C2H5OOH -> OH [label = "OH (G4207)"];
C2H5OOH -> OH [label = "hv (J4200)"];
C3H6 -> HO2 [label = "O3 (G4301)"];
C3H6 -> OH [label = "O3 (G4301)"];
C3H8 -> HO2 [label = "OH (G4300)"];
C59OOH -> OH [label = "hv (J4516)"];
C5H8 -> HO2 [label = "O3 (G4500)"];
C5H8 -> OH [label = "O3 (G4500)"];
CH2ClI -> HO2 [label = "hv (J8403)"];
CH2I2 -> HO2 [label = "hv (J8400)"];
CH3CCl3 -> OH [label = "O1D (G6407)"];
CH3CHO -> HO2 [label = "hv (J4201)"];
CH3CO3H -> OH [label = "hv (J4202)"];
CH3Cl -> OH [label = "O1D (G6405)"];
CH3O2 -> HO2 [label = " (G4106a)"];
CH3O2 -> HO2 [label = "BrO (G7402b)"];
CH3O2 -> HO2 [label = "ClO (G6403)"];
CH3O2 -> HO2 [label = "IO (G8401)"];
CH3O2 -> HO2 [label = "NO (G4104)"];
CH3O2 -> HO2 [label = "NO3 (G4105)"];
CH3OH -> HO2 [label = "OH (G4102)"];
CH3OOH -> HO2 [label = "hv (J4100)"];
CH3OOH -> OH [label = "Cl (G6402)"];
CH3OOH -> OH [label = "OH (G4107)"];
CH3OOH -> OH [label = "hv (J4100)"];
CH4 -> OH [label = "O1D (G4100)"];
CO2H3CHO -> HO2 [label = "hv (J4418)"];
CO2H3CO3 -> HO2 [label = " (G4451)"];
CO2H3CO3 -> HO2 [label = "NO (G4453)"];
CO2H3CO3 -> HO2 [label = "NO3 (G4454)"];
CO2H3CO3H -> HO2 [label = "hv (J4409)"];
CO2H3CO3H -> HO2 [label = "hv (J4410)"];
CO2H3CO3H -> OH [label = "hv (J4409)"];
Cl -> HO2 [label = "H2O2 (G6202)"];
Cl -> HO2 [label = "HCHO (G6401)"];
Cl -> OH [label = "CH3OOH (G6402)"];
Cl -> OH [label = "HO2 (G6201b)"];
ClO -> HO2 [label = "CH3O2 (G6403)"];
ClO -> HO2 [label = "OH (G6203)"];
DMS -> HO2 [label = "OH (G9400b)"];
DMSO -> HO2 [label = "OH (G9402)"];
ETHGLY -> HO2 [label = "OH (G4248)"];
ETHOHNO3 -> HO2 [label = "hv (J4212)"];
GLYOX -> HO2 [label = "NO3 (G4235)"];
GLYOX -> HO2 [label = "OH (G4234)"];
GLYOX -> HO2 [label = "hv (J4208)"];
H -> HO2 [label = "O2 (G2100)"];
H -> OH [label = "HO2 (G2108a)"];
H -> OH [label = "O3 (G2101)"];
H2 -> OH [label = "O1D (G2102)"];
H2O -> OH [label = "O1D (G2111)"];
H2O -> OH [label = "hv (J2100)"];
H2O2 -> HO2 [label = "Cl (G6202)"];
H2O2 -> HO2 [label = "OH (G2112)"];
H2O2 -> OH [label = "hv (J2101)"];
HCHO -> HO2 [label = "Br (G7400)"];
HCHO -> HO2 [label = "Cl (G6401)"];
HCHO -> HO2 [label = "NO3 (G4109)"];
HCHO -> HO2 [label = "OH (G4108)"];
HCHO -> HO2 [label = "hv (J4101b)"];
HCOCO2H -> HO2 [label = "OH (G4240)"];
HCOCO2H -> HO2 [label = "hv (J4209)"];
HCOCO3 -> HO2 [label = " (G4236)"];
HCOCO3 -> HO2 [label = "NO (G4238)"];
HCOCO3 -> HO2 [label = "NO3 (G4239)"];
HCOCO3H -> HO2 [label = "hv (J4210)"];
HCOCO3H -> OH [label = "hv (J4210)"];
HCOOH -> HO2 [label = "OH (G4111)"];
HNO -> HO2 [label = "O2 (G3224)"];
HNO3 -> OH [label = "hv (J3201)"];
HNO4 -> HO2 [label = " (G3207)"];
HNO4 -> HO2 [label = "hv (J3202)"];
HNO4 -> OH [label = "hv (J3202)"];
HO12CO3C4 -> HO2 [label = "OH (G4456)"];
HO12CO3C4 -> HO2 [label = "hv (J4419)"];
HO2 -> C2H5OOH [label = "C2H5O2 (G4203)"];
HO2 -> C59OOH [label = "C59O2 (G4562)"];
HO2 -> CH3CO2H [label = "CH3CO3 (G4211b)"];
HO2 -> CH3CO3H [label = "CH3CO3 (G4211a)"];
HO2 -> CH3OOH [label = "CH3O2 (G4103)"];
HO2 -> CH3SO3H [label = "CH3SO3 (G9405)"];
HO2 -> CO2H3CO3H [label = "CO2H3CO3 (G4452)"];
HO2 -> ClO [label = "Cl (G6201b)"];
HO2 -> H2 [label = "H (G2108b)"];
HO2 -> H2O [label = "H (G2108c)"];
HO2 -> H2O [label = "NH2 (G3212)"];
HO2 -> H2O [label = "OH (G2109)"];
HO2 -> H2O2 [label = "HO2 (G2110)"];
HO2 -> HBr [label = "Br (G7200)"];
HO2 -> HCOCO2H [label = "HCOCO3 (G4237)"];
HO2 -> HCOCO3H [label = "HCOCO3 (G4237)"];
HO2 -> HCl [label = "Cl (G6201a)"];
HO2 -> HI [label = "I (G8200)"];
HO2 -> HNO [label = "NH2 (G3212)"];
HO2 -> HNO4 [label = "NO2 (G3203)"];
HO2 -> HO2_a01 [label = " (H2101f_a01)"];
HO2 -> HOBr [label = "BrO (G7201)"];
HO2 -> HOCH2CO2H [label = "HOCH2CO3 (G4226)"];
HO2 -> HOCH2CO3H [label = "HOCH2CO3 (G4226)"];
HO2 -> HOCl [label = "ClO (G6204)"];
HO2 -> HOI [label = "IO (G8201)"];
HO2 -> HYETHO2H [label = "HOCH2CH2O2 (G4244)"];
HO2 -> HYPERACET [label = "CH3COCH2O2 (G4312)"];
HO2 -> HYPROPO2H [label = "HYPROPO2 (G4323)"];
HO2 -> IC3H7OOH [label = "IC3H7O2 (G4304)"];
HO2 -> ISOPBOOH [label = "ISOPBO2 (G4518)"];
HO2 -> ISOPDOOH [label = "ISOPDO2 (G4525)"];
HO2 -> LC4H9OOH [label = "LC4H9O2 (G4402)"];
HO2 -> LC578OOH [label = "LC578O2 (G4547)"];
HO2 -> LHC4ACCO2H [label = "LHC4ACCO3 (G4552)"];
HO2 -> LHC4ACCO3H [label = "LHC4ACCO3 (G4552)"];
HO2 -> LHMVKABOOH [label = "LHMVKABO2 (G4438)"];
HO2 -> LISOPACOOH [label = "LISOPACO2 (G4511)"];
HO2 -> LMEKOOH [label = "LMEKO2 (G4414)"];
HO2 -> LMVKOHABOOH [label = "LMVKOHABO2 (G4445)"];
HO2 -> LNISOOH [label = "LNISO3 (G4539)"];
HO2 -> MACO2H [label = "MACO3 (G4425)"];
HO2 -> MACO3H [label = "MACO3 (G4425)"];
HO2 -> MACROOH [label = "MACRO2 (G4430)"];
HO2 -> NH2O [label = "NH2 (G3211)"];
HO2 -> NISOPOOH [label = "NISOPO2 (G4532)"];
HO2 -> NO2 [label = "NO (G3201)"];
HO2 -> NO2 [label = "NO3 (G3204)"];
HO2 -> O2 [label = "Br (G7200)"];
HO2 -> O2 [label = "BrO (G7201)"];
HO2 -> O2 [label = "CH3O2 (G4103)"];
HO2 -> O2 [label = "Cl (G6201a)"];
HO2 -> O2 [label = "ClO (G6204)"];
HO2 -> O2 [label = "H (G2108b)"];
HO2 -> O2 [label = "HO2 (G2110)"];
HO2 -> O2 [label = "I (G8200)"];
HO2 -> O2 [label = "IO (G8201)"];
HO2 -> O2 [label = "NO3 (G3204)"];
HO2 -> O2 [label = "O3 (G2107)"];
HO2 -> O2 [label = "O3P (G2106)"];
HO2 -> O2 [label = "OH (G2109)"];
HO2 -> O3 [label = "CH3CO3 (G4211b)"];
HO2 -> O3 [label = "HCOCO3 (G4237)"];
HO2 -> O3 [label = "HOCH2CO3 (G4226)"];
HO2 -> O3 [label = "LHC4ACCO3 (G4552)"];
HO2 -> O3 [label = "MACO3 (G4425)"];
HO2 -> O3P [label = "H (G2108c)"];
HO2 -> OH [label = "Cl (G6201b)"];
HO2 -> OH [label = "H (G2108a)"];
HO2 -> OH [label = "NH2 (G3211)"];
HO2 -> OH [label = "NO (G3201)"];
HO2 -> OH [label = "NO3 (G3204)"];
HO2 -> OH [label = "O3 (G2107)"];
HO2 -> OH [label = "O3P (G2106)"];
HO2 -> PR2O2HNO3 [label = "PRONO3BO2 (G4327)"];
HO2_a01 -> HO2 [label = " (H2101b_a01)"];
HOBr -> OH [label = "O3P (G7203)"];
HOBr -> OH [label = "hv (J7200)"];
HOCH2CH2O -> HO2 [label = " (G4247a)"];
HOCH2CH2O -> HO2 [label = " (G4247b)"];
HOCH2CH2O2 -> HO2 [label = "NO (G4243)"];
HOCH2CHO -> HO2 [label = "OH (G4223)"];
HOCH2CHO -> HO2 [label = "hv (J4205)"];
HOCH2CO2H -> HO2 [label = "OH (G4230)"];
HOCH2CO3 -> HO2 [label = " (G4225)"];
HOCH2CO3 -> HO2 [label = "NO (G4227)"];
HOCH2CO3 -> HO2 [label = "NO3 (G4229)"];
HOCH2CO3H -> HO2 [label = "hv (J4206)"];
HOCH2CO3H -> OH [label = "hv (J4206)"];
HOCH2COCHO -> HO2 [label = "hv (J4311)"];
HOCH2COCO2H -> HO2 [label = "hv (J4308)"];
HOCl -> OH [label = "hv (J6201)"];
HOI -> OH [label = "hv (J8200)"];
HONO -> OH [label = "hv (J3200)"];
HYETHO2H -> OH [label = "OH (G4246b)"];
HYETHO2H -> OH [label = "hv (J4211)"];
HYPERACET -> OH [label = "OH (G4315b)"];
HYPERACET -> OH [label = "hv (J4304)"];
HYPROPO2 -> HO2 [label = " (G4322)"];
HYPROPO2 -> HO2 [label = "NO (G4324)"];
HYPROPO2 -> HO2 [label = "NO3 (G4325)"];
HYPROPO2H -> HO2 [label = "hv (J4309)"];
HYPROPO2H -> OH [label = "OH (G4326b)"];
HYPROPO2H -> OH [label = "hv (J4309)"];
IC3H7NO3 -> HO2 [label = "hv (J4306)"];
IC3H7O2 -> HO2 [label = " (G4306)"];
IC3H7O2 -> HO2 [label = "NO (G4305)"];
IC3H7OOH -> HO2 [label = "hv (J4300)"];
IC3H7OOH -> OH [label = "OH (G4307)"];
IC3H7OOH -> OH [label = "hv (J4300)"];
IO -> HO2 [label = "CH3O2 (G8401)"];
ISOPAOH -> HO2 [label = "OH (G4515)"];
ISOPBNO3 -> HO2 [label = "hv (J4505)"];
ISOPBO2 -> HO2 [label = " (G4517)"];
ISOPBO2 -> HO2 [label = "NO (G4519)"];
ISOPBO2 -> HO2 [label = "NO3 (G4520)"];
ISOPBOH -> HO2 [label = "OH (G4522)"];
ISOPBOOH -> HO2 [label = "hv (J4504)"];
ISOPBOOH -> OH [label = "hv (J4504)"];
ISOPDNO3 -> HO2 [label = "hv (J4507)"];
ISOPDO2 -> HO2 [label = " (G4524)"];
ISOPDO2 -> HO2 [label = "NO (G4526)"];
ISOPDO2 -> HO2 [label = "NO3 (G4527)"];
ISOPDOH -> HO2 [label = "OH (G4529)"];
ISOPDOOH -> HO2 [label = "hv (J4506)"];
ISOPDOOH -> OH [label = "OH (G4528)"];
ISOPDOOH -> OH [label = "hv (J4506)"];
LC4H9NO3 -> HO2 [label = "hv (J4406)"];
LC4H9O2 -> HO2 [label = " (G4401)"];
LC4H9O2 -> HO2 [label = "NO (G4403)"];
LC4H9OOH -> HO2 [label = "hv (J4400)"];
LC4H9OOH -> OH [label = "OH (G4404)"];
LC4H9OOH -> OH [label = "hv (J4400)"];
LC578O2 -> HO2 [label = " (G4546)"];
LC578O2 -> HO2 [label = "NO (G4548)"];
LC578O2 -> HO2 [label = "NO3 (G4549)"];
LC578OOH -> HO2 [label = "hv (J4512)"];
LC578OOH -> OH [label = "hv (J4512)"];
LHC4ACCHO -> HO2 [label = "O3 (G4544)"];
LHC4ACCHO -> HO2 [label = "hv (J4511)"];
LHC4ACCHO -> OH [label = "O3 (G4544)"];
LHC4ACCO2H -> HO2 [label = "OH (G4556)"];
LHC4ACCO3 -> HO2 [label = " (G4551)"];
LHC4ACCO3 -> HO2 [label = "NO (G4553)"];
LHC4ACCO3 -> HO2 [label = "NO3 (G4555)"];
LHC4ACCO3H -> HO2 [label = "hv (J4513)"];
LHC4ACCO3H -> OH [label = "hv (J4513)"];
LHMVKABO2 -> HO2 [label = " (G4437)"];
LHMVKABO2 -> HO2 [label = "NO (G4439)"];
LHMVKABO2 -> HO2 [label = "NO3 (G4440)"];
LHMVKABOOH -> HO2 [label = "hv (J4416)"];
LHMVKABOOH -> OH [label = "OH (G4441)"];
LHMVKABOOH -> OH [label = "hv (J4416)"];
LISOPACNO3 -> HO2 [label = "hv (J4503)"];
LISOPACO2 -> HO2 [label = " (G4510)"];
LISOPACO2 -> HO2 [label = "NO (G4512)"];
LISOPACO2 -> HO2 [label = "NO3 (G4513)"];
LISOPACOOH -> HO2 [label = "hv (J4502)"];
LISOPACOOH -> OH [label = "OH (G4514)"];
LISOPACOOH -> OH [label = "hv (J4502)"];
LMEKOOH -> OH [label = "OH (G4416)"];
LMEKOOH -> OH [label = "hv (J4404)"];
LMVKOHABO2 -> HO2 [label = " (G4444)"];
LMVKOHABO2 -> HO2 [label = "NO (G4446)"];
LMVKOHABO2 -> HO2 [label = "NO3 (G4447)"];
LMVKOHABOOH -> HO2 [label = "hv (J4408)"];
LMVKOHABOOH -> OH [label = "OH (G4448)"];
LMVKOHABOOH -> OH [label = "hv (J4408)"];
LNISO3 -> HO2 [label = "NO (G4540)"];
LNISO3 -> HO2 [label = "NO3 (G4541)"];
LNISOOH -> HO2 [label = "hv (J4510)"];
LNISOOH -> OH [label = "hv (J4510)"];
MACO3H -> OH [label = "hv (J4415)"];
MACR -> HO2 [label = "O3 (G4422)"];
MACR -> HO2 [label = "hv (J4411)"];
MACR -> OH [label = "O3 (G4422)"];
MACRO2 -> HO2 [label = " (G4429)"];
MACRO2 -> HO2 [label = "NO (G4431)"];
MACRO2 -> HO2 [label = "NO3 (G4432)"];
MACROH -> HO2 [label = "OH (G4434)"];
MACROH -> HO2 [label = "hv (J4414)"];
MACROOH -> HO2 [label = "hv (J4412)"];
MACROOH -> HO2 [label = "hv (J4413)"];
MACROOH -> OH [label = "hv (J4412)"];
MACROOH -> OH [label = "hv (J4413)"];
MGLYOX -> HO2 [label = "hv (J4303)"];
MVK -> HO2 [label = "O3 (G4405)"];
MVK -> HO2 [label = "hv (J4401)"];
MVK -> OH [label = "O3 (G4405)"];
MVKOH -> HO2 [label = "O3 (G4443)"];
MVKOH -> HO2 [label = "hv (J4417)"];
MVKOH -> OH [label = "O3 (G4443)"];
NC4CHO -> HO2 [label = "O3 (G4537)"];
NC4CHO -> HO2 [label = "hv (J4509)"];
NC4CHO -> OH [label = "O3 (G4537)"];
NH2 -> HO2 [label = "NO (G3213)"];
NH2 -> OH [label = "HO2 (G3211)"];
NH2 -> OH [label = "NO (G3213)"];
NISOPO2 -> HO2 [label = " (G4531)"];
NISOPO2 -> HO2 [label = "NO (G4533)"];
NISOPO2 -> HO2 [label = "NO3 (G4534)"];
NISOPOOH -> HO2 [label = "hv (J4508)"];
NISOPOOH -> OH [label = "OH (G4535)"];
NISOPOOH -> OH [label = "hv (J4508)"];
NO -> HO2 [label = "C2H5O2 (G4204)"];
NO -> HO2 [label = "CH3O2 (G4104)"];
NO -> HO2 [label = "CO2H3CO3 (G4453)"];
NO -> HO2 [label = "HCOCO3 (G4238)"];
NO -> HO2 [label = "HOCH2CH2O2 (G4243)"];
NO -> HO2 [label = "HOCH2CO3 (G4227)"];
NO -> HO2 [label = "HYPROPO2 (G4324)"];
NO -> HO2 [label = "IC3H7O2 (G4305)"];
NO -> HO2 [label = "ISOPBO2 (G4519)"];
NO -> HO2 [label = "ISOPDO2 (G4526)"];
NO -> HO2 [label = "LC4H9O2 (G4403)"];
NO -> HO2 [label = "LC578O2 (G4548)"];
NO -> HO2 [label = "LHC4ACCO3 (G4553)"];
NO -> HO2 [label = "LHMVKABO2 (G4439)"];
NO -> HO2 [label = "LISOPACO2 (G4512)"];
NO -> HO2 [label = "LMVKOHABO2 (G4446)"];
NO -> HO2 [label = "LNISO3 (G4540)"];
NO -> HO2 [label = "MACRO2 (G4431)"];
NO -> HO2 [label = "NH2 (G3213)"];
NO -> HO2 [label = "NISOPO2 (G4533)"];
NO -> HO2 [label = "PRONO3BO2 (G4328)"];
NO -> OH [label = "HO2 (G3201)"];
NO -> OH [label = "NH2 (G3213)"];
NO3 -> HO2 [label = "C2H5O2 (G4205)"];
NO3 -> HO2 [label = "CH3O2 (G4105)"];
NO3 -> HO2 [label = "CO2H3CO3 (G4454)"];
NO3 -> HO2 [label = "GLYOX (G4235)"];
NO3 -> HO2 [label = "HCHO (G4109)"];
NO3 -> HO2 [label = "HCOCO3 (G4239)"];
NO3 -> HO2 [label = "HOCH2CO3 (G4229)"];
NO3 -> HO2 [label = "HYPROPO2 (G4325)"];
NO3 -> HO2 [label = "ISOPBO2 (G4520)"];
NO3 -> HO2 [label = "ISOPDO2 (G4527)"];
NO3 -> HO2 [label = "LC578O2 (G4549)"];
NO3 -> HO2 [label = "LHC4ACCO3 (G4555)"];
NO3 -> HO2 [label = "LHMVKABO2 (G4440)"];
NO3 -> HO2 [label = "LISOPACO2 (G4513)"];
NO3 -> HO2 [label = "LMVKOHABO2 (G4447)"];
NO3 -> HO2 [label = "LNISO3 (G4541)"];
NO3 -> HO2 [label = "MACRO2 (G4432)"];
NO3 -> HO2 [label = "NISOPO2 (G4534)"];
NO3 -> HO2 [label = "PRONO3BO2 (G4329)"];
NO3 -> OH [label = "HO2 (G3204)"];
O1D -> OH [label = "CH3CCl3 (G6407)"];
O1D -> OH [label = "CH3Cl (G6405)"];
O1D -> OH [label = "CH4 (G4100)"];
O1D -> OH [label = "H2 (G2102)"];
O1D -> OH [label = "H2O (G2111)"];
O2 -> HO2 [label = "H (G2100)"];
O2 -> HO2 [label = "HNO (G3224)"];
O3 -> HO2 [label = "C2H4 (G4201)"];
O3 -> HO2 [label = "C3H6 (G4301)"];
O3 -> HO2 [label = "C5H8 (G4500)"];
O3 -> HO2 [label = "LHC4ACCHO (G4544)"];
O3 -> HO2 [label = "MACR (G4422)"];
O3 -> HO2 [label = "MVK (G4405)"];
O3 -> HO2 [label = "MVKOH (G4443)"];
O3 -> HO2 [label = "NC4CHO (G4537)"];
O3 -> HO2 [label = "OH (G2104)"];
O3 -> OH [label = "C2H4 (G4201)"];
O3 -> OH [label = "C3H6 (G4301)"];
O3 -> OH [label = "C5H8 (G4500)"];
O3 -> OH [label = "H (G2101)"];
O3 -> OH [label = "HO2 (G2107)"];
O3 -> OH [label = "LHC4ACCHO (G4544)"];
O3 -> OH [label = "MACR (G4422)"];
O3 -> OH [label = "MVK (G4405)"];
O3 -> OH [label = "MVKOH (G4443)"];
O3 -> OH [label = "NC4CHO (G4537)"];
O3P -> OH [label = "HO2 (G2106)"];
O3P -> OH [label = "HOBr (G7203)"];
OH -> ACETOL [label = "HYPROPO2H (G4326b)"];
OH -> ACETOL [label = "LHC4ACCO2H (G4556)"];
OH -> ACETOL [label = "MACROH (G4434)"];
OH -> ACETOL [label = "MPAN (G4418)"];
OH -> BIACET [label = "LMEKOOH (G4416)"];
OH -> BIACETOH [label = "HO12CO3C4 (G4456)"];
OH -> BIACETOH [label = "LHMVKABOOH (G4441)"];
OH -> Br [label = "Br2 (G7204)"];
OH -> Br [label = "CH2Br2 (G7408)"];
OH -> Br [label = "CH2ClBr (G7607)"];
OH -> Br [label = "CH3Br (G7403)"];
OH -> Br [label = "CHBr3 (G7407)"];
OH -> Br [label = "CHCl2Br (G7605)"];
OH -> Br [label = "CHClBr2 (G7606)"];
OH -> Br [label = "HBr (G7202)"];
OH -> C2H5O2 [label = "C2H5OOH (G4207)"];
OH -> C2H5O2 [label = "C2H6 (G4200)"];
OH -> C2H5O2 [label = "C3H8 (G4300)"];
OH -> C2H5O2 [label = "LC4H9NO3 (G4417)"];
OH -> C2H5O2 [label = "LC4H9OOH (G4404)"];
OH -> C2H5O2 [label = "LMEKOOH (G4416)"];
OH -> C59O2 [label = "C59OOH (G4565)"];
OH -> C59O2 [label = "HCOC5 (G4560)"];
OH -> CH3CHO [label = "C2H5OOH (G4207)"];
OH -> CH3CO3 [label = "CH3CHO (G4208)"];
OH -> CH3CO3 [label = "CH3CO3H (G4218)"];
OH -> CH3CO3 [label = "LHC4ACCO2H (G4556)"];
OH -> CH3CO3 [label = "MACO2H (G4435)"];
OH -> CH3CO3 [label = "MGLYOX (G4317)"];
OH -> CH3COCH2O2 [label = "CH3COCH3 (G4311)"];
OH -> CH3COCH2O2 [label = "HYPERACET (G4315a)"];
OH -> CH3COCH2O2 [label = "LMEKOOH (G4416)"];
OH -> CH3COCH3 [label = "IC3H7NO3 (G4320)"];
OH -> CH3COCH3 [label = "IC3H7OOH (G4307)"];
OH -> CH3O2 [label = "C3H7I (G8400)"];
OH -> CH3O2 [label = "CH3CO2H (G4210)"];
OH -> CH3O2 [label = "CH3OOH (G4107)"];
OH -> CH3O2 [label = "CH4 (G4101)"];
OH -> CH3O2 [label = "DMSO (G9402)"];
OH -> CH3O2 [label = "ISOPBOH (G4522)"];
OH -> CH3SO2 [label = "DMS (G9400a)"];
OH -> CH3SO3H [label = "DMSO (G9402)"];
OH -> CO [label = "C2H2 (G4222)"];
OH -> CO [label = "GLYOX (G4234)"];
OH -> CO [label = "HCHO (G4108)"];
OH -> CO [label = "HCOCO2H (G4240)"];
OH -> CO [label = "HOCH2COCHO (G4333)"];
OH -> CO [label = "LC5PAN1719 (G4559)"];
OH -> CO [label = "LHC4ACCO2H (G4556)"];
OH -> CO [label = "MGLYOX (G4317)"];
OH -> CO [label = "MPAN (G4418)"];
OH -> CO [label = "PAN (G4220)"];
OH -> CO [label = "PHAN (G4233)"];
OH -> CO2 [label = "C3H8 (G4300)"];
OH -> CO2 [label = "CH3CO2H (G4210)"];
OH -> CO2 [label = "CO (G4110)"];
OH -> CO2 [label = "HCOCO2H (G4240)"];
OH -> CO2 [label = "HCOOH (G4111)"];
OH -> CO2 [label = "HOCH2CO2H (G4230)"];
OH -> CO2 [label = "HOCH2COCO2H (G4335)"];
OH -> CO2 [label = "LC4H9NO3 (G4417)"];
OH -> CO2 [label = "LC4H9OOH (G4404)"];
OH -> CO2 [label = "LHC4ACCO2H (G4556)"];
OH -> CO2 [label = "LMEKOOH (G4416)"];
OH -> CO2 [label = "MACO2H (G4435)"];
OH -> CO2H3CHO [label = "LHMVKABOOH (G4441)"];
OH -> CO2H3CHO [label = "LMVKOHABOOH (G4448)"];
OH -> CO2H3CO3 [label = "CO2H3CHO (G4449)"];
OH -> CO2H3CO3 [label = "CO2H3CO3H (G4455)"];
OH -> Cl [label = "CH3CCl3 (G6408)"];
OH -> Cl [label = "CH3Cl (G6406)"];
OH -> Cl [label = "ClO (G6203)"];
OH -> Cl [label = "HCl (G6205)"];
OH -> ClO [label = "HOCl (G6206)"];
OH -> DMSO [label = "DMS (G9400b)"];
OH -> GLYOX [label = "C2H2 (G4222)"];
OH -> GLYOX [label = "HOCH2CHO (G4223)"];
OH -> H [label = "CO (G4110)"];
OH -> H [label = "H2 (G2105)"];
OH -> H [label = "Hg (G10200)"];
OH -> H [label = "O3P (G2103)"];
OH -> H2O [label = "ACETOL (G4316)"];
OH -> H2O [label = "C2H5OOH (G4207)"];
OH -> H2O [label = "C2H6 (G4200)"];
OH -> H2O [label = "C3H8 (G4300)"];
OH -> H2O [label = "CH2Br2 (G7408)"];
OH -> H2O [label = "CH2ClBr (G7607)"];
OH -> H2O [label = "CH3Br (G7403)"];
OH -> H2O [label = "CH3CCl3 (G6408)"];
OH -> H2O [label = "CH3CHO (G4208)"];
OH -> H2O [label = "CH3CO2H (G4210)"];
OH -> H2O [label = "CH3CO3H (G4218)"];
OH -> H2O [label = "CH3COCH3 (G4311)"];
OH -> H2O [label = "CH3Cl (G6406)"];
OH -> H2O [label = "CH3OOH (G4107)"];
OH -> H2O [label = "CH4 (G4101)"];
OH -> H2O [label = "CHBr3 (G7407)"];
OH -> H2O [label = "CHCl2Br (G7605)"];
OH -> H2O [label = "CHClBr2 (G7606)"];
OH -> H2O [label = "ETHGLY (G4248)"];
OH -> H2O [label = "ETHOHNO3 (G4245)"];
OH -> H2O [label = "GLYOX (G4234)"];
OH -> H2O [label = "H2 (G2105)"];
OH -> H2O [label = "H2O2 (G2112)"];
OH -> H2O [label = "HBr (G7202)"];
OH -> H2O [label = "HCHO (G4108)"];
OH -> H2O [label = "HCOCO2H (G4240)"];
OH -> H2O [label = "HCOCO3H (G4241)"];
OH -> H2O [label = "HCOOH (G4111)"];
OH -> H2O [label = "HCl (G6205)"];
OH -> H2O [label = "HI (G8202)"];
OH -> H2O [label = "HNO (G3219)"];
OH -> H2O [label = "HNO3 (G3206)"];
OH -> H2O [label = "HNO4 (G3208)"];
OH -> H2O [label = "HO2 (G2109)"];
OH -> H2O [label = "HOCH2CHO (G4223)"];
OH -> H2O [label = "HOCH2CO2H (G4230)"];
OH -> H2O [label = "HOCH2CO3H (G4231)"];
OH -> H2O [label = "HOCl (G6206)"];
OH -> H2O [label = "HONO (G3205)"];
OH -> H2O [label = "HYETHO2H (G4246a)"];
OH -> H2O [label = "HYETHO2H (G4246b)"];
OH -> H2O [label = "HYPERACET (G4315a)"];
OH -> H2O [label = "HYPERACET (G4315b)"];
OH -> H2O [label = "IC3H7OOH (G4307)"];
OH -> H2O [label = "LC4H9NO3 (G4417)"];
OH -> H2O [label = "LC4H9OOH (G4404)"];
OH -> H2O [label = "LMEKOOH (G4416)"];
OH -> H2O [label = "MEK (G4413)"];
OH -> H2O [label = "NC4H10 (G4400)"];
OH -> H2O [label = "NH2OH (G3223)"];
OH -> H2O [label = "NH3 (G3209)"];
OH -> H2O [label = "NHOH (G3222)"];
OH -> H2O [label = "PAN (G4220)"];
OH -> H2O [label = "PHAN (G4233)"];
OH -> H2SO4 [label = "SO2 (G9200)"];
OH -> HCHO [label = "CH3OH (G4102)"];
OH -> HCHO [label = "CH3OOH (G4107)"];
OH -> HCHO [label = "DMS (G9400a)"];
OH -> HCHO [label = "DMSO (G9402)"];
OH -> HCHO [label = "HOCH2CO2H (G4230)"];
OH -> HCHO [label = "ISOPBNO3 (G4523)"];
OH -> HCHO [label = "ISOPBOH (G4522)"];
OH -> HCHO [label = "MACO2H (G4435)"];
OH -> HCHO [label = "MACROH (G4434)"];
OH -> HCHO [label = "PAN (G4220)"];
OH -> HCHO [label = "PHAN (G4233)"];
OH -> HCOC5 [label = "ISOPDNO3 (G4530)"];
OH -> HCOC5 [label = "ISOPDOH (G4529)"];
OH -> HCOC5 [label = "ISOPDOOH (G4528)"];
OH -> HCOCO3 [label = "GLYOX (G4234)"];
OH -> HCOCO3 [label = "HCOCO3H (G4241)"];
OH -> HCOOH [label = "C2H2 (G4222)"];
OH -> HCl [label = "ClO (G6203)"];
OH -> HIO3 [label = "OIO (G8203)"];
OH -> HNO [label = "NHOH (G3222)"];
OH -> HNO3 [label = "NO2 (G3202)"];
OH -> HO12CO3C4 [label = "LC5PAN1719 (G4559)"];
OH -> HO12CO3C4 [label = "LMVKOHABOOH (G4448)"];
OH -> HO2 [label = "ACETOL (G4316)"];
OH -> HO2 [label = "C2H2 (G4222)"];
OH -> HO2 [label = "C3H8 (G4300)"];
OH -> HO2 [label = "CH3OH (G4102)"];
OH -> HO2 [label = "ClO (G6203)"];
OH -> HO2 [label = "DMS (G9400b)"];
OH -> HO2 [label = "DMSO (G9402)"];
OH -> HO2 [label = "ETHGLY (G4248)"];
OH -> HO2 [label = "GLYOX (G4234)"];
OH -> HO2 [label = "H2O2 (G2112)"];
OH -> HO2 [label = "HCHO (G4108)"];
OH -> HO2 [label = "HCOCO2H (G4240)"];
OH -> HO2 [label = "HCOOH (G4111)"];
OH -> HO2 [label = "HO12CO3C4 (G4456)"];
OH -> HO2 [label = "HOCH2CHO (G4223)"];
OH -> HO2 [label = "HOCH2CO2H (G4230)"];
OH -> HO2 [label = "ISOPAOH (G4515)"];
OH -> HO2 [label = "ISOPBOH (G4522)"];
OH -> HO2 [label = "ISOPDOH (G4529)"];
OH -> HO2 [label = "LHC4ACCO2H (G4556)"];
OH -> HO2 [label = "MACROH (G4434)"];
OH -> HO2 [label = "O3 (G2104)"];
OH -> HO2 [label = "SO2 (G9200)"];
OH -> HOBr [label = "Br2 (G7204)"];
OH -> HOCH2CH2O2 [label = "C2H4 (G4202)"];
OH -> HOCH2CH2O2 [label = "HYETHO2H (G4246a)"];
OH -> HOCH2CHO [label = "ETHGLY (G4248)"];
OH -> HOCH2CHO [label = "ETHOHNO3 (G4245)"];
OH -> HOCH2CHO [label = "HYETHO2H (G4246b)"];
OH -> HOCH2CHO [label = "LHC4ACCO2H (G4556)"];
OH -> HOCH2CO3 [label = "HOCH2CHO (G4223)"];
OH -> HOCH2CO3 [label = "HOCH2CO3H (G4231)"];
OH -> HOCH2CO3 [label = "HOCH2COCHO (G4333)"];
OH -> HOCH2CO3 [label = "HOCH2COCO2H (G4335)"];
OH -> HOI [label = "I2 (G8204)"];
OH -> HONO [label = "NO (G3200)"];
OH -> HYPROPO2 [label = "C3H6 (G4302)"];
OH -> HYPROPO2 [label = "HYPROPO2H (G4326a)"];
OH -> HgO [label = "Hg (G10200)"];
OH -> I [label = "C3H7I (G8400)"];
OH -> I [label = "HI (G8202)"];
OH -> I [label = "I2 (G8204)"];
OH -> IC3H7O2 [label = "C3H8 (G4300)"];
OH -> IC3H7O2 [label = "IC3H7OOH (G4307)"];
OH -> ISOPBO2 [label = "C5H8 (G4501)"];
OH -> ISOPBO2 [label = "ISOPBOOH (G4521)"];
OH -> ISOPDO2 [label = "C5H8 (G4501)"];
OH -> LC4H9O2 [label = "LC4H9OOH (G4404)"];
OH -> LC4H9O2 [label = "NC4H10 (G4400)"];
OH -> LC578O2 [label = "LC578OOH (G4550)"];
OH -> LC578O2 [label = "LHC4ACCHO (G4543)"];
OH -> LHC4ACCHO [label = "ISOPAOH (G4515)"];
OH -> LHC4ACCHO [label = "LISOPACNO3 (G4516)"];
OH -> LHC4ACCHO [label = "LISOPACOOH (G4514)"];
OH -> LHC4ACCO3 [label = "LHC4ACCHO (G4543)"];
OH -> LHC4ACCO3 [label = "LHC4ACCO3H (G4557)"];
OH -> LHMVKABO2 [label = "MVK (G4406)"];
OH -> LISOPACO2 [label = "C5H8 (G4501)"];
OH -> LMEKO2 [label = "LMEKOOH (G4416)"];
OH -> LMEKO2 [label = "MEK (G4413)"];
OH -> LMVKOHABO2 [label = "MVKOH (G4442)"];
OH -> LNISO3 [label = "LNISOOH (G4542)"];
OH -> LNISO3 [label = "NC4CHO (G4536)"];
OH -> MACO3 [label = "MACO3H (G4436)"];
OH -> MACO3 [label = "MACR (G4421)"];
OH -> MACRO2 [label = "MACR (G4421)"];
OH -> MACRO2 [label = "MACROOH (G4433)"];
OH -> MACROH [label = "LC5PAN1719 (G4559)"];
OH -> MEK [label = "LC4H9NO3 (G4417)"];
OH -> MEK [label = "LC4H9OOH (G4404)"];
OH -> MGLYOX [label = "ACETOL (G4316)"];
OH -> MGLYOX [label = "HYPERACET (G4315b)"];
OH -> MGLYOX [label = "NOA (G4332)"];
OH -> MVK [label = "ISOPBNO3 (G4523)"];
OH -> MVK [label = "ISOPBOH (G4522)"];
OH -> MVKOH [label = "ISOPBOH (G4522)"];
OH -> NC4CHO [label = "NISOPOOH (G4535)"];
OH -> NH2 [label = "NH3 (G3209)"];
OH -> NHOH [label = "NH2OH (G3223)"];
OH -> NO [label = "HNO (G3219)"];
OH -> NO2 [label = "ETHOHNO3 (G4245)"];
OH -> NO2 [label = "HNO4 (G3208)"];
OH -> NO2 [label = "HONO (G3205)"];
OH -> NO2 [label = "IC3H7NO3 (G4320)"];
OH -> NO2 [label = "ISOPBNO3 (G4523)"];
OH -> NO2 [label = "ISOPDNO3 (G4530)"];
OH -> NO2 [label = "LC4H9NO3 (G4417)"];
OH -> NO2 [label = "LC5PAN1719 (G4559)"];
OH -> NO2 [label = "LISOPACNO3 (G4516)"];
OH -> NO2 [label = "MPAN (G4418)"];
OH -> NO2 [label = "NOA (G4332)"];
OH -> NO2 [label = "PAN (G4220)"];
OH -> NO2 [label = "PHAN (G4233)"];
OH -> NO3 [label = "HNO3 (G3206)"];
OH -> NOA [label = "PR2O2HNO3 (G4330b)"];
OH -> O2 [label = "ClO (G6203)"];
OH -> O2 [label = "HO2 (G2109)"];
OH -> O2 [label = "O3 (G2104)"];
OH -> O2 [label = "O3P (G2103)"];
OH -> OH [label = "C2H2 (G4222)"];
OH -> OH [label = "C2H5OOH (G4207)"];
OH -> OH [label = "CH3OOH (G4107)"];
OH -> OH [label = "HYETHO2H (G4246b)"];
OH -> OH [label = "HYPERACET (G4315b)"];
OH -> OH [label = "HYPROPO2H (G4326b)"];
OH -> OH [label = "IC3H7OOH (G4307)"];
OH -> OH [label = "ISOPDOOH (G4528)"];
OH -> OH [label = "LC4H9OOH (G4404)"];
OH -> OH [label = "LHMVKABOOH (G4441)"];
OH -> OH [label = "LISOPACOOH (G4514)"];
OH -> OH [label = "LMEKOOH (G4416)"];
OH -> OH [label = "LMVKOHABOOH (G4448)"];
OH -> OH [label = "NISOPOOH (G4535)"];
OH -> OH [label = "PR2O2HNO3 (G4330b)"];
OH -> OH_a01 [label = " (H2100f_a01)"];
OH -> PRONO3BO2 [label = "PR2O2HNO3 (G4330a)"];
OH -> SO2 [label = "DMSO (G9402)"];
OH_a01 -> OH [label = " (H2100b_a01)"];
PR2O2HNO3 -> HO2 [label = "hv (J4310)"];
PR2O2HNO3 -> OH [label = "OH (G4330b)"];
PR2O2HNO3 -> OH [label = "hv (J4310)"];
PRONO3BO2 -> HO2 [label = "NO (G4328)"];
PRONO3BO2 -> HO2 [label = "NO3 (G4329)"];
SO2 -> HO2 [label = "OH (G9200)"];
}
