# Supplementary material for: The atmospheric chemistry box model CAABA/MECCA-3.0
Source: Copernicus journal article supplement (doi:10.5194/gmd-4-373-2011), 2011-05-06
Supplement: Supplementary file 9 [file gmd-4-373-2011-supplement.zip › caaba_3.0/mecca/graphviz/xgraphviz]

#! /bin/tcsh -f

if ( $1 == "" ) then
  echo "example usage:"
  echo "  ./xgraphviz C1.spc C.spc both"
  exit
endif

set spc1file  = $1
set spc2file  = $2
set labeltype = $3

set eqnfile  = ../mecca.eqn
set basename = $spc1file:r # remove suffix with ":r"
set dotfile  = $basename.dot
set pdffile  = $basename.pdf

echo "// Created automatically by xgraphviz, DO NOT EDIT\!" > $dotfile
echo "creating $pdffile ..."

# create dependencies with awk script:
# for strange reasons, gawk only works properly if LC_ALL = C
setenv LC_ALL C
gawk -f eqn2dot.awk -v spc1file="$spc1file" -v spc2file="$spc2file" -v labeltype="$labeltype" $eqnfile

# create inputfile for graphviz:
echo "digraph $basename {" >> $dotfile
echo '  concentrate=true;' >> $dotfile
echo '  rankdir=LR;'       >> $dotfile
echo '  size="8,8";'       >> $dotfile

echo '"'$basename'\\nchemistry"'     >> $dotfile
echo '  [shape=box, fontsize=30,'    >> $dotfile
echo '  style="filled", color=red];' >> $dotfile

echo 'subgraph species {' >> $dotfile
echo 'node[shape=oval,'   >> $dotfile
echo '  color=yellow,'    >> $dotfile
echo '  style="filled"];' >> $dotfile
# # for strange reasons, gawk only works properly if LC_ALL = C
# setenv LC_ALL C
# grep -E '^ *[A-Za-z0-9_]+' $spc1file \
#   | sed 's|[^A-Za-z0-9_].*||' \
#   | sed 's|$|;|' >> $dotfile
sort node.dot | uniq >> $dotfile
echo '}' >> $dotfile

sort depend.dot | uniq >> $dotfile
echo '}'               >> $dotfile

# run graphviz:
dot -Tps2 -o tmp_1.ps $dotfile
# svg output is not satisfying:
#dot -Tsvg -o tmp_1.svg $dotfile

ps2pdf -f tmp_1.ps $pdffile

# cleanup:
rm node.dot depend.dot tmp_*.ps

exit
