# Supplementary material for: The atmospheric chemistry box model CAABA/MECCA-3.0
Source: Copernicus journal article supplement (doi:10.5194/gmd-4-373-2011), 2011-05-06
Supplement: Supplementary file 9 [file gmd-4-373-2011-supplement.zip › caaba_3.0/mecca/graphviz/xgraphvizall]

#! /bin/tcsh -f

# for strange reasons, gawk only works properly if LC_ALL = C
setenv LC_ALL C
gawk -f spc_extract.awk ../mecca.spc

./xgraphviz     C1.spc   C.spc both
./xgraphviz     C2.spc   C.spc both
./xgraphviz     C3.spc   C.spc both
./xgraphviz     C4.spc   C.spc both
./xgraphviz     C5.spc   C.spc both

./xgraphviz     Cl.spc  Cl.spc both
./xgraphviz     Br.spc  Br.spc both
./xgraphviz      I.spc   I.spc both

./xgraphviz OH_HO2.spc all.spc both

exit
