# Supplementary material for: The atmospheric chemistry box model CAABA/MECCA-3.0
Source: Copernicus journal article supplement (doi:10.5194/gmd-4-373-2011), 2011-05-06
Supplement: Supplementary file 9 [file gmd-4-373-2011-supplement.zip › caaba_3.0/mecca/kpp/cflags.guess]

#!/bin/sh
UNAME_MACHINE=`(uname -m) 2>/dev/null` || UNAME_MACHINE=unknown
UNAME_RELEASE=`(uname -r) 2>/dev/null` || UNAME_RELEASE=unknown
UNAME_SYSTEM=`(uname -s) 2>/dev/null` || UNAME_SYSTEM=unknown
UNAME_VERSION=`(uname -v) 2>/dev/null` || UNAME_VERSION=unknown

CC=cc
if [ x$1 != x ]; then CC=$1; fi

exec 5>./cflags

# Note: order is significant - the case branches are not exclusive.

case "${UNAME_MACHINE}:${UNAME_SYSTEM}:${UNAME_RELEASE}:${UNAME_VERSION}:${CC}" in

    *:HP-UX:*:*:cc*) # For HP-UX workstations
        echo " -Aa -D_HPUX_SOURCE " 1>&5; exit 0 ;;

    *:AIX:*:*:cc*) # For machines running AIX
        echo " -Aa " 1>&5; exit 0 ;;

    *:IRIX:*:*:cc*) # For machines running IRIX
        echo " " 1>&5; exit 0 ;;

    *:IRIX64:*:*:cc*) # For machines running IRIX64 
        echo " " 1>&5; exit 0 ;;

    *:Linux:*:*:cc*) # For Linux machines
        echo " " 1>&5; exit 0 ;;

    *:SunOS:*:*:cc*) # For SUN machines
        echo " Please use gcc compiler on SUN machines."; exit 1 ;;

    *:*:*:*:gcc*) # this is the default case, for gcc
        echo " " 1>&5; exit 0 ;;

    *:*:*:*:*) # this is the default case
        echo " " 1>&5; exit 0 ;;
esac
