# Supplementary material for: The atmospheric chemistry box model CAABA/MECCA-3.0
Source: Copernicus journal article supplement (doi:10.5194/gmd-4-373-2011), 2011-05-06
Supplement: Supplementary file 9 [file gmd-4-373-2011-supplement.zip › caaba_3.0/mecca/kpp/CHANGELOG]

******************************************************************************
**                                KPP history                               **
******************************************************************************

the next version will be:
kpp-2.2.1_rs2 (2008)

CHANGES by Patrick Joeckel:

- Makefile, Makefile.defs: ...............

CHANGES by Rolf Sander:

- src/code_f90.c: maximum number of continuation lines increased to 100.
  if MAX_NO_OF_LINES is too small, kpp may split lines incorrectly.

- int/rosenbrock_posdef.f90: IERR_NAMES adapted to correct syntax

******************************************************************************

kpp-2.2.1_rs (22 Aug 2007)

CHANGES by Rolf Sander:

- code_f90.c: added FlushBuf() to F90_DeclareData (otherwise MAX_OUTBUF
  would have to be very large for large reaction mechanisms)

- gen.c: The declaration of RTOLS was deleted because it is not needed
  by the integrators. If the driver programs need it, they can define it
  themselves.

- Makefile: new option maintainer-clean is now consistent with
  src/Makefile

- src/code_f90.c: string lengths increased to allow slightly longer
  species' names

CHANGES by Adrian Sandu and Rolf Sander:

- It looks like the model is hypersensitive to negative concentrations;
  many times when small negative concentrations are produced the entire
  future trajectory is put in jeopardy. In the new integrator
  rosenbrock_posdef.f90, this is fixed by changing "CALL
  WCOPY(N,Ynew,1,Y,1)" to "Y = MAX(Ynew,ZERO)".

******************************************************************************

kpp-2.2.1 (Jul 2006)

CHANGES by Adrian Sandu:

- rosenbrock_soa deleted

- util/sutil.c: new subroutine KppDecompCmplxR

- new files: examples/cell.kpp, examples/saprc2006.kpp,
  int/runge_kutta.c, and int/sdirk.c

CHANGES by Rolf Sander:

- int/kpp_lsode.f90: like all other integrators, kpp_lsode now also
  returns IERR==1 after successful completion

CHANGES by Adrian Sandu and Rolf Sander:

- src/Makefile, scan.l, scan.y: yacc replaced by bison, implementing the
  bug fixes suggested by Jason Lander

******************************************************************************

kpp-2.2_July2006 (Jul 2006)

CHANGES by Adrian Sandu:

- models/CMAQ added

- changes in int/runge_kutta_adj.f90 and int/runge_kutta_tlm.f90

- util/blas.c: new subroutines Set2Zero and WADD

- util/blas.f90: new subroutines WGEFA and WGESL

- util/sutil.f90: new subroutines KppDecompCmplxR, KppSolveCmplxR, and
  KppSolveTRCmplxR

******************************************************************************

kpp-2.2.June2006 (Jun 2006)

CHANGES by Philipp Miehe and Adrian Sandu:

- new integrators kpp_sdirk4, rosenbrock_soa, runge_kutta, and sdirk

- integrators rosenbrock, rosenbrock_tlm, and rosenbrock_adj: completely
  revised

- new kpp command #DECLARE [SYMBOL|VALUE]

- util/blas.f90: new subroutine WADD

- util/sutil.f90: new subroutines KppSolveTRIndirect and KppSolveTRCmplx

- several files examples/* added

- changes in drv/general_adj.f90 and drv/general_tlm.f90

- examples/mimi* deleted

******************************************************************************

kpp-2.1 ()

******************************************************************************
