# Supplementary material for: The atmospheric chemistry box model CAABA/MECCA-3.0
Source: Copernicus journal article supplement (doi:10.5194/gmd-4-373-2011), 2011-05-06
Supplement: Supplementary file 9 [file gmd-4-373-2011-supplement.zip › caaba_3.0/mecca/kpp/examples/saprc_m.kpp]

#MODEL      saprc99
#INTEGRATOR none 
#LANGUAGE   Matlab 
#DRIVER     general 
#HESSIAN    on
#STOICMAT   on
