# Supplementary material for: The atmospheric chemistry box model CAABA/MECCA-3.0
Source: Copernicus journal article supplement (doi:10.5194/gmd-4-373-2011), 2011-05-06
Supplement: Supplementary file 9 [file gmd-4-373-2011-supplement.zip › caaba_3.0/mecca/kpp/int/atm_odessa_ddm.def]

 
#FUNCTION AGGREGATE
#JACOBIAN FULL
#DOUBLE ON 
#INTFILE atm_odessa_ddm

#INLINE F77_GLOBAL
      INTEGER Autonomous
      COMMON /INTGDATA/ Autonomous
      REAL*8 STEPSTART
      COMMON /GDATA/ STEPSTART
#ENDINLINE

#INLINE F77_INIT
        STEPMIN=0.0001
        STEPMAX=3600.
        Autonomous = 0
        STEPSTART=STEPMIN
#ENDINLINE


#INLINE C_GLOBAL
extern int Autonomous;
extern double STEPSTART;
#ENDINLINE

#INLINE C_DATA_INT
int Autonomous;
double STEPSTART;
#ENDINLINE


#INLINE C_INIT
        STEPMIN=0.0001;
        STEPMAX=3600.0;
        Autonomous = 0;
        STEPSTART=STEPMIN;
#ENDINLINE
