# Supplementary material for: The atmospheric chemistry box model CAABA/MECCA-3.0
Source: Copernicus journal article supplement (doi:10.5194/gmd-4-373-2011), 2011-05-06
Supplement: Supplementary file 9 [file gmd-4-373-2011-supplement.zip › caaba_3.0/mecca/kpp/int/gillespie.def]

 
#FUNCTION   aggregate
#JACOBIAN   SPARSE_LU_ROW
#DOUBLE     on 
#STOCHASTIC on 
#INTFILE    gillespie
