# Supplementary material for: The atmospheric chemistry box model CAABA/MECCA-3.0
Source: Copernicus journal article supplement (doi:10.5194/gmd-4-373-2011), 2011-05-06
Supplement: Supplementary file 9 [file gmd-4-373-2011-supplement.zip › caaba_3.0/mecca/kpp/int/oldies/ros3.def]

 
#FUNCTION AGGREGATE
#JACOBIAN SPARSE_LU_ROW

#DOUBLE ON 
#INTFILE ros3

#INLINE F77_DECL_INT
      INTEGER Autonomous
      COMMON /INTGDATA/ Autonomous
      REAL*8 STEPSTART
      COMMON /GDATA/ STEPSTART
#ENDINLINE

#INLINE F77_INIT_INT
        STEPMIN=0.0001
        STEPMAX=3600.
        Autonomous = 0
        STEPSTART=STEPMIN
#ENDINLINE


#INLINE F90_DECL_INT
      INTEGER Autonomous
      DOUBLE PRECISION STEPSTART
#ENDINLINE

#INLINE F90_INIT_INT
        STEPMIN=0.0001
        STEPMAX=3600.
        Autonomous = 0
        STEPSTART=STEPMIN
#ENDINLINE

#INLINE C_DECL_INT
  int Autonomous;
  double STEPSTART;
#ENDINLINE

#INLINE C_INIT_INT
  STEPMIN=1e-4;
  STEPMAX=3600.;
  Autonomous = 0;
  STEPSTART=STEPMIN;
#ENDINLINE
