# Supplementary material for: The atmospheric chemistry box model CAABA/MECCA-3.0
Source: Copernicus journal article supplement (doi:10.5194/gmd-4-373-2011), 2011-05-06
Supplement: Supplementary file 9 [file gmd-4-373-2011-supplement.zip › caaba_3.0/mecca/kpp/int/oldies/ros4_ddm.def]

 
#FUNCTION AGGREGATE
#JACOBIAN SPARSE_LU_ROW

#DOUBLE ON 
#INTFILE ros4_ddm
#HESSIAN ON 

#INLINE F77_DECL_INT
      INTEGER Autonomous
      COMMON /INTGDATA/ Autonomous
      REAL*8 STEPSTART
      COMMON /GDATA/ STEPSTART
#ENDINLINE

#INLINE F77_INIT_INT
        STEPMIN=1.0E-4
        STEPMAX=3600.
        Autonomous = 0
        STEPSTART=STEPMIN
#ENDINLINE

#INLINE F90_DECL_INT
      INTEGER Autonomous
      DOUBLE PRECISION STEPSTART
#ENDINLINE

#INLINE F90_INIT_INT
        STEPMIN=1.0E-4
        STEPMAX=3600.
        Autonomous = 0
        STEPSTART=STEPMIN
#ENDINLINE


#INLINE C_DECL_INT
    extern int Autonomous;
    extern double STEPSTART;
#ENDINLINE
 
#INLINE C_DATA_INT
    int Autonomous;
    double STEPSTART;
#ENDINLINE

#INLINE C_INIT_INT
        STEPMIN = 0.0001;
        STEPMAX = 3600.0;
        Autonomous = 0;
        STEPSTART = STEPMIN;
#ENDINLINE                                                                     

#INLINE MATLAB_INIT_INT
        STEPMIN = 0.0001;
        STEPMAX = 3600.0;
        Autonomous = 0;
        STEPSTART = STEPMIN;
#ENDINLINE                                                                     
