# Supplementary material for: The atmospheric chemistry box model CAABA/MECCA-3.0
Source: Copernicus journal article supplement (doi:10.5194/gmd-4-373-2011), 2011-05-06
Supplement: Supplementary file 9 [file gmd-4-373-2011-supplement.zip › caaba_3.0/mecca/kpp/int/oldies/twostepj.def]

 
#FUNCTION SPLIT
#JACOBIAN OFF
#SPARSEDATA OFF
#DOUBLE ON
#INTFILE twostepj

#INLINE F_INIT_INT
        STEPMIN=0.0001
        STEPMAX=60.
#ENDINLINE

#INLINE C_INIT_INT
  STEPMIN=0.0001;
  STEPMAX=60.;
#ENDINLINE
