# Supplementary material for: The atmospheric chemistry box model CAABA/MECCA-3.0
Source: Copernicus journal article supplement (doi:10.5194/gmd-4-373-2011), 2011-05-06
Supplement: Supplementary file 9 [file gmd-4-373-2011-supplement.zip › caaba_3.0/mecca/kpp/int/ros3_old.def]

#FUNCTION AGGREGATE
#JACOBIAN SPARSE_LU_ROW

#DOUBLE ON 
#INTFILE ros3_old

#INLINE F77_GLOBAL
      INTEGER ISNOTAUTONOM
      COMMON /INTGDATA/ ISNOTAUTONOM
      REAL*8 STEPSTART
      COMMON /GDATA/ STEPSTART
#ENDINLINE

#INLINE F77_INIT
        STEPMIN=0.0001
        STEPMAX=3600.
        ISNOTAUTONOM=1
        STEPSTART=STEPMIN
#ENDINLINE
