# Supplementary material for: The atmospheric chemistry box model CAABA/MECCA-3.0
Source: Copernicus journal article supplement (doi:10.5194/gmd-4-373-2011), 2011-05-06
Supplement: Supplementary file 9 [file gmd-4-373-2011-supplement.zip › caaba_3.0/mecca/kpp/int/rosenbrock_adj.f90]

!~~~~~~~~~~~~~~~~~~~~~~~~~~~~~~~~~~~~~~~~~~~~~~~~~~~~~~~~~~~~~~~~~~~~~~~~~!
!  Discrete adjoints of Rosenbrock,                                       !
!           for several Rosenbrock methods:                               !
!               * Ros2                                                    !
!               * Ros3                                                    !
!               * Ros4                                                    !
!               * Rodas3                                                  !
!               * Rodas4                                                  !
!  By default the code employs the KPP sparse linear algebra routines     !
!  Compile with -DFULL_ALGEBRA to use full linear algebra (LAPACK)        !
!                                                                         !
!    (C)  Adrian Sandu, August 2004                                       !
!    Virginia Polytechnic Institute and State University                  !
!    Contact: sandu@cs.vt.edu                                             !
!    Revised by Philipp Miehe and Adrian Sandu, May 2006                  ! 
!    This implementation is part of KPP - the Kinetic PreProcessor        !
!~~~~~~~~~~~~~~~~~~~~~~~~~~~~~~~~~~~~~~~~~~~~~~~~~~~~~~~~~~~~~~~~~~~~~~~~~!

MODULE KPP_ROOT_Integrator

   USE KPP_ROOT_Precision
   USE KPP_ROOT_Parameters
   USE KPP_ROOT_Global
   USE KPP_ROOT_LinearAlgebra
   USE KPP_ROOT_Rates
   USE KPP_ROOT_Function
   USE KPP_ROOT_Jacobian
   USE KPP_ROOT_Hessian
   USE KPP_ROOT_Util
   
   IMPLICIT NONE
   PUBLIC
   SAVE
  
!~~~>  Statistics on the work performed by the Rosenbrock method
   INTEGER, PARAMETER :: Nfun=1, Njac=2, Nstp=3, Nacc=4, &
                         Nrej=5, Ndec=6, Nsol=7, Nsng=8, &
                         Ntexit=1, Nhexit=2, Nhnew = 3


CONTAINS ! Routines in the module KPP_ROOT_Integrator


!~~~~~~~~~~~~~~~~~~~~~~~~~~~~~~~~~~~~~~~~~~~~~~~~~~~~~~~~~~~~~~~~~~~~~~~~~~~~
SUBROUTINE INTEGRATE_ADJ( NADJ, Y, Lambda, TIN, TOUT, &
           ATOL_adj, RTOL_adj,                        &
           ICNTRL_U, RCNTRL_U, ISTATUS_U, RSTATUS_U )
!~~~~~~~~~~~~~~~~~~~~~~~~~~~~~~~~~~~~~~~~~~~~~~~~~~~~~~~~~~~~~~~~~~~~~~~~~~~~

   IMPLICIT NONE        
    
!~~~> Y - Concentrations
   KPP_REAL  :: Y(NVAR)
!~~~> NADJ - No. of cost functionals for which adjoints
!                are evaluated simultaneously
!            If single cost functional is considered (like in
!                most applications) simply set NADJ = 1      
   INTEGER NADJ
!~~~> Lambda - Sensitivities w.r.t. concentrations
!     Note: Lambda (1:NVAR,j) contains sensitivities of
!           the j-th cost functional w.r.t. Y(1:NVAR), j=1...NADJ
   KPP_REAL  :: Lambda(NVAR,NADJ)
   KPP_REAL, INTENT(IN)  :: TIN  ! TIN  - Start Time
   KPP_REAL, INTENT(IN)  :: TOUT ! TOUT - End Time
!~~~> Tolerances for adjoint calculations
!     (used only for full continuous adjoint)   
   KPP_REAL, INTENT(IN)  :: ATOL_adj(NVAR,NADJ), RTOL_adj(NVAR,NADJ)
!~~~> Optional input parameters and statistics
   INTEGER,       INTENT(IN),  OPTIONAL :: ICNTRL_U(20)
   KPP_REAL, INTENT(IN),  OPTIONAL :: RCNTRL_U(20)
   INTEGER,       INTENT(OUT), OPTIONAL :: ISTATUS_U(20)
   KPP_REAL, INTENT(OUT), OPTIONAL :: RSTATUS_U(20)

   KPP_REAL :: RCNTRL(20), RSTATUS(20)
   INTEGER       :: ICNTRL(20), ISTATUS(20), IERR

   INTEGER, SAVE :: Ntotal


   ICNTRL(1:20)  = 0
   RCNTRL(1:20)  = 0.0_dp
   ISTATUS(1:20) = 0
   RSTATUS(1:20) = 0.0_dp
   
   
!~~~> fine-tune the integrator:
!   ICNTRL(1) = 0       ! 0 = non-autonomous, 1 = autonomous
!   ICNTRL(2) = 1       ! 0 = scalar, 1 = vector tolerances
!   RCNTRL(3) = STEPMIN ! starting step
!   ICNTRL(3) = 5       ! choice of the method for forward integration
!   ICNTRL(6) = 1       ! choice of the method for continuous adjoint
!   ICNTRL(7) = 2       ! 1=none, 2=discrete, 3=full continuous, 4=simplified continuous adjoint
!   ICNTRL(8) = 1       ! Save fwd LU factorization: 0 = *don't* save, 1 = save


   ! if optional parameters are given, and if they are >=0, then they overwrite default settings
   IF (PRESENT(ICNTRL_U)) THEN
     WHERE(ICNTRL_U(:) >= 0) ICNTRL(:) = ICNTRL_U(:)
   END IF
   IF (PRESENT(RCNTRL_U)) THEN
     WHERE(RCNTRL_U(:) >= 0) RCNTRL(:) = RCNTRL_U(:)
   END IF

   
   CALL RosenbrockADJ(Y, NADJ, Lambda,                 &
         TIN, TOUT,                                    &
         ATOL, RTOL, ATOL_adj, RTOL_adj,               &
         RCNTRL, ICNTRL, RSTATUS, ISTATUS, IERR)


!~~~> Debug option: show number of steps
!    Ntotal = Ntotal + ISTATUS(Nstp)
!    WRITE(6,777) ISTATUS(Nstp),Ntotal,VAR(ind_O3),VAR(ind_NO2)
!777 FORMAT('NSTEPS=',I6,' (',I6,')  O3=',E24.14,'  NO2=',E24.14)    

   IF (IERR < 0) THEN
     print *,'RosenbrockADJ: Unsucessful step at T=',  &
         TIN,' (IERR=',IERR,')'
   END IF

   STEPMIN = RSTATUS(Nhexit)
   ! if optional parameters are given for output 
   !         copy to them to return information
   IF (PRESENT(ISTATUS_U)) ISTATUS_U(:) = ISTATUS(:)
   IF (PRESENT(RSTATUS_U)) RSTATUS_U(:) = RSTATUS(:)

END SUBROUTINE INTEGRATE_ADJ


!~~~~~~~~~~~~~~~~~~~~~~~~~~~~~~~~~~~~~~~~~~~~~~~~~~~~~~~~~~~~~~~~~~~~~~
SUBROUTINE RosenbrockADJ( Y, NADJ, Lambda,             &
           Tstart, Tend,                               &
           AbsTol, RelTol, AbsTol_adj, RelTol_adj,     &
           RCNTRL, ICNTRL, RSTATUS, ISTATUS, IERR)
!~~~~~~~~~~~~~~~~~~~~~~~~~~~~~~~~~~~~~~~~~~~~~~~~~~~~~~~~~~~~~~~~~~~~~~
!   
!    ADJ = Adjoint of the Tangent Linear Model of a Rosenbrock Method
!
!    Solves the system y'=F(t,y) using a RosenbrockADJ method defined by:
!
!     G = 1/(H*gamma(1)) - Jac(t0,Y0)
!     T_i = t0 + Alpha(i)*H
!     Y_i = Y0 + \sum_{j=1}^{i-1} A(i,j)*K_j
!     G * K_i = Fun( T_i, Y_i ) + \sum_{j=1}^S C(i,j)/H * K_j +
!         gamma(i)*dF/dT(t0, Y0)
!     Y1 = Y0 + \sum_{j=1}^S M(j)*K_j 
!
!    For details on RosenbrockADJ methods and their implementation consult:
!      E. Hairer and G. Wanner
!      "Solving ODEs II. Stiff and differential-algebraic problems".
!      Springer series in computational mathematics, Springer-Verlag, 1996.  
!    The codes contained in the book inspired this implementation.       
!
!    (C)  Adrian Sandu, August 2004
!    Virginia Polytechnic Institute and State University    
!    Contact: sandu@cs.vt.edu
!    Revised by Philipp Miehe and Adrian Sandu, May 2006                   
!    This implementation is part of KPP - the Kinetic PreProcessor
!~~~~~~~~~~~~~~~~~~~~~~~~~~~~~~~~~~~~~~~~~~~~~~~~~~~~~~~~~~~~~~~~~~~~~~
!    
!~~~>   INPUT ARGUMENTS: 
!    
!-     Y(NVAR)    = vector of initial conditions (at T=Tstart)
!      NADJ       -> dimension of linearized system, 
!                   i.e. the number of sensitivity coefficients
!-     Lambda(NVAR,NADJ) -> vector of initial sensitivity conditions (at T=Tstart)
!-    [Tstart,Tend]  = time range of integration
!     (if Tstart>Tend the integration is performed backwards in time)  
!-    RelTol, AbsTol = user precribed accuracy
!- SUBROUTINE Fun( T, Y, Ydot ) = ODE function, 
!                       returns Ydot = Y' = F(T,Y) 
!- SUBROUTINE Jac( T, Y, Jcb ) = Jacobian of the ODE function,
!                       returns Jcb = dF/dY 
!-    ICNTRL(1:10)    = integer inputs parameters
!-    RCNTRL(1:10)    = real inputs parameters
!~~~~~~~~~~~~~~~~~~~~~~~~~~~~~~~~~~~~~~~~~~~~~~~~~~~~~~~~~~~~~~~~~~~~~~
!
!~~~>     OUTPUT ARGUMENTS:  
!     
!-    Y(NVAR)    -> vector of final states (at T->Tend)
!-    Lambda(NVAR,NADJ) -> vector of final sensitivities (at T=Tend)
!-    ICNTRL(11:20)   -> integer output parameters
!-    RCNTRL(11:20)   -> real output parameters
!-    IERR       -> job status upon return
!       - succes (positive value) or failure (negative value) -
!           =  1 : Success
!           = -1 : Improper value for maximal no of steps
!           = -2 : Selected RosenbrockADJ method not implemented
!           = -3 : Hmin/Hmax/Hstart must be positive
!           = -4 : FacMin/FacMax/FacRej must be positive
!           = -5 : Improper tolerance values
!           = -6 : No of steps exceeds maximum bound
!           = -7 : Step size too small
!           = -8 : Matrix is repeatedly singular
!~~~~~~~~~~~~~~~~~~~~~~~~~~~~~~~~~~~~~~~~~~~~~~~~~~~~~~~~~~~~~~~~~~~~~~
! 
!~~~>     INPUT PARAMETERS:
!
!    Note: For input parameters equal to zero the default values of the
!       corresponding variables are used.
!
!    ICNTRL(1)   = 1: F = F(y)   Independent of T (AUTONOMOUS)
!              = 0: F = F(t,y) Depends on T (NON-AUTONOMOUS)
!
!    ICNTRL(2)   = 0: AbsTol, RelTol are NVAR-dimensional vectors
!              = 1:  AbsTol, RelTol are scalars
!
!    ICNTRL(3)  -> selection of a particular Rosenbrock method
!        = 0 :  default method is Rodas3
!        = 1 :  method is  Ros2
!        = 2 :  method is  Ros3 
!        = 3 :  method is  Ros4 
!        = 4 :  method is  Rodas3
!        = 5:   method is  Rodas4
!
!    ICNTRL(4)  -> maximum number of integration steps
!        For ICNTRL(4)=0) the default value of BUFSIZE is used
!
!    ICNTRL(6)  -> selection of a particular Rosenbrock method for the
!                continuous adjoint integration - for cts adjoint it
!                can be different than the forward method ICNTRL(3)
!         Note 1: to avoid interpolation errors (which can be huge!) 
!                   it is recommended to use only ICNTRL(7) = 2 or 4
!         Note 2: the performance of the full continuous adjoint
!                   strongly depends on the forward solution accuracy Abs/RelTol
!
!    ICNTRL(7) -> Type of adjoint algorithm
!         = 0 : default is discrete adjoint ( of method ICNTRL(3) )
!         = 1 : no adjoint       
!         = 2 : discrete adjoint ( of method ICNTRL(3) )
!         = 3 : fully adaptive continuous adjoint ( with method ICNTRL(6) )
!         = 4 : simplified continuous adjoint ( with method ICNTRL(6) )
!
!    ICNTRL(8)  -> checkpointing the LU factorization at each step:
!        ICNTRL(8)=0 : do *not* save LU factorization (the default)
!        ICNTRL(8)=1 : save LU factorization
!        Note: if ICNTRL(7)=1 the LU factorization is *not* saved
!
!~~~>  Real input parameters:
!
!    RCNTRL(1)  -> Hmin, lower bound for the integration step size
!          It is strongly recommended to keep Hmin = ZERO 
!
!    RCNTRL(2)  -> Hmax, upper bound for the integration step size
!
!    RCNTRL(3)  -> Hstart, starting value for the integration step size
!          
!    RCNTRL(4)  -> FacMin, lower bound on step decrease factor (default=0.2)
!
!    RCNTRL(5)  -> FacMax, upper bound on step increase factor (default=6)
!
!    RCNTRL(6)  -> FacRej, step decrease factor after multiple rejections
!            (default=0.1)
!
!    RCNTRL(7)  -> FacSafe, by which the new step is slightly smaller 
!         than the predicted value  (default=0.9)
!
!    RCNTRL(8)  -> ThetaMin. If Newton convergence rate smaller
!                  than ThetaMin the Jacobian is not recomputed;
!                  (default=0.001)
!
!~~~~~~~~~~~~~~~~~~~~~~~~~~~~~~~~~~~~~~~~~~~~~~~~~~~~~~~~~~~~~~~~~~~~~~
! 
!~~~>     OUTPUT PARAMETERS:
!
!    Note: each call to RosenbrockADJ adds the corrent no. of fcn calls
!      to previous value of ISTATUS(1), and similar for the other params.
!      Set ISTATUS(1:10) = 0 before call to avoid this accumulation.
!
!    ISTATUS(1) = No. of function calls
!    ISTATUS(2) = No. of jacobian calls
!    ISTATUS(3) = No. of steps
!    ISTATUS(4) = No. of accepted steps
!    ISTATUS(5) = No. of rejected steps (except at the beginning)
!    ISTATUS(6) = No. of LU decompositions
!    ISTATUS(7) = No. of forward/backward substitutions
!    ISTATUS(8) = No. of singular matrix decompositions
!
!    RSTATUS(1)  -> Texit, the time corresponding to the 
!                   computed Y upon return
!    RSTATUS(2)  -> Hexit, last accepted step before exit
!    For multiple restarts, use Hexit as Hstart in the following run 
!~~~~~~~~~~~~~~~~~~~~~~~~~~~~~~~~~~~~~~~~~~~~~~~~~~~~~~~~~~~~~~~~~~~~~~

  IMPLICIT NONE
   
!~~~>  Arguments   
   KPP_REAL, INTENT(INOUT) :: Y(NVAR)
   INTEGER, INTENT(IN)          :: NADJ
   KPP_REAL, INTENT(INOUT) :: Lambda(NVAR,NADJ)
   KPP_REAL, INTENT(IN)    :: Tstart,Tend
   KPP_REAL, INTENT(IN)    :: AbsTol(NVAR),RelTol(NVAR)
   KPP_REAL, INTENT(IN)    :: AbsTol_adj(NVAR,NADJ), RelTol_adj(NVAR,NADJ)
   INTEGER, INTENT(IN)          :: ICNTRL(20)
   KPP_REAL, INTENT(IN)    :: RCNTRL(20)
   INTEGER, INTENT(INOUT)       :: ISTATUS(20)
   KPP_REAL, INTENT(INOUT) :: RSTATUS(20)
   INTEGER, INTENT(OUT)         :: IERR
!~~~>  Parameters of the Rosenbrock method, up to 6 stages
   INTEGER ::  ros_S, rosMethod
   INTEGER, PARAMETER :: RS2=1, RS3=2, RS4=3, RD3=4, RD4=5
   KPP_REAL :: ros_A(15), ros_C(15), ros_M(6), ros_E(6), &
                    ros_Alpha(6), ros_Gamma(6), ros_ELO
   LOGICAL :: ros_NewF(6)
   CHARACTER(LEN=12) :: ros_Name
!~~~>  Types of Adjoints Implemented
   INTEGER, PARAMETER :: Adj_none = 1, Adj_discrete = 2,      &
                   Adj_continuous = 3, Adj_simple_continuous = 4
!~~~>  Checkpoints in memory
   INTEGER, PARAMETER :: bufsize = 200000
   INTEGER :: stack_ptr = 0 ! last written entry
   KPP_REAL, DIMENSION(:),   POINTER :: chk_H, chk_T
   KPP_REAL, DIMENSION(:,:), POINTER :: chk_Y, chk_K, chk_J
   KPP_REAL, DIMENSION(:,:), POINTER :: chk_dY, chk_d2Y
!~~~>  Local variables     
   KPP_REAL :: Roundoff, FacMin, FacMax, FacRej, FacSafe
   KPP_REAL :: Hmin, Hmax, Hstart
   KPP_REAL :: Texit
   INTEGER :: i, UplimTol, Max_no_steps
   INTEGER :: AdjointType, CadjMethod 
   LOGICAL :: Autonomous, VectorTol, SaveLU
!~~~>   Parameters
   KPP_REAL, PARAMETER :: ZERO = 0.0d0, ONE  = 1.0d0
   KPP_REAL, PARAMETER :: DeltaMin = 1.0d-5

!~~~>  Initialize statistics
   ISTATUS(1:20) = 0
   RSTATUS(1:20) = ZERO
   
!~~~>  Autonomous or time dependent ODE. Default is time dependent.
   Autonomous = .NOT.(ICNTRL(1) == 0)

!~~~>  For Scalar tolerances (ICNTRL(2).NE.0)  the code uses AbsTol(1) and RelTol(1)
!   For Vector tolerances (ICNTRL(2) == 0) the code uses AbsTol(1:NVAR) and RelTol(1:NVAR)
   IF (ICNTRL(2) == 0) THEN
      VectorTol = .TRUE.
      UplimTol  = NVAR
   ELSE 
      VectorTol = .FALSE.
      UplimTol  = 1
   END IF

!~~~>   Initialize the particular Rosenbrock method selected
   SELECT CASE (ICNTRL(3))
     CASE (1)
       CALL Ros2
     CASE (2)
       CALL Ros3
     CASE (3)
       CALL Ros4
     CASE (0,4)
       CALL Rodas3
     CASE (5)
       CALL Rodas4
     CASE DEFAULT
       PRINT * , 'Unknown Rosenbrock method: ICNTRL(3)=',ICNTRL(3) 
       CALL ros_ErrorMsg(-2,Tstart,ZERO,IERR)
       RETURN
   END SELECT
   
!~~~>   The maximum number of steps admitted
   IF (ICNTRL(4) == 0) THEN
      Max_no_steps = bufsize - 1
   ELSEIF (Max_no_steps > 0) THEN
      Max_no_steps=ICNTRL(4)
   ELSE 
      PRINT * ,'User-selected max no. of steps: ICNTRL(4)=',ICNTRL(4)
      CALL ros_ErrorMsg(-1,Tstart,ZERO,IERR)
      RETURN      
   END IF

!~~~>  The particular Rosenbrock method chosen for integrating the cts adjoint
   IF (ICNTRL(6) == 0) THEN
      CadjMethod = 4
   ELSEIF ( (ICNTRL(6) >= 1).AND.(ICNTRL(6) <= 5) ) THEN
      CadjMethod = ICNTRL(6)
   ELSE  
      PRINT * , 'Unknown CADJ Rosenbrock method: ICNTRL(6)=', CadjMethod
      CALL ros_ErrorMsg(-2,Tstart,ZERO,IERR)
      RETURN      
   END IF
 
!~~~>  Discrete or continuous adjoint formulation
   IF ( ICNTRL(7) == 0 ) THEN
       AdjointType = Adj_discrete
   ELSEIF ( (ICNTRL(7) >= 1).AND.(ICNTRL(7) <= 4) ) THEN
       AdjointType = ICNTRL(7)
   ELSE  
      PRINT * , 'User-selected adjoint type: ICNTRL(7)=', AdjointType
      CALL ros_ErrorMsg(-9,Tstart,ZERO,IERR)
      RETURN      
   END IF

!~~~> Save or not the forward LU factorization
      SaveLU = (ICNTRL(8) /= 0) 

 
!~~~>  Unit roundoff (1+Roundoff>1)  
   Roundoff = WLAMCH('E')

!~~~>  Lower bound on the step size: (positive value)
   IF (RCNTRL(1) == ZERO) THEN
      Hmin = ZERO
   ELSEIF (RCNTRL(1) > ZERO) THEN 
      Hmin = RCNTRL(1)
   ELSE  
      PRINT * , 'User-selected Hmin: RCNTRL(1)=', RCNTRL(1)
      CALL ros_ErrorMsg(-3,Tstart,ZERO,IERR)
      RETURN      
   END IF
!~~~>  Upper bound on the step size: (positive value)
   IF (RCNTRL(2) == ZERO) THEN
      Hmax = ABS(Tend-Tstart)
   ELSEIF (RCNTRL(2) > ZERO) THEN
      Hmax = MIN(ABS(RCNTRL(2)),ABS(Tend-Tstart))
   ELSE  
      PRINT * , 'User-selected Hmax: RCNTRL(2)=', RCNTRL(2)
      CALL ros_ErrorMsg(-3,Tstart,ZERO,IERR)
      RETURN      
   END IF
!~~~>  Starting step size: (positive value)
   IF (RCNTRL(3) == ZERO) THEN
      Hstart = MAX(Hmin,DeltaMin)
   ELSEIF (RCNTRL(3) > ZERO) THEN
      Hstart = MIN(ABS(RCNTRL(3)),ABS(Tend-Tstart))
   ELSE  
      PRINT * , 'User-selected Hstart: RCNTRL(3)=', RCNTRL(3)
      CALL ros_ErrorMsg(-3,Tstart,ZERO,IERR)
      RETURN      
   END IF
!~~~>  Step size can be changed s.t.  FacMin < Hnew/Hold < FacMax 
   IF (RCNTRL(4) == ZERO) THEN
      FacMin = 0.2d0
   ELSEIF (RCNTRL(4) > ZERO) THEN
      FacMin = RCNTRL(4)
   ELSE  
      PRINT * , 'User-selected FacMin: RCNTRL(4)=', RCNTRL(4)
      CALL ros_ErrorMsg(-4,Tstart,ZERO,IERR)
      RETURN      
   END IF
   IF (RCNTRL(5) == ZERO) THEN
      FacMax = 6.0d0
   ELSEIF (RCNTRL(5) > ZERO) THEN
      FacMax = RCNTRL(5)
   ELSE  
      PRINT * , 'User-selected FacMax: RCNTRL(5)=', RCNTRL(5)
      CALL ros_ErrorMsg(-4,Tstart,ZERO,IERR)
      RETURN      
   END IF
!~~~>   FacRej: Factor to decrease step after 2 succesive rejections
   IF (RCNTRL(6) == ZERO) THEN
      FacRej = 0.1d0
   ELSEIF (RCNTRL(6) > ZERO) THEN
      FacRej = RCNTRL(6)
   ELSE  
      PRINT * , 'User-selected FacRej: RCNTRL(6)=', RCNTRL(6)
      CALL ros_ErrorMsg(-4,Tstart,ZERO,IERR)
      RETURN      
   END IF
!~~~>   FacSafe: Safety Factor in the computation of new step size
   IF (RCNTRL(7) == ZERO) THEN
      FacSafe = 0.9d0
   ELSEIF (RCNTRL(7) > ZERO) THEN
      FacSafe = RCNTRL(7)
   ELSE  
      PRINT * , 'User-selected FacSafe: RCNTRL(7)=', RCNTRL(7)
      CALL ros_ErrorMsg(-4,Tstart,ZERO,IERR)
      RETURN      
   END IF
!~~~>  Check if tolerances are reasonable
    DO i=1,UplimTol
      IF ( (AbsTol(i) <= ZERO) .OR. (RelTol(i) <= 10.d0*Roundoff) &
         .OR. (RelTol(i) >= 1.0d0) ) THEN
        PRINT * , ' AbsTol(',i,') = ',AbsTol(i)
        PRINT * , ' RelTol(',i,') = ',RelTol(i)
        CALL ros_ErrorMsg(-5,Tstart,ZERO,IERR)
        RETURN
      END IF
    END DO
     
 
!~~~>  Allocate checkpoint space or open checkpoint files
   IF (AdjointType == Adj_discrete) THEN
       CALL ros_AllocateDBuffers( ros_S )
   ELSEIF ( (AdjointType == Adj_continuous).OR.  &
           (AdjointType == Adj_simple_continuous) ) THEN
       CALL ros_AllocateCBuffers
   END IF
   
!~~~>  CALL Forward Rosenbrock method   
   CALL ros_FwdInt(Y,Tstart,Tend,Texit,          & 
        AbsTol, RelTol,                          & 
!  Error indicator
        IERR)

   PRINT*,'FORWARD STATISTICS'
   PRINT*,'Step=',Nstp,' Acc=',Nacc,   &
        ' Rej=',Nrej, ' Singular=',Nsng

!~~~>  If Forward integration failed return   
   IF (IERR<0) RETURN

!~~~>   Initialize the particular Rosenbrock method for continuous adjoint
   IF ( (AdjointType == Adj_continuous).OR. &
           (AdjointType == Adj_simple_continuous) ) THEN
   SELECT CASE (CadjMethod)
     CASE (1)
       CALL Ros2
     CASE (2)
       CALL Ros3
     CASE (3)
       CALL Ros4
     CASE (4)
       CALL Rodas3
     CASE (5)
       CALL Rodas4
     CASE DEFAULT
       PRINT * , 'Unknown Rosenbrock method: ICNTRL(3)=', ICNTRL(3)
       CALL ros_ErrorMsg(-2,Tstart,ZERO,IERR) 
       RETURN     
   END SELECT
   END IF

   SELECT CASE (AdjointType)   
   CASE (Adj_discrete)   
     CALL ros_DadjInt (                          &
        NADJ, Lambda,                            &
        Tstart, Tend, Texit,                     &
        IERR )
   CASE (Adj_continuous) 
     CALL ros_CadjInt (                          &
        NADJ, Lambda,                            &
        Tend, Tstart, Texit,                     &
        AbsTol_adj, RelTol_adj,                  &
        IERR )
   CASE (Adj_simple_continuous)
     CALL ros_SimpleCadjInt (                    &
        NADJ, Lambda,                            &
        Tstart, Tend, Texit,                     &
        IERR )
   END SELECT ! AdjointType

   PRINT*,'ADJOINT STATISTICS'
   PRINT*,'Step=',Nstp,' Acc=',Nacc,             &
        ' Rej=',Nrej, ' Singular=',Nsng

!~~~>  Free checkpoint space or close checkpoint files
   IF (AdjointType == Adj_discrete) THEN
      CALL ros_FreeDBuffers
   ELSEIF ( (AdjointType == Adj_continuous) .OR. &
           (AdjointType == Adj_simple_continuous) ) THEN
      CALL ros_FreeCBuffers
   END IF
   

!~~~~~~~~~~~~~~~~~~~~~~~~~~~~~~~~~~~~~~~~~~~~~~~~~~~~~~~~~~~~~~~~~~~~~~~~~~~~
CONTAINS !  Procedures internal to RosenbrockADJ
!~~~~~~~~~~~~~~~~~~~~~~~~~~~~~~~~~~~~~~~~~~~~~~~~~~~~~~~~~~~~~~~~~~~~~~~~~~~~


!~~~~~~~~~~~~~~~~~~~~~~~~~~~~~~~~~~~~~~~~~~~~~~~~~~~~~~~~~~~~~~~~~~~~~~~~~~~~
  SUBROUTINE ros_AllocateDBuffers( S )
!~~~>  Allocate buffer space for discrete adjoint
!~~~~~~~~~~~~~~~~~~~~~~~~~~~~~~~~~~~~~~~~~~~~~~~~~~~~~~~~~~~~~~~~~~~~~~~~~~~~
   INTEGER :: i, S
   
   ALLOCATE( chk_H(bufsize), STAT=i )
   IF (i/=0) THEN
      PRINT*,'Failed allocation of buffer H'; STOP
   END IF   
   ALLOCATE( chk_T(bufsize), STAT=i )
   IF (i/=0) THEN
      PRINT*,'Failed allocation of buffer T'; STOP
   END IF   
   ALLOCATE( chk_Y(NVAR*S,bufsize), STAT=i )
   IF (i/=0) THEN
      PRINT*,'Failed allocation of buffer Y'; STOP
   END IF   
   ALLOCATE( chk_K(NVAR*S,bufsize), STAT=i )
   IF (i/=0) THEN
      PRINT*,'Failed allocation of buffer K'; STOP
   END IF  
   IF (SaveLU) THEN 
#ifdef FULL_ALGEBRA
     ALLOCATE( chk_J(NVAR*NVAR,bufsize), STAT=i )
#else
     ALLOCATE( chk_J(LU_NONZERO,bufsize), STAT=i )
#endif
     IF (i/=0) THEN
        PRINT*,'Failed allocation of buffer J'; STOP
     END IF   
   END IF   

 END SUBROUTINE ros_AllocateDBuffers


!~~~~~~~~~~~~~~~~~~~~~~~~~~~~~~~~~~~~~~~~~~~~~~~~~~~~~~~~~~~~~~~~~~~~~~~~~~~~
 SUBROUTINE ros_FreeDBuffers
!~~~>  Dallocate buffer space for discrete adjoint
!~~~~~~~~~~~~~~~~~~~~~~~~~~~~~~~~~~~~~~~~~~~~~~~~~~~~~~~~~~~~~~~~~~~~~~~~~~~~
   INTEGER :: i
   
   DEALLOCATE( chk_H, STAT=i )
   IF (i/=0) THEN
      PRINT*,'Failed deallocation of buffer H'; STOP
   END IF   
   DEALLOCATE( chk_T, STAT=i )
   IF (i/=0) THEN
      PRINT*,'Failed deallocation of buffer T'; STOP
   END IF   
   DEALLOCATE( chk_Y, STAT=i )
   IF (i/=0) THEN
      PRINT*,'Failed deallocation of buffer Y'; STOP
   END IF   
   DEALLOCATE( chk_K, STAT=i )
   IF (i/=0) THEN
      PRINT*,'Failed deallocation of buffer K'; STOP
   END IF   
   IF (SaveLU) THEN 
     DEALLOCATE( chk_J, STAT=i )
     IF (i/=0) THEN
        PRINT*,'Failed deallocation of buffer J'; STOP
     END IF   
   END IF   
 
 END SUBROUTINE ros_FreeDBuffers


!~~~~~~~~~~~~~~~~~~~~~~~~~~~~~~~~~~~~~~~~~~~~~~~~~~~~~~~~~~~~~~~~~~~~~~~~~~~~
 SUBROUTINE ros_AllocateCBuffers
!~~~>  Allocate buffer space for continuous adjoint
!~~~~~~~~~~~~~~~~~~~~~~~~~~~~~~~~~~~~~~~~~~~~~~~~~~~~~~~~~~~~~~~~~~~~~~~~~~~~
   INTEGER :: i
   
   ALLOCATE( chk_H(bufsize), STAT=i )
   IF (i/=0) THEN
      PRINT*,'Failed allocation of buffer H'; STOP
   END IF   
   ALLOCATE( chk_T(bufsize), STAT=i )
   IF (i/=0) THEN
      PRINT*,'Failed allocation of buffer T'; STOP
   END IF   
   ALLOCATE( chk_Y(NVAR,bufsize), STAT=i )
   IF (i/=0) THEN
      PRINT*,'Failed allocation of buffer Y'; STOP
   END IF   
   ALLOCATE( chk_dY(NVAR,bufsize), STAT=i )
   IF (i/=0) THEN
      PRINT*,'Failed allocation of buffer dY'; STOP
   END IF   
   ALLOCATE( chk_d2Y(NVAR,bufsize), STAT=i )
   IF (i/=0) THEN
      PRINT*,'Failed allocation of buffer d2Y'; STOP
   END IF   
 
 END SUBROUTINE ros_AllocateCBuffers


!~~~~~~~~~~~~~~~~~~~~~~~~~~~~~~~~~~~~~~~~~~~~~~~~~~~~~~~~~~~~~~~~~~~~~~~~~~~~
 SUBROUTINE ros_FreeCBuffers
!~~~>  Dallocate buffer space for continuous adjoint
!~~~~~~~~~~~~~~~~~~~~~~~~~~~~~~~~~~~~~~~~~~~~~~~~~~~~~~~~~~~~~~~~~~~~~~~~~~~~
   INTEGER :: i
   
   DEALLOCATE( chk_H, STAT=i )
   IF (i/=0) THEN
      PRINT*,'Failed deallocation of buffer H'; STOP
   END IF   
   DEALLOCATE( chk_T, STAT=i )
   IF (i/=0) THEN
      PRINT*,'Failed deallocation of buffer T'; STOP
   END IF   
   DEALLOCATE( chk_Y, STAT=i )
   IF (i/=0) THEN
      PRINT*,'Failed deallocation of buffer Y'; STOP
   END IF   
   DEALLOCATE( chk_dY, STAT=i )
   IF (i/=0) THEN
      PRINT*,'Failed deallocation of buffer dY'; STOP
   END IF   
   DEALLOCATE( chk_d2Y, STAT=i )
   IF (i/=0) THEN
      PRINT*,'Failed deallocation of buffer d2Y'; STOP
   END IF   
 
 END SUBROUTINE ros_FreeCBuffers

!~~~~~~~~~~~~~~~~~~~~~~~~~~~~~~~~~~~~~~~~~~~~~~~~~~~~~~~~~~~~~~~~~~~~~~~~~~~~
 SUBROUTINE ros_DPush( S, T, H, Ystage, K, E, P )
!~~~~~~~~~~~~~~~~~~~~~~~~~~~~~~~~~~~~~~~~~~~~~~~~~~~~~~~~~~~~~~~~~~~~~~~~~~~~
!~~~> Saves the next trajectory snapshot for discrete adjoints
!~~~~~~~~~~~~~~~~~~~~~~~~~~~~~~~~~~~~~~~~~~~~~~~~~~~~~~~~~~~~~~~~~~~~~~~~~~~~
   INTEGER :: S ! no of stages
   KPP_REAL :: T, H, Ystage(NVAR*S), K(NVAR*S)
   INTEGER       :: P(NVAR)
#ifdef FULL_ALGEBRA
   KPP_REAL :: E(NVAR,NVAR)
#else       
   KPP_REAL :: E(LU_NONZERO)
#endif
   
   stack_ptr = stack_ptr + 1
   IF ( stack_ptr > bufsize ) THEN
     PRINT*,'Push failed: buffer overflow'
     STOP
   END IF  
   chk_H( stack_ptr ) = H
   chk_T( stack_ptr ) = T
   !CALL WCOPY(NVAR*S,Ystage,1,chk_Y(1,stack_ptr),1)
   !CALL WCOPY(NVAR*S,K,1,chk_K(1,stack_ptr),1)
   chk_Y(1:NVAR*S,stack_ptr) = Ystage(1:NVAR*S)
   chk_K(1:NVAR*S,stack_ptr) = K(1:NVAR*S)
   IF (SaveLU) THEN 
#ifdef FULL_ALGEBRA
       chk_J(1:NVAR,1:NVAR,stack_ptr) = E(1:NVAR,1:NVAR)
       chk_P(1:NVAR,stack_ptr)        = P(1:NVAR)
#else       
       chk_J(1:LU_NONZERO,stack_ptr)  = E(1:LU_NONZERO)
#endif
    END IF
  
  END SUBROUTINE ros_DPush
  
   
!~~~~~~~~~~~~~~~~~~~~~~~~~~~~~~~~~~~~~~~~~~~~~~~~~~~~~~~~~~~~~~~~~~~~~~~~~~~~
  SUBROUTINE ros_DPop( S, T, H, Ystage, K, E, P )
!~~~~~~~~~~~~~~~~~~~~~~~~~~~~~~~~~~~~~~~~~~~~~~~~~~~~~~~~~~~~~~~~~~~~~~~~~~~~
!~~~> Retrieves the next trajectory snapshot for discrete adjoints
!~~~~~~~~~~~~~~~~~~~~~~~~~~~~~~~~~~~~~~~~~~~~~~~~~~~~~~~~~~~~~~~~~~~~~~~~~~~~

   INTEGER :: S ! no of stages
   KPP_REAL :: T, H, Ystage(NVAR*S), K(NVAR*S)
   INTEGER       :: P(NVAR)
#ifdef FULL_ALGEBRA
   KPP_REAL :: E(NVAR,NVAR)
#else       
   KPP_REAL :: E(LU_NONZERO)
#endif
   
   IF ( stack_ptr <= 0 ) THEN
     PRINT*,'Pop failed: empty buffer'
     STOP
   END IF  
   H = chk_H( stack_ptr )
   T = chk_T( stack_ptr )
   !CALL WCOPY(NVAR*S,chk_Y(1,stack_ptr),1,Ystage,1)
   !CALL WCOPY(NVAR*S,chk_K(1,stack_ptr),1,K,1)
   Ystage(1:NVAR*S) = chk_Y(1:NVAR*S,stack_ptr)
   K(1:NVAR*S)      = chk_K(1:NVAR*S,stack_ptr)
   !CALL WCOPY(LU_NONZERO,chk_J(1,stack_ptr),1,Jcb,1)
   IF (SaveLU) THEN
#ifdef FULL_ALGEBRA
       E(1:NVAR,1:NVAR) = chk_J(1:NVAR,1:NVAR,stack_ptr)
       P(1:NVAR)        = chk_P(1:NVAR,stack_ptr)
#else       
       E(1:LU_NONZERO)  = chk_J(1:LU_NONZERO,stack_ptr)
#endif
    END IF

   stack_ptr = stack_ptr - 1
  
  END SUBROUTINE ros_DPop
 
!~~~~~~~~~~~~~~~~~~~~~~~~~~~~~~~~~~~~~~~~~~~~~~~~~~~~~~~~~~~~~~~~~~~~~~~~~~~~
  SUBROUTINE ros_CPush( T, H, Y, dY, d2Y )
!~~~~~~~~~~~~~~~~~~~~~~~~~~~~~~~~~~~~~~~~~~~~~~~~~~~~~~~~~~~~~~~~~~~~~~~~~~~~
!~~~> Saves the next trajectory snapshot for discrete adjoints
!~~~~~~~~~~~~~~~~~~~~~~~~~~~~~~~~~~~~~~~~~~~~~~~~~~~~~~~~~~~~~~~~~~~~~~~~~~~~

   KPP_REAL :: T, H, Y(NVAR), dY(NVAR), d2Y(NVAR)
   
   stack_ptr = stack_ptr + 1
   IF ( stack_ptr > bufsize ) THEN
     PRINT*,'Push failed: buffer overflow'
     STOP
   END IF  
   chk_H( stack_ptr ) = H
   chk_T( stack_ptr ) = T
   !CALL WCOPY(NVAR,Y,1,chk_Y(1,stack_ptr),1)
   !CALL WCOPY(NVAR,dY,1,chk_dY(1,stack_ptr),1)
   !CALL WCOPY(NVAR,d2Y,1,chk_d2Y(1,stack_ptr),1)
   chk_Y(1:NVAR,stack_ptr)   = Y(1:NVAR)
   chk_dY(1:NVAR,stack_ptr)  = dY(1:NVAR)
   chk_d2Y(1:NVAR,stack_ptr) = d2Y(1:NVAR)
  END SUBROUTINE ros_CPush
  
   
!~~~~~~~~~~~~~~~~~~~~~~~~~~~~~~~~~~~~~~~~~~~~~~~~~~~~~~~~~~~~~~~~~~~~~~~~~~~~
  SUBROUTINE ros_CPop( T, H, Y, dY, d2Y )
!~~~~~~~~~~~~~~~~~~~~~~~~~~~~~~~~~~~~~~~~~~~~~~~~~~~~~~~~~~~~~~~~~~~~~~~~~~~~
!~~~> Retrieves the next trajectory snapshot for discrete adjoints
!~~~~~~~~~~~~~~~~~~~~~~~~~~~~~~~~~~~~~~~~~~~~~~~~~~~~~~~~~~~~~~~~~~~~~~~~~~~~

   KPP_REAL :: T, H, Y(NVAR), dY(NVAR), d2Y(NVAR)
   
   IF ( stack_ptr <= 0 ) THEN
     PRINT*,'Pop failed: empty buffer'
     STOP
   END IF  
   H = chk_H( stack_ptr )
   T = chk_T( stack_ptr )
   !CALL WCOPY(NVAR,chk_Y(1,stack_ptr),1,Y,1)
   !CALL WCOPY(NVAR,chk_dY(1,stack_ptr),1,dY,1)
   !CALL WCOPY(NVAR,chk_d2Y(1,stack_ptr),1,d2Y,1)
   Y(1:NVAR)   = chk_Y(1:NVAR,stack_ptr)
   dY(1:NVAR)  = chk_dY(1:NVAR,stack_ptr)
   d2Y(1:NVAR) = chk_d2Y(1:NVAR,stack_ptr)

   stack_ptr = stack_ptr - 1
  
  END SUBROUTINE ros_CPop


!~~~~~~~~~~~~~~~~~~~~~~~~~~~~~~~~~~~~~~~~~~~~~~~~~~~~~~~~~~~~~~~~~~~~~~~~~~~~   
 SUBROUTINE ros_ErrorMsg(Code,T,H,IERR)
!~~~~~~~~~~~~~~~~~~~~~~~~~~~~~~~~~~~~~~~~~~~~~~~~~~~~~~~~~~~~~~~~~~~~~~~~~~~~   
!    Handles all error messages
!~~~~~~~~~~~~~~~~~~~~~~~~~~~~~~~~~~~~~~~~~~~~~~~~~~~~~~~~~~~~~~~~~~~~~~~~~~~~   
  
   KPP_REAL, INTENT(IN) :: T, H
   INTEGER, INTENT(IN)  :: Code
   INTEGER, INTENT(OUT) :: IERR
   
   IERR = Code
   PRINT * , &
     'Forced exit from RosenbrockADJ due to the following error:' 
     
   SELECT CASE (Code)
    CASE (-1)    
      PRINT * , '--> Improper value for maximal no of steps'
    CASE (-2)    
      PRINT * , '--> Selected RosenbrockADJ method not implemented'
    CASE (-3)    
      PRINT * , '--> Hmin/Hmax/Hstart must be positive'
    CASE (-4)    
      PRINT * , '--> FacMin/FacMax/FacRej must be positive'
    CASE (-5) 
      PRINT * , '--> Improper tolerance values'
    CASE (-6) 
      PRINT * , '--> No of steps exceeds maximum buffer bound'
    CASE (-7) 
      PRINT * , '--> Step size too small: T + 10*H = T', &
            ' or H < Roundoff'
    CASE (-8)    
      PRINT * , '--> Matrix is repeatedly singular'
    CASE (-9)    
      PRINT * , '--> Improper type of adjoint selected'
    CASE DEFAULT
      PRINT *, 'Unknown Error code: ', Code
   END SELECT
   
   PRINT *, "T=", T, "and H=", H
     
 END SUBROUTINE ros_ErrorMsg
   
     
   
!~~~~~~~~~~~~~~~~~~~~~~~~~~~~~~~~~~~~~~~~~~~~~~~~~~~~~~~~~~~~~~~~~~~~~~~~~~~~
 SUBROUTINE ros_FwdInt (Y,                       &
        Tstart, Tend, T,                         &
        AbsTol, RelTol,                          &
!~~~> Error indicator
        IERR )
!~~~~~~~~~~~~~~~~~~~~~~~~~~~~~~~~~~~~~~~~~~~~~~~~~~~~~~~~~~~~~~~~~~~~~~~~~~~~
!   Template for the implementation of a generic RosenbrockADJ method 
!      defined by ros_S (no of stages)  
!      and its coefficients ros_{A,C,M,E,Alpha,Gamma}
!~~~~~~~~~~~~~~~~~~~~~~~~~~~~~~~~~~~~~~~~~~~~~~~~~~~~~~~~~~~~~~~~~~~~~~~~~~~~

  IMPLICIT NONE
   
!~~~> Input: the initial condition at Tstart; Output: the solution at T   
   KPP_REAL, INTENT(INOUT) :: Y(NVAR)
!~~~> Input: integration interval   
   KPP_REAL, INTENT(IN) :: Tstart,Tend      
!~~~> Output: time at which the solution is returned (T=Tend if success)   
   KPP_REAL, INTENT(OUT) ::  T      
!~~~> Input: tolerances      
   KPP_REAL, INTENT(IN) ::  AbsTol(NVAR), RelTol(NVAR)
!~~~> Output: Error indicator
   INTEGER, INTENT(OUT) :: IERR
! ~~~~ Local variables        
   KPP_REAL :: Ynew(NVAR), Fcn0(NVAR), Fcn(NVAR) 
   KPP_REAL :: K(NVAR*ros_S), dFdT(NVAR)
   KPP_REAL, DIMENSION(:), POINTER :: Ystage
#ifdef FULL_ALGEBRA    
   KPP_REAL :: Jac0(NVAR,NVAR),  Ghimj(NVAR,NVAR)
#else
   KPP_REAL :: Jac0(LU_NONZERO), Ghimj(LU_NONZERO)
#endif
   KPP_REAL :: H, Hnew, HC, HG, Fac, Tau 
   KPP_REAL :: Err, Yerr(NVAR)
   INTEGER :: Pivot(NVAR), Direction, ioffset, i, j, istage
   LOGICAL :: RejectLastH, RejectMoreH, Singular
!~~~~~~~~~~~~~~~~~~~~~~~~~~~~~~~~~~~~~~~~~~~~~~~~~~~~~~~~~~~~~~~~~~~~~~~~~~~~

!~~~>  Allocate stage vector buffer if needed
   IF (AdjointType == Adj_discrete) THEN
        ALLOCATE(Ystage(NVAR*ros_S), STAT=i)
        ! Uninitialized Ystage may lead to NaN on some compilers
        Ystage = 0.0d0
        IF (i/=0) THEN
          PRINT*,'Allocation of Ystage failed'
          STOP
        END IF
   END IF   
   
!~~~>  Initial preparations
   T = Tstart
   RSTATUS(Nhexit) = ZERO
   H = MIN( MAX(ABS(Hmin),ABS(Hstart)) , ABS(Hmax) )
   IF (ABS(H) <= 10.0_dp*Roundoff) H = DeltaMin

   IF (Tend  >=  Tstart) THEN
     Direction = +1
   ELSE
     Direction = -1
   END IF
   H = Direction*H

   RejectLastH=.FALSE.
   RejectMoreH=.FALSE.
   
!~~~> Time loop begins below 

TimeLoop: DO WHILE ( (Direction > 0).AND.((T-Tend)+Roundoff <= ZERO) &
       .OR. (Direction < 0).AND.((Tend-T)+Roundoff <= ZERO) ) 
      
   IF ( ISTATUS(Nstp) > Max_no_steps ) THEN  ! Too many steps
      CALL ros_ErrorMsg(-6,T,H,IERR)
      RETURN
   END IF
   IF ( ((T+0.1d0*H) == T).OR.(H <= Roundoff) ) THEN  ! Step size too small
      CALL ros_ErrorMsg(-7,T,H,IERR)
      RETURN
   END IF
   
!~~~>  Limit H if necessary to avoid going beyond Tend   
   RSTATUS(Nhexit) = H
   H = MIN(H,ABS(Tend-T))

!~~~>   Compute the function at current time
   CALL FunTemplate(T,Y,Fcn0)
   ISTATUS(Nfun) = ISTATUS(Nfun) + 1 

!~~~>  Compute the function derivative with respect to T
   IF (.NOT.Autonomous) THEN
      CALL ros_FunTimeDerivative ( T, Roundoff, Y, &
                Fcn0, dFdT )
   END IF
  
!~~~>   Compute the Jacobian at current time
   CALL JacTemplate(T,Y,Jac0)
   ISTATUS(Njac) = ISTATUS(Njac) + 1
 
!~~~>  Repeat step calculation until current step accepted
UntilAccepted: DO  
   
   CALL ros_PrepareMatrix(H,Direction,ros_Gamma(1), &
          Jac0,Ghimj,Pivot,Singular)
   IF (Singular) THEN ! More than 5 consecutive failed decompositions
       CALL ros_ErrorMsg(-8,T,H,IERR)
       RETURN
   END IF

!~~~>   Compute the stages
Stage: DO istage = 1, ros_S
      
      ! Current istage offset. Current istage vector is K(ioffset+1:ioffset+NVAR)
       ioffset = NVAR*(istage-1)
      
      ! For the 1st istage the function has been computed previously
       IF ( istage == 1 ) THEN
         CALL WCOPY(NVAR,Fcn0,1,Fcn,1)
         IF (AdjointType == Adj_discrete) THEN ! Save stage solution
            ! CALL WCOPY(NVAR,Y,1,Ystage(1),1)
            Ystage(1:NVAR) = Y(1:NVAR)
            CALL WCOPY(NVAR,Y,1,Ynew,1)
         END IF   
      ! istage>1 and a new function evaluation is needed at the current istage
       ELSEIF ( ros_NewF(istage) ) THEN
         CALL WCOPY(NVAR,Y,1,Ynew,1)
         DO j = 1, istage-1
           CALL WAXPY(NVAR,ros_A((istage-1)*(istage-2)/2+j), &
            K(NVAR*(j-1)+1),1,Ynew,1) 
         END DO
         Tau = T + ros_Alpha(istage)*Direction*H
         CALL FunTemplate(Tau,Ynew,Fcn)
         ISTATUS(Nfun) = ISTATUS(Nfun) + 1
       END IF ! if istage == 1 elseif ros_NewF(istage)
      ! save stage solution every time even if ynew is not updated
       IF ( ( istage > 1 ).AND.(AdjointType == Adj_discrete) ) THEN
         ! CALL WCOPY(NVAR,Ynew,1,Ystage(ioffset+1),1)
         Ystage(ioffset+1:ioffset+NVAR) = Ynew(1:NVAR)
       END IF   
       CALL WCOPY(NVAR,Fcn,1,K(ioffset+1),1)
       DO j = 1, istage-1
         HC = ros_C((istage-1)*(istage-2)/2+j)/(Direction*H)
         CALL WAXPY(NVAR,HC,K(NVAR*(j-1)+1),1,K(ioffset+1),1)
       END DO
       IF ((.NOT. Autonomous).AND.(ros_Gamma(istage).NE.ZERO)) THEN
         HG = Direction*H*ros_Gamma(istage)
         CALL WAXPY(NVAR,HG,dFdT,1,K(ioffset+1),1)
       END IF
       CALL ros_Solve('N', Ghimj, Pivot, K(ioffset+1))
      
   END DO Stage     
            

!~~~>  Compute the new solution 
   CALL WCOPY(NVAR,Y,1,Ynew,1)
   DO j=1,ros_S
         CALL WAXPY(NVAR,ros_M(j),K(NVAR*(j-1)+1),1,Ynew,1)
   END DO

!~~~>  Compute the error estimation 
   CALL WSCAL(NVAR,ZERO,Yerr,1)
   DO j=1,ros_S     
        CALL WAXPY(NVAR,ros_E(j),K(NVAR*(j-1)+1),1,Yerr,1)
   END DO 
   Err = ros_ErrorNorm ( Y, Ynew, Yerr, AbsTol, RelTol, VectorTol )

!~~~> New step size is bounded by FacMin <= Hnew/H <= FacMax
   Fac  = MIN(FacMax,MAX(FacMin,FacSafe/Err**(ONE/ros_ELO)))
   Hnew = H*Fac  

!~~~>  Check the error magnitude and adjust step size
   ISTATUS(Nstp) = ISTATUS(Nstp) + 1
   IF ( (Err <= ONE).OR.(H <= Hmin) ) THEN  !~~~> Accept step
      ISTATUS(Nacc) = ISTATUS(Nacc) + 1
      IF (AdjointType == Adj_discrete) THEN ! Save current state
          CALL ros_DPush( ros_S, T, H, Ystage, K, Ghimj, Pivot )
      ELSEIF ( (AdjointType == Adj_continuous) .OR. &
           (AdjointType == Adj_simple_continuous) ) THEN
#ifdef FULL_ALGEBRA
          K = MATMUL(Jac0,Fcn0)
#else           
          CALL Jac_SP_Vec( Jac0, Fcn0, K(1) )
#endif          
          IF (.NOT. Autonomous) THEN
             CALL WAXPY(NVAR,ONE,dFdT,1,K(1),1)
          END IF   
          CALL ros_CPush( T, H, Y, Fcn0, K(1) )
      END IF      
      CALL WCOPY(NVAR,Ynew,1,Y,1)
      T = T + Direction*H
      Hnew = MAX(Hmin,MIN(Hnew,Hmax))
      IF (RejectLastH) THEN  ! No step size increase after a rejected step
         Hnew = MIN(Hnew,H) 
      END IF   
      RSTATUS(Nhexit) = H
      RSTATUS(Nhnew)  = Hnew
      RSTATUS(Ntexit) = T
      RejectLastH = .FALSE.  
      RejectMoreH = .FALSE.
      H = Hnew      
      EXIT UntilAccepted ! EXIT THE LOOP: WHILE STEP NOT ACCEPTED
   ELSE           !~~~> Reject step
      IF (RejectMoreH) THEN
         Hnew = H*FacRej
      END IF   
      RejectMoreH = RejectLastH
      RejectLastH = .TRUE.
      H = Hnew
      IF (ISTATUS(Nacc) >= 1) THEN
         ISTATUS(Nrej) = ISTATUS(Nrej) + 1
      END IF    
   END IF ! Err <= 1

   END DO UntilAccepted 

   END DO TimeLoop 
   
!~~~> Save last state: only needed for continuous adjoint
   IF ( (AdjointType == Adj_continuous) .OR. &
       (AdjointType == Adj_simple_continuous) ) THEN
       CALL FunTemplate(T,Y,Fcn0)
       ISTATUS(Nfun) = ISTATUS(Nfun) + 1
       CALL JacTemplate(T,Y,Jac0)
       ISTATUS(Njac) = ISTATUS(Njac) + 1
#ifdef FULL_ALGEBRA
       K = MATMUL(Jac0,Fcn0)
#else
       CALL Jac_SP_Vec( Jac0, Fcn0, K(1) )
#endif       
       IF (.NOT. Autonomous) THEN
           CALL ros_FunTimeDerivative ( T, Roundoff, Y, &
                Fcn0, dFdT )
           CALL WAXPY(NVAR,ONE,dFdT,1,K(1),1)
       END IF   
       CALL ros_CPush( T, H, Y, Fcn0, K(1) )
!~~~> Deallocate stage buffer: only needed for discrete adjoint
   ELSEIF (AdjointType == Adj_discrete) THEN 
        DEALLOCATE(Ystage, STAT=i)
        IF (i/=0) THEN
          PRINT*,'Deallocation of Ystage failed'
          STOP
        END IF
   END IF   
   
!~~~> Succesful exit
   IERR = 1  !~~~> The integration was successful

  END SUBROUTINE ros_FwdInt
   
     
!~~~~~~~~~~~~~~~~~~~~~~~~~~~~~~~~~~~~~~~~~~~~~~~~~~~~~~~~~~~~~~~~~~~~~~~~~~~~
 SUBROUTINE ros_DadjInt (                        &
        NADJ, Lambda,                            &
        Tstart, Tend, T,                         &
!~~~> Error indicator
        IERR )
!~~~~~~~~~~~~~~~~~~~~~~~~~~~~~~~~~~~~~~~~~~~~~~~~~~~~~~~~~~~~~~~~~~~~~~~~~~~~
!   Template for the implementation of a generic RosenbrockSOA method 
!      defined by ros_S (no of stages)  
!      and its coefficients ros_{A,C,M,E,Alpha,Gamma}
!~~~~~~~~~~~~~~~~~~~~~~~~~~~~~~~~~~~~~~~~~~~~~~~~~~~~~~~~~~~~~~~~~~~~~~~~~~~~

  IMPLICIT NONE
   
!~~~> Input: the initial condition at Tstart; Output: the solution at T   
   INTEGER, INTENT(IN)     :: NADJ
!~~~> First order adjoint   
   KPP_REAL, INTENT(INOUT) :: Lambda(NVAR,NADJ)
!!~~~> Input: integration interval   
   KPP_REAL, INTENT(IN) :: Tstart,Tend      
!~~~> Output: time at which the solution is returned (T=Tend if success)   
   KPP_REAL, INTENT(OUT) ::  T      
!~~~> Output: Error indicator
   INTEGER, INTENT(OUT) :: IERR
! ~~~~ Local variables        
   KPP_REAL :: Ystage(NVAR*ros_S), K(NVAR*ros_S)
   KPP_REAL :: U(NVAR*ros_S,NADJ), V(NVAR*ros_S,NADJ)
#ifdef FULL_ALGEBRA
   KPP_REAL, DIMENSION(NVAR,NVAR)  :: Jac, dJdT, Ghimj
#else
   KPP_REAL, DIMENSION(LU_NONZERO) :: Jac, dJdT, Ghimj
#endif
   KPP_REAL :: Hes0(NHESS)
   KPP_REAL :: Tmp(NVAR), Tmp2(NVAR)
   KPP_REAL :: H, HC, HA, Tau 
   INTEGER :: Pivot(NVAR), Direction
   INTEGER :: i, j, m, istage, istart, jstart
!~~~>  Local parameters
   KPP_REAL, PARAMETER :: ZERO = 0.0d0, ONE  = 1.0d0 
   KPP_REAL, PARAMETER :: DeltaMin = 1.0d-5
!~~~~~~~~~~~~~~~~~~~~~~~~~~~~~~~~~~~~~~~~~~~~~~~~~~~~~~~~~~~~~~~~~~~~~~~~~~~~

   
   
   IF (Tend  >=  Tstart) THEN
     Direction = +1
   ELSE
     Direction = -1
   END IF               

!~~~> Time loop begins below 
TimeLoop: DO WHILE ( stack_ptr > 0 )
        
   !~~~>  Recover checkpoints for stage values and vectors
   CALL ros_DPop( ros_S, T, H, Ystage, K, Ghimj, Pivot )

!   ISTATUS(Nstp) = ISTATUS(Nstp) + 1

!~~~>    Compute LU decomposition 
   IF (.NOT.SaveLU) THEN
     CALL JacTemplate(T,Ystage(1),Ghimj)
     ISTATUS(Njac) = ISTATUS(Njac) + 1
     Tau = ONE/(Direction*H*ros_Gamma(1))
#ifdef FULL_ALGEBRA
     Ghimj(1:NVAR,1:NVAR) = -Ghimj(1:NVAR,1:NVAR)
     DO i=1,NVAR
       Ghimj(i,i) = Ghimj(i,i)+Tau
     END DO
#else
     CALL WSCAL(LU_NONZERO,(-ONE),Ghimj,1)
     DO i=1,NVAR
       Ghimj(LU_DIAG(i)) = Ghimj(LU_DIAG(i))+Tau
     END DO
#endif
     CALL ros_Decomp( Ghimj, Pivot, j )
   END IF
            
!~~~>   Compute Hessian at the beginning of the interval
   CALL HessTemplate(T,Ystage(1),Hes0)
   
!~~~>   Compute the stages
Stage: DO istage = ros_S, 1, -1
      
      !~~~> Current istage first entry 
       istart = NVAR*(istage-1) + 1
      
      !~~~> Compute U
       DO m = 1,NADJ
         CALL WCOPY(NVAR,Lambda(1,m),1,U(istart,m),1)
         CALL WSCAL(NVAR,ros_M(istage),U(istart,m),1)
       END DO ! m=1:NADJ
       DO j = istage+1, ros_S
         jstart = NVAR*(j-1) + 1
         HA = ros_A((j-1)*(j-2)/2+istage)
         HC = ros_C((j-1)*(j-2)/2+istage)/(Direction*H)
         DO m = 1,NADJ
           CALL WAXPY(NVAR,HA,V(jstart,m),1,U(istart,m),1) 
           CALL WAXPY(NVAR,HC,U(jstart,m),1,U(istart,m),1) 
         END DO ! m=1:NADJ
       END DO
       DO m = 1,NADJ
         CALL ros_Solve('T', Ghimj, Pivot, U(istart,m))
       END DO ! m=1:NADJ
      !~~~> Compute V 
       Tau = T + ros_Alpha(istage)*Direction*H
       CALL JacTemplate(Tau,Ystage(istart),Jac)
       ISTATUS(Njac) = ISTATUS(Njac) + 1
       DO m = 1,NADJ
#ifdef FULL_ALGEBRA
         V(istart:istart+NVAR-1,m) = MATMUL(TRANSPOSE(Jac),U(istart:istart+NVAR-1,m))
#else
         CALL JacTR_SP_Vec(Jac,U(istart,m),V(istart,m)) 
#endif         
       END DO ! m=1:NADJ
             
   END DO Stage     

   IF (.NOT.Autonomous) THEN
!~~~>  Compute the Jacobian derivative with respect to T. 
!      Last "Jac" computed for stage 1
      CALL ros_JacTimeDerivative ( T, Roundoff, Ystage(1), Jac, dJdT )
   END IF

!~~~>  Compute the new solution 
   
      !~~~>  Compute Lambda 
      DO istage=1,ros_S
         istart = NVAR*(istage-1) + 1
         DO m = 1,NADJ
           ! Add V_i
           CALL WAXPY(NVAR,ONE,V(istart,m),1,Lambda(1,m),1)
           ! Add (H0xK_i)^T * U_i
           CALL HessTR_Vec ( Hes0, U(istart,m), K(istart), Tmp )
           CALL WAXPY(NVAR,ONE,Tmp,1,Lambda(1,m),1)
         END DO ! m=1:NADJ
      END DO
     ! Add H * dJac_dT_0^T * \sum(gamma_i U_i)
     ! Tmp holds sum gamma_i U_i
      IF (.NOT.Autonomous) THEN
         DO m = 1,NADJ
           Tmp(1:NVAR) = ZERO
           DO istage = 1, ros_S
             istart = NVAR*(istage-1) + 1
             CALL WAXPY(NVAR,ros_Gamma(istage),U(istart,m),1,Tmp,1)
           END DO  
#ifdef FULL_ALGEBRA
           Tmp2 = MATMUL(TRANSPOSE(dJdT),Tmp)
#else
           CALL JacTR_SP_Vec(dJdT,Tmp,Tmp2) 
#endif           
           CALL WAXPY(NVAR,H,Tmp2,1,Lambda(1,m),1)
         END DO ! m=1:NADJ
      END IF ! .NOT.Autonomous
 

   END DO TimeLoop 
   
!~~~> Save last state
   
!~~~> Succesful exit
   IERR = 1  !~~~> The integration was successful

!~~~~~~~~~~~~~~~~~~~~~~~~~~~~~~~~~~~~~~~~~~~~~~~~~~~~~~~~~~~~~~~~~~~~~~~~~~~~
  END SUBROUTINE ros_DadjInt
!~~~~~~~~~~~~~~~~~~~~~~~~~~~~~~~~~~~~~~~~~~~~~~~~~~~~~~~~~~~~~~~~~~~~~~~~~~~~
   
   
    
!~~~~~~~~~~~~~~~~~~~~~~~~~~~~~~~~~~~~~~~~~~~~~~~~~~~~~~~~~~~~~~~~~~~~~~~~~~~~
 SUBROUTINE ros_CadjInt (                        &
        NADJ, Y,                                 &
        Tstart, Tend, T,                         &
        AbsTol_adj, RelTol_adj,                  &
!~~~> Error indicator
        IERR )
!~~~~~~~~~~~~~~~~~~~~~~~~~~~~~~~~~~~~~~~~~~~~~~~~~~~~~~~~~~~~~~~~~~~~~~~~~~~~
!   Template for the implementation of a generic RosenbrockADJ method 
!      defined by ros_S (no of stages)  
!      and its coefficients ros_{A,C,M,E,Alpha,Gamma}
!~~~~~~~~~~~~~~~~~~~~~~~~~~~~~~~~~~~~~~~~~~~~~~~~~~~~~~~~~~~~~~~~~~~~~~~~~~~~

  IMPLICIT NONE
   
!~~~> Input: the initial condition at Tstart; Output: the solution at T   
   INTEGER, INTENT(IN) :: NADJ
   KPP_REAL, INTENT(INOUT) :: Y(NVAR,NADJ)
!~~~> Input: integration interval   
   KPP_REAL, INTENT(IN) :: Tstart,Tend      
!~~~> Input: adjoint tolerances   
   KPP_REAL, INTENT(IN) :: AbsTol_adj(NVAR,NADJ), RelTol_adj(NVAR,NADJ)
!~~~> Output: time at which the solution is returned (T=Tend if success)   
   KPP_REAL, INTENT(OUT) ::  T      
!~~~> Output: Error indicator
   INTEGER, INTENT(OUT) :: IERR
! ~~~~ Local variables        
   KPP_REAL :: Y0(NVAR)
   KPP_REAL :: Ynew(NVAR,NADJ), Fcn0(NVAR,NADJ), Fcn(NVAR,NADJ) 
   KPP_REAL :: K(NVAR*ros_S,NADJ), dFdT(NVAR,NADJ)
#ifdef FULL_ALGEBRA
   KPP_REAL, DIMENSION(NVAR,NVAR)  :: Jac0, Ghimj, Jac, dJdT
#else
   KPP_REAL, DIMENSION(LU_NONZERO) :: Jac0, Ghimj, Jac, dJdT
#endif   
   KPP_REAL :: H, Hnew, HC, HG, Fac, Tau 
   KPP_REAL :: Err, Yerr(NVAR,NADJ)
   INTEGER :: Pivot(NVAR), Direction, ioffset, j, istage, iadj
   LOGICAL :: RejectLastH, RejectMoreH, Singular
!~~~>  Local parameters
   KPP_REAL, PARAMETER :: ZERO = 0.0d0, ONE  = 1.0d0 
   KPP_REAL, PARAMETER :: DeltaMin = 1.0d-5
!~~~~~~~~~~~~~~~~~~~~~~~~~~~~~~~~~~~~~~~~~~~~~~~~~~~~~~~~~~~~~~~~~~~~~~~~~~~~

   
!~~~>  Initial preparations
   T = Tstart
   RSTATUS(Nhexit) = 0.0_dp
   H = MIN( MAX(ABS(Hmin),ABS(Hstart)) , ABS(Hmax) )
   IF (ABS(H) <= 10.0_dp*Roundoff) H = DeltaMin
   
   IF (Tend  >=  Tstart) THEN
     Direction = +1
   ELSE
     Direction = -1
   END IF               
   H = Direction*H

   RejectLastH=.FALSE.
   RejectMoreH=.FALSE.
   
!~~~> Time loop begins below 

TimeLoop: DO WHILE ( (Direction > 0).AND.((T-Tend)+Roundoff <= ZERO) &
       .OR. (Direction < 0).AND.((Tend-T)+Roundoff <= ZERO) ) 
      
   IF ( ISTATUS(Nstp) > Max_no_steps ) THEN  ! Too many steps
      CALL ros_ErrorMsg(-6,T,H,IERR)
      RETURN
   END IF
   IF ( ((T+0.1d0*H) == T).OR.(H <= Roundoff) ) THEN  ! Step size too small
      CALL ros_ErrorMsg(-7,T,H,IERR)
      RETURN
   END IF
   
!~~~>  Limit H if necessary to avoid going beyond Tend   
   RSTATUS(Nhexit) = H
   H = MIN(H,ABS(Tend-T))

!~~~>   Interpolate forward solution
   CALL ros_cadj_Y( T, Y0 )     
!~~~>   Compute the Jacobian at current time
   CALL JacTemplate(T, Y0, Jac0)
   ISTATUS(Njac) = ISTATUS(Njac) + 1
   
!~~~>  Compute the function derivative with respect to T
   IF (.NOT.Autonomous) THEN
      CALL ros_JacTimeDerivative ( T, Roundoff, Y0, &
                Jac0, dJdT )
      DO iadj = 1, NADJ
#ifdef FULL_ALGEBRA
        dFdT(1:NVAR,iadj) = MATMUL(TRANSPOSE(dJdT),Y(1:NVAR,iadj))
#else
        CALL JacTR_SP_Vec(dJdT,Y(1,iadj),dFdT(1,iadj))
#endif
        CALL WSCAL(NVAR,(-ONE),dFdT(1,iadj),1)
      END DO
   END IF

!~~~>  Ydot = -J^T*Y
#ifdef FULL_ALGEBRA
   Jac0(1:NVAR,1:NVAR) = -Jac0(1:NVAR,1:NVAR)
#else
   CALL WSCAL(LU_NONZERO,(-ONE),Jac0,1)
#endif
   DO iadj = 1, NADJ
#ifdef FULL_ALGEBRA
     Fcn0(1:NVAR,iadj) = MATMUL(TRANSPOSE(Jac0),Y(1:NVAR,iadj))
#else
     CALL JacTR_SP_Vec(Jac0,Y(1,iadj),Fcn0(1,iadj))
#endif
   END DO
    
!~~~>  Repeat step calculation until current step accepted
UntilAccepted: DO  
   
   CALL ros_PrepareMatrix(H,Direction,ros_Gamma(1), &
          Jac0,Ghimj,Pivot,Singular)
   IF (Singular) THEN ! More than 5 consecutive failed decompositions
       CALL ros_ErrorMsg(-8,T,H,IERR)
       RETURN
   END IF

!~~~>   Compute the stages
Stage: DO istage = 1, ros_S
      
      ! Current istage offset. Current istage vector is K(ioffset+1:ioffset+NVAR)
       ioffset = NVAR*(istage-1)
      
      ! For the 1st istage the function has been computed previously
       IF ( istage == 1 ) THEN
         DO iadj = 1, NADJ
           CALL WCOPY(NVAR,Fcn0(1,iadj),1,Fcn(1,iadj),1)
         END DO
      ! istage>1 and a new function evaluation is needed at the current istage
       ELSEIF ( ros_NewF(istage) ) THEN
         CALL WCOPY(NVAR*NADJ,Y,1,Ynew,1)
         DO j = 1, istage-1
           DO iadj = 1, NADJ
             CALL WAXPY(NVAR,ros_A((istage-1)*(istage-2)/2+j), &
                K(NVAR*(j-1)+1,iadj),1,Ynew(1,iadj),1) 
           END DO       
         END DO
         Tau = T + ros_Alpha(istage)*Direction*H
         ! CALL FunTemplate(Tau,Ynew,Fcn)
         ! ISTATUS(Nfun) = ISTATUS(Nfun) + 1
         CALL ros_cadj_Y( Tau, Y0 )     
         CALL JacTemplate(Tau, Y0, Jac)
         ISTATUS(Njac) = ISTATUS(Njac) + 1
#ifdef FULL_ALGEBRA
         Jac(1:NVAR,1:NVAR) = -Jac(1:NVAR,1:NVAR)
#else
         CALL WSCAL(LU_NONZERO,(-ONE),Jac,1)
#endif
         DO iadj = 1, NADJ
#ifdef FULL_ALGEBRA
             Fcn(1:NVAR,iadj) = MATMUL(TRANSPOSE(Jac),Ynew(1:NVAR,iadj))
#else
             CALL JacTR_SP_Vec(Jac,Ynew(1,iadj),Fcn(1,iadj))
#endif
             !CALL WSCAL(NVAR,(-ONE),Fcn(1,iadj),1)
         END DO
       END IF ! if istage == 1 elseif ros_NewF(istage)

       DO iadj = 1, NADJ
          CALL WCOPY(NVAR,Fcn(1,iadj),1,K(ioffset+1,iadj),1)
       END DO
       DO j = 1, istage-1
         HC = ros_C((istage-1)*(istage-2)/2+j)/(Direction*H)
         DO iadj = 1, NADJ
           CALL WAXPY(NVAR,HC,K(NVAR*(j-1)+1,iadj),1, &
                  K(ioffset+1,iadj),1)
         END DO
       END DO
       IF ((.NOT. Autonomous).AND.(ros_Gamma(istage).NE.ZERO)) THEN
         HG = Direction*H*ros_Gamma(istage)
         DO iadj = 1, NADJ
           CALL WAXPY(NVAR,HG,dFdT(1,iadj),1,K(ioffset+1,iadj),1)
         END DO
       END IF
       DO iadj = 1, NADJ
         CALL ros_Solve('T', Ghimj, Pivot, K(ioffset+1,iadj))
       END DO
      
   END DO Stage     
            

!~~~>  Compute the new solution 
   DO iadj = 1, NADJ
      CALL WCOPY(NVAR,Y(1,iadj),1,Ynew(1,iadj),1)
      DO j=1,ros_S
         CALL WAXPY(NVAR,ros_M(j),K(NVAR*(j-1)+1,iadj),1,Ynew(1,iadj),1)
      END DO
   END DO

!~~~>  Compute the error estimation 
   CALL WSCAL(NVAR*NADJ,ZERO,Yerr,1)
   DO j=1,ros_S     
       DO iadj = 1, NADJ
        CALL WAXPY(NVAR,ros_E(j),K(NVAR*(j-1)+1,iadj),1,Yerr(1,iadj),1)
       END DO
   END DO
!~~~> Max error among all adjoint components    
   iadj = 1
   Err = ros_ErrorNorm ( Y(1,iadj), Ynew(1,iadj), Yerr(1,iadj), &
              AbsTol_adj(1,iadj), RelTol_adj(1,iadj), VectorTol )

!~~~> New step size is bounded by FacMin <= Hnew/H <= FacMax
   Fac  = MIN(FacMax,MAX(FacMin,FacSafe/Err**(ONE/ros_ELO)))
   Hnew = H*Fac  

!~~~>  Check the error magnitude and adjust step size
!   ISTATUS(Nstp) = ISTATUS(Nstp) + 1
   IF ( (Err <= ONE).OR.(H <= Hmin) ) THEN  !~~~> Accept step
      ISTATUS(Nacc) = ISTATUS(Nacc) + 1
      CALL WCOPY(NVAR*NADJ,Ynew,1,Y,1)
      T = T + Direction*H
      Hnew = MAX(Hmin,MIN(Hnew,Hmax))
      IF (RejectLastH) THEN  ! No step size increase after a rejected step
         Hnew = MIN(Hnew,H) 
      END IF   
      RSTATUS(Nhexit) = H
      RSTATUS(Nhnew)  = Hnew
      RSTATUS(Ntexit) = T
      RejectLastH = .FALSE.  
      RejectMoreH = .FALSE.
      H = Hnew      
      EXIT UntilAccepted ! EXIT THE LOOP: WHILE STEP NOT ACCEPTED
   ELSE           !~~~> Reject step
      IF (RejectMoreH) THEN
         Hnew = H*FacRej
      END IF   
      RejectMoreH = RejectLastH
      RejectLastH = .TRUE.
      H = Hnew
      IF (ISTATUS(Nacc) >= 1) THEN
         ISTATUS(Nrej) = ISTATUS(Nrej) + 1
      END IF    
   END IF ! Err <= 1

   END DO UntilAccepted 

   END DO TimeLoop 
      
!~~~> Succesful exit
   IERR = 1  !~~~> The integration was successful

  END SUBROUTINE ros_CadjInt
  
     
!~~~~~~~~~~~~~~~~~~~~~~~~~~~~~~~~~~~~~~~~~~~~~~~~~~~~~~~~~~~~~~~~~~~~~~~~~~~~
 SUBROUTINE ros_SimpleCadjInt (                  &
        NADJ, Y,                                 &
        Tstart, Tend, T,                         &
!~~~> Error indicator
        IERR )
!~~~~~~~~~~~~~~~~~~~~~~~~~~~~~~~~~~~~~~~~~~~~~~~~~~~~~~~~~~~~~~~~~~~~~~~~~~~~
!   Template for the implementation of a generic RosenbrockADJ method 
!      defined by ros_S (no of stages)  
!      and its coefficients ros_{A,C,M,E,Alpha,Gamma}
!~~~~~~~~~~~~~~~~~~~~~~~~~~~~~~~~~~~~~~~~~~~~~~~~~~~~~~~~~~~~~~~~~~~~~~~~~~~~

  IMPLICIT NONE
   
!~~~> Input: the initial condition at Tstart; Output: the solution at T   
   INTEGER, INTENT(IN) :: NADJ
   KPP_REAL, INTENT(INOUT) :: Y(NVAR,NADJ)
!~~~> Input: integration interval   
   KPP_REAL, INTENT(IN) :: Tstart,Tend      
!~~~> Output: time at which the solution is returned (T=Tend if success)   
   KPP_REAL, INTENT(OUT) ::  T      
!~~~> Output: Error indicator
   INTEGER, INTENT(OUT) :: IERR
! ~~~~ Local variables        
   KPP_REAL :: Y0(NVAR)
   KPP_REAL :: Ynew(NVAR,NADJ), Fcn0(NVAR,NADJ), Fcn(NVAR,NADJ) 
   KPP_REAL :: K(NVAR*ros_S,NADJ), dFdT(NVAR,NADJ)
#ifdef FULL_ALGEBRA
   KPP_REAL,DIMENSION(NVAR,NVAR)  :: Jac0, Ghimj, Jac, dJdT
#else   
   KPP_REAL,DIMENSION(LU_NONZERO) :: Jac0, Ghimj, Jac, dJdT
#endif   
   KPP_REAL :: H, HC, HG, Tau 
   KPP_REAL :: ghinv
   INTEGER :: Pivot(NVAR), Direction, ioffset, i, j, istage, iadj
   INTEGER :: istack
!~~~>  Local parameters
   KPP_REAL, PARAMETER :: ZERO = 0.0d0, ONE  = 1.0d0 
   KPP_REAL, PARAMETER :: DeltaMin = 1.0d-5
!~~~>  Locally called functions
!    KPP_REAL WLAMCH
!    EXTERNAL WLAMCH
!~~~~~~~~~~~~~~~~~~~~~~~~~~~~~~~~~~~~~~~~~~~~~~~~~~~~~~~~~~~~~~~~~~~~~~~~~~~~

   
!~~~>  INITIAL PREPARATIONS
   
   IF (Tend  >=  Tstart) THEN
     Direction = -1
   ELSE
     Direction = +1
   END IF               
   
!~~~> Time loop begins below 
TimeLoop: DO istack = stack_ptr,2,-1
        
   T = chk_T(istack)
   H = chk_H(istack-1)
   !CALL WCOPY(NVAR,chk_Y(1,istack),1,Y0,1)
   Y0(1:NVAR) = chk_Y(1:NVAR,istack)
   
!~~~>   Compute the Jacobian at current time
   CALL JacTemplate(T, Y0, Jac0)
   ISTATUS(Njac) = ISTATUS(Njac) + 1
   
!~~~>  Compute the function derivative with respect to T
   IF (.NOT.Autonomous) THEN
      CALL ros_JacTimeDerivative ( T, Roundoff, Y0, &
                Jac0, dJdT )
      DO iadj = 1, NADJ
#ifdef FULL_ALGEBRA
        dFdT(1:NVAR,iadj) = MATMUL(TRANSPOSE(dJdT),Y(1:NVAR,iadj))
#else
        CALL JacTR_SP_Vec(dJdT,Y(1,iadj),dFdT(1,iadj))
#endif
        CALL WSCAL(NVAR,(-ONE),dFdT(1,iadj),1)
      END DO
   END IF

!~~~>  Ydot = -J^T*Y
#ifdef FULL_ALGEBRA
   Jac0(1:NVAR,1:NVAR) = -Jac0(1:NVAR,1:NVAR)
#else
   CALL WSCAL(LU_NONZERO,(-ONE),Jac0,1)
#endif
   DO iadj = 1, NADJ
#ifdef FULL_ALGEBRA
     Fcn0(1:NVAR,iadj) = MATMUL(TRANSPOSE(Jac0),Y(1:NVAR,iadj))
#else
     CALL JacTR_SP_Vec(Jac0,Y(1,iadj),Fcn0(1,iadj))
#endif
   END DO
   
!~~~>    Construct Ghimj = 1/(H*ham) - Jac0
     ghinv = ONE/(Direction*H*ros_Gamma(1))
#ifdef FULL_ALGEBRA
     Ghimj(1:NVAR,1:NVAR) = -Jac0(1:NVAR,1:NVAR)
     DO i=1,NVAR
       Ghimj(i,i) = Ghimj(i,i)+ghinv
     END DO
#else
     CALL WCOPY(LU_NONZERO,Jac0,1,Ghimj,1)
     CALL WSCAL(LU_NONZERO,(-ONE),Ghimj,1)
     DO i=1,NVAR
       Ghimj(LU_DIAG(i)) = Ghimj(LU_DIAG(i))+ghinv
     END DO
#endif
!~~~>    Compute LU decomposition 
     CALL ros_Decomp( Ghimj, Pivot, j )
     IF (j /= 0) THEN
       CALL ros_ErrorMsg(-8,T,H,IERR)
       PRINT*,' The matrix is singular !'
       STOP
   END IF

!~~~>   Compute the stages
Stage: DO istage = 1, ros_S
      
      ! Current istage offset. Current istage vector is K(ioffset+1:ioffset+NVAR)
       ioffset = NVAR*(istage-1)
      
      ! For the 1st istage the function has been computed previously
       IF ( istage == 1 ) THEN
         DO iadj = 1, NADJ
           CALL WCOPY(NVAR,Fcn0(1,iadj),1,Fcn(1,iadj),1)
         END DO
      ! istage>1 and a new function evaluation is needed at the current istage
       ELSEIF ( ros_NewF(istage) ) THEN
         CALL WCOPY(NVAR*NADJ,Y,1,Ynew,1)
         DO j = 1, istage-1
           DO iadj = 1, NADJ
             CALL WAXPY(NVAR,ros_A((istage-1)*(istage-2)/2+j), &
                K(NVAR*(j-1)+1,iadj),1,Ynew(1,iadj),1) 
           END DO       
         END DO
         Tau = T + ros_Alpha(istage)*Direction*H
         CALL ros_Hermite3( chk_T(istack-1), chk_T(istack), Tau, &
             chk_Y(1:NVAR,istack-1), chk_Y(1:NVAR,istack),       &
             chk_dY(1:NVAR,istack-1), chk_dY(1:NVAR,istack), Y0 )
         CALL JacTemplate(Tau, Y0, Jac)
         ISTATUS(Njac) = ISTATUS(Njac) + 1
#ifdef FULL_ALGEBRA
         Jac(1:NVAR,1:NVAR) = -Jac(1:NVAR,1:NVAR)
#else
         CALL WSCAL(LU_NONZERO,(-ONE),Jac,1)
#endif
         DO iadj = 1, NADJ
#ifdef FULL_ALGEBRA
             Fcn(1:NVAR,iadj) = MATMUL(TRANSPOSE(Jac),Ynew(1:NVAR,iadj))
#else
             CALL JacTR_SP_Vec(Jac,Ynew(1,iadj),Fcn(1,iadj))
#endif
         END DO
       END IF ! if istage == 1 elseif ros_NewF(istage)

       DO iadj = 1, NADJ
          CALL WCOPY(NVAR,Fcn(1,iadj),1,K(ioffset+1,iadj),1)
       END DO
       DO j = 1, istage-1
         HC = ros_C((istage-1)*(istage-2)/2+j)/(Direction*H)
         DO iadj = 1, NADJ
           CALL WAXPY(NVAR,HC,K(NVAR*(j-1)+1,iadj),1, &
                  K(ioffset+1,iadj),1)
         END DO
       END DO
       IF ((.NOT. Autonomous).AND.(ros_Gamma(istage).NE.ZERO)) THEN
         HG = Direction*H*ros_Gamma(istage)
         DO iadj = 1, NADJ
           CALL WAXPY(NVAR,HG,dFdT(1,iadj),1,K(ioffset+1,iadj),1)
         END DO
       END IF
       DO iadj = 1, NADJ
         CALL ros_Solve('T', Ghimj, Pivot, K(ioffset+1,iadj))
       END DO
      
   END DO Stage     
            

!~~~>  Compute the new solution 
   DO iadj = 1, NADJ
      DO j=1,ros_S
         CALL WAXPY(NVAR,ros_M(j),K(NVAR*(j-1)+1,iadj),1,Y(1,iadj),1)
      END DO
   END DO

   END DO TimeLoop 
      
!~~~> Succesful exit
   IERR = 1  !~~~> The integration was successful

  END SUBROUTINE ros_SimpleCadjInt
  
!~~~~~~~~~~~~~~~~~~~~~~~~~~~~~~~~~~~~~~~~~~~~~~~~~~~~~~~~~~~~~~~~~~~~~~~~~~~~
  KPP_REAL FUNCTION ros_ErrorNorm ( Y, Ynew, Yerr, & 
               AbsTol, RelTol, VectorTol )
!~~~~~~~~~~~~~~~~~~~~~~~~~~~~~~~~~~~~~~~~~~~~~~~~~~~~~~~~~~~~~~~~~~~~~~~~~~~~
!~~~> Computes the "scaled norm" of the error vector Yerr
!~~~~~~~~~~~~~~~~~~~~~~~~~~~~~~~~~~~~~~~~~~~~~~~~~~~~~~~~~~~~~~~~~~~~~~~~~~~~
   IMPLICIT NONE         

! Input arguments   
   KPP_REAL, INTENT(IN) :: Y(NVAR), Ynew(NVAR), &
          Yerr(NVAR), AbsTol(NVAR), RelTol(NVAR)
   LOGICAL, INTENT(IN) ::  VectorTol
! Local variables     
   KPP_REAL :: Err, Scale, Ymax   
   INTEGER  :: i
   
   Err = ZERO
   DO i=1,NVAR
     Ymax = MAX(ABS(Y(i)),ABS(Ynew(i)))
     IF (VectorTol) THEN
       Scale = AbsTol(i)+RelTol(i)*Ymax
     ELSE
       Scale = AbsTol(1)+RelTol(1)*Ymax
     END IF
     Err = Err+(Yerr(i)/Scale)**2
   END DO
   Err  = SQRT(Err/NVAR)

   ros_ErrorNorm = MAX(Err,1.0d-10)
   
  END FUNCTION ros_ErrorNorm


!~~~~~~~~~~~~~~~~~~~~~~~~~~~~~~~~~~~~~~~~~~~~~~~~~~~~~~~~~~~~~~~~~~~~~~~~~~~~
  SUBROUTINE ros_FunTimeDerivative ( T, Roundoff, Y, Fcn0, dFdT )
!~~~~~~~~~~~~~~~~~~~~~~~~~~~~~~~~~~~~~~~~~~~~~~~~~~~~~~~~~~~~~~~~~~~~~~~~~~~~
!~~~> The time partial derivative of the function by finite differences
!~~~~~~~~~~~~~~~~~~~~~~~~~~~~~~~~~~~~~~~~~~~~~~~~~~~~~~~~~~~~~~~~~~~~~~~~~~~~
   IMPLICIT NONE         

!~~~> Input arguments   
   KPP_REAL, INTENT(IN) :: T, Roundoff, Y(NVAR), Fcn0(NVAR) 
!~~~> Output arguments   
   KPP_REAL, INTENT(OUT) :: dFdT(NVAR)   
!~~~> Local variables     
   KPP_REAL :: Delta  
   KPP_REAL, PARAMETER :: ONE = 1.0d0, DeltaMin = 1.0d-6
   
   Delta = SQRT(Roundoff)*MAX(DeltaMin,ABS(T))
   CALL FunTemplate(T+Delta,Y,dFdT)
   ISTATUS(Nfun) = ISTATUS(Nfun) + 1
   CALL WAXPY(NVAR,(-ONE),Fcn0,1,dFdT,1)
   CALL WSCAL(NVAR,(ONE/Delta),dFdT,1)

  END SUBROUTINE ros_FunTimeDerivative


!~~~~~~~~~~~~~~~~~~~~~~~~~~~~~~~~~~~~~~~~~~~~~~~~~~~~~~~~~~~~~~~~~~~~~~~~~~~~
  SUBROUTINE ros_JacTimeDerivative ( T, Roundoff, Y, &
                Jac0, dJdT )
!~~~~~~~~~~~~~~~~~~~~~~~~~~~~~~~~~~~~~~~~~~~~~~~~~~~~~~~~~~~~~~~~~~~~~~~~~~~~
!~~~> The time partial derivative of the Jacobian by finite differences
!~~~~~~~~~~~~~~~~~~~~~~~~~~~~~~~~~~~~~~~~~~~~~~~~~~~~~~~~~~~~~~~~~~~~~~~~~~~~
   IMPLICIT NONE         

!~~~> Arguments   
   KPP_REAL, INTENT(IN) :: T, Roundoff, Y(NVAR)
#ifdef FULL_ALGEBRA    
   KPP_REAL, INTENT(IN)  :: Jac0(NVAR,NVAR) 
   KPP_REAL, INTENT(OUT) :: dJdT(NVAR,NVAR)   
#else
   KPP_REAL, INTENT(IN)  :: Jac0(LU_NONZERO) 
   KPP_REAL, INTENT(OUT) :: dJdT(LU_NONZERO)   
#endif   
!~~~> Local variables     
   KPP_REAL :: Delta  
   
   Delta = SQRT(Roundoff)*MAX(DeltaMin,ABS(T))
   CALL JacTemplate(T+Delta,Y,dJdT)
   ISTATUS(Njac) = ISTATUS(Njac) + 1
#ifdef FULL_ALGEBRA    
   CALL WAXPY(NVAR*NVAR,(-ONE),Jac0,1,dJdT,1)
   CALL WSCAL(NVAR*NVAR,(ONE/Delta),dJdT,1)
#else
   CALL WAXPY(LU_NONZERO,(-ONE),Jac0,1,dJdT,1)
   CALL WSCAL(LU_NONZERO,(ONE/Delta),dJdT,1)
#endif   

  END SUBROUTINE ros_JacTimeDerivative


!~~~~~~~~~~~~~~~~~~~~~~~~~~~~~~~~~~~~~~~~~~~~~~~~~~~~~~~~~~~~~~~~~~~~~~~~~~~~
  SUBROUTINE ros_PrepareMatrix ( H, Direction, gam, &
             Jac0, Ghimj, Pivot, Singular )
! --- --- --- --- --- --- --- --- --- --- --- --- ---
!  Prepares the LHS matrix for stage calculations
!  1.  Construct Ghimj = 1/(H*gam) - Jac0
!      "(Gamma H) Inverse Minus Jacobian"
!  2.  Repeat LU decomposition of Ghimj until successful.
!       -half the step size if LU decomposition fails and retry
!       -exit after 5 consecutive fails
! --- --- --- --- --- --- --- --- --- --- --- --- ---
   IMPLICIT NONE

!~~~> Input arguments
#ifdef FULL_ALGEBRA    
   KPP_REAL, INTENT(IN) ::  Jac0(NVAR,NVAR)
#else
   KPP_REAL, INTENT(IN) ::  Jac0(LU_NONZERO)
#endif   
   KPP_REAL, INTENT(IN) ::  gam
   INTEGER, INTENT(IN) ::  Direction
!~~~> Output arguments
#ifdef FULL_ALGEBRA    
   KPP_REAL, INTENT(OUT) :: Ghimj(NVAR,NVAR)
#else
   KPP_REAL, INTENT(OUT) :: Ghimj(LU_NONZERO)
#endif   
   LOGICAL, INTENT(OUT) ::  Singular
   INTEGER, INTENT(OUT) ::  Pivot(NVAR)
!~~~> Inout arguments
   KPP_REAL, INTENT(INOUT) :: H   ! step size is decreased when LU fails
!~~~> Local variables
   INTEGER  :: i, ising, Nconsecutive
   KPP_REAL :: ghinv
   KPP_REAL, PARAMETER :: ONE  = 1.0_dp, HALF = 0.5_dp

   Nconsecutive = 0
   Singular = .TRUE.

   DO WHILE (Singular)

!~~~>    Construct Ghimj = 1/(H*gam) - Jac0
#ifdef FULL_ALGEBRA    
     CALL WCOPY(NVAR*NVAR,Jac0,1,Ghimj,1)
     CALL WSCAL(NVAR*NVAR,(-ONE),Ghimj,1)
     ghinv = ONE/(Direction*H*gam)
     DO i=1,NVAR
       Ghimj(i,i) = Ghimj(i,i)+ghinv
     END DO
#else
     CALL WCOPY(LU_NONZERO,Jac0,1,Ghimj,1)
     CALL WSCAL(LU_NONZERO,(-ONE),Ghimj,1)
     ghinv = ONE/(Direction*H*gam)
     DO i=1,NVAR
       Ghimj(LU_DIAG(i)) = Ghimj(LU_DIAG(i))+ghinv
     END DO
#endif   
!~~~>    Compute LU decomposition
     CALL ros_Decomp( Ghimj, Pivot, ising )
     IF (ising == 0) THEN
!~~~>    If successful done
        Singular = .FALSE.
     ELSE ! ising .ne. 0
!~~~>    If unsuccessful half the step size; if 5 consecutive fails then return
        ISTATUS(Nsng) = ISTATUS(Nsng) + 1
        Nconsecutive = Nconsecutive+1
        Singular = .TRUE.
        PRINT*,'Warning: LU Decomposition returned ising = ',ising
        IF (Nconsecutive <= 5) THEN ! Less than 5 consecutive failed decompositions
           H = H*HALF
        ELSE  ! More than 5 consecutive failed decompositions
           RETURN
        END IF  ! Nconsecutive
      END IF    ! ising

   END DO ! WHILE Singular

  END SUBROUTINE ros_PrepareMatrix


!~~~~~~~~~~~~~~~~~~~~~~~~~~~~~~~~~~~~~~~~~~~~~~~~~~~~~~~~~~~~~~~~~~~~~~~~~~~~
  SUBROUTINE ros_Decomp( A, Pivot, ising )
!~~~~~~~~~~~~~~~~~~~~~~~~~~~~~~~~~~~~~~~~~~~~~~~~~~~~~~~~~~~~~~~~~~~~~~~~~~~~
!  Template for the LU decomposition
!~~~~~~~~~~~~~~~~~~~~~~~~~~~~~~~~~~~~~~~~~~~~~~~~~~~~~~~~~~~~~~~~~~~~~~~~~~~~
   IMPLICIT NONE
!~~~> Inout variables
#ifdef FULL_ALGEBRA    
   KPP_REAL, INTENT(INOUT) :: A(NVAR,NVAR)
#else   
   KPP_REAL, INTENT(INOUT) :: A(LU_NONZERO)
#endif
!~~~> Output variables
   INTEGER, INTENT(OUT) :: Pivot(NVAR), ising

#ifdef FULL_ALGEBRA    
   CALL  DGETRF( NVAR, NVAR, A, NVAR, Pivot, ising )
#else   
   CALL KppDecomp ( A, ising )
   Pivot(1) = 1
#endif
   ISTATUS(Ndec) = ISTATUS(Ndec) + 1

  END SUBROUTINE ros_Decomp


!~~~~~~~~~~~~~~~~~~~~~~~~~~~~~~~~~~~~~~~~~~~~~~~~~~~~~~~~~~~~~~~~~~~~~~~~~~~~
  SUBROUTINE ros_Solve( How, A, Pivot, b )
!~~~~~~~~~~~~~~~~~~~~~~~~~~~~~~~~~~~~~~~~~~~~~~~~~~~~~~~~~~~~~~~~~~~~~~~~~~~~
!  Template for the forward/backward substitution (using pre-computed LU decomposition)
!~~~~~~~~~~~~~~~~~~~~~~~~~~~~~~~~~~~~~~~~~~~~~~~~~~~~~~~~~~~~~~~~~~~~~~~~~~~~
   IMPLICIT NONE
!~~~> Input variables
   CHARACTER, INTENT(IN) :: How
#ifdef FULL_ALGEBRA    
   KPP_REAL, INTENT(IN) :: A(NVAR,NVAR)
#else   
   KPP_REAL, INTENT(IN) :: A(LU_NONZERO)
#endif
   INTEGER, INTENT(IN) :: Pivot(NVAR)
!~~~> InOut variables
   KPP_REAL, INTENT(INOUT) :: b(NVAR)

   SELECT CASE (How)
   CASE ('N')
#ifdef FULL_ALGEBRA    
     CALL DGETRS( 'N', NVAR , 1, A, NVAR, Pivot, b, NVAR, 0 )
#else   
     CALL KppSolve( A, b )
#endif
   CASE ('T')
#ifdef FULL_ALGEBRA    
     CALL DGETRS( 'T', NVAR , 1, A, NVAR, Pivot, b, NVAR, 0 )
#else   
     CALL KppSolveTR( A, b, b )
#endif
   CASE DEFAULT
     PRINT*,'Error: unknown argument in ros_Solve: How=',How
     STOP
   END SELECT
   ISTATUS(Nsol) = ISTATUS(Nsol) + 1

  END SUBROUTINE ros_Solve

  

!~~~~~~~~~~~~~~~~~~~~~~~~~~~~~~~~~~~~~~~~~~~~~~~~~~~~~~~~~~~~~~~~~~~~~~~~~~~~   
  SUBROUTINE ros_cadj_Y( T, Y )
!~~~~~~~~~~~~~~~~~~~~~~~~~~~~~~~~~~~~~~~~~~~~~~~~~~~~~~~~~~~~~~~~~~~~~~~~~~~~  
!  Finds the solution Y at T by interpolating the stored forward trajectory
!~~~~~~~~~~~~~~~~~~~~~~~~~~~~~~~~~~~~~~~~~~~~~~~~~~~~~~~~~~~~~~~~~~~~~~~~~~~~   
   IMPLICIT NONE
!~~~> Input variables 
   KPP_REAL, INTENT(IN) :: T
!~~~> Output variables     
   KPP_REAL, INTENT(OUT) :: Y(NVAR)
!~~~> Local variables     
   INTEGER     :: i
   KPP_REAL, PARAMETER  :: ONE = 1.0d0

!   chk_H, chk_T, chk_Y, chk_dY, chk_d2Y

   IF( (T < chk_T(1)).OR.(T> chk_T(stack_ptr)) ) THEN
      PRINT*,'Cannot locate solution at T = ',T
      PRINT*,'Stored trajectory is between Tstart = ',chk_T(1)
      PRINT*,'    and Tend = ',chk_T(stack_ptr)
      STOP
   END IF
   DO i = 1, stack_ptr-1
     IF( (T>= chk_T(i)).AND.(T<= chk_T(i+1)) ) EXIT
   END DO 


!   IF (.FALSE.) THEN
!
!   CALL ros_Hermite5( chk_T(i), chk_T(i+1), T, &
!                chk_Y(1,i),   chk_Y(1,i+1),     &
!                chk_dY(1,i),  chk_dY(1,i+1),    &
!                chk_d2Y(1,i), chk_d2Y(1,i+1), Y )
!   
!   ELSE
                
   CALL ros_Hermite3( chk_T(i), chk_T(i+1), T, &
                chk_Y(1:NVAR,i),   chk_Y(1:NVAR,i+1),     &
                chk_dY(1:NVAR,i),  chk_dY(1:NVAR,i+1),    &
                Y )
                        
!   
!   END IF       

  END SUBROUTINE ros_cadj_Y
  

!~~~~~~~~~~~~~~~~~~~~~~~~~~~~~~~~~~~~~~~~~~~~~~~~~~~~~~~~~~~~~~~~~~~~~~~~~~~~   
  SUBROUTINE ros_Hermite3( a, b, T, Ya, Yb, Ja, Jb, Y )
!~~~~~~~~~~~~~~~~~~~~~~~~~~~~~~~~~~~~~~~~~~~~~~~~~~~~~~~~~~~~~~~~~~~~~~~~~~~~  
!  Template for Hermite interpolation of order 5 on the interval [a,b]
! P = c(1) + c(2)*(x-a) + ... + c(4)*(x-a)^3
! P[a,b] = [Ya,Yb], P'[a,b] = [Ja,Jb]
!~~~~~~~~~~~~~~~~~~~~~~~~~~~~~~~~~~~~~~~~~~~~~~~~~~~~~~~~~~~~~~~~~~~~~~~~~~~~   
   IMPLICIT NONE
!~~~> Input variables 
   KPP_REAL, INTENT(IN) :: a, b, T, Ya(NVAR), Yb(NVAR)
   KPP_REAL, INTENT(IN) :: Ja(NVAR), Jb(NVAR)
!~~~> Output variables     
   KPP_REAL, INTENT(OUT) :: Y(NVAR)
!~~~> Local variables     
   KPP_REAL :: Tau, amb(3), C(NVAR,4)
   KPP_REAL, PARAMETER :: ZERO = 0.0d0
   INTEGER :: i, j
   
   amb(1) = 1.0d0/(a-b)
   DO i=2,3
     amb(i) = amb(i-1)*amb(1)
   END DO
   
   
! c(1) = ya;
   CALL WCOPY(NVAR,Ya,1,C(1,1),1)
! c(2) = ja;
   CALL WCOPY(NVAR,Ja,1,C(1,2),1)
! c(3) = 2/(a-b)*ja + 1/(a-b)*jb - 3/(a - b)^2*ya + 3/(a - b)^2*yb  ;
   CALL WCOPY(NVAR,Ya,1,C(1,3),1)
   CALL WSCAL(NVAR,-3.0*amb(2),C(1,3),1)
   CALL WAXPY(NVAR,3.0*amb(2),Yb,1,C(1,3),1)
   CALL WAXPY(NVAR,2.0*amb(1),Ja,1,C(1,3),1)
   CALL WAXPY(NVAR,amb(1),Jb,1,C(1,3),1)
! c(4) =  1/(a-b)^2*ja + 1/(a-b)^2*jb - 2/(a-b)^3*ya + 2/(a-b)^3*yb ;
   CALL WCOPY(NVAR,Ya,1,C(1,4),1)
   CALL WSCAL(NVAR,-2.0*amb(3),C(1,4),1)
   CALL WAXPY(NVAR,2.0*amb(3),Yb,1,C(1,4),1)
   CALL WAXPY(NVAR,amb(2),Ja,1,C(1,4),1)
   CALL WAXPY(NVAR,amb(2),Jb,1,C(1,4),1)
   
   Tau = T - a
   CALL WCOPY(NVAR,C(1,4),1,Y,1)
   CALL WSCAL(NVAR,Tau**3,Y,1)
   DO j = 3,1,-1
     CALL WAXPY(NVAR,TAU**(j-1),C(1,j),1,Y,1)
   END DO       

  END SUBROUTINE ros_Hermite3

!~~~~~~~~~~~~~~~~~~~~~~~~~~~~~~~~~~~~~~~~~~~~~~~~~~~~~~~~~~~~~~~~~~~~~~~~~~~~   
  SUBROUTINE ros_Hermite5( a, b, T, Ya, Yb, Ja, Jb, Ha, Hb, Y )
!~~~~~~~~~~~~~~~~~~~~~~~~~~~~~~~~~~~~~~~~~~~~~~~~~~~~~~~~~~~~~~~~~~~~~~~~~~~~  
!  Template for Hermite interpolation of order 5 on the interval [a,b]
! P = c(1) + c(2)*(x-a) + ... + c(6)*(x-a)^5
! P[a,b] = [Ya,Yb], P'[a,b] = [Ja,Jb], P"[a,b] = [Ha,Hb]
!~~~~~~~~~~~~~~~~~~~~~~~~~~~~~~~~~~~~~~~~~~~~~~~~~~~~~~~~~~~~~~~~~~~~~~~~~~~~   
   IMPLICIT NONE
!~~~> Input variables 
   KPP_REAL, INTENT(IN) :: a, b, T, Ya(NVAR), Yb(NVAR)
   KPP_REAL, INTENT(IN) :: Ja(NVAR), Jb(NVAR), Ha(NVAR), Hb(NVAR)
!~~~> Output variables     
   KPP_REAL, INTENT(OUT) :: Y(NVAR)
!~~~> Local variables     
   KPP_REAL :: Tau, amb(5), C(NVAR,6)
   KPP_REAL, PARAMETER :: ZERO = 0.0d0, HALF = 0.5d0
   INTEGER :: i, j
   
   amb(1) = 1.0d0/(a-b)
   DO i=2,5
     amb(i) = amb(i-1)*amb(1)
   END DO
     
! c(1) = ya;
   CALL WCOPY(NVAR,Ya,1,C(1,1),1)
! c(2) = ja;
   CALL WCOPY(NVAR,Ja,1,C(1,2),1)
! c(3) = ha/2;
   CALL WCOPY(NVAR,Ha,1,C(1,3),1)
   CALL WSCAL(NVAR,HALF,C(1,3),1)
   
! c(4) = 10*amb(3)*ya - 10*amb(3)*yb - 6*amb(2)*ja - 4*amb(2)*jb  + 1.5*amb(1)*ha - 0.5*amb(1)*hb ;
   CALL WCOPY(NVAR,Ya,1,C(1,4),1)
   CALL WSCAL(NVAR,10.0*amb(3),C(1,4),1)
   CALL WAXPY(NVAR,-10.0*amb(3),Yb,1,C(1,4),1)
   CALL WAXPY(NVAR,-6.0*amb(2),Ja,1,C(1,4),1)
   CALL WAXPY(NVAR,-4.0*amb(2),Jb,1,C(1,4),1)
   CALL WAXPY(NVAR, 1.5*amb(1),Ha,1,C(1,4),1)
   CALL WAXPY(NVAR,-0.5*amb(1),Hb,1,C(1,4),1)

! c(5) =   15*amb(4)*ya - 15*amb(4)*yb - 8.*amb(3)*ja - 7*amb(3)*jb + 1.5*amb(2)*ha - 1*amb(2)*hb ;
   CALL WCOPY(NVAR,Ya,1,C(1,5),1)
   CALL WSCAL(NVAR, 15.0*amb(4),C(1,5),1)
   CALL WAXPY(NVAR,-15.0*amb(4),Yb,1,C(1,5),1)
   CALL WAXPY(NVAR,-8.0*amb(3),Ja,1,C(1,5),1)
   CALL WAXPY(NVAR,-7.0*amb(3),Jb,1,C(1,5),1)
   CALL WAXPY(NVAR,1.5*amb(2),Ha,1,C(1,5),1)
   CALL WAXPY(NVAR,-amb(2),Hb,1,C(1,5),1)
   
! c(6) =   6*amb(5)*ya - 6*amb(5)*yb - 3.*amb(4)*ja - 3.*amb(4)*jb + 0.5*amb(3)*ha -0.5*amb(3)*hb ;
   CALL WCOPY(NVAR,Ya,1,C(1,6),1)
   CALL WSCAL(NVAR, 6.0*amb(5),C(1,6),1)
   CALL WAXPY(NVAR,-6.0*amb(5),Yb,1,C(1,6),1)
   CALL WAXPY(NVAR,-3.0*amb(4),Ja,1,C(1,6),1)
   CALL WAXPY(NVAR,-3.0*amb(4),Jb,1,C(1,6),1)
   CALL WAXPY(NVAR, 0.5*amb(3),Ha,1,C(1,6),1)
   CALL WAXPY(NVAR,-0.5*amb(3),Hb,1,C(1,6),1)
   
   Tau = T - a
   CALL WCOPY(NVAR,C(1,6),1,Y,1)
   DO j = 5,1,-1
     CALL WSCAL(NVAR,Tau,Y,1)
     CALL WAXPY(NVAR,ONE,C(1,j),1,Y,1)
   END DO       

  END SUBROUTINE ros_Hermite5
 
!~~~~~~~~~~~~~~~~~~~~~~~~~~~~~~~~~~~~~~~~~~~~~~~~~~~~~~~~~~~~~~~~~~~~~~~~~~~~   
  SUBROUTINE Ros2
!~~~~~~~~~~~~~~~~~~~~~~~~~~~~~~~~~~~~~~~~~~~~~~~~~~~~~~~~~~~~~~~~~~~~~~~~~~~~   
! --- AN L-STABLE METHOD, 2 stages, order 2
!~~~~~~~~~~~~~~~~~~~~~~~~~~~~~~~~~~~~~~~~~~~~~~~~~~~~~~~~~~~~~~~~~~~~~~~~~~~~   

    IMPLICIT NONE
    DOUBLE PRECISION g
   
    g = 1.0d0 + 1.0d0/SQRT(2.0d0)
   
    rosMethod = RS2
!~~~> Name of the method
    ros_Name = 'ROS-2'   
!~~~> Number of stages
    ros_S = 2
   
!~~~> The coefficient matrices A and C are strictly lower triangular.
!   The lower triangular (subdiagonal) elements are stored in row-wise order:
!   A(2,1) = ros_A(1), A(3,1)=ros_A(2), A(3,2)=ros_A(3), etc.
!   The general mapping formula is:
!       A(i,j) = ros_A( (i-1)*(i-2)/2 + j )    
!       C(i,j) = ros_C( (i-1)*(i-2)/2 + j )  
   
    ros_A(1) = (1.d0)/g
    ros_C(1) = (-2.d0)/g
!~~~> Does the stage i require a new function evaluation (ros_NewF(i)=TRUE)
!   or does it re-use the function evaluation from stage i-1 (ros_NewF(i)=FALSE)
    ros_NewF(1) = .TRUE.
    ros_NewF(2) = .TRUE.
!~~~> M_i = Coefficients for new step solution
    ros_M(1)= (3.d0)/(2.d0*g)
    ros_M(2)= (1.d0)/(2.d0*g)
! E_i = Coefficients for error estimator    
    ros_E(1) = 1.d0/(2.d0*g)
    ros_E(2) = 1.d0/(2.d0*g)
!~~~> ros_ELO = estimator of local order - the minimum between the
!    main and the embedded scheme orders plus one
    ros_ELO = 2.0d0    
!~~~> Y_stage_i ~ Y( T + H*Alpha_i )
    ros_Alpha(1) = 0.0d0
    ros_Alpha(2) = 1.0d0 
!~~~> Gamma_i = \sum_j  gamma_{i,j}    
    ros_Gamma(1) = g
    ros_Gamma(2) =-g
   
 END SUBROUTINE Ros2


!~~~~~~~~~~~~~~~~~~~~~~~~~~~~~~~~~~~~~~~~~~~~~~~~~~~~~~~~~~~~~~~~~~~~~~~~~~~~   
  SUBROUTINE Ros3
!~~~~~~~~~~~~~~~~~~~~~~~~~~~~~~~~~~~~~~~~~~~~~~~~~~~~~~~~~~~~~~~~~~~~~~~~~~~~   
! --- AN L-STABLE METHOD, 3 stages, order 3, 2 function evaluations
!~~~~~~~~~~~~~~~~~~~~~~~~~~~~~~~~~~~~~~~~~~~~~~~~~~~~~~~~~~~~~~~~~~~~~~~~~~~~   
  
   IMPLICIT NONE
    
    rosMethod = RS3
!~~~> Name of the method
   ros_Name = 'ROS-3'   
!~~~> Number of stages
   ros_S = 3
   
!~~~> The coefficient matrices A and C are strictly lower triangular.
!   The lower triangular (subdiagonal) elements are stored in row-wise order:
!   A(2,1) = ros_A(1), A(3,1)=ros_A(2), A(3,2)=ros_A(3), etc.
!   The general mapping formula is:
!       A(i,j) = ros_A( (i-1)*(i-2)/2 + j )    
!       C(i,j) = ros_C( (i-1)*(i-2)/2 + j )  
     
   ros_A(1)= 1.d0
   ros_A(2)= 1.d0
   ros_A(3)= 0.d0

   ros_C(1) = -0.10156171083877702091975600115545d+01
   ros_C(2) =  0.40759956452537699824805835358067d+01
   ros_C(3) =  0.92076794298330791242156818474003d+01
!~~~> Does the stage i require a new function evaluation (ros_NewF(i)=TRUE)
!   or does it re-use the function evaluation from stage i-1 (ros_NewF(i)=FALSE)
   ros_NewF(1) = .TRUE.
   ros_NewF(2) = .TRUE.
   ros_NewF(3) = .FALSE.
!~~~> M_i = Coefficients for new step solution
   ros_M(1) =  0.1d+01
   ros_M(2) =  0.61697947043828245592553615689730d+01
   ros_M(3) = -0.42772256543218573326238373806514d+00
! E_i = Coefficients for error estimator    
   ros_E(1) =  0.5d+00
   ros_E(2) = -0.29079558716805469821718236208017d+01
   ros_E(3) =  0.22354069897811569627360909276199d+00
!~~~> ros_ELO = estimator of local order - the minimum between the
!    main and the embedded scheme orders plus 1
   ros_ELO = 3.0d0    
!~~~> Y_stage_i ~ Y( T + H*Alpha_i )
   ros_Alpha(1)= 0.0d+00
   ros_Alpha(2)= 0.43586652150845899941601945119356d+00
   ros_Alpha(3)= 0.43586652150845899941601945119356d+00
!~~~> Gamma_i = \sum_j  gamma_{i,j}    
   ros_Gamma(1)= 0.43586652150845899941601945119356d+00
   ros_Gamma(2)= 0.24291996454816804366592249683314d+00
   ros_Gamma(3)= 0.21851380027664058511513169485832d+01

  END SUBROUTINE Ros3

!~~~~~~~~~~~~~~~~~~~~~~~~~~~~~~~~~~~~~~~~~~~~~~~~~~~~~~~~~~~~~~~~~~~~~~~~~~~~   


!~~~~~~~~~~~~~~~~~~~~~~~~~~~~~~~~~~~~~~~~~~~~~~~~~~~~~~~~~~~~~~~~~~~~~~~~~~~~   
  SUBROUTINE Ros4
!~~~~~~~~~~~~~~~~~~~~~~~~~~~~~~~~~~~~~~~~~~~~~~~~~~~~~~~~~~~~~~~~~~~~~~~~~~~~   
!     L-STABLE ROSENBROCK METHOD OF ORDER 4, WITH 4 STAGES
!     L-STABLE EMBEDDED ROSENBROCK METHOD OF ORDER 3 
!
!      E. HAIRER AND G. WANNER, SOLVING ORDINARY DIFFERENTIAL
!      EQUATIONS II. STIFF AND DIFFERENTIAL-ALGEBRAIC PROBLEMS.
!      SPRINGER SERIES IN COMPUTATIONAL MATHEMATICS,
!      SPRINGER-VERLAG (1990)         
!~~~~~~~~~~~~~~~~~~~~~~~~~~~~~~~~~~~~~~~~~~~~~~~~~~~~~~~~~~~~~~~~~~~~~~~~~~~~   

   IMPLICIT NONE
   
    rosMethod = RS4
!~~~> Name of the method
   ros_Name = 'ROS-4'   
!~~~> Number of stages
   ros_S = 4
   
!~~~> The coefficient matrices A and C are strictly lower triangular.
!   The lower triangular (subdiagonal) elements are stored in row-wise order:
!   A(2,1) = ros_A(1), A(3,1)=ros_A(2), A(3,2)=ros_A(3), etc.
!   The general mapping formula is:
!       A(i,j) = ros_A( (i-1)*(i-2)/2 + j )    
!       C(i,j) = ros_C( (i-1)*(i-2)/2 + j )  
     
   ros_A(1) = 0.2000000000000000d+01
   ros_A(2) = 0.1867943637803922d+01
   ros_A(3) = 0.2344449711399156d+00
   ros_A(4) = ros_A(2)
   ros_A(5) = ros_A(3)
   ros_A(6) = 0.0D0

   ros_C(1) =-0.7137615036412310d+01
   ros_C(2) = 0.2580708087951457d+01
   ros_C(3) = 0.6515950076447975d+00
   ros_C(4) =-0.2137148994382534d+01
   ros_C(5) =-0.3214669691237626d+00
   ros_C(6) =-0.6949742501781779d+00
!~~~> Does the stage i require a new function evaluation (ros_NewF(i)=TRUE)
!   or does it re-use the function evaluation from stage i-1 (ros_NewF(i)=FALSE)
   ros_NewF(1)  = .TRUE.
   ros_NewF(2)  = .TRUE.
   ros_NewF(3)  = .TRUE.
   ros_NewF(4)  = .FALSE.
!~~~> M_i = Coefficients for new step solution
   ros_M(1) = 0.2255570073418735d+01
   ros_M(2) = 0.2870493262186792d+00
   ros_M(3) = 0.4353179431840180d+00
   ros_M(4) = 0.1093502252409163d+01
!~~~> E_i  = Coefficients for error estimator    
   ros_E(1) =-0.2815431932141155d+00
   ros_E(2) =-0.7276199124938920d-01
   ros_E(3) =-0.1082196201495311d+00
   ros_E(4) =-0.1093502252409163d+01
!~~~> ros_ELO  = estimator of local order - the minimum between the
!    main and the embedded scheme orders plus 1
   ros_ELO  = 4.0d0    
!~~~> Y_stage_i ~ Y( T + H*Alpha_i )
   ros_Alpha(1) = 0.D0
   ros_Alpha(2) = 0.1145640000000000d+01
   ros_Alpha(3) = 0.6552168638155900d+00
   ros_Alpha(4) = ros_Alpha(3)
!~~~> Gamma_i = \sum_j  gamma_{i,j}    
   ros_Gamma(1) = 0.5728200000000000d+00
   ros_Gamma(2) =-0.1769193891319233d+01
   ros_Gamma(3) = 0.7592633437920482d+00
   ros_Gamma(4) =-0.1049021087100450d+00

  END SUBROUTINE Ros4
   
!~~~~~~~~~~~~~~~~~~~~~~~~~~~~~~~~~~~~~~~~~~~~~~~~~~~~~~~~~~~~~~~~~~~~~~~~~~~~   
  SUBROUTINE Rodas3
!~~~~~~~~~~~~~~~~~~~~~~~~~~~~~~~~~~~~~~~~~~~~~~~~~~~~~~~~~~~~~~~~~~~~~~~~~~~~   
! --- A STIFFLY-STABLE METHOD, 4 stages, order 3
!~~~~~~~~~~~~~~~~~~~~~~~~~~~~~~~~~~~~~~~~~~~~~~~~~~~~~~~~~~~~~~~~~~~~~~~~~~~~   

   IMPLICIT NONE
   
    rosMethod = RD3
!~~~> Name of the method
   ros_Name = 'RODAS-3'   
!~~~> Number of stages
   ros_S = 4
   
!~~~> The coefficient matrices A and C are strictly lower triangular.
!   The lower triangular (subdiagonal) elements are stored in row-wise order:
!   A(2,1) = ros_A(1), A(3,1)=ros_A(2), A(3,2)=ros_A(3), etc.
!   The general mapping formula is:
!       A(i,j) = ros_A( (i-1)*(i-2)/2 + j )    
!       C(i,j) = ros_C( (i-1)*(i-2)/2 + j )  
 
   ros_A(1) = 0.0d+00
   ros_A(2) = 2.0d+00
   ros_A(3) = 0.0d+00
   ros_A(4) = 2.0d+00
   ros_A(5) = 0.0d+00
   ros_A(6) = 1.0d+00

   ros_C(1) = 4.0d+00
   ros_C(2) = 1.0d+00
   ros_C(3) =-1.0d+00
   ros_C(4) = 1.0d+00
   ros_C(5) =-1.0d+00 
   ros_C(6) =-(8.0d+00/3.0d+00) 
         
!~~~> Does the stage i require a new function evaluation (ros_NewF(i)=TRUE)
!   or does it re-use the function evaluation from stage i-1 (ros_NewF(i)=FALSE)
   ros_NewF(1)  = .TRUE.
   ros_NewF(2)  = .FALSE.
   ros_NewF(3)  = .TRUE.
   ros_NewF(4)  = .TRUE.
!~~~> M_i = Coefficients for new step solution
   ros_M(1) = 2.0d+00
   ros_M(2) = 0.0d+00
   ros_M(3) = 1.0d+00
   ros_M(4) = 1.0d+00
!~~~> E_i  = Coefficients for error estimator    
   ros_E(1) = 0.0d+00
   ros_E(2) = 0.0d+00
   ros_E(3) = 0.0d+00
   ros_E(4) = 1.0d+00
!~~~> ros_ELO  = estimator of local order - the minimum between the
!    main and the embedded scheme orders plus 1
   ros_ELO  = 3.0d+00    
!~~~> Y_stage_i ~ Y( T + H*Alpha_i )
   ros_Alpha(1) = 0.0d+00
   ros_Alpha(2) = 0.0d+00
   ros_Alpha(3) = 1.0d+00
   ros_Alpha(4) = 1.0d+00
!~~~> Gamma_i = \sum_j  gamma_{i,j}    
   ros_Gamma(1) = 0.5d+00
   ros_Gamma(2) = 1.5d+00
   ros_Gamma(3) = 0.0d+00
   ros_Gamma(4) = 0.0d+00

  END SUBROUTINE Rodas3
    
!~~~~~~~~~~~~~~~~~~~~~~~~~~~~~~~~~~~~~~~~~~~~~~~~~~~~~~~~~~~~~~~~~~~~~~~~~~~~   
  SUBROUTINE Rodas4
!~~~~~~~~~~~~~~~~~~~~~~~~~~~~~~~~~~~~~~~~~~~~~~~~~~~~~~~~~~~~~~~~~~~~~~~~~~~~   
!     STIFFLY-STABLE ROSENBROCK METHOD OF ORDER 4, WITH 6 STAGES
!
!      E. HAIRER AND G. WANNER, SOLVING ORDINARY DIFFERENTIAL
!      EQUATIONS II. STIFF AND DIFFERENTIAL-ALGEBRAIC PROBLEMS.
!      SPRINGER SERIES IN COMPUTATIONAL MATHEMATICS,
!      SPRINGER-VERLAG (1996)         
!~~~~~~~~~~~~~~~~~~~~~~~~~~~~~~~~~~~~~~~~~~~~~~~~~~~~~~~~~~~~~~~~~~~~~~~~~~~~   

   IMPLICIT NONE

    rosMethod = RD4
!~~~> Name of the method
    ros_Name = 'RODAS-4'   
!~~~> Number of stages
    ros_S = 6

!~~~> Y_stage_i ~ Y( T + H*Alpha_i )
    ros_Alpha(1) = 0.000d0
    ros_Alpha(2) = 0.386d0
    ros_Alpha(3) = 0.210d0 
    ros_Alpha(4) = 0.630d0
    ros_Alpha(5) = 1.000d0
    ros_Alpha(6) = 1.000d0
        
!~~~> Gamma_i = \sum_j  gamma_{i,j}    
    ros_Gamma(1) = 0.2500000000000000d+00
    ros_Gamma(2) =-0.1043000000000000d+00
    ros_Gamma(3) = 0.1035000000000000d+00
    ros_Gamma(4) =-0.3620000000000023d-01
    ros_Gamma(5) = 0.0d0
    ros_Gamma(6) = 0.0d0

!~~~> The coefficient matrices A and C are strictly lower triangular.
!   The lower triangular (subdiagonal) elements are stored in row-wise order:
!   A(2,1) = ros_A(1), A(3,1)=ros_A(2), A(3,2)=ros_A(3), etc.
!   The general mapping formula is:  A(i,j) = ros_A( (i-1)*(i-2)/2 + j )    
!                  C(i,j) = ros_C( (i-1)*(i-2)/2 + j )  
     
    ros_A(1) = 0.1544000000000000d+01
    ros_A(2) = 0.9466785280815826d+00
    ros_A(3) = 0.2557011698983284d+00
    ros_A(4) = 0.3314825187068521d+01
    ros_A(5) = 0.2896124015972201d+01
    ros_A(6) = 0.9986419139977817d+00
    ros_A(7) = 0.1221224509226641d+01
    ros_A(8) = 0.6019134481288629d+01
    ros_A(9) = 0.1253708332932087d+02
    ros_A(10) =-0.6878860361058950d+00
    ros_A(11) = ros_A(7)
    ros_A(12) = ros_A(8)
    ros_A(13) = ros_A(9)
    ros_A(14) = ros_A(10)
    ros_A(15) = 1.0d+00

    ros_C(1) =-0.5668800000000000d+01
    ros_C(2) =-0.2430093356833875d+01
    ros_C(3) =-0.2063599157091915d+00
    ros_C(4) =-0.1073529058151375d+00
    ros_C(5) =-0.9594562251023355d+01
    ros_C(6) =-0.2047028614809616d+02
    ros_C(7) = 0.7496443313967647d+01
    ros_C(8) =-0.1024680431464352d+02
    ros_C(9) =-0.3399990352819905d+02
    ros_C(10) = 0.1170890893206160d+02
    ros_C(11) = 0.8083246795921522d+01
    ros_C(12) =-0.7981132988064893d+01
    ros_C(13) =-0.3152159432874371d+02
    ros_C(14) = 0.1631930543123136d+02
    ros_C(15) =-0.6058818238834054d+01

!~~~> M_i = Coefficients for new step solution
    ros_M(1) = ros_A(7)
    ros_M(2) = ros_A(8)
    ros_M(3) = ros_A(9)
    ros_M(4) = ros_A(10)
    ros_M(5) = 1.0d+00
    ros_M(6) = 1.0d+00

!~~~> E_i  = Coefficients for error estimator    
    ros_E(1) = 0.0d+00
    ros_E(2) = 0.0d+00
    ros_E(3) = 0.0d+00
    ros_E(4) = 0.0d+00
    ros_E(5) = 0.0d+00
    ros_E(6) = 1.0d+00

!~~~> Does the stage i require a new function evaluation (ros_NewF(i)=TRUE)
!   or does it re-use the function evaluation from stage i-1 (ros_NewF(i)=FALSE)
    ros_NewF(1) = .TRUE.
    ros_NewF(2) = .TRUE.
    ros_NewF(3) = .TRUE.
    ros_NewF(4) = .TRUE.
    ros_NewF(5) = .TRUE.
    ros_NewF(6) = .TRUE.
     
!~~~> ros_ELO  = estimator of local order - the minimum between the
!        main and the embedded scheme orders plus 1
    ros_ELO = 4.0d0
     
  END SUBROUTINE Rodas4


END SUBROUTINE RosenbrockADJ ! and its internal procedures
  

!~~~~~~~~~~~~~~~~~~~~~~~~~~~~~~~~~~~~~~~~~~~~~~~~~~~~~~~~~~~~~~~~~~~~~~~~~~~~   
SUBROUTINE FunTemplate( T, Y, Ydot )
!~~~~~~~~~~~~~~~~~~~~~~~~~~~~~~~~~~~~~~~~~~~~~~~~~~~~~~~~~~~~~~~~~~~~~~~~~~~~  
!  Template for the ODE function call.
!  Updates the rate coefficients (and possibly the fixed species) at each call    
!~~~~~~~~~~~~~~~~~~~~~~~~~~~~~~~~~~~~~~~~~~~~~~~~~~~~~~~~~~~~~~~~~~~~~~~~~~~~   
 
!~~~> Input variables     
   KPP_REAL, INTENT(IN)  :: T, Y(NVAR)
!~~~> Output variables     
   KPP_REAL, INTENT(OUT) :: Ydot(NVAR)
!~~~> Local variables
   KPP_REAL :: Told     

   Told = TIME
   TIME = T
   CALL Update_SUN()
   CALL Update_RCONST()
   CALL Fun( Y, FIX, RCONST, Ydot )
   TIME = Told
   
END SUBROUTINE FunTemplate


!~~~~~~~~~~~~~~~~~~~~~~~~~~~~~~~~~~~~~~~~~~~~~~~~~~~~~~~~~~~~~~~~~~~~~~~~~~~~
SUBROUTINE JacTemplate( T, Y, Jcb )
!~~~~~~~~~~~~~~~~~~~~~~~~~~~~~~~~~~~~~~~~~~~~~~~~~~~~~~~~~~~~~~~~~~~~~~~~~~~~
!  Template for the ODE Jacobian call.
!  Updates the rate coefficients (and possibly the fixed species) at each call
!~~~~~~~~~~~~~~~~~~~~~~~~~~~~~~~~~~~~~~~~~~~~~~~~~~~~~~~~~~~~~~~~~~~~~~~~~~~~

!~~~> Input variables
    KPP_REAL :: T, Y(NVAR)
!~~~> Output variables
#ifdef FULL_ALGEBRA    
    KPP_REAL :: JV(LU_NONZERO), Jcb(NVAR,NVAR)
#else
    KPP_REAL :: Jcb(LU_NONZERO)
#endif   
!~~~> Local variables
    KPP_REAL :: Told
#ifdef FULL_ALGEBRA    
    INTEGER :: i, j
#endif   

    Told = TIME
    TIME = T
    CALL Update_SUN()
    CALL Update_RCONST()
#ifdef FULL_ALGEBRA    
    CALL Jac_SP(Y, FIX, RCONST, JV)
    DO j=1,NVAR
      DO i=1,NVAR
         Jcb(i,j) = 0.0_dp
      END DO
    END DO
    DO i=1,LU_NONZERO
       Jcb(LU_IROW(i),LU_ICOL(i)) = JV(i)
    END DO
#else
    CALL Jac_SP( Y, FIX, RCONST, Jcb )
#endif   
    TIME = Told

END SUBROUTINE JacTemplate


!~~~~~~~~~~~~~~~~~~~~~~~~~~~~~~~~~~~~~~~~~~~~~~~~~~~~~~~~~~~~~~~~~~~~~~~~~~~~   
SUBROUTINE HessTemplate( T, Y, Hes )
!~~~~~~~~~~~~~~~~~~~~~~~~~~~~~~~~~~~~~~~~~~~~~~~~~~~~~~~~~~~~~~~~~~~~~~~~~~~~   
!  Template for the ODE Hessian call.
!  Updates the rate coefficients (and possibly the fixed species) at each call    
!~~~~~~~~~~~~~~~~~~~~~~~~~~~~~~~~~~~~~~~~~~~~~~~~~~~~~~~~~~~~~~~~~~~~~~~~~~~~   

!~~~> Input variables     
    KPP_REAL, INTENT(IN)  :: T, Y(NVAR)
!~~~> Output variables     
    KPP_REAL, INTENT(OUT) :: Hes(NHESS)
!~~~> Local variables
    KPP_REAL :: Told     

    Told = TIME
    TIME = T   
    CALL Update_SUN()
    CALL Update_RCONST()
    CALL Hessian( Y, FIX, RCONST, Hes )
    TIME = Told

END SUBROUTINE HessTemplate                                      

END MODULE KPP_ROOT_Integrator
