# Supplementary material for: The atmospheric chemistry box model CAABA/MECCA-3.0
Source: Copernicus journal article supplement (doi:10.5194/gmd-4-373-2011), 2011-05-06
Supplement: Supplementary file 9 [file gmd-4-373-2011-supplement.zip › caaba_3.0/mecca/kpp/int/rosenbrock_mz.f90]

MODULE KPP_ROOT_Integrator

  IMPLICIT NONE
  PUBLIC
  SAVE
!~~~>  Statistics on the work performed by the Rosenbrock method
  INTEGER :: Nfun,Njac,Nstp,Nacc,Nrej,Ndec,Nsol,Nsng
  INTEGER, PARAMETER :: ifun=1, ijac=2, istp=3, iacc=4, &
    irej=5, idec=6, isol=7, isng=8, itexit=1, ihexit=2
    

  ! description of the error numbers IERR
  CHARACTER(LEN=50), PARAMETER, DIMENSION(-8:1) :: IERR_NAMES = (/ &
    'Matrix is repeatedly singular                     ', & ! -8
    'Step size too small                               ', & ! -7
    'No of steps exceeds maximum bound                 ', & ! -6
    'Improper tolerance values                         ', & ! -5
    'FacMin/FacMax/FacRej must be positive             ', & ! -4
    'Hmin/Hmax/Hstart must be positive                 ', & ! -3
    'Selected Rosenbrock method not implemented        ', & ! -2
    'Improper value for maximal no of steps            ', & ! -1
    '                                                  ', & !  0 (not used)
    'Success                                           ' /) !  1

CONTAINS

SUBROUTINE INTEGRATE( TIN, TOUT, &
  ICNTRL_U, RCNTRL_U, ISTATUS_U, RSTATUS_U, IERR_U )

   USE KPP_ROOT_Parameters
   USE KPP_ROOT_Global
   IMPLICIT NONE

   KPP_REAL, INTENT(IN) :: TIN  ! Start Time
   KPP_REAL, INTENT(IN) :: TOUT ! End Time
   ! Optional input parameters and statistics
   INTEGER,  INTENT(IN),  OPTIONAL :: ICNTRL_U(20)
   KPP_REAL, INTENT(IN),  OPTIONAL :: RCNTRL_U(20)
   INTEGER,  INTENT(OUT), OPTIONAL :: ISTATUS_U(20)
   KPP_REAL, INTENT(OUT), OPTIONAL :: RSTATUS_U(20)
   INTEGER,  INTENT(OUT), OPTIONAL :: IERR_U

   INTEGER :: N_stp, N_acc, N_rej, N_sng
   SAVE N_stp, N_acc, N_rej, N_sng
   INTEGER :: i, IERR
   KPP_REAL :: RCNTRL(20), RSTATUS(20)
   INTEGER :: ICNTRL(20), ISTATUS(20)

   ICNTRL(:)  = 0
   RCNTRL(:)  = 0.0_dp
   ISTATUS(:) = 0
   RSTATUS(:) = 0.0_dp

   ! If optional parameters are given, and if they are >0, 
   ! then they overwrite default settings. 
   IF (PRESENT(ICNTRL_U)) THEN
     WHERE(ICNTRL_U(:) > 0) ICNTRL(:) = ICNTRL_U(:)
   END IF
   IF (PRESENT(RCNTRL_U)) THEN
     WHERE(RCNTRL_U(:) > 0) RCNTRL(:) = RCNTRL_U(:)
   END IF

   CALL Rosenbrock(VAR,TIN,TOUT,   &
         ATOL,RTOL,                &
         RCNTRL,ICNTRL,RSTATUS,ISTATUS,IERR)

   STEPMIN = RCNTRL(ihexit)
   ! if optional parameters are given for output they to return information
   IF (PRESENT(ISTATUS_U)) ISTATUS_U(:) = ISTATUS(:)
   IF (PRESENT(RSTATUS_U)) RSTATUS_U(:) = RSTATUS(:)
   IF (PRESENT(IERR_U))    IERR_U       = IERR

END SUBROUTINE INTEGRATE

!~~~~~~~~~~~~~~~~~~~~~~~~~~~~~~~~~~~~~~~~~~~~~~~~~~~~~~~~~~~~~~~~~~~~~~
SUBROUTINE Rosenbrock(Y,Tstart,Tend, &
           AbsTol,RelTol,            &
           RCNTRL,ICNTRL,RSTATUS,ISTATUS,IERR)
!~~~~~~~~~~~~~~~~~~~~~~~~~~~~~~~~~~~~~~~~~~~~~~~~~~~~~~~~~~~~~~~~~~~~~~
!
!    Solves the system y'=F(t,y) using a Rosenbrock method defined by:
!
!     G = 1/(H*gamma(1)) - Jac(t0,Y0)
!     T_i = t0 + Alpha(i)*H
!     Y_i = Y0 + \sum_{j=1}^{i-1} A(i,j)*K_j
!     G * K_i = Fun( T_i, Y_i ) + \sum_{j=1}^S C(i,j)/H * K_j +
!         gamma(i)*dF/dT(t0, Y0)
!     Y1 = Y0 + \sum_{j=1}^S M(j)*K_j
!
!    For details on Rosenbrock methods and their implementation consult:
!      E. Hairer and G. Wanner
!      "Solving ODEs II. Stiff and differential-algebraic problems".
!      Springer series in computational mathematics, Springer-Verlag, 1996.
!    The codes contained in the book inspired this implementation.
!
!    (C)  Adrian Sandu, August 2004
!    Virginia Polytechnic Institute and State University
!    Contact: sandu@cs.vt.edu
!    This implementation is part of KPP - the Kinetic PreProcessor
!~~~~~~~~~~~~~~~~~~~~~~~~~~~~~~~~~~~~~~~~~~~~~~~~~~~~~~~~~~~~~~~~~~~~~~
!
!~~~>   INPUT ARGUMENTS:
!
!-     Y(NVAR)    = vector of initial conditions (at T=Tstart)
!-    [Tstart,Tend]  = time range of integration
!     (if Tstart>Tend the integration is performed backwards in time)
!-    RelTol, AbsTol = user precribed accuracy
!- SUBROUTINE  Fun( T, Y, Ydot ) = ODE function,
!                       returns Ydot = Y' = F(T,Y)
!- SUBROUTINE  Jac( T, Y, Jcb ) = Jacobian of the ODE function,
!                       returns Jcb = dFun/dY
!-    ICNTRL(1:20)    = integer inputs parameters
!-    RCNTRL(1:20)    = real inputs parameters
!~~~~~~~~~~~~~~~~~~~~~~~~~~~~~~~~~~~~~~~~~~~~~~~~~~~~~~~~~~~~~~~~~~~~~~
!
!~~~>     OUTPUT ARGUMENTS:
!
!-    Y(NVAR)    -> vector of final states (at T->Tend)
!-    ISTATUS(1:20)   -> integer output parameters
!-    RSTATUS(1:20)   -> real output parameters
!-    IERR            -> job status upon return
!                        success (positive value) or
!                        failure (negative value)
!~~~~~~~~~~~~~~~~~~~~~~~~~~~~~~~~~~~~~~~~~~~~~~~~~~~~~~~~~~~~~~~~~~~~~~
!
!~~~>     INPUT PARAMETERS:
!
!    Note: For input parameters equal to zero the default values of the
!       corresponding variables are used.
!
!    ICNTRL(1) = 1: F = F(y)   Independent of T (AUTONOMOUS)
!              = 0: F = F(t,y) Depends on T (NON-AUTONOMOUS)
!
!    ICNTRL(2) = 0: AbsTol, RelTol are NVAR-dimensional vectors
!              = 1: AbsTol, RelTol are scalars
!
!    ICNTRL(3)  -> selection of a particular Rosenbrock method
!        = 0 :  default method is Rodas3
!        = 1 :  method is  Ros2
!        = 2 :  method is  Ros3
!        = 3 :  method is  Ros4
!        = 4 :  method is  Rodas3
!        = 5:   method is  Rodas4
!
!    ICNTRL(4)  -> maximum number of integration steps
!        For ICNTRL(4)=0) the default value of 100000 is used
!
!    RCNTRL(1)  -> Hmin, lower bound for the integration step size
!          It is strongly recommended to keep Hmin = ZERO
!    RCNTRL(2)  -> Hmax, upper bound for the integration step size
!    RCNTRL(3)  -> Hstart, starting value for the integration step size
!
!    RCNTRL(4)  -> FacMin, lower bound on step decrease factor (default=0.2)
!    RCNTRL(5)  -> FacMax, upper bound on step increase factor (default=6)
!    RCNTRL(6)  -> FacRej, step decrease factor after multiple rejections
!            (default=0.1)
!    RCNTRL(7)  -> FacSafe, by which the new step is slightly smaller
!         than the predicted value  (default=0.9)
!~~~~~~~~~~~~~~~~~~~~~~~~~~~~~~~~~~~~~~~~~~~~~~~~~~~~~~~~~~~~~~~~~~~~~~
!
!~~~>     OUTPUT PARAMETERS:
!
!    Note: each call to Rosenbrock adds the current no. of fcn calls
!      to previous value of ISTATUS(1), and similar for the other params.
!      Set ISTATUS(1:20) = 0 before call to avoid this accumulation.
!
!    ISTATUS(1) = No. of function calls
!    ISTATUS(2) = No. of jacobian calls
!    ISTATUS(3) = No. of steps
!    ISTATUS(4) = No. of accepted steps
!    ISTATUS(5) = No. of rejected steps (except at the beginning)
!    ISTATUS(6) = No. of LU decompositions
!    ISTATUS(7) = No. of forward/backward substitutions
!    ISTATUS(8) = No. of singular matrix decompositions
!
!    RSTATUS(1)  -> Texit, the time corresponding to the
!                   computed Y upon return
!    RSTATUS(2)  -> Hexit, last accepted step before exit
!    For multiple restarts, use Hexit as Hstart in the following run
!~~~~~~~~~~~~~~~~~~~~~~~~~~~~~~~~~~~~~~~~~~~~~~~~~~~~~~~~~~~~~~~~~~~~~~

  USE KPP_ROOT_Parameters
  USE KPP_ROOT_LinearAlgebra
  IMPLICIT NONE

!~~~>  Arguments
   KPP_REAL, INTENT(INOUT) :: Y(NVAR)
   KPP_REAL, INTENT(IN)   :: Tstart,Tend
   KPP_REAL, INTENT(IN)   :: AbsTol(NVAR),RelTol(NVAR)
   INTEGER, INTENT(IN)    :: ICNTRL(20)
   KPP_REAL, INTENT(IN)   :: RCNTRL(20)
   INTEGER, INTENT(INOUT) :: ISTATUS(20)
   KPP_REAL, INTENT(INOUT) :: RSTATUS(20)
   INTEGER, INTENT(OUT)   :: IERR
!~~~>  The method parameters
   INTEGER, PARAMETER :: Smax = 6
   INTEGER  :: Method, ros_S
   KPP_REAL, DIMENSION(Smax) :: ros_M, ros_E, ros_Alpha, ros_Gamma
   KPP_REAL, DIMENSION(Smax*(Smax-1)/2) :: ros_A, ros_C
   KPP_REAL :: ros_ELO
   LOGICAL, DIMENSION(Smax) :: ros_NewF
   CHARACTER(LEN=12) :: ros_Name
!~~~>  Local variables
   KPP_REAL :: Roundoff, FacMin, FacMax, FacRej, FacSafe
   KPP_REAL :: Hmin, Hmax, Hstart, Hexit
   KPP_REAL :: Texit
   INTEGER :: i, UplimTol, Max_no_steps
   LOGICAL :: Autonomous, VectorTol
!~~~>   Parameters
   KPP_REAL, PARAMETER :: ZERO = 0.0_dp, ONE  = 1.0_dp
   KPP_REAL, PARAMETER :: DeltaMin = 1.0E-5_dp

!~~~>  Initialize statistics
   Nfun = ISTATUS(ifun)
   Njac = ISTATUS(ijac)
   Nstp = ISTATUS(istp)
   Nacc = ISTATUS(iacc)
   Nrej = ISTATUS(irej)
   Ndec = ISTATUS(idec)
   Nsol = ISTATUS(isol)
   Nsng = ISTATUS(isng)

!~~~>  Autonomous or time dependent ODE. Default is time dependent.
   Autonomous = .NOT.(ICNTRL(1) == 0)

!~~~>  For Scalar tolerances (ICNTRL(2).NE.0)  the code uses AbsTol(1) and RelTol(1)
!   For Vector tolerances (ICNTRL(2) == 0) the code uses AbsTol(1:NVAR) and RelTol(1:NVAR)
   IF (ICNTRL(2) == 0) THEN
      VectorTol = .TRUE.
         UplimTol  = NVAR
   ELSE
      VectorTol = .FALSE.
         UplimTol  = 1
   END IF

!~~~>  The particular Rosenbrock method chosen
   IF (ICNTRL(3) == 0) THEN
      Method = 4
   ELSEIF ( (ICNTRL(3) >= 1).AND.(ICNTRL(3) <= 5) ) THEN
      Method = ICNTRL(3)
   ELSE
      PRINT * , 'User-selected Rosenbrock method: ICNTRL(3)=', Method
      CALL ros_ErrorMsg(-2,Tstart,ZERO,IERR)
      RETURN
   END IF

!~~~>   The maximum number of steps admitted
   IF (ICNTRL(4) == 0) THEN
      Max_no_steps = 100000
   ELSEIF (ICNTRL(4) > 0) THEN
      Max_no_steps=ICNTRL(4)
   ELSE
      PRINT * ,'User-selected max no. of steps: ICNTRL(4)=',ICNTRL(4)
      CALL ros_ErrorMsg(-1,Tstart,ZERO,IERR)
      RETURN
   END IF

!~~~>  Unit roundoff (1+Roundoff>1)
   Roundoff = WLAMCH('E')

!~~~>  Lower bound on the step size: (positive value)
   IF (RCNTRL(1) == ZERO) THEN
      Hmin = ZERO
   ELSEIF (RCNTRL(1) > ZERO) THEN
      Hmin = RCNTRL(1)
   ELSE
      PRINT * , 'User-selected Hmin: RCNTRL(1)=', RCNTRL(1)
      CALL ros_ErrorMsg(-3,Tstart,ZERO,IERR)
      RETURN
   END IF
!~~~>  Upper bound on the step size: (positive value)
   IF (RCNTRL(2) == ZERO) THEN
      Hmax = ABS(Tend-Tstart)
   ELSEIF (RCNTRL(2) > ZERO) THEN
      Hmax = MIN(ABS(RCNTRL(2)),ABS(Tend-Tstart))
   ELSE
      PRINT * , 'User-selected Hmax: RCNTRL(2)=', RCNTRL(2)
      CALL ros_ErrorMsg(-3,Tstart,ZERO,IERR)
      RETURN
   END IF
!~~~>  Starting step size: (positive value)
   IF (RCNTRL(3) == ZERO) THEN
      Hstart = MAX(Hmin,DeltaMin)
   ELSEIF (RCNTRL(3) > ZERO) THEN
      Hstart = MIN(ABS(RCNTRL(3)),ABS(Tend-Tstart))
   ELSE
      PRINT * , 'User-selected Hstart: RCNTRL(3)=', RCNTRL(3)
      CALL ros_ErrorMsg(-3,Tstart,ZERO,IERR)
      RETURN
   END IF
!~~~>  Step size can be changed s.t.  FacMin < Hnew/Hexit < FacMax
   IF (RCNTRL(4) == ZERO) THEN
      FacMin = 0.2_dp
   ELSEIF (RCNTRL(4) > ZERO) THEN
      FacMin = RCNTRL(4)
   ELSE
      PRINT * , 'User-selected FacMin: RCNTRL(4)=', RCNTRL(4)
      CALL ros_ErrorMsg(-4,Tstart,ZERO,IERR)
      RETURN
   END IF
   IF (RCNTRL(5) == ZERO) THEN
      FacMax = 6.0_dp
   ELSEIF (RCNTRL(5) > ZERO) THEN
      FacMax = RCNTRL(5)
   ELSE
      PRINT * , 'User-selected FacMax: RCNTRL(5)=', RCNTRL(5)
      CALL ros_ErrorMsg(-4,Tstart,ZERO,IERR)
      RETURN
   END IF
!~~~>   FacRej: Factor to decrease step after 2 succesive rejections
   IF (RCNTRL(6) == ZERO) THEN
      FacRej = 0.1_dp
   ELSEIF (RCNTRL(6) > ZERO) THEN
      FacRej = RCNTRL(6)
   ELSE
      PRINT * , 'User-selected FacRej: RCNTRL(6)=', RCNTRL(6)
      CALL ros_ErrorMsg(-4,Tstart,ZERO,IERR)
      RETURN
   END IF
!~~~>   FacSafe: Safety Factor in the computation of new step size
   IF (RCNTRL(7) == ZERO) THEN
      FacSafe = 0.9_dp
   ELSEIF (RCNTRL(7) > ZERO) THEN
      FacSafe = RCNTRL(7)
   ELSE
      PRINT * , 'User-selected FacSafe: RCNTRL(7)=', RCNTRL(7)
      CALL ros_ErrorMsg(-4,Tstart,ZERO,IERR)
      RETURN
   END IF
!~~~>  Check if tolerances are reasonable
    DO i=1,UplimTol
      IF ( (AbsTol(i) <= ZERO) .OR. (RelTol(i) <= 10.0_dp*Roundoff) &
         .OR. (RelTol(i) >= 1.0_dp) ) THEN
        PRINT * , ' AbsTol(',i,') = ',AbsTol(i)
        PRINT * , ' RelTol(',i,') = ',RelTol(i)
        CALL ros_ErrorMsg(-5,Tstart,ZERO,IERR)
        RETURN
      END IF
    END DO


!~~~>   Initialize the particular Rosenbrock method
   SELECT CASE (Method)
     CASE (1)
       CALL Ros2(ros_S, ros_A, ros_C, ros_M, ros_E,   &
          ros_Alpha, ros_Gamma, ros_NewF, ros_ELO, ros_Name)
     CASE (2)
       CALL Ros3(ros_S, ros_A, ros_C, ros_M, ros_E,   &
          ros_Alpha, ros_Gamma, ros_NewF, ros_ELO, ros_Name)
     CASE (3)
       CALL Ros4(ros_S, ros_A, ros_C, ros_M, ros_E,   &
          ros_Alpha, ros_Gamma, ros_NewF, ros_ELO, ros_Name)
     CASE (4)
       CALL Rodas3(ros_S, ros_A, ros_C, ros_M, ros_E, &
          ros_Alpha, ros_Gamma, ros_NewF, ros_ELO, ros_Name)
     CASE (5)
       CALL Rodas4(ros_S, ros_A, ros_C, ros_M, ros_E, &
          ros_Alpha, ros_Gamma, ros_NewF, ros_ELO, ros_Name)
     CASE DEFAULT
       PRINT * , 'Unknown Rosenbrock method: ICNTRL(3)=', Method
       CALL ros_ErrorMsg(-2,Tstart,ZERO,IERR)
       RETURN
   END SELECT

!~~~>  CALL Rosenbrock method
   CALL ros_Integrator(Y,Tstart,Tend,Texit,      &
        AbsTol, RelTol,                          &
!  Rosenbrock method coefficients
        ros_S, ros_M, ros_E, ros_A, ros_C,       &
        ros_Alpha, ros_Gamma, ros_ELO, ros_NewF, &
!  Integration parameters
        Autonomous, VectorTol, Max_no_steps,     &
        Roundoff, Hmin, Hmax, Hstart, Hexit,     &
        FacMin, FacMax, FacRej, FacSafe,         &
!  Error indicator
        IERR)


!~~~>  Collect run statistics
   ISTATUS(ifun) = Nfun
   ISTATUS(ijac) = Njac
   ISTATUS(istp) = Nstp
   ISTATUS(iacc) = Nacc
   ISTATUS(irej) = Nrej
   ISTATUS(idec) = Ndec
   ISTATUS(isol) = Nsol
   ISTATUS(isng) = Nsng
!~~~> Last T and H
   RSTATUS(itexit) = Texit
   RSTATUS(ihexit) = Hexit

!~~~~~~~~~~~~~~~~~~~~~~~~~~~~~~~~~~~~~~~~~~~~~~~~~~~~~~~~~~~~~~~~~~~~~~~~~~~~
CONTAINS !  SUBROUTINES internal to Rosenbrock
!~~~~~~~~~~~~~~~~~~~~~~~~~~~~~~~~~~~~~~~~~~~~~~~~~~~~~~~~~~~~~~~~~~~~~~~~~~~~

!~~~~~~~~~~~~~~~~~~~~~~~~~~~~~~~~~~~~~~~~~~~~~~~~~~~~~~~~~~~~~~~~~~~~~~~~~~~~~~~~~~~~~~~~~~~~~
 SUBROUTINE ros_ErrorMsg(Code,T,H,IERR)
!~~~~~~~~~~~~~~~~~~~~~~~~~~~~~~~~~~~~~~~~~~~~~~~~~~~~~~~~~~~~~~~~~~~~~~~~~~~~~~~~~~~~~~~~~~~~~
!    Handles all error messages
!~~~~~~~~~~~~~~~~~~~~~~~~~~~~~~~~~~~~~~~~~~~~~~~~~~~~~~~~~~~~~~~~~~~~~~~~~~~~~~~~~~~~~~~~~~~~~

   KPP_REAL, INTENT(IN) :: T, H
   INTEGER, INTENT(IN)  :: Code
   INTEGER, INTENT(OUT) :: IERR

   IERR = Code
   PRINT * , &
     'Forced exit from Rosenbrock due to the following error:'
   IF ((Code>=-8).AND.(Code<=-1)) THEN
     PRINT *, IERR_NAMES(Code)
   ELSE
     PRINT *, 'Unknown Error code: ', Code
   ENDIF

   PRINT *, "T=", T, "and H=", H

 END SUBROUTINE ros_ErrorMsg

!~~~~~~~~~~~~~~~~~~~~~~~~~~~~~~~~~~~~~~~~~~~~~~~~~~~~~~~~~~~~~~~~~~~~~~~~~~~~
 SUBROUTINE ros_Integrator (Y, Tstart, Tend, T,     &
        AbsTol, RelTol,                          &
!~~~> Rosenbrock method coefficients
        ros_S, ros_M, ros_E, ros_A, ros_C,       &
        ros_Alpha, ros_Gamma, ros_ELO, ros_NewF, &
!~~~> Integration parameters
        Autonomous, VectorTol, Max_no_steps,     &
        Roundoff, Hmin, Hmax, Hstart, Hexit,     &
        FacMin, FacMax, FacRej, FacSafe,         &
!~~~> Error indicator
        IERR )
!~~~~~~~~~~~~~~~~~~~~~~~~~~~~~~~~~~~~~~~~~~~~~~~~~~~~~~~~~~~~~~~~~~~~~~~~~~~~
!   Template for the implementation of a generic Rosenbrock method
!      defined by ros_S (no of stages)
!      and its coefficients ros_{A,C,M,E,Alpha,Gamma}
!~~~~~~~~~~~~~~~~~~~~~~~~~~~~~~~~~~~~~~~~~~~~~~~~~~~~~~~~~~~~~~~~~~~~~~~~~~~~

  IMPLICIT NONE

!~~~> Input: the initial condition at Tstart; Output: the solution at T
   KPP_REAL, INTENT(INOUT) :: Y(NVAR)
!~~~> Input: integration interval
   KPP_REAL, INTENT(IN) :: Tstart,Tend
!~~~> Output: time at which the solution is returned (T=Tend if success)
   KPP_REAL, INTENT(OUT) ::  T
!~~~> Input: tolerances
   KPP_REAL, INTENT(IN) ::  AbsTol(NVAR), RelTol(NVAR)
!~~~> Input: The Rosenbrock method parameters
   INTEGER, INTENT(IN) ::  ros_S
   KPP_REAL, INTENT(IN) :: ros_M(ros_S), ros_E(ros_S),  &
       ros_Alpha(ros_S), ros_A(ros_S*(ros_S-1)/2), &
       ros_Gamma(ros_S), ros_C(ros_S*(ros_S-1)/2), ros_ELO
   LOGICAL, INTENT(IN) :: ros_NewF(ros_S)
!~~~> Input: integration parameters
   LOGICAL, INTENT(IN) :: Autonomous, VectorTol
   KPP_REAL, INTENT(IN) :: Hstart, Hmin, Hmax
   INTEGER, INTENT(IN) :: Max_no_steps
   KPP_REAL, INTENT(IN) :: Roundoff, FacMin, FacMax, FacRej, FacSafe
!~~~> Output: last accepted step
   KPP_REAL, INTENT(OUT) :: Hexit
!~~~> Output: Error indicator
   INTEGER, INTENT(OUT) :: IERR
! ~~~~ Local variables
   KPP_REAL :: Ynew(NVAR), Fcn0(NVAR), Fcn(NVAR)
   KPP_REAL :: K(NVAR*ros_S), dFdT(NVAR)
#ifdef FULL_ALGEBRA    
   KPP_REAL :: Jac0(NVAR,NVAR), Ghimj(NVAR,NVAR)
#else
   KPP_REAL :: Jac0(LU_NONZERO), Ghimj(LU_NONZERO)
#endif
   KPP_REAL :: H, Hnew, HC, HG, Fac, Tau
   KPP_REAL :: Err, Yerr(NVAR)
   INTEGER :: Pivot(NVAR), Direction, ioffset, j, istage
   LOGICAL :: RejectLastH, RejectMoreH, Singular
!~~~>  Local parameters
   KPP_REAL, PARAMETER :: ZERO = 0.0_dp, ONE  = 1.0_dp
   KPP_REAL, PARAMETER :: DeltaMin = 1.0E-5_dp
!~~~>  Locally called functions
!    KPP_REAL WLAMCH
!    EXTERNAL WLAMCH
!~~~~~~~~~~~~~~~~~~~~~~~~~~~~~~~~~~~~~~~~~~~~~~~~~~~~~~~~~~~~~~~~~~~~~~~~~~~~


!~~~>  Initial preparations
   T = Tstart
   Hexit = 0.0_dp
   H = MIN(Hstart,Hmax)
   IF (ABS(H) <= 10.0_dp*Roundoff) H = DeltaMin

   IF (Tend  >=  Tstart) THEN
     Direction = +1
   ELSE
     Direction = -1
   END IF

   RejectLastH=.FALSE.
   RejectMoreH=.FALSE.

!~~~> Time loop begins below

TimeLoop: DO WHILE ( (Direction > 0).AND.((T-Tend)+Roundoff <= ZERO) &
       .OR. (Direction < 0).AND.((Tend-T)+Roundoff <= ZERO) )

   IF ( Nstp > Max_no_steps ) THEN  ! Too many steps
      CALL ros_ErrorMsg(-6,T,H,IERR)
      RETURN
   END IF
   IF ( ((T+0.1_dp*H) == T).OR.(H <= Roundoff) ) THEN  ! Step size too small
      CALL ros_ErrorMsg(-7,T,H,IERR)
      RETURN
   END IF

!~~~>  Limit H if necessary to avoid going beyond Tend
   Hexit = H
   H = MIN(H,ABS(Tend-T))

!~~~>   Compute the function at current time
   CALL FunTemplate(T,Y,Fcn0)

!~~~>  Compute the function derivative with respect to T
   IF (.NOT.Autonomous) THEN
      CALL ros_FunTimeDerivative ( T, Roundoff, Y, &
                Fcn0, dFdT )
   END IF

!~~~>   Compute the Jacobian at current time
   CALL JacTemplate(T,Y,Jac0)

!~~~>  Repeat step calculation until current step accepted
UntilAccepted: DO

   CALL ros_PrepareMatrix(H,Direction,ros_Gamma(1), &
          Jac0,Ghimj,Pivot,Singular)
   IF (Singular) THEN ! More than 5 consecutive failed decompositions
       CALL ros_ErrorMsg(-8,T,H,IERR)
       RETURN
   END IF

!~~~>   Compute the stages
Stage: DO istage = 1, ros_S

      ! Current istage offset. Current istage vector is K(ioffset+1:ioffset+NVAR)
       ioffset = NVAR*(istage-1)

      ! For the 1st istage the function has been computed previously
       IF ( istage == 1 ) THEN
!         CALL WCOPY(NVAR,Fcn0,1,Fcn,1)
         Fcn(1:NVAR) = Fcn0(1:NVAR) 
      ! istage>1 and a new function evaluation is needed at the current istage
       ELSEIF ( ros_NewF(istage) ) THEN
!         CALL WCOPY(NVAR,Y,1,Ynew,1)
         Ynew(1:NVAR) = Y(1:NVAR)
         DO j = 1, istage-1
!           CALL WAXPY(NVAR,ros_A((istage-1)*(istage-2)/2+j), &
!            K(NVAR*(j-1)+1),1,Ynew,1)
           Ynew(1:NVAR) = Ynew(1:NVAR) + K(NVAR*(j-1)+1:NVAR*j) &
                        * ros_A((istage-1)*(istage-2)/2+j)
         END DO
         Tau = T + ros_Alpha(istage)*Direction*H
         CALL FunTemplate(Tau,Ynew,Fcn)
       END IF ! if istage == 1 elseif ros_NewF(istage)
!       CALL WCOPY(NVAR,Fcn,1,K(ioffset+1),1)
       K(ioffset+1:ioffset+NVAR) = Fcn(1:NVAR)
       DO j = 1, istage-1
         HC = ros_C((istage-1)*(istage-2)/2+j)/(Direction*H)
!         CALL WAXPY(NVAR,HC,K(NVAR*(j-1)+1),1,K(ioffset+1),1)
         K(ioffset+1:ioffset+NVAR) = K(ioffset+1:ioffset+NVAR) + &
           K(NVAR*(j-1)+1:NVAR*j) * HC
       END DO
       IF ((.NOT. Autonomous).AND.(ros_Gamma(istage).NE.ZERO)) THEN
         HG = Direction*H*ros_Gamma(istage)
!         CALL WAXPY(NVAR,HG,dFdT,1,K(ioffset+1),1)
         K(ioffset+1:ioffset+NVAR) = K(ioffset+1:ioffset+NVAR) + &
           dFdT(1:NVAR) * HG
       END IF
       CALL ros_Solve(Ghimj, Pivot, K(ioffset+1))

   END DO Stage


!~~~>  Compute the new solution
!   CALL WCOPY(NVAR,Y,1,Ynew,1)
   YNEW(1:NVAR) = Y(1:NVAR)
   DO j=1,ros_S
!         CALL WAXPY(NVAR,ros_M(j),K(NVAR*(j-1)+1),1,Ynew,1)
         Ynew(1:NVAR) = Ynew(1:NVAR) + &
                        K(NVAR*(j-1)+1:NVAR*j) * ros_m(j)
   END DO

!~~~>  Compute the error estimation
!   CALL WSCAL(NVAR,ZERO,Yerr,1)
   Yerr(1:NVAR) = ZERO
   DO j=1,ros_S
!     CALL WAXPY(NVAR,ros_E(j),K(NVAR*(j-1)+1),1,Yerr,1)
     Yerr(1:NVAR) = Yerr(1:NVAR) + &
                    K(NVAR*(j-1)+1:NVAR*j) * ros_E(j)
   END DO
   Err = ros_ErrorNorm ( Y, Ynew, Yerr, AbsTol, RelTol, VectorTol )

!~~~> New step size is bounded by FacMin <= Hnew/H <= FacMax
   Fac  = MIN(FacMax,MAX(FacMin,FacSafe/Err**(ONE/ros_ELO)))
   Hnew = H*Fac

!~~~>  Check the error magnitude and adjust step size
   Nstp = Nstp+1
   IF ( (Err <= ONE).OR.(H <= Hmin) ) THEN  !~~~> Accept step
      Nacc = Nacc+1
!      CALL WCOPY(NVAR,Ynew,1,Y,1)
      Y(1:NVAR) = MAX(Ynew(1:NVAR),ZERO)
      T = T + Direction*H
      Hnew = MAX(Hmin,MIN(Hnew,Hmax))
      IF (RejectLastH) THEN  ! No step size increase after a rejected step
         Hnew = MIN(Hnew,H)
      END IF
      RejectLastH = .FALSE.
      RejectMoreH = .FALSE.
      H = Hnew
      EXIT UntilAccepted ! EXIT THE LOOP: WHILE STEP NOT ACCEPTED
   ELSE           !~~~> Reject step
      IF (RejectMoreH) THEN
         Hnew = H*FacRej
      END IF
      RejectMoreH = RejectLastH
      RejectLastH = .TRUE.
      H = Hnew
      IF (Nacc >= 1) THEN
         Nrej = Nrej+1
      END IF
   END IF ! Err <= 1

   END DO UntilAccepted

   END DO TimeLoop

!~~~> Succesful exit
   IERR = 1  !~~~> The integration was successful

  END SUBROUTINE ros_Integrator


!~~~~~~~~~~~~~~~~~~~~~~~~~~~~~~~~~~~~~~~~~~~~~~~~~~~~~~~~~~~~~~~~~~~~~~~~~~~~
  KPP_REAL FUNCTION ros_ErrorNorm ( Y, Ynew, Yerr, &
               AbsTol, RelTol, VectorTol )
!~~~~~~~~~~~~~~~~~~~~~~~~~~~~~~~~~~~~~~~~~~~~~~~~~~~~~~~~~~~~~~~~~~~~~~~~~~~~
!~~~> Computes the "scaled norm" of the error vector Yerr
!~~~~~~~~~~~~~~~~~~~~~~~~~~~~~~~~~~~~~~~~~~~~~~~~~~~~~~~~~~~~~~~~~~~~~~~~~~~~
   IMPLICIT NONE

! Input arguments
   KPP_REAL, INTENT(IN) :: Y(NVAR), Ynew(NVAR), &
          Yerr(NVAR), AbsTol(NVAR), RelTol(NVAR)
   LOGICAL, INTENT(IN) ::  VectorTol
! Local variables
   KPP_REAL :: Err, Scale, Ymax
   INTEGER  :: i
   KPP_REAL, PARAMETER :: ZERO = 0.0_dp

   Err = ZERO
   DO i=1,NVAR
     Ymax = MAX(ABS(Y(i)),ABS(Ynew(i)))
     IF (VectorTol) THEN
       Scale = AbsTol(i)+RelTol(i)*Ymax
     ELSE
       Scale = AbsTol(1)+RelTol(1)*Ymax
     END IF
     Err = Err+(Yerr(i)/Scale)**2
   END DO
   Err  = SQRT(Err/NVAR)

   ros_ErrorNorm = Err

  END FUNCTION ros_ErrorNorm


!~~~~~~~~~~~~~~~~~~~~~~~~~~~~~~~~~~~~~~~~~~~~~~~~~~~~~~~~~~~~~~~~~~~~~~~~~~~~
  SUBROUTINE ros_FunTimeDerivative ( T, Roundoff, Y, &
                Fcn0, dFdT )
!~~~~~~~~~~~~~~~~~~~~~~~~~~~~~~~~~~~~~~~~~~~~~~~~~~~~~~~~~~~~~~~~~~~~~~~~~~~~
!~~~> The time partial derivative of the function by finite differences
!~~~~~~~~~~~~~~~~~~~~~~~~~~~~~~~~~~~~~~~~~~~~~~~~~~~~~~~~~~~~~~~~~~~~~~~~~~~~
   IMPLICIT NONE

!~~~> Input arguments
   KPP_REAL, INTENT(IN) :: T, Roundoff, Y(NVAR), Fcn0(NVAR)
!~~~> Output arguments
   KPP_REAL, INTENT(OUT) :: dFdT(NVAR)
!~~~> Local variables
   KPP_REAL :: Delta
   KPP_REAL, PARAMETER :: ONE = 1.0_dp, DeltaMin = 1.0E-6_dp

   Delta = SQRT(Roundoff)*MAX(DeltaMin,ABS(T))
   CALL FunTemplate(T+Delta,Y,dFdT)
!   CALL WAXPY(NVAR,(-ONE),Fcn0,1,dFdT,1)
   dFdt(1:NVAR) = dFdt(1:NVAR) - ONE * FcN0(1:NVAR)
!   CALL WSCAL(NVAR,(ONE/Delta),dFdT,1)
   dFDT(1:NVAR) = dFDT(1:NVAR) * (ONE/Delta)
  END SUBROUTINE ros_FunTimeDerivative


!~~~~~~~~~~~~~~~~~~~~~~~~~~~~~~~~~~~~~~~~~~~~~~~~~~~~~~~~~~~~~~~~~~~~~~~~~~~~~~~~~~~~~~~~~~~~~
  SUBROUTINE ros_PrepareMatrix ( H, Direction, gam, &
             Jac0, Ghimj, Pivot, Singular )
! --- --- --- --- --- --- --- --- --- --- --- --- ---
!  Prepares the LHS matrix for stage calculations
!  1.  Construct Ghimj = 1/(H*ham) - Jac0
!      "(Gamma H) Inverse Minus Jacobian"
!  2.  Repeat LU decomposition of Ghimj until successful.
!       -half the step size if LU decomposition fails and retry
!       -exit after 5 consecutive fails
! --- --- --- --- --- --- --- --- --- --- --- --- ---
   IMPLICIT NONE

!~~~> Input arguments
#ifdef FULL_ALGEBRA    
   KPP_REAL, INTENT(IN) ::  Jac0(NVAR,NVAR)
#else
   KPP_REAL, INTENT(IN) ::  Jac0(LU_NONZERO)
#endif   
   KPP_REAL, INTENT(IN) ::  gam
   INTEGER, INTENT(IN) ::  Direction
!~~~> Output arguments
#ifdef FULL_ALGEBRA    
   KPP_REAL, INTENT(OUT) :: Ghimj(NVAR,NVAR)
#else
   KPP_REAL, INTENT(OUT) :: Ghimj(LU_NONZERO)
#endif   
   LOGICAL, INTENT(OUT) ::  Singular
   INTEGER, INTENT(OUT) ::  Pivot(NVAR)
!~~~> Inout arguments
   KPP_REAL, INTENT(INOUT) :: H   ! step size is decreased when LU fails
!~~~> Local variables
   INTEGER  :: i, ising, Nconsecutive
   KPP_REAL :: ghinv
   KPP_REAL, PARAMETER :: ONE  = 1.0_dp, HALF = 0.5_dp

   Nconsecutive = 0
   Singular = .TRUE.

   DO WHILE (Singular)

!~~~>    Construct Ghimj = 1/(H*gam) - Jac0
#ifdef FULL_ALGEBRA    
!     CALL WCOPY(NVAR*NVAR,Jac0,1,Ghimj,1)
     Ghimj(1:NVAR,1:NVAR) = JAC0(1:NVAR,1:NVAR)
!     CALL WSCAL(NVAR*NVAR,(-ONE),Ghimj,1)
     Ghimj(1:NVAR,1:NVAR) = (-ONE) * Ghimj(1:NVAR,1:NVAR)
     ghinv = ONE/(Direction*H*gam)
     DO i=1,NVAR
       Ghimj(i,i) = Ghimj(i,i)+ghinv
     END DO
#else
!     CALL WCOPY(LU_NONZERO,Jac0,1,Ghimj,1)
     Ghimj(1:LU_NONZERO) = JAC0(1:LU_NONZERO)
!     CALL WSCAL(LU_NONZERO,(-ONE),Ghimj,1)
     Ghimj(1:LU_NONZERO) = (-ONE) * Ghimj(1:LU_NONZERO) 
     ghinv = ONE/(Direction*H*gam)
     DO i=1,NVAR
       Ghimj(LU_DIAG(i)) = Ghimj(LU_DIAG(i))+ghinv
     END DO
#endif   
!~~~>    Compute LU decomposition
     CALL ros_Decomp( Ghimj, Pivot, ising )
     IF (ising == 0) THEN
!~~~>    If successful done
        Singular = .FALSE.
     ELSE ! ising .ne. 0
!~~~>    If unsuccessful half the step size; if 5 consecutive fails then return
        Nsng = Nsng+1
        Nconsecutive = Nconsecutive+1
        Singular = .TRUE.
        PRINT*,'Warning: LU Decomposition returned ising = ',ising
        IF (Nconsecutive <= 5) THEN ! Less than 5 consecutive failed decompositions
           H = H*HALF
        ELSE  ! More than 5 consecutive failed decompositions
           RETURN
        END IF  ! Nconsecutive
      END IF    ! ising

   END DO ! WHILE Singular

  END SUBROUTINE ros_PrepareMatrix


!~~~~~~~~~~~~~~~~~~~~~~~~~~~~~~~~~~~~~~~~~~~~~~~~~~~~~~~~~~~~~~~~~~~~~~~~~~~~~~~~~~~~~~~~~~~~~
  SUBROUTINE ros_Decomp( A, Pivot, ising )
!~~~~~~~~~~~~~~~~~~~~~~~~~~~~~~~~~~~~~~~~~~~~~~~~~~~~~~~~~~~~~~~~~~~~~~~~~~~~~~~~~~~~~~~~~~~~~
!  Template for the LU decomposition
!~~~~~~~~~~~~~~~~~~~~~~~~~~~~~~~~~~~~~~~~~~~~~~~~~~~~~~~~~~~~~~~~~~~~~~~~~~~~~~~~~~~~~~~~~~~~~
   IMPLICIT NONE
!~~~> Inout variables
   KPP_REAL, INTENT(INOUT) :: A(LU_NONZERO)
!~~~> Output variables
   INTEGER, INTENT(OUT) :: Pivot(NVAR), ising

#ifdef FULL_ALGEBRA    
   CALL  DGETRF( NVAR, NVAR, A, NVAR, Pivot, ising )
#else   
   CALL KppDecomp ( A, ising )
   Pivot(1) = 1
#endif
   Ndec = Ndec + 1

  END SUBROUTINE ros_Decomp


!~~~~~~~~~~~~~~~~~~~~~~~~~~~~~~~~~~~~~~~~~~~~~~~~~~~~~~~~~~~~~~~~~~~~~~~~~~~~~~~~~~~~~~~~~~~~~
  SUBROUTINE ros_Solve( A, Pivot, b )
!~~~~~~~~~~~~~~~~~~~~~~~~~~~~~~~~~~~~~~~~~~~~~~~~~~~~~~~~~~~~~~~~~~~~~~~~~~~~~~~~~~~~~~~~~~~~~
!  Template for the forward/backward substitution (using pre-computed LU decomposition)
!~~~~~~~~~~~~~~~~~~~~~~~~~~~~~~~~~~~~~~~~~~~~~~~~~~~~~~~~~~~~~~~~~~~~~~~~~~~~~~~~~~~~~~~~~~~~~
   IMPLICIT NONE
!~~~> Input variables
   KPP_REAL, INTENT(IN) :: A(LU_NONZERO)
   INTEGER, INTENT(IN) :: Pivot(NVAR)
!~~~> InOut variables
   KPP_REAL, INTENT(INOUT) :: b(NVAR)

#ifdef FULL_ALGEBRA    
   CALL  DGETRS( 'N', NVAR , 1, A, NVAR, Pivot, b, NVAR, 0 )
#else   
   CALL KppSolve( A, b )
#endif

   Nsol = Nsol+1

  END SUBROUTINE ros_Solve


!~~~~~~~~~~~~~~~~~~~~~~~~~~~~~~~~~~~~~~~~~~~~~~~~~~~~~~~~~~~~~~~~~~~~~~~~~~~~~~~~~~~~~~~~~~~~~
  SUBROUTINE Ros2 (ros_S,ros_A,ros_C,ros_M,ros_E,ros_Alpha,&
            ros_Gamma,ros_NewF,ros_ELO,ros_Name)
!~~~~~~~~~~~~~~~~~~~~~~~~~~~~~~~~~~~~~~~~~~~~~~~~~~~~~~~~~~~~~~~~~~~~~~~~~~~~~~~~~~~~~~~~~~~~~
! --- AN L-STABLE METHOD, 2 stages, order 2
!~~~~~~~~~~~~~~~~~~~~~~~~~~~~~~~~~~~~~~~~~~~~~~~~~~~~~~~~~~~~~~~~~~~~~~~~~~~~~~~~~~~~~~~~~~~~~

  IMPLICIT NONE

   INTEGER, PARAMETER :: S=2
   INTEGER, INTENT(OUT) ::  ros_S
   KPP_REAL, DIMENSION(S), INTENT(OUT) :: ros_M,ros_E,ros_Alpha,ros_Gamma
   KPP_REAL, DIMENSION(S*(S-1)/2), INTENT(OUT) :: ros_A, ros_C
   KPP_REAL, INTENT(OUT) :: ros_ELO
   LOGICAL, DIMENSION(S), INTENT(OUT) :: ros_NewF
   CHARACTER(LEN=12), INTENT(OUT) :: ros_Name
   DOUBLE PRECISION g

    g = 1.0_dp + 1.0_dp/SQRT(2.0_dp)

!~~~> Name of the method
    ros_Name = 'ROS-2'
!~~~> Number of stages
    ros_S = S

!~~~> The coefficient matrices A and C are strictly lower triangular.
!   The lower triangular (subdiagonal) elements are stored in row-wise order:
!   A(2,1) = ros_A(1), A(3,1)=ros_A(2), A(3,2)=ros_A(3), etc.
!   The general mapping formula is:
!       A(i,j) = ros_A( (i-1)*(i-2)/2 + j )
!       C(i,j) = ros_C( (i-1)*(i-2)/2 + j )

    ros_A(1) = (1.0_dp)/g
    ros_C(1) = (-2.0_dp)/g
!~~~> Does the stage i require a new function evaluation (ros_NewF(i)=TRUE)
!   or does it re-use the function evaluation from stage i-1 (ros_NewF(i)=FALSE)
    ros_NewF(1) = .TRUE.
    ros_NewF(2) = .TRUE.
!~~~> M_i = Coefficients for new step solution
    ros_M(1)= (3.0_dp)/(2.0_dp*g)
    ros_M(2)= (1.0_dp)/(2.0_dp*g)
! E_i = Coefficients for error estimator
    ros_E(1) = 1.0_dp/(2.0_dp*g)
    ros_E(2) = 1.0_dp/(2.0_dp*g)
!~~~> ros_ELO = estimator of local order - the minimum between the
!    main and the embedded scheme orders plus one
    ros_ELO = 2.0_dp
!~~~> Y_stage_i ~ Y( T + H*Alpha_i )
    ros_Alpha(1) = 0.0_dp
    ros_Alpha(2) = 1.0_dp
!~~~> Gamma_i = \sum_j  gamma_{i,j}
    ros_Gamma(1) = g
    ros_Gamma(2) =-g

 END SUBROUTINE Ros2


!~~~~~~~~~~~~~~~~~~~~~~~~~~~~~~~~~~~~~~~~~~~~~~~~~~~~~~~~~~~~~~~~~~~~~~~~~~~~~~~~~~~~~~~~~~~~~
  SUBROUTINE Ros3 (ros_S,ros_A,ros_C,ros_M,ros_E,ros_Alpha,&
           ros_Gamma,ros_NewF,ros_ELO,ros_Name)
!~~~~~~~~~~~~~~~~~~~~~~~~~~~~~~~~~~~~~~~~~~~~~~~~~~~~~~~~~~~~~~~~~~~~~~~~~~~~~~~~~~~~~~~~~~~~~
! --- AN L-STABLE METHOD, 3 stages, order 3, 2 function evaluations
!~~~~~~~~~~~~~~~~~~~~~~~~~~~~~~~~~~~~~~~~~~~~~~~~~~~~~~~~~~~~~~~~~~~~~~~~~~~~~~~~~~~~~~~~~~~~~

  IMPLICIT NONE

   INTEGER, PARAMETER :: S=3
   INTEGER, INTENT(OUT) ::  ros_S
   KPP_REAL, DIMENSION(S), INTENT(OUT) :: ros_M,ros_E,ros_Alpha,ros_Gamma
   KPP_REAL, DIMENSION(S*(S-1)/2), INTENT(OUT) :: ros_A, ros_C
   KPP_REAL, INTENT(OUT) :: ros_ELO
   LOGICAL, DIMENSION(S), INTENT(OUT) :: ros_NewF
   CHARACTER(LEN=12), INTENT(OUT) :: ros_Name

!~~~> Name of the method
   ros_Name = 'ROS-3'
!~~~> Number of stages
   ros_S = S

!~~~> The coefficient matrices A and C are strictly lower triangular.
!   The lower triangular (subdiagonal) elements are stored in row-wise order:
!   A(2,1) = ros_A(1), A(3,1)=ros_A(2), A(3,2)=ros_A(3), etc.
!   The general mapping formula is:
!       A(i,j) = ros_A( (i-1)*(i-2)/2 + j )
!       C(i,j) = ros_C( (i-1)*(i-2)/2 + j )

   ros_A(1)= 1.0_dp
   ros_A(2)= 1.0_dp
   ros_A(3)= 0.0_dp

   ros_C(1) = -0.10156171083877702091975600115545E+01_dp
   ros_C(2) =  0.40759956452537699824805835358067E+01_dp
   ros_C(3) =  0.92076794298330791242156818474003E+01_dp
!~~~> Does the stage i require a new function evaluation (ros_NewF(i)=TRUE)
!   or does it re-use the function evaluation from stage i-1 (ros_NewF(i)=FALSE)
   ros_NewF(1) = .TRUE.
   ros_NewF(2) = .TRUE.
   ros_NewF(3) = .FALSE.
!~~~> M_i = Coefficients for new step solution
   ros_M(1) =  0.1E+01_dp
   ros_M(2) =  0.61697947043828245592553615689730E+01_dp
   ros_M(3) = -0.42772256543218573326238373806514E+00_dp
! E_i = Coefficients for error estimator
   ros_E(1) =  0.5E+00_dp
   ros_E(2) = -0.29079558716805469821718236208017E+01_dp
   ros_E(3) =  0.22354069897811569627360909276199E+00_dp
!~~~> ros_ELO = estimator of local order - the minimum between the
!    main and the embedded scheme orders plus 1
   ros_ELO = 3.0_dp
!~~~> Y_stage_i ~ Y( T + H*Alpha_i )
   ros_Alpha(1)= 0.0E+00_dp
   ros_Alpha(2)= 0.43586652150845899941601945119356E+00_dp
   ros_Alpha(3)= 0.43586652150845899941601945119356E+00_dp
!~~~> Gamma_i = \sum_j  gamma_{i,j}
   ros_Gamma(1)= 0.43586652150845899941601945119356E+00_dp
   ros_Gamma(2)= 0.24291996454816804366592249683314E+00_dp
   ros_Gamma(3)= 0.21851380027664058511513169485832E+01_dp

  END SUBROUTINE Ros3

!~~~~~~~~~~~~~~~~~~~~~~~~~~~~~~~~~~~~~~~~~~~~~~~~~~~~~~~~~~~~~~~~~~~~~~~~~~~~~~~~~~~~~~~~~~~~~


!~~~~~~~~~~~~~~~~~~~~~~~~~~~~~~~~~~~~~~~~~~~~~~~~~~~~~~~~~~~~~~~~~~~~~~~~~~~~~~~~~~~~~~~~~~~~~
  SUBROUTINE Ros4 (ros_S,ros_A,ros_C,ros_M,ros_E,ros_Alpha,&
           ros_Gamma,ros_NewF,ros_ELO,ros_Name)
!~~~~~~~~~~~~~~~~~~~~~~~~~~~~~~~~~~~~~~~~~~~~~~~~~~~~~~~~~~~~~~~~~~~~~~~~~~~~~~~~~~~~~~~~~~~~~
!     L-STABLE ROSENBROCK METHOD OF ORDER 4, WITH 4 STAGES
!     L-STABLE EMBEDDED ROSENBROCK METHOD OF ORDER 3
!
!      E. HAIRER AND G. WANNER, SOLVING ORDINARY DIFFERENTIAL
!      EQUATIONS II. STIFF AND DIFFERENTIAL-ALGEBRAIC PROBLEMS.
!      SPRINGER SERIES IN COMPUTATIONAL MATHEMATICS,
!      SPRINGER-VERLAG (1990)
!~~~~~~~~~~~~~~~~~~~~~~~~~~~~~~~~~~~~~~~~~~~~~~~~~~~~~~~~~~~~~~~~~~~~~~~~~~~~~~~~~~~~~~~~~~~~~

  IMPLICIT NONE

   INTEGER, PARAMETER :: S=4
   INTEGER, INTENT(OUT) ::  ros_S
   KPP_REAL, DIMENSION(4), INTENT(OUT) :: ros_M,ros_E,ros_Alpha,ros_Gamma
   KPP_REAL, DIMENSION(6), INTENT(OUT) :: ros_A, ros_C
   KPP_REAL, INTENT(OUT) :: ros_ELO
   LOGICAL, DIMENSION(4), INTENT(OUT) :: ros_NewF
   CHARACTER(LEN=12), INTENT(OUT) :: ros_Name
   DOUBLE PRECISION g

!~~~> Name of the method
   ros_Name = 'ROS-4'
!~~~> Number of stages
   ros_S = S

!~~~> The coefficient matrices A and C are strictly lower triangular.
!   The lower triangular (subdiagonal) elements are stored in row-wise order:
!   A(2,1) = ros_A(1), A(3,1)=ros_A(2), A(3,2)=ros_A(3), etc.
!   The general mapping formula is:
!       A(i,j) = ros_A( (i-1)*(i-2)/2 + j )
!       C(i,j) = ros_C( (i-1)*(i-2)/2 + j )

   ros_A(1) = 0.2000000000000000E+01_dp
   ros_A(2) = 0.1867943637803922E+01_dp
   ros_A(3) = 0.2344449711399156E+00_dp
   ros_A(4) = ros_A(2)
   ros_A(5) = ros_A(3)
   ros_A(6) = 0.0_dp

   ros_C(1) =-0.7137615036412310E+01_dp
   ros_C(2) = 0.2580708087951457E+01_dp
   ros_C(3) = 0.6515950076447975E+00_dp
   ros_C(4) =-0.2137148994382534E+01_dp
   ros_C(5) =-0.3214669691237626E+00_dp
   ros_C(6) =-0.6949742501781779E+00_dp
!~~~> Does the stage i require a new function evaluation (ros_NewF(i)=TRUE)
!   or does it re-use the function evaluation from stage i-1 (ros_NewF(i)=FALSE)
   ros_NewF(1)  = .TRUE.
   ros_NewF(2)  = .TRUE.
   ros_NewF(3)  = .TRUE.
   ros_NewF(4)  = .FALSE.
!~~~> M_i = Coefficients for new step solution
   ros_M(1) = 0.2255570073418735E+01_dp
   ros_M(2) = 0.2870493262186792E+00_dp
   ros_M(3) = 0.4353179431840180E+00_dp
   ros_M(4) = 0.1093502252409163E+01_dp
!~~~> E_i  = Coefficients for error estimator
   ros_E(1) =-0.2815431932141155E+00_dp
   ros_E(2) =-0.7276199124938920E-01_dp
   ros_E(3) =-0.1082196201495311E+00_dp
   ros_E(4) =-0.1093502252409163E+01_dp
!~~~> ros_ELO  = estimator of local order - the minimum between the
!    main and the embedded scheme orders plus 1
   ros_ELO  = 4.0_dp
!~~~> Y_stage_i ~ Y( T + H*Alpha_i )
   ros_Alpha(1) = 0.0_dp
   ros_Alpha(2) = 0.1145640000000000E+01_dp
   ros_Alpha(3) = 0.6552168638155900E+00_dp
   ros_Alpha(4) = ros_Alpha(3)
!~~~> Gamma_i = \sum_j  gamma_{i,j}
   ros_Gamma(1) = 0.5728200000000000E+00_dp
   ros_Gamma(2) =-0.1769193891319233E+01_dp
   ros_Gamma(3) = 0.7592633437920482E+00_dp
   ros_Gamma(4) =-0.1049021087100450E+00_dp

  END SUBROUTINE Ros4

!~~~~~~~~~~~~~~~~~~~~~~~~~~~~~~~~~~~~~~~~~~~~~~~~~~~~~~~~~~~~~~~~~~~~~~~~~~~~~~~~~~~~~~~~~~~~~
  SUBROUTINE Rodas3 (ros_S,ros_A,ros_C,ros_M,ros_E,ros_Alpha,&
            ros_Gamma,ros_NewF,ros_ELO,ros_Name)
!~~~~~~~~~~~~~~~~~~~~~~~~~~~~~~~~~~~~~~~~~~~~~~~~~~~~~~~~~~~~~~~~~~~~~~~~~~~~~~~~~~~~~~~~~~~~~
! --- A STIFFLY-STABLE METHOD, 4 stages, order 3
!~~~~~~~~~~~~~~~~~~~~~~~~~~~~~~~~~~~~~~~~~~~~~~~~~~~~~~~~~~~~~~~~~~~~~~~~~~~~~~~~~~~~~~~~~~~~~

  IMPLICIT NONE

   INTEGER, PARAMETER :: S=4
   INTEGER, INTENT(OUT) ::  ros_S
   KPP_REAL, DIMENSION(S), INTENT(OUT) :: ros_M,ros_E,ros_Alpha,ros_Gamma
   KPP_REAL, DIMENSION(S*(S-1)/2), INTENT(OUT) :: ros_A, ros_C
   KPP_REAL, INTENT(OUT) :: ros_ELO
   LOGICAL, DIMENSION(S), INTENT(OUT) :: ros_NewF
   CHARACTER(LEN=12), INTENT(OUT) :: ros_Name
   DOUBLE PRECISION g

!~~~> Name of the method
   ros_Name = 'RODAS-3'
!~~~> Number of stages
   ros_S = S

!~~~> The coefficient matrices A and C are strictly lower triangular.
!   The lower triangular (subdiagonal) elements are stored in row-wise order:
!   A(2,1) = ros_A(1), A(3,1)=ros_A(2), A(3,2)=ros_A(3), etc.
!   The general mapping formula is:
!       A(i,j) = ros_A( (i-1)*(i-2)/2 + j )
!       C(i,j) = ros_C( (i-1)*(i-2)/2 + j )

   ros_A(1) = 0.0E+00_dp
   ros_A(2) = 2.0E+00_dp
   ros_A(3) = 0.0E+00_dp
   ros_A(4) = 2.0E+00_dp
   ros_A(5) = 0.0E+00_dp
   ros_A(6) = 1.0E+00_dp

   ros_C(1) = 4.0E+00_dp
   ros_C(2) = 1.0E+00_dp
   ros_C(3) =-1.0E+00_dp
   ros_C(4) = 1.0E+00_dp
   ros_C(5) =-1.0E+00_dp
   ros_C(6) =-(8.0E+00_dp/3.0E+00_dp)

!~~~> Does the stage i require a new function evaluation (ros_NewF(i)=TRUE)
!   or does it re-use the function evaluation from stage i-1 (ros_NewF(i)=FALSE)
   ros_NewF(1)  = .TRUE.
   ros_NewF(2)  = .FALSE.
   ros_NewF(3)  = .TRUE.
   ros_NewF(4)  = .TRUE.
!~~~> M_i = Coefficients for new step solution
   ros_M(1) = 2.0E+00_dp
   ros_M(2) = 0.0E+00_dp
   ros_M(3) = 1.0E+00_dp
   ros_M(4) = 1.0E+00_dp
!~~~> E_i  = Coefficients for error estimator
   ros_E(1) = 0.0E+00_dp
   ros_E(2) = 0.0E+00_dp
   ros_E(3) = 0.0E+00_dp
   ros_E(4) = 1.0E+00_dp
!~~~> ros_ELO  = estimator of local order - the minimum between the
!    main and the embedded scheme orders plus 1
   ros_ELO  = 3.0E+00_dp
!~~~> Y_stage_i ~ Y( T + H*Alpha_i )
   ros_Alpha(1) = 0.0E+00_dp
   ros_Alpha(2) = 0.0E+00_dp
   ros_Alpha(3) = 1.0E+00_dp
   ros_Alpha(4) = 1.0E+00_dp
!~~~> Gamma_i = \sum_j  gamma_{i,j}
   ros_Gamma(1) = 0.5E+00_dp
   ros_Gamma(2) = 1.5E+00_dp
   ros_Gamma(3) = 0.0E+00_dp
   ros_Gamma(4) = 0.0E+00_dp

  END SUBROUTINE Rodas3

!~~~~~~~~~~~~~~~~~~~~~~~~~~~~~~~~~~~~~~~~~~~~~~~~~~~~~~~~~~~~~~~~~~~~~~~~~~~~~~~~~~~~~~~~~~~~~
  SUBROUTINE Rodas4 (ros_S,ros_A,ros_C,ros_M,ros_E,ros_Alpha,&
             ros_Gamma,ros_NewF,ros_ELO,ros_Name)
!~~~~~~~~~~~~~~~~~~~~~~~~~~~~~~~~~~~~~~~~~~~~~~~~~~~~~~~~~~~~~~~~~~~~~~~~~~~~~~~~~~~~~~~~~~~~~
!     STIFFLY-STABLE ROSENBROCK METHOD OF ORDER 4, WITH 6 STAGES
!
!      E. HAIRER AND G. WANNER, SOLVING ORDINARY DIFFERENTIAL
!      EQUATIONS II. STIFF AND DIFFERENTIAL-ALGEBRAIC PROBLEMS.
!      SPRINGER SERIES IN COMPUTATIONAL MATHEMATICS,
!      SPRINGER-VERLAG (1996)
!~~~~~~~~~~~~~~~~~~~~~~~~~~~~~~~~~~~~~~~~~~~~~~~~~~~~~~~~~~~~~~~~~~~~~~~~~~~~~~~~~~~~~~~~~~~~~

  IMPLICIT NONE

   INTEGER, PARAMETER :: S=6
   INTEGER, INTENT(OUT) ::  ros_S
   KPP_REAL, DIMENSION(S), INTENT(OUT) :: ros_M,ros_E,ros_Alpha,ros_Gamma
   KPP_REAL, DIMENSION(S*(S-1)/2), INTENT(OUT) :: ros_A, ros_C
   KPP_REAL, INTENT(OUT) :: ros_ELO
   LOGICAL, DIMENSION(S), INTENT(OUT) :: ros_NewF
   CHARACTER(LEN=12), INTENT(OUT) :: ros_Name
   DOUBLE PRECISION g

!~~~> Name of the method
    ros_Name = 'RODAS-4'
!~~~> Number of stages
    ros_S = 6

!~~~> Y_stage_i ~ Y( T + H*Alpha_i )
    ros_Alpha(1) = 0.000_dp
    ros_Alpha(2) = 0.386_dp
    ros_Alpha(3) = 0.210_dp
    ros_Alpha(4) = 0.630_dp
    ros_Alpha(5) = 1.000_dp
    ros_Alpha(6) = 1.000_dp

!~~~> Gamma_i = \sum_j  gamma_{i,j}
    ros_Gamma(1) = 0.2500000000000000E+00_dp
    ros_Gamma(2) =-0.1043000000000000E+00_dp
    ros_Gamma(3) = 0.1035000000000000E+00_dp
    ros_Gamma(4) =-0.3620000000000023E-01_dp
    ros_Gamma(5) = 0.0_dp
    ros_Gamma(6) = 0.0_dp

!~~~> The coefficient matrices A and C are strictly lower triangular.
!   The lower triangular (subdiagonal) elements are stored in row-wise order:
!   A(2,1) = ros_A(1), A(3,1)=ros_A(2), A(3,2)=ros_A(3), etc.
!   The general mapping formula is:  A(i,j) = ros_A( (i-1)*(i-2)/2 + j )
!                  C(i,j) = ros_C( (i-1)*(i-2)/2 + j )

    ros_A(1) = 0.1544000000000000E+01_dp
    ros_A(2) = 0.9466785280815826E+00_dp
    ros_A(3) = 0.2557011698983284E+00_dp
    ros_A(4) = 0.3314825187068521E+01_dp
    ros_A(5) = 0.2896124015972201E+01_dp
    ros_A(6) = 0.9986419139977817E+00_dp
    ros_A(7) = 0.1221224509226641E+01_dp
    ros_A(8) = 0.6019134481288629E+01_dp
    ros_A(9) = 0.1253708332932087E+02_dp
    ros_A(10) =-0.6878860361058950E+00_dp
    ros_A(11) = ros_A(7)
    ros_A(12) = ros_A(8)
    ros_A(13) = ros_A(9)
    ros_A(14) = ros_A(10)
    ros_A(15) = 1.0E+00_dp

    ros_C(1) =-0.5668800000000000E+01_dp
    ros_C(2) =-0.2430093356833875E+01_dp
    ros_C(3) =-0.2063599157091915E+00_dp
    ros_C(4) =-0.1073529058151375E+00_dp
    ros_C(5) =-0.9594562251023355E+01_dp
    ros_C(6) =-0.2047028614809616E+02_dp
    ros_C(7) = 0.7496443313967647E+01_dp
    ros_C(8) =-0.1024680431464352E+02_dp
    ros_C(9) =-0.3399990352819905E+02_dp
    ros_C(10) = 0.1170890893206160E+02_dp
    ros_C(11) = 0.8083246795921522E+01_dp
    ros_C(12) =-0.7981132988064893E+01_dp
    ros_C(13) =-0.3152159432874371E+02_dp
    ros_C(14) = 0.1631930543123136E+02_dp
    ros_C(15) =-0.6058818238834054E+01_dp

!~~~> M_i = Coefficients for new step solution
    ros_M(1) = ros_A(7)
    ros_M(2) = ros_A(8)
    ros_M(3) = ros_A(9)
    ros_M(4) = ros_A(10)
    ros_M(5) = 1.0E+00_dp
    ros_M(6) = 1.0E+00_dp

!~~~> E_i  = Coefficients for error estimator
    ros_E(1) = 0.0E+00_dp
    ros_E(2) = 0.0E+00_dp
    ros_E(3) = 0.0E+00_dp
    ros_E(4) = 0.0E+00_dp
    ros_E(5) = 0.0E+00_dp
    ros_E(6) = 1.0E+00_dp

!~~~> Does the stage i require a new function evaluation (ros_NewF(i)=TRUE)
!   or does it re-use the function evaluation from stage i-1 (ros_NewF(i)=FALSE)
    ros_NewF(1) = .TRUE.
    ros_NewF(2) = .TRUE.
    ros_NewF(3) = .TRUE.
    ros_NewF(4) = .TRUE.
    ros_NewF(5) = .TRUE.
    ros_NewF(6) = .TRUE.

!~~~> ros_ELO  = estimator of local order - the minimum between the
!        main and the embedded scheme orders plus 1
    ros_ELO = 4.0_dp

  END SUBROUTINE Rodas4

!~~~~~~~~~~~~~~~~~~~~~~~~~~~~~~~~~~~~~~~~~~~~~~~~~~~~~~~~~~~~~~~~~~~~~~~~~~~~~~~~~~~~~~~~~~~~~
!   End of the set of internal Rosenbrock subroutines
!~~~~~~~~~~~~~~~~~~~~~~~~~~~~~~~~~~~~~~~~~~~~~~~~~~~~~~~~~~~~~~~~~~~~~~~~~~~~~~~~~~~~~~~~~~~~~
END SUBROUTINE Rosenbrock
!~~~~~~~~~~~~~~~~~~~~~~~~~~~~~~~~~~~~~~~~~~~~~~~~~~~~~~~~~~~~~~~~~~~~~~~~~~~~~~~~~~~~~~~~~~~~~


!~~~~~~~~~~~~~~~~~~~~~~~~~~~~~~~~~~~~~~~~~~~~~~~~~~~~~~~~~~~~~~~~~~~~~~~~~~~~~~~~~~~~~~~~~~~~~
SUBROUTINE FunTemplate( T, Y, Ydot )
!~~~~~~~~~~~~~~~~~~~~~~~~~~~~~~~~~~~~~~~~~~~~~~~~~~~~~~~~~~~~~~~~~~~~~~~~~~~~~~~~~~~~~~~~~~~~~
!  Template for the ODE function call.
!  Updates the rate coefficients (and possibly the fixed species) at each call
!~~~~~~~~~~~~~~~~~~~~~~~~~~~~~~~~~~~~~~~~~~~~~~~~~~~~~~~~~~~~~~~~~~~~~~~~~~~~~~~~~~~~~~~~~~~~~
 USE KPP_ROOT_Parameters
 USE KPP_ROOT_Global
 USE KPP_ROOT_Function
 USE KPP_ROOT_Rates
!~~~> Input variables
   KPP_REAL :: T, Y(NVAR)
!~~~> Output variables
   KPP_REAL :: Ydot(NVAR)
!~~~> Local variables
   KPP_REAL :: Told

   Told = TIME
   TIME = T
!   CALL Update_SUN()
!   CALL Update_RCONST()
   CALL Fun( Y, FIX, RCONST, Ydot )
   TIME = Told

   Nfun = Nfun+1

END SUBROUTINE FunTemplate


!~~~~~~~~~~~~~~~~~~~~~~~~~~~~~~~~~~~~~~~~~~~~~~~~~~~~~~~~~~~~~~~~~~~~~~~~~~~~~~~~~~~~~~~~~~~~~
SUBROUTINE JacTemplate( T, Y, Jcb )
!~~~~~~~~~~~~~~~~~~~~~~~~~~~~~~~~~~~~~~~~~~~~~~~~~~~~~~~~~~~~~~~~~~~~~~~~~~~~~~~~~~~~~~~~~~~~~
!  Template for the ODE Jacobian call.
!  Updates the rate coefficients (and possibly the fixed species) at each call
!~~~~~~~~~~~~~~~~~~~~~~~~~~~~~~~~~~~~~~~~~~~~~~~~~~~~~~~~~~~~~~~~~~~~~~~~~~~~~~~~~~~~~~~~~~~~~
 USE KPP_ROOT_Parameters
 USE KPP_ROOT_Global
 USE KPP_ROOT_Jacobian
 USE KPP_ROOT_LinearAlgebra
 USE KPP_ROOT_Rates
!~~~> Input variables
    KPP_REAL :: T, Y(NVAR)
!~~~> Output variables
#ifdef FULL_ALGEBRA    
    KPP_REAL :: JV(LU_NONZERO), Jcb(NVAR,NVAR)
#else
    KPP_REAL :: Jcb(LU_NONZERO)
#endif   
!~~~> Local variables
    KPP_REAL :: Told
#ifdef FULL_ALGEBRA    
    INTEGER :: i, j
#endif   

    Told = TIME
    TIME = T
!    CALL Update_SUN()
!    CALL Update_RCONST()
#ifdef FULL_ALGEBRA    
    CALL Jac_SP(Y, FIX, RCONST, JV)
    DO j=1,NVAR
      DO i=1,NVAR
         Jcb(i,j) = 0.0d0
      END DO
    END DO
    DO i=1,LU_NONZERO
       Jcb(LU_IROW(i),LU_ICOL(i)) = JV(i)
    END DO
#else
    CALL Jac_SP( Y, FIX, RCONST, Jcb )
#endif   
    TIME = Told

    Njac = Njac+1

END SUBROUTINE JacTemplate

END MODULE KPP_ROOT_Integrator
