# Supplementary material for: The atmospheric chemistry box model CAABA/MECCA-3.0
Source: Copernicus journal article supplement (doi:10.5194/gmd-4-373-2011), 2011-05-06
Supplement: Supplementary file 9 [file gmd-4-373-2011-supplement.zip › caaba_3.0/mecca/kpp/int/rosenbrock_posdef.f90]

! rosenbrock_posdef: positive definite following a suggestion from Adrian
! see "MAX(Ynew,ZERO)" for details

!~~~~~~~~~~~~~~~~~~~~~~~~~~~~~~~~~~~~~~~~~~~~~~~~~~~~~~~~~~~~~~~~~~~~~~~~~!
!  Rosenbrock - Implementation of several Rosenbrock methods:             !
!               * Ros2                                                    !
!               * Ros3                                                    !
!               * Ros4                                                    !
!               * Rodas3                                                  !
!               * Rodas4                                                  !
!  By default the code employs the KPP sparse linear algebra routines     !
!  Compile with -DFULL_ALGEBRA to use full linear algebra (LAPACK)        !
!                                                                         !
!    (C)  Adrian Sandu, August 2004                                       !
!    Virginia Polytechnic Institute and State University                  !
!    Contact: sandu@cs.vt.edu                                             !
!    Revised by Philipp Miehe and Adrian Sandu, May 2006                  !
!                                                                         !
!    This implementation is part of KPP - the Kinetic PreProcessor        !
!~~~~~~~~~~~~~~~~~~~~~~~~~~~~~~~~~~~~~~~~~~~~~~~~~~~~~~~~~~~~~~~~~~~~~~~~~!

MODULE KPP_ROOT_Integrator

  USE KPP_ROOT_Parameters, ONLY: NVAR, NFIX, NSPEC, LU_NONZERO
  USE KPP_ROOT_Global
  IMPLICIT NONE
  PUBLIC
  SAVE
  
!~~~>  Statistics on the work performed by the Rosenbrock method
  INTEGER, PARAMETER :: Nfun=1, Njac=2, Nstp=3, Nacc=4, &
                        Nrej=5, Ndec=6, Nsol=7, Nsng=8, &
                        Ntexit=1, Nhexit=2, Nhnew = 3

  ! description of the error numbers IERR
  CHARACTER(LEN=50), PARAMETER, DIMENSION(-8:1) :: IERR_NAMES = (/ &
    'Matrix is repeatedly singular                     ', & ! -8
    'Step size too small                               ', & ! -7
    'No of steps exceeds maximum bound                 ', & ! -6
    'Improper tolerance values                         ', & ! -5
    'FacMin/FacMax/FacRej must be positive             ', & ! -4
    'Hmin/Hmax/Hstart must be positive                 ', & ! -3
    'Selected Rosenbrock method not implemented        ', & ! -2
    'Improper value for maximal no of steps            ', & ! -1
    '                                                  ', & !  0 (not used)
    'Success                                           ' /) !  1

CONTAINS

SUBROUTINE INTEGRATE( TIN, TOUT, &
  ICNTRL_U, RCNTRL_U, ISTATUS_U, RSTATUS_U, IERR_U )

   IMPLICIT NONE

   KPP_REAL, INTENT(IN) :: TIN  ! Start Time
   KPP_REAL, INTENT(IN) :: TOUT ! End Time
   ! Optional input parameters and statistics
   INTEGER,  INTENT(IN),  OPTIONAL :: ICNTRL_U(20)
   KPP_REAL, INTENT(IN),  OPTIONAL :: RCNTRL_U(20)
   INTEGER,  INTENT(OUT), OPTIONAL :: ISTATUS_U(20)
   KPP_REAL, INTENT(OUT), OPTIONAL :: RSTATUS_U(20)
   INTEGER,  INTENT(OUT), OPTIONAL :: IERR_U

   KPP_REAL :: RCNTRL(20), RSTATUS(20)
   INTEGER       :: ICNTRL(20), ISTATUS(20), IERR

   INTEGER, SAVE :: Ntotal = 0

   ICNTRL(:)  = 0
   RCNTRL(:)  = 0.0_dp
   ISTATUS(:) = 0
   RSTATUS(:) = 0.0_dp

   ! If optional parameters are given, and if they are >0, 
   ! then they overwrite default settings. 
   IF (PRESENT(ICNTRL_U)) THEN
     WHERE(ICNTRL_U(:) > 0) ICNTRL(:) = ICNTRL_U(:)
   END IF
   IF (PRESENT(RCNTRL_U)) THEN
     WHERE(RCNTRL_U(:) > 0) RCNTRL(:) = RCNTRL_U(:)
   END IF


   CALL Rosenbrock(NVAR,VAR,TIN,TOUT,   &
         ATOL,RTOL,                &
         RCNTRL,ICNTRL,RSTATUS,ISTATUS,IERR)

   !~~~> Debug option: show no of steps
   ! Ntotal = Ntotal + ISTATUS(Nstp)
   ! PRINT*,'NSTEPS=',ISTATUS(Nstp),' (',Ntotal,')','  O3=', VAR(ind_O3)

   STEPMIN = RSTATUS(Nhexit)
   ! if optional parameters are given for output they 
   ! are updated with the return information
   IF (PRESENT(ISTATUS_U)) ISTATUS_U(:) = ISTATUS(:)
   IF (PRESENT(RSTATUS_U)) RSTATUS_U(:) = RSTATUS(:)
   IF (PRESENT(IERR_U))    IERR_U       = IERR

END SUBROUTINE INTEGRATE

!~~~~~~~~~~~~~~~~~~~~~~~~~~~~~~~~~~~~~~~~~~~~~~~~~~~~~~~~~~~~~~~~~~~~~~
SUBROUTINE Rosenbrock(N,Y,Tstart,Tend, &
           AbsTol,RelTol,              &
           RCNTRL,ICNTRL,RSTATUS,ISTATUS,IERR)
!~~~~~~~~~~~~~~~~~~~~~~~~~~~~~~~~~~~~~~~~~~~~~~~~~~~~~~~~~~~~~~~~~~~~~~
!
!    Solves the system y'=F(t,y) using a Rosenbrock method defined by:
!
!     G = 1/(H*gamma(1)) - Jac(t0,Y0)
!     T_i = t0 + Alpha(i)*H
!     Y_i = Y0 + \sum_{j=1}^{i-1} A(i,j)*K_j
!     G * K_i = Fun( T_i, Y_i ) + \sum_{j=1}^S C(i,j)/H * K_j +
!         gamma(i)*dF/dT(t0, Y0)
!     Y1 = Y0 + \sum_{j=1}^S M(j)*K_j
!
!    For details on Rosenbrock methods and their implementation consult:
!      E. Hairer and G. Wanner
!      "Solving ODEs II. Stiff and differential-algebraic problems".
!      Springer series in computational mathematics, Springer-Verlag, 1996.
!    The codes contained in the book inspired this implementation.
!
!    (C)  Adrian Sandu, August 2004
!    Virginia Polytechnic Institute and State University
!    Contact: sandu@cs.vt.edu
!    Revised by Philipp Miehe and Adrian Sandu, May 2006                  
!    This implementation is part of KPP - the Kinetic PreProcessor
!~~~~~~~~~~~~~~~~~~~~~~~~~~~~~~~~~~~~~~~~~~~~~~~~~~~~~~~~~~~~~~~~~~~~~~
!
!~~~>   INPUT ARGUMENTS:
!
!-     Y(N)    = vector of initial conditions (at T=Tstart)
!-    [Tstart,Tend]  = time range of integration
!     (if Tstart>Tend the integration is performed backwards in time)
!-    RelTol, AbsTol = user precribed accuracy
!- SUBROUTINE  Fun( T, Y, Ydot ) = ODE function,
!                       returns Ydot = Y' = F(T,Y)
!- SUBROUTINE  Jac( T, Y, Jcb ) = Jacobian of the ODE function,
!                       returns Jcb = dFun/dY
!-    ICNTRL(1:20)    = integer inputs parameters
!-    RCNTRL(1:20)    = real inputs parameters
!~~~~~~~~~~~~~~~~~~~~~~~~~~~~~~~~~~~~~~~~~~~~~~~~~~~~~~~~~~~~~~~~~~~~~~
!
!~~~>     OUTPUT ARGUMENTS:
!
!-    Y(N)    -> vector of final states (at T->Tend)
!-    ISTATUS(1:20)   -> integer output parameters
!-    RSTATUS(1:20)   -> real output parameters
!-    IERR            -> job status upon return
!                        success (positive value) or
!                        failure (negative value)
!~~~~~~~~~~~~~~~~~~~~~~~~~~~~~~~~~~~~~~~~~~~~~~~~~~~~~~~~~~~~~~~~~~~~~~
!
!~~~>     INPUT PARAMETERS:
!
!    Note: For input parameters equal to zero the default values of the
!       corresponding variables are used.
!
!    ICNTRL(1) = 1: F = F(y)   Independent of T (AUTONOMOUS)
!              = 0: F = F(t,y) Depends on T (NON-AUTONOMOUS)
!
!    ICNTRL(2) = 0: AbsTol, RelTol are N-dimensional vectors
!              = 1: AbsTol, RelTol are scalars
!
!    ICNTRL(3)  -> selection of a particular Rosenbrock method
!        = 0 :    Rodas3 (default)
!        = 1 :    Ros2
!        = 2 :    Ros3
!        = 3 :    Ros4
!        = 4 :    Rodas3
!        = 5 :    Rodas4
!
!    ICNTRL(4)  -> maximum number of integration steps
!        For ICNTRL(4)=0) the default value of 200000 is used
!
!    RCNTRL(1)  -> Hmin, lower bound for the integration step size
!          It is strongly recommended to keep Hmin = ZERO
!    RCNTRL(2)  -> Hmax, upper bound for the integration step size
!    RCNTRL(3)  -> Hstart, starting value for the integration step size
!
!    RCNTRL(4)  -> FacMin, lower bound on step decrease factor (default=0.2)
!    RCNTRL(5)  -> FacMax, upper bound on step increase factor (default=6)
!    RCNTRL(6)  -> FacRej, step decrease factor after multiple rejections
!                          (default=0.1)
!    RCNTRL(7)  -> FacSafe, by which the new step is slightly smaller
!         than the predicted value  (default=0.9)
!~~~~~~~~~~~~~~~~~~~~~~~~~~~~~~~~~~~~~~~~~~~~~~~~~~~~~~~~~~~~~~~~~~~~~~
!
!
!    OUTPUT ARGUMENTS:
!    -----------------
!
!    T           -> T value for which the solution has been computed
!                     (after successful return T=Tend).
!
!    Y(N)        -> Numerical solution at T
!
!    IDID        -> Reports on successfulness upon return:
!                    = 1 for success
!                    < 0 for error (value equals error code)
!
!    ISTATUS(1)  -> No. of function calls
!    ISTATUS(2)  -> No. of jacobian calls
!    ISTATUS(3)  -> No. of steps
!    ISTATUS(4)  -> No. of accepted steps
!    ISTATUS(5)  -> No. of rejected steps (except at very beginning)
!    ISTATUS(6)  -> No. of LU decompositions
!    ISTATUS(7)  -> No. of forward/backward substitutions
!    ISTATUS(8)  -> No. of singular matrix decompositions
!
!    RSTATUS(1)  -> Texit, the time corresponding to the
!                     computed Y upon return
!    RSTATUS(2)  -> Hexit, last accepted step before exit
!    RSTATUS(3)  -> Hnew, last predicted step (not yet taken)
!                   For multiple restarts, use Hnew as Hstart 
!                     in the subsequent run
!
!~~~~~~~~~~~~~~~~~~~~~~~~~~~~~~~~~~~~~~~~~~~~~~~~~~~~~~~~~~~~~~~~~~~~~~

  USE KPP_ROOT_Parameters
  USE KPP_ROOT_LinearAlgebra
  IMPLICIT NONE

!~~~>  Arguments
   INTEGER,       INTENT(IN)    :: N
   KPP_REAL, INTENT(INOUT) :: Y(N)
   KPP_REAL, INTENT(IN)    :: Tstart,Tend
   KPP_REAL, INTENT(IN)    :: AbsTol(N),RelTol(N)
   INTEGER,       INTENT(IN)    :: ICNTRL(20)
   KPP_REAL, INTENT(IN)    :: RCNTRL(20)
   INTEGER,       INTENT(INOUT) :: ISTATUS(20)
   KPP_REAL, INTENT(INOUT) :: RSTATUS(20)
   INTEGER, INTENT(OUT)   :: IERR
!~~~>  Parameters of the Rosenbrock method, up to 6 stages
   INTEGER ::  ros_S, rosMethod
   INTEGER, PARAMETER :: RS2=1, RS3=2, RS4=3, RD3=4, RD4=5
   KPP_REAL :: ros_A(15), ros_C(15), ros_M(6), ros_E(6), &
                    ros_Alpha(6), ros_Gamma(6), ros_ELO
   LOGICAL :: ros_NewF(6)
   CHARACTER(LEN=12) :: ros_Name
!~~~>  Local variables
   KPP_REAL :: Roundoff, FacMin, FacMax, FacRej, FacSafe
   KPP_REAL :: Hmin, Hmax, Hstart
   KPP_REAL :: Texit
   INTEGER       :: i, UplimTol, Max_no_steps
   LOGICAL       :: Autonomous, VectorTol
!~~~>   Parameters
   KPP_REAL, PARAMETER :: ZERO = 0.0_dp, ONE  = 1.0_dp
   KPP_REAL, PARAMETER :: DeltaMin = 1.0E-5_dp

!~~~>  Initialize statistics
   ISTATUS(1:8) = 0
   RSTATUS(1:3) = ZERO

!~~~>  Autonomous or time dependent ODE. Default is time dependent.
   Autonomous = .NOT.(ICNTRL(1) == 0)

!~~~>  For Scalar tolerances (ICNTRL(2).NE.0)  the code uses AbsTol(1) and RelTol(1)
!   For Vector tolerances (ICNTRL(2) == 0) the code uses AbsTol(1:N) and RelTol(1:N)
   IF (ICNTRL(2) == 0) THEN
      VectorTol = .TRUE.
      UplimTol  = N
   ELSE
      VectorTol = .FALSE.
      UplimTol  = 1
   END IF

!~~~>   Initialize the particular Rosenbrock method selected
   SELECT CASE (ICNTRL(3))
     CASE (1)
       CALL Ros2
     CASE (2)
       CALL Ros3
     CASE (3)
       CALL Ros4
     CASE (0,4)
       CALL Rodas3
     CASE (5)
       CALL Rodas4
     CASE DEFAULT
       PRINT * , 'Unknown Rosenbrock method: ICNTRL(3)=',ICNTRL(3) 
       CALL ros_ErrorMsg(-2,Tstart,ZERO,IERR)
       RETURN
   END SELECT

!~~~>   The maximum number of steps admitted
   IF (ICNTRL(4) == 0) THEN
      Max_no_steps = 200000
   ELSEIF (ICNTRL(4) > 0) THEN
      Max_no_steps=ICNTRL(4)
   ELSE
      PRINT * ,'User-selected max no. of steps: ICNTRL(4)=',ICNTRL(4)
      CALL ros_ErrorMsg(-1,Tstart,ZERO,IERR)
      RETURN
   END IF

!~~~>  Unit roundoff (1+Roundoff>1)
   Roundoff = WLAMCH('E')

!~~~>  Lower bound on the step size: (positive value)
   IF (RCNTRL(1) == ZERO) THEN
      Hmin = ZERO
   ELSEIF (RCNTRL(1) > ZERO) THEN
      Hmin = RCNTRL(1)
   ELSE
      PRINT * , 'User-selected Hmin: RCNTRL(1)=', RCNTRL(1)
      CALL ros_ErrorMsg(-3,Tstart,ZERO,IERR)
      RETURN
   END IF
!~~~>  Upper bound on the step size: (positive value)
   IF (RCNTRL(2) == ZERO) THEN
      Hmax = ABS(Tend-Tstart)
   ELSEIF (RCNTRL(2) > ZERO) THEN
      Hmax = MIN(ABS(RCNTRL(2)),ABS(Tend-Tstart))
   ELSE
      PRINT * , 'User-selected Hmax: RCNTRL(2)=', RCNTRL(2)
      CALL ros_ErrorMsg(-3,Tstart,ZERO,IERR)
      RETURN
   END IF
!~~~>  Starting step size: (positive value)
   IF (RCNTRL(3) == ZERO) THEN
      Hstart = MAX(Hmin,DeltaMin)
   ELSEIF (RCNTRL(3) > ZERO) THEN
      Hstart = MIN(ABS(RCNTRL(3)),ABS(Tend-Tstart))
   ELSE
      PRINT * , 'User-selected Hstart: RCNTRL(3)=', RCNTRL(3)
      CALL ros_ErrorMsg(-3,Tstart,ZERO,IERR)
      RETURN
   END IF
!~~~>  Step size can be changed s.t.  FacMin < Hnew/Hold < FacMax
   IF (RCNTRL(4) == ZERO) THEN
      FacMin = 0.2_dp
   ELSEIF (RCNTRL(4) > ZERO) THEN
      FacMin = RCNTRL(4)
   ELSE
      PRINT * , 'User-selected FacMin: RCNTRL(4)=', RCNTRL(4)
      CALL ros_ErrorMsg(-4,Tstart,ZERO,IERR)
      RETURN
   END IF
   IF (RCNTRL(5) == ZERO) THEN
      FacMax = 6.0_dp
   ELSEIF (RCNTRL(5) > ZERO) THEN
      FacMax = RCNTRL(5)
   ELSE
      PRINT * , 'User-selected FacMax: RCNTRL(5)=', RCNTRL(5)
      CALL ros_ErrorMsg(-4,Tstart,ZERO,IERR)
      RETURN
   END IF
!~~~>   FacRej: Factor to decrease step after 2 succesive rejections
   IF (RCNTRL(6) == ZERO) THEN
      FacRej = 0.1_dp
   ELSEIF (RCNTRL(6) > ZERO) THEN
      FacRej = RCNTRL(6)
   ELSE
      PRINT * , 'User-selected FacRej: RCNTRL(6)=', RCNTRL(6)
      CALL ros_ErrorMsg(-4,Tstart,ZERO,IERR)
      RETURN
   END IF
!~~~>   FacSafe: Safety Factor in the computation of new step size
   IF (RCNTRL(7) == ZERO) THEN
      FacSafe = 0.9_dp
   ELSEIF (RCNTRL(7) > ZERO) THEN
      FacSafe = RCNTRL(7)
   ELSE
      PRINT * , 'User-selected FacSafe: RCNTRL(7)=', RCNTRL(7)
      CALL ros_ErrorMsg(-4,Tstart,ZERO,IERR)
      RETURN
   END IF
!~~~>  Check if tolerances are reasonable
    DO i=1,UplimTol
      IF ( (AbsTol(i) <= ZERO) .OR. (RelTol(i) <= 10.0_dp*Roundoff) &
         .OR. (RelTol(i) >= 1.0_dp) ) THEN
        PRINT * , ' AbsTol(',i,') = ',AbsTol(i)
        PRINT * , ' RelTol(',i,') = ',RelTol(i)
        CALL ros_ErrorMsg(-5,Tstart,ZERO,IERR)
        RETURN
      END IF
    END DO


!~~~>  CALL Rosenbrock method
   CALL ros_Integrator(Y, Tstart, Tend, Texit,   &
        AbsTol, RelTol,                          &
!  Integration parameters
        Autonomous, VectorTol, Max_no_steps,     &
        Roundoff, Hmin, Hmax, Hstart,            &
        FacMin, FacMax, FacRej, FacSafe,         &
!  Error indicator
        IERR)

!~~~~~~~~~~~~~~~~~~~~~~~~~~~~~~~~~~~~~~~~~~~~~~~~~~~~~~~~~~~~~~~~~~~~~~~~~~~~
CONTAINS !  SUBROUTINES internal to Rosenbrock
!~~~~~~~~~~~~~~~~~~~~~~~~~~~~~~~~~~~~~~~~~~~~~~~~~~~~~~~~~~~~~~~~~~~~~~~~~~~~
   
!~~~~~~~~~~~~~~~~~~~~~~~~~~~~~~~~~~~~~~~~~~~~~~~~~~~~~~~~~~~~~~~~~~~~~~~~~~~~
 SUBROUTINE ros_ErrorMsg(Code,T,H,IERR)
!~~~~~~~~~~~~~~~~~~~~~~~~~~~~~~~~~~~~~~~~~~~~~~~~~~~~~~~~~~~~~~~~~~~~~~~~~~~~
!    Handles all error messages
!~~~~~~~~~~~~~~~~~~~~~~~~~~~~~~~~~~~~~~~~~~~~~~~~~~~~~~~~~~~~~~~~~~~~~~~~~~~~
  
   KPP_REAL, INTENT(IN) :: T, H
   INTEGER, INTENT(IN)  :: Code
   INTEGER, INTENT(OUT) :: IERR
   
   IERR = Code
   PRINT * , &
     'Forced exit from Rosenbrock due to the following error:'
   IF ((Code>=-8).AND.(Code<=-1)) THEN
     PRINT *, IERR_NAMES(Code)
   ELSE
     PRINT *, 'Unknown Error code: ', Code
   ENDIF

   PRINT *, "T=", T, "and H=", H
     
 END SUBROUTINE ros_ErrorMsg

!~~~~~~~~~~~~~~~~~~~~~~~~~~~~~~~~~~~~~~~~~~~~~~~~~~~~~~~~~~~~~~~~~~~~~~~~~~~~
 SUBROUTINE ros_Integrator (Y, Tstart, Tend, T,  &
        AbsTol, RelTol,                          &
!~~~> Integration parameters
        Autonomous, VectorTol, Max_no_steps,     &
        Roundoff, Hmin, Hmax, Hstart,            &
        FacMin, FacMax, FacRej, FacSafe,         &
!~~~> Error indicator
        IERR )
!~~~~~~~~~~~~~~~~~~~~~~~~~~~~~~~~~~~~~~~~~~~~~~~~~~~~~~~~~~~~~~~~~~~~~~~~~~~~
!   Template for the implementation of a generic Rosenbrock method
!      defined by ros_S (no of stages)
!      and its coefficients ros_{A,C,M,E,Alpha,Gamma}
!~~~~~~~~~~~~~~~~~~~~~~~~~~~~~~~~~~~~~~~~~~~~~~~~~~~~~~~~~~~~~~~~~~~~~~~~~~~~

  IMPLICIT NONE

!~~~> Input: the initial condition at Tstart; Output: the solution at T
   KPP_REAL, INTENT(INOUT) :: Y(N)
!~~~> Input: integration interval
   KPP_REAL, INTENT(IN) :: Tstart,Tend
!~~~> Output: time at which the solution is returned (T=Tend if success)
   KPP_REAL, INTENT(OUT) ::  T
!~~~> Input: tolerances
   KPP_REAL, INTENT(IN) ::  AbsTol(N), RelTol(N)
!~~~> Input: integration parameters
   LOGICAL, INTENT(IN) :: Autonomous, VectorTol
   KPP_REAL, INTENT(IN) :: Hstart, Hmin, Hmax
   INTEGER, INTENT(IN) :: Max_no_steps
   KPP_REAL, INTENT(IN) :: Roundoff, FacMin, FacMax, FacRej, FacSafe
!~~~> Output: Error indicator
   INTEGER, INTENT(OUT) :: IERR
! ~~~~ Local variables
   KPP_REAL :: Ynew(N), Fcn0(N), Fcn(N)
   KPP_REAL :: K(N*ros_S), dFdT(N)
#ifdef FULL_ALGEBRA    
   KPP_REAL :: Jac0(N,N), Ghimj(N,N)
#else
   KPP_REAL :: Jac0(LU_NONZERO), Ghimj(LU_NONZERO)
#endif
   KPP_REAL :: H, Hnew, HC, HG, Fac, Tau
   KPP_REAL :: Err, Yerr(N)
   INTEGER :: Pivot(N), Direction, ioffset, j, istage
   LOGICAL :: RejectLastH, RejectMoreH, Singular
!~~~>  Local parameters
   KPP_REAL, PARAMETER :: ZERO = 0.0_dp, ONE  = 1.0_dp
   KPP_REAL, PARAMETER :: DeltaMin = 1.0E-5_dp
!~~~>  Locally called functions
!    KPP_REAL WLAMCH
!    EXTERNAL WLAMCH
!~~~~~~~~~~~~~~~~~~~~~~~~~~~~~~~~~~~~~~~~~~~~~~~~~~~~~~~~~~~~~~~~~~~~~~~~~~~~


!~~~>  Initial preparations
   T = Tstart
   RSTATUS(Nhexit) = ZERO
   H = MIN( MAX(ABS(Hmin),ABS(Hstart)) , ABS(Hmax) )
   IF (ABS(H) <= 10.0_dp*Roundoff) H = DeltaMin

   IF (Tend  >=  Tstart) THEN
     Direction = +1
   ELSE
     Direction = -1
   END IF
   H = Direction*H

   RejectLastH=.FALSE.
   RejectMoreH=.FALSE.

!~~~> Time loop begins below

TimeLoop: DO WHILE ( (Direction > 0).AND.((T-Tend)+Roundoff <= ZERO) &
       .OR. (Direction < 0).AND.((Tend-T)+Roundoff <= ZERO) )

   IF ( ISTATUS(Nstp) > Max_no_steps ) THEN  ! Too many steps
      CALL ros_ErrorMsg(-6,T,H,IERR)
      RETURN
   END IF
   IF ( ((T+0.1_dp*H) == T).OR.(H <= Roundoff) ) THEN  ! Step size too small
      CALL ros_ErrorMsg(-7,T,H,IERR)
      RETURN
   END IF

!~~~>  Limit H if necessary to avoid going beyond Tend
   H = MIN(H,ABS(Tend-T))

!~~~>   Compute the function at current time
   CALL FunTemplate(T,Y,Fcn0)
   ISTATUS(Nfun) = ISTATUS(Nfun) + 1

!~~~>  Compute the function derivative with respect to T
   IF (.NOT.Autonomous) THEN
      CALL ros_FunTimeDerivative ( T, Roundoff, Y, &
                Fcn0, dFdT )
   END IF

!~~~>   Compute the Jacobian at current time
   CALL JacTemplate(T,Y,Jac0)
   ISTATUS(Njac) = ISTATUS(Njac) + 1

!~~~>  Repeat step calculation until current step accepted
UntilAccepted: DO

   CALL ros_PrepareMatrix(H,Direction,ros_Gamma(1), &
          Jac0,Ghimj,Pivot,Singular)
   IF (Singular) THEN ! More than 5 consecutive failed decompositions
       CALL ros_ErrorMsg(-8,T,H,IERR)
       RETURN
   END IF

!~~~>   Compute the stages
Stage: DO istage = 1, ros_S

      ! Current istage offset. Current istage vector is K(ioffset+1:ioffset+N)
       ioffset = N*(istage-1)

      ! For the 1st istage the function has been computed previously
       IF ( istage == 1 ) THEN
         CALL WCOPY(N,Fcn0,1,Fcn,1)
      ! istage>1 and a new function evaluation is needed at the current istage
       ELSEIF ( ros_NewF(istage) ) THEN
         CALL WCOPY(N,Y,1,Ynew,1)
         DO j = 1, istage-1
           CALL WAXPY(N,ros_A((istage-1)*(istage-2)/2+j), &
            K(N*(j-1)+1),1,Ynew,1)
         END DO
         Tau = T + ros_Alpha(istage)*Direction*H
         CALL FunTemplate(Tau,Ynew,Fcn)
         ISTATUS(Nfun) = ISTATUS(Nfun) + 1
       END IF ! if istage == 1 elseif ros_NewF(istage)
       CALL WCOPY(N,Fcn,1,K(ioffset+1),1)
       DO j = 1, istage-1
         HC = ros_C((istage-1)*(istage-2)/2+j)/(Direction*H)
         CALL WAXPY(N,HC,K(N*(j-1)+1),1,K(ioffset+1),1)
       END DO
       IF ((.NOT. Autonomous).AND.(ros_Gamma(istage).NE.ZERO)) THEN
         HG = Direction*H*ros_Gamma(istage)
         CALL WAXPY(N,HG,dFdT,1,K(ioffset+1),1)
       END IF
       CALL ros_Solve(Ghimj, Pivot, K(ioffset+1))

   END DO Stage


!~~~>  Compute the new solution
   CALL WCOPY(N,Y,1,Ynew,1)
   DO j=1,ros_S
         CALL WAXPY(N,ros_M(j),K(N*(j-1)+1),1,Ynew,1)
   END DO

!~~~>  Compute the error estimation
   CALL WSCAL(N,ZERO,Yerr,1)
   DO j=1,ros_S
        CALL WAXPY(N,ros_E(j),K(N*(j-1)+1),1,Yerr,1)
   END DO
   Err = ros_ErrorNorm ( Y, Ynew, Yerr, AbsTol, RelTol, VectorTol )

!~~~> New step size is bounded by FacMin <= Hnew/H <= FacMax
   Fac  = MIN(FacMax,MAX(FacMin,FacSafe/Err**(ONE/ros_ELO)))
   Hnew = H*Fac

!~~~>  Check the error magnitude and adjust step size
   ISTATUS(Nstp) = ISTATUS(Nstp) + 1
   IF ( (Err <= ONE).OR.(H <= Hmin) ) THEN  !~~~> Accept step
      ISTATUS(Nacc) = ISTATUS(Nacc) + 1
      ! mz_rs_20061212+
      ! old version did allow negative values here:
      ! CALL WCOPY(N,Ynew,1,Y,1)
      ! new value is positive definite:
      Y = MAX(Ynew,ZERO)
      ! mz_rs_20061212-
      T = T + Direction*H
      Hnew = MAX(Hmin,MIN(Hnew,Hmax))
      IF (RejectLastH) THEN  ! No step size increase after a rejected step
         Hnew = MIN(Hnew,H)
      END IF
      RSTATUS(Nhexit) = H
      RSTATUS(Nhnew)  = Hnew
      RSTATUS(Ntexit) = T
      RejectLastH = .FALSE.
      RejectMoreH = .FALSE.
      H = Hnew
      EXIT UntilAccepted ! EXIT THE LOOP: WHILE STEP NOT ACCEPTED
   ELSE           !~~~> Reject step
      IF (RejectMoreH) THEN
         Hnew = H*FacRej
      END IF
      RejectMoreH = RejectLastH
      RejectLastH = .TRUE.
      H = Hnew
      IF (ISTATUS(Nacc) >= 1)  ISTATUS(Nrej) = ISTATUS(Nrej) + 1
   END IF ! Err <= 1

   END DO UntilAccepted

   END DO TimeLoop

!~~~> Succesful exit
   IERR = 1  !~~~> The integration was successful

  END SUBROUTINE ros_Integrator


!~~~~~~~~~~~~~~~~~~~~~~~~~~~~~~~~~~~~~~~~~~~~~~~~~~~~~~~~~~~~~~~~~~~~~~~~~~~~
  KPP_REAL FUNCTION ros_ErrorNorm ( Y, Ynew, Yerr, &
                               AbsTol, RelTol, VectorTol )
!~~~~~~~~~~~~~~~~~~~~~~~~~~~~~~~~~~~~~~~~~~~~~~~~~~~~~~~~~~~~~~~~~~~~~~~~~~~~
!~~~> Computes the "scaled norm" of the error vector Yerr
!~~~~~~~~~~~~~~~~~~~~~~~~~~~~~~~~~~~~~~~~~~~~~~~~~~~~~~~~~~~~~~~~~~~~~~~~~~~~
   IMPLICIT NONE

! Input arguments
   KPP_REAL, INTENT(IN) :: Y(N), Ynew(N), &
          Yerr(N), AbsTol(N), RelTol(N)
   LOGICAL, INTENT(IN) ::  VectorTol
! Local variables
   KPP_REAL :: Err, Scale, Ymax
   INTEGER  :: i
   KPP_REAL, PARAMETER :: ZERO = 0.0_dp

   Err = ZERO
   DO i=1,N
     Ymax = MAX(ABS(Y(i)),ABS(Ynew(i)))
     IF (VectorTol) THEN
       Scale = AbsTol(i)+RelTol(i)*Ymax
     ELSE
       Scale = AbsTol(1)+RelTol(1)*Ymax
     END IF
     Err = Err+(Yerr(i)/Scale)**2
   END DO
   Err  = SQRT(Err/N)

   ros_ErrorNorm = MAX(Err,1.0d-10)

  END FUNCTION ros_ErrorNorm


!~~~~~~~~~~~~~~~~~~~~~~~~~~~~~~~~~~~~~~~~~~~~~~~~~~~~~~~~~~~~~~~~~~~~~~~~~~~~
  SUBROUTINE ros_FunTimeDerivative ( T, Roundoff, Y, &
                Fcn0, dFdT )
!~~~~~~~~~~~~~~~~~~~~~~~~~~~~~~~~~~~~~~~~~~~~~~~~~~~~~~~~~~~~~~~~~~~~~~~~~~~~
!~~~> The time partial derivative of the function by finite differences
!~~~~~~~~~~~~~~~~~~~~~~~~~~~~~~~~~~~~~~~~~~~~~~~~~~~~~~~~~~~~~~~~~~~~~~~~~~~~
   IMPLICIT NONE

!~~~> Input arguments
   KPP_REAL, INTENT(IN) :: T, Roundoff, Y(N), Fcn0(N)
!~~~> Output arguments
   KPP_REAL, INTENT(OUT) :: dFdT(N)
!~~~> Local variables
   KPP_REAL :: Delta
   KPP_REAL, PARAMETER :: ONE = 1.0_dp, DeltaMin = 1.0E-6_dp

   Delta = SQRT(Roundoff)*MAX(DeltaMin,ABS(T))
   CALL FunTemplate(T+Delta,Y,dFdT)
   ISTATUS(Nfun) = ISTATUS(Nfun) + 1
   CALL WAXPY(N,(-ONE),Fcn0,1,dFdT,1)
   CALL WSCAL(N,(ONE/Delta),dFdT,1)

  END SUBROUTINE ros_FunTimeDerivative


!~~~~~~~~~~~~~~~~~~~~~~~~~~~~~~~~~~~~~~~~~~~~~~~~~~~~~~~~~~~~~~~~~~~~~~~~~~~~~~~~~~~~~~~~~~~~~
  SUBROUTINE ros_PrepareMatrix ( H, Direction, gam, &
             Jac0, Ghimj, Pivot, Singular )
! --- --- --- --- --- --- --- --- --- --- --- --- ---
!  Prepares the LHS matrix for stage calculations
!  1.  Construct Ghimj = 1/(H*ham) - Jac0
!      "(Gamma H) Inverse Minus Jacobian"
!  2.  Repeat LU decomposition of Ghimj until successful.
!       -half the step size if LU decomposition fails and retry
!       -exit after 5 consecutive fails
! --- --- --- --- --- --- --- --- --- --- --- --- ---
   IMPLICIT NONE

!~~~> Input arguments
#ifdef FULL_ALGEBRA    
   KPP_REAL, INTENT(IN) ::  Jac0(N,N)
#else
   KPP_REAL, INTENT(IN) ::  Jac0(LU_NONZERO)
#endif   
   KPP_REAL, INTENT(IN) ::  gam
   INTEGER, INTENT(IN) ::  Direction
!~~~> Output arguments
#ifdef FULL_ALGEBRA    
   KPP_REAL, INTENT(OUT) :: Ghimj(N,N)
#else
   KPP_REAL, INTENT(OUT) :: Ghimj(LU_NONZERO)
#endif   
   LOGICAL, INTENT(OUT) ::  Singular
   INTEGER, INTENT(OUT) ::  Pivot(N)
!~~~> Inout arguments
   KPP_REAL, INTENT(INOUT) :: H   ! step size is decreased when LU fails
!~~~> Local variables
   INTEGER  :: i, ising, Nconsecutive
   KPP_REAL :: ghinv
   KPP_REAL, PARAMETER :: ONE  = 1.0_dp, HALF = 0.5_dp

   Nconsecutive = 0
   Singular = .TRUE.

   DO WHILE (Singular)

!~~~>    Construct Ghimj = 1/(H*gam) - Jac0
#ifdef FULL_ALGEBRA    
     CALL WCOPY(N*N,Jac0,1,Ghimj,1)
     CALL WSCAL(N*N,(-ONE),Ghimj,1)
     ghinv = ONE/(Direction*H*gam)
     DO i=1,N
       Ghimj(i,i) = Ghimj(i,i)+ghinv
     END DO
#else
     CALL WCOPY(LU_NONZERO,Jac0,1,Ghimj,1)
     CALL WSCAL(LU_NONZERO,(-ONE),Ghimj,1)
     ghinv = ONE/(Direction*H*gam)
     DO i=1,N
       Ghimj(LU_DIAG(i)) = Ghimj(LU_DIAG(i))+ghinv
     END DO
#endif   
!~~~>    Compute LU decomposition
     CALL ros_Decomp( Ghimj, Pivot, ising )
     IF (ising == 0) THEN
!~~~>    If successful done
        Singular = .FALSE.
     ELSE ! ising .ne. 0
!~~~>    If unsuccessful half the step size; if 5 consecutive fails then return
        ISTATUS(Nsng) = ISTATUS(Nsng) + 1
        Nconsecutive = Nconsecutive+1
        Singular = .TRUE.
        PRINT*,'Warning: LU Decomposition returned ising = ',ising
        IF (Nconsecutive <= 5) THEN ! Less than 5 consecutive failed decompositions
           H = H*HALF
        ELSE  ! More than 5 consecutive failed decompositions
           RETURN
        END IF  ! Nconsecutive
      END IF    ! ising

   END DO ! WHILE Singular

  END SUBROUTINE ros_PrepareMatrix


!~~~~~~~~~~~~~~~~~~~~~~~~~~~~~~~~~~~~~~~~~~~~~~~~~~~~~~~~~~~~~~~~~~~~~~~~~~~~~~~~~~~~~~~~~~~~~
  SUBROUTINE ros_Decomp( A, Pivot, ising )
!~~~~~~~~~~~~~~~~~~~~~~~~~~~~~~~~~~~~~~~~~~~~~~~~~~~~~~~~~~~~~~~~~~~~~~~~~~~~~~~~~~~~~~~~~~~~~
!  Template for the LU decomposition
!~~~~~~~~~~~~~~~~~~~~~~~~~~~~~~~~~~~~~~~~~~~~~~~~~~~~~~~~~~~~~~~~~~~~~~~~~~~~~~~~~~~~~~~~~~~~~
   IMPLICIT NONE
!~~~> Inout variables
   KPP_REAL, INTENT(INOUT) :: A(LU_NONZERO)
!~~~> Output variables
   INTEGER, INTENT(OUT) :: Pivot(N), ising

#ifdef FULL_ALGEBRA    
   CALL  DGETRF( N, N, A, N, Pivot, ising )
#else   
   CALL KppDecomp ( A, ising )
   Pivot(1) = 1
#endif
   ISTATUS(Ndec) = ISTATUS(Ndec) + 1

  END SUBROUTINE ros_Decomp


!~~~~~~~~~~~~~~~~~~~~~~~~~~~~~~~~~~~~~~~~~~~~~~~~~~~~~~~~~~~~~~~~~~~~~~~~~~~~~~~~~~~~~~~~~~~~~
  SUBROUTINE ros_Solve( A, Pivot, b )
!~~~~~~~~~~~~~~~~~~~~~~~~~~~~~~~~~~~~~~~~~~~~~~~~~~~~~~~~~~~~~~~~~~~~~~~~~~~~~~~~~~~~~~~~~~~~~
!  Template for the forward/backward substitution (using pre-computed LU decomposition)
!~~~~~~~~~~~~~~~~~~~~~~~~~~~~~~~~~~~~~~~~~~~~~~~~~~~~~~~~~~~~~~~~~~~~~~~~~~~~~~~~~~~~~~~~~~~~~
   IMPLICIT NONE
!~~~> Input variables
   KPP_REAL, INTENT(IN) :: A(LU_NONZERO)
   INTEGER, INTENT(IN) :: Pivot(N)
!~~~> InOut variables
   KPP_REAL, INTENT(INOUT) :: b(N)

#ifdef FULL_ALGEBRA    
   CALL  DGETRS( 'N', N , 1, A, N, Pivot, b, N, 0 )
#else   
   CALL KppSolve( A, b )
#endif

   ISTATUS(Nsol) = ISTATUS(Nsol) + 1

  END SUBROUTINE ros_Solve


!~~~~~~~~~~~~~~~~~~~~~~~~~~~~~~~~~~~~~~~~~~~~~~~~~~~~~~~~~~~~~~~~~~~~~~~~~~~~~~~~~~~~~~~~~~~~~
  SUBROUTINE Ros2
!~~~~~~~~~~~~~~~~~~~~~~~~~~~~~~~~~~~~~~~~~~~~~~~~~~~~~~~~~~~~~~~~~~~~~~~~~~~~~~~~~~~~~~~~~~~~~
! --- AN L-STABLE METHOD, 2 stages, order 2
!~~~~~~~~~~~~~~~~~~~~~~~~~~~~~~~~~~~~~~~~~~~~~~~~~~~~~~~~~~~~~~~~~~~~~~~~~~~~~~~~~~~~~~~~~~~~~

   IMPLICIT NONE
   DOUBLE PRECISION g

    g = 1.0_dp + 1.0_dp/SQRT(2.0_dp)
    rosMethod = RS2
!~~~> Name of the method
    ros_Name = 'ROS-2'
!~~~> Number of stages
    ros_S = 2

!~~~> The coefficient matrices A and C are strictly lower triangular.
!   The lower triangular (subdiagonal) elements are stored in row-wise order:
!   A(2,1) = ros_A(1), A(3,1)=ros_A(2), A(3,2)=ros_A(3), etc.
!   The general mapping formula is:
!       A(i,j) = ros_A( (i-1)*(i-2)/2 + j )
!       C(i,j) = ros_C( (i-1)*(i-2)/2 + j )

    ros_A(1) = (1.0_dp)/g
    ros_C(1) = (-2.0_dp)/g
!~~~> Does the stage i require a new function evaluation (ros_NewF(i)=TRUE)
!   or does it re-use the function evaluation from stage i-1 (ros_NewF(i)=FALSE)
    ros_NewF(1) = .TRUE.
    ros_NewF(2) = .TRUE.
!~~~> M_i = Coefficients for new step solution
    ros_M(1)= (3.0_dp)/(2.0_dp*g)
    ros_M(2)= (1.0_dp)/(2.0_dp*g)
! E_i = Coefficients for error estimator
    ros_E(1) = 1.0_dp/(2.0_dp*g)
    ros_E(2) = 1.0_dp/(2.0_dp*g)
!~~~> ros_ELO = estimator of local order - the minimum between the
!    main and the embedded scheme orders plus one
    ros_ELO = 2.0_dp
!~~~> Y_stage_i ~ Y( T + H*Alpha_i )
    ros_Alpha(1) = 0.0_dp
    ros_Alpha(2) = 1.0_dp
!~~~> Gamma_i = \sum_j  gamma_{i,j}
    ros_Gamma(1) = g
    ros_Gamma(2) =-g

 END SUBROUTINE Ros2


!~~~~~~~~~~~~~~~~~~~~~~~~~~~~~~~~~~~~~~~~~~~~~~~~~~~~~~~~~~~~~~~~~~~~~~~~~~~~~~~~~~~~~~~~~~~~~
  SUBROUTINE Ros3
!~~~~~~~~~~~~~~~~~~~~~~~~~~~~~~~~~~~~~~~~~~~~~~~~~~~~~~~~~~~~~~~~~~~~~~~~~~~~~~~~~~~~~~~~~~~~~
! --- AN L-STABLE METHOD, 3 stages, order 3, 2 function evaluations
!~~~~~~~~~~~~~~~~~~~~~~~~~~~~~~~~~~~~~~~~~~~~~~~~~~~~~~~~~~~~~~~~~~~~~~~~~~~~~~~~~~~~~~~~~~~~~

   IMPLICIT NONE
   rosMethod = RS3
!~~~> Name of the method
   ros_Name = 'ROS-3'
!~~~> Number of stages
   ros_S = 3

!~~~> The coefficient matrices A and C are strictly lower triangular.
!   The lower triangular (subdiagonal) elements are stored in row-wise order:
!   A(2,1) = ros_A(1), A(3,1)=ros_A(2), A(3,2)=ros_A(3), etc.
!   The general mapping formula is:
!       A(i,j) = ros_A( (i-1)*(i-2)/2 + j )
!       C(i,j) = ros_C( (i-1)*(i-2)/2 + j )

   ros_A(1)= 1.0_dp
   ros_A(2)= 1.0_dp
   ros_A(3)= 0.0_dp

   ros_C(1) = -0.10156171083877702091975600115545E+01_dp
   ros_C(2) =  0.40759956452537699824805835358067E+01_dp
   ros_C(3) =  0.92076794298330791242156818474003E+01_dp
!~~~> Does the stage i require a new function evaluation (ros_NewF(i)=TRUE)
!   or does it re-use the function evaluation from stage i-1 (ros_NewF(i)=FALSE)
   ros_NewF(1) = .TRUE.
   ros_NewF(2) = .TRUE.
   ros_NewF(3) = .FALSE.
!~~~> M_i = Coefficients for new step solution
   ros_M(1) =  0.1E+01_dp
   ros_M(2) =  0.61697947043828245592553615689730E+01_dp
   ros_M(3) = -0.42772256543218573326238373806514_dp
! E_i = Coefficients for error estimator
   ros_E(1) =  0.5_dp
   ros_E(2) = -0.29079558716805469821718236208017E+01_dp
   ros_E(3) =  0.22354069897811569627360909276199_dp
!~~~> ros_ELO = estimator of local order - the minimum between the
!    main and the embedded scheme orders plus 1
   ros_ELO = 3.0_dp
!~~~> Y_stage_i ~ Y( T + H*Alpha_i )
   ros_Alpha(1)= 0.0_dp
   ros_Alpha(2)= 0.43586652150845899941601945119356_dp
   ros_Alpha(3)= 0.43586652150845899941601945119356_dp
!~~~> Gamma_i = \sum_j  gamma_{i,j}
   ros_Gamma(1)= 0.43586652150845899941601945119356_dp
   ros_Gamma(2)= 0.24291996454816804366592249683314_dp
   ros_Gamma(3)= 0.21851380027664058511513169485832E+01_dp

  END SUBROUTINE Ros3

!~~~~~~~~~~~~~~~~~~~~~~~~~~~~~~~~~~~~~~~~~~~~~~~~~~~~~~~~~~~~~~~~~~~~~~~~~~~~~~~~~~~~~~~~~~~~~


!~~~~~~~~~~~~~~~~~~~~~~~~~~~~~~~~~~~~~~~~~~~~~~~~~~~~~~~~~~~~~~~~~~~~~~~~~~~~~~~~~~~~~~~~~~~~~
  SUBROUTINE Ros4
!~~~~~~~~~~~~~~~~~~~~~~~~~~~~~~~~~~~~~~~~~~~~~~~~~~~~~~~~~~~~~~~~~~~~~~~~~~~~~~~~~~~~~~~~~~~~~
!     L-STABLE ROSENBROCK METHOD OF ORDER 4, WITH 4 STAGES
!     L-STABLE EMBEDDED ROSENBROCK METHOD OF ORDER 3
!
!      E. HAIRER AND G. WANNER, SOLVING ORDINARY DIFFERENTIAL
!      EQUATIONS II. STIFF AND DIFFERENTIAL-ALGEBRAIC PROBLEMS.
!      SPRINGER SERIES IN COMPUTATIONAL MATHEMATICS,
!      SPRINGER-VERLAG (1990)
!~~~~~~~~~~~~~~~~~~~~~~~~~~~~~~~~~~~~~~~~~~~~~~~~~~~~~~~~~~~~~~~~~~~~~~~~~~~~~~~~~~~~~~~~~~~~~

   IMPLICIT NONE

   rosMethod = RS4
!~~~> Name of the method
   ros_Name = 'ROS-4'
!~~~> Number of stages
   ros_S = 4

!~~~> The coefficient matrices A and C are strictly lower triangular.
!   The lower triangular (subdiagonal) elements are stored in row-wise order:
!   A(2,1) = ros_A(1), A(3,1)=ros_A(2), A(3,2)=ros_A(3), etc.
!   The general mapping formula is:
!       A(i,j) = ros_A( (i-1)*(i-2)/2 + j )
!       C(i,j) = ros_C( (i-1)*(i-2)/2 + j )

   ros_A(1) = 0.2000000000000000E+01_dp
   ros_A(2) = 0.1867943637803922E+01_dp
   ros_A(3) = 0.2344449711399156_dp
   ros_A(4) = ros_A(2)
   ros_A(5) = ros_A(3)
   ros_A(6) = 0.0_dp

   ros_C(1) =-0.7137615036412310E+01_dp
   ros_C(2) = 0.2580708087951457E+01_dp
   ros_C(3) = 0.6515950076447975_dp
   ros_C(4) =-0.2137148994382534E+01_dp
   ros_C(5) =-0.3214669691237626_dp
   ros_C(6) =-0.6949742501781779_dp
!~~~> Does the stage i require a new function evaluation (ros_NewF(i)=TRUE)
!   or does it re-use the function evaluation from stage i-1 (ros_NewF(i)=FALSE)
   ros_NewF(1)  = .TRUE.
   ros_NewF(2)  = .TRUE.
   ros_NewF(3)  = .TRUE.
   ros_NewF(4)  = .FALSE.
!~~~> M_i = Coefficients for new step solution
   ros_M(1) = 0.2255570073418735E+01_dp
   ros_M(2) = 0.2870493262186792_dp
   ros_M(3) = 0.4353179431840180_dp
   ros_M(4) = 0.1093502252409163E+01_dp
!~~~> E_i  = Coefficients for error estimator
   ros_E(1) =-0.2815431932141155_dp
   ros_E(2) =-0.7276199124938920E-01_dp
   ros_E(3) =-0.1082196201495311_dp
   ros_E(4) =-0.1093502252409163E+01_dp
!~~~> ros_ELO  = estimator of local order - the minimum between the
!    main and the embedded scheme orders plus 1
   ros_ELO  = 4.0_dp
!~~~> Y_stage_i ~ Y( T + H*Alpha_i )
   ros_Alpha(1) = 0.0_dp
   ros_Alpha(2) = 0.1145640000000000E+01_dp
   ros_Alpha(3) = 0.6552168638155900_dp
   ros_Alpha(4) = ros_Alpha(3)
!~~~> Gamma_i = \sum_j  gamma_{i,j}
   ros_Gamma(1) = 0.5728200000000000_dp
   ros_Gamma(2) =-0.1769193891319233E+01_dp
   ros_Gamma(3) = 0.7592633437920482_dp
   ros_Gamma(4) =-0.1049021087100450_dp

  END SUBROUTINE Ros4

!~~~~~~~~~~~~~~~~~~~~~~~~~~~~~~~~~~~~~~~~~~~~~~~~~~~~~~~~~~~~~~~~~~~~~~~~~~~~~~~~~~~~~~~~~~~~~
  SUBROUTINE Rodas3
!~~~~~~~~~~~~~~~~~~~~~~~~~~~~~~~~~~~~~~~~~~~~~~~~~~~~~~~~~~~~~~~~~~~~~~~~~~~~~~~~~~~~~~~~~~~~~
! --- A STIFFLY-STABLE METHOD, 4 stages, order 3
!~~~~~~~~~~~~~~~~~~~~~~~~~~~~~~~~~~~~~~~~~~~~~~~~~~~~~~~~~~~~~~~~~~~~~~~~~~~~~~~~~~~~~~~~~~~~~

   IMPLICIT NONE

   rosMethod = RD3
!~~~> Name of the method
   ros_Name = 'RODAS-3'
!~~~> Number of stages
   ros_S = 4

!~~~> The coefficient matrices A and C are strictly lower triangular.
!   The lower triangular (subdiagonal) elements are stored in row-wise order:
!   A(2,1) = ros_A(1), A(3,1)=ros_A(2), A(3,2)=ros_A(3), etc.
!   The general mapping formula is:
!       A(i,j) = ros_A( (i-1)*(i-2)/2 + j )
!       C(i,j) = ros_C( (i-1)*(i-2)/2 + j )

   ros_A(1) = 0.0_dp
   ros_A(2) = 2.0_dp
   ros_A(3) = 0.0_dp
   ros_A(4) = 2.0_dp
   ros_A(5) = 0.0_dp
   ros_A(6) = 1.0_dp

   ros_C(1) = 4.0_dp
   ros_C(2) = 1.0_dp
   ros_C(3) =-1.0_dp
   ros_C(4) = 1.0_dp
   ros_C(5) =-1.0_dp
   ros_C(6) =-(8.0_dp/3.0_dp)

!~~~> Does the stage i require a new function evaluation (ros_NewF(i)=TRUE)
!   or does it re-use the function evaluation from stage i-1 (ros_NewF(i)=FALSE)
   ros_NewF(1)  = .TRUE.
   ros_NewF(2)  = .FALSE.
   ros_NewF(3)  = .TRUE.
   ros_NewF(4)  = .TRUE.
!~~~> M_i = Coefficients for new step solution
   ros_M(1) = 2.0_dp
   ros_M(2) = 0.0_dp
   ros_M(3) = 1.0_dp
   ros_M(4) = 1.0_dp
!~~~> E_i  = Coefficients for error estimator
   ros_E(1) = 0.0_dp
   ros_E(2) = 0.0_dp
   ros_E(3) = 0.0_dp
   ros_E(4) = 1.0_dp
!~~~> ros_ELO  = estimator of local order - the minimum between the
!    main and the embedded scheme orders plus 1
   ros_ELO  = 3.0_dp
!~~~> Y_stage_i ~ Y( T + H*Alpha_i )
   ros_Alpha(1) = 0.0_dp
   ros_Alpha(2) = 0.0_dp
   ros_Alpha(3) = 1.0_dp
   ros_Alpha(4) = 1.0_dp
!~~~> Gamma_i = \sum_j  gamma_{i,j}
   ros_Gamma(1) = 0.5_dp
   ros_Gamma(2) = 1.5_dp
   ros_Gamma(3) = 0.0_dp
   ros_Gamma(4) = 0.0_dp

  END SUBROUTINE Rodas3

!~~~~~~~~~~~~~~~~~~~~~~~~~~~~~~~~~~~~~~~~~~~~~~~~~~~~~~~~~~~~~~~~~~~~~~~~~~~~~~~~~~~~~~~~~~~~~
  SUBROUTINE Rodas4
!~~~~~~~~~~~~~~~~~~~~~~~~~~~~~~~~~~~~~~~~~~~~~~~~~~~~~~~~~~~~~~~~~~~~~~~~~~~~~~~~~~~~~~~~~~~~~
!     STIFFLY-STABLE ROSENBROCK METHOD OF ORDER 4, WITH 6 STAGES
!
!      E. HAIRER AND G. WANNER, SOLVING ORDINARY DIFFERENTIAL
!      EQUATIONS II. STIFF AND DIFFERENTIAL-ALGEBRAIC PROBLEMS.
!      SPRINGER SERIES IN COMPUTATIONAL MATHEMATICS,
!      SPRINGER-VERLAG (1996)
!~~~~~~~~~~~~~~~~~~~~~~~~~~~~~~~~~~~~~~~~~~~~~~~~~~~~~~~~~~~~~~~~~~~~~~~~~~~~~~~~~~~~~~~~~~~~~

   IMPLICIT NONE

    rosMethod = RD4
!~~~> Name of the method
    ros_Name = 'RODAS-4'
!~~~> Number of stages
    ros_S = 6

!~~~> Y_stage_i ~ Y( T + H*Alpha_i )
    ros_Alpha(1) = 0.000_dp
    ros_Alpha(2) = 0.386_dp
    ros_Alpha(3) = 0.210_dp
    ros_Alpha(4) = 0.630_dp
    ros_Alpha(5) = 1.000_dp
    ros_Alpha(6) = 1.000_dp

!~~~> Gamma_i = \sum_j  gamma_{i,j}
    ros_Gamma(1) = 0.2500000000000000_dp
    ros_Gamma(2) =-0.1043000000000000_dp
    ros_Gamma(3) = 0.1035000000000000_dp
    ros_Gamma(4) =-0.3620000000000023E-01_dp
    ros_Gamma(5) = 0.0_dp
    ros_Gamma(6) = 0.0_dp

!~~~> The coefficient matrices A and C are strictly lower triangular.
!   The lower triangular (subdiagonal) elements are stored in row-wise order:
!   A(2,1) = ros_A(1), A(3,1)=ros_A(2), A(3,2)=ros_A(3), etc.
!   The general mapping formula is:  A(i,j) = ros_A( (i-1)*(i-2)/2 + j )
!                  C(i,j) = ros_C( (i-1)*(i-2)/2 + j )

    ros_A(1) = 0.1544000000000000E+01_dp
    ros_A(2) = 0.9466785280815826_dp
    ros_A(3) = 0.2557011698983284_dp
    ros_A(4) = 0.3314825187068521E+01_dp
    ros_A(5) = 0.2896124015972201E+01_dp
    ros_A(6) = 0.9986419139977817_dp
    ros_A(7) = 0.1221224509226641E+01_dp
    ros_A(8) = 0.6019134481288629E+01_dp
    ros_A(9) = 0.1253708332932087E+02_dp
    ros_A(10) =-0.6878860361058950_dp
    ros_A(11) = ros_A(7)
    ros_A(12) = ros_A(8)
    ros_A(13) = ros_A(9)
    ros_A(14) = ros_A(10)
    ros_A(15) = 1.0_dp

    ros_C(1) =-0.5668800000000000E+01_dp
    ros_C(2) =-0.2430093356833875E+01_dp
    ros_C(3) =-0.2063599157091915_dp
    ros_C(4) =-0.1073529058151375_dp
    ros_C(5) =-0.9594562251023355E+01_dp
    ros_C(6) =-0.2047028614809616E+02_dp
    ros_C(7) = 0.7496443313967647E+01_dp
    ros_C(8) =-0.1024680431464352E+02_dp
    ros_C(9) =-0.3399990352819905E+02_dp
    ros_C(10) = 0.1170890893206160E+02_dp
    ros_C(11) = 0.8083246795921522E+01_dp
    ros_C(12) =-0.7981132988064893E+01_dp
    ros_C(13) =-0.3152159432874371E+02_dp
    ros_C(14) = 0.1631930543123136E+02_dp
    ros_C(15) =-0.6058818238834054E+01_dp

!~~~> M_i = Coefficients for new step solution
    ros_M(1) = ros_A(7)
    ros_M(2) = ros_A(8)
    ros_M(3) = ros_A(9)
    ros_M(4) = ros_A(10)
    ros_M(5) = 1.0_dp
    ros_M(6) = 1.0_dp

!~~~> E_i  = Coefficients for error estimator
    ros_E(1) = 0.0_dp
    ros_E(2) = 0.0_dp
    ros_E(3) = 0.0_dp
    ros_E(4) = 0.0_dp
    ros_E(5) = 0.0_dp
    ros_E(6) = 1.0_dp

!~~~> Does the stage i require a new function evaluation (ros_NewF(i)=TRUE)
!   or does it re-use the function evaluation from stage i-1 (ros_NewF(i)=FALSE)
    ros_NewF(1) = .TRUE.
    ros_NewF(2) = .TRUE.
    ros_NewF(3) = .TRUE.
    ros_NewF(4) = .TRUE.
    ros_NewF(5) = .TRUE.
    ros_NewF(6) = .TRUE.

!~~~> ros_ELO  = estimator of local order - the minimum between the
!        main and the embedded scheme orders plus 1
    ros_ELO = 4.0_dp

  END SUBROUTINE Rodas4

!~~~~~~~~~~~~~~~~~~~~~~~~~~~~~~~~~~~~~~~~~~~~~~~~~~~~~~~~~~~~~~~~~~~~~~~~~~~~~~~~~~~~~~~~~~~~~
!   End of the set of internal Rosenbrock subroutines
!~~~~~~~~~~~~~~~~~~~~~~~~~~~~~~~~~~~~~~~~~~~~~~~~~~~~~~~~~~~~~~~~~~~~~~~~~~~~~~~~~~~~~~~~~~~~~
END SUBROUTINE Rosenbrock
!~~~~~~~~~~~~~~~~~~~~~~~~~~~~~~~~~~~~~~~~~~~~~~~~~~~~~~~~~~~~~~~~~~~~~~~~~~~~~~~~~~~~~~~~~~~~~


!~~~~~~~~~~~~~~~~~~~~~~~~~~~~~~~~~~~~~~~~~~~~~~~~~~~~~~~~~~~~~~~~~~~~~~~~~~~~~~~~~~~~~~~~~~~~~
SUBROUTINE FunTemplate( T, Y, Ydot )
!~~~~~~~~~~~~~~~~~~~~~~~~~~~~~~~~~~~~~~~~~~~~~~~~~~~~~~~~~~~~~~~~~~~~~~~~~~~~~~~~~~~~~~~~~~~~~
!  Template for the ODE function call.
!  Updates the rate coefficients (and possibly the fixed species) at each call
!~~~~~~~~~~~~~~~~~~~~~~~~~~~~~~~~~~~~~~~~~~~~~~~~~~~~~~~~~~~~~~~~~~~~~~~~~~~~~~~~~~~~~~~~~~~~~
 USE KPP_ROOT_Parameters, ONLY: NVAR, LU_NONZERO
 USE KPP_ROOT_Global, ONLY: FIX, RCONST, TIME
 USE KPP_ROOT_Function, ONLY: Fun
 USE KPP_ROOT_Rates, ONLY: Update_SUN, Update_RCONST
!~~~> Input variables
   KPP_REAL :: T, Y(NVAR)
!~~~> Output variables
   KPP_REAL :: Ydot(NVAR)
!~~~> Local variables
   KPP_REAL :: Told

   Told = TIME
   TIME = T
   CALL Update_SUN()
   CALL Update_RCONST()
   CALL Fun( Y, FIX, RCONST, Ydot )
   TIME = Told

END SUBROUTINE FunTemplate


!~~~~~~~~~~~~~~~~~~~~~~~~~~~~~~~~~~~~~~~~~~~~~~~~~~~~~~~~~~~~~~~~~~~~~~~~~~~~~~~~~~~~~~~~~~~~~
SUBROUTINE JacTemplate( T, Y, Jcb )
!~~~~~~~~~~~~~~~~~~~~~~~~~~~~~~~~~~~~~~~~~~~~~~~~~~~~~~~~~~~~~~~~~~~~~~~~~~~~~~~~~~~~~~~~~~~~~
!  Template for the ODE Jacobian call.
!  Updates the rate coefficients (and possibly the fixed species) at each call
!~~~~~~~~~~~~~~~~~~~~~~~~~~~~~~~~~~~~~~~~~~~~~~~~~~~~~~~~~~~~~~~~~~~~~~~~~~~~~~~~~~~~~~~~~~~~~
 USE KPP_ROOT_Parameters, ONLY: NVAR, LU_NONZERO
 USE KPP_ROOT_Global, ONLY: FIX, RCONST, TIME
 USE KPP_ROOT_Jacobian, ONLY: Jac_SP, LU_IROW, LU_ICOL
 USE KPP_ROOT_LinearAlgebra
 USE KPP_ROOT_Rates, ONLY: Update_SUN, Update_RCONST
!~~~> Input variables
    KPP_REAL :: T, Y(NVAR)
!~~~> Output variables
#ifdef FULL_ALGEBRA    
    KPP_REAL :: JV(LU_NONZERO), Jcb(NVAR,NVAR)
#else
    KPP_REAL :: Jcb(LU_NONZERO)
#endif   
!~~~> Local variables
    KPP_REAL :: Told
#ifdef FULL_ALGEBRA    
    INTEGER :: i, j
#endif   

    Told = TIME
    TIME = T
    CALL Update_SUN()
    CALL Update_RCONST()
#ifdef FULL_ALGEBRA    
    CALL Jac_SP(Y, FIX, RCONST, JV)
    DO j=1,NVAR
      DO i=1,NVAR
         Jcb(i,j) = 0.0_dp
      END DO
    END DO
    DO i=1,LU_NONZERO
       Jcb(LU_IROW(i),LU_ICOL(i)) = JV(i)
    END DO
#else
    CALL Jac_SP( Y, FIX, RCONST, Jcb )
#endif   
    TIME = Told

END SUBROUTINE JacTemplate

END MODULE KPP_ROOT_Integrator
