# Supplementary material for: The atmospheric chemistry box model CAABA/MECCA-3.0
Source: Copernicus journal article supplement (doi:10.5194/gmd-4-373-2011), 2011-05-06
Supplement: Supplementary file 9 [file gmd-4-373-2011-supplement.zip › caaba_3.0/mecca/kpp/int/runge_kutta_adj.def]

 
#FUNCTION AGGREGATE
#JACOBIAN SPARSE_LU_ROW

#DOUBLE ON 
#INTFILE runge_kutta_adj
