# Supplementary material for: The atmospheric chemistry box model CAABA/MECCA-3.0
Source: Copernicus journal article supplement (doi:10.5194/gmd-4-373-2011), 2011-05-06
Supplement: Supplementary file 9 [file gmd-4-373-2011-supplement.zip › caaba_3.0/mecca/kpp/int/runge_kutta_adj.f90]

!~~~~~~~~~~~~~~~~~~~~~~~~~~~~~~~~~~~~~~~~~~~~~~~~~~~~~~~~~~~~~~~~~~~~~~~~~!
!  RungeKuttaADJ - Adjoint Model of Fully Implicit 3-stage Runge-Kutta:   !
!          * Radau-2A   quadrature (order 5)                              !
!          * Radau-1A   quadrature (order 5)                              !
!          * Lobatto-3C quadrature (order 4)                              !
!          * Gauss      quadrature (order 6)                              !
!  By default the code employs the KPP sparse linear algebra routines     !
!  Compile with -DFULL_ALGEBRA to use full linear algebra (LAPACK)        !
!                                                                         !
!    (C)  Adrian Sandu, August 2005                                       !
!    Virginia Polytechnic Institute and State University                  !
!    Contact: sandu@cs.vt.edu                                             !
!    Revised by Philipp Miehe and Adrian Sandu, May 2006                  !
!    This implementation is part of KPP - the Kinetic PreProcessor        !
!~~~~~~~~~~~~~~~~~~~~~~~~~~~~~~~~~~~~~~~~~~~~~~~~~~~~~~~~~~~~~~~~~~~~~~~~~!

MODULE KPP_ROOT_Integrator

  USE KPP_ROOT_Precision
  USE KPP_ROOT_Parameters, ONLY: NVAR, NSPEC, NFIX, LU_NONZERO
  USE KPP_ROOT_Global, ONLY: FIX, RCONST, TIME
  USE KPP_ROOT_Jacobian
  USE KPP_ROOT_LinearAlgebra

  IMPLICIT NONE
  PUBLIC
  SAVE

!~~~>  Statistics on the work performed by the Runge-Kutta method
  INTEGER :: Nfun,Njac,Nstp,Nacc,Nrej,Ndec,Nsol,Nsng
  INTEGER, PARAMETER :: ifun=1, ijac=2, istp=3, iacc=4, &
    irej=5, idec=6, isol=7, isng=8, itexit=1, ihacc=2, ihnew=3
  
CONTAINS

  ! **************************************************************************

  SUBROUTINE INTEGRATE_ADJ(NADJ, Y, Lambda, TIN, TOUT,  &
             ATOL_adj, RTOL_adj,                        &
             ICNTRL_U, RCNTRL_U, ISTATUS_U, RSTATUS_U, IERR_U )

    USE KPP_ROOT_Parameters, ONLY: NVAR
    USE KPP_ROOT_Global,     ONLY: ATOL,RTOL

    IMPLICIT NONE

!~~~> Y - Concentrations
   KPP_REAL  :: Y(NVAR)
!~~~> NADJ - No. of cost functionals for which adjoints
!                are evaluated simultaneously
!            If single cost functional is considered (like in
!                most applications) simply set NADJ = 1      
   INTEGER NADJ
!~~~> Lambda - Sensitivities of concentrations
!     Note: Lambda (1:NVAR,j) contains sensitivities of
!           the j-th cost functional w.r.t. Y(1:NVAR), j=1...NADJ
    KPP_REAL :: Lambda(NVAR,NADJ)
!~~~> Tolerances for adjoint calculations
!     (used for full continuous adjoint, and for controlling
!     the convergence of iterations for solving the discrete adjoint)   
    KPP_REAL, INTENT(IN)  :: ATOL_adj(NVAR,NADJ), RTOL_adj(NVAR,NADJ)
    KPP_REAL :: TIN  ! TIN - Start Time
    KPP_REAL :: TOUT ! TOUT - End Time
    INTEGER,       INTENT(IN),  OPTIONAL :: ICNTRL_U(20)
    KPP_REAL, INTENT(IN),  OPTIONAL :: RCNTRL_U(20)
    INTEGER,       INTENT(OUT), OPTIONAL :: ISTATUS_U(20)
    KPP_REAL, INTENT(OUT), OPTIONAL :: RSTATUS_U(20)
    INTEGER,       INTENT(OUT), OPTIONAL :: IERR_U

    INTEGER :: IERR

    KPP_REAL :: RCNTRL(20), RSTATUS(20), T1, T2
    INTEGER       :: ICNTRL(20), ISTATUS(20)
    INTEGER, SAVE :: Ntotal = 0


    ICNTRL(1:20) = 0
    RCNTRL(1:20) = 0.0_dp

    !~~~> fine-tune the integrator:
    ICNTRL(2)  = 0   ! 0=vector tolerances, 1=scalar tolerances
    ICNTRL(5)  = 8   ! Max no. of Newton iterations
    ICNTRL(6)  = 0   ! Starting values for Newton are: 0=interpolated, 1=zero
    ICNTRL(7)  = 2   ! Adj. system solved by: 1=iteration, 2=direct, 3=adaptive
    ICNTRL(8)  = 0   ! Adj. LU decomp: 0=compute, 1=save from fwd
    ICNTRL(9)  = 2   ! Adjoint: 1=none, 2=discrete, 3=full continuous, 4=simplified continuous
    ICNTRL(10) = 0   ! Error estimator: 0=classic, 1=SDIRK
    ICNTRL(11) = 1   ! Step controller: 1=Gustaffson, 2=classic


    !~~~> if optional parameters are given, and if they are >0,
    !     then use them to overwrite default settings
    IF (PRESENT(ICNTRL_U)) THEN
      WHERE(ICNTRL_U(:) > 0) ICNTRL(:) = ICNTRL_U(:)
    END IF
    IF (PRESENT(RCNTRL_U)) THEN
      WHERE(RCNTRL_U(:) > 0) RCNTRL(:) = RCNTRL_U(:)
    END IF

    
    T1 = TIN; T2 = TOUT
    CALL RungeKuttaADJ(NVAR, Y, NADJ, Lambda, T1, T2,   &
                       RTOL, ATOL, ATOL_adj, RTOL_adj,  &
                       RCNTRL, ICNTRL, RSTATUS, ISTATUS, IERR  )

    Ntotal = Ntotal + ISTATUS(istp)
!    PRINT*,'NSTEPS=',ISTATUS(istp),' (',Ntotal,')','  O3=', VAR(ind_O3)

    ! if optional parameters are given for output
    ! use them to store information in them
    IF (PRESENT(ISTATUS_U)) ISTATUS_U(:) = ISTATUS(:)
    IF (PRESENT(RSTATUS_U)) RSTATUS_U(:) = RSTATUS(:)
    IF (PRESENT(IERR_U)) IERR_U = IERR

    IF (IERR < 0) THEN
      PRINT *,'Runge-Kutta-ADJ: Unsuccessful exit at T=', TIN,' (IERR=',IERR,')'
    ENDIF

  END SUBROUTINE INTEGRATE_ADJ


!~~~~~~~~~~~~~~~~~~~~~~~~~~~~~~~~~~~~~~~~~~~~~~~~~~~~~~~~~~~~~~~~~~~~~~
  SUBROUTINE RungeKuttaADJ( N, Y, NADJ, Lambda,Tstart,Tend,      &
                         RelTol, AbsTol, RelTol_adj, AbsTol_adj, &
                         RCNTRL, ICNTRL, RSTATUS, ISTATUS, IERR )
!~~~~~~~~~~~~~~~~~~~~~~~~~~~~~~~~~~~~~~~~~~~~~~~~~~~~~~~~~~~~~~~~~~~~~~
!
!  This implementation is based on the book and the code Radau5:
!
!         E. HAIRER AND G. WANNER
!         "SOLVING ORDINARY DIFFERENTIAL EQUATIONS II. 
!              STIFF AND DIFFERENTIAL-ALGEBRAIC PROBLEMS."
!         SPRINGER SERIES IN COMPUTATIONAL MATHEMATICS 14,
!         SPRINGER-VERLAG (1991)
!
!         UNIVERSITE DE GENEVE, DEPT. DE MATHEMATIQUES
!         CH-1211 GENEVE 24, SWITZERLAND
!         E-MAIL:  HAIRER@DIVSUN.UNIGE.CH,  WANNER@DIVSUN.UNIGE.CH
!
!   Methods:
!          * Radau-2A   quadrature (order 5)                              
!          * Radau-1A   quadrature (order 5)                              
!          * Lobatto-3C quadrature (order 4)                              
!          * Gauss      quadrature (order 6)                              
!                                                                         
!   (C)  Adrian Sandu, August 2005                                       
!   Virginia Polytechnic Institute and State University                  
!   Contact: sandu@cs.vt.edu                                             
!   Revised by Philipp Miehe and Adrian Sandu, May 2006                  
!   This implementation is part of KPP - the Kinetic PreProcessor        
!
!~~~~~~~~~~~~~~~~~~~~~~~~~~~~~~~~~~~~~~~~~~~~~~~~~~~~~~~~~~~~~~~~~~~~~~
!
!~~~>   INPUT ARGUMENTS:
!       ----------------
!
!    Note: For input parameters equal to zero the default values of the
!          corresponding variables are used.
!
!     N           Dimension of the system
!     T           Initial time value
!
!     Tend        Final T value (Tend-T may be positive or negative)
!
!     Y(N)        Initial values for Y
!
!     RelTol,AbsTol   Relative and absolute error tolerances. 
!          for ICNTRL(2) = 0: AbsTol, RelTol are N-dimensional vectors
!                        = 1: AbsTol, RelTol are scalars
!
!~~~>  Integer input parameters:
!  
!    ICNTRL(1) = not used
!
!    ICNTRL(2) = 0: AbsTol, RelTol are NVAR-dimensional vectors
!              = 1: AbsTol, RelTol are scalars
!
!    ICNTRL(3) = RK method selection       
!              = 1:  Radau-2A    (the default)
!              = 2:  Lobatto-3C
!              = 3:  Gauss
!              = 4:  Radau-1A
!
!    ICNTRL(4)  -> maximum number of integration steps
!        For ICNTRL(4)=0 the default value of 10000 is used
!
!    ICNTRL(5)  -> maximum number of Newton iterations
!        For ICNTRL(5)=0 the default value of 8 is used
!
!    ICNTRL(6)  -> starting values of Newton iterations:
!        ICNTRL(6)=0 : starting values are obtained from 
!                      the extrapolated collocation solution
!                      (the default)
!        ICNTRL(6)=1 : starting values are zero
!
!    ICNTRL(7)  -> method to solve the linear ADJ equations:
!        ICNTRL(7)=0,1 : modified Newton re-using LU (the default)
!                        with a fixed number of iterations
!        ICNTRL(7)=2 :   direct solution (additional one LU factorization
!                        of 3Nx3N matrix per step); good for debugging
!        ICNTRL(7)=3 :   adaptive solution (if Newton does not converge
!                        switch to direct)
!
!    ICNTRL(8)  -> checkpointing the LU factorization at each step:
!        ICNTRL(8)=0 : do *not* save LU factorization (the default)
!        ICNTRL(8)=1 : save LU factorization
!        Note: if ICNTRL(7)=1 the LU factorization is *not* saved
!
!    ICNTRL(9) -> Type of adjoint algorithm
!         = 0 : default is discrete adjoint ( of method ICNTRL(3) )
!         = 1 : no adjoint       
!         = 2 : discrete adjoint ( of method ICNTRL(3) )
!         = 3 : fully adaptive continuous adjoint ( with method ICNTRL(6) )
!         = 4 : simplified continuous adjoint ( with method ICNTRL(6) )
!
!    ICNTRL(10) -> switch for error estimation strategy
!		ICNTRL(10) = 0: one additional stage at c=0, 
!				see Hairer (default)
!		ICNTRL(10) = 1: two additional stages at c=0 
!				and SDIRK at c=1, stiffly accurate
!
!    ICNTRL(11) -> switch for step size strategy
!              ICNTRL(11)=1:  mod. predictive controller (Gustafsson, default)
!              ICNTRL(11)=2:  classical step size control
!              the choice 1 seems to produce safer results;
!              for simple problems, the choice 2 produces
!              often slightly faster runs
!
!~~~>  Real input parameters:
!
!    RCNTRL(1)  -> Hmin, lower bound for the integration step size
!                  (highly recommended to keep Hmin = ZERO, the default)
!
!    RCNTRL(2)  -> Hmax, upper bound for the integration step size
!
!    RCNTRL(3)  -> Hstart, the starting step size
!
!    RCNTRL(4)  -> FacMin, lower bound on step decrease factor (default=0.2)
!
!    RCNTRL(5)  -> FacMax, upper bound on step increase factor (default=6)
!
!    RCNTRL(6)  -> FacRej, step decrease factor after multiple rejections
!                 (default=0.1)
!
!    RCNTRL(7)  -> FacSafe, by which the new step is slightly smaller
!                  than the predicted value  (default=0.9)
!
!    RCNTRL(8)  -> ThetaMin. If Newton convergence rate smaller
!                  than ThetaMin the Jacobian is not recomputed;
!                  (default=0.001)
!
!    RCNTRL(9)  -> NewtonTol, stopping criterion for Newton's method
!                  (default=0.03)
!
!    RCNTRL(10) -> Qmin
!
!    RCNTRL(11) -> Qmax. If Qmin < Hnew/Hold < Qmax, then the
!                  step size is kept constant and the LU factorization
!                  reused (default Qmin=1, Qmax=1.2)
!~~~~~~~~~~~~~~~~~~~~~~~~~~~~~~~~~~~~~~~~~~~~~~~~~~~~~~~~~~~~~~~~~~~~~~
!
!
!    OUTPUT ARGUMENTS:
!    -----------------
!
!    T           -> T value for which the solution has been computed
!                     (after successful return T=Tend).
!
!    Y(N)        -> Numerical solution at T
!
!    IERR        -> Reports on successfulness upon return:
!                    = 1 for success
!                    < 0 for error (value equals error code)
!
!    ISTATUS(1)  -> No. of function calls
!    ISTATUS(2)  -> No. of Jacobian calls
!    ISTATUS(3)  -> No. of steps
!    ISTATUS(4)  -> No. of accepted steps
!    ISTATUS(5)  -> No. of rejected steps (except at very beginning)
!    ISTATUS(6)  -> No. of LU decompositions
!    ISTATUS(7)  -> No. of forward/backward substitutions
!    ISTATUS(8)  -> No. of singular matrix decompositions
!
!    RSTATUS(1)  -> Texit, the time corresponding to the
!                     computed Y upon return
!    RSTATUS(2)  -> Hexit, last accepted step before exit
!    RSTATUS(3)  -> Hnew, last predicted step (not yet taken)
!                   For multiple restarts, use Hnew as Hstart 
!                     in the subsequent run
!
!~~~~~~~~~~~~~~~~~~~~~~~~~~~~~~~~~~~~~~~~~~~~~~~~~~~~~~~~~~~~~~~~~~~~~~

      IMPLICIT NONE
      
      INTEGER :: N
      INTEGER, INTENT(IN)     :: NADJ
      KPP_REAL, INTENT(INOUT) :: Lambda(N,NADJ)
      KPP_REAL, INTENT(IN) :: AbsTol_adj(N,NADJ), RelTol_adj(N,NADJ)
      KPP_REAL :: Y(N),AbsTol(N),RelTol(N),RCNTRL(20),RSTATUS(20)
      INTEGER :: ICNTRL(20), ISTATUS(20)
      LOGICAL :: StartNewton, Gustafsson, SdirkError, SaveLU
      INTEGER :: IERR, ITOL
      KPP_REAL, INTENT(IN):: Tstart,Tend
      KPP_REAL :: Texit

      !~~~> Control arguments
      INTEGER :: Max_no_steps, NewtonMaxit, AdjointType, rkMethod
      KPP_REAL :: Hmin,Hmax,Hstart,Qmin,Qmax
      KPP_REAL :: Roundoff, ThetaMin, NewtonTol
      KPP_REAL :: FacSafe,FacMin,FacMax,FacRej
      ! Runge-Kutta method parameters
      INTEGER, PARAMETER :: R2A=1, R1A=2, L3C=3, GAU=4, L3A=5
      KPP_REAL :: rkT(3,3), rkTinv(3,3), rkTinvAinv(3,3), rkAinvT(3,3), &
                       rkA(3,3), rkB(3),  rkC(3), rkD(0:3), rkE(0:3), 	   &
		       rkBgam(0:4), rkBhat(0:4), rkTheta(0:3),             &
                       rkGamma,  rkAlpha, rkBeta, rkELO
      ! ADJ method parameters
      INTEGER, PARAMETER :: KPP_ROOT_none = 1, KPP_ROOT_discrete = 2,     	   &
                            KPP_ROOT_continuous = 3, KPP_ROOT_simple_continuous = 4
      INTEGER :: AdjointSolve                      
      INTEGER, PARAMETER :: Solve_direct = 1, Solve_fixed = 2,     	   &
                            Solve_adaptive = 3
      INTEGER, PARAMETER :: bufsize = 10000
      INTEGER :: stack_ptr = 0 ! last written entry
      KPP_REAL, DIMENSION(:), POINTER :: chk_H, chk_T
      KPP_REAL, DIMENSION(:,:), POINTER :: chk_Y, chk_Z, chk_E1
      INTEGER, DIMENSION(:), POINTER :: chk_NiT
      COMPLEX(kind=dp), DIMENSION(:,:), POINTER :: chk_E2
      KPP_REAL, DIMENSION(:,:), POINTER :: chk_dY, chk_d2Y
      !~~~> Local variables
      INTEGER :: i 
      KPP_REAL, PARAMETER :: ZERO = 0.0d0, ONE = 1.0d0
    
!~~~~~~~~~~~~~~~~~~~~~~~~~~~~
!        SETTING THE PARAMETERS
!~~~~~~~~~~~~~~~~~~~~~~~~~~~~
      IERR = 0
      ISTATUS(1:20) = 0
      RSTATUS(1:20) = ZERO
       
!~~~> ICNTRL(1) - autonomous system - not used       
!~~~> ITOL: 1 for vector and 0 for scalar AbsTol/RelTol
      IF (ICNTRL(2) == 0) THEN
         ITOL = 1
      ELSE
         ITOL = 0
      END IF
!~~~> Error control selection  
      IF (ICNTRL(10) == 0) THEN 
         SdirkError = .FALSE.
      ELSE
         SdirkError = .TRUE.
      END IF      
!~~~> Method selection  
      SELECT CASE (ICNTRL(3))     
      CASE (0,1)
         CALL Radau2A_Coefficients
      CASE (2)
         CALL Lobatto3C_Coefficients
      CASE (3)
         CALL Gauss_Coefficients
      CASE (4)
         CALL Radau1A_Coefficients
      CASE DEFAULT
         WRITE(6,*) 'ICNTRL(3)=',ICNTRL(3)
         CALL RK_ErrorMsg(-13,Tstart,ZERO,IERR)
      END SELECT
!~~~> Max_no_steps: the maximal number of time steps
      IF (ICNTRL(4) == 0) THEN
         Max_no_steps = 200000
      ELSE
         Max_no_steps=ICNTRL(4)
         IF (Max_no_steps <= 0) THEN
            WRITE(6,*) 'ICNTRL(4)=',ICNTRL(4)
            CALL RK_ErrorMsg(-1,Tstart,ZERO,IERR)
         END IF
      END IF
!~~~> NewtonMaxit    maximal number of Newton iterations
      IF (ICNTRL(5) == 0) THEN
         NewtonMaxit = 8
      ELSE
         NewtonMaxit=ICNTRL(5)
         IF (NewtonMaxit <= 0) THEN
            WRITE(6,*) 'ICNTRL(5)=',ICNTRL(5)
            CALL RK_ErrorMsg(-2,Tstart,ZERO,IERR)
          END IF
      END IF
!~~~> StartNewton:  Use extrapolation for starting values of Newton iterations
      IF (ICNTRL(6) == 0) THEN
         StartNewton = .TRUE.
      ELSE
         StartNewton = .FALSE.
      END IF      
!~~~>  How to solve the linear adjoint system
      SELECT CASE (ICNTRL(7))     
      CASE (0,1)
         AdjointSolve = Solve_fixed
      CASE (2)
         AdjointSolve = Solve_direct
      CASE (3)
         AdjointSolve = Solve_adaptive
      CASE DEFAULT  
         PRINT * , 'User-selected adjoint solution: ICNTRL(7)=', ICNTRL(7)
         PRINT * , 'Implemented: =(0,1) (fixed), =2 (direct), =3 (adaptive)'
         CALL rk_ErrorMsg(-9,Tstart,ZERO,IERR)
         RETURN      
      END SELECT
!~~~>  Discrete or continuous adjoint formulation
      SELECT CASE (ICNTRL(9))     
      CASE (0,2)
         AdjointType = KPP_ROOT_discrete
      CASE (1)
         AdjointType = KPP_ROOT_none
      CASE DEFAULT  
         PRINT * , 'User-selected adjoint type: ICNTRL(9)=', ICNTRL(9)
         PRINT * , 'Implemented: =(0,2) (discrete adj) and =1 (no adj)'
         CALL rk_ErrorMsg(-9,Tstart,ZERO,IERR)
         RETURN      
      END SELECT
!~~~> Save or not the forward LU factorization
      SaveLU = (ICNTRL(8) /= 0) 
      IF (AdjointSolve == Solve_direct) SaveLU = .FALSE.
!~~~> Gustafsson: step size controller
      IF (ICNTRL(11) == 0) THEN
         Gustafsson = .TRUE.
      ELSE
         Gustafsson = .FALSE.
      END IF

!~~~> Roundoff: smallest number s.t. 1.0 + Roundoff > 1.0
      Roundoff = WLAMCH('E');

!~~~> Hmin = minimal step size
      IF (RCNTRL(1) == ZERO) THEN
         Hmin = ZERO
      ELSE
         Hmin = MIN(ABS(RCNTRL(1)),ABS(Tend-Tstart))
      END IF
!~~~> Hmax = maximal step size
      IF (RCNTRL(2) == ZERO) THEN
         Hmax = ABS(Tend-Tstart)
      ELSE
         Hmax = MIN(ABS(RCNTRL(2)),ABS(Tend-Tstart))
      END IF
!~~~> Hstart = starting step size
      IF (RCNTRL(3) == ZERO) THEN
         Hstart = ZERO
      ELSE
         Hstart = MIN(ABS(RCNTRL(3)),ABS(Tend-Tstart))
      END IF
!~~~> FacMin: lower bound on step decrease factor
      IF(RCNTRL(4) == ZERO)THEN
         FacMin = 0.2d0
      ELSE
         FacMin = RCNTRL(4)
      END IF
!~~~> FacMax: upper bound on step increase factor
      IF(RCNTRL(5) == ZERO)THEN
         FacMax = 8.D0
      ELSE
         FacMax = RCNTRL(5)
      END IF
!~~~> FacRej: step decrease factor after 2 consecutive rejections
      IF(RCNTRL(6) == ZERO)THEN
         FacRej = 0.1d0
      ELSE
         FacRej = RCNTRL(6)
      END IF
!~~~> FacSafe:  by which the new step is slightly smaller
!               than the predicted value
      IF (RCNTRL(7) == ZERO) THEN
         FacSafe=0.9d0
      ELSE
         FacSafe=RCNTRL(7)
      END IF
      IF ( (FacMax < ONE) .OR. (FacMin > ONE) .OR. &
           (FacSafe <= 1.0d-3) .OR. (FacSafe >= ONE) ) THEN
            WRITE(6,*)'RCNTRL(4:7)=',RCNTRL(4:7)
            CALL RK_ErrorMsg(-4,Tstart,ZERO,IERR)
      END IF

!~~~> ThetaMin:  decides whether the Jacobian should be recomputed
      IF (RCNTRL(8) == ZERO) THEN
         ThetaMin = 1.0d-3
      ELSE
         ThetaMin=RCNTRL(8)
         IF (ThetaMin <= 0.0d0 .OR. ThetaMin >= 1.0d0) THEN
            WRITE(6,*) 'RCNTRL(8)=', RCNTRL(8)
            CALL RK_ErrorMsg(-5,Tstart,ZERO,IERR)
         END IF
      END IF
!~~~> NewtonTol:  stopping crierion for Newton's method
      IF (RCNTRL(9) == ZERO) THEN
         NewtonTol = 3.0d-2
      ELSE
         NewtonTol = RCNTRL(9)
         IF (NewtonTol <= Roundoff) THEN
            WRITE(6,*) 'RCNTRL(9)=',RCNTRL(9)
            CALL RK_ErrorMsg(-6,Tstart,ZERO,IERR)
         END IF
      END IF
!~~~> Qmin AND Qmax: IF Qmin < Hnew/Hold < Qmax then step size = const.
      IF (RCNTRL(10) == ZERO) THEN
         Qmin=1.D0
      ELSE
         Qmin=RCNTRL(10)
      END IF
      IF (RCNTRL(11) == ZERO) THEN
         Qmax=1.2D0
      ELSE
         Qmax=RCNTRL(11)
      END IF
      IF (Qmin > ONE .OR. Qmax < ONE) THEN
         WRITE(6,*) 'RCNTRL(10:11)=',Qmin,Qmax
         CALL RK_ErrorMsg(-7,Tstart,ZERO,IERR)
      END IF
!~~~> Check if tolerances are reasonable
      IF (ITOL == 0) THEN
          IF (AbsTol(1) <= ZERO.OR.RelTol(1) <= 10.d0*Roundoff) THEN
              WRITE (6,*) 'AbsTol/RelTol=',AbsTol,RelTol 
              CALL RK_ErrorMsg(-8,Tstart,ZERO,IERR)
          END IF
      ELSE
          DO i=1,N
          IF (AbsTol(i) <= ZERO.OR.RelTol(i) <= 10.d0*Roundoff) THEN
              WRITE (6,*) 'AbsTol/RelTol(',i,')=',AbsTol(i),RelTol(i)
              CALL RK_ErrorMsg(-8,Tstart,ZERO,IERR)
          END IF
          END DO
      END IF

!~~~> Parameters are wrong
      IF (IERR < 0) RETURN

!~~~>  Allocate checkpoint space or open checkpoint files
   IF (AdjointType == KPP_ROOT_discrete) THEN
       CALL rk_AllocateDBuffers()
   ELSEIF ( (AdjointType == KPP_ROOT_continuous).OR. &
           (AdjointType == KPP_ROOT_simple_continuous) ) THEN
       CALL rk_AllocateCBuffers
   END IF

!~~~> Call the core method
      CALL RK_FwdIntegrator( N,Tstart,Tend,Y,AdjointType,IERR )
!   PRINT*,'FORWARD STATISTICS'
!   PRINT*,'Step=',Istatus(istp),' Acc=',Istatus(iacc),   &
!        ' Rej=',Istatus(irej), ' Singular=',Istatus(isng)
   Nstp = 0
   Nacc = 0
   Nrej = 0
   Nsng = 0

!~~~>  If Forward integration failed return   
   IF (IERR<0) RETURN

   SELECT CASE (AdjointType)   
   CASE (KPP_ROOT_discrete)   
     CALL rk_DadjInt (                          &
        NADJ, Lambda,                           &
        Tstart, Tend, Texit,                    &
        IERR )
   CASE (KPP_ROOT_continuous) 
     CALL rk_CadjInt (                          &
        NADJ, Lambda,                           &
        Tend, Tstart, Texit,                    &
        IERR )
   CASE (KPP_ROOT_simple_continuous)
     CALL rk_SimpleCadjInt (                    &
        NADJ, Lambda,                           &
        Tstart, Tend, Texit,                    &
        IERR )
   END SELECT ! AdjointType
!   PRINT*,'ADJOINT STATISTICS'
!   PRINT*,'Step=',Nstp,' Acc=',Nacc,             &
!        ' Rej=',Nrej, ' Singular=',Nsng

!~~~>  Free checkpoint space or close checkpoint files
   IF (AdjointType == KPP_ROOT_discrete) THEN
      CALL rk_FreeDBuffers
   ELSEIF ( (AdjointType == KPP_ROOT_continuous) .OR. &
           (AdjointType == KPP_ROOT_simple_continuous) ) THEN
      CALL rk_FreeCBuffers
   END IF


!~~~~~~~~~~~~~~~~~~~~~~~~~~~~~~~~~~~~~~~~~~~~~~~~~~~~~~~~~~~~~~~~~~~~~~~~~~~~
CONTAINS ! Internal procedures to RungeKuttaADJ
!~~~~~~~~~~~~~~~~~~~~~~~~~~~~~~~~~~~~~~~~~~~~~~~~~~~~~~~~~~~~~~~~~~~~~~~~~~~~


!~~~~~~~~~~~~~~~~~~~~~~~~~~~~~~~~~~~~~~~~~~~~~~~~~~~~~~~~~~~~~~~~~~~~~~~~~~~~
  SUBROUTINE rk_AllocateDBuffers()
!~~~>  Allocate buffer space for discrete adjoint
!~~~~~~~~~~~~~~~~~~~~~~~~~~~~~~~~~~~~~~~~~~~~~~~~~~~~~~~~~~~~~~~~~~~~~~~~~~~~
   INTEGER :: i
   
   ALLOCATE( chk_H(bufsize), STAT=i )
   IF (i/=0) THEN
      PRINT*,'Failed allocation of buffer H'; STOP
   END IF   
   ALLOCATE( chk_T(bufsize), STAT=i )
   IF (i/=0) THEN
      PRINT*,'Failed allocation of buffer T'; STOP
   END IF   
   ALLOCATE( chk_Y(NVAR,bufsize), STAT=i )
   IF (i/=0) THEN
      PRINT*,'Failed allocation of buffer Y'; STOP
   END IF   
   ALLOCATE( chk_Z(NVAR*3,bufsize), STAT=i )
   IF (i/=0) THEN
      PRINT*,'Failed allocation of buffer Z'; STOP
   END IF   
   ALLOCATE( chk_NiT(bufsize), STAT=i )
   IF (i/=0) THEN
      PRINT*,'Failed allocation of buffer NiT'; STOP
   END IF   
   IF (SaveLU) THEN 
#ifdef FULL_ALGEBRA      
     ALLOCATE( chk_E1(NVAR*NVAR,bufsize), STAT=i )
     IF (i/=0) THEN
        PRINT*,'Failed allocation of buffer E1'; STOP
     END IF   
     ALLOCATE( chk_E2(NVAR*NVAR,bufsize), STAT=i )
     IF (i/=0) THEN
        PRINT*,'Failed allocation of buffer E2'; STOP
     END IF   
#else      
     ALLOCATE( chk_E1(LU_NONZERO,bufsize), STAT=i )
     IF (i/=0) THEN
        PRINT*,'Failed allocation of buffer E1'; STOP
     END IF   
     ALLOCATE( chk_E2(LU_NONZERO,bufsize), STAT=i )
     IF (i/=0) THEN
        PRINT*,'Failed allocation of buffer E2'; STOP
     END IF   
#endif
   END IF   
   
 
 END SUBROUTINE rk_AllocateDBuffers


!~~~~~~~~~~~~~~~~~~~~~~~~~~~~~~~~~~~~~~~~~~~~~~~~~~~~~~~~~~~~~~~~~~~~~~~~~~~~
 SUBROUTINE rk_FreeDBuffers()
!~~~>  Dallocate buffer space for discrete adjoint
!~~~~~~~~~~~~~~~~~~~~~~~~~~~~~~~~~~~~~~~~~~~~~~~~~~~~~~~~~~~~~~~~~~~~~~~~~~~~
   INTEGER :: i
   
   DEALLOCATE( chk_H, STAT=i )
   IF (i/=0) THEN
      PRINT*,'Failed deallocation of buffer H'; STOP
   END IF   
   DEALLOCATE( chk_T, STAT=i )
   IF (i/=0) THEN
      PRINT*,'Failed deallocation of buffer T'; STOP
   END IF   
   DEALLOCATE( chk_Y, STAT=i )
   IF (i/=0) THEN
      PRINT*,'Failed deallocation of buffer Y'; STOP
   END IF   
   DEALLOCATE( chk_Z, STAT=i )
   IF (i/=0) THEN
      PRINT*,'Failed deallocation of buffer Z'; STOP
   END IF   
   DEALLOCATE( chk_NiT, STAT=i )
   IF (i/=0) THEN
      PRINT*,'Failed deallocation of buffer NiT'; STOP
   END IF   
   IF (SaveLU) THEN 
     DEALLOCATE( chk_E1, STAT=i )
     IF (i/=0) THEN
        PRINT*,'Failed allocation of buffer E1'; STOP
     END IF   
     DEALLOCATE( chk_E2, STAT=i )
     IF (i/=0) THEN
        PRINT*,'Failed allocation of buffer E2'; STOP
     END IF   
   END IF   

 END SUBROUTINE rk_FreeDBuffers


!~~~~~~~~~~~~~~~~~~~~~~~~~~~~~~~~~~~~~~~~~~~~~~~~~~~~~~~~~~~~~~~~~~~~~~~~~~~~
 SUBROUTINE rk_AllocateCBuffers()
!~~~>  Allocate buffer space for continuous adjoint
!~~~~~~~~~~~~~~~~~~~~~~~~~~~~~~~~~~~~~~~~~~~~~~~~~~~~~~~~~~~~~~~~~~~~~~~~~~~~
   INTEGER :: i
   
   ALLOCATE( chk_H(bufsize), STAT=i )
   IF (i/=0) THEN
      PRINT*,'Failed allocation of buffer H'; STOP
   END IF   
   ALLOCATE( chk_T(bufsize), STAT=i )
   IF (i/=0) THEN
      PRINT*,'Failed allocation of buffer T'; STOP
   END IF   
   ALLOCATE( chk_Y(NVAR,bufsize), STAT=i )
   IF (i/=0) THEN
      PRINT*,'Failed allocation of buffer Y'; STOP
   END IF   
   ALLOCATE( chk_dY(NVAR,bufsize), STAT=i )
   IF (i/=0) THEN
      PRINT*,'Failed allocation of buffer dY'; STOP
   END IF   
   ALLOCATE( chk_d2Y(NVAR,bufsize), STAT=i )
   IF (i/=0) THEN
      PRINT*,'Failed allocation of buffer d2Y'; STOP
   END IF   
 
 END SUBROUTINE rk_AllocateCBuffers


!~~~~~~~~~~~~~~~~~~~~~~~~~~~~~~~~~~~~~~~~~~~~~~~~~~~~~~~~~~~~~~~~~~~~~~~~~~~~
 SUBROUTINE rk_FreeCBuffers()
!~~~>  Dallocate buffer space for continuous adjoint
!~~~~~~~~~~~~~~~~~~~~~~~~~~~~~~~~~~~~~~~~~~~~~~~~~~~~~~~~~~~~~~~~~~~~~~~~~~~~
   INTEGER :: i
   print*,'cbuffers deallocate???'
   DEALLOCATE( chk_H, STAT=i )
   IF (i/=0) THEN
      PRINT*,'Failed deallocation of buffer H'; STOP
   END IF   
   DEALLOCATE( chk_T, STAT=i )
   IF (i/=0) THEN
      PRINT*,'Failed deallocation of buffer T'; STOP
   END IF   
   DEALLOCATE( chk_Y, STAT=i )
   IF (i/=0) THEN
      PRINT*,'Failed deallocation of buffer Y'; STOP
   END IF   
   DEALLOCATE( chk_dY, STAT=i )
   IF (i/=0) THEN
      PRINT*,'Failed deallocation of buffer dY'; STOP
   END IF   
   DEALLOCATE( chk_d2Y, STAT=i )
   IF (i/=0) THEN
      PRINT*,'Failed deallocation of buffer d2Y'; STOP
   END IF   
 
 END SUBROUTINE rk_FreeCBuffers

!~~~~~~~~~~~~~~~~~~~~~~~~~~~~~~~~~~~~~~~~~~~~~~~~~~~~~~~~~~~~~~~~~~~~~~~~~~~~
 SUBROUTINE rk_DPush( T, H, Y, Zstage, NewIt, E1, E2 )!, Jcb )
!~~~~~~~~~~~~~~~~~~~~~~~~~~~~~~~~~~~~~~~~~~~~~~~~~~~~~~~~~~~~~~~~~~~~~~~~~~~~
!~~~> Saves the next trajectory snapshot for discrete adjoints
!~~~~~~~~~~~~~~~~~~~~~~~~~~~~~~~~~~~~~~~~~~~~~~~~~~~~~~~~~~~~~~~~~~~~~~~~~~~~
   KPP_REAL :: T, H, Y(NVAR), Zstage(NVAR*3)
   INTEGER :: NewIt
#ifdef FULL_ALGEBRA      
   KPP_REAL :: E1(NVAR,NVAR)
   COMPLEX(kind=dp) :: E2(NVAR,NVAR)
   INTEGER :: i, j   
#else      
   KPP_REAL :: E1(LU_NONZERO)
   COMPLEX(kind=dp) :: E2(LU_NONZERO)   
#endif      

   stack_ptr = stack_ptr + 1
   IF ( stack_ptr > bufsize ) THEN
     PRINT*,'Push failed: buffer overflow'
     STOP
   END IF  
   chk_H( stack_ptr ) = H
   chk_T( stack_ptr ) = T
   ! CALL WCOPY(NVAR,Y,1,chk_Y(1,stack_ptr),1)
   ! CALL WCOPY(NVAR*3,Zstage,1,chk_Z(1,stack_ptr),1)
   chk_Y(1:N,stack_ptr) = Y(1:N)
   chk_Z(1:3*N,stack_ptr) = Zstage(1:3*N)
   chk_NiT( stack_ptr ) = NewIt
   IF (SaveLU) THEN 
#ifdef FULL_ALGEBRA      
     ! CALL WCOPY(NVAR*NVAR, E1,1,chk_E1(1,stack_ptr),1)
     ! CALL WCOPYCmplx(NVAR*NVAR, E2,1,chk_E2(1,stack_ptr),1)
     DO j=1,NVAR
       DO i=1,NVAR
         chk_E1(NVAR*(j-1)+i,stack_ptr) = E1(i,j)
         chk_E2(NVAR*(j-1)+i,stack_ptr) = E2(i,j)
       END DO
     END DO
#else      
     ! CALL WCOPY(LU_NONZERO, E1,1,chk_E1(1,stack_ptr),1)
     ! CALL WCOPYCmplx(LU_NONZERO, E2,1,chk_E2(1,stack_ptr),1)
     chk_E1(1:LU_NONZERO,stack_ptr) = E1(1:LU_NONZERO)
     chk_E2(1:LU_NONZERO,stack_ptr) = E2(1:LU_NONZERO)
#endif      
   END IF  
   !CALL WCOPY(LU_NONZERO,Jcb,1,chk_J(1,stack_ptr),1)
  
  END SUBROUTINE rk_DPush
  
   
!~~~~~~~~~~~~~~~~~~~~~~~~~~~~~~~~~~~~~~~~~~~~~~~~~~~~~~~~~~~~~~~~~~~~~~~~~~~~
  SUBROUTINE rk_DPop( T, H, Y, Zstage, NewIt, E1, E2 ) !, Jcb )
!~~~~~~~~~~~~~~~~~~~~~~~~~~~~~~~~~~~~~~~~~~~~~~~~~~~~~~~~~~~~~~~~~~~~~~~~~~~~
!~~~> Retrieves the next trajectory snapshot for discrete adjoints
!~~~~~~~~~~~~~~~~~~~~~~~~~~~~~~~~~~~~~~~~~~~~~~~~~~~~~~~~~~~~~~~~~~~~~~~~~~~~

   KPP_REAL :: T, H, Y(NVAR), Zstage(NVAR*3) ! , Jcb(LU_NONZERO)
   INTEGER :: NewIt
#ifdef FULL_ALGEBRA      
   KPP_REAL :: E1(NVAR,NVAR)
   COMPLEX(kind=dp) :: E2(NVAR,NVAR)   
   INTEGER :: i, j   
#else      
   KPP_REAL :: E1(LU_NONZERO)
   COMPLEX(kind=dp) :: E2(LU_NONZERO)   
#endif      
   
   IF ( stack_ptr <= 0 ) THEN
     PRINT*,'Pop failed: empty buffer'
     STOP
   END IF  
   H = chk_H( stack_ptr )
   T = chk_T( stack_ptr )
   ! CALL WCOPY(NVAR,chk_Y(1,stack_ptr),1,Y,1)
   Y(1:NVAR) = chk_Y(1:NVAR,stack_ptr)
   ! CALL WCOPY(NVAR*3,chk_Z(1,stack_ptr),1,Zstage,1)
   Zstage(1:3*NVAR) = chk_Z(1:3*NVAR,stack_ptr)
   NewIt = chk_NiT( stack_ptr )
   IF (SaveLU) THEN
#ifdef FULL_ALGEBRA      
     ! CALL WCOPY(NVAR*NVAR,chk_E1(1,stack_ptr),1, E1,1)
     ! CALL WCOPYCmplx(NVAR*NVAR,chk_E2(1,stack_ptr),1, E2,1)
     DO j=1,NVAR
       DO i=1,NVAR
         E1(i,j) = chk_E1(NVAR*(j-1)+i,stack_ptr)
         E2(i,j) = chk_E2(NVAR*(j-1)+i,stack_ptr)
       END DO
     END DO
#else      
     ! CALL WCOPY(LU_NONZERO,chk_E1(1,stack_ptr),1, E1,1)
     ! CALL WCOPYCmplx(LU_NONZERO,chk_E2(1,stack_ptr),1, E2,1)
     E1(1:LU_NONZERO) = chk_E1(1:LU_NONZERO,stack_ptr)
     E2(1:LU_NONZERO) = chk_E2(1:LU_NONZERO,stack_ptr)
#endif      
   END IF  
   !CALL WCOPY(LU_NONZERO,chk_J(1,stack_ptr),1,Jcb,1)

   stack_ptr = stack_ptr - 1
  
  END SUBROUTINE rk_DPop
 
!~~~~~~~~~~~~~~~~~~~~~~~~~~~~~~~~~~~~~~~~~~~~~~~~~~~~~~~~~~~~~~~~~~~~~~~~~~~~
  SUBROUTINE rk_CPush(T, H, Y, dY, d2Y )
!~~~~~~~~~~~~~~~~~~~~~~~~~~~~~~~~~~~~~~~~~~~~~~~~~~~~~~~~~~~~~~~~~~~~~~~~~~~~
!~~~> Saves the next trajectory snapshot for discrete adjoints
!~~~~~~~~~~~~~~~~~~~~~~~~~~~~~~~~~~~~~~~~~~~~~~~~~~~~~~~~~~~~~~~~~~~~~~~~~~~~

   KPP_REAL :: T, H, Y(NVAR), dY(NVAR), d2Y(NVAR)
   
   stack_ptr = stack_ptr + 1
   IF ( stack_ptr > bufsize ) THEN
     PRINT*,'Push failed: buffer overflow'
     STOP
   END IF  
   chk_H( stack_ptr ) = H
   chk_T( stack_ptr ) = T
   ! CALL WCOPY(NVAR,Y,1,chk_Y(1,stack_ptr),1)
   ! CALL WCOPY(NVAR,dY,1,chk_dY(1,stack_ptr),1)
   ! CALL WCOPY(NVAR,d2Y,1,chk_d2Y(1,stack_ptr),1)
   chk_Y(1:NVAR,stack_ptr)  =  Y(1:NVAR)
   chk_dY(1:NVAR,stack_ptr) = dY(1:NVAR)
   chk_d2Y(1:NVAR,stack_ptr)= d2Y(1:NVAR)
  
  END SUBROUTINE rk_CPush
  
   
!~~~~~~~~~~~~~~~~~~~~~~~~~~~~~~~~~~~~~~~~~~~~~~~~~~~~~~~~~~~~~~~~~~~~~~~~~~~~
  SUBROUTINE rk_CPop( T, H, Y, dY, d2Y )
!~~~~~~~~~~~~~~~~~~~~~~~~~~~~~~~~~~~~~~~~~~~~~~~~~~~~~~~~~~~~~~~~~~~~~~~~~~~~
!~~~> Retrieves the next trajectory snapshot for discrete adjoints
!~~~~~~~~~~~~~~~~~~~~~~~~~~~~~~~~~~~~~~~~~~~~~~~~~~~~~~~~~~~~~~~~~~~~~~~~~~~~

   KPP_REAL :: T, H, Y(NVAR), dY(NVAR), d2Y(NVAR)
   
   IF ( stack_ptr <= 0 ) THEN
     PRINT*,'Pop failed: empty buffer'
     STOP
   END IF  
   H = chk_H( stack_ptr )
   T = chk_T( stack_ptr )
   ! CALL WCOPY(NVAR,chk_Y(1,stack_ptr),1,Y,1)
   ! CALL WCOPY(NVAR,chk_dY(1,stack_ptr),1,dY,1)
   ! CALL WCOPY(NVAR,chk_d2Y(1,stack_ptr),1,d2Y,1)
     Y(1:NVAR) = chk_Y(1:NVAR,stack_ptr)
    dY(1:NVAR) = chk_dY(1:NVAR,stack_ptr)
   d2Y(1:NVAR) = chk_d2Y(1:NVAR,stack_ptr)

   stack_ptr = stack_ptr - 1
  
  END SUBROUTINE rk_CPop


!~~~~~~~~~~~~~~~~~~~~~~~~~~~~~~~~~~~~~~~~~~~~~~~~~~~~~~~~~~~~~~~~~~~
   SUBROUTINE RK_FwdIntegrator( N,Tstart,Tend,Y,AdjointType,IERR )
!~~~~~~~~~~~~~~~~~~~~~~~~~~~~~~~~~~~~~~~~~~~~~~~~~~~~~~~~~~~~~~~~~~~

      IMPLICIT NONE
!~~~> Arguments
      INTEGER,  INTENT(IN)         :: N
      KPP_REAL, INTENT(IN)    :: Tend, Tstart
      KPP_REAL, INTENT(INOUT) :: Y(N)
      INTEGER,  INTENT(OUT)        :: IERR
      INTEGER,  INTENT(IN)         :: AdjointType

!~~~> Local variables
#ifdef FULL_ALGEBRA
      KPP_REAL    :: FJAC(N,N), E1(N,N)
      COMPLEX(kind=dp) :: E2(N,N)   
#else
      KPP_REAL    :: FJAC(LU_NONZERO), E1(LU_NONZERO)
      COMPLEX(kind=dp) :: E2(LU_NONZERO)   
#endif                
      KPP_REAL, DIMENSION(N) :: Z1,Z2,Z3,Z4,SCAL,DZ1,DZ2,DZ3,DZ4,G,TMP,FCN0
      KPP_REAL  :: CONT(N,3), Tdirection,  H, T, Hacc, Hnew, Hold, Fac,  &
                 FacGus, Theta, Err, ErrOld, NewtonRate, NewtonIncrement,  &
                 Hratio, Qnewton, NewtonPredictedErr,NewtonIncrementOld, ThetaSD
      INTEGER :: IP1(N),IP2(N),NewtonIter, ISING, Nconsecutive, NewIt
      LOGICAL :: Reject, FirstStep, SkipJac, NewtonDone, SkipLU
      
      KPP_REAL, DIMENSION(:), POINTER :: Zstage
            
!~~~~~~~~~~~~~~~~~~~~~~~~~~~~~~~~~~~~~~
!~~~>  Initial setting
!~~~~~~~~~~~~~~~~~~~~~~~~~~~~~~~~~~~~~~
      IF (AdjointType == KPP_ROOT_discrete) THEN ! Save stage solution
        ALLOCATE(Zstage(N*3), STAT=i)
        IF (i/=0) THEN
          PRINT*,'Allocation of Zstage failed'
          STOP
        END IF
      END IF   
      T=Tstart

      Tdirection = SIGN(ONE,Tend-Tstart)
      H = MIN( MAX(ABS(Hmin),ABS(Hstart)) , Hmax )
      IF (ABS(H) <= 10.d0*Roundoff) H = 1.0d-6
      H = SIGN(H,Tdirection)
      Hold      = H
      Reject    = .FALSE.
      FirstStep = .TRUE.
      SkipJac   = .FALSE.
      SkipLU    = .FALSE.
      IF ((T+H*1.0001D0-Tend)*Tdirection >= ZERO) THEN
         H = Tend-T
      END IF
      Nconsecutive = 0
      CALL RK_ErrorScale(N,ITOL,AbsTol,RelTol,Y,SCAL)
!~~~~~~~~~~~~~~~~~~~~~~~~~~~~~~~~~~~~~~
!~~~>  Time loop begins
!~~~~~~~~~~~~~~~~~~~~~~~~~~~~~~~~~~~~~~
Tloop: DO WHILE ( (Tend-T)*Tdirection - Roundoff > ZERO )

      IF ( .NOT.SkipLU ) THEN ! This time around skip the Jac update and LU
        !~~~> Compute the Jacobian matrix
        IF ( .NOT.SkipJac ) THEN
          CALL JAC_CHEM(T,Y,FJAC)
          ISTATUS(ijac) = ISTATUS(ijac) + 1
        END IF
        !~~~> Compute the matrices E1 and E2 and their decompositions
        CALL RK_Decomp(N,H,FJAC,E1,IP1,E2,IP2,ISING)
        IF (ISING /= 0) THEN
          ISTATUS(isng) = ISTATUS(isng) + 1; Nconsecutive = Nconsecutive + 1
          IF (Nconsecutive >= 5) THEN
            CALL RK_ErrorMsg(-12,T,H,IERR); RETURN
          END IF
          H=H*0.5d0; Reject=.TRUE.; SkipJac = .TRUE.;  SkipLU = .FALSE.
          CYCLE Tloop
        ELSE
          Nconsecutive = 0    
        END IF   
      END IF ! SkipLU
   
      ISTATUS(istp) = ISTATUS(istp) + 1
      IF (ISTATUS(istp) > Max_no_steps) THEN
        PRINT*,'Max number of time steps is ',Max_no_steps
        CALL RK_ErrorMsg(-9,T,H,IERR); RETURN
      END IF
      IF (0.1D0*ABS(H) <= ABS(T)*Roundoff)  THEN
        CALL RK_ErrorMsg(-10,T,H,IERR); RETURN
      END IF
      
!~~~~~~~~~~~~~~~~~~~~~~~~~~~~~~~~~~~~~~~~~~~~~~~
!~~~>  Loop for the simplified Newton iterations
!~~~~~~~~~~~~~~~~~~~~~~~~~~~~~~~~~~~~~~~~~~~~~~~
            
      !~~~>  Starting values for Newton iteration
      IF ( FirstStep .OR. (.NOT.StartNewton) ) THEN
         CALL Set2zero(N,Z1)
         CALL Set2zero(N,Z2)
         CALL Set2zero(N,Z3)
      ELSE
         ! Evaluate quadratic polynomial
         CALL RK_Interpolate('eval',N,H,Hold,Z1,Z2,Z3,CONT)
      END IF
      
      !~~~>  Initializations for Newton iteration
      NewtonDone = .FALSE.
      Fac = 0.5d0 ! Step reduction if too many iterations
      
NewtonLoop:DO  NewtonIter = 1, NewtonMaxit  
 
            !~~~> Prepare the right-hand side
            CALL RK_PrepareRHS(N,T,H,Y,Z1,Z2,Z3,DZ1,DZ2,DZ3)
            
            !~~~> Solve the linear systems
            CALL RK_Solve( N,H,E1,IP1,E2,IP2,DZ1,DZ2,DZ3,ISING )


            NewtonIncrement = SQRT( ( RK_ErrorNorm(N,SCAL,DZ1)**2 + &
                                RK_ErrorNorm(N,SCAL,DZ2)**2 + &
                                RK_ErrorNorm(N,SCAL,DZ3)**2 )/3.0d0 )
            
            IF ( NewtonIter == 1 ) THEN
                Theta      = ABS(ThetaMin)
                NewtonRate = 2.0d0 
            ELSE
                Theta = NewtonIncrement/NewtonIncrementOld
                IF (Theta < 0.99d0) THEN
                    NewtonRate = Theta/(ONE-Theta)
                ELSE ! Non-convergence of Newton: Theta too large
                    EXIT NewtonLoop
                END IF
                IF ( NewtonIter < NewtonMaxit ) THEN 
                  ! Predict error at the end of Newton process 
                  NewtonPredictedErr = NewtonIncrement &
                               *Theta**(NewtonMaxit-NewtonIter)/(ONE-Theta)
                  IF (NewtonPredictedErr >= NewtonTol) THEN
                    ! Non-convergence of Newton: predicted error too large
                    Qnewton = MIN(10.0d0,NewtonPredictedErr/NewtonTol)
                    Fac=0.8d0*Qnewton**(-ONE/(1+NewtonMaxit-NewtonIter))
                    EXIT NewtonLoop
                  END IF
                END IF
            END IF

            NewtonIncrementOld = MAX(NewtonIncrement,Roundoff) 
            ! Update solution
            CALL WAXPY(N,-ONE,DZ1,1,Z1,1) ! Z1 <- Z1 - DZ1
            CALL WAXPY(N,-ONE,DZ2,1,Z2,1) ! Z2 <- Z2 - DZ2
            CALL WAXPY(N,-ONE,DZ3,1,Z3,1) ! Z3 <- Z3 - DZ3
            
            ! Check error in Newton iterations
            NewtonDone = (NewtonRate*NewtonIncrement <= NewtonTol)
            IF (NewtonDone) THEN
	      NewIt = NewtonIter
	      EXIT NewtonLoop
	    END IF  
   	    IF (NewtonIter == NewtonMaxit) THEN
		PRINT*, 'Slow or no convergence in Newton Iteration: Max no. of', &
		 	'Newton iterations reached'
	    END IF

      END DO NewtonLoop

            
      IF (.NOT.NewtonDone) THEN
           !CALL RK_ErrorMsg(-12,T,H,IERR);
           H = Fac*H; Reject=.TRUE.; SkipJac = .TRUE.;  SkipLU = .FALSE.
	   ISTATUS(irej) = ISTATUS(irej) + 1
           CYCLE Tloop
      END IF

!~~~~~~~~~~~~~~~~~~~~~~~~~~~~
!~~~> SDIRK Stage
!~~~~~~~~~~~~~~~~~~~~~~~~~~~~
      IF (SdirkError) THEN

!~~~>  Starting values for Newton iterations
       Z4(1:N) = Z3(1:N)
       
!~~~>   Prepare the loop-independent part of the right-hand side
       CALL FUN_CHEM(T,Y,DZ4)
       ISTATUS(Nfun) = ISTATUS(Nfun) + 1
       
!       G = H*rkBgam(0)*DZ4 + rkTheta(1)*Z1 + rkTheta(2)*Z2 + rkTheta(3)*Z3
       CALL Set2Zero(N, G)
       CALL WAXPY(N,rkBgam(0)*H, DZ4,1,G,1) 
       CALL WAXPY(N,rkTheta(1),Z1,1,G,1)
       CALL WAXPY(N,rkTheta(2),Z2,1,G,1)
       CALL WAXPY(N,rkTheta(3),Z3,1,G,1)

       !~~~>  Initializations for Newton iteration
       NewtonDone = .FALSE.
       Fac = 0.5d0 ! Step reduction factor if too many iterations
            
SDNewtonLoop:DO NewtonIter = 1, NewtonMaxit

!~~~>   Prepare the loop-dependent part of the right-hand side
	    CALL WADD(N,Y,Z4,TMP)         ! TMP <- Y + Z4
	    CALL FUN_CHEM(T+H,TMP,DZ4) 	  ! DZ4 <- Fun(Y+Z4)         
            ISTATUS(Nfun) = ISTATUS(Nfun) + 1
!            DZ4(1:N) = (G(1:N)-Z4(1:N))*(rkGamma/H) + DZ4(1:N)
	    CALL WAXPY (N, -ONE*rkGamma/H, Z4, 1, DZ4, 1)
            CALL WAXPY (N, rkGamma/H, G,1, DZ4,1)

!~~~>   Solve the linear system
#ifdef FULL_ALGEBRA  
            CALL DGETRS( 'N', N, 1, E1, N, IP1, DZ4, N, ISING )
#else
            CALL KppSolve(E1, DZ4)
#endif
            
!~~~>   Check convergence of Newton iterations
            NewtonIncrement = RK_ErrorNorm(N,SCAL,DZ4)
            IF ( NewtonIter == 1 ) THEN
                ThetaSD      = ABS(ThetaMin)
                NewtonRate = 2.0d0 
            ELSE
                ThetaSD = NewtonIncrement/NewtonIncrementOld
                IF (ThetaSD < 0.99d0) THEN
                    NewtonRate = ThetaSD/(ONE-ThetaSD)
                    ! Predict error at the end of Newton process 
                    NewtonPredictedErr = NewtonIncrement &
                               *ThetaSD**(NewtonMaxit-NewtonIter)/(ONE-ThetaSD)
                    IF (NewtonPredictedErr >= NewtonTol) THEN
                      ! Non-convergence of Newton: predicted error too large
                      !print*,'Error too large: ', NewtonPredictedErr
                      Qnewton = MIN(10.0d0,NewtonPredictedErr/NewtonTol)
                      Fac = 0.8d0*Qnewton**(-ONE/(1+NewtonMaxit-NewtonIter))
                      EXIT SDNewtonLoop
                    END IF
                ELSE ! Non-convergence of Newton: ThetaSD too large
                    !print*,'Theta too large: ',ThetaSD
                    EXIT SDNewtonLoop
                END IF
            END IF
            NewtonIncrementOld = NewtonIncrement
            ! Update solution: Z4 <-- Z4 + DZ4
            CALL WAXPY(N,ONE,DZ4,1,Z4,1) 
            
            ! Check error in Newton iterations
            NewtonDone = (NewtonRate*NewtonIncrement <= NewtonTol)
            IF (NewtonDone) EXIT SDNewtonLoop
            
            END DO SDNewtonLoop
            
            IF (.NOT.NewtonDone) THEN
                H = Fac*H; Reject=.TRUE.; SkipJac = .TRUE.;  SkipLU = .FALSE.
                CYCLE Tloop
            END IF
      END IF
!~~~>  End of implified SDIRK Newton iterations

            
!~~~~~~~~~~~~~~~~~~~~~~~~~~~~~~~~~~~~~~~~~~~~~~~
!~~~> Error estimation
!~~~~~~~~~~~~~~~~~~~~~~~~~~~~~~~~~~~~~~~~~~~~~~~
      IF (SdirkError) THEN
!         DZ4(1:N) =  rkD(1)*Z1 + rkD(2)*Z2 + rkD(3)*Z3 - Z4    
	 CALL Set2Zero(N, DZ4)
	 IF (rkD(1) /= ZERO) CALL WAXPY(N, rkD(1), Z1, 1, DZ4, 1)
	 IF (rkD(2) /= ZERO) CALL WAXPY(N, rkD(2), Z2, 1, DZ4, 1)
	 IF (rkD(3) /= ZERO) CALL WAXPY(N, rkD(3), Z3, 1, DZ4, 1)
	 CALL WAXPY(N, -ONE, Z4, 1, DZ4, 1)
         Err = RK_ErrorNorm(N,SCAL,DZ4)    
      ELSE
         CALL  RK_ErrorEstimate(N,H,Y,T, &
               E1,IP1,Z1,Z2,Z3,SCAL,Err,FirstStep,Reject)
      END IF
!~~~> Computation of new step size Hnew
      Fac  = Err**(-ONE/rkELO)*          &
             MIN(FacSafe,(ONE+2*NewtonMaxit)/(NewtonIter+2*NewtonMaxit))
      Fac  = MIN(FacMax,MAX(FacMin,Fac))
      Hnew = Fac*H

!~~~~~~~~~~~~~~~~~~~~~~~~~~~~~~~~~~~~~~~~~~~~~~~
!~~~> Accept/reject step 
!~~~~~~~~~~~~~~~~~~~~~~~~~~~~~~~~~~~~~~~~~~~~~~~
accept:IF (Err < ONE) THEN !~~~> STEP IS ACCEPTED
         IF (AdjointType == KPP_ROOT_discrete) THEN ! Save stage solution
            ! CALL WCOPY(N,Z1,1,Zstage(1),1)
            ! CALL WCOPY(N,Z2,1,Zstage(N+1),1)
            ! CALL WCOPY(N,Z3,1,Zstage(2*N+1),1)
            Zstage(1:N)       = Z1(1:N) 
            Zstage(N+1:2*N)   = Z2(1:N)
            Zstage(2*N+1:3*N) = Z3(1:N)
	    ! Push old Y - Y at the beginning of the stage
            CALL rk_DPush(T, H, Y, Zstage, NewIt, E1, E2)
         END IF

         FirstStep=.FALSE.
         ISTATUS(iacc) = ISTATUS(iacc) + 1
         IF (Gustafsson) THEN
            !~~~> Predictive controller of Gustafsson
            IF (ISTATUS(iacc) > 1) THEN
               FacGus=FacSafe*(H/Hacc)*(Err**2/ErrOld)**(-0.25d0)
               FacGus=MIN(FacMax,MAX(FacMin,FacGus))
               Fac=MIN(Fac,FacGus)
               Hnew = Fac*H
            END IF
            Hacc=H
            ErrOld=MAX(1.0d-2,Err)
         END IF
         Hold = H
         T = T+H 
         ! Update solution: Y <- Y + sum (d_i Z_i)
         IF (rkD(1) /= ZERO) CALL WAXPY(N,rkD(1),Z1,1,Y,1)
         IF (rkD(2) /= ZERO) CALL WAXPY(N,rkD(2),Z2,1,Y,1)
         IF (rkD(3) /= ZERO) CALL WAXPY(N,rkD(3),Z3,1,Y,1)
         ! Construct the solution quadratic interpolant Q(c_i) = Z_i, i=1:3
         IF (StartNewton) CALL RK_Interpolate('make',N,H,Hold,Z1,Z2,Z3,CONT)
         CALL RK_ErrorScale(N,ITOL,AbsTol,RelTol,Y,SCAL)
         RSTATUS(itexit) = T
         RSTATUS(ihnew)  = Hnew
         RSTATUS(ihacc)  = H
         Hnew = Tdirection*MIN( MAX(ABS(Hnew),Hmin) , Hmax )
         IF (Reject) Hnew = Tdirection*MIN(ABS(Hnew),ABS(H))
         Reject = .FALSE.
         IF ((T+Hnew/Qmin-Tend)*Tdirection >=  ZERO) THEN
            H = Tend-T
         ELSE
            Hratio=Hnew/H
            ! Reuse the LU decomposition
            SkipLU = (Theta<=ThetaMin) .AND. (Hratio>=Qmin) .AND. (Hratio<=Qmax)
	    SkipLU = .false.
            IF (.NOT.SkipLU) H=Hnew
         END IF
         ! If convergence is fast enough, do not update Jacobian
         ! SkipJac = (Theta <= ThetaMin)
         SkipJac = .FALSE.

      ELSE accept !~~~> Step is rejected
         IF (FirstStep .OR. Reject) THEN
             H = FacRej*H
         ELSE
             H = Hnew
         END IF
         Reject   = .TRUE.
         SkipJac  = .TRUE.
         SkipLU   = .FALSE. 
         IF (ISTATUS(iacc) >= 1) ISTATUS(irej) = ISTATUS(irej) + 1
      END IF accept
      
    END DO Tloop

!~~~> Save last state: only needed for continuous adjoint
   IF ( (AdjointType == KPP_ROOT_continuous) .OR. &
       (AdjointType == KPP_ROOT_simple_continuous) ) THEN
       CALL Fun_Chem(T,Y,Fcn0)
       CALL rk_CPush( T, H, Y, Fcn0, DZ3)
!~~~> Deallocate stage buffer: only needed for discrete adjoint
   ELSEIF (AdjointType == KPP_ROOT_discrete) THEN 
        DEALLOCATE(Zstage, STAT=i)
        IF (i/=0) THEN
          PRINT*,'Deallocation of Zstage failed'
          STOP
        END IF
   END IF   
   
    ! Successful exit
    IERR = 1  

 END SUBROUTINE RK_FwdIntegrator


!~~~~~~~~~~~~~~~~~~~~~~~~~~~~~~~~~~~~~~~~~~~~~~~~~~~~~~~~~~~~~~~~~~~
 SUBROUTINE rk_DadjInt( NADJ,Lambda,Tstart,Tend,T,IERR )
!~~~~~~~~~~~~~~~~~~~~~~~~~~~~~~~~~~~~~~~~~~~~~~~~~~~~~~~~~~~~~~~~~~~

      IMPLICIT NONE
!~~~> Arguments
!~~~> Input: the initial condition at Tstart; Output: the solution at T   
      INTEGER, INTENT(IN)     :: NADJ
!~~~> First order adjoint   
      KPP_REAL, INTENT(INOUT) :: Lambda(N,NADJ)
      KPP_REAL, INTENT(IN)    :: Tstart, Tend
      KPP_REAL, INTENT(INOUT) :: T
      INTEGER,  INTENT(OUT)        :: IERR

!~~~> Local variables
#ifdef FULL_ALGEBRA
      KPP_REAL    :: Jac0(N,N), Jac1(N,N),Jac2(N,N),Jac3(N,N), E1(N,N)
      COMPLEX(kind=dp) :: E2(N,N)   
      KPP_REAL    :: Jbig(3*N,3*N), X(3*N)
      INTEGER          :: IPbig(3*N)
#else
      KPP_REAL, DIMENSION(LU_NONZERO) :: Jac0, Jac1, Jac2, Jac3, E1
      COMPLEX(kind=dp), DIMENSION(LU_NONZERO) :: E2   
      ! Next two lines for sparse big algebra:
      ! KPP_REAL :: Jbig(3,3,LU_NONZERO), X(3,N)
      ! INTEGER :: IPbig(3,N)
      KPP_REAL :: Jbig(3*N,3*N), X(3*N)
      INTEGER :: IPbig(3*N)
#endif                
      KPP_REAL, DIMENSION(N,NADJ) :: U1,U2,U3
      KPP_REAL, DIMENSION(N) :: SCAL,DU1,DU2,DU3
      KPP_REAL :: Y(N), Zstage(3*N)
      KPP_REAL  :: H, NewtonRate, NewtonIncrement, NewtonIncrementOld
      INTEGER :: IP1(N),IP2(N),NewtonIter, ISING, iadj, NewIt
      LOGICAL :: Reject, NewtonDone, NewtonConverge
      KPP_REAL :: T1, Theta
      KPP_REAL, DIMENSION(N) :: TMP, G1, G2, G3
      INTEGER :: info, i, j
            
!~~~~~~~~~~~~~~~~~~~~~~~~~~~~~~~~~~~~~~
!~~~>  Initial setting
!~~~~~~~~~~~~~~~~~~~~~~~~~~~~~~~~~~~~~~
      T1 = Tend      
!      Tdirection = SIGN(ONE,Tend-Tstart)
      NewtonConverge = .TRUE.
      Reject = .FALSE.
      
!~~~> Time loop begins below 
TimeLoop:DO WHILE ( stack_ptr > 0 )

   IF (.not.Reject) THEN
   
     !~~~>  Recover checkpoints for stage values and vectors
     CALL rk_DPop(T, H, Y, Zstage, NewIt, E1, E2)

     !~~~>  Compute LU decomposition 
     IF (.NOT.SaveLU) THEN
        !~~~> Compute the Jacobian matrix
        CALL JAC_CHEM(T,Y,Jac0)
        ISTATUS(ijac) = ISTATUS(ijac) + 1
        !~~~> Compute the matrices E1 and E2 and their decompositions
        CALL RK_Decomp(N,H,Jac0,E1,IP1,E2,IP2,ISING)
     END IF
   
     !~~~>   Jacobian values at stage vectors
     CALL WADD(N,Y,Zstage(1),TMP)       ! TMP  <- Y + Z1
     CALL JAC_CHEM(T+rkC(1)*H,TMP,Jac1) ! Jac1 <- Jac(Y+Z1)  
     CALL WADD(N,Y,Zstage(1+N),TMP)     ! TMP  <- Y + Z2
     CALL JAC_CHEM(T+rkC(2)*H,TMP,Jac2) ! Jac2 <- Jac(Y+Z2)  
     CALL WADD(N,Y,Zstage(1+2*N),TMP)   ! TMP  <- Y + Z3
     CALL JAC_CHEM(T+rkC(3)*H,TMP,Jac3) ! Jac3 <- Jac(Y+Z3)
      
   END IF ! .not.Reject

111 CONTINUE

   IF ( (AdjointSolve == Solve_adaptive .and. .not.NewtonConverge) &
         .or. (AdjointSolve == Solve_direct) ) THEN
#ifdef FULL_ALGEBRA  
       DO j=1,N
         DO i=1,N
          Jbig(i,j)         = -H*rkA(1,1)*Jac1(i,j)
          Jbig(N+i,j)       = -H*rkA(2,1)*Jac1(i,j)
          Jbig(2*N+i,j)     = -H*rkA(3,1)*Jac1(i,j)
          Jbig(i,N+j)       = -H*rkA(1,2)*Jac2(i,j)
          Jbig(N+i,N+j)     = -H*rkA(2,2)*Jac2(i,j)
          Jbig(2*N+i,N+j)   = -H*rkA(3,2)*Jac2(i,j)
          Jbig(i,2*N+j)     = -H*rkA(1,3)*Jac3(i,j)
          Jbig(N+i,2*N+j)   = -H*rkA(2,3)*Jac3(i,j)
          Jbig(2*N+i,2*N+j) = -H*rkA(3,3)*Jac3(i,j)
         END DO  
       END DO
       DO i=1,3*N
	  Jbig(i,i) = Jbig(i,i) + ONE
       END DO
       CALL DGETRF(3*N,3*N,Jbig,3*N,IPbig,info) 
       ! CALL WGEFA(3*N,Jbig,IPbig,info) 
       IF (info /= 0) THEN
         PRINT*,'Big guy is singular'; STOP
       END IF 
#else    
!  Commented lines for sparse big algebra:    
!      !~~~>  Construct the big Jacobian
!      DO j=1,LU_NONZERO
!        DO i=1,3
!          Jbig(i,1,j) = -H*rkA(i,1)*Jac1(j)
!          Jbig(i,2,j) = -H*rkA(i,2)*Jac2(j)
!          Jbig(i,3,j) = -H*rkA(i,3)*Jac3(j)
!        END DO
!      END DO
!      DO j=1,NVAR
!        DO i=1,3
!          Jbig(i,i,LU_DIAG(j)) = ONE + Jbig(i,i,LU_DIAG(j))
!        END DO
!      END DO
!      !~~~>  Solve the big system
!      CALL KppDecompBig( Jbig, IPbig, info )
!  Use full big algebra:    
      Jbig(1:3*N,1:3*N) = 0.0d0
      DO i=1,LU_NONZERO
	  Jbig(LU_irow(i),LU_icol(i))         = -H*rkA(1,1)*Jac1(i)
	  Jbig(LU_irow(i),N+LU_icol(i))       = -H*rkA(1,2)*Jac2(i)
	  Jbig(LU_irow(i),2*N+LU_icol(i))     = -H*rkA(1,3)*Jac3(i)
	  Jbig(N+LU_irow(i),LU_icol(i))       = -H*rkA(2,1)*Jac1(i)
	  Jbig(N+LU_irow(i),N+LU_icol(i))     = -H*rkA(2,2)*Jac2(i)
	  Jbig(N+LU_irow(i),2*N+LU_icol(i))   = -H*rkA(2,3)*Jac3(i)
	  Jbig(2*N+LU_irow(i),LU_icol(i))     = -H*rkA(3,1)*Jac1(i)
	  Jbig(2*N+LU_irow(i),N+LU_icol(i))   = -H*rkA(3,2)*Jac2(i)
	  Jbig(2*N+LU_irow(i),2*N+LU_icol(i)) = -H*rkA(3,3)*Jac3(i)
      END DO
      DO i=1, 3*N
	 Jbig(i,i) = ONE + Jbig(i,i)
      END DO
      ! CALL DGETRF(3*N,3*N,Jbig,3*N,IPbig,info) 
      CALL WGEFA(3*N,Jbig,IPbig,info) 
      IF (info /= 0) THEN
         PRINT*,'Big guy is singular'; STOP
      END IF
#endif        
    END IF
      
!~~~~~~~~~~~~~~~~~~~~~~~~~~~~~~~~~~~~~~~~~~~~~~~
!~~~>  Loop for the simplified Newton iterations
!~~~~~~~~~~~~~~~~~~~~~~~~~~~~~~~~~~~~~~~~~~~~~~~
Adj:DO iadj = 1, NADJ      
      !~~~>  Starting values for Newton iteration
      ! CALL WCOPY(N,Lambda(1,iadj),1,U1(1,iadj),1)
      ! CALL WCOPY(N,Lambda(1,iadj),1,U2(1,iadj),1)
      ! CALL WCOPY(N,Lambda(1,iadj),1,U3(1,iadj),1)
      CALL Set2Zero(N,U1(1,iadj))
      CALL Set2Zero(N,U2(1,iadj))
      CALL Set2Zero(N,U3(1,iadj))
      
      !~~~>  Initializations for Newton iteration
      NewtonDone = .FALSE.
      !~~~>    Right Hand Side - part G for all Newton iterations
      CALL RK_PrepareRHS_G(N,H,Jac1,Jac2,Jac3,Lambda(1,iadj), 	      &
      			G1, G2, G3)
			
      IF ( (AdjointSolve == Solve_adaptive .and. NewtonConverge)      &
            .or. (AdjointSolve == Solve_fixed) ) THEN

NewtonLoopAdj:DO  NewtonIter = 1, NewtonMaxit  

            !~~~> Prepare the right-hand side
            CALL RK_PrepareRHS_Adj(N,H,Jac1,Jac2,Jac3,Lambda(1,iadj), &
	    		U1(1,iadj),U2(1,iadj),U3(1,iadj),	      &
			G1, G2, G3, DU1,DU2,DU3)

            !~~~> Solve the linear systems
            CALL RK_SolveTR( N,H,E1,IP1,E2,IP2,DU1,DU2,DU3,ISING )

!~~~> The following code performs an adaptive number of Newton
!     iterations for solving adjoint system
            IF (AdjointSolve == Solve_adaptive) THEN

            CALL RK_ErrorScale(N,ITOL,                      &
                 AbsTol_adj(1:N,iadj),RelTol_adj(1:N,iadj), &
                 Lambda(1:N,iadj),SCAL)

	    ! SCAL(1:N) = 1.0d0
            NewtonIncrement = SQRT( ( RK_ErrorNorm(N,SCAL,DU1)**2 +   &
                                RK_ErrorNorm(N,SCAL,DU2)**2 +         &
                                RK_ErrorNorm(N,SCAL,DU3)**2 )/3.0d0 )
            
	
            IF ( NewtonIter == 1 ) THEN
                Theta      = ABS(ThetaMin)
                NewtonRate = 2.0d0 
            ELSE
                Theta = NewtonIncrement/NewtonIncrementOld
                IF (Theta < 0.99d0) THEN
                    NewtonRate = Theta/(ONE-Theta)
                ELSE ! Non-convergence of Newton: Theta too large
		    Reject = .TRUE.
		    NewtonDone = .FALSE.
                    EXIT NewtonLoopAdj
                END IF

            END IF
	  
            NewtonIncrementOld = MAX(NewtonIncrement,Roundoff) 

            END IF ! (AdjointSolve == Solve_adaptive)
            
            ! Update solution
            CALL WAXPY(N,-ONE,DU1,1,U1(1,iadj),1) ! U1 <- U1 - DU1
            CALL WAXPY(N,-ONE,DU2,1,U2(1,iadj),1) ! U2 <- U2 - DU2
            CALL WAXPY(N,-ONE,DU3,1,U3(1,iadj),1) ! U3 <- U3 - DU3

            IF (AdjointSolve == Solve_adaptive) THEN
            ! When performing an adaptive number of iterations
            !       check the error in Newton iterations
               NewtonDone = (NewtonRate*NewtonIncrement <= NewtonTol)
               IF ((NewtonDone).and.(NewtonIter>NewIt+1)) EXIT NewtonLoopAdj
            ELSE IF (AdjointSolve == Solve_fixed) THEN
               IF (NewtonIter>MAX(NewIt+1,6)) EXIT NewtonLoopAdj
            END IF   
            
      END DO NewtonLoopAdj
      
      IF ((AdjointSolve==Solve_adaptive).AND.(.NOT.NewtonDone)) THEN
         ! print*,'Newton iterations do not converge, switching to full system.'
	 NewtonConverge = .FALSE.
	 Reject = .TRUE.
	 GOTO 111
      END IF
      
      ! Update adjoint solution: Y_adj <- Y_adj + sum (U_i)
      CALL WAXPY(N,ONE,U1(1,iadj),1,Lambda(1,iadj),1)
      CALL WAXPY(N,ONE,U2(1,iadj),1,Lambda(1,iadj),1)
      CALL WAXPY(N,ONE,U3(1,iadj),1,Lambda(1,iadj),1)

      ELSE ! NewtonConverge = .false.

#ifdef FULL_ALGEBRA  
	X(1:N)       = -G1(1:N)
	X(N+1:2*N)   = -G2(1:N)
	X(2*N+1:3*N) = -G3(1:N)
	CALL DGETRS('T',3*N,1,Jbig,3*N,IPbig,X,3*N,0) 
        ! CALL WGESL('T',3*N,Jbig,IPbig,X)
	Lambda(1:N,iadj) = Lambda(1:N,iadj)+X(1:N)+X(N+1:2*N)+X(2*N+1:3*N)
#else        
!   Commented lines for sparse big algebra:
!	X(1,1:N) = -G1(1:N)
!	X(2,1:N) = -G2(1:N)
!	X(3,1:N) = -G3(1:N)
!	CALL KppSolveBigTR( Jbig, IPbig, X )                
!	Lambda(1:N,iadj) = Lambda(1:N,iadj)+X(1,1:N)+X(2,1:N)+X(3,1:N)
!   Use fill big algebra:
	X(1:N)       = -G1(1:N)
	X(N+1:2*N)   = -G2(1:N)
	X(2*N+1:3*N) = -G3(1:N)
	! CALL DGETRS('T',3*N,1,Jbig,3*N,IPbig,X,3*N,0) 
        CALL WGESL('T',3*N,Jbig,IPbig,X)
	Lambda(1:N,iadj) = Lambda(1:N,iadj)+X(1:N)+X(N+1:2*N)+X(2*N+1:3*N)
#endif        
        IF ((AdjointSolve==Solve_adaptive).AND.(iadj>=NADJ)) THEN
	  NewtonConverge = .TRUE.
	  Reject = .FALSE.
        END IF
     
     END IF ! NewtonConverge
 
   END DO Adj
   
   T1 = T1-H
      
   END DO TimeLoop
   
    ! Successful exit
    IERR = 1  

 END SUBROUTINE RK_DadjInt


!~~~~~~~~~~~~~~~~~~~~~~~~~~~~~~~~~~~~~~~~~~~~~~~~~~~~~~~~~~~~~~~~~~~~~~~~~~~~
 SUBROUTINE rk_CadjInt (                        &
        NADJ, Y,                                &
        Tstart, Tend, T, IERR)
!~~~~~~~~~~~~~~~~~~~~~~~~~~~~~~~~~~~~~~~~~~~~~~~~~~~~~~~~~~~~~~~~~~~~~~~~~~~~
      IMPLICIT NONE
!~~~> Arguments
!~~~> Input: the initial condition at Tstart; Output: the solution at T   
      INTEGER, INTENT(IN)     :: NADJ
!~~~> First order adjoint   
      KPP_REAL, INTENT(INOUT) :: Y(N,NADJ)
      KPP_REAL, INTENT(IN)    :: Tstart, Tend
      KPP_REAL, INTENT(INOUT) :: T
      INTEGER,  INTENT(OUT)        :: IERR

  END SUBROUTINE rk_CadjInt

!~~~~~~~~~~~~~~~~~~~~~~~~~~~~~~~~~~~~~~~~~~~~~~~~~~~~~~~~~~~~~~~~~~~~~~~~~~~~
 SUBROUTINE rk_SimpleCadjInt (                  &
        NADJ, Y,                                &
        Tstart, Tend, T,                        &
        IERR )
!~~~~~~~~~~~~~~~~~~~~~~~~~~~~~~~~~~~~~~~~~~~~~~~~~~~~~~~~~~~~~~~~~~~~~~~~~~~~
      IMPLICIT NONE
!~~~> Arguments
!~~~> Input: the initial condition at Tstart; Output: the solution at T   
      INTEGER, INTENT(IN)     :: NADJ
!~~~> First order adjoint   
      KPP_REAL, INTENT(INOUT) :: Y(N,NADJ)
      KPP_REAL, INTENT(IN)    :: Tstart, Tend
      KPP_REAL, INTENT(INOUT) :: T
      INTEGER,  INTENT(OUT)        :: IERR

  END SUBROUTINE rk_SimpleCadjInt


!~~~~~~~~~~~~~~~~~~~~~~~~~~~~~~~~~~~~~~~~~~~~~~~~~~~~~~~~~
 SUBROUTINE RK_ErrorMsg(Code,T,H,IERR)
!~~~~~~~~~~~~~~~~~~~~~~~~~~~~~~~~~~~~~~~~~~~~~~~~~~~~~~~~~
!    Handles all error messages
!~~~~~~~~~~~~~~~~~~~~~~~~~~~~~~~~~~~~~~~~~~~~~~~~~~~~~~~~~

   IMPLICIT NONE
   KPP_REAL, INTENT(IN) :: T, H
   INTEGER, INTENT(IN)  :: Code
   INTEGER, INTENT(OUT) :: IERR

   IERR = Code
   PRINT * , &
     'Forced exit from RungeKutta due to the following error:'


   SELECT CASE (Code)
    CASE (-1)
      PRINT * , '--> Improper value for maximal no of steps'
    CASE (-2)
      PRINT * , '--> Improper value for maximal no of Newton iterations'
    CASE (-3)
      PRINT * , '--> Hmin/Hmax/Hstart must be positive'
    CASE (-4)
      PRINT * , '--> Improper values for FacMin/FacMax/FacSafe/FacRej'
    CASE (-5)
      PRINT * , '--> Improper value for ThetaMin'
    CASE (-6)
      PRINT * , '--> Newton stopping tolerance too small'
    CASE (-7)
      PRINT * , '--> Improper values for Qmin, Qmax'
    CASE (-8)
      PRINT * , '--> Tolerances are too small'
    CASE (-9)
      PRINT * , '--> No of steps exceeds maximum bound'
    CASE (-10)
      PRINT * , '--> Step size too small: T + 10*H = T', &
            ' or H < Roundoff'
    CASE (-11)
      PRINT * , '--> Matrix is repeatedly singular'
    CASE (-12)
      PRINT * , '--> Non-convergence of Newton iterations'
    CASE (-13)
      PRINT * , '--> Requested RK method not implemented'
    CASE DEFAULT
      PRINT *, 'Unknown Error code: ', Code
   END SELECT

   WRITE(6,FMT="(5X,'T=',E12.5,'  H=',E12.5)") T, H 

 END SUBROUTINE RK_ErrorMsg


!~~~~~~~~~~~~~~~~~~~~~~~~~~~~~~~~~~~~~~~~~~~~~~~~~~~~~~~~~
 SUBROUTINE RK_ErrorScale(N,ITOL,AbsTol,RelTol,Y,SCAL)
!~~~~~~~~~~~~~~~~~~~~~~~~~~~~~~~~~~~~~~~~~~~~~~~~~~~~~~~~~
!    Handles all error messages
!~~~~~~~~~~~~~~~~~~~~~~~~~~~~~~~~~~~~~~~~~~~~~~~~~~~~~~~~~
   IMPLICIT NONE
   INTEGER, INTENT(IN)  :: N, ITOL
   KPP_REAL, INTENT(IN) :: AbsTol(*), RelTol(*), Y(N)
   KPP_REAL, INTENT(OUT) :: SCAL(N)
   INTEGER :: i
   
   IF (ITOL==0) THEN
       DO i=1,N
          SCAL(i)= ONE/(AbsTol(1)+RelTol(1)*ABS(Y(i)))
       END DO
   ELSE
       DO i=1,N
          SCAL(i)=ONE/(AbsTol(i)+RelTol(i)*ABS(Y(i)))
       END DO
   END IF
      
 END SUBROUTINE RK_ErrorScale


!!~~~~~~~~~~~~~~~~~~~~~~~~~~~~~~~~~~~~~~~~~~~~~~~~~~~~~~~~~
!  SUBROUTINE RK_Transform(N,Tr,Z1,Z2,Z3,W1,W2,W3)
!!~~~>                 W <-- Tr x Z
!!~~~~~~~~~~~~~~~~~~~~~~~~~~~~~~~~~~~~~~~~~~~~~~~~~~~~~~~~~
!      IMPLICIT NONE
!      INTEGER :: N, i
!      KPP_REAL :: Tr(3,3),Z1(N),Z2(N),Z3(N),W1(N),W2(N),W3(N)
!      KPP_REAL :: x1, x2, x3
!      DO i=1,N
!          x1 = Z1(i); x2 = Z2(i); x3 = Z3(i)
!          W1(i) = Tr(1,1)*x1 + Tr(1,2)*x2 + Tr(1,3)*x3
!          W2(i) = Tr(2,1)*x1 + Tr(2,2)*x2 + Tr(2,3)*x3
!          W3(i) = Tr(3,1)*x1 + Tr(3,2)*x2 + Tr(3,3)*x3
!      END DO
!  END SUBROUTINE RK_Transform
 
!~~~~~~~~~~~~~~~~~~~~~~~~~~~~~~~~~~~~~~~~~~~~~~~~~~~~~~~~~
  SUBROUTINE RK_Interpolate(action,N,H,Hold,Z1,Z2,Z3,CONT)
!~~~>   Constructs or evaluates a quadratic polynomial
!         that interpolates the Z solution at current step
!         and provides starting values for the next step
!~~~~~~~~~~~~~~~~~~~~~~~~~~~~~~~~~~~~~~~~~~~~~~~~~~~~~~~~~
      INTEGER :: N, i
      KPP_REAL :: H,Hold,Z1(N),Z2(N),Z3(N),CONT(N,3)
      KPP_REAL :: r, x1, x2, x3, den
      CHARACTER(LEN=4) :: action
       
      SELECT CASE (action) 
      CASE ('make')
         ! Construct the solution quadratic interpolant Q(c_i) = Z_i, i=1:3
         den = (rkC(3)-rkC(2))*(rkC(2)-rkC(1))*(rkC(1)-rkC(3))
         DO i=1,N
             CONT(i,1)=(-rkC(3)**2*rkC(2)*Z1(i)+Z3(i)*rkC(2)*rkC(1)**2 &
                        +rkC(2)**2*rkC(3)*Z1(i)-rkC(2)**2*rkC(1)*Z3(i) &
                        +rkC(3)**2*rkC(1)*Z2(i)-Z2(i)*rkC(3)*rkC(1)**2)&
                        /den-Z3(i)
             CONT(i,2)= -( rkC(1)**2*(Z3(i)-Z2(i)) + rkC(2)**2*(Z1(i)  &
                          -Z3(i)) +rkC(3)**2*(Z2(i)-Z1(i)) )/den
             CONT(i,3)= ( rkC(1)*(Z3(i)-Z2(i)) + rkC(2)*(Z1(i)-Z3(i))  &
                           +rkC(3)*(Z2(i)-Z1(i)) )/den
         END DO
      CASE ('eval')
          ! Evaluate quadratic polynomial
          r = H/Hold
         x1 = ONE + rkC(1)*r
         x2 = ONE + rkC(2)*r
         x3 = ONE + rkC(3)*r
         DO i=1,N
            Z1(i) = CONT(i,1)+x1*(CONT(i,2)+x1*CONT(i,3))
            Z2(i) = CONT(i,1)+x2*(CONT(i,2)+x2*CONT(i,3))
            Z3(i) = CONT(i,1)+x3*(CONT(i,2)+x3*CONT(i,3))
         END DO
       END SELECT   
  END SUBROUTINE RK_Interpolate


!~~~~~~~~~~~~~~~~~~~~~~~~~~~~~~~~~~~~~~~~~~~~~~~~~~~~~~~~~
   SUBROUTINE RK_PrepareRHS(N,T,H,Y,Z1,Z2,Z3,R1,R2,R3)
!~~~> Prepare the right-hand side for Newton iterations
!     R = Z - hA x F
!~~~~~~~~~~~~~~~~~~~~~~~~~~~~~~~~~~~~~~~~~~~~~~~~~~~~~~~~~
      IMPLICIT NONE
      
      INTEGER :: N
      KPP_REAL :: T,H
      KPP_REAL, DIMENSION(N) :: Y,Z1,Z2,Z3,F,R1,R2,R3,TMP

      CALL WCOPY(N,Z1,1,R1,1) ! R1 <- Z1
      CALL WCOPY(N,Z2,1,R2,1) ! R2 <- Z2
      CALL WCOPY(N,Z3,1,R3,1) ! R3 <- Z3

      CALL WADD(N,Y,Z1,TMP)              ! TMP <- Y + Z1
      CALL FUN_CHEM(T+rkC(1)*H,TMP,F)    ! F1 <- Fun(Y+Z1)         
      CALL WAXPY(N,-H*rkA(1,1),F,1,R1,1) ! R1 <- R1 - h*A_11*F1
      CALL WAXPY(N,-H*rkA(2,1),F,1,R2,1) ! R2 <- R2 - h*A_21*F1
      CALL WAXPY(N,-H*rkA(3,1),F,1,R3,1) ! R3 <- R3 - h*A_31*F1

      CALL WADD(N,Y,Z2,TMP)              ! TMP <- Y + Z2
      CALL FUN_CHEM(T+rkC(2)*H,TMP,F)    ! F2 <- Fun(Y+Z2)        
      CALL WAXPY(N,-H*rkA(1,2),F,1,R1,1) ! R1 <- R1 - h*A_12*F2
      CALL WAXPY(N,-H*rkA(2,2),F,1,R2,1) ! R2 <- R2 - h*A_22*F2
      CALL WAXPY(N,-H*rkA(3,2),F,1,R3,1) ! R3 <- R3 - h*A_32*F2

      CALL WADD(N,Y,Z3,TMP)              ! TMP <- Y + Z3
      CALL FUN_CHEM(T+rkC(3)*H,TMP,F)    ! F3 <- Fun(Y+Z3)     
      CALL WAXPY(N,-H*rkA(1,3),F,1,R1,1) ! R1 <- R1 - h*A_13*F3
      CALL WAXPY(N,-H*rkA(2,3),F,1,R2,1) ! R2 <- R2 - h*A_23*F3
      CALL WAXPY(N,-H*rkA(3,3),F,1,R3,1) ! R3 <- R3 - h*A_33*F3
            
  END SUBROUTINE RK_PrepareRHS
  
!~~~~~~~~~~~~~~~~~~~~~~~~~~~~~~~~~~~~~~~~~~~~~~~~~~~~~~~~~
   SUBROUTINE RK_PrepareRHS_Adj(N,H,Jac1,Jac2,Jac3,Lambda, &
                      U1,U2,U3,G1,G2,G3,R1,R2,R3)
!~~~> Prepare the right-hand side for Newton iterations
!     R = Z_adj - hA x Jac*Z_adj - h J^t b lambda
!~~~~~~~~~~~~~~~~~~~~~~~~~~~~~~~~~~~~~~~~~~~~~~~~~~~~~~~~~
      IMPLICIT NONE
      
      INTEGER, INTENT(IN) :: N
      KPP_REAL, INTENT(IN) :: H
      KPP_REAL, DIMENSION(N), INTENT(IN) :: U1,U2,U3,Lambda,G1,G2,G3
      KPP_REAL, DIMENSION(N), INTENT(OUT) :: R1,R2,R3
#ifdef FULL_ALGEBRA      
      KPP_REAL, DIMENSION(N,N), INTENT(IN) :: Jac1, Jac2, Jac3
#else      
      KPP_REAL, DIMENSION(LU_NONZERO),INTENT(IN) :: Jac1, Jac2, Jac3
#endif
      KPP_REAL, DIMENSION(N) ::  F,TMP


      CALL WCOPY(N,G1,1,R1,1) ! R1 <- G1
      CALL WCOPY(N,G2,1,R2,1) ! R2 <- G2
      CALL WCOPY(N,G3,1,R3,1) ! R3 <- G3

      CALL SET2ZERO(N,F)
      CALL WAXPY(N,-H*rkA(1,1),U1,1,F,1) ! F1 <- -h*A_11*U1
      CALL WAXPY(N,-H*rkA(2,1),U2,1,F,1) ! F1 <- F1 - h*A_21*U2
      CALL WAXPY(N,-H*rkA(3,1),U3,1,F,1) ! F1 <- F1 - h*A_31*U3
#ifdef FULL_ALGEBRA  
      TMP = MATMUL(TRANSPOSE(Jac1),F)    
#else      
      CALL JacTR_SP_Vec ( Jac1, F, TMP )   ! R1 <- -Jac(Y+Z1)^t*h*sum(A_j1*U_j)  
#endif      
      CALL WAXPY(N,ONE,U1,1,TMP,1) ! R1 <- U1 -Jac(Y+Z1)^t*h*sum(A_j1*U_j)
      CALL WAXPY(N,ONE,TMP,1,R1,1) ! R1 <- U1 -Jac(Y+Z1)^t*h*sum(A_j1*U_j)

      CALL SET2ZERO(N,F)
      CALL WAXPY(N,-H*rkA(1,2),U1,1,F,1) ! F2 <- -h*A_11*U1
      CALL WAXPY(N,-H*rkA(2,2),U2,1,F,1) ! F2 <- F2 - h*A_21*U2
      CALL WAXPY(N,-H*rkA(3,2),U3,1,F,1) ! F2 <- F2 - h*A_31*U3
#ifdef FULL_ALGEBRA  
      TMP = MATMUL(TRANSPOSE(Jac2),F)    
#else      
      CALL JacTR_SP_Vec ( Jac2, F, TMP )   ! R2 <- -Jac(Y+Z2)^t*h*sum(A_j2*U_j)  
#endif      
      CALL WAXPY(N,ONE,U2,1,TMP,1) ! R2 <- U2 -Jac(Y+Z2)^t*h*sum(A_j2*U_j)
      CALL WAXPY(N,ONE,TMP,1,R2,1) ! R2 <- U2 -Jac(Y+Z2)^t*h*sum(A_j2*U_j)

      CALL SET2ZERO(N,F)
      CALL WAXPY(N,-H*rkA(1,3),U1,1,F,1) ! F3 <- -h*A_11*U1
      CALL WAXPY(N,-H*rkA(2,3),U2,1,F,1) ! F3 <- F3 - h*A_21*U2
      CALL WAXPY(N,-H*rkA(3,3),U3,1,F,1) ! F3 <- F3 - h*A_31*U3
#ifdef FULL_ALGEBRA  
      TMP = MATMUL(TRANSPOSE(Jac3),F)    
#else      
      CALL JacTR_SP_Vec ( Jac3, F, TMP )   ! R3 <- -Jac(Y+Z3)^t*h*sum(A_j3*U_j)  
#endif      
      CALL WAXPY(N,ONE,U3,1,TMP,1) ! R3 <- U3 -Jac(Y+Z3)^t*h*sum(A_j3*U_j)
      CALL WAXPY(N,ONE,TMP,1,R3,1) ! R3 <- U3 -Jac(Y+Z3)^t*h*sum(A_j3*U_j)


  END SUBROUTINE RK_PrepareRHS_Adj

!~~~~~~~~~~~~~~~~~~~~~~~~~~~~~~~~~~~~~~~~~~~~~~~~~~~~~~~~~
   SUBROUTINE RK_PrepareRHS_G(N,H,Jac1,Jac2,Jac3,Lambda, &
                      G1,G2,G3)
!~~~> Prepare the right-hand side for Newton iterations
!     R = Z_adj - hA x Jac*Z_adj - h J^t b lambda
!~~~~~~~~~~~~~~~~~~~~~~~~~~~~~~~~~~~~~~~~~~~~~~~~~~~~~~~~~
      IMPLICIT NONE
      
      INTEGER, INTENT(IN) :: N
      KPP_REAL, INTENT(IN) :: H
      KPP_REAL, DIMENSION(N), INTENT(IN) :: Lambda
      KPP_REAL, DIMENSION(N), INTENT(OUT) :: G1,G2,G3
#ifdef FULL_ALGEBRA      
      KPP_REAL, DIMENSION(N,N), INTENT(IN) :: Jac1, Jac2, Jac3
#else      
      KPP_REAL, DIMENSION(LU_NONZERO),INTENT(IN) :: Jac1, Jac2, Jac3
#endif
      KPP_REAL, DIMENSION(N) ::  F  

      CALL SET2ZERO(N,G1)
      CALL SET2ZERO(N,G2)
      CALL SET2ZERO(N,G3)
#ifdef FULL_ALGEBRA  
      F = MATMUL(TRANSPOSE(Jac1),Lambda)    
#else      
      CALL JacTR_SP_Vec ( Jac1, Lambda, F )   ! F1 <- Jac(Y+Z1)^t*Lambda  
#endif      
      CALL WAXPY(N,-H*rkB(1),F,1,G1,1) ! R1 <- R1 - h*B_1*F1

#ifdef FULL_ALGEBRA      
      F = MATMUL(TRANSPOSE(Jac2),Lambda)    
#else      
      CALL JacTR_SP_Vec ( Jac2, Lambda, F )   ! F2 <- Jac(Y+Z2)^t*Lambda  
#endif      
      CALL WAXPY(N,-H*rkB(2),F,1,G2,1) ! R2 <- R2 - h*B_2*F2

#ifdef FULL_ALGEBRA      
      F = MATMUL(TRANSPOSE(Jac3),Lambda)    
#else      
      CALL JacTR_SP_Vec ( Jac3, Lambda, F )   ! F3 <- Jac(Y+Z3)^t*Lambda  
#endif      
      CALL WAXPY(N,-H*rkB(3),F,1,G3,1) ! R3 <- R3 - h*B_3*F3

            
  END SUBROUTINE RK_PrepareRHS_G
  

!~~~~~~~~~~~~~~~~~~~~~~~~~~~~~~~~~~~~~~~~~~~~~~~~~~~~~~~~~
   SUBROUTINE RK_Decomp(N,H,FJAC,E1,IP1,E2,IP2,ISING)
   !~~~> Compute the matrices E1 and E2 and their decompositions
!~~~~~~~~~~~~~~~~~~~~~~~~~~~~~~~~~~~~~~~~~~~~~~~~~~~~~~~~~
      IMPLICIT NONE
      
      INTEGER :: N, ISING
      KPP_REAL    :: H, Alpha, Beta, Gamma
#ifdef FULL_ALGEBRA      
      KPP_REAL    :: FJAC(N,N),E1(N,N)
      COMPLEX(kind=dp) :: E2(N,N)
#else      
      KPP_REAL    :: FJAC(LU_NONZERO),E1(LU_NONZERO)
      COMPLEX(kind=dp) :: E2(LU_NONZERO)
#endif      
      INTEGER :: IP1(N), IP2(N), i, j
      
      Gamma = rkGamma/H
      Alpha = rkAlpha/H
      Beta  = rkBeta /H

#ifdef FULL_ALGEBRA      
      DO j=1,N
         DO  i=1,N
            E1(i,j)=-FJAC(i,j)
         END DO
         E1(j,j)=E1(j,j)+Gamma
      END DO
      CALL DGETRF(N,N,E1,N,IP1,ISING) 
#else      
      DO i=1,LU_NONZERO
         E1(i)=-FJAC(i)
      END DO
      DO i=1,N
         j=LU_DIAG(i); E1(j)=E1(j)+Gamma
      END DO
      CALL KppDecomp(E1,ISING)
#endif      
      
      IF (ISING /= 0) THEN
         ISTATUS(idec) = ISTATUS(idec) + 1
         RETURN
      END IF
     
#ifdef FULL_ALGEBRA      
      DO j=1,N
        DO i=1,N
          E2(i,j) = DCMPLX( -FJAC(i,j), ZERO )
        END DO
        E2(j,j) = E2(j,j) + CMPLX( Alpha, Beta )
      END DO
      CALL ZGETRF(N,N,E2,N,IP2,ISING)     
#else  
      DO i=1,LU_NONZERO
         E2(i) = DCMPLX( -FJAC(i), ZERO )
      END DO
      DO i=1,N
         j = LU_DIAG(i); E2(j)=E2(j) + CMPLX( Alpha, Beta )
      END DO
      CALL KppDecompCmplx(E2,ISING)    
#endif      
      ISTATUS(idec) = ISTATUS(idec) + 1
      
   END SUBROUTINE RK_Decomp


!~~~~~~~~~~~~~~~~~~~~~~~~~~~~~~~~~~~~~~~~~~~~~~~~~~~~~~~~~
   SUBROUTINE RK_Solve(N,H,E1,IP1,E2,IP2,R1,R2,R3,ISING)
!~~~~~~~~~~~~~~~~~~~~~~~~~~~~~~~~~~~~~~~~~~~~~~~~~~~~~~~~~
      IMPLICIT NONE
      INTEGER :: N,IP1(N),IP2(N),ISING
#ifdef FULL_ALGEBRA      
      KPP_REAL    :: E1(N,N)
      COMPLEX(kind=dp) :: E2(N,N)
#else      
      KPP_REAL    :: E1(LU_NONZERO)
      COMPLEX(kind=dp) :: E2(LU_NONZERO)
#endif      
      KPP_REAL    :: R1(N),R2(N),R3(N)
      KPP_REAL    :: H, x1, x2, x3
      COMPLEX(kind=dp) :: BC(N)
      INTEGER :: i
!      
     ! Z <- h^{-1) T^{-1) A^{-1) x Z
      DO i=1,N
          x1 = R1(i)/H; x2 = R2(i)/H; x3 = R3(i)/H
          R1(i) = rkTinvAinv(1,1)*x1 + rkTinvAinv(1,2)*x2 + rkTinvAinv(1,3)*x3
          R2(i) = rkTinvAinv(2,1)*x1 + rkTinvAinv(2,2)*x2 + rkTinvAinv(2,3)*x3
          R3(i) = rkTinvAinv(3,1)*x1 + rkTinvAinv(3,2)*x2 + rkTinvAinv(3,3)*x3
      END DO

#ifdef FULL_ALGEBRA      
      CALL DGETRS ('N',N,1,E1,N,IP1,R1,N,0) 
#else      
      CALL KppSolve (E1,R1)
#endif      
!      
      DO i=1,N
        BC(i) = DCMPLX(R2(i),R3(i))
      END DO
#ifdef FULL_ALGEBRA      
      CALL ZGETRS ('N',N,1,E2,N,IP2,BC,N,0) 
#else      
      CALL KppSolveCmplx (E2,BC)
#endif      
      DO i=1,N
        R2(i) = DBLE( BC(i) )
        R3(i) = AIMAG( BC(i) )
      END DO

      ! Z <- T x Z
      DO i=1,N
          x1 = R1(i); x2 = R2(i); x3 = R3(i)
          R1(i) = rkT(1,1)*x1 + rkT(1,2)*x2 + rkT(1,3)*x3
          R2(i) = rkT(2,1)*x1 + rkT(2,2)*x2 + rkT(2,3)*x3
          R3(i) = rkT(3,1)*x1 + rkT(3,2)*x2 + rkT(3,3)*x3
      END DO

      ISTATUS(isol) = ISTATUS(isol) + 1

   END SUBROUTINE RK_Solve


!~~~~~~~~~~~~~~~~~~~~~~~~~~~~~~~~~~~~~~~~~~~~~~~~~~~~~~~~~
   SUBROUTINE RK_SolveTR(N,H,E1,IP1,E2,IP2,R1,R2,R3,ISING)
!~~~~~~~~~~~~~~~~~~~~~~~~~~~~~~~~~~~~~~~~~~~~~~~~~~~~~~~~~
      IMPLICIT NONE
      INTEGER, INTENT(IN)  :: N,IP1(N),IP2(N)
      INTEGER, INTENT(OUT) :: ISING
#ifdef FULL_ALGEBRA      
      KPP_REAL,    INTENT(IN) :: E1(N,N)
      COMPLEX(kind=dp), INTENT(IN) :: E2(N,N)
#else      
      KPP_REAL,    INTENT(IN) :: E1(LU_NONZERO)
      COMPLEX(kind=dp), INTENT(IN) :: E2(LU_NONZERO)
#endif      
      KPP_REAL, INTENT(INOUT) :: R1(N),R2(N),R3(N)
      KPP_REAL    :: H, x1, x2, x3
      COMPLEX(kind=dp) :: BC(N)
      INTEGER :: i
!      
     ! RHS <- h^{-1) (A^{-1) T^{-1))^t x RHS
      DO i=1,N
          x1 = R1(i)/H; x2 = R2(i)/H; x3 = R3(i)/H
          R1(i) = rkAinvT(1,1)*x1 + rkAinvT(2,1)*x2 + rkAinvT(3,1)*x3
          R2(i) = rkAinvT(1,2)*x1 + rkAinvT(2,2)*x2 + rkAinvT(3,2)*x3
          R3(i) = rkAinvT(1,3)*x1 + rkAinvT(2,3)*x2 + rkAinvT(3,3)*x3
      END DO

#ifdef FULL_ALGEBRA      
      CALL DGETRS ('T',N,1,E1,N,IP1,R1,N,0) 
#else      
      CALL KppSolveTR (E1,R1,R1)
#endif      
!      
      DO i=1,N
        BC(i) = DCMPLX(R2(i),-R3(i))
      END DO
#ifdef FULL_ALGEBRA      
      CALL ZGETRS ('T',N,1,E2,N,IP2,BC,N,0) 
#else      
      CALL KppSolveTRCmplx (E2,BC)
#endif      
      DO i=1,N
        R2(i) = DBLE( BC(i) )
        R3(i) = -AIMAG( BC(i) )
      END DO

      ! X <- (T^{-1})^t x X
      DO i=1,N
          x1 = R1(i); x2 = R2(i); x3 = R3(i)
          R1(i) = rkTinv(1,1)*x1 + rkTinv(2,1)*x2 + rkTinv(3,1)*x3
          R2(i) = rkTinv(1,2)*x1 + rkTinv(2,2)*x2 + rkTinv(3,2)*x3
          R3(i) = rkTinv(1,3)*x1 + rkTinv(2,3)*x2 + rkTinv(3,3)*x3
      END DO

      ISTATUS(isol) = ISTATUS(isol) + 1

   END SUBROUTINE RK_SolveTR

!~~~~~~~~~~~~~~~~~~~~~~~~~~~~~~~~~~~~~~~~~~~~~~~~~~~~~~~~~
   SUBROUTINE RK_ErrorEstimate(N,H,Y,T, &
               E1,IP1,Z1,Z2,Z3,SCAL,Err,     &
               FirstStep,Reject)
!~~~~~~~~~~~~~~~~~~~~~~~~~~~~~~~~~~~~~~~~~~~~~~~~~~~~~~~~~
      IMPLICIT NONE
      
      INTEGER :: N
#ifdef FULL_ALGEBRA      
      KPP_REAL :: E1(N,N)
#else      
      KPP_REAL :: E1(LU_NONZERO)
#endif      
      KPP_REAL :: SCAL(N),Z1(N),Z2(N),Z3(N),F1(N),F2(N), &
                        F0(N),Y(N),TMP(N),T,H
      INTEGER :: IP1(N), i
      LOGICAL FirstStep,Reject
      KPP_REAL :: HEE1,HEE2,HEE3,Err

      HEE1  = rkE(1)/H
      HEE2  = rkE(2)/H
      HEE3  = rkE(3)/H

      CALL FUN_CHEM(T,Y,F0)
      ISTATUS(ifun) = ISTATUS(ifun) + 1

      DO  i=1,N
         F2(i)  = HEE1*Z1(i)+HEE2*Z2(i)+HEE3*Z3(i)
         TMP(i) = rkE(0)*F0(i) + F2(i)
      END DO

#ifdef FULL_ALGEBRA      
      CALL DGETRS ('N',N,1,E1,N,IP1,TMP,N,0) 
      IF ((rkMethod==R1A).OR.(rkMethod==GAU).OR.(rkMethod==L3A)) CALL DGETRS ('N',N,1,E1,N,IP1,TMP,N,0)
      IF (rkMethod==GAU) CALL DGETRS ('N',N,1,E1,N,IP1,TMP,N,0)
#else      
      CALL KppSolve (E1, TMP)
      IF ((rkMethod==R1A).OR.(rkMethod==GAU).OR.(rkMethod==L3A)) CALL KppSolve (E1,TMP)
      IF (rkMethod==GAU) CALL KppSolve (E1,TMP)
#endif      

      Err = RK_ErrorNorm(N,SCAL,TMP)
!
      IF (Err < ONE) RETURN
firej:IF (FirstStep.OR.Reject) THEN
          DO i=1,N
             TMP(i)=Y(i)+TMP(i)
          END DO
          CALL FUN_CHEM(T,TMP,F1)    
          ISTATUS(ifun) = ISTATUS(ifun) + 1
          DO i=1,N
             TMP(i)=F1(i)+F2(i)
          END DO

#ifdef FULL_ALGEBRA      
          CALL DGETRS ('N',N,1,E1,N,IP1,TMP,N,0) 
#else      
          CALL KppSolve (E1, TMP)
#endif      
          Err = RK_ErrorNorm(N,SCAL,TMP)
       END IF firej
 
   END SUBROUTINE RK_ErrorEstimate

!~~~~~~~~~~~~~~~~~~~~~~~~~~~~~~~~~~~~~~~~~~~~~~~~~~~~~~~~~
   KPP_REAL FUNCTION RK_ErrorNorm(N,SCAL,DY)
!~~~~~~~~~~~~~~~~~~~~~~~~~~~~~~~~~~~~~~~~~~~~~~~~~~~~~~~~~
      IMPLICIT NONE
      
      INTEGER :: N
      KPP_REAL :: SCAL(N),DY(N)
      INTEGER :: i

      RK_ErrorNorm = ZERO
      DO i=1,N
          RK_ErrorNorm = RK_ErrorNorm + (DY(i)*SCAL(i))**2
      END DO
      RK_ErrorNorm = MAX( SQRT(RK_ErrorNorm/N), 1.0d-10 )
 
   END FUNCTION RK_ErrorNorm
  
!~~~~~~~~~~~~~~~~~~~~~~~~~~~~~~~~~~~~~~~~~~~~~~~~~~~~~~~~~
  SUBROUTINE Radau2A_Coefficients
!    The coefficients of the 3-stage Radau-2A method
!    (given to ~30 accurate digits)
!~~~~~~~~~~~~~~~~~~~~~~~~~~~~~~~~~~~~~~~~~~~~~~~~~~~~~~~~~     
      IMPLICIT NONE
! The coefficients of the Radau2A method
      KPP_REAL :: b0

!      b0 = 1.0d0
      IF (SdirkError) THEN
        b0 = 0.2d-1
      ELSE
        b0 = 0.5d-1
      END IF

! The coefficients of the Radau2A method
      rkMethod = R2A

      rkA(1,1) =  1.968154772236604258683861429918299d-1
      rkA(1,2) = -6.55354258501983881085227825696087d-2
      rkA(1,3) =  2.377097434822015242040823210718965d-2
      rkA(2,1) =  3.944243147390872769974116714584975d-1
      rkA(2,2) =  2.920734116652284630205027458970589d-1
      rkA(2,3) = -4.154875212599793019818600988496743d-2
      rkA(3,1) =  3.764030627004672750500754423692808d-1
      rkA(3,2) =  5.124858261884216138388134465196080d-1
      rkA(3,3) =  1.111111111111111111111111111111111d-1

      rkB(1) = 3.764030627004672750500754423692808d-1
      rkB(2) = 5.124858261884216138388134465196080d-1
      rkB(3) = 1.111111111111111111111111111111111d-1

      rkC(1) = 1.550510257216821901802715925294109d-1
      rkC(2) = 6.449489742783178098197284074705891d-1
      rkC(3) = 1.0d0
      
      ! New solution: H* Sum B_j*f(Z_j) = Sum D_j*Z_j
      rkD(1) = 0.0d0
      rkD(2) = 0.0d0
      rkD(3) = 1.0d0

      ! Classical error estimator: 
      ! H* Sum (B_j-Bhat_j)*f(Z_j) = H*E(0)*f(0) + Sum E_j*Z_j
      rkE(0) = 1.0d0*b0
      rkE(1) = -10.04880939982741556246032950764708d0*b0
      rkE(2) = 1.382142733160748895793662840980412d0*b0
      rkE(3) = -.3333333333333333333333333333333333d0*b0

      ! Sdirk error estimator
      rkBgam(0) = b0
      rkBgam(1) = .3764030627004672750500754423692807d0-1.558078204724922382431975370686279d0*b0
      rkBgam(2) = .8914115380582557157653087040196118d0*b0+.5124858261884216138388134465196077d0
      rkBgam(3) = -.1637777184845662566367174924883037d0-.3333333333333333333333333333333333d0*b0
      rkBgam(4) = .2748888295956773677478286035994148d0

      ! H* Sum Bgam_j*f(Z_j) = H*Bgam(0)*f(0) + Sum Theta_j*Z_j
      rkTheta(1) = -1.520677486405081647234271944611547d0-10.04880939982741556246032950764708d0*b0
      rkTheta(2) = 2.070455145596436382729929151810376d0+1.382142733160748895793662840980413d0*b0
      rkTheta(3) = -.3333333333333333333333333333333333d0*b0-.3744441479783868387391430179970741d0

      ! Local order of error estimator 
      IF (b0==0.0d0) THEN
        rkELO  = 6.0d0
      ELSE	
        rkELO  = 4.0d0
      END IF	

      !~~~~~~~~~~~~~~~~~~~~~~~~~~~~~~~~~~~~~~~~~~~~~~
      !~~~> Diagonalize the RK matrix:               
      ! rkTinv * inv(rkA) * rkT =          
      !           |  rkGamma      0           0     |
      !           |      0      rkAlpha   -rkBeta   |
      !           |      0      rkBeta     rkAlpha  |
      !~~~~~~~~~~~~~~~~~~~~~~~~~~~~~~~~~~~~~~~~~~~~~~

      rkGamma = 3.637834252744495732208418513577775d0
      rkAlpha = 2.681082873627752133895790743211112d0
      rkBeta  = 3.050430199247410569426377624787569d0

      rkT(1,1) =  9.443876248897524148749007950641664d-2
      rkT(1,2) = -1.412552950209542084279903838077973d-1
      rkT(1,3) = -3.00291941051474244918611170890539d-2
      rkT(2,1) =  2.502131229653333113765090675125018d-1
      rkT(2,2) =  2.041293522937999319959908102983381d-1
      rkT(2,3) =  3.829421127572619377954382335998733d-1
      rkT(3,1) =  1.0d0
      rkT(3,2) =  1.0d0
      rkT(3,3) =  0.0d0

      rkTinv(1,1) =  4.178718591551904727346462658512057d0
      rkTinv(1,2) =  3.27682820761062387082533272429617d-1
      rkTinv(1,3) =  5.233764454994495480399309159089876d-1
      rkTinv(2,1) = -4.178718591551904727346462658512057d0
      rkTinv(2,2) = -3.27682820761062387082533272429617d-1
      rkTinv(2,3) =  4.766235545005504519600690840910124d-1
      rkTinv(3,1) = -5.02872634945786875951247343139544d-1
      rkTinv(3,2) =  2.571926949855605429186785353601676d0
      rkTinv(3,3) = -5.960392048282249249688219110993024d-1

      rkTinvAinv(1,1) =  1.520148562492775501049204957366528d+1
      rkTinvAinv(1,2) =  1.192055789400527921212348994770778d0
      rkTinvAinv(1,3) =  1.903956760517560343018332287285119d0
      rkTinvAinv(2,1) = -9.669512977505946748632625374449567d0
      rkTinvAinv(2,2) = -8.724028436822336183071773193986487d0
      rkTinvAinv(2,3) =  3.096043239482439656981667712714881d0
      rkTinvAinv(3,1) = -1.409513259499574544876303981551774d+1
      rkTinvAinv(3,2) =  5.895975725255405108079130152868952d0
      rkTinvAinv(3,3) = -1.441236197545344702389881889085515d-1

      rkAinvT(1,1) = .3435525649691961614912493915818282d0
      rkAinvT(1,2) = -.4703191128473198422370558694426832d0
      rkAinvT(1,3) = .3503786597113668965366406634269080d0
      rkAinvT(2,1) = .9102338692094599309122768354288852d0
      rkAinvT(2,2) = 1.715425895757991796035292755937326d0
      rkAinvT(2,3) = .4040171993145015239277111187301784d0
      rkAinvT(3,1) = 3.637834252744495732208418513577775d0
      rkAinvT(3,2) = 2.681082873627752133895790743211112d0
      rkAinvT(3,3) = -3.050430199247410569426377624787569d0

  END SUBROUTINE Radau2A_Coefficients

    

    
!~~~~~~~~~~~~~~~~~~~~~~~~~~~~~~~~~~~~~~~~~~~~~~~~~~~~~~~~~
  SUBROUTINE Lobatto3C_Coefficients
!    The coefficients of the 3-stage Lobatto-3C method
!    (given to ~30 accurate digits)
!    The parameter b0 can be chosen to tune the error estimator
!~~~~~~~~~~~~~~~~~~~~~~~~~~~~~~~~~~~~~~~~~~~~~~~~~~~~~~~~~     
      IMPLICIT NONE
      KPP_REAL :: b0

      rkMethod = L3C

!      b0 = 1.0d0
      IF (SdirkError) THEN
        b0 = 0.2d0
      ELSE
        b0 = 0.5d0
      END IF
! The coefficients of the Lobatto3C method

      rkA(1,1) =  .1666666666666666666666666666666667d0
      rkA(1,2) = -.3333333333333333333333333333333333d0
      rkA(1,3) =  .1666666666666666666666666666666667d0
      rkA(2,1) =  .1666666666666666666666666666666667d0
      rkA(2,2) =  .4166666666666666666666666666666667d0
      rkA(2,3) = -.8333333333333333333333333333333333d-1
      rkA(3,1) =  .1666666666666666666666666666666667d0
      rkA(3,2) =  .6666666666666666666666666666666667d0
      rkA(3,3) =  .1666666666666666666666666666666667d0

      rkB(1) = .1666666666666666666666666666666667d0
      rkB(2) = .6666666666666666666666666666666667d0
      rkB(3) = .1666666666666666666666666666666667d0

      rkC(1) = 0.0d0
      rkC(2) = 0.5d0
      rkC(3) = 1.0d0

      ! Classical error estimator, embedded solution: 
      rkBhat(0) = b0
      rkBhat(1) = .16666666666666666666666666666666667d0-b0
      rkBhat(2) = .66666666666666666666666666666666667d0
      rkBhat(3) = .16666666666666666666666666666666667d0
      
      ! New solution: h Sum_j b_j f(Z_j) = sum d_j Z_j
      rkD(1) = 0.0d0
      rkD(2) = 0.0d0
      rkD(3) = 1.0d0

      ! Classical error estimator: 
      !   H* Sum (B_j-Bhat_j)*f(Z_j) = H*E(0)*f(0) + Sum E_j*Z_j
      rkE(0) =   .3808338772072650364017425226487022*b0
      rkE(1) = -1.142501631621795109205227567946107*b0
      rkE(2) = -1.523335508829060145606970090594809*b0
      rkE(3) =   .3808338772072650364017425226487022*b0

      ! Sdirk error estimator
      rkBgam(0) = b0
      rkBgam(1) = .1666666666666666666666666666666667d0-1.d0*b0
      rkBgam(2) = .6666666666666666666666666666666667d0
      rkBgam(3) = -.2141672105405983697350758559820354d0
      rkBgam(4) = .3808338772072650364017425226487021d0

      ! H* Sum Bgam_j*f(Z_j) = H*Bgam(0)*f(0) + Sum Theta_j*Z_j
      rkTheta(1) = -3.d0*b0-.3808338772072650364017425226487021d0
      rkTheta(2) = -4.d0*b0+1.523335508829060145606970090594808d0
      rkTheta(3) = -.142501631621795109205227567946106d0+b0

      ! Local order of error estimator 
      IF (b0==0.0d0) THEN
        rkELO  = 5.0d0
      ELSE	
        rkELO  = 4.0d0
      END IF	

      !~~~~~~~~~~~~~~~~~~~~~~~~~~~~~~~~~~~~~~~~~~~~~~
      !~~~> Diagonalize the RK matrix:               
      ! rkTinv * inv(rkA) * rkT =          
      !           |  rkGamma      0           0     |
      !           |      0      rkAlpha   -rkBeta   |
      !           |      0      rkBeta     rkAlpha  |
      !~~~~~~~~~~~~~~~~~~~~~~~~~~~~~~~~~~~~~~~~~~~~~~

      rkGamma = 2.625816818958466716011888933765284d0
      rkAlpha = 1.687091590520766641994055533117359d0
      rkBeta  = 2.508731754924880510838743672432351d0

      rkT(1,1) = 1.d0
      rkT(1,2) = 1.d0
      rkT(1,3) = 0.d0
      rkT(2,1) = .4554100411010284672111720348287483d0
      rkT(2,2) = -.6027050205505142336055860174143743d0
      rkT(2,3) = -.4309321229203225731070721341350346d0
      rkT(3,1) = 2.195823345445647152832799205549709d0
      rkT(3,2) = -1.097911672722823576416399602774855d0
      rkT(3,3) = .7850032632435902184104551358922130d0

      rkTinv(1,1) = .4205559181381766909344950150991349d0
      rkTinv(1,2) = .3488903392193734304046467270632057d0
      rkTinv(1,3) = .1915253879645878102698098373933487d0
      rkTinv(2,1) = .5794440818618233090655049849008650d0
      rkTinv(2,2) = -.3488903392193734304046467270632057d0
      rkTinv(2,3) = -.1915253879645878102698098373933487d0
      rkTinv(3,1) = -.3659705575742745254721332009249516d0
      rkTinv(3,2) = -1.463882230297098101888532803699806d0
      rkTinv(3,3) = .4702733607340189781407813565524989d0

      rkTinvAinv(1,1) = 1.104302803159744452668648155627548d0
      rkTinvAinv(1,2) = .916122120694355522658740710823143d0
      rkTinvAinv(1,3) = .5029105849749601702795812241441172d0
      rkTinvAinv(2,1) = 1.895697196840255547331351844372453d0
      rkTinvAinv(2,2) = 3.083877879305644477341259289176857d0
      rkTinvAinv(2,3) = -1.502910584974960170279581224144117d0
      rkTinvAinv(3,1) = .8362439183082935036129145574774502d0
      rkTinvAinv(3,2) = -3.344975673233174014451658229909802d0
      rkTinvAinv(3,3) = .312908409479233358005944466882642d0

      rkAinvT(1,1) = 2.625816818958466716011888933765282d0
      rkAinvT(1,2) = 1.687091590520766641994055533117358d0
      rkAinvT(1,3) = -2.508731754924880510838743672432351d0
      rkAinvT(2,1) = 1.195823345445647152832799205549710d0
      rkAinvT(2,2) = -2.097911672722823576416399602774855d0
      rkAinvT(2,3) = .7850032632435902184104551358922130d0
      rkAinvT(3,1) = 5.765829871932827589653709477334136d0
      rkAinvT(3,2) = .1170850640335862051731452613329320d0
      rkAinvT(3,3) = 4.078738281412060947659653944216779d0

  END SUBROUTINE Lobatto3C_Coefficients

!~~~~~~~~~~~~~~~~~~~~~~~~~~~~~~~~~~~~~~~~~~~~~~~~~~~~~~~~~
  SUBROUTINE Gauss_Coefficients
!    The coefficients of the 3-stage Gauss method
!    (given to ~30 accurate digits)
!    The parameter b3 can be chosen by the user
!    to tune the error estimator
!~~~~~~~~~~~~~~~~~~~~~~~~~~~~~~~~~~~~~~~~~~~~~~~~~~~~~~~~~     
      IMPLICIT NONE
      KPP_REAL :: b0
! The coefficients of the Gauss method


      rkMethod = GAU
      
!      b0 = 4.0d0
      b0 = 0.1d0
      
! The coefficients of the Gauss method

      rkA(1,1) =  .1388888888888888888888888888888889d0
      rkA(1,2) = -.359766675249389034563954710966045d-1
      rkA(1,3) =  .97894440153083260495800422294756d-2
      rkA(2,1) =  .3002631949808645924380249472131556d0
      rkA(2,2) =  .2222222222222222222222222222222222d0
      rkA(2,3) = -.224854172030868146602471694353778d-1
      rkA(3,1) =  .2679883337624694517281977355483022d0
      rkA(3,2) =  .4804211119693833479008399155410489d0
      rkA(3,3) =  .1388888888888888888888888888888889d0

      rkB(1) = .2777777777777777777777777777777778d0
      rkB(2) = .4444444444444444444444444444444444d0
      rkB(3) = .2777777777777777777777777777777778d0

      rkC(1) = .1127016653792583114820734600217600d0
      rkC(2) = .5000000000000000000000000000000000d0
      rkC(3) = .8872983346207416885179265399782400d0

      ! Classical error estimator, embedded solution: 
      rkBhat(0) = b0
      rkBhat(1) =-1.4788305577012361475298775666303999d0*b0 &
                  +.27777777777777777777777777777777778d0
      rkBhat(2) =  .44444444444444444444444444444444444d0 &
                  +.66666666666666666666666666666666667d0*b0
      rkBhat(3) = -.18783610896543051913678910003626672d0*b0 &
                  +.27777777777777777777777777777777778d0

      ! New solution: h Sum_j b_j f(Z_j) = sum d_j Z_j
      rkD(1) = .1666666666666666666666666666666667d1
      rkD(2) = -.1333333333333333333333333333333333d1
      rkD(3) = .1666666666666666666666666666666667d1

      ! Classical error estimator: 
      !   H* Sum (B_j-Bhat_j)*f(Z_j) = H*E(0)*f(0) + Sum E_j*Z_j
      rkE(0) = .2153144231161121782447335303806954d0*b0
      rkE(1) = -2.825278112319014084275808340593191d0*b0
      rkE(2) = .2870858974881495709929780405075939d0*b0
      rkE(3) = -.4558086256248162565397206448274867d-1*b0

      ! Sdirk error estimator
      rkBgam(0) = 0.d0
      rkBgam(1) = .2373339543355109188382583162660537d0
      rkBgam(2) = .5879873931885192299409334646982414d0
      rkBgam(3) = -.4063577064014232702392531134499046d-1
      rkBgam(4) = .2153144231161121782447335303806955d0

      ! H* Sum Bgam_j*f(Z_j) = H*Bgam(0)*f(0) + Sum Theta_j*Z_j
      rkTheta(1) = -2.594040933093095272574031876464493d0
      rkTheta(2) = 1.824611539036311947589425112250199d0
      rkTheta(3) = .1856563166634371860478043996459493d0

      ! ELO = local order of classical error estimator 
      rkELO = 4.0d0

      !~~~~~~~~~~~~~~~~~~~~~~~~~~~~~~~~~~~~~~~~~~~~~~
      !~~~> Diagonalize the RK matrix:               
      ! rkTinv * inv(rkA) * rkT =          
      !           |  rkGamma      0           0     |
      !           |      0      rkAlpha   -rkBeta   |
      !           |      0      rkBeta     rkAlpha  |
      !~~~~~~~~~~~~~~~~~~~~~~~~~~~~~~~~~~~~~~~~~~~~~~

      rkGamma = 4.644370709252171185822941421408064d0
      rkAlpha = 3.677814645373914407088529289295970d0
      rkBeta  = 3.508761919567443321903661209182446d0

      rkT(1,1) =  .7215185205520017032081769924397664d-1
      rkT(1,2) = -.8224123057363067064866206597516454d-1
      rkT(1,3) = -.6012073861930850173085948921439054d-1
      rkT(2,1) =  .1188325787412778070708888193730294d0
      rkT(2,2) =  .5306509074206139504614411373957448d-1
      rkT(2,3) =  .3162050511322915732224862926182701d0
      rkT(3,1) = 1.d0
      rkT(3,2) = 1.d0
      rkT(3,3) = 0.d0

      rkTinv(1,1) =  5.991698084937800775649580743981285d0
      rkTinv(1,2) =  1.139214295155735444567002236934009d0
      rkTinv(1,3) =   .4323121137838583855696375901180497d0
      rkTinv(2,1) = -5.991698084937800775649580743981285d0
      rkTinv(2,2) = -1.139214295155735444567002236934009d0
      rkTinv(2,3) =   .5676878862161416144303624098819503d0
      rkTinv(3,1) = -1.246213273586231410815571640493082d0
      rkTinv(3,2) =  2.925559646192313662599230367054972d0
      rkTinv(3,3) =  -.2577352012734324923468722836888244d0

      rkTinvAinv(1,1) =  27.82766708436744962047620566703329d0
      rkTinvAinv(1,2) =   5.290933503982655311815946575100597d0
      rkTinvAinv(1,3) =   2.007817718512643701322151051660114d0
      rkTinvAinv(2,1) = -17.66368928942422710690385180065675d0
      rkTinvAinv(2,2) = -14.45491129892587782538830044147713d0
      rkTinvAinv(2,3) =   2.992182281487356298677848948339886d0
      rkTinvAinv(3,1) = -25.60678350282974256072419392007303d0
      rkTinvAinv(3,2) =   6.762434375611708328910623303779923d0
      rkTinvAinv(3,3) =   1.043979339483109825041215970036771d0
      
      rkAinvT(1,1) = .3350999483034677402618981153470483d0
      rkAinvT(1,2) = -.5134173605009692329246186488441294d0
      rkAinvT(1,3) = .6745196507033116204327635673208923d-1
      rkAinvT(2,1) = .5519025480108928886873752035738885d0
      rkAinvT(2,2) = 1.304651810077110066076640761092008d0
      rkAinvT(2,3) = .9767507983414134987545585703726984d0
      rkAinvT(3,1) = 4.644370709252171185822941421408064d0
      rkAinvT(3,2) = 3.677814645373914407088529289295970d0
      rkAinvT(3,3) = -3.508761919567443321903661209182446d0
      
  END SUBROUTINE Gauss_Coefficients


!~~~~~~~~~~~~~~~~~~~~~~~~~~~~~~~~~~~~~~~~~~~~~~~~~~~~~~~~~
  SUBROUTINE Radau1A_Coefficients
!    The coefficients of the 3-stage Gauss method
!    (given to ~30 accurate digits)
!    The parameter b3 can be chosen by the user
!    to tune the error estimator
!~~~~~~~~~~~~~~~~~~~~~~~~~~~~~~~~~~~~~~~~~~~~~~~~~~~~~~~~~     
      IMPLICIT NONE
!      KPP_REAL :: b0 = 0.3d0
      KPP_REAL :: b0 = 0.1d0

! The coefficients of the Radau1A method

      rkMethod = R1A

      rkA(1,1) =  .1111111111111111111111111111111111d0
      rkA(1,2) = -.1916383190435098943442935597058829d0
      rkA(1,3) =  .8052720793239878323318244859477174d-1
      rkA(2,1) =  .1111111111111111111111111111111111d0
      rkA(2,2) =  .2920734116652284630205027458970589d0
      rkA(2,3) = -.481334970546573839513422644787591d-1
      rkA(3,1) =  .1111111111111111111111111111111111d0
      rkA(3,2) =  .5370223859435462728402311533676479d0
      rkA(3,3) =  .1968154772236604258683861429918299d0

      rkB(1) = .1111111111111111111111111111111111d0
      rkB(2) = .5124858261884216138388134465196080d0
      rkB(3) = .3764030627004672750500754423692808d0

      rkC(1) = 0.d0
      rkC(2) = .3550510257216821901802715925294109d0
      rkC(3) = .8449489742783178098197284074705891d0

      ! Classical error estimator, embedded solution: 
      rkBhat(0) = b0
      rkBhat(1) = .11111111111111111111111111111111111d0-b0
      rkBhat(2) = .51248582618842161383881344651960810d0
      rkBhat(3) = .37640306270046727505007544236928079d0

      ! New solution: H* Sum B_j*f(Z_j) = Sum D_j*Z_j
      rkD(1) = .3333333333333333333333333333333333d0
      rkD(2) = -.8914115380582557157653087040196127d0
      rkD(3) = .1558078204724922382431975370686279d1

      ! Classical error estimator: 
      ! H* Sum (b_j-bhat_j) f(Z_j) = H*E(0)*F(0) + Sum E_j Z_j
      rkE(0) =   .2748888295956773677478286035994148d0*b0
      rkE(1) = -1.374444147978386838739143017997074d0*b0
      rkE(2) = -1.335337922441686804550326197041126d0*b0
      rkE(3) =   .235782604058977333559011782643466d0*b0

      ! Sdirk error estimator
      rkBgam(0) = 0.0d0
      rkBgam(1) = .1948150124588532186183490991130616d-1
      rkBgam(2) = .7575249005733381398986810981093584d0
      rkBgam(3) = -.518952314149008295083446116200793d-1
      rkBgam(4) = .2748888295956773677478286035994148d0

      ! H* Sum Bgam_j*f(Z_j) = H*Bgam(0)*f(0) + Sum Theta_j*Z_j
      rkTheta(1) = -1.224370034375505083904362087063351d0
      rkTheta(2) = .9340045331532641409047527962010133d0
      rkTheta(3) = .4656990124352088397561234800640929d0

      ! ELO = local order of classical error estimator 
      rkELO = 4.0d0

      !~~~~~~~~~~~~~~~~~~~~~~~~~~~~~~~~~~~~~~~~~~~~~~
      !~~~> Diagonalize the RK matrix:               
      ! rkTinv * inv(rkA) * rkT =          
      !           |  rkGamma      0           0     |
      !           |      0      rkAlpha   -rkBeta   |
      !           |      0      rkBeta     rkAlpha  |
      !~~~~~~~~~~~~~~~~~~~~~~~~~~~~~~~~~~~~~~~~~~~~~~

      rkGamma = 3.637834252744495732208418513577775d0
      rkAlpha = 2.681082873627752133895790743211112d0
      rkBeta  = 3.050430199247410569426377624787569d0

      rkT(1,1) =  .424293819848497965354371036408369d0
      rkT(1,2) = -.3235571519651980681202894497035503d0
      rkT(1,3) = -.522137786846287839586599927945048d0
      rkT(2,1) =  .57594609499806128896291585429339d-1
      rkT(2,2) =  .3148663231849760131614374283783d-2
      rkT(2,3) =  .452429247674359778577728510381731d0
      rkT(3,1) = 1.d0
      rkT(3,2) = 1.d0
      rkT(3,3) = 0.d0

      rkTinv(1,1) = 1.233523612685027760114769983066164d0
      rkTinv(1,2) = 1.423580134265707095505388133369554d0
      rkTinv(1,3) = .3946330125758354736049045150429624d0
      rkTinv(2,1) = -1.233523612685027760114769983066164d0
      rkTinv(2,2) = -1.423580134265707095505388133369554d0
      rkTinv(2,3) = .6053669874241645263950954849570376d0
      rkTinv(3,1) = -.1484438963257383124456490049673414d0
      rkTinv(3,2) = 2.038974794939896109682070471785315d0
      rkTinv(3,3) = -.544501292892686735299355831692542d-1

      rkTinvAinv(1,1) =  4.487354449794728738538663081025420d0
      rkTinvAinv(1,2) =  5.178748573958397475446442544234494d0
      rkTinvAinv(1,3) =  1.435609490412123627047824222335563d0
      rkTinvAinv(2,1) = -2.854361287939276673073807031221493d0
      rkTinvAinv(2,2) = -1.003648660720543859000994063139137d+1
      rkTinvAinv(2,3) =  1.789135380979465422050817815017383d0
      rkTinvAinv(3,1) = -4.160768067752685525282947313530352d0
      rkTinvAinv(3,2) =  1.124128569859216916690209918405860d0
      rkTinvAinv(3,3) =  1.700644430961823796581896350418417d0

      rkAinvT(1,1) = 1.543510591072668287198054583233180d0
      rkAinvT(1,2) = -2.460228411937788329157493833295004d0
      rkAinvT(1,3) = -.412906170450356277003910443520499d0
      rkAinvT(2,1) = .209519643211838264029272585946993d0
      rkAinvT(2,2) = 1.388545667194387164417459732995766d0
      rkAinvT(2,3) = 1.20339553005832004974976023130002d0
      rkAinvT(3,1) = 3.637834252744495732208418513577775d0
      rkAinvT(3,2) = 2.681082873627752133895790743211112d0
      rkAinvT(3,3) = -3.050430199247410569426377624787569d0

  END SUBROUTINE Radau1A_Coefficients

  
!~~~~~~~~~~~~~~~~~~~~~~~~~~~~~~~~~~~~~~~~~~~~~~~~~~~~~~~~~
  END SUBROUTINE RungeKuttaADJ ! and all its internal procedures
!~~~~~~~~~~~~~~~~~~~~~~~~~~~~~~~~~~~~~~~~~~~~~~~~~~~~~~~~~

!~~~~~~~~~~~~~~~~~~~~~~~~~~~~~~~~~~~~~~~~~~~~~~~~~~~~~~~~~
  SUBROUTINE FUN_CHEM(T, V, FCT)
!~~~~~~~~~~~~~~~~~~~~~~~~~~~~~~~~~~~~~~~~~~~~~~~~~~~~~~~~~

    USE KPP_ROOT_Parameters
    USE KPP_ROOT_Global
    USE KPP_ROOT_Function, ONLY: Fun
    USE KPP_ROOT_Rates, ONLY: Update_SUN, Update_RCONST, Update_PHOTO

    IMPLICIT NONE

    KPP_REAL :: V(NVAR), FCT(NVAR)
    KPP_REAL :: T, Told

    Told = TIME
    TIME = T
    CALL Update_SUN()
    CALL Update_RCONST()
    CALL Update_PHOTO()
    TIME = Told
    
    CALL Fun(V, FIX, RCONST, FCT)
    
  END SUBROUTINE FUN_CHEM


!~~~~~~~~~~~~~~~~~~~~~~~~~~~~~~~~~~~~~~~~~~~~~~~~~~~~~~~~~
  SUBROUTINE JAC_CHEM (T, V, JF)
!~~~~~~~~~~~~~~~~~~~~~~~~~~~~~~~~~~~~~~~~~~~~~~~~~~~~~~~~~

    USE KPP_ROOT_Parameters
    USE KPP_ROOT_Global
    USE KPP_ROOT_JacobianSP
    USE KPP_ROOT_Jacobian, ONLY: Jac_SP
    USE KPP_ROOT_Rates, ONLY: Update_SUN, Update_RCONST, Update_PHOTO

    IMPLICIT NONE

    KPP_REAL :: V(NVAR), T , Told
#ifdef FULL_ALGEBRA    
    KPP_REAL :: JV(LU_NONZERO), JF(NVAR,NVAR)
    INTEGER       :: i, j 
#else
    KPP_REAL :: JF(LU_NONZERO)
#endif   

    Told = TIME
    TIME = T
    CALL Update_SUN()
    CALL Update_RCONST()
    CALL Update_PHOTO()
    TIME = Told
    
#ifdef FULL_ALGEBRA    
    CALL Jac_SP(V, FIX, RCONST, JV)
    DO j=1,NVAR
      DO i=1,NVAR
         JF(i,j) = 0.0d0
      END DO
    END DO
    DO i=1,LU_NONZERO
       JF(LU_IROW(i),LU_ICOL(i)) = JV(i)
    END DO
#else
    CALL Jac_SP(V, FIX, RCONST, JF) 
#endif   

  END SUBROUTINE JAC_CHEM


!~~~~~~~~~~~~~~~~~~~~~~~~~~~~~~~~~~~~~~~~~~~~~~~~~~~~~~~~

END MODULE KPP_ROOT_Integrator
