# Supplementary material for: The atmospheric chemistry box model CAABA/MECCA-3.0
Source: Copernicus journal article supplement (doi:10.5194/gmd-4-373-2011), 2011-05-06
Supplement: Supplementary file 9 [file gmd-4-373-2011-supplement.zip › caaba_3.0/mecca/kpp/int/sdirk.c]

#define MAX(a,b) ( ((a) >= (b)) ?(a):(b)  )
#define MIN(b,c) ( ((b) <  (c)) ?(b):(c)  )
#define ABS(x)   ( ((x) >=  0 ) ?(x):(-x) )
#define SQRT(d)  ( pow((d),0.5)  )
#define SIGN(x,y)( ( (x*y) >= 0 ) ?(x):(-x) )/* Sign transfer function */
#define MOD(A,B) (int)((A)%(B))

/* ~~~> Numerical constants    */
#define  ZERO     (KPP_REAL)0.0
#define  ONE      (KPP_REAL)1.0

/* ~~~>  Statistics on the work performed by the SDIRK method */
#define  Nfun 1
#define  Njac 2
#define  Nstp 3
#define  Nacc 4
#define  Nrej 5
#define  Ndec 6
#define  Nsol 7
#define  Nsng 8
#define  Ntexit 1
#define  Nhexit 2
#define  Nhnew 3

/*~~~>  SDIRK method coefficients, up to 5 stages    */
#define Smax 5

int S2A=1,
	S2B=2,
	S3A=3, 
	S4A=4, 
	S4B=5;

int sdMethod, 
	rkS;

KPP_REAL rkGamma, 
	rkA[Smax][Smax], 
	rkB[Smax], 
	rkELO, 
	rkBhat[Smax],
	rkC[Smax], 
	rkD[Smax], 
	rkE[Smax], 
	rkTheta[Smax][Smax], 
	rkAlpha[Smax][Smax];

/*~~~> Function headers     */
//void INTEGRATE(KPP_REAL TIN, KPP_REAL TOUT, int ICNTRL_U[], KPP_REAL RCNTRL_U[],
//	int ISTATUS_U[], KPP_REAL RSTATUS_U[], int Ierr);
void INTEGRATE(KPP_REAL TIN, KPP_REAL TOUT);
int SDIRK(int N, KPP_REAL Tinitial, KPP_REAL Tfinal, KPP_REAL Y[], 
	KPP_REAL RelTol[], KPP_REAL AbsTol[], KPP_REAL RCNTRL[], int ICNTRL[], 
	KPP_REAL RSTATUS[], int ISTATUS[]);
int SDIRK_Integrator(int N, KPP_REAL Tinitial, KPP_REAL Tfinal, KPP_REAL Y[], 
	int Ierr, KPP_REAL Hstart, KPP_REAL Hmin, KPP_REAL Hmax, KPP_REAL Roundoff, 
	KPP_REAL AbsTol[], KPP_REAL RelTol[], int ISTATUS[], KPP_REAL RSTATUS[],
	int ITOL, int Max_no_steps, int StartNewton, KPP_REAL NewtonTol, 
	KPP_REAL ThetaMin, KPP_REAL FacSafe, KPP_REAL FacMin, KPP_REAL FacMax,
	KPP_REAL FacRej, KPP_REAL Qmin, KPP_REAL Qmax, int NewtonMaxit);
void SDIRK_ErrorScale(int N, int ITOL, KPP_REAL AbsTol[], KPP_REAL RelTol[],
	KPP_REAL Y[], KPP_REAL SCAL[]);
KPP_REAL SDIRK_ErrorNorm(int N, KPP_REAL Y[], KPP_REAL SCAL[]);
int SDIRK_ErrorMsg(int code, KPP_REAL T, KPP_REAL H, int Ierr);
void SDIRK_PrepareMatrix(KPP_REAL H, KPP_REAL T, KPP_REAL Y[], KPP_REAL FJAC[], 
	int SkipJac, int SkipLU, KPP_REAL E[], int IP[], int Reject, 
	int ISING, int ISTATUS[]);
void SDIRK_Solve(KPP_REAL H, int N, KPP_REAL E[], int IP[], int ISING, 
	KPP_REAL RHS[], int ISTATUS[]);
void Sdirk4a(void);
void Sdirk4b(void);
void Sdirk2a(void);
void Sdirk2b(void);
void Sdirk3a(void);
void FUN_CHEM(KPP_REAL T, KPP_REAL Y[], KPP_REAL P[]);
void JAC_CHEM(KPP_REAL T, KPP_REAL Y[], KPP_REAL JV[]);
void Fun(KPP_REAL Y[], KPP_REAL FIX[], KPP_REAL RCONST[], KPP_REAL Ydot[]);
void Jac_SP(KPP_REAL Y[], KPP_REAL FIX[], KPP_REAL RCONST[], KPP_REAL Ydot[]);
void WAXPY(int N, KPP_REAL Alpha, KPP_REAL X[], int incX, KPP_REAL Y[], int incY);
void WSCAL(int N, KPP_REAL Alpha, KPP_REAL X[], int incX);
KPP_REAL WLAMCH(char C);
void WADD(int N, KPP_REAL Y[], KPP_REAL Z[], KPP_REAL TMP[]);
void Set2Zero(int N, KPP_REAL Y[]);
void KppSolve(KPP_REAL A[], KPP_REAL b[]);
int KppDecomp(KPP_REAL A[]);
void Update_SUN();
void Update_RCONST();

/*~~~~~~~~~~~~~~~~~~~~~~~~~~~~~~~~~~~~~~~~~~~~~~~~~~~~~~~~~~~~~~~~~~~~~~*/
//void INTEGRATE(KPP_REAL TIN, KPP_REAL TOUT, int ICNTRL_U[], KPP_REAL RCNTRL_U[],
//		int ISTATUS_U[], KPP_REAL RSTATUS_U[], int Ierr_U)
void INTEGRATE(KPP_REAL TIN, KPP_REAL TOUT)
/*~~~~~~~~~~~~~~~~~~~~~~~~~~~~~~~~~~~~~~~~~~~~~~~~~~~~~~~~~~~~~~~~~~~~~~*/
{

/* int Ntotal = 0; *//* Used for debug option below to print the number of steps */
KPP_REAL RCNTRL[20], 
	RSTATUS[20], 
	T1, 
	T2;
	
int ICNTRL[20], 
	ISTATUS[20], 
	Ierr;

Ierr = 0;

int i;
for(i=0; i<20; i++) {
	ICNTRL[i] = 0;
	RCNTRL[i] = (KPP_REAL)0.0;
	ISTATUS[i] = 0;
	RSTATUS[i] = (KPP_REAL)0.0;
} /* end for */

/*~> fine-tune the integrator: */
ICNTRL[1] = 0; /* 0 - vector tolerances, 1 - scalar tolerances */
ICNTRL[5] = 0; /* starting values of N. iter.: interpolated 0), zero (1) */

///* If optional parameters are given, and if they are >0, 
//	then they overwrite default settings. */
//if(ICNTRL_U != NULL) { /* Check to see if ICNTRL_U is not NULL */
//	for(i=0; i<20; i++) {
//		if(ICNTRL_U[i] > 0) {
//			ICNTRL[i] = ICNTRL_U[i];
//		} /* end if */
//	} /* end for */
//} /* end if */
//
//if(RCNTRL_U != NULL) { /* Check to see if RCNTRL_U is not NULL */
//	for(i=0; i<20; i++) {
//		if(RCNTRL_U[i] > 0) {
//			RCNTRL[i] = RCNTRL_U[i];
//		} /* end if */
//	} /* end for */
//} /* end if */


T1 = TIN;
T2 = TOUT;
Ierr = SDIRK( NVAR, T1, T2, VAR, RTOL, ATOL, RCNTRL, ICNTRL, RSTATUS,
	ISTATUS);


/*~~~> Debug option: print number of steps
   Ntotal += ISTATUS[Nstp]; */

if(Ierr < 0) {
	printf("SDIRK: Unsuccessful exit at T=%f(Ierr=%d)", TIN, Ierr);
}

///*if optional parameters are given for output they to return information */
//if(ISTATUS_U != NULL) { /* Check to see if ISTATUS_U is not NULL */
//	for(i=0; i<20; i++) {
//		ISTATUS_U[i] = ISTATUS[i];
//	} /* end for */
//} /* end if */
//
//if(RSTATUS_U != NULL) { /* Check to see if RSTATUS_U is not NULL */
//	for(i=0; i<20; i++) {
//		RSTATUS_U[i] = RSTATUS[i];
//	} /* end for */
//} /* end if */
//
//Ierr_U = Ierr;

}

/*~~~~~~~~~~~~~~~~~~~~~~~~~~~~~~~~~~~~~~~~~~~~~~~~~~~~~~~~~~~~~~~~*/
int SDIRK(int N, KPP_REAL Tinitial, KPP_REAL Tfinal, KPP_REAL Y[],
	KPP_REAL RelTol[], KPP_REAL AbsTol[], KPP_REAL RCNTRL[],
	int ICNTRL[], KPP_REAL RSTATUS[], int ISTATUS[])
/*~~~~~~~~~~~~~~~~~~~~~~~~~~~~~~~~~~~~~~~~~~~~~~~~~~~~~~~~~~~~~~~~

    Solves the system y'=F(t,y) using a Singly-Diagonally-Implicit
    Runge-Kutta (SDIRK) method.

    This implementation is based on the book and the code Sdirk4:

    E. Hairer and G. Wanner
    "Solving ODEs II. Stiff and differential-algebraic problems".
    Springer series in computational mathematics, Springer-Verlag, 1996.
    This code is based on the SDIRK4 routine in the above book.

    Methods:
        * Sdirk 2a, 2b: L-stable, 2 stages, order 2
        * Sdirk 3a:     L-stable, 3 stages, order 2, adjoint-invariant
        * Sdirk 4a, 4b: L-stable, 5 stages, order 4

    (C)  Adrian Sandu, July 2005
    Virginia Polytechnic Institute and State University
    Contact: sandu@cs.vt.edu
    Revised by Philipp Miehe and Adrian Sandu, May 2006
    Translation F90 to C by Paul Eller and Nicholas Hobbs, July 2006
    This implementation is part of KPP - the Kinetic PreProcessor
~~~~~~~~~~~~~~~~~~~~~~~~~~~~~~~~~~~~~~~~~~~~~~~~~~~~~~~~~~~~~~~~~~~~~~

~~~>  INPUT ARGUMENTS:

   -     Y[NVAR]    = vector of initial conditions (at T=Tinitial)
   -    [Tinitial,Tfinal]  = time range of integration
        (if Tinitial>Tfinal the integration is performed backwards in time)
   -    RelTol, AbsTol = user precribed accuracy
   - SUBROUTINE ode_Fun( T, Y, Ydot ) = ODE function,
        returns Ydot = Y' = F(T,Y)
   - SUBROUTINE ode_Fun( T, Y, Ydot ) = Jacobian of the ODE function,
        returns Jcb = dF/dY
   -    ICNTRL[1:20]    = integer inputs parameters
   -    RCNTRL[1:20]    = real inputs parameters
~~~~~~~~~~~~~~~~~~~~~~~~~~~~~~~~~~~~~~~~~~~~~~~~~~~~~~~~~~~~~~~~~~~~~

~~~>  OUTPUT ARGUMENTS:

   -    Y[NVAR]         -> vector of final states (at T->Tfinal)
   -    ISTATUS[1:20]   -> integer output parameters
   -    RSTATUS[1:20]   -> real output parameters
   -    Ierr            -> job status upon return
                           success (positive value) or
                           failure (negative value)
~~~~~~~~~~~~~~~~~~~~~~~~~~~~~~~~~~~~~~~~~~~~~~~~~~~~~~~~~~~~~~~~~~~~~~
~~~>  INPUT PARAMETERS:
    Note: For input parameters equal to zero the default values of the
       corresponding variables are used.

    Note: For input parameters equal to zero the default values of the
       corresponding variables are used.
~~~>
    ICNTRL[0] = not used
    ICNTRL[1] = 0: AbsTol, RelTol are NVAR-dimensional vectors
                                           = 1: AbsTol, RelTol are scalars
    ICNTRL[2] = Method
    ICNTRL[3]  -> maximum number of integration steps
            For ICNTRL[3]=0 the default value of 100000 is used
    ICNTRL[4]  -> maximum number of Newton iterations
        For ICNTRL(4)=0 the default value of 8 is used
    ICNTRL[5]  -> starting values of Newton iterations:
    ICNTRL[5]=0 : starting values are interpolated (the default)
    ICNTRL[5]=1 : starting values are zero

~~~>  Real parameters

    RCNTRL[0]  -> Hmin, lower bound for the integration step size
                  It is strongly recommended to keep Hmin = ZERO
    RCNTRL[1]  -> Hmax, upper bound for the integration step size
    RCNTRL[2]  -> Hstart, starting value for the integration step size
    RCNTRL[3]  -> FacMin, lower bound on step decrease factor (default=0.2)
    RCNTRL[4]  -> FacMax, upper bound on step increase factor (default=6)
    RCNTRL[5]  -> FacRej, step decrease factor after multiple rejections
                  (default=0.1)
    RCNTRL[6]  -> FacSafe, by which the new step is slightly smaller
                  than the predicted value  (default=0.9)
    RCNTRL[7]  -> ThetaMin. If Newton convergence rate smaller
                  than ThetaMin the Jacobian is not recomputed;
                  (default=0.001)
    RCNTRL[8]  -> NewtonTol, stopping criterion for Newton's method
                  (default=0.03)
    RCNTRL[9]  -> Qmin
    RCNTRL[10] -> Qmax. If Qmin < Hnew/Hold < Qmax, then the
                  step size is kept constant and the LU factorization
                  reused (default Qmin=1, Qmax=1.2)
~~~~~~~~~~~~~~~~~~~~~~~~~~~~~~~~~~~~~~~~~~~~~~~~~~~~~~~~~~~~~~~~~~~~~~
~~~>  OUTPUT PARAMETERS:
   Note: each call to Rosenbrock adds the current no. of fcn calls
   to previous value of ISTATUS(1), and similar for the other params.
   Set ISTATUS(1:10) = 0 before call to avoid this accumulation.
  ISTATUS[0] = No. of function calls
  ISTATUS[1] = No. of jacobian calls
  ISTATUS[2] = No. of steps
  ISTATUS[3] = No. of accepted steps
  ISTATUS[4] = No. of rejected steps (except at the beginning)
  ISTATUS[5] = No. of LU decompositions
  ISTATUS[6] = No. of forward/backward substitutions
  ISTATUS[7] = No. of singular matrix decompositions
  RSTATUS[0]  -> Texit, the time corresponding to the computed Y upon return
  RSTATUS[1]  -> Hexit,last accepted step before return
  RSTATUS[2]  -> Hnew, last predicted step before return
  For multiple restarts, use Hnew as Hstart in the following run

~~~~~~~~~~~~~~~~~~~~~~~~~~~~~~~~~~~~~~~~~~~~~~~~~~~~~~~~~~~~~~~~~~~~~~*/
{ 

int Max_no_steps=0;

/*~~~> Local variables      */
int StartNewton;

KPP_REAL  Hmin=0,
	Hmax=0,
	Hstart=0,
	Roundoff,
	FacMin=0,
	FacMax=0,
	FacSafe=0,
	FacRej=0,
	ThetaMin,
	NewtonTol,
	Qmin,
	Qmax;

int ITOL,
	NewtonMaxit,
	i,
	Ierr = 0;

/*~~~>  For Scalar tolerances (ICNTRL[1] !=0 )  the code uses AbsTol[1] and RelTol[1)
    For Vector tolerances (ICNTRL[1] == 0) the code uses AbsTol[1:NVAR] and RelTol[1:NVAR] */
if (ICNTRL[1]==0){
	ITOL = 1;
}
else {
	ITOL = 0;
}  /* end if */

/*~~~> ICNTRL[3] - method selection   */

switch (ICNTRL[2]) {

case 0: Sdirk2a();
	break;

case 1: Sdirk2a();
	break;

case 2: Sdirk2b();
	break;

case 3: Sdirk3a();
	break;

case 4: Sdirk4a();
	break;

case 5: Sdirk4b();
	break;

default: Sdirk2a();

} /* end switch */

/*~~~>   The maximum number of time steps admitted   */
if (ICNTRL[3] == 0) {
	Max_no_steps = 200000;
}
else if (ICNTRL[3] > 0) {
	Max_no_steps = ICNTRL[3];
}
else {
	printf("User-selected ICNTRL(4)=%d", ICNTRL[3]);
	SDIRK_ErrorMsg(-1,Tinitial,ZERO,Ierr);
} /*end if */

/*~~~>The maximum number of Newton iterations admitted */
if(ICNTRL[4]==0) {
	NewtonMaxit = 8;
}
else {
	NewtonMaxit=ICNTRL[4];
	if(NewtonMaxit <=0) {
		printf("User-selected ICNTRL(5)=%d", ICNTRL[4] );
		SDIRK_ErrorMsg(-2,Tinitial,ZERO,Ierr);
	}
}

/*~~~> StartNewton: Extrapolate for starting values of Newton iterations */
if (ICNTRL[5] == 0) {
	StartNewton = 1;
}
else {
	StartNewton = 0;
} /* end if */

/*~~~>  Unit roundoff (1+Roundoff>1) */
Roundoff = WLAMCH('E');

/*~~~>  Lower bound on the step size: (positive value) */
if (RCNTRL[0] == ZERO) {
	Hmin = ZERO;
}
else if (RCNTRL[0] > ZERO) {
	Hmin = RCNTRL[0];
}
else {
	printf("User-selected RCNTRL[0]=%f", RCNTRL[0]);
	SDIRK_ErrorMsg(-3,Tinitial,ZERO,Ierr);
} /* end if */

/*~~~>  Upper bound on the step size: (positive value) */
if (RCNTRL[1] == ZERO) {
	Hmax = ABS(Tfinal-Tinitial);
}
else if (RCNTRL[1] > ZERO) {
	Hmax = MIN( ABS(RCNTRL[1]), ABS(Tfinal-Tinitial) );
}
else {
	printf("User-selected RCNTRL[1]=%f", RCNTRL[1]);
	SDIRK_ErrorMsg(-3,Tinitial,ZERO,Ierr);
} /* end if */

/*~~~>  Starting step size: (positive value) */
if (RCNTRL[2] == ZERO) {
	Hstart = MAX( Hmin, Roundoff);
}
else if (RCNTRL[2] > ZERO) {
	Hstart = MIN( ABS(RCNTRL[2]), ABS(Tfinal-Tinitial) );
}
else {
	printf("User-selected Hstart: RCNTRL[2]=%f", RCNTRL[2]);
	SDIRK_ErrorMsg(-3,Tinitial,ZERO,Ierr);
} /* end if */

/*~~~>  Step size can be changed s.t.  FacMin < Hnew/Hexit < FacMax */
if (RCNTRL[3] == ZERO) {
	FacMin = (KPP_REAL)0.2;
}
else if (RCNTRL[3] > ZERO) {
	FacMin = RCNTRL[3];
}
else {
	printf("User-selected FacMin: RCNTRL[3]=%f", RCNTRL[3]);
	SDIRK_ErrorMsg(-4,Tinitial,ZERO,Ierr);
} /* end if */

if (RCNTRL[4] == ZERO) {
	FacMax = (KPP_REAL)10.0;
}
else if (RCNTRL[4] > ZERO) {
	FacMax = RCNTRL[4];
}
else {
	printf("User-selected FacMax: RCNTRL[4]=%f", RCNTRL[4]);
	SDIRK_ErrorMsg(-4,Tinitial,ZERO,Ierr);
} /* end if */

/*~~~>   FacRej: Factor to decrease step after 2 succesive rejections */
if (RCNTRL[5] == ZERO) {
	FacRej = (KPP_REAL)0.1;
}
else if (RCNTRL[5] > ZERO) {
	FacRej = RCNTRL[5];
}
else {
	printf("User-selected FacRej: RCNTRL[5]=%f", RCNTRL[5]);
	SDIRK_ErrorMsg(-4,Tinitial,ZERO,Ierr);
} /*end if */

/* ~~~>   FacSafe: Safety Factor in the computation of new step size  */
if (RCNTRL[6] == ZERO) {
	FacSafe = (KPP_REAL)0.9;
}
else if (RCNTRL[6] > ZERO) {
	FacSafe = RCNTRL[6];
}
else {
	printf("User-selected FacSafe: RCNTRL[6]=%f", RCNTRL[6]);
	SDIRK_ErrorMsg(-4,Tinitial,ZERO,Ierr);
} /* end if */

/*~~~> ThetaMin: decides whether the Jacobian should be recomputed */
if (RCNTRL[7] == ZERO) {
	ThetaMin = (KPP_REAL)1.0e-03;
}
else {
	ThetaMin = RCNTRL[7];
} /* end if */

/*~~~> Stopping criterion for Newton's method */
if (RCNTRL[8] == ZERO) {
	NewtonTol = (KPP_REAL)3.0e-02;
}
else {
	NewtonTol = RCNTRL[8];
} /* end if */

/* ~~~> Qmin, Qmax: IF Qmin < Hnew/Hold < Qmax, STEP SIZE = CONST. */
if (RCNTRL[9] == ZERO) {
	Qmin = ONE;
}
else {
	Qmin = RCNTRL[9];
} /* end if */

if (RCNTRL[10] == ZERO) {
	Qmax = (KPP_REAL)1.2;
}
else {
	Qmax = RCNTRL [10];
} /* end if */

/* ~~~>  Check if tolerances are reasonable */
if (ITOL == 0) {
	if ((AbsTol[0]<=ZERO || RelTol[0])<=(((KPP_REAL)10.0)*Roundoff)) {
		SDIRK_ErrorMsg(-5,Tinitial,ZERO,Ierr);
	} /* end internal if */
}
else {
	for (i = 0; i < N; i++) {
		if((AbsTol[i]<=ZERO)||(RelTol[i]<=((KPP_REAL)10.0)*Roundoff)){
			SDIRK_ErrorMsg(-5,Tinitial,ZERO,Ierr);
		} /* end internal if */
	} /* end for */
} /* end if */

if (Ierr < 0) {
	return Ierr;
} /*end if */

Ierr = SDIRK_Integrator(N, Tinitial, Tfinal, Y, Ierr, Hstart, Hmin, Hmax,
	Roundoff, AbsTol, RelTol, ISTATUS, RSTATUS, ITOL, Max_no_steps,
	StartNewton, NewtonTol, ThetaMin, FacSafe, FacMin, FacMax, FacRej,
	Qmin, Qmax, NewtonMaxit);

return Ierr;

}  /* end of main SDIRK function */

/*~~~~~~~~~~~~~~~~~~~~~~~~~~~~~~~~~~~~~~~~~~~~~~~~~~~~~~~~~~~~~~~~*/
int SDIRK_Integrator(int N, KPP_REAL Tinitial, KPP_REAL Tfinal, KPP_REAL Y[], 
	int Ierr, KPP_REAL Hstart, KPP_REAL Hmin, KPP_REAL Hmax, KPP_REAL Roundoff,
	KPP_REAL AbsTol[], KPP_REAL RelTol[], int ISTATUS[], KPP_REAL RSTATUS[],
	int ITOL, int Max_no_steps, int StartNewton, KPP_REAL NewtonTol,
	KPP_REAL ThetaMin, KPP_REAL FacSafe, KPP_REAL FacMin, KPP_REAL FacMax,
	KPP_REAL FacRej, KPP_REAL Qmin, KPP_REAL Qmax, int NewtonMaxit)
/*~~~~~~~~~~~~~~~~~~~~~~~~~~~~~~~~~~~~~~~~~~~~~~~~~~~~~~~~~~~~~~~~*/
{

/*~~~> Local variables:    */
KPP_REAL Z[Smax][NVAR],
	G[NVAR],
	TMP[NVAR],
	NewtonRate,
	SCAL[NVAR],
	RHS[NVAR],
	T,
	H,
	Theta=0,
	Hratio,
	NewtonPredictedErr,
	Qnewton,
	Err=0,
	Fac,
	Hnew,
	Tdirection,
	NewtonIncrement=0,
	NewtonIncrementOld=0;

int IER=0,
	istage,
	NewtonIter,
	IP[NVAR],
	Reject,
	FirstStep,
	SkipJac,
	SkipLU,
	NewtonDone,
	CycleTloop,
	i,
	j;

#ifdef FULL_ALGEBRA
	KPP_REAL FJAC[NVAR][NVAR];
	KPP_REAL E[NVAR][NVAR];
#else
	KPP_REAL FJAC[LU_NONZERO];
	KPP_REAL E[LU_NONZERO];
#endif

/*~~~~~~~~~~~~~~~~~~~~~~~~~~~~~~~~~~~~~*/
/*~~~~>   Initializations              */
/*~~~~~~~~~~~~~~~~~~~~~~~~~~~~~~~~~~~~~*/
T = Tinitial;
Tdirection = SIGN(ONE, Tfinal-Tinitial);
H = MAX(ABS(Hmin), ABS(Hstart));

if(ABS(H) <= ((KPP_REAL)10.0 * Roundoff)) {
	H = (KPP_REAL)(1.0e-06);
} /* end if */

H = MIN(ABS(H), Hmax);
H = SIGN(H, Tdirection);
SkipLU = 0;
SkipJac = 0;
Reject = 0;
FirstStep = 1;
CycleTloop = 0;

SDIRK_ErrorScale(N, ITOL, AbsTol, RelTol, Y, SCAL);

/*~~~~~~~~~~~~~~~~~~~~~~~~~~~~~~~~~~~~~~*/
/*~~~>  Time loop begins                */
/*~~~~~~~~~~~~~~~~~~~~~~~~~~~~~~~~~~~~~~*/
while((Tfinal-T)*Tdirection - Roundoff > ZERO) {  /* Tloop */

/*~~~>  Compute E = 1/(h*gamma)-Jac and its LU decomposition */
	if(SkipLU == 0) { /* This time around skip the Jac update and LU */
		SDIRK_PrepareMatrix(H, T, Y, FJAC, SkipJac, SkipLU, E, IP, 
			Reject, IER, ISTATUS);
		if(IER != 0) {
			SDIRK_ErrorMsg(-8, T, H, Ierr);
		return Ierr;
		} /* end if */
	} /* end if */

	if(ISTATUS[Nstp] > Max_no_steps) {
		SDIRK_ErrorMsg(-6, T, H, Ierr);
		return Ierr;
	} /* end if */

	if((T + ((KPP_REAL)0.1) * H == T) || (ABS(H) <= Roundoff)) {
		SDIRK_ErrorMsg(-7, T, H, Ierr);
		return Ierr;
	} /* end if */

/*stages*/ for(istage=0; istage < rkS; istage++) {
		/*~~~~~~~~~~~~~~~~~~~~~~~~~~~~~~~~~~~~~~~~~~~~*/
		/*~~~>  Simplified Newton iterations          */
		/*~~~~~~~~~~~~~~~~~~~~~~~~~~~~~~~~~~~~~~~~~~~~*/

		/*~~~>  Starting values for Newton iterations */
		Set2Zero(N, &Z[istage][0]);

	/*~~~>   Prepare the loop-independent part of the right-hand side */
		Set2Zero(N, G);
			if(istage > 0) {
				for(j=0; j < istage; j++) {
         				 WAXPY(N, rkTheta[j][istage], 
						&Z[j][0], 1, G, 1);
					if(StartNewton == 1) {
						WAXPY(N, rkAlpha[j][istage],
							&Z[j][0], 1, 
							&Z[istage][0], 1);
					} /* end if */
				} /* end for */
			} /* end if */

	/*~~~>  Initializations for Newton iteration */
		NewtonDone = 0; /* false */
		Fac = (KPP_REAL)0.5; /* Step reduction factor */

/*NewtonLoop*/	for(NewtonIter=0; NewtonIter<NewtonMaxit; NewtonIter++ ) {

        /*~~~>  Prepare the loop-dependent part of the right-hand side */
			WADD(N, Y, &Z[istage][0], TMP);
			FUN_CHEM(T+rkC[istage]*H, TMP, RHS);
			ISTATUS[Nfun]++;
			WSCAL(N, H*rkGamma, RHS, 1);
			WAXPY(N, -ONE, &Z[istage][0], 1, RHS, 1);
			WAXPY(N, ONE, G, 1, RHS, 1 );

	        /*~~~>   Solve the linear system  */
			SDIRK_Solve(H, N, E, IP, IER, RHS, ISTATUS);

		/*~~~>   Check convergence of Newton iterations */
			NewtonIncrement = SDIRK_ErrorNorm(N, RHS, SCAL);

			if(NewtonIter == 0) {
				Theta = ABS(ThetaMin);
				NewtonRate = (KPP_REAL)2.0;
			}
			else {
				Theta = NewtonIncrement/NewtonIncrementOld;

				if(Theta < (KPP_REAL)0.99) {
					NewtonRate = Theta/(ONE-Theta);
			/* Predict error at the end of Newton process */
					NewtonPredictedErr = 	
						(NewtonIncrement*pow(Theta,
						(NewtonMaxit - (NewtonIter +
						1)) / (ONE - Theta)));
					if(NewtonPredictedErr >= NewtonTol) {
		              /* Non-convergence of Newton: 
				predicted error too large*/
						Qnewton = MIN((KPP_REAL)10.0,
							NewtonPredictedErr/
							NewtonTol);
						Fac = (KPP_REAL)0.8 * pow
							(Qnewton, (-ONE / (1
							+ NewtonMaxit -
							NewtonIter + 1)));
						break;
					} /* end internal if */
				}
				else  /* Non-convergence of Newton: 
					Theta too large */ {
					break;
				} /* end internal if else */
			} /* end if else */

			NewtonIncrementOld = NewtonIncrement;

		/* Update solution: Z(:) <-- Z(:)+RHS(:) */
			WAXPY(N, ONE, RHS, 1, &Z[istage][0], 1);

		/* Check error in Newton iterations */
			NewtonDone=(NewtonRate*NewtonIncrement<=NewtonTol);

		        if(NewtonDone == 1) {
				break;
			}
		} /* end NewtonLoop for */

		if(NewtonDone == 0) {
		/* CALL RK_ErrorMsg(-12,T,H,Ierr); */
			H = Fac*H;
			Reject = 1; /* true */
			SkipJac = 1;/* true */
			SkipLU = 0;/* false */
			CycleTloop = 1; /* cycle Tloop */
		} /* end if */

		if(CycleTloop == 1) {
			CycleTloop=0;
			break;
		}
	} /* end stages for */

	if(CycleTloop==0) {

/*~~~~~~~~~~~~~~~~~~~~~~~~~~~~*/
/*~~~>  Error estimation      */
/*~~~~~~~~~~~~~~~~~~~~~~~~~~~~*/
	ISTATUS[Nstp]++;
	Set2Zero(N, TMP);

	for(i=0; i<rkS; i++) {
		if(rkE[i] != ZERO) {
			WAXPY(N, rkE[i], &Z[i][0], 1, TMP, 1);
		} /* end if */
	} /* end for */

	SDIRK_Solve(H, N, E, IP, IER, TMP, ISTATUS);
	Err = SDIRK_ErrorNorm(N, TMP, SCAL);

/*~~~~> Computation of new step size Hnew */
	Fac = FacSafe * pow((Err), (-ONE/rkELO));
	Fac = MAX(FacMin, MIN(FacMax, Fac));
	Hnew = H*Fac;

/*~~~~~~~~~~~~~~~~~~~~~~~~~~~~*/
/*~~~>  Accept/Reject step    */
/*~~~~~~~~~~~~~~~~~~~~~~~~~~~~*/

	if(Err < ONE) { /*~~~> Step is accepted */
		FirstStep = 0; /* false */
		ISTATUS[Nacc]++;

	/*~~~> Update time and solution */
		T = T + H;

        /* Y(:) <-- Y(:) + Sum_j rkD(j)*Z_j(:) */
		for(i=0; i<rkS; i++) {
			if(rkD[i] != ZERO) {
				WAXPY(N, rkD[i], &Z[i][0], 1, Y, 1);
			} /* end if */
		} /* end for */

	/*~~~> Update scaling coefficients */
		SDIRK_ErrorScale(N, ITOL, AbsTol, RelTol, Y, SCAL);

	/*~~~> Next time step */
		Hnew = Tdirection*MIN(ABS(Hnew), Hmax);

	/* Last T and H */
		RSTATUS[Ntexit] = T;
		RSTATUS[Nhexit] = H;
		RSTATUS[Nhnew] = Hnew;

	/* No step increase after a rejection */
		if(Reject==1) {
			Hnew = Tdirection*MIN(ABS(Hnew), ABS(H));
		} /* end if */

		Reject = 0; /* false */

		if((T+Hnew/Qmin-Tfinal)*Tdirection > ZERO) {
			H = Tfinal-T;
		}
		else {
			Hratio = Hnew/H;
		/* If step not changed too much keep Jacobian and reuse LU */
			SkipLU = ((Theta <= ThetaMin) && (Hratio >= Qmin) && 
				(Hratio <= Qmax));

			if(SkipLU==0) {
				H = Hnew;
			} /* end internal if */
		} /* end if else */

		SkipJac = (Theta <= ThetaMin);
		SkipJac = 0; /* false */
		}
		else { /*~~~> Step is rejected */
			if((FirstStep==1) || (Reject==1)) {
				H = FacRej * H;
			}
			else {
				H = Hnew;
			} /* end internal if */

			Reject = 1;
			SkipJac = 1;
			SkipLU = 0;

			if(ISTATUS[Nacc] >=1) {
				ISTATUS[Nrej]++;
			} /* end if */
		} /* end if else */
	} /* end CycleTloop if */
} /* end Tloop */

/* Successful return */
Ierr = 1;
return Ierr;

} /* end SDIRK_Integrator */

/*~~~~~~~~~~~~~~~~~~~~~~~~~~~~~~~~~~~~~~~~~~~~~~~~~~~~~~~~~~~~~~~~*/
void SDIRK_ErrorScale(int N, int ITOL, KPP_REAL AbsTol[], KPP_REAL RelTol[],
			KPP_REAL Y[],KPP_REAL SCAL[])
/*~~~~~~~~~~~~~~~~~~~~~~~~~~~~~~~~~~~~~~~~~~~~~~~~~~~~~~~~~~~~~~~~*/
{

int i;
if (ITOL == 0){
	for (i = 0; i < NVAR; i++){
		SCAL[i] = ONE / (AbsTol[0]+RelTol[0]*ABS(Y[i]) );
	} /* end for */
}
else {
	for (i = 0; i < NVAR; i++){
		SCAL[i] = ONE / (AbsTol[i]+RelTol[i]*ABS(Y[i]) );
	} /*  end for  */
} /*  end if  */

} /*  end SDIRK_ErrorScale  */

/*~~~~~~~~~~~~~~~~~~~~~~~~~~~~~~~~~~~~~~~~~~~~~~~~~~~~~~~~~~~~~~~~*/
KPP_REAL SDIRK_ErrorNorm(int N, KPP_REAL Y[], KPP_REAL SCAL[])
/*~~~~~~~~~~~~~~~~~~~~~~~~~~~~~~~~~~~~~~~~~~~~~~~~~~~~~~~~~~~~~~~~*/
{

int i;
KPP_REAL Err = ZERO;

for (i = 0; i < N; i++) {
	Err = Err + pow( (Y[i]*SCAL[i]), 2);
} /* end for */

Err = MAX( SQRT(Err/(KPP_REAL)N), (KPP_REAL)1.0e-10);

return Err;

} /*  end SDIRK_ErrorNorm  */

/*~~~~~~~~~~~~~~~~~~~~~~~~~~~~~~~~~~~~~~~~~~~~~~~~~~~~~~~~~~~~~~~~*/
int SDIRK_ErrorMsg(int code, KPP_REAL T, KPP_REAL H, int Ierr)
/*~~~~~~~~~~~~~~~~~~~~~~~~~~~~~~~~~~~~~~~~~~~~~~~~~~~~~~~~~~~~~~~~
 *    Handles all error messages
 *~~~~~~~~~~~~~~~~~~~~~~~~~~~~~~~~~~~~~~~~~~~~~~~~~~~~~~~~~~~~~~~ */
{

Ierr = code;

printf("\n~~~~~~~~~~~~~~~~~~~~~~~~~~~~~~~~~~~~~~~~~~~~~~~~~~~~~~");
printf("\nForced exit from Sdirk due to the following error:\n");

switch (code) {

case -1:
	printf("--> Improper value for maximal no of steps");
	break;
case -2:
	printf("--> Selected Rosenbrock method not implemented");
	break;
case -3:
	printf("--> Hmin/Hmax/Hstart must be positive");
	break;
case -4:
	printf("--> FacMin/FacMax/FacRej must be positive");
	break;
case -5:
	printf("--> Improper tolerance values");
	break;
case -6:
	printf("--> No of steps exceeds maximum bound");
	break;
case -7:
	printf("--> Step size too small (T + H/10 = T) or H < Roundoff");
	break;
case -8:
	printf("--> Matrix is repeatedly singular");
	break;
default: /* causing an error */
	printf("Unknown Error code: %d", code);

} /*  end switch   */

printf("\n   Time = %f and H = %f", T, H );
printf("\n~~~~~~~~~~~~~~~~~~~~~~~~~~~~~~~~~~~~~~~~~~~~~~~~~~~~~~\n");

return code;

} /*  end SDIRK_ErrorMsg   */

/*~~~~~~~~~~~~~~~~~~~~~~~~~~~~~~~~~~~~~~~~~~~~~~~~~~~~~~~~~~~~~~~~*/
void SDIRK_PrepareMatrix(KPP_REAL H, KPP_REAL T, KPP_REAL Y[], KPP_REAL FJAC[],
			int SkipJac, int SkipLU, KPP_REAL E[], int IP[], 
			int Reject, int ISING, int ISTATUS[] )
/*~~~~~~~~~~~~~~~~~~~~~~~~~~~~~~~~~~~~~~~~~~~~~~~~~~~~~~~~~~~~~~~~
 *  Compute the matrix E = 1/(H*GAMMA)*Jac, and its decomposition
 *~~~~~~~~~~~~~~~~~~~~~~~~~~~~~~~~~~~~~~~~~~~~~~~~~~~~~~~~~~~~~~~~*/
{

KPP_REAL HGammaInv;
int i, j;
int ConsecutiveSng = 0;
ISING = 1;


while( ISING != 0) {
	HGammaInv = ONE/(H*rkGamma);

/*~~~>  Compute the Jacobian */
	if(SkipJac==0) {
		JAC_CHEM(T,Y,FJAC);
		ISTATUS[Njac]++;
	} /* end if */

	#ifdef FULL_ALGEBRA
		for(j=0; j<NVAR; j++) {
			for(i=0; i<NVAR; i++) {
				E[j][i] = -FJAC[j][i];
			} /* end for */

			E[j][j] = E[j][j] + HGammaInv;
		} /* end for */

		DGETRF(NVAR, NVAR, E, NVAR, IP, ISING);
	#else
		for(i=0; i<LU_NONZERO; i++) {
			E[i] = -FJAC[i];
		} /* end for */

		for(i=0; i<NVAR; i++) {
			j = LU_DIAG[i];
			E[j]=E[j] + HGammaInv;
		} /* end for */

		ISING = KppDecomp(E);
		IP[0] = 1;
	#endif

	ISTATUS[Ndec]++;

	if(ISING != 0) {
		ISTATUS[Nsng]++;
		ConsecutiveSng++;

		if(ConsecutiveSng >= 6) {
			return; /* Failure */
		} /* end internal if */

		H = (KPP_REAL)(0.5) * H;
		SkipJac = 1; /* true */
		SkipLU = 0; /* false */
		Reject = 1; /* true */
	} /* end if */
} /* end while */

} /* end SDIRK_PrepareMatrix */

/*~~~~~~~~~~~~~~~~~~~~~~~~~~~~~~~~~~~~~~~~~~~~~~~~~~~~~~~~~~~~~~~~*/
void SDIRK_Solve( KPP_REAL H, int N, KPP_REAL E[], int IP[], int ISING, 
		KPP_REAL RHS[], int ISTATUS[] )
/*~~~~~~~~~~~~~~~~~~~~~~~~~~~~~~~~~~~~~~~~~~~~~~~~~~~~~~~~~~~~~~~
 *  Solves the system (H*Gamma-Jac)*x = RHS
 *      using the LU decomposition of E = I - 1/(H*Gamma)*Jac
 *~~~~~~~~~~~~~~~~~~~~~~~~~~~~~~~~~~~~~~~~~~~~~~~~~~~~~~~~~~~~~~~~*/
{

KPP_REAL HGammaInv = ONE/(H * rkGamma);

WSCAL(N, HGammaInv, RHS, 1);

#ifdef FULL_ALGEBRA
	DGETRS('N', N, 1, E, N, IP, RHS, N, ISING);
#else
	KppSolve(E, RHS);
#endif
	ISTATUS[Nsol]++;

} /* end SDIRK_Solve */

/*~~~~~~~~~~~~~~~~~~~~~~~~~~~~~~~~~~~~~~~~~~~~~~~~~~~~~~~~~~~~~~~~*/
void Sdirk4a()
/*~~~~~~~~~~~~~~~~~~~~~~~~~~~~~~~~~~~~~~~~~~~~~~~~~~~~~~~~~~~~~~~~*/
{

sdMethod = S4A;

/* Number of stages */
rkS = 5;

/* Method Coefficients */
rkGamma = (KPP_REAL)0.2666666666666666666666666666666667;

rkA[0][0] = (KPP_REAL)0.2666666666666666666666666666666667;
rkA[0][1] = (KPP_REAL)0.5000000000000000000000000000000000;
rkA[1][1] = (KPP_REAL)0.2666666666666666666666666666666667;
rkA[0][2] = (KPP_REAL)0.3541539528432732316227461858529820;
rkA[1][2] = (KPP_REAL)(-0.5415395284327323162274618585298197e-01);
rkA[2][2] = (KPP_REAL)0.2666666666666666666666666666666667;
rkA[0][3] = (KPP_REAL)0.8515494131138652076337791881433756e-01;
rkA[1][3] = (KPP_REAL)(-0.6484332287891555171683963466229754e-01);
rkA[2][3] = (KPP_REAL)0.7915325296404206392428857585141242e-01;
rkA[3][3] = (KPP_REAL)0.2666666666666666666666666666666667;
rkA[0][4] = (KPP_REAL)2.100115700566932777970612055999074;
rkA[1][4] = (KPP_REAL)(-0.7677800284445976813343102185062276);
rkA[2][4] = (KPP_REAL)2.399816361080026398094746205273880;
rkA[3][4] = (KPP_REAL)(-2.998818699869028161397714709433394);
rkA[4][4] = (KPP_REAL)0.2666666666666666666666666666666667;
rkB[0] = (KPP_REAL)2.100115700566932777970612055999074;
rkB[1] = (KPP_REAL)(-0.7677800284445976813343102185062276);
rkB[2] = (KPP_REAL)2.399816361080026398094746205273880;
rkB[3] = (KPP_REAL)(-2.998818699869028161397714709433394);
rkB[4] = (KPP_REAL)0.2666666666666666666666666666666667;

rkBhat[0] = (KPP_REAL)2.885264204387193942183851612883390;
rkBhat[1] = (KPP_REAL)(-0.1458793482962771337341223443218041);
rkBhat[2] = (KPP_REAL)2.390008682465139866479830743628554;
rkBhat[3] = (KPP_REAL)(-4.129393538556056674929560012190140);
rkBhat[4] = ZERO;

rkC[0] = (KPP_REAL)0.2666666666666666666666666666666667;
rkC[1] = (KPP_REAL)0.7666666666666666666666666666666667;
rkC[2] = (KPP_REAL)0.5666666666666666666666666666666667;
rkC[3] = (KPP_REAL)0.3661315380631796996374935266701191;
rkC[4] = ONE;

/* Ynew = Yold + h*Sum_i {rkB_i*k_i} = Yold + Sum_i {rkD_i*Z_i} */
rkD[0] = ZERO;
rkD[1] = ZERO;
rkD[2] = ZERO;
rkD[3] = ZERO;
rkD[4] = ONE;

/* Err = h * Sum_i {(rkB_i-rkBhat_i)*k_i} = Sum_i {rkE_i*Z_i} */
rkE[0] = (KPP_REAL)(-0.6804000050475287124787034884002302);
rkE[1] = (KPP_REAL)(1.558961944525217193393931795738823);
rkE[2] = (KPP_REAL)(-13.55893003128907927748632408763868);
rkE[3] = (KPP_REAL)(15.48522576958521253098585004571302);
rkE[4] = ONE;

/* Local order of Err estimate */
rkELO = 4;

/* h*Sum_j {rkA_ij*k_j} = Sum_j {rkTheta_ij*Z_j} */
rkTheta[0][1] = (KPP_REAL)1.875000000000000000000000000000000;
rkTheta[0][2] = (KPP_REAL)1.708847304091539528432732316227462;
rkTheta[1][2] = (KPP_REAL)(-0.2030773231622746185852981969486824);
rkTheta[0][3] = (KPP_REAL)0.2680325578937783958847157206823118;
rkTheta[1][3] = (KPP_REAL)(-0.1828840955527181631794050728644549);
rkTheta[2][3] = (KPP_REAL)0.2968246986151577397160821594427966;
rkTheta[0][4] = (KPP_REAL)0.9096171815241460655379433581446771;
rkTheta[1][4] = (KPP_REAL)(-3.108254967778352416114774430509465);
rkTheta[2][4] = (KPP_REAL)12.33727431701306195581826123274001;
rkTheta[3][4] = (KPP_REAL)(-11.24557012450885560524143016037523);

/* Starting value for Newton iterations: Z_i^0 = Sum_j {rkAlpha_ij*Z_j} */
rkAlpha[0][1] = (KPP_REAL)2.875000000000000000000000000000000;
rkAlpha[0][2] = (KPP_REAL)0.8500000000000000000000000000000000;
rkAlpha[1][2] = (KPP_REAL)0.4434782608695652173913043478260870;
rkAlpha[0][3] = (KPP_REAL)0.7352046091658870564637910527807370;
rkAlpha[1][3] = (KPP_REAL)(-0.9525565003057343527941920657462074e-01);
rkAlpha[2][3] = (KPP_REAL)0.4290111305453813852259481840631738;
rkAlpha[0][4] = (KPP_REAL)(-16.10898993405067684831655675112808);
rkAlpha[1][4] = (KPP_REAL)6.559571569643355712998131800797873;
rkAlpha[2][4] = (KPP_REAL)(-15.90772144271326504260996815012482);
rkAlpha[3][4] = (KPP_REAL)25.34908987169226073668861694892683;

rkELO = (KPP_REAL)4.0;

} /* end Sdirk4a */

/*~~~~~~~~~~~~~~~~~~~~~~~~~~~~~~~~~~~~~~~~~~~~~~~~~~~~~~~~~~~~~~~~*/
void Sdirk4b()
/*~~~~~~~~~~~~~~~~~~~~~~~~~~~~~~~~~~~~~~~~~~~~~~~~~~~~~~~~~~~~~~~~*/
{

sdMethod = S4B;

/* Number of stages */
rkS = 5;

/* Method coefficients */
rkGamma = (KPP_REAL)0.25;

rkA[0][0] = (KPP_REAL)0.25;
rkA[0][1] = (KPP_REAL)0.5;
rkA[1][1] = (KPP_REAL)0.25;
rkA[0][2] = (KPP_REAL)0.34;
rkA[1][2] = (KPP_REAL)(-0.40e-01);
rkA[2][2] = (KPP_REAL)0.25;
rkA[0][3] = (KPP_REAL)0.2727941176470588235294117647058824;
rkA[1][3] = (KPP_REAL)(-0.5036764705882352941176470588235294e-01);
rkA[2][3] = (KPP_REAL)0.2757352941176470588235294117647059e-01;
rkA[3][3] = (KPP_REAL)0.25;
rkA[0][4] = (KPP_REAL)1.041666666666666666666666666666667;
rkA[1][4] = (KPP_REAL)(-1.020833333333333333333333333333333);
rkA[2][4] = (KPP_REAL)7.812500000000000000000000000000000;
rkA[3][4] = (KPP_REAL)(-7.083333333333333333333333333333333);
rkA[4][4] = (KPP_REAL)0.25;

rkB[0] = (KPP_REAL)1.041666666666666666666666666666667;
rkB[1] = (KPP_REAL)(-1.020833333333333333333333333333333);
rkB[2] = (KPP_REAL)7.812500000000000000000000000000000;
rkB[3] = (KPP_REAL)(-7.083333333333333333333333333333333);
rkB[4] = (KPP_REAL)0.250000000000000000000000000000000;

rkBhat[0] = (KPP_REAL)1.069791666666666666666666666666667;
rkBhat[1] = (KPP_REAL)(-0.894270833333333333333333333333333);
rkBhat[2] = (KPP_REAL)7.695312500000000000000000000000000;
rkBhat[3] = (KPP_REAL)(-7.083333333333333333333333333333333);
rkBhat[4] = (KPP_REAL)0.212500000000000000000000000000000;

rkC[0] = (KPP_REAL)0.25;
rkC[1] = (KPP_REAL)0.75;
rkC[2] = (KPP_REAL)0.55;
rkC[3] = (KPP_REAL)0.5;
rkC[4] = ONE;

/* Ynew = Yold + h*Sum_i {rkB_i*k_i} = Yold + Sum_i {rkD_i*Z_i} */
rkD[0] = ZERO;
rkD[1] = ZERO;
rkD[2] = ZERO;
rkD[3] = ZERO;
rkD[4] = ONE;

/* Err = h * Sum_i {(rkB_i-rkBhat_i)*k_i} = Sum_i {rkE_i*Z_i} */
rkE[0] = (KPP_REAL)0.5750;
rkE[1] = (KPP_REAL)0.2125;
rkE[2] = (KPP_REAL)(-4.6875);
rkE[3] = (KPP_REAL)4.2500;
rkE[4] = (KPP_REAL)0.1500;

/* Local order of Err estimate */
rkELO = 4;

/* h*Sum_j {rkA_ij*k_j} = Sum_j {rkTheta_ij*Z_j} */
rkTheta[0][1] = (KPP_REAL)2.0;
rkTheta[0][2] = (KPP_REAL)1.680000000000000000000000000000000;
rkTheta[1][2] = (KPP_REAL)(-0.1600000000000000000000000000000000);
rkTheta[0][3] = (KPP_REAL)1.308823529411764705882352941176471;
rkTheta[1][3] = (KPP_REAL)(-0.1838235294117647058823529411764706);
rkTheta[2][3] = (KPP_REAL)0.1102941176470588235294117647058824;
rkTheta[0][4] = (KPP_REAL)(-3.083333333333333333333333333333333);
rkTheta[1][4] = (KPP_REAL)(-4.291666666666666666666666666666667);
rkTheta[2][4] = (KPP_REAL)34.37500000000000000000000000000000;
rkTheta[3][4] = (KPP_REAL)(-28.3333333333333333333333333333);

/* Starting value for Newton iterations: Z_i^0 = Sum_j {rkAlpha_ij*Z_j} */
rkAlpha[0][1] = (KPP_REAL)3.0;
rkAlpha[0][2] = (KPP_REAL)0.8800000000000000000000000000000000;
rkAlpha[1][2] = (KPP_REAL)0.4400000000000000000000000000000000;
rkAlpha[0][3] = (KPP_REAL)0.1666666666666666666666666666666667;
rkAlpha[1][3] = (KPP_REAL)(-0.8333333333333333333333333333333333e-01);
rkAlpha[2][3] = (KPP_REAL)0.9469696969696969696969696969696970;
rkAlpha[0][4] = (KPP_REAL)(-6.0);
rkAlpha[1][4] = (KPP_REAL)9.0;
rkAlpha[2][4] = (KPP_REAL)(-56.81818181818181818181818181818182);
rkAlpha[3][4] = (KPP_REAL)54.0;

} /* end Sdirk4b */

/*~~~~~~~~~~~~~~~~~~~~~~~~~~~~~~~~~~~~~~~~~~~*/
void Sdirk2a()
/*~~~~~~~~~~~~~~~~~~~~~~~~~~~~~~~~~~~~~~~~~~~*/
{

sdMethod = S2A;

/* ~~~> Number of stages    */
rkS = 2;

/* ~~~> Method coefficients    */
rkGamma = (KPP_REAL)0.2928932188134524755991556378951510;
rkA[0][0] = (KPP_REAL)0.2928932188134524755991556378951510;
rkA[0][1] = (KPP_REAL)0.7071067811865475244008443621048490;
rkA[1][1] = (KPP_REAL)0.2928932188134524755991556378951510;
rkB[0] = (KPP_REAL)0.7071067811865475244008443621048490;
rkB[1] = (KPP_REAL)0.2928932188134524755991556378951510;
rkBhat[0] = (KPP_REAL)0.6666666666666666666666666666666667;
rkBhat[1] = (KPP_REAL)0.3333333333333333333333333333333333;
rkC[0] = (KPP_REAL)0.292893218813452475599155637895151;
rkC[1] = ONE;

/* ~~~> Ynew = Yold + h*Sum_i {rkB_i*k_i} = Yold + Sum_i {rkD_i*Z_i}    */
rkD[0] = ZERO;
rkD[1] = ONE;

/* ~~~> Err = h * Sum_i {(rkB_i-rkBhat_i)*k_i} = Sum_i {rkE_i*Z_i}    */
rkE[0] = (KPP_REAL)0.4714045207910316829338962414032326;
rkE[1] = (KPP_REAL)(-0.1380711874576983496005629080698993);

/* ~~~> Local order of Err estimate    */
rkELO = 2;

/* ~~~> h*Sum_j {rkA_ij*k_j} = Sum_j {rkTheta_ij*Z_j}    */
rkTheta[0][1] = (KPP_REAL)2.414213562373095048801688724209698;

/* ~~~> Starting value for Newton iterations */
rkAlpha[0][1] = (KPP_REAL)3.414213562373095048801688724209698;

} /* end Sdirk2a */

/*~~~~~~~~~~~~~~~~~~~~~~~~~~~~~~~~~~~~~~~~~~~~~~~~~~~~~~~~~~~~~~~~*/
void Sdirk2b()
/*~~~~~~~~~~~~~~~~~~~~~~~~~~~~~~~~~~~~~~~~~~~~~~~~~~~~~~~~~~~~~~~~*/
{

sdMethod = S2B;

/* ~~~> Number of stages    */
rkS      = 2;

/* ~~~> Method coefficients    */
rkGamma = (KPP_REAL)1.707106781186547524400844362104849;
rkA[0][0] = (KPP_REAL)1.707106781186547524400844362104849;
rkA[0][1] = (KPP_REAL)(-0.707106781186547524400844362104849);
rkA[1][1] = (KPP_REAL)1.707106781186547524400844362104849;
rkB[0] = (KPP_REAL)(-0.707106781186547524400844362104849);
rkB[1] = (KPP_REAL)1.707106781186547524400844362104849;
rkBhat[0] = (KPP_REAL)0.6666666666666666666666666666666667;
rkBhat[1] = (KPP_REAL)0.3333333333333333333333333333333333;
rkC[0] = (KPP_REAL)1.707106781186547524400844362104849;
rkC[1] = ONE;

/* ~~~> Ynew = Yold + h*Sum_i {rkB_i*k_i} = Yold + Sum_i {rkD_i*Z_i}    */
rkD[0] = ZERO;
rkD[1] = ONE;

/* ~~~> Err = h * Sum_i {(rkB_i-rkBhat_i)*k_i} = Sum_i {rkE_i*Z_i}    */
rkE[0] = (KPP_REAL)(-0.4714045207910316829338962414032326);
rkE[1] = (KPP_REAL)0.8047378541243650162672295747365659;

/* ~~~> Local order of Err estimate    */
rkELO = 2;

/* ~~~> h*Sum_j {rkA_ij*k_j} = Sum_j {rkTheta_ij*Z_j}    */
rkTheta[0][1] = (KPP_REAL)(-0.414213562373095048801688724209698);

/* ~~~> Starting value for Newton iterations */
rkAlpha[0][1] = (KPP_REAL)0.5857864376269049511983112757903019;

} /* end Sdirk2b */

/*~~~~~~~~~~~~~~~~~~~~~~~~~~~~~~~~~~~~~~~~~~~~~~~~~~~~~~~~~~~~~~~~*/
void Sdirk3a()
/*~~~~~~~~~~~~~~~~~~~~~~~~~~~~~~~~~~~~~~~~~~~~~~~~~~~~~~~~~~~~~~~~*/
{

sdMethod = S3A;

/* ~~~> Number of stages    */
rkS = 3;

/* ~~~> Method coefficients    */
rkGamma = (KPP_REAL)0.2113248654051871177454256097490213;
rkA[0][0] = (KPP_REAL)0.2113248654051871177454256097490213;
rkA[0][1] = (KPP_REAL)0.2113248654051871177454256097490213;
rkA[1][1] = (KPP_REAL)0.2113248654051871177454256097490213;
rkA[0][2] = (KPP_REAL)0.2113248654051871177454256097490213;
rkA[1][2] = (KPP_REAL)0.5773502691896257645091487805019573;
rkA[2][2] = (KPP_REAL)0.2113248654051871177454256097490213;
rkB[0] = (KPP_REAL)0.2113248654051871177454256097490213;
rkB[1] = (KPP_REAL)0.5773502691896257645091487805019573;
rkB[2] = (KPP_REAL)0.2113248654051871177454256097490213;
rkBhat[0]= (KPP_REAL)0.2113248654051871177454256097490213;
rkBhat[1]= (KPP_REAL)0.6477918909913548037576239837516312;
rkBhat[2]= (KPP_REAL)0.1408832436034580784969504064993475;
rkC[0] = (KPP_REAL)0.2113248654051871177454256097490213;
rkC[1] = (KPP_REAL)0.4226497308103742354908512194980427;
rkC[2] = ONE;

/* ~~~> Ynew = Yold + h*Sum_i {rkB_i*k_i} = Yold + Sum_i {rkD_i*Z_i}    */
rkD[0] = ZERO;
rkD[1] = ZERO;
rkD[2] = ONE;

/* ~~~> Err = h * Sum_i {(rkB_i-rkBhat_i)*k_i} = Sum_i {rkE_i*Z_i}    */
rkE[0] = (KPP_REAL)0.9106836025229590978424821138352906;
rkE[1] = (KPP_REAL)(-1.244016935856292431175815447168624);
rkE[2] = (KPP_REAL)0.3333333333333333333333333333333333;

/* ~~~> Local order of Err estimate    */
rkELO    = 2;

/* ~~~> h*Sum_j {rkA_ij*k_j} = Sum_j {rkTheta_ij*Z_j}    */
rkTheta[0][1] =  ONE;
rkTheta[0][2] = (KPP_REAL)(-1.732050807568877293527446341505872);
rkTheta[1][2] = (KPP_REAL)2.732050807568877293527446341505872;

/* ~~~> Starting value for Newton iterations */
rkAlpha[0][1] = (KPP_REAL)2.0;
rkAlpha[0][2] = (KPP_REAL)(-12.92820323027550917410978536602349);
rkAlpha[1][2] = (KPP_REAL)8.83012701892219323381861585376468;

} /* end Sdirk3a */

/*~~~~~~~~~~~~~~~~~~~~~~~~~~~~~~~~~~~~~~~~~~~~~~~~~~~~~~~~~~~~~~~~*/
void FUN_CHEM(KPP_REAL T, KPP_REAL Y[], KPP_REAL P[])
/*~~~~~~~~~~~~~~~~~~~~~~~~~~~~~~~~~~~~~~~~~~~~~~~~~~~~~~~~~~~~~~~~*/
{

KPP_REAL Told;

Told = TIME;
TIME = T;
Update_SUN();
Update_RCONST();
Fun( Y, FIX, RCONST, P );
TIME = Told;


}  /*  end FUN_CHEM  */

/*~~~~~~~~~~~~~~~~~~~~~~~~~~~~~~~~~~~~~~~~~~~~~~~~~~~~~~~~~~~~~~~~*/
void JAC_CHEM(KPP_REAL T, KPP_REAL Y[], KPP_REAL JV[])
/*~~~~~~~~~~~~~~~~~~~~~~~~~~~~~~~~~~~~~~~~~~~~~~~~~~~~~~~~~~~~~~~~*/
{

KPP_REAL Told;

#ifdef FULL_ALGEBRA
	KPP_REAL JS[LU_NONZERO];
	int i,j;
#endif

Told = TIME;
TIME = T;
Update_SUN();
Update_RCONST();

#ifdef FULL_ALGEBRA
	Jac_SP( Y, FIX, RCONST, JS);

	for(j=0; j<NVAR; j++) {
		for(i=0; i<NVAR; i++) {
			JV[j][i] = (KPP_REAL)0.0;
		} /* end for */
	} /* end for */

	for(i=0; i<LU_NONZERO; i++) {
		JV[LU_ICOL[i]][LU_IROW[i]] = JS[i];
	} /* end for */
#else
	Jac_SP(Y, FIX, RCONST, JV);
#endif

TIME = Told;

} /* end JAC_CHEM  */
