# Supplementary material for: The atmospheric chemistry box model CAABA/MECCA-3.0
Source: Copernicus journal article supplement (doi:10.5194/gmd-4-373-2011), 2011-05-06
Supplement: Supplementary file 9 [file gmd-4-373-2011-supplement.zip › caaba_3.0/mecca/kpp/int/user_contributed/readme]

Integrators in this directory have been contributed by KPP users. By
default, KPP will not search for integrators in this directory. To
activate them, move them into the int/ directory.
