# Supplementary material for: The atmospheric chemistry box model CAABA/MECCA-3.0
Source: Copernicus journal article supplement (doi:10.5194/gmd-4-373-2011), 2011-05-06
Supplement: Supplementary file 9 [file gmd-4-373-2011-supplement.zip › caaba_3.0/mecca/kpp/Makefile.defs.Darwin]

# -*- sh -*-
##############################################################################
#
#  KPP - The Kinetic PreProcessor
#        Builds simulation code for chemical kinetic systems
#
#  Copyright (C) 1995-1997 Valeriu Damian and Adrian Sandu
#  Copyright (C) 1997-2005 Adrian Sandu
#
#  KPP is free software; you can redistribute it and/or modify it under the
#  terms of the GNU General Public License as published by the Free Software
#  Foundation (http://www.gnu.org/copyleft/gpl.html); either version 2 of the
#  License, or (at your option) any later version.
#
#  KPP is distributed in the hope that it will be useful, but WITHOUT ANY
#  WARRANTY; without even the implied warranty of MERCHANTABILITY or FITNESS
#  FOR A PARTICULAR PURPOSE.  See the GNU General Public License for more
#  details.
#
#  You should have received a copy of the GNU General Public License along
##  with this program; if not, consult http://www.gnu.org/copyleft/gpl.html or
#  write to the Free Software Foundation, Inc., 59 Temple Place - Suite 330,
#  Boston, MA  02111-1307,  USA.
#
#  Adrian Sandu
#  Computer Science Department
#  Virginia Polytechnic Institute and State University
#  Blacksburg, VA 24060
#  E-mail: sandu@cs.vt.edu
#
##############################################################################

# In order to compile KPP you have to provide the following information:

# 1. The name of the compiler you want to use. Normaly this 
#    is either GNU C compiler (gcc) or the native compiler (cc)
#    You can use the complete pathname if the compiler is not in $PATH 
#    Note that for SUN machines is better to use gcc.
#    For GNU C compiler use:
#      CC=gcc
#    For the native compiler use:
#      CC=cc

CC=gcc 

# 2. The name of your lexical analizer. KPP requires FLEX to be used.
#    FLEX is a public domain lexical analizer and you can download it from
#    http://www.gnu.org/software/flex/ or any other mirror site. If flex
#    directory is not included in your path use the complete pathname.

FLEX=flex

# 3. The complete pathname of the FLEX library (libfl.a).
#    On many systems this is: /usr/local/util/lib/flex

FLEX_LIB_DIR=/Developer/SDKs/MacOSX10.5.sdk/usr/lib

# 4. Platform independent C compiler flags. By default "-O" is used which 
#    turns on optimisation. If you are experiencing problems you may try 
#    "-g" to include debuging informations.
#    "-Wall" = all warnings

CC_FLAGS=-O
# CC_FLAGS=-O -Wall

##############################################################################
