# Supplementary material for: The atmospheric chemistry box model CAABA/MECCA-3.0
Source: Copernicus journal article supplement (doi:10.5194/gmd-4-373-2011), 2011-05-06
Supplement: Supplementary file 9 [file gmd-4-373-2011-supplement.zip › caaba_3.0/messy_main_blather.f90]

! ************************************************************************
MODULE messy_main_blather
! ************************************************************************

  IMPLICIT NONE
  PRIVATE

  PUBLIC :: start_message       ! standard messages for start and end ...
  PUBLIC :: end_message         ! .. of submodel-specific MESSy-routines
  PUBLIC :: info
  PUBLIC :: warning  

CONTAINS

  ! --------------------------------------------------------------------
  SUBROUTINE start_message(modstr, str, substr, l_print)
    
    USE messy_main_constants_mem, ONLY: HLINE1
    IMPLICIT NONE
    INTRINSIC :: TRIM

    ! I/O
    CHARACTER(LEN=*), INTENT(IN)  :: modstr, str, substr
    LOGICAL, INTENT(IN), OPTIONAL :: l_print

    ! LOCAL
    LOGICAL :: zl_print

    IF (PRESENT(l_print)) THEN
       zl_print = l_print
    ELSE
       zl_print = .TRUE.  ! DEFAULT
    END IF

    IF (.NOT. zl_print) RETURN

    WRITE(*,*) HLINE1
    WRITE(*,*) '*** START ',TRIM(modstr),': ',TRIM(str), &
         ' (',TRIM(substr),')'
    
  END SUBROUTINE start_message
  ! --------------------------------------------------------------------

  ! --------------------------------------------------------------------
  SUBROUTINE end_message(modstr, str, substr, l_print)
    
    USE messy_main_constants_mem, ONLY: HLINE1
    IMPLICIT NONE
    INTRINSIC :: TRIM

    ! I/O
    CHARACTER(LEN=*), INTENT(IN)  :: modstr, str, substr
    LOGICAL, INTENT(IN), OPTIONAL :: l_print

    ! LOCAL
    LOGICAL :: zl_print

    IF (PRESENT(l_print)) THEN
       zl_print = l_print
    ELSE
       zl_print = .TRUE.  ! DEFAULT
    END IF

    IF (.NOT. zl_print) RETURN

    WRITE(*,*) '*** END   ',TRIM(modstr),': ',TRIM(str), &
         ' (',TRIM(substr),')'
    WRITE(*,*) HLINE1

  END SUBROUTINE end_message
  ! --------------------------------------------------------------------

  ! ---------------------------------------------------------------------
  SUBROUTINE info(string, substr, l_print)

    IMPLICIT NONE
    INTRINSIC :: PRESENT, TRIM
    CHARACTER(LEN=*),           INTENT(IN) :: string
    CHARACTER(LEN=*), OPTIONAL, INTENT(IN) :: substr
    LOGICAL,          OPTIONAL, INTENT(IN) :: l_print

    ! LOCAL
    LOGICAL :: zl_print

    IF (PRESENT(l_print)) THEN
       zl_print = l_print
    ELSE
       zl_print = .TRUE.  ! DEFAULT
    END IF

    IF (.NOT. zl_print) RETURN

    IF (PRESENT(substr)) THEN
       WRITE (*,'(A," (",A,")")') TRIM(string), TRIM(substr)
    ELSE
       WRITE (*,'(A)') TRIM(string)
    ENDIF

  END SUBROUTINE info
  !-------------------------------------------------------------------------

  !-------------------------------------------------------------------------
  SUBROUTINE warning(string, substr, l_print)

    IMPLICIT NONE
    INTRINSIC :: TRIM
    CHARACTER(LEN=*),           INTENT(IN) :: string, substr
    LOGICAL,          OPTIONAL, INTENT(IN) :: l_print

    ! LOCAL
    LOGICAL :: zl_print

    IF (PRESENT(l_print)) THEN
       zl_print = l_print
    ELSE
       zl_print = .TRUE.  ! DEFAULT
    END IF

    IF (.NOT. zl_print) RETURN

    WRITE (*,'("WARNING: ",A," (",A,")")') TRIM(string), TRIM(substr)

  END SUBROUTINE warning
  !-------------------------------------------------------------------------

! ************************************************************************
END MODULE messy_main_blather
! ************************************************************************
