# Supplementary material for: The atmospheric chemistry box model CAABA/MECCA-3.0
Source: Copernicus journal article supplement (doi:10.5194/gmd-4-373-2011), 2011-05-06
Supplement: Supplementary file 9 [file gmd-4-373-2011-supplement.zip › caaba_3.0/messy_mecca_dbl_parameters.inc]

! ==============================================================================
! {%CMODEL}_dbl_parameters.inc
! generated: {%TIMEDATE}
!
! this module is generated by imdouble utility
!
! this is a dummy for inter-configuration parameters file
!
! [Gromov, MPIC, 2007-2009]
! ==============================================================================

! created for compatibility; do not delete, please
