# Supplementary material for: The atmospheric chemistry box model CAABA/MECCA-3.0
Source: Copernicus journal article supplement (doi:10.5194/gmd-4-373-2011), 2011-05-06
Supplement: Supplementary file 9 [file gmd-4-373-2011-supplement.zip › caaba_3.0/montecarlo/mcexp_seed.txt]

 1340260714
 45324199
 645630905
 842776898
 999303340
 2006625704
 906008778
 339496546
 1587135281
 1978128852
 992912425
 1125623953
 454924610
 60857033
 6427017
 94486792
 979263672
 198088819
 2100574716
 61360344
 108380115
 2084884543
 634744356
 1876295282
 2000378619
 11746432
 249200799
 2033450236
 590376092
 1407944685
 1975117456
 1720468663
 468849643
 1999066270
 832677247
 1915868592
 540921105
 589492940
 714360669
 1108308498
 66460464
 957376494
 1449009766
 1105032602
 1250100404
 465005162
 1281534633
 821582195
 2110996504
 1243663330
 1286820781
 1585702332
 1815956200
 313721147
 645015519
 1082153784
 999834518
 2101318518
 1553118200
 1675129517
 472644174
 1215852012
 917515988
 1246919713
 147413566
 54194772
 1255847942
 1748240856
 1080848436
 1013900736
 716035624
 9697193
 2062187597
 511859456
 498626009
 1725653646
 520944926
 1195473693
 1316519863
 1727150945
 773017265
 1843773433
 1682040337
 1509493174
 1737569328
 1966483285
 834999888
 1075795316
 1194857635
 141677884
 1134002110
 647544343
 868777942
 1396391982
 2083216316
 772958874
 280215182
 598442976
 728168263
 2128171507
 1052613630
 581579686
 1065981180
 1163696888
 1777977881
 909615875
 1084583870
 1718274670
 1723288929
 1330837005
 499435329
 14861470
 2091385545
 1626796788
 1282779529
 953658909
 732043961
 168538560
 1318671107
 1508811857
 436453878
 336902525
 566627961
 1031114790
 1035985965
 2044155465
 1051105187
 85802555
 886198313
 2092310919
 916170676
 498996146
 208345188
 2106082962
 2062520870
 1758949618
 1484727411
 901726882
 366688739
 1300330798
 1193687195
 301785187
 1008543769
 1336226496
 300394609
 81465271
 942731578
 173886986
 1318933132
 755838285
 2145837751
 1812102871
 694504146
 479296474
 740243777
 1116542017
 925931600
 579525020
 1708257985
 1869347032
 1831883228
 280948036
 438126505
 1085430819
 1394741159
 968397137
 2135867800
 573155032
 1515821832
 1108422769
 453727728
 1493569254
 721553742
 466216217
 423695576
 2127033105
 1757149935
 320638898
 506223480
 1572027387
 796532998
 701815538
 1282772960
 1905149479
 1408210811
 310282380
 1533202812
 1047899495
 488590526
 1072286761
 335051388
 252451408
 1418678762
 599600508
 44950641
 264340791
 1394307291
 1323452327
 998556421
 1850489679
 1420045996
 1669340420
 1101759609
 645634947
 301173923
 253918552
 695370785
 981794813
 1356616593
 1654456091
 1552576107
 1569005238
 1130681589
 2084755329
 22684710
 679362053
 825757954
 964366706
 1902443651
 391019749
 34752468
 499475190
 1834072723
 843347481
 1343316995
 1840175010
 1126004797
 1661101626
 380824537
 1982037619
 916874880
 187612003
 685426822
 324723627
 805040356
 477443260
 1483453855
 382198794
 1788230435
 2070942183
 1223489886
 1792993183
 245212056
 1031113631
 346755627
 1284929743
 687380041
 944020533
 660956879
 1929129361
 1149394373
 402879678
 1938387788
 2028133533
 1736842143
 877727938
 1741863590
 1017198471
 1704292462
 1839766770
 1374681413
 634538294
 310272205
 193055374
 1300832367
 1019949129
 2137343602
 1148253685
 297096509
 1070436368
 1386169710
 2064106260
 1189132363
 1620517220
 1084667697
 1982724349
 1927817218
 251561929
 2072994615
 642632144
 240051142
 508952432
 1182962067
 1103511796
 1433688917
 1742885967
 1938048177
 2032346042
 1593681411
 357060629
 1091425326
 820845712
 5344120
 245868269
 1207082293
 29231731
 1848942815
 1980818362
 619150422
 1290345126
 1943388622
 1124619398
 357910257
 933943296
 281298861
 887313122
 1968116699
 1177499243
 1757598121
 794671384
 24596569
 1457068495
 1891108171
 1699353448
 1288886937
 713576911
 1325505315
 2072334558
 331224567
 15551170
 6644252
 1661049840
 1543174262
 1187747968
 2035088197
 901190607
 398891871
 2130300988
 443593144
 393521708
 941752470
 2062803647
 502718116
 1757977541
 989378413
 605348884
 63453883
 1749408593
 212931404
 2036550735
 571037932
 1799248753
 998757799
 1276492738
 1147245213
 926850037
 216565343
 130200925
 859870693
 965479849
 355605966
 1161201751
 1441467998
 750480053
 332673335
 1247660369
 234612691
 1014186735
 2116704980
 442901895
 1664246599
 1549433174
 537755981
 1258451539
 940922762
 1877719321
 470406806
 849718950
 1002319307
 1890970138
 609246249
 917911670
 2096791352
 171547223
 1669937695
 1119654461
 1245066863
 861755738
 1180608883
 330409650
 1857800019
 1879414442
 393506512
 215958926
 1572062471
 441566244
 26747582
 713643458
 1100467558
 1956885160
 1537957979
 1527363225
 109834275
 578166926
 390414632
 1984722135
 1819522935
 1271169581
 899900296
 1764519796
 846049714
 1984380267
 1007195879
 1393363904
 1937787016
 1787938591
 935769997
 1069479627
 1588663251
 699706349
 544862991
 2134791687
 1273742008
 554086257
 1425808761
 322826383
 1467770907
 329401468
 474054502
 572654850
 1682984565
 1019370167
 214981885
 1939289260
 1670345267
 521663012
 50832890
 1781569607
 1941616173
 660524247
 698836366
 1373942141
 268797473
 405348046
 273658244
 778374273
 501747799
 1616574400
 597364150
 331178190
 1612613520
 815931586
 1292668025
 1367190471
 1536130262
 693854400
 179632114
 1426780535
 397259173
 1072579694
 1090573849
 800545112
 1402239809
 761549366
 1247264828
 938329477
 47252928
 2070031002
 1883145618
 1670507797
 269048756
 1601076814
 2059089030
 1016990431
 1129369156
 2048851471
 1648888405
 895786868
 134449328
 1245497043
 471385886
 1545111300
 702769855
 283923925
 406236604
 1145532642
 2018716851
 1713036509
 1889689668
 2095205139
 80364176
 633010762
 2130532912
 192584856
 1246805989
 1673566354
 1375364800
 1441048537
 1787980802
 601502542
 668614349
 620210034
 40246377
 1963088350
 1571846223
 1043041564
 1551870917
 1955324673
 2111695914
 1729203440
 1916837742
 1724568487
 619875343
 1134271704
 172159064
 1007275207
 1094372479
 796290646
 1382512707
 669544554
 416335149
 2048659396
 778935942
 254528395
 90440554
 684920148
 1573437407
 566663727
 1861804017
 1156506196
 1368464204
 625271508
 1265802975
 641313493
 1505002669
 1584630549
 1321471213
 1922495404
 773838234
 2086180120
 967886145
 1543295346
 939768472
 279278788
 1561427754
 1781845184
 541324322
 741356138
 1162135803
 1429145507
 1255155773
 457517765
 452364333
 1100293350
 137688475
 778446755
 871620590
 206410417
 1570663852
 764580213
 1263680573
 1441006288
 987815054
 824068542
 951197844
 54052653
 1255285111
 775993265
 481020686
 1993534579
 1617573337
 1959019712
 649220346
 771608404
 268028721
 809956862
 1105557134
 1479833470
 968346550
 727842744
 257521085
 724714163
 1255511916
 1959388752
 2139950765
 1512936296
 1412420311
 77319880
 1916275295
 1842265697
 1044039521
 1589782950
 953347832
 1959301270
 1776621721
 338970454
 1988328287
 571608190
 146083727
 852196277
 731868428
 206745449
 806494587
 699415355
 1057411601
 549584852
 337090628
 1114305831
 640120770
 246473746
 2028416889
 1901612106
 1598334087
 997038922
 1787012120
 264141614
 184578911
 2072070390
 1626624524
 485258006
 625861362
 541586008
 1760531968
 1199475757
 230433126
 2050805787
 1195003636
 1361895774
 81070068
 375003460
 216967770
 301517199
 424149135
 1937623399
 530404209
 1364138667
 691342297
 720761439
 1359462269
 123850756
 1295872630
 1219475537
 78842825
 2147264624
 1777352887
 1046128179
 1889996958
 644896496
 1961567714
 1424945923
 583026116
 668091513
 1945825420
 31962363
 902190237
 1550982172
 331586788
 161505796
 2105852800
 1274783446
 378626044
 1548984847
 724873307
 1915252194
 1437337149
 1957501194
 1292174293
 1849021844
 239186438
 2028440081
 1316074696
 829050234
 284097855
 1650664428
 749387665
 1137883606
 1016361712
 1079790492
 2099752648
 1709879164
 205374896
 1886871799
 1933421920
 491373492
 118714974
 576070405
 447605528
 2099836249
 353526846
 1648116982
 1734995923
 1291092874
 2025106909
 477458633
 1033773954
 1611001486
 157622385
 558542220
 1708017405
 1990694402
 774851468
 996590200
 1012922711
 1829076778
 1760083653
 273194422
 529515657
 475173214
 1712289344
 2068750409
 1033120198
 1408688642
 7111280
 1224842462
 1502779247
 346598579
 338288105
 836052264
 862664352
 2014215173
 700346068
 630014879
 704697483
 1574371227
 1164398087
 1158715209
 956394228
 1108081977
 1975994001
 678033491
 678085051
 617050690
 908292457
 1111417916
 1180690219
 856406359
 360846128
 83644823
 982131898
 226554650
 505484651
 319824559
 203305488
 2079652332
 322870273
 1714696886
 2052241040
 1917172240
 1630989096
 1446857057
 397289379
 355981011
 1132411553
 1510754746
 2144618649
 1319876221
 1901757847
 96588941
 724652864
 497133548
 1618228368
 2080316716
 1888831565
 2144251362
 595371316
 1804797409
 1688314953
 1071055031
 575156854
 1254936048
 1557361725
 1690154461
 953256410
 1401176703
 2107448964
 1147882315
 1088580225
 1058420068
 1773516968
 2047602265
 180562018
 1893170029
 1530713508
 1942820837
 332901677
 961562026
 1675074450
 1977261583
 143530457
 1809481933
 265319424
 374242021
 1611579509
 1463384401
 782822032
 596489614
 707544356
 431016883
 1083687992
 1124456518
 691176352
 405794107
 64142097
 328138231
 1721991029
 1761714159
 1612371074
 992678126
 1006853440
 589805632
 149576925
 911434067
 592946705
 1364426483
 1719390133
 1050801486
 822883572
 1625848322
 953636067
 758373548
 165381738
 341856856
 1647748933
 487333539
 1756755162
 1481616133
 1519111945
 1782572101
 164548414
 280664800
 32867181
 1734023835
 21075385
 495506897
 185467328
 64715447
 121947316
 1550861801
 1536761752
 572120729
 698437597
 2018417396
 382290411
 1373509323
 1292296303
 1419546385
 1692899824
 436652254
 2012129103
 394808980
 727463590
 962550144
 22107983
 1800705467
 1822087718
 1447547024
 496365492
 1386873166
 1452769610
 322777886
 1342952748
 1347263359
 1906388001
 2019304659
 1793174360
 1560881680
 1445977218
 16937665
 1719302226
 1208073012
 1035380682
 1224826984
 1393456513
 1135044224
 530942908
 1141476792
 1003136393
 495437177
 536262238
 37595763
 1483402553
 1754265068
 763997368
 1958614664
 220394095
 1356083749
 1269298934
 1768877163
 665777894
 1372605441
 18177808
 1985952101
 2140757088
 867491964
 830283432
 189040545
 460524118
 562619454
 1676090346
 1577972396
 1457233094
 232252759
 1533581444
 1303182295
 2029490762
 1589706794
 735452763
 1244893464
 1764308040
 1169762249
 1698189761
 330673732
 1045174763
 1282927304
 1265508767
 1259067539
 1223595917
 1771001887
 112568656
 900009951
 368687750
 231853710
 37594067
 189208491
 666849100
 114833978
 1442272784
 1087576379
 25372019
 1474281857
 714330453
 505747834
 349688588
 239304077
 1671176114
 1235075110
 1195087826
 506222091
 1142256030
 56035140
 1316626243
 958733491
 1972051741
 1621350841
 1507512798
 2129355407
 1480332814
 1123756558
 813161544
 989000787
 2073437340
 1184613966
 1910448994
 1028325143
 1975752388
 1398144568
 1647225093
 1735976782
 2013488411
 1048272879
 575065665
 333321646
 1261610768
 944828483
 659762269
 149354647
 1118424153
 778809415
 1887608850
 1091625650
 1208181274
 537827386
 744151125
 1620536964
 1865171151
 858499307
 373880090
 1893905134
 1070176739
 1993727400
 873526432
 161947298
 259516392
 1748191515
 1308084861
 751222594
 599674909
 1109974172
 1267575933
 1940306693
 1218991066
 2027996254
 1940834867
 1242357113
 1838719954
 1038572085
 439029000
 1296633110
 1642411792
 783702182
 887461006
 1536963709
 1683087049
 432113011
 664484066
 246816690
 1279594075
 820103433
 259867696
 858703751
 157619860
 1513142067
 796993671
 917331625
 1640543579
 456443758
 2083544877
 1889730382
 687408620
 1891575632
 1065123638
 641285740
 311746241
 639209504
 1788482078
 1872459957
 436470748
 797152633
 525300205
 1329539214
 2001112071
 907852628
 832041950
 322110990
 1032368962
 249428728
 335860701
 662529123
 2124834935
 1890463877
 1309142098
 1633644156
 925267186
 780340422
 1092978381
 1274174905
 1430498148
 1789163007
 1962819024
 483551129
 1120845728
 964457412
 1846609021
 1997697203
 1565094023
 431798933
 1706731012
 776647333
 907358903
 329774259
 225983803
 1010699229
 1006601313
 525482450
 187880285
 1069173498
 583406395
 1393515461
 1111006724
 238086930
 611540402
 256113299
 1893676064
 1708577440
 741592695
 706834484
 159916222
 920218563
 635650887
 640624751
 2005183126
 898754094
 454317821
 286121098
 814639671
 543500034
 123759224
 1430292367
 2116649729
 1075939286
 1055447286
 1685088576
 2088687856
 25026083
 100999901
 1385968976
 1430534994
 1524379233
 2067395331
 1017383627
 1086123710
 1730287163
 1626389284
 413285138
 188122584
 607325104
 1613991076
 798743920
 671684227
 1848056794
 1267216
 102541679
 1677762994
 1128711592
 522330560
 1224727316
 2019929475
 1646652226
 545341494
 1715571523
 1878326545
 342294904
 1111874178
 460581610
 535235201
 1581110782
 599727481
 1109338387
 530571505
 840042323
 1227532430
 1916718393
 1434815039
 1906895277
 2106091697
 63751188
 103535795
 910717462
 1776246967
 509201485
 1458913188
 677734766
 1571901224
 1309280125
 549580722
 761577636
 1331094396
 1492321585
 2037044085
 690162064
 796464717
 233322933
 1453281909
 1633883521
 837932031
 1612109918
 1576904247
 163387279
 1082208057
 693909340
 1168047629
 321614852
 1928816342
 88380820
 636594448
 1377842634
 1165231639
 1196672899
 967878931
 305479202
 875203051
 1354664192
 1039613004
 357026996
 603086361
 1340467749
 46258145
 223152558
 833854819
 2044163124
 280320939
 85751129
 134557283
 1150379897
 1950476802
 527470359
 1755143397
 1564867820
 768761952
 809947748
 1176087396
 1653639528
 1144126823
 1417930897
 42624689
 1092753959
 1293652017
 487506476
 259622694
 1533131381
 1638559829
 558522917
 1531604665
 1352799697
 6470738
 1497722329
 2115698901
 1014690805
 1423140338
 1189839785
 557952760
 1166657123
 2125762145
 5529717
 307637425
 648694224
 523518559
 1612633128
 982470387
 2056646856
 213364191
 1125476091
 1118082397
 389150269
 1620213783
 995903240
 1543398281
 793404818
 283865594
 954721680
 1533258354
 1001458501
 1449145895
 621362707
 1028734956
 1149441769
 1734881340
 1981661628
 445036959
 527595740
 1871723058
 1301761109
 737975101
 17821728
 205345548
 2099633909
 819953088
 1235363828
 1058138761
 2114739787
 493052851
 221424459
 795971389
 16196187
 1089609151
 1403971660
 1637625869
 327183584
 955104399
 1159480289
 858222907
 702094492
 623813749
 90424820
 343715549
 709695664
 983982723
 22663165
 40171512
 361394837
 717009190
 43614174
 1713817609
 1227403851
 1446833170
 83136880
 396624458
 1406190061
 1037826038
 269646966
 541038529
 608254334
 704426148
 741532385
 205978971
 769866814
 876945814
 1456792740
 885392769
 755347166
 1485650728
 892050329
 797009692
 2031288425
 91150531
 1512186002
 1313182805
 804419920
 718009106
 727175249
 1584630698
 1562025667
 1668311329
 1893558540
 1330979234
 193097606
 1404915597
 886187938
 1915714536
 716956153
 1048242144
 1528063480
 1047452841
 1762233697
 228750037
 1513998870
 1077566716
 743921390
 594453501
 1032710961
 1816407191
 1155794074
 484315027
 217496545
 717455561
 1310321143
 423106517
 1531887842
 37161237
 143528191
 828234137
 1741448603
 731310986
 407859490
 1360868123
 835301867
 1239004763
 1003148174
 237407739
 840011495
 1040643708
 2050430866
 255841253
 1249129100
 1321022279
 1891716827
 488591283
 1099492202
 1968265262
 2095554934
 936311922
 1637911006
 1513267787
 1684348926
 1295423736
 1075635416
 716519038
 1405006745
 1998192767
 906983098
 809486906
 1612491192
 1670039233
 384053881
 1774176949
 1505435753
 1679043090
 654011955
 1748276456
 1145914641
 1353565578
 1617014317
 641507062
 419443614
 874900789
 2144793322
 1229860345
 1716985013
 2003398259
 1296290790
 1095975506
 1894781568
 1811927957
 236565064
 197644321
 1601329809
 1625509877
 1929613919
 733786514
 1184694978
 884906555
 359907768
 708221918
 804163418
 1697694897
 54479787
 636595299
 1768732700
 1078712864
 1556544638
 9652064
 64085537
 80414146
 1762061596
 2012614613
 1046908489
 1662998150
 1618518296
 141255207
 1137949342
 1990805338
 2037927843
 1910495385
 1475735489
 1829331521
 124245990
 1656495603
 1334557552
 1614143705
 1457823901
 789180091
 903083216
 863320435
 849390318
 732648081
 1529052629
 2068376434
 438130452
 570166814
 43837082
 2074917143
 296324390
 1348757508
 719766785
 46018001
 2025597118
 140240839
 2131635558
 150693602
 1680436547
 520855476
 821990328
 1357187978
 348154968
 89707731
 1749669166
 1114552724
 1411739020
 2088856481
 354506456
 1935244065
 1160722242
 80224941
 1220234668
 159432707
 1498112415
 333389234
 708262665
 1937080632
 1054087965
 142536091
 331518027
 684613418
 193369999
 283669143
 978243299
 626859091
 468562373
 103551765
 492130664
 1503828344
 1444300373
 945011375
 1254754295
 1739051807
 2751031
 1510429982
 35266178
 2057677592
 324366512
 1603583359
 645008242
 55671731
 1632782129
 1184094802
 1191134052
 1044709359
 1151085184
 78560855
 1926210971
 400748688
 654187015
 1964035982
 1231795519
 637713518
 1453469867
 808615998
 1619249934
 389150373
 96245312
 961631483
 91634000
 1829986617
 372153850
 1362366728
 106748744
 534018610
 37537118
 1728972399
 1222407852
 1010119105
 180151081
 1649660540
 393681097
 1323027103
 719437696
 897269254
 394890454
 194238724
 573033968
 507317977
 1104595378
 728449759
 907601259
 1314060583
 417847229
 1604967091
 1247854922
 1436835793
 722763526
 1136414342
 9417787
 1478627719
 552282951
 334942075
 1659328046
 823727244
 355418337
 77483261
 1766122733
 1105747185
 1776937555
 339631979
 1179447942
 513265387
 279849905
 1636062221
 1391312625
 604484291
 2044283488
 385315781
 355134798
 1558697147
 1970625446
 966038873
 928354651
 379981609
 776385257
 1204739928
 263859815
 134039709
 1111311125
 1130037457
 1691866385
 255564553
 189819622
 867456469
 322202688
 572470074
 25115343
 1034571178
 2111054124
 433643778
 1216134987
 1426111421
 1916041926
 959663047
 172858516
 1712658481
 42082001
 1869957434
 422843196
 781011815
 245252902
 656002225
 2109337546
 1903853244
 1269789129
 1323408697
 1057049832
 1823671193
 1198395283
 793201816
 217345450
 44050821
 1415245751
 857206736
 1272894023
 1711374711
 402090222
 1211983454
 1646369954
 809942511
 922378644
 327888328
 1621586562
 614651615
 696502772
 1211415041
 1834451519
 1011476091
 1306454357
 1952166416
 1359339157
 43949917
 1956450929
 601033192
 1175389650
 1711173526
 1854276140
 209701775
 2019364576
 1722975765
 2096036944
 999804455
 718026428
 820135740
 132877628
 883521942
 888055887
 1903155910
 4990367
 1448643902
 57583443
 1255523272
 182365185
 1398590061
 1729717507
 189173310
 1305117006
 1362148289
 350912089
 904683184
 1718168601
 1836965539
 448496666
 430931591
 53808311
 515948958
 505893937
 1638357010
 542271453
 730140591
 1924533605
 401235869
 1573880452
 485302456
 687081713
 416904815
 54420737
 320239324
 43145204
 1147709185
 579540168
 1148812837
 1410975138
 117232232
 565434589
 545089597
 2144715699
 411908364
 1268428497
 1731186270
 1771771097
 938461980
 2036166051
 609091805
 431069537
 123962078
 782059505
 91503157
 1950470181
 1698493344
 728333713
 1284664928
 1734511911
 289906659
 1362953360
 485582220
 810065889
 1677729588
 1326647971
 546248908
 1297635679
 1091506962
 1374445953
 354921395
 987189355
 1524422589
 440741933
 2136520991
 88424139
 2146469659
 2089966531
 1104312661
 74943554
 1026713386
 171290749
 1606784504
 1559141060
 844684080
 654025961
 1370556924
 1614879930
 545408433
 789021327
 2093472574
 549279968
 306026773
 1222716008
 1979421317
 922625527
 1583953082
 1705666327
 212817064
 567898697
 635862384
 524161349
 1655570836
 1458823497
 473712557
 800976472
 1030568057
 139267466
 1898493048
 728084970
 55293790
 1065105807
 812578945
 396716115
 48180094
 2097148945
 1203577339
 730973915
 1758207597
 874229320
 761773574
 587826015
 1077640981
 2120392593
 1294734536
 284457781
 2049819012
 1155284531
 1591178968
 1919269907
 1538144526
 1236483484
 1838677966
 1693288344
 373881118
 961581274
 1216914231
 85595347
 1626713834
 78036143
 1168975497
 322900021
 1254767627
 252445696
 205793340
 928765657
 1327594478
 845401523
 1121720365
 2045145599
 738532277
 704081317
 324189278
 1565266720
 320438681
 1811189394
 1265544105
 415037436
 956770019
 1811901390
 1174200064
 697311538
 907810623
 632462190
 1287785920
 322492841
 826247084
 893630506
 762823389
 244268903
 1731001118
 1070553489
 1711372715
 491067676
 1279479935
 1644278894
 1782319659
 991817803
 1035283382
 1563473870
 1334431744
 1562079962
 744897887
 568350061
 52992805
 480163325
 1745550071
 251962090
 496127437
 357790168
 1778714330
 673014020
 394212718
 688570664
 67772366
 845252732
 1259145314
 1531070743
 697252467
 90113696
 351126134
 1119832820
 1589701758
 1695967275
 1295353612
 1746191083
 1009287482
 1013150852
 1286120232
 2139463538
 996995018
 1888342822
 257493481
 128417673
 277937384
 2086255175
 732820748
 664701432
 601024509
 39165241
 909807291
 1425815113
 1225202991
 741155674
 1060674837
 887586044
 1481104647
 222748989
 928088304
 1702029687
 400198401
 833921308
 1878212233
 1055486214
 1704577392
 1850058046
 1983818296
 343039655
 784326964
 269938074
 47287817
 792301657
 540673244
 607456201
 627685367
 1676578549
 1299008290
 1533099065
 197177278
 1997691594
 1425477525
 512364185
 1852214323
 886918802
 1400378680
 1016584568
 573997812
 1061392754
 622440243
 646345389
 1818259451
 2002814398
 1817751182
 1950724362
 1153955935
 1230171010
 1801441601
 1008285835
 1815688298
 547190490
 449409646
 716400151
 800520672
 1859415495
 1659028629
 833493058
 1021953283
 353283042
 1673929054
 332940009
 889976451
 489810192
 360876152
 628335137
 504032512
 1814032196
 1495076110
 200889815
 633052564
 1094550829
 1945571279
 135216672
 261625611
 891351230
 633960841
 228849810
 216409898
 1558920781
 1231841701
 1513072401
 172658619
 532261721
 2042115647
 1089830795
 1279818260
 1981279720
 398537337
 319265617
 915497747
 2053243500
 2021855430
 681133616
 391536557
 490425912
 1523860140
 2013737951
 1644605066
 894912846
 1203143756
 919388009
 915234182
 2095658372
 2011971602
 891430655
 1065406368
 795547756
 322649372
 382404775
 1400098978
 82895174
 214491198
 1571905437
 1354601102
 455389915
 1590592975
 764447471
 563052465
 1735277335
 1257819276
 1579440877
 1496937450
 720308293
 1593288762
 437789691
 1341753294
 1405431198
 1671222569
 200592199
 2029966868
 559137229
 633620945
 1657851950
 1521827382
 1696747168
 1586632351
 1694219910
 1446086308
 397245766
 667585583
 558879055
 1409247838
 1621498802
 1471598030
 477379972
 857943383
 2101947886
 115844425
 1691530947
 181157004
 1883133943
 2027937710
 318127276
 401944323
 869089282
 288572856
 1356300755
 1619241106
 834216953
 828041513
 899354007
 298975365
 526391084
 1851224274
 156151490
 867505443
 1622195923
 1885275072
 1915640977
 185520917
 515429845
 647462345
 1220394361
 926967213
 613657100
 1233708194
 201823336
 15355035
 1954236504
 484396362
 1294022770
 704440422
 1602179411
 1354510994
 1567962466
 1663684307
 1463943871
 482503675
 1042463765
 1462231648
 1338939878
 218508011
 597180451
 1495301502
 1139462597
 1210765985
 1487823996
 2092721770
 1365284497
 306568151
 2145783368
 416804467
 902481316
 1525647365
 1055769730
 1905234317
 950539218
 1052712354
 835240791
 894137432
 1099215587
 1107025561
 1547765107
 349501242
 2130395988
 1755496946
 1161352576
 39844424
 1456067821
 2071091134
 1068827576
 1714229314
 1219671035
 1199269727
 1986521255
 1811743385
 248651107
 2090900817
 1511753700
 1874623282
 338380981
 957362681
 1555960369
 312804027
 1368331735
 1506366596
 1983844361
 1744725702
 1431881609
 412050891
 641865917
 2055293094
 1940658071
 1700543001
 1186893345
 1293673531
 1352054751
 1202170977
 578693257
 597557589
 1549785752
 1811542275
 1641476650
 331179730
 160106141
 368668367
 1499224730
 926562992
 1164820979
 898336224
 2047662597
 1783874442
 698307531
 423235212
 605402195
 89510162
 406055284
 772658412
 919572152
 370474585
 659818602
 469585481
 1051937998
 386948856
 1045335328
 1021067539
 1134415671
 733951897
 559320425
 1207558065
 715844160
 2007844391
 1767751797
 1615502551
 173978008
 963033649
 212548285
 1695698373
 2955396
 656594979
 1320486718
 1393729334
 1930520525
 1159349102
 1599646889
 810729273
 1129329349
 333147318
 360831357
 2078261147
 276964191
 1566449125
 214492292
 1213511228
 2133569112
 338203886
 178398735
 1684486167
 207811103
 1100281604
 597688614
 1557903002
 190739079
 272352960
 2041775585
 1932418644
 814363113
 657386564
 1462569355
 1749000620
 916073183
 2142069434
 782370391
 482387577
 1775638695
 1702444281
 1380573874
 1451504804
 17506571
 339957982
 1322385056
 1387340764
 287469478
 1070862804
 1433995636
 58786366
 114171103
 684212384
 1369481972
 179068843
 195731919
 1354235583
 1994975342
 262633971
 241001689
 178204797
 729380581
 604397683
 180853889
 1150016136
 227150302
 1855315642
 1261267594
 394470535
 166892090
 1658271635
 1142390534
 1192771142
 880834614
 735677837
 888140815
 144617412
 354697148
 828071031
 829491148
 128870973
 1569699420
 2063842355
 1267605722
 1785994885
 1962958359
 2093087180
 1526053691
 1826926815
 312489331
 225620196
 547928985
 1362135450
 1282892972
 202929790
 303367513
 1271072992
 456672987
 324340805
 618334255
 1495206071
 1167291238
 426945471
 689747314
 1077909691
 1734161250
 1226145940
 509385003
 1473567349
 263445177
 1681347039
 1806587672
 1891795845
 715951345
 835807105
 851968803
 1977330728
 1938201479
 1385048598
 627953898
 1457319870
 1993647616
 735413742
 139803853
 511502438
 962782308
 364079216
 1709382571
 2030667227
 774436414
 1337259499
 203493596
 1167684369
 170919559
 446732955
 1028083868
 1334296123
 1170622329
 50459183
 1443117392
 1287287843
 137997205
 1559860091
 1780510524
 486200028
 1186022316
 1734430803
 418674274
 1205551964
 1278732772
 958008506
 165235805
 793433851
 1386283277
 317596421
 1203898554
 778655403
 1544362737
 838556957
 1483274545
 675790589
 1496752504
 1541778032
 242230212
 2036789403
 1420693643
 1204185630
 269830914
 530449887
 1026975897
 636376309
 1614976239
 1843209108
 492785906
 1897777920
 660542134
 896572164
 1682245040
 1038886863
 777352454
 1210615016
 1394691733
 489414383
 286654009
 1504407804
 841419622
 996272381
 2056579219
 2144624980
 633305347
 766163590
 187724052
 1521072886
 1629903371
 1600902457
 827526811
 1596540356
 179828112
 44999232
 1914392930
 1295671860
 123186960
 1815080959
 1594947136
 152768683
 239855129
 1397673720
 1329696994
 361670868
 1819480864
 1565257089
 1034493749
 1864807658
 930786282
 2029132332
 1386433891
 1639105181
 1729087911
 1492769665
 1947570195
 459025189
 139618825
 391870613
 1970525988
 168642061
 220998793
 1799947969
 255326100
 360666325
 428578231
 1266753955
 2073229568
 1891956972
 1141595642
 1421964204
 1580761619
 1891876600
 2022869853
 1678080375
 38463742
 1273620266
 610598484
 1367105363
 1096899456
 1814162973
 1225621539
 88848254
 90228123
 766725335
 350152056
 1505552291
 129897746
 1870623805
 574151281
 2021892836
 1631230500
 1590240099
 645090318
 578616695
 1575891698
 126000844
 469587564
 400147586
 911784844
 1342041863
 297587418
 562894731
 1187519196
 55666520
 1754094026
 18478211
 795500414
 460443036
 1400811038
 22471509
 1956692155
 1886212264
 950796433
 67872503
 148715334
 1615261542
 1963941922
 421063258
 2019775500
 432843140
 1752624915
 1058031069
 263540515
 1736559214
 599654242
 1328796237
 389921410
 340896050
 989712878
 844781728
 2779571
 1807515184
 1218228974
 1623267790
 1401341925
 5401978
 1202131382
 1710158154
 2125545240
 584210848
 65982259
 801066740
 544772197
 493064310
 146926970
 1217018587
 686296702
 757103771
 1348334684
 973038866
 1212758317
 1977708670
 1141903039
 907113124
 664020221
 1219196231
 86141907
 1463568592
 672240662
 1792730917
 1261132122
 1734659034
 550089084
 1082572642
 318386674
 211632677
 935767527
 1359029940
 1189378560
 2126775728
 1399431933
 180949189
 1940646302
 1457535097
 1219280936
 76317518
 362704198
 889701228
 1905108070
 1958030032
 1530248562
 1331287210
 208720108
 872697195
 1447310234
 2032110872
 1378997747
 2070751811
 708367580
 518432572
 1446618167
 935569201
 515076154
 1784812455
 1794587703
 1324096928
 727151685
 1281499267
 1552151319
 1649380247
 1314897222
 1341005747
 2147481733
 307599355
 502351231
 1124772879
 213718114
 1575875544
 1339612229
 1230723703
 1384255295
 1048360198
 1707512591
 1787307807
 1629737709
 1195786848
 1198903355
 1571426203
 1689803028
 1302162258
 1889251910
 1017089150
 523219529
 917005352
 1307849998
 1327923994
 504264752
 380287580
 692922036
 1493864486
 984570056
 1364473913
 1876772213
 896962982
 1462099489
 2138469815
 695376006
 1720354287
 857902417
 1350202790
 478169410
 885157060
 1463872561
 1837777718
 271515186
 492451984
 88591897
 535999124
 275207352
 166873784
 1622077194
 727473549
 958753520
 1626237938
 481751022
 191605427
 1457601742
 1390856792
 490237707
 738053287
 923443799
 1586287066
 10282499
 1006094103
 861613762
 836293957
 679612101
 317362924
 1738061399
 14017374
 1611985410
 1642504404
 1057553247
 1705404536
 969217501
 2097168299
 1409166382
 205772771
 527944684
 694370246
 710078234
 139870515
 578142145
 1272062962
 181496855
 500110494
 1814672393
 1390386259
 2082078932
 825056825
 450160544
 2088182459
 329378572
 2078862614
 475173119
 1606014789
 1794586861
 1879639821
 1589321089
 46791300
 1226452003
 213383479
 2132647751
 618783088
 37305254
 290749606
 2032592549
 1294209666
 1914488704
 918923088
 323153173
 879918860
 1157980540
 1401163800
 1763516711
 642963454
 1641706403
 35889342
 1852983226
 2008948721
 214406621
 1110957936
 1103865734
 642353917
 528940114
 514047777
 1212064843
 1841034560
 1168659093
 613795770
 1056476987
 1685961278
 1779464081
 571128524
 1994420355
 425145094
 1932837452
 168776558
 1181259320
 937566277
 34196129
 1225202509
 417591174
 695845415
 290419217
 1410151066
 1644200338
 826298776
 1703037324
 1733351303
 142438359
 1863096328
 1378184620
 1915955614
 615904955
 267912869
 435418630
 2041831117
 1323492325
 867648668
 917885218
 2703345
 1906265312
 1597012346
 1396765134
 1048630931
 406392004
 1420822361
 897127378
 850428910
 972483308
 1935227018
 2004690103
 1945596331
 492455657
 1608508117
 1758812955
 547656000
 379414324
 1132841274
 566719880
 414398565
 69015978
 523602326
 205488593
 60725143
 1110915643
 253579931
 1062627263
 851134511
 1623453331
 805242325
 1330088619
 1206647106
 53760328
 1017187426
 39750491
 1968020766
 919712382
 1446357925
 423765736
 2075617705
 1130744900
 1513900553
 32506022
 1550411257
 881768112
 105196102
 69392948
 1021088579
 1699835353
 1407295765
 929688776
 1856509118
 1652716297
 1435452814
 1780020169
 1426711765
 1458636799
 70885233
 1192179352
 1833948614
 489547738
 1224570909
 1928049551
 815570671
 1692013799
 1319025545
 1511802879
 610324537
 560730546
 1588922282
 1751142081
 1548162859
 1514163806
 2037809347
 1723702870
 2144938931
 1234361840
 1260613125
 1828155630
 1195768369
 2046064105
 1942772540
 1002144618
 2114161070
 306931336
 1134892288
 842674605
 1697419418
 278373807
 1388942800
 271158526
 118073158
 1197710877
 815405995
 915909630
 1285595814
 408612307
 1941266549
 1133285903
 712599493
 348403523
 1683817224
 1131086915
 1522290614
 1248742342
 1497447632
 1845481604
 1077930564
 250667241
 1647443721
 1054308537
 1739292403
 1500815383
 890045014
 470761884
 2109440891
 173357975
 447897881
 943267389
 1412434611
 358676616
 1677999840
 879958683
 1161306691
 50721120
 1971517791
 1699762067
 211741876
 359168444
 894051617
 1541212953
 1572909545
 1239519429
 694512674
 376538517
 23276604
 1039831760
 1428453217
 38000969
 558067740
 1988635450
 1110204270
 1436543516
 1962847412
 2124538180
 1085158304
 348080714
 63371984
 658031043
 1325463302
 1381104852
 1155030208
 116080391
 1480374612
 1043410445
 1021843192
 1550159152
 1549346811
 1105736692
 605059343
 818001974
 522182896
 1129215978
 1778682106
 1592757859
 2117431128
 772143694
 2036335372
 1902877100
 986735469
 958501033
 601809703
 1060578224
 768532430
 652783892
 1155821998
 962396655
 1816013278
 325838977
 1171434684
 791076621
 2110554666
 335404285
 1047239128
 859120617
 1652911954
 973457196
 726579967
 1523094323
 1295045334
 40862920
 2137539160
 939961347
 865859649
 550626696
 838085245
 1883102806
 1317691767
 805706062
 1357787279
 156622612
 347610019
 1184033155
 270058911
 2016591949
 726416207
 767540092
 1020935745
 681659914
 362043399
 347247929
 763777409
 1817595090
 1118013142
 2016440962
 570201222
 1507485530
 274503807
 1388359319
 1031058640
 1363093139
 1822562048
 501283422
 1753882849
 913596933
 442476026
 1107841458
 1483580395
 1664986747
 1216584862
 478083498
 688118554
 374625979
 2036572128
 1265888029
 1883234246
 2139279132
 1213292811
 1113167853
 1906376763
 334095536
 2021903575
 718644833
 847974949
 1960662917
 270665413
 1233669130
 446973488
 389356865
 996770502
 1333348334
 318221957
 778651178
 1164810814
 842496794
 837550357
 1012673479
 2137736962
 1246671685
 95302365
 622443015
 182757657
 1430219820
 1253432888
 1356016283
 1175849174
 1352725059
 1306234327
 346536678
 280525611
 1836211424
 1030296769
 2083494770
 816454410
 378860523
 1178859330
 2002725467
 155858002
 1106964431
 1199874696
 1684233653
 1584935513
 1571266549
 1076056236
 1040566528
 899242830
 45417870
 1077290952
 46369461
 2134140850
 1367801250
 1281717006
 1420912662
 1186091511
 1892550529
 128634175
 1507438595
 2109489159
 1429480706
 496397102
 1799596610
 206396701
 172829757
 2147482498
 1708475170
 1174754287
 1878953785
 394487434
 64792414
 1179226961
 1126678828
 1996417491
 349101126
 428746222
 1128210512
 1069845920
 475654979
 499626699
 673846425
 901732347
 1942633415
 1094433460
 275600459
 1050001321
 1809617428
 2019571995
 1013359597
 53964165
 1181982291
 1427493486
 2027164720
 580065535
 1546023789
 975719311
 1745419914
 700371632
 456364360
 889539299
 1455754396
 1092917264
 525169603
 991087701
 181836052
 1105230303
 1520757332
 176392061
 1899364104
 312055419
 1542267092
 493954413
 935763104
 1707675526
 946253199
 1303436895
 279018997
 2018156853
 1535516543
 1648491810
 1866179070
 1895593174
 1282166024
 674379149
 1802910694
 1547439647
 1334053051
 1624693294
 1724677453
 255821368
 70963546
 228841740
 108833119
 149348625
 738955396
 449388762
 845403233
 623855159
 1583440930
 1844930505
 693719504
 2084757205
 1266988993
 1878183057
 1537167426
 1032129155
 1701752883
 1362001932
 1823822333
 433052403
 46907895
 61094588
 127370888
 1151121441
 626183488
 776165595
 441474403
 1346421347
 1311679624
 441718151
 498161316
 2093652985
 1473909762
 1390811323
 534163820
 1218230811
 1756023407
 1490945657
 96681149
 1137607281
 918113560
 797797803
 1672108442
 1199501947
 2075947732
 58999646
 827679845
 1899568760
 605344089
 174643760
 1166515108
 573984031
 1920817956
 1732896281
 1632021646
 714771855
 1207927377
 35533729
 685707834
 823882272
 1828128251
 115672110
 903480833
 208681979
 2066336921
 396362525
 1184976111
 1251018810
 1103053161
 900440374
 666749500
 1849230477
 1486514071
 271249178
 1734449299
 1921776122
 1673705846
 1876977063
 1680344649
 1603040620
 1728862282
 28877156
 956813399
 1939002789
 1045081592
 781737300
 1104027934
 1331105101
 1764982101
 871376724
 320028591
 166086976
 417735488
 265993582
 1784608695
 320892276
 1607674378
 529137101
 554868067
 1816532405
 2134294447
 12639901
 1056286999
 664997394
 681526873
 333176540
 1457066492
 156952682
 1918822667
 643670201
 1056305112
 2002454193
 1610575863
 1952705457
 1145764725
 1528788058
 632589133
 1586640093
 1048229110
 1555414356
 375570897
 1732832587
 970960788
 2023661216
 1321828601
 1606345073
 502601904
 28581951
 1622424311
 1208679205
 215504282
 1045513845
 638561776
 1915174550
 1978483403
 787541553
 1073152666
 2021028544
 445018257
 1942915591
 56601055
 1208231300
 1793435948
 153008390
 2054402444
 1963141863
 1822423868
 118553752
 1772760646
 1290100172
 1112950311
 986064255
 2131775123
 877567441
 761444991
 1924706093
 607339094
 1874347364
 762845819
 1912736610
 771816361
 1253677846
 1260454675
 1247491457
 1998862298
 240165063
 1883939359
 35841549
 1478293187
 1262021207
 431049562
 399663846
 2025363083
 743933365
 1889322007
 318997011
 898659733
 548130047
 1243359070
 1294095067
 492431567
 1088572021
 1770467990
 1889946574
 249839857
 136606747
 612628511
 2037429257
 1470721688
 2062651853
 1603535222
 20046197
 652335260
 1338178020
 916794349
 1326671333
 205962797
 556334909
 1719993465
 1126168065
 1088590812
 1305588731
 718095447
 1891171127
 2126889138
 87962784
 664649033
 1948525806
 797030407
 855280490
 1286351500
 1221897352
 1480793415
 1751433528
 122152504
 235465336
 468109740
 1202033528
 434548039
 1348739401
 1662188159
 188178412
 1791055716
 445789921
 1176271555
 970364432
 1834718564
 308995117
 1709026890
 2081644897
 1599799447
 1250370591
 329255140
 878365773
 1794347071
 1454248205
 83226388
 631923806
 2103393600
 1910862453
 1296612903
 1714579046
 790771480
 504953326
 1970447375
 723654791
 51412331
 1024834702
 1225984475
 746224448
 1403906972
 637975780
 1740226169
 51981713
 430281363
 1642616496
 461193995
 1143939025
 695900375
 1998059979
 2016386365
 1427637626
 997253994
 977652232
 423837576
 870642181
 304401292
 1244352314
 1187398029
 1271525292
 268503892
 276839319
 1518725339
 1968736912
 2007727536
 1289175072
 764222631
 12070040
 449904697
 1577261827
 875556257
 1827010957
 320273970
 1216509596
 189274455
 130224849
 1039255494
 930603304
 1530060513
 314674223
 1012520824
 585152895
 425937248
 311696829
 474107042
 1894560050
 1956907958
 1752224464
 804635619
 474887470
 1464210853
 1748602139
 806552487
 534764813
 874492951
 1131109612
 1817934868
 1659898235
 1813760359
 2088712900
 358661534
 2143312623
 327663543
 1245646064
 1569004364
 992730510
 1004869092
 1622935693
 90334693
 1181578896
 1117037437
 1360350373
 567660766
 911644562
 589033531
 1021306007
 299084758
 173096812
 1742080594
 833334379
 704669223
 364032077
 827091412
 1514450921
 1765731671
 797696832
 622031007
 1072628113
 1741057314
 1253004201
 1370309990
 1603632803
 996942550
 1500700050
 663308094
 333044900
 645081695
 133261012
 1329014796
 1863980532
 1470150137
 1490646458
 1162041572
 788886116
 955586629
 460179726
 977248544
 1992123647
 939422279
 1521553059
 1772681595
 1756495169
 1701143370
 1554239484
 1225023535
 1244544935
 656901873
 578258616
 1680297426
 1284993408
 867507659
 46514658
 1744607033
 715909218
 321213530
 79571688
 167699828
 2041151574
 19270783
 1112226407
 1135187152
 1700240270
 846873962
 355014516
 307157811
 1555358066
 366008873
 1466082183
 850377750
 1355408752
 524804450
 1027588790
 979637023
 1280776781
 862994047
 829924970
 353528319
 1629210566
 541190232
 392008272
 561775340
 1398937708
 1905518678
 567034779
 1464011214
 1746154703
 2090919660
 1494628339
 1996882216
 439053032
 473185144
 708985952
 1515105324
 1013431799
 1214285997
 65869338
 115357330
 1632460090
 1866396572
 848558714
 541258459
 2071767186
 423041857
 210491568
 1588285834
 1343431450
 1538228323
 539937479
 1651074693
 726617281
 315309532
 752783745
 1703657788
 1605448676
 25992087
 1542232856
 528321790
 39676384
 864841874
 1066715582
 725748675
 607747021
 1660189569
 557567171
 532913974
 226226090
 795173451
 2134186472
 115805517
 666506723
 397441639
 827258629
 1574723164
 1257020952
 1848539311
 478121172
 604672196
 1228045390
 260187397
 1753205296
 1619506141
 113068971
 962284823
 795959262
 860405147
 1860410545
 204387908
 179328833
 1541057241
 138412968
 404796902
 489359457
 1392053379
 1031868580
 1258308958
 81843983
 1631030171
 1028392014
 288964490
 114818127
 1521677104
 1650474158
 1423480473
 1285683125
 1640496827
 1022085435
 1373202900
 1327220020
 3675648
 485408351
 2047836223
 1029055974
 1900327807
 1835987974
 1182640073
 330785069
 1584141632
 1828200413
 687602070
 1364885454
 1504305300
 668842233
 29837434
 730725456
 1851768321
 1900496248
 196330035
 853934075
 461177334
 2069714079
 228747517
 325252713
 1944213605
 1168226842
 736668530
 2017587416
 1952186230
 1595963190
 426902132
 1063653208
 937308973
 550607623
 16337423
 731127676
 326964178
 1256998701
 1189201137
 1773533842
 1933640295
 1231626720
 1120391932
 411967139
 1978775418
 208638301
 1971847532
 689170695
 676121420
 830561721
 2034043637
 1408021947
 478675371
 921716631
 295672777
 515389821
 389909491
 977345263
 1406151393
 105024075
 1246041869
 2088807689
 1811634558
 893097609
 2060422836
 197748488
 1906072448
 1918387540
 588141233
 878579018
 1797683850
 1932396803
 1758909708
 2117167855
 653415478
 1688627588
 185057377
 1794997591
 698776910
 1055474257
 1339021424
 371697746
 169470159
 1967409430
 459610203
 1138260348
 1658261357
 2014421367
 1773540681
 264974782
 386566850
 623191314
 1919183537
 633361444
 1826628871
 1954782020
 1497199194
 779112807
 1458136279
 1258808315
 613635117
 1677302814
 932368231
 1911172074
 637056162
 2023069527
 1656199546
 40027324
 266123985
 781186895
 1854701695
 1859207541
 2032114489
 1740848213
 755304653
 1402471
 257605201
 524477573
 1901933912
 1416486551
 665219924
 1956374474
 1841597756
 1081458845
 742761650
 2068500372
 1659360729
 701336329
 967538316
 159998062
 1356690492
 1035565256
 729340205
 1490147208
 1719630182
 1651133083
 663807933
 1927387694
 509543147
 569280970
 1434809869
 1728281542
 739448047
 1677016789
 219935289
 50112862
 1742873471
 447632724
 1577158016
 1271078710
 1764489503
 1708453592
 369734817
 835888506
 778880811
 1093564331
 1126110932
 977323536
 260765022
 605586461
 1727403985
 1102658433
 786466107
 1430911215
 1323426015
 562187484
 2025037009
 278066879
 1286508664
 447838556
 1607059271
 725664216
 1687852493
 433894460
 1516893108
 1459695451
 454876418
 1350169814
 1324837586
 1977642443
 184658767
 1860289026
 2059515725
 1221365775
 534379517
 49154571
 568193876
 85938224
 241879619
 604295188
 940325346
 1414165093
 167251964
 1058589435
 1895318463
 5445686
 478856363
 487280133
 1957037175
 137967563
 1762152804
 4085135
 361880494
 587999231
 1296783381
 345517311
 1415260082
 1017745388
 1132260278
 649813080
 1847012592
 1250591739
 1239390484
 833663452
 521970541
 76228665
 932709767
 1241625713
 2063956819
 98994990
 824646280
 1989940358
 1880848737
 1997267914
 1803505760
 562288360
 723971690
 1671703694
 825725106
 1019633665
 1594426881
 2140379533
 2080483601
 1590445366
 2023037010
 1308794504
 910868424
 1661395521
 1869854446
 787874351
 1328635498
 2044237407
 1699036736
 194975337
 1905509228
 1450192344
 792975384
 649893460
 367745412
 1986078505
 1960228772
 18288485
 69886641
 545631455
 551479104
 746855949
 529873577
 34581702
 1486903051
 1417504038
 839511796
 361620571
 1771366239
 1636599382
 1860473513
 2129990566
 99752007
 218937727
 823155204
 1031885038
 813262684
 763233366
 96633659
 1494899510
 585748043
 1632236231
 1982383725
 2063499447
 1413871607
 288301858
 1368530776
 1275273098
 1016596962
 404834651
 1827592130
 876325889
 2089475735
 74618752
 911776278
 20554933
 1446437815
 115607876
 144505692
 680493880
 1032690161
 1871779772
 102672397
 19056925
 143217370
 1101961254
 474144230
 1104282222
 801556818
 1193533794
 763633495
 745588914
 165410761
 208783169
 8275161
 493640601
 1892716419
 1383061598
 2042200296
 1109794944
 570944799
 1793967167
 1345739646
 1361288459
 2044840607
 50391902
 2076054103
 1894430854
 808611225
 1211622242
 949385104
 423203476
 360492088
 729408261
 1385966535
 1492581555
 1167211695
 1662067179
 920346566
 945016570
 1975249948
 1844973133
 1070577624
 1265800736
 1655774689
 1800774617
 225962517
 854583329
 1164032452
 442710677
 1573704457
 522289205
 423961771
 2108607487
 2000419548
 763618065
 964145054
 181695166
 882282556
 625124683
 1209521563
 1300635235
 1208520160
 1503489712
 537572707
 1750923272
 1432466854
 875119237
 1266889918
 1757000449
 1281671484
 78990699
 1766824629
 1492300178
 1350864198
 2036147263
 1689688424
 2053232640
 913669815
 1049475987
 578257376
 270250290
 1613162057
 1702338104
 1348883982
 1092518747
 696453648
 1130603613
 769615805
 1771976687
 1863886334
 2142354737
 994053912
 801467185
 1686533362
 539321007
 2071176860
 1366678015
 909730239
 1513617293
 950758912
 412954497
 1398563850
 540559856
 1059559582
 1259928552
 1574623220
 41056116
 233874464
 87165262
 119935920
 564540571
 151351403
 1372384776
 1142828096
 1677512272
 114498941
 1538278387
 803260044
 940760632
 1738760577
 1711515886
 51154313
 2059507697
 1542783899
 1442305462
 424037506
 1396118752
 1254045537
 1682130022
 1237014795
 1592629355
 1865745850
 468926227
 453456586
 392135263
 2146991302
 1591801014
 115193394
 1720393679
 1083800681
 1470825634
 158424836
 98103993
 232591268
 356379905
 1177427898
 627594405
 57723901
 1545391138
 1962311615
 508709944
 1695507587
 1819584574
 2001444637
 177688444
 1297298094
 384418678
 1496623061
 654105051
 1704646091
 1386652279
 2119812875
 1920364890
 417655728
 564904153
 122741407
 834529185
 977223964
 308672896
 141057128
 682612355
 6721400
 2047871705
 1313395463
 1299489568
 1550049142
 334521170
 1301111433
 143371480
 1421545895
 240379472
 538013493
 2051134891
 256946917
 624841441
 213087890
 961168693
 1229509209
 1762149201
 1973827613
 1190228903
 605195122
 111540762
 1585023175
 527954489
 286573361
 2136928716
 1183621637
 440460800
 260439863
 1692277317
 1330910236
 1562657429
 934682492
 1715498228
 216312163
 2141443892
 1195571649
 1894004147
 872792065
 592726312
 140235376
 922542818
 1216908339
 1911170465
 761940148
 912072685
 1063733588
 2004482220
 1546961047
 1365672795
 1098543807
 561368472
 653887921
 96051723
 2020983072
 779102013
 265963790
 656474513
 2137481324
 988241975
 1078042641
 2046117156
 51468244
 1461647154
 655266672
 87983585
 1976699053
 659875180
 2019687998
 1071965419
 1308025071
 1535808108
 391600030
 1149207658
 193175189
 1647945109
 428234298
 2118278389
 1040440520
 1580327221
 134648075
 1591638211
 488296128
 1423548286
 1691290426
 719336812
 1726291260
 357496739
 1676709010
 1689637899
 1889357838
 148062876
 1817845374
 250896708
 2115392051
 301792136
 1181653497
 573829032
 1064992249
 1540299889
 287742830
 459134449
 23309634
 386384275
 575369394
 1165376411
 1751722694
 715062187
 1319222223
 954540872
 1760323767
 2054266951
 1479703556
 1163871880
 1343219193
 1307214455
 1718342928
 1415922296
 124812805
 509152825
 1544301850
 744256264
 29704383
 1840826375
 2093741162
 411743207
 658930141
 997944360
 975698550
 105567122
 978002389
 1385538155
 414457759
 1203465858
 691385178
 1085487486
 1063773226
 1036115492
 368288638
 1282830617
 1105382728
 224846717
 261381055
 2216734
 1848094327
 306665627
 619700991
 351726469
 254916318
 1719255364
 68005703
 539900422
 427121408
 1606337824
 2135173400
 1782746855
 1050128946
 1534716321
 863062481
 2129596368
 1717271056
 2052821672
 891185986
 1214198498
 1407280542
 517976886
 1777626049
 601948513
 322069396
 1318533354
 1577233323
 619128702
 1646271561
 1747531841
 907077527
 418047309
 927599565
 927680156
 324550547
 1903236227
 547626878
 1762533564
 1121195945
 407388547
 694413907
 1551576919
 1143193645
 1167639408
 47019018
 1398760075
 898327368
 705157799
 1551020515
 1355599321
 1996450281
 1826686322
 1626355583
 1252830850
 762270510
 1950984076
 718850493
 1210620927
 802075535
 1645756050
 417793244
 688502164
 2039965285
 1416867312
 1094109743
 1961318788
 331052623
 228527689
 138128356
 993956285
 341930090
 1412796533
 636194861
 1932775046
 1843608381
 1608108002
 100156369
 1876850329
 1136323061
 285506216
 2116173662
 491007527
 401121045
 1110714902
 760223619
 369702464
 446155545
 374521183
 1545224695
 1829403263
 1181999304
 2135581008
 938163606
 130866696
 896901352
 1830894423
 289148082
 784226366
 1627374939
 891373875
 1124125412
 994773358
 180899244
 806494410
 1867843200
 186296144
 1333196582
 1508940230
 921035580
 1867857039
 1766059380
 158818898
 1586080151
 1290928807
 972935341
 174255172
 794795826
 688416951
 898550553
 1978694130
 1145989524
 781517957
 1571481034
 1121946363
 1824213365
 54891128
 661888816
 1361187203
 120392809
 1326529328
 1449641283
 1188621221
 1802146755
 19527493
 878801087
 2092511380
 694369413
 319262857
 983953542
 97334563
 1076484242
 1832767713
 1559816053
 1468223622
 1637610036
 7540242
 966430997
 1257739896
 1732805183
 1895767827
 1335734928
 537404445
 40740496
 1767986777
 2062238645
 768612611
 2108631481
 141961485
 237092809
 442954938
 2044103150
 1419290827
 904388221
 154192145
 1598817498
 1955708452
 1646867810
 1565388986
 612903388
 1429675187
 862880238
 833022044
 31254591
 1283938221
 1931564951
 245105453
 308567191
 2142596739
 1145246841
 808051807
 422279944
 1599005998
 1109672878
 2139306117
 780635272
 637389493
 555944506
 59064578
 674440070
 646718905
 632062036
 534163528
 155955863
 2097433990
 543263646
 1606925628
 56701259
 378440653
 1698475188
 493688211
 2010479006
 1570929225
 1086743807
 1297548336
 1047593660
 1454044685
 1147418894
 431617712
 1928315666
 1943122421
 293845306
 933445195
 1879541026
 1151600524
 134106682
 2044694654
 864321300
 1029204071
 659934638
 188082678
 1723600513
 1409409339
 1421323817
 822171145
 92316484
 1067660081
 284693927
 1836859473
 523900877
 328772377
 1965341702
 740261934
 1840065728
 577556375
 332649207
 438280719
 2075819738
 890621683
 1862832674
 1350496415
 753262341
 1740740281
 1043771283
 750198822
 786309204
 677203424
 370790480
 1768860576
 580286513
 2074898100
 420740501
 75451394
 516106697
 906487173
 210396494
 1397815749
 863726242
 574862679
 1195211817
 839095195
 1974358340
 1344757421
 1429330059
 1306747630
 73740818
 79262368
 2081562061
 1761676082
 183538823
 1997193779
 535450962
 448995929
 1130838683
 689903309
 373661981
 1671325311
 159985919
 1676873715
 1391633109
 8905698
 960387979
 2111184883
 691545899
 1791011138
 1929975618
 586464315
 2065745888
 611946609
 367495106
 686736258
 982940518
 1216314530
 1638159640
 679877635
 1509269023
 386418616
 2060884392
 1143380792
 748317668
 72503270
 1988856652
 1392868634
 1683603881
 1854375179
 2093497740
 244828183
 1516594767
 362309454
 1038184371
 1922214756
 1788313347
 891604752
 93085146
 508804036
 59586436
 1336636731
 674577045
 1611147911
 1255243207
 749357781
 1497838467
 57277068
 824392701
 1084430105
 244344025
 1017069511
 1673198695
 1692023841
 669376292
 1153016219
 197781325
 1149198126
 163339676
 62046716
 227959743
 1904471260
 662901618
 411756580
 997785948
 1876993465
 1025647777
 1439245237
 486643054
 1576562592
 2082863127
 1872905463
 2058562633
 1030758694
 2062070998
 2045445082
 218616334
 1811235395
 1904582796
 1184895220
 1342907655
 12733003
 1197062983
 651740440
 81113440
 1538628274
 420571151
 651865430
 459461220
 673029771
 470460555
 1735721262
 72261593
 1305955678
 1367817175
 208483171
 1445970852
 1022633563
 1537641737
 1909771767
 1062223679
 857142050
 1061365674
 1523975119
 1239236608
 1307023408
 156846004
 1215440978
 2008811475
 114047765
 175936971
 396019059
 1767771718
 1714988781
 1628080625
 1205181817
 1211463700
 1077877042
 2047464173
 1825815346
 1527173600
 2333259
 101748590
 608210165
 1003456847
 1267070813
 104053612
 1579821898
 2110640105
 1234756273
 960995669
 72138366
 172466171
 360212034
 2137104774
 158949553
 1449644010
 289639005
 1945502269
 570981525
 967851910
 237700491
 1660958536
 1806749695
 1833321034
 1044474229
 216559223
 613041267
 1211632993
 151191366
 1939832965
 560204078
 2039051722
 1992362669
 1378416900
 1475030787
 1034589732
 540265864
 2070683807
 1014569418
 957660685
 459198491
 1848524889
 2048392292
 1314613624
 873388039
 1596458426
 1639611323
 799917337
 1772813345
 20616196
 183042328
 1518443210
 196202192
 8753350
 163506272
 315836731
 238142932
 1132853823
 432013271
 1654829824
 1446771953
 1928528844
 1307353380
 2091986111
 477063171
 664814522
 1950392595
 1020294307
 588203990
 1502028917
 2052709838
 2062123759
 1540962233
 1497617594
 902377957
 128538178
 919794141
 183308344
 1138220517
 198201019
 962314565
 377359559
 93259294
 1273103651
 882347255
 1556937389
 194330502
 1739128617
 156630047
 442421210
 744438864
 1622526795
 1390121756
 2101112207
 1483310149
 1099215542
 850090440
 353323933
 2072666179
 548366078
 379300280
 698378367
 276673175
 1343718101
 1634859197
 1050935615
 1204582551
 777741433
 1360279170
 2112331394
 361724065
 1936417136
 64790570
 1502238376
 1317491545
 553354247
 1034569238
 1067174739
 498979605
 883040433
 1240056165
 1327380288
 1392079976
 203452478
 456169590
 2045737016
 623488302
 2063589206
 1246995696
 1237523086
 278642400
 92975124
 717939477
 1239372675
 1526757919
 592208090
 717310238
 1552356559
 317309623
 898474921
 17429031
 1763984369
 108229107
 714323354
 252662392
 852847442
 383822891
 1894754656
 437612851
 1581319226
 1554193390
 2109629472
 1901792638
 663323470
 2116581539
 489144782
 1875429636
 1260855460
 2001785507
 1185419352
 13019213
 1840658167
 1200457682
 620959675
 1188457678
 1054159422
 1412120826
 907466871
 2001170094
 578741527
 2033859399
 1525808880
 1868019933
 33572973
 1484102465
 1428754649
 1246435512
 1264554814
 631572987
 2131281010
 582725048
 1658796026
 1476762779
 56365160
 1128024676
 2096983406
 1100860777
 187569486
 1404151349
 1698381396
 571364256
 1204611649
 1207808997
 1573270267
 1137030096
 1258382018
 613552600
 2046333691
 1708201530
 564113941
 2010751200
 345254714
 307448466
 1460443271
 1333013460
 2038649186
 1309029770
 1897282324
 682062652
 483726598
 280594364
 2002749550
 139932151
 1782831535
 607597569
 743567585
 1380033981
 2103287822
 176772043
 463606804
 703736593
 1131430843
 1044523721
 896938141
 335124502
 727421769
 1422763037
 1846082044
 1492860693
 1118847708
 409890831
 318396971
 1052971576
 236669040
 1539399956
 351771126
 257342225
 275418696
 2085931140
 783853322
 1463296940
 1392897568
 1139187072
 414050936
 554058243
 1164806108
 1645057968
 700859858
 1521214258
 1123643431
 726568758
 810453249
 1563428097
 1631600450
 10771058
 670708956
 506477574
 939025369
 18904999
 245982923
 1796701565
 1649219306
 1983326847
 249612773
 1098696461
 1776485257
 474914085
 1724404589
 259884758
 156862690
 2123053749
 1405473458
 1182626739
 1920364094
 461225562
 1449173400
 1800536438
 869734715
 1722984905
 952558848
 1550364059
 67035834
 941086843
 498960471
 1441727673
 870051971
 2045918230
 1300905838
 1726278300
 1963592646
 939297338
 459852569
 576716656
 1521507520
 850431054
 780258376
 1873643946
 1752463816
 39863890
 297148971
 638478098
 1911191836
 1506062084
 1330142712
 1501279014
 225015197
 1232274944
 1274187577
 1006831044
 1397390887
 2139489133
 1438675387
 475835124
 1898794442
 1944594635
 1196820080
 2007976637
 223241940
 1909953225
 338481660
 1266647548
 2074951045
 132132494
 2111857158
 1481274908
 954093513
 887283211
 1375627625
 240934176
 1070494957
 1634897970
 17566491
 373598874
 1585429480
 671299561
 856313188
 2081401139
 1619345750
 422397501
 1161988119
 271027612
 1689500521
 150061027
 925389822
 211682789
 227493141
 1950952700
 1997487316
 1480813295
 1185371615
 1280897150
 730158097
 1950786789
 1210086787
 1403965862
 2043372247
 2052095917
 1877404180
 137259942
 403583407
 208740409
 1769324891
 1877862330
 686812823
 75935721
 1077072664
 986683576
 1119855730
 1629567463
 681322935
 243780718
 1186331946
 409145560
 1208505726
 1001905252
 391828480
 968626447
 281235046
 2064703912
 1215948837
 2021052755
 1110918178
 1410197793
 939562389
 47936604
 1272470207
 2005589744
 523679087
 1278128325
 1659497310
 1546534315
 1580676552
 227307785
 1270484701
 1256900229
 270657607
 1265171798
 1237564961
 111586666
 799969514
 1665600052
 918165120
 1577290591
 574325506
 1681467824
 502141080
 1356156762
 1255410684
 528471635
 1564567212
 1111342911
 94091444
 677860278
 1586584598
 2091205519
 145885150
 478112828
 145347100
 2076519292
 1385731745
 1431328603
 1491758555
 180851983
 391830377
 1888205590
 1516392550
 784759393
 1104939348
 550877429
 2071915286
 736107276
 274593187
 1757132648
 519968035
 1560213267
 260367937
 1063216876
 156319920
 1170491921
 615837949
 343081074
 433787833
 152682867
 1173753510
 415155024
 998711317
 884679584
 926759568
 758914156
 775436643
 1799742434
 1586076423
 1968310784
 239483863
 580774252
 1527579159
 1086950322
 58142810
 2140734926
 378747500
 950487485
 378233350
 43157758
 1566428552
 249092021
 301007490
 2016620614
 1132059099
 290770421
 457360093
 1934866462
 744359905
 612949987
 979933937
 1234069823
 1013133629
 84023130
 2125366874
 585618111
 351519611
 934669255
 95928371
 2071288673
 663424893
 1210664354
 1039137672
 1642570174
 1998732454
 34045425
 1232359849
 1680673566
 474341470
 1412279627
 1748245582
 1782471512
 1091629313
 1730386844
 193584046
 2042257789
 2045408166
 980909005
 1478477135
 556046354
 2115599031
 670824145
 1877386615
 1536980759
 170385519
 1371556344
 1789692857
 906749080
 372227817
 883790513
 1525923378
 262599901
 1688423642
 339795907
 1865254362
 740233246
 307864304
 149272572
 900247249
 532612190
 405761636
 750160290
 1207980059
 1879230790
 971477715
 52592790
 1270403313
 37212706
 85280808
 1676216221
 90996770
 1709479271
 223885266
 996390589
 1328415413
 318444064
 152875986
 58631780
 1524064376
 1889396313
 719733647
 611149414
 1875571650
 2107193959
 748725206
 349833707
 1678795784
 1879264080
 297771752
 1242320103
 737443785
 23047876
 1367599149
 58000583
 1377842845
 896006334
 1603625156
 545290386
 1146089800
 1684335729
 763800275
 1106308768
 1147840145
 301250711
 829777836
 1945122975
 146764363
 586896140
 1076471188
 2121662892
 869648054
 594028561
 1064638516
 250406600
 1511585963
 1773501050
 1342765774
 405671486
 1563743386
 519814064
 862295370
 1598038258
 1248724322
 389157506
 136430381
 782642424
 782054779
 820342993
 628158402
 510873595
 19452028
 724562562
 494541644
 1177073771
 154125911
 505066085
 2105577105
 1508228564
 1625266200
 1932060402
 516825320
 1902083209
 867161808
 1654493663
 780804600
 801001401
 1907647992
 308204669
 312385381
 1655642181
 1904774877
 565737631
 107512059
 1639465730
 1377835614
 2137112899
 2010786690
 944983385
 469374502
 825891445
 1448244901
 1266105329
 691742453
 2137424869
 293982206
 1921494779
 1877945971
 879620792
 1055663335
 1529687039
 472391382
 649975347
 2099705366
 1782998378
 194802716
 16764663
 906114994
 1651594378
 276759541
 860638843
 182805755
 1964370982
 1358984062
 1727269684
 342864705
 1460081188
 1819841048
 1187923243
 656545507
 744680881
 825129476
 201875910
 1429244977
 405989679
 2109940156
 2121974806
 420199855
 967479934
 768885969
 1976432696
 375634075
 565194780
 541106671
 1965432053
 1614062677
 548672092
 1353707108
 1085258654
 965243418
 1247025262
 829801130
 2019192084
 17237482
 1916095040
 1541640730
 540719928
 565979382
 2123788718
 24600289
 313127087
 1009771184
 1486808864
 1433275911
 1819132804
 363143164
 923506815
 2017276513
 1759026955
 549652650
 1245295576
 64814844
 379112226
 2024595393
 1846617350
 1300387198
 1460176882
 265561934
 1074482043
 459080245
 1222262664
 631040994
 1120462462
 1803725668
 1980158663
 1411273287
 383359444
 579110019
 755848433
 1374402408
 742854061
 1978303877
 118559866
 84283429
 981178267
 1768852569
 280946211
 1046554938
 1701997157
 1737475849
 1789182275
 30607795
 498232020
 1196124359
 862414263
 679740994
 80599905
 1214422991
 1977190671
 2105706728
 1357170339
 996241753
 1455809047
 370806816
 617303757
 741152242
 601903382
 487047460
 345488785
 1822004152
 146175647
 332139385
 443742877
 1667095157
 546994486
 1572291272
 1427203286
 442754816
 1888726558
 1835356673
 519817831
 1806450699
 313728615
 1030599200
 1453362103
 1595341078
 1934435474
 2124651399
 1402601178
 617551266
 1120536774
 336194826
 1396159310
 1362050637
 244431656
 1556459342
 2052755887
 1279945138
 841802591
 1876091732
 2024739701
 525772465
 1473210867
 24724898
 1266353745
 219261465
 1071231728
 61516909
 877425397
 407943902
 922368548
 1334644893
 447195287
 2056914161
 140279649
 1438276491
 1452465349
 1389663675
 966832525
 96528584
 1908866163
 125206484
 365320308
 219842034
 1015352418
 1040923154
 1469754031
 147502246
 1143479084
 1725143244
 1578704288
 2093716685
 1070868074
 629286714
 33072755
 1347944882
 2114554601
 664481362
 2126291924
 241016646
 651352813
 648316106
 1915822784
 789963335
 469373274
 1214555832
 853105801
 915735712
 898480437
 857710078
 546486111
 14428769
 326233361
 2023339197
 759837980
 2035560781
 914300895
 1867599676
 653314908
 1482416818
 1828521224
 2034727600
 16608784
 421847832
 1956437842
 1618857360
 1195586931
 1288494613
 516837624
 1820414583
 1755258878
 753398304
 1354018474
 29741424
 621968255
 1120493175
 549032817
 268097546
 1355370372
 1305933766
 857552364
 1362460505
 974757462
 311989832
 721772998
 2124488177
 2080264836
 330191285
 872225487
 1051984643
 1494111546
 1313169518
 615171632
 668217306
 2032374683
 461897660
 1140912974
 1427447704
 401398508
 1954369691
 24221723
 1768917284
 1366270809
 2483191
 1850596291
 2126246350
 212908525
 1965979770
 1807030181
 1636969705
 1090099872
 1570588658
 2027651682
 1166478149
 1780014608
 1479253587
 935331915
 688769031
 252004297
 47289000
 1549620982
 1954394811
 1841459318
 1229371933
 1918023175
 1822242060
 1082638417
 43101366
 348326138
 511791642
 1383681460
 763656249
 2054614668
 1881586349
 1674688331
 353985686
 387395392
 1450706958
 837083646
 1245353333
 25908075
 1563837715
 1463514773
 1295691816
 1234388665
 1053419351
 521763521
 35325994
 1128085431
 594014653
 1550499452
 68487644
 1353903087
 1387094901
 487043167
 43169247
 598539340
 1344024924
 674638249
 1943357590
 758220325
 2130296295
 1576519694
 1711312659
 1501490954
 63698048
 1650217499
 1464438016
 1620221794
 703672731
 1826388023
 141359234
 468729451
 638944779
 2087198909
 795839168
 998926921
 1394112024
 1123846737
 94819971
 1145205133
 1314881193
 805554443
 1154549621
 611492396
 831535887
 1576811454
 1094198497
 1884762895
 1503132988
 619560222
 516219453
 1732243362
 1284318180
 11990923
 1256729393
 1619356994
 1867704480
 1032423851
 526680614
 893704501
 959201370
 856321622
 63181992
 1664264724
 820823139
 2000506210
 1873020381
 1705474227
 930873345
 1653294408
 159192350
 59471232
 1001367973
 167411696
 18467556
 410119002
 97418643
 264227367
 1212463050
 2106685097
 1156936166
 1955050965
 836927791
 826787621
 656258530
 1482879096
 716310131
 1844119966
 450760396
 381686585
 684787291
 2038989341
 2117180126
 1759730423
 167144520
 789365769
 844826535
 1990284269
 1870461526
 196027721
 1928832669
 1895463886
 679403256
 1243992654
 249308213
 196579537
 837275855
 971879951
 826896477
 1370667106
 263193421
 727596759
 1852010385
 817479432
 579232599
 541417958
 1124992519
 813015466
 1470818569
 1675763950
 2054689654
 506903628
 1741680959
 1083065470
 923142036
 2074233084
 1149179256
 643005254
 1902676128
 712142586
 742072767
 922978064
 492837040
 1210174514
 1490971453
 1076927411
 1481093952
 731400731
 1123340953
 1085276313
 1221897806
 1992363977
 2133771887
 1350020973
 426866566
 726379113
 1299403108
 687077685
 1432398900
 2134819359
 958128287
 1282172326
 17388256
 1337578951
 1374191250
 835741116
 946053602
 1830439247
 1671610854
 471740440
 315100676
 738731644
 291617748
 1864231030
 1390301355
 419638752
 535229340
 97422006
 82353039
 1444851291
 65722224
 1705583876
 798050558
 1961367561
 1912528461
 1212453630
 1251294617
 1990546979
 1780164207
 513702842
 1592186257
 1971006039
 1209927952
 789570520
 405940796
 654478144
 1383205324
 1887691657
 1412862931
 392632107
 47054627
 627717737
 1398897073
 903825909
 1021008879
 1778956429
 1749860215
 1658380655
 1185112002
 1089089730
 1444214147
 1769375674
 1020084825
 298698302
 344055228
 288729567
 2060917126
 996243124
 1049246562
 1323761940
 515144729
 177921679
 1483768687
 76887399
 1166288968
 868891395
 239027462
 545146292
 194981541
 791405778
 1207060960
 1902018097
 1251382503
 1948674861
 1051439622
 1662887610
 1700501329
 1668997345
 528376527
 966340282
 1811173156
 1906039479
 1972710640
 2109263070
 469240465
 77221766
 335467499
 1668698602
 542317366
 1627280478
 702317964
 1873572023
 2142627624
 1978676056
 1389887285
 785257639
 1800763566
 566470973
 1578659294
 1887281187
 484595524
 1458091868
 1907549446
 1679734824
 1758571217
 1138777203
 1384821268
 2075078597
 109182031
 419347786
 774087036
 1535064102
 115544839
 553488743
 483405859
 1304115992
 135261814
 747826703
 1201743086
 1143594078
 1850835052
 895034286
 73060766
 39369814
 952532762
 1089884351
 2103681821
 1964615160
 1040620353
 894132229
 2061949098
 1964000458
 2120338238
 169011284
 688156187
 1333777539
 446426570
 993366121
 895899609
 1113363089
 4979900
 707180804
 45054404
 1734033820
 1216746308
 197331970
 1442717874
 2055844380
 1515039416
 46007153
 1108621709
 960092938
 1356819881
 450350793
 1276741814
 278505466
 1250571998
 160109489
 1056859995
 1108121780
 244574468
 102260142
 1153527695
 1390386395
 772992161
 1723842701
 1503314721
 1175149315
 648048503
 1991863270
 594464982
 1837118718
 2125421743
 1253201428
 1923999888
 1161523484
 85383028
 2125892420
 17874173
 365573792
 1389136337
 72361996
 39712303
 1182037491
 1246660349
 994746302
 1028951676
 874108136
 786273776
 1917576305
 1575678238
 1808661661
 1669018378
 37877354
 568407264
 260096793
 2013434699
 1844594510
 1487451488
 1699887531
 749833590
 758654516
 235120058
 1417274652
 634242666
 1086830270
 1695339767
 1076829095
 865561955
 1000136242
 234516025
 1484572280
 1742300809
 1915465337
 2145691431
 130426123
 416017858
 787772115
 117302320
 724211516
 647352860
 1195906481
 1287277823
 1178336627
 817074484
 693885268
 751909703
 592365951
 922235000
 1544394719
 525118540
 1596516624
 2046866338
 1853975067
 851160976
 1147768485
 1893544678
 1157208868
 1666660852
 1449881164
 687432340
 1551976570
 1870957451
 123372347
 1998703886
 404642656
 1650939388
 1158653877
 1093437910
 33736060
 1462530080
 909501502
 640484984
 1955408575
 771380238
 2020078807
 1919174042
 719200070
 1577455397
 651661753
 1888898845
 879216599
 1419112762
 87830168
 1331278145
 1153840993
 1538325860
 172084693
 526704368
 1143568443
 1647635511
 974715324
 1901736835
 1960443875
 1496124147
 2094519250
 64015282
 1852888117
 1884886406
 1783141494
 1105840301
 1435729153
 642610611
 485371401
 1755207718
 248480989
 1890751951
 580448264
 1101831171
 124780018
 1224934492
 1914806737
 2072433089
 1845956481
 813030273
 1970919435
 1953065302
 1522282322
 484873570
 1009991573
 1493691973
 245076170
 1742879535
 789785886
 64333769
 1371597668
 984399582
 1485788828
 1980712635
 1067297772
 1822707254
 283875981
 447576677
 1243414474
 543006804
 1236175304
 57051964
 97088124
 601638537
 1761642911
 2003805147
 137842485
 206159046
 987377921
 190457372
 48020318
 1447223370
 388807219
 212886867
 1773370794
 166720721
 345517100
 587967661
 1261563989
 1339694273
 1599428274
 799389791
 2033005207
 1655029696
 426565448
 2133589539
 1858700188
 2018368970
 1943721606
 208497972
 1393615241
 1397786205
 661351208
 1849935392
 1459970630
 107585236
 1643443130
 837309130
 409471165
 1864793729
 1228669301
 203746844
 240494844
 983806555
 530658203
 240872275
 1022053291
 423322140
 845464732
 1175921865
 141341583
 761564337
 1754629300
 308147149
 261527760
 2079254964
 22441123
 1271170019
 297851351
 1991988080
 1942952498
 1133623125
 1188837629
 1533180980
 853749935
 1113233559
 1677552613
 784680752
 1171382021
 1435472803
 104997908
 463170284
 923576093
 758174769
 1400443704
 838637896
 1846250421
 1617397552
 2035741479
 1580895393
 718705961
 107390682
 1800032637
 296651106
 1940178559
 629216046
 2022216313
 1869148250
 1744280113
 617225993
 833881366
 371099455
 1868003810
 843647355
 178873071
 699767143
 1852922989
 1496362658
 626594338
 94801993
 705304103
 1350056788
 1032004150
 1954179325
 1672612944
 555563575
 725975
 1541500140
 1708663984
 1175492920
 2076842446
 1373083247
 2043039051
 759126134
 1699262756
 159051316
 358627366
 1432895076
 617570651
 1808227742
 1399226568
 661793153
 1810763063
 1639581499
 632762204
 150962021
 581540747
 310059995
 1283214661
 1875396963
 1159484228
 1122614525
 1628728320
 1485820720
 1260576226
 253607851
 142718550
 1050290016
 968949710
 675246485
 415391133
 222817890
 90833240
 1850324736
 1968086060
 257539192
 632118828
 1525406097
 451859177
 1016387751
 1675432303
 1128335286
 978432817
 749296017
 252458181
 144194669
 1827956343
 1104787675
 582850200
 1142356074
 1823531458
 1177373984
 401840826
 1973149983
 2133565434
 625719159
 1173314873
 1508777411
 1036794293
 2087270631
 1540518705
 1094919182
 909737734
 464261379
 452116827
 750373828
 1695892258
 1349203532
 1569118610
 1565533117
 2117258863
 50861869
 2007578665
 878989248
 855712824
 637185208
 1311876993
 381718939
 1581835106
 1556642503
 1277238826
 5705212
 986578330
 411473650
 1206040859
 1298944053
 1691763963
 2007818789
 1348666937
 163782958
 508801003
 227147324
 1311862282
 153665181
 1001506369
 623521877
 943468475
 560336099
 161247192
 410586762
 1391060522
 2029769409
 478116879
 1251376284
 437246111
 1352087778
 1772828434
 1223538877
 1541485825
 1208028247
 1158375465
 1658861509
 739978185
 654935428
 893449754
 860756449
 327371016
 1241322754
 2056417671
 682903962
 1816088668
 1808252247
 1416509758
 1630120186
 1350882752
 1474584439
 1560296047
 1236508424
 1876270073
 155062608
 1701600167
 1017453666
 66648268
 1620838570
 53119587
 1277883246
 114344289
 1193238206
 1411785320
 580931079
 317244886
 649119687
 1262535771
 1121367566
 1834507076
 957414673
 1212524834
 2118012491
 782750202
 1352262231
 840502972
 148612040
 163667687
 953591337
 207135012
 527427555
 1075129049
 1769041539
 1633678450
 48062592
 707186110
 875321423
 313555693
 705017328
 875938181
 386187491
 1303109451
 1282526493
 1655803971
 2022525321
 1890218329
 256125621
 1870309460
 1820476561
 1128434984
 1262492158
 1226388694
 1683254521
 1639209357
 181945080
 1557403485
 1578786198
 717403853
 800193156
 1417428264
 147537375
 1577823220
 362931103
 927400865
 1229536073
 1440431216
 43393599
 535765720
 2022162545
 626837088
 2024048837
 1308631227
 1422340270
 1874692854
 974986947
 585027870
 257837106
 1163802219
 148240609
 58507453
 99007068
 1654699300
 1737776453
 593455434
 1909258486
 1880143366
 1895329150
 824101012
 821128263
 1855397581
 1023365605
 1581279047
 1874767718
 847155582
 1165475563
 2006808780
 1139492224
 664338598
 878100079
 1423483711
 868755693
 292110936
 1210376327
 761626398
 637800634
 1674733216
 664484758
 1190698494
 1240425731
 1808554604
 720264488
 995962836
 106167380
 1932200129
 1122889457
 623578586
 249134751
 388623082
 468586546
 1744156383
 2071073543
 1452849624
 190071368
 2105051924
 1258611048
 1605905294
 2057969792
 177785324
 1925841833
 924254744
 138332041
 137640261
 538202462
 2117034271
 1094803585
 1122785386
 796811634
 2130448336
 1935351981
 1820666054
 277440953
 702388200
 398505531
 1688074322
 1010109665
 1428098124
 1634252918
 625786416
 862551691
 1092598383
 41437853
 1959578902
 1605313963
 374009182
 858818842
 537532845
 183147863
 666066661
 1480855077
 1461669237
 788202633
 780118177
 500005786
 1642358929
 1992078717
 1180316832
 877112019
 1121634264
 92544215
 1017198866
 467283118
 443819985
 847607198
 647686999
 1315223722
 487234828
 111838942
 1770402560
 1868831544
 1497746367
 923940998
 1273020788
 474705476
 324305550
 501825142
 2109343463
 887612290
 500531941
 872920892
 2056493692
 24341289
 868559175
 2030759899
 1889962608
 1725869698
 1639518619
 596010076
 1986018952
 38542710
 1962327010
 307498016
 347074248
 1490493297
 269842935
 1054270859
 1767394593
 1904074665
 1156311053
 431536048
 1020818525
 991815293
 1528377921
 753840725
 1415392883
 711289802
 1315733516
 340102933
 947584425
 449924906
 1619096826
 1087263585
 2024445261
 449981275
 1712094916
 1278730313
 510577098
 278796837
 1086944894
 1960629646
 775614459
 1084888135
 1033668164
 2069198090
 1622849038
 1528535393
 1151858901
 413167242
 231356070
 803608146
 1369041158
 1766537430
 2076339349
 616413352
 191649359
 1790404306
 498260644
 106657635
 2014122326
 500101117
 1166644405
 384725347
 146521070
 1061783490
 2128425528
 2099891922
 1673604176
 224269701
 1026302415
 748688372
 1909378981
 1990077513
 1274912370
 1003068291
 2136159701
 843099534
 868432246
 890665907
 1947324749
 1173022292
 196483315
 820419066
 1085547890
 531844818
 1148434934
 1252412845
 1875042491
 856165802
 1585342765
 1947538660
 747028569
 237748628
 1990101088
 145125798
 1105267204
 1918620463
 1043777406
 1044614354
 177346656
 1497809436
 1393894385
 51222440
 707681722
 620414683
 1157623535
 1053494466
 1410055637
 1478911324
 1355549179
 711690056
 2124664948
 792256564
 1542669177
 988854073
 1543084943
 2087717922
 1505542317
 90691186
 1325293897
 1772574408
 1313485291
 1830131911
 1936571517
 1100566192
 452610018
 389889255
 537208405
 1733622481
 508610524
 2008913669
 980512538
 242357056
 951690981
 596999612
 1471805682
 17659324
 1954917691
 1226411762
 166378951
 135418899
 571310526
 1294322141
 646566000
 1886839880
 58329057
 1045706410
 463490754
 245681683
 171924916
 347242709
 1231172136
 365981377
 505972151
 1266131066
 1617401081
 1564918503
 1118962038
 986043176
 2109816354
 899088067
 1391766601
 984058253
 73666647
 1036851968
 297454840
 21118203
 1963293444
 1836978874
 1727383324
 1797466011
 1720160095
 1160458439
 1880207323
 1990282110
 1870648421
 1561398829
 357223285
 446453660
 222154777
 391087212
 81749465
 348406169
 827796387
 2034077111
 1916896495
 2084497151
 1779032429
 382773983
 390078788
 1294350234
 304028379
 236179911
 1485710324
 1820938223
 15409331
 1420502402
 1838570745
 950250948
 1152307805
 560194039
 1027445087
 474918010
 1190989104
 526240942
 1415188540
 1943843582
 1280330486
 1290502493
 1828182482
 312335
 962521754
 1168497461
 1965281148
 1702533878
 1175407635
 1382677527
 307216389
 1594610657
 2108066175
 367198709
 458657303
 964199784
 637139124
 1320656123
 933834763
 794862763
 705751676
 554300025
 686010849
 382818044
 1329407860
 492310398
 1733204371
 78582952
 1766150563
 115864887
 244089541
 711157805
 1899383991
 594864649
 1781673919
 1376191609
 988268100
 511605870
 501502534
 1155971363
 1765112119
 77825341
 1905246023
 484888132
 2022976640
 645707073
 102839981
 43417566
 198334814
 647135264
 13009039
 1555459085
 1129409035
 1905400794
 1058701812
 169029257
 1379400948
 2082943793
 1688568545
 1658448261
 418649755
 199702770
 403746484
 1668756001
 336803021
 8538566
 1707436594
 557908038
 1143371590
 1517464927
 960469320
 1719334021
 427279106
 1012691110
 1119142851
 1745657207
 2041151952
 882385204
 617414152
 1370536223
 1727619177
 476843739
 1002846580
 77470267
 1276640502
 410400093
 1153671510
 718687199
 863474364
 1136928056
 1066316710
 927167905
 247230554
 407563680
 1717511724
 2077340684
 100670834
 710258834
 452672960
 385149531
 136159640
 1489298831
 958544174
 2007427305
 1640103209
 398016008
 207586598
 108296083
 759192347
 1047992362
 1908626535
 1344210041
 579106563
 1590797937
 1952378029
 388706425
 914735627
 1365046573
 46840688
 149346190
 607204609
 1366587532
 1045474203
 546221597
 266225169
 758776483
 2095344600
 1487167828
 836106778
 113499521
 1976130633
 718461185
 33887628
 925049806
 196575287
 135866558
 1679248487
 1412072641
 2004345994
 597067262
 2020114932
 1238263052
 1893967657
 1482430905
 1029044415
 1150825062
 1956534134
 2106291781
 542058596
 1470622568
 1446598691
 1695383234
 53218000
 1857390579
 367928962
 679256260
 1814804385
 334512084
 724194699
 1979766514
 81002235
 1442600501
 1942466052
 242339793
 477855292
 613005312
 482270524
 352743523
 1421887540
 1620965944
 1425997343
 1510671693
 967959240
 214212566
 110844441
 185548935
 412446281
 527792872
 1620552913
 359834401
 1210083409
 129221472
 1081925925
 1634306648
 1987784030
 246200849
 1424418453
 2033727893
 755716730
 1055976524
 1243314039
 59012210
 909050502
 994876006
 1761448886
 899415023
 637866925
 1626091140
 690508386
 1642662136
 426855072
 667432680
 2000401976
 1753793006
 1130633894
 1057083189
 2045802317
 179692792
 52457275
 1813018679
 130214103
 1184425871
 976821080
 2044654379
 750449979
 1181136086
 1708958183
 72898889
 1071686819
 1186078758
 924454785
 1948294921
 1352101424
 1801507656
 2057803274
 784663707
 2044352226
 209275547
 624149878
 165922723
 852527860
 1749955513
 1335024425
 388319176
 182224075
 1555870437
 2115312004
 276612473
 92819647
 1072898656
 342096097
 744874746
 1975650276
 1090031783
 577617632
 303302270
 1083134113
 1623648718
 1826133735
 570915866
 1482854695
 2122281177
 335638578
 2001196596
 1675782516
 299251164
 811676569
 432424247
 2020238641
 497973297
 516947719
 1102167996
 781986175
 1854541816
 126183455
 2080915220
 716737767
 1352172917
 373896731
 841645035
 1263414572
 1203325533
 455987040
 2116950469
 254457469
 2004748011
 810039755
 184665034
 999944258
 142987330
 1415196245
 1214563952
 845536057
 1154760194
 1385293552
 534082661
 2129728916
 1842620169
 857977490
 412781929
 381147128
 170964895
 190005375
 651786780
 425125868
 1579088128
 2019401360
 1827960001
 853165316
 635169480
 874626439
 248116614
 2117704510
 184347365
 1158498814
 827603216
 1876624496
 1746360804
 24267558
 1595893576
 1076260993
 1601569092
 1039419498
 174183835
 2006232203
 670387463
 583934890
 1118219449
 64422597
 2060047917
 566772810
 613873584
 2123275958
 528205238
 190917649
 605171766
 1441290934
 906710887
 307157087
 1706325038
 297525559
 414334583
 2086199870
 1034484963
 1522379821
 1253975978
 282060263
 756577727
 989774221
 1428401869
 570411820
 1862656661
 340274853
 1921932866
 504487651
 926681069
 762648362
 1277174663
 266526753
 318799995
 1969463652
 1718907606
 49446810
 1487970347
 202521912
 1287609065
 1931955008
 1264564911
 1072398785
 1892977282
 1822451783
 210220414
 422295185
 231114829
 797674045
 1635100925
 1295324934
 39516600
 1098028924
 604656300
 691217631
 1262317825
 297364275
 1560419344
 168084017
 1538825345
 119359869
 1430827637
 2142855377
 1387728254
 407910104
 1059142266
 1315870023
 1869332348
 841208007
 1094253958
 398443451
 226356477
 51571755
 1977100984
 1156362024
 1401173566
 1886259084
 1798483785
 1858791949
 53397659
 970459124
 575474165
 481850567
 975806556
 2005603559
 1705819568
 151659000
 627231890
 228630300
 870339719
 1315051697
 913817775
 1555986810
 2127582746
 32901424
 591131318
 993735297
 1455366262
 719640393
 1964404640
 1404556787
 976317260
 1582218773
 119737370
 638517597
 1948930178
 658502275
 1251967324
 118769263
 1199147655
 1713450749
 195947544
 2083816561
 1935248720
 311704879
 602845210
 49469097
 1459184954
 317634616
 1195150464
 1321047879
 1894157597
 2068438590
 981874921
 918898800
 1532510533
 1287007935
 1361463468
 81146055
 300315926
 1213510014
 110927632
 503411589
 820846168
 913688763
 558216069
 947435213
 309753263
 1766553769
 1842850195
 2112136301
 498671461
 1454832194
 866141932
 1754653832
 183420256
 1631395568
 1063526343
 490633817
 1287432645
 1843508936
 2106159145
 2007260582
 224028100
 343066864
 2105629757
 1301816498
 1977091695
 1320817284
 677979102
 781329558
 1800600277
 303757155
 272210311
 598969839
 1889018256
 1270576950
 1202620787
 232450530
 1781721614
 833716005
 578785123
 2085090825
 103369428
 1606600693
 1391965901
 944416704
 618365702
 1004855831
 1173606624
 1682988879
 766877422
 72652931
 1778037751
 363879706
 1635175800
 1542740481
 1038296296
 43732355
 1847300259
 1499088849
 470426671
 460400903
 1651485508
 521614157
 925577894
 2061713367
 1846347228
 1642504969
 1652647568
 183885039
 1651853074
 256799263
 1055601721
 692347189
 754553517
 243338720
 1571404416
 1328416679
 1552900012
 1359101498
 883459176
 1185455204
 690961622
 526296882
 714620209
 799117786
 395421159
 503912
 1269835172
 1812648458
 1634023192
 832516400
 2076695159
 1925692239
 254306521
 393077528
 1104083669
 1984869223
 1115636390
 866233827
 1556883549
 130471482
 1506377177
 1713188246
 742873556
 1551915209
 707363874
 317843107
 1787358837
 1344235506
 629589328
 2138976313
 1887836934
 555223097
 1245663111
 48754783
 1171155218
 137686687
 715986200
 394205563
 1532858616
 1869394496
 961102515
 192857763
 2067587650
 177077372
 951783529
 416481605
 66216386
 1857203857
 1548665564
 1849203814
 1810186623
 1481311241
 1389794203
 1585401954
 819703752
 17508031
 706862964
 418741834
 1778164170
 10337925
 1680731926
 1350756310
 1952040195
 1079658102
 110006584
 817179628
 969235458
 533960209
 387584599
 696696671
 1959288150
 2060524790
 674147761
 1799737131
 404962750
 1676434976
 2018419956
 914315945
 186553366
 851291546
 1790458529
 30871779
 659291438
 1959311207
 1860157688
 194823230
 199491393
 1021199551
 775172891
 188344115
 1270810639
 1459026141
 318551130
 1001900909
 1690765880
 1196602079
 1892029894
 1117482598
 873839800
 1821180166
 131068185
 107447021
 761736246
 2023669228
 1827227629
 1467813546
 96750241
 1348516818
 1859524497
 574864595
 1807275967
 134577717
 2128773194
 911603132
 2143152093
 1529212174
 1493677936
 1957644496
 673473180
 988572885
 1908411346
 1771809331
 1674207322
 2024821821
 264368779
 1611220073
 1384381033
 750027994
 2026219410
 911030173
 1725198460
 1245469811
 1052314703
 440769960
 2122089127
 405872000
 1956451329
 1874943843
 252505569
 1139378244
 1801341455
 2137562476
 751988135
 1391766105
 1999631404
 5942233
 218341957
 956725778
 664455574
 1642522803
 883928936
 694104166
 1433409425
 1501164246
 1064096250
 29407200
 1740355079
 604791577
 865817285
 55128740
 1092471921
 2145747075
 1810348329
 172938754
 1418514869
 509523410
 297801076
 691876780
 1847993137
 2107833123
 1406897889
 1449574986
 1502994620
 1125505123
 31111825
 2974770
 1408671948
 581926407
 1767924706
 1124461198
 372542808
 348973730
 966386301
 1675649994
 1721880147
 111956602
 1053267637
 1981975279
 176094125
 411742194
 362195714
 1507964163
 704144229
 1209394196
 2103459101
 208273878
 407117357
 974362276
 152724205
 1083870517
 1628550313
 1251951927
 854482871
 1245288290
 1464735448
 2141583820
 61304897
 868335523
 1980424006
 1887323453
 1966556094
 1035256854
 702879788
 867437969
 949482962
 320850509
 891575870
 981785336
 91019975
 1044191622
 1981589800
 483709278
 1787394291
 536802573
 1036023974
 342873300
 1176327666
 1123033419
 386754687
 1322764481
 654740866
 384468874
 1892251689
 752711918
 1097437904
 461722546
 1279257514
 1852055013
 1556335474
 346836441
 358879515
 1477787942
 836847468
 1846481368
 867111786
 1414405857
 1307004289
 271467719
 1077611628
 179232150
 99673073
 1353087029
 1368760507
 1153970275
 553288569
 1935049020
 2058205123
 785347636
 589559532
 1351378017
 1730607355
 676913730
 1594182664
 1414658437
 1524497386
 572976064
 94393040
 215124447
 433747969
 425279863
 230457722
 340364853
 515738982
 1934357282
 190587610
 1527198387
 1958407612
 1544432100
 346774404
 864232188
 2052948823
 905497344
 17510525
 1623790449
 220114477
 1716779357
 950468256
 696146045
 843217500
 1468200833
 167645846
 1986980610
 1742358565
 1000477322
 1017776930
 118315012
 265761247
 1224910143
 281380196
 1941243664
 593430522
 1603854319
 782414168
 116761691
 1697356244
 863865596
 1433186689
 504363924
 95137520
 479099415
 288877334
 96234082
 512427722
 80510233
 2078831304
 1164610013
 941716404
 525419439
 999590424
 1017165756
 513265793
 444156430
 791911743
 141736706
 1657014913
 1560354936
 878412755
 1129912037
 380797198
 1593745011
 357542766
 460941238
 246294424
 1902229062
 1871801037
 1919820263
 1029815606
 566019011
 877598465
 921550597
 1740110983
 69955193
 1202594993
 788143377
 872128141
 639850297
 941824660
 501482874
 1876965937
 897348852
 1381511404
 546784188
 692208774
 1818610450
 1563959376
 491626161
 798536682
 660743110
 1606763363
 2099663722
 1560037293
 276741038
 829152383
 1580214597
 83951621
 339613304
 2146131613
 938020934
 288794229
 290718299
 1990641777
 224312313
 1059591772
 1361743148
 1131087403
 366866562
 1852978333
 1084702585
 1278800636
 891827362
 1785052545
 394059330
 537654998
 2075989257
 1232956766
 1197744699
 1985304577
 1139375174
 781715088
 1626336113
 705705115
 1213319723
 156192671
 480831502
 1204388709
 1579602854
 1595883074
 220423427
 1727166918
 1797890254
 1990023253
 525598768
 528578113
 1761203560
 697156154
 1966089884
 681091114
 281605448
 1894463661
 674102110
 1889796279
 799069395
 1932879157
 699793614
 1627002749
 2122522217
 152117753
 476782371
 377473796
 1032285816
 1175631098
 2020927445
 1760061697
 1683954731
 123006033
 534448319
 506087460
 335811412
 1942128816
 663804607
 28602373
 653144641
 881588685
 1695572056
 635350201
 1633986876
 990370629
 1641222240
 639613011
 1587637325
 1349951366
 437761678
 1523196101
 199356592
 1179034090
 1314886620
 1210276554
 197955702
 486634450
 396800774
 2008078106
 1057200179
 698130144
 720136948
 1853758869
 501083375
 751802931
 517996596
 258517803
 780423018
 1039012301
 266433820
 1786079688
 619431669
 2057065074
 1036084903
 1949591933
 1721754313
 363742370
 187256197
 565295803
 1064212611
 697144435
 1093937217
 1575792695
 1937219645
 2062241097
 2037151101
 1499391970
 1075035706
 660995908
 783685607
 951231185
 814851289
 1894173754
 691805509
 1268246708
 1549832293
 1760259590
 1990473757
 1230126118
 280776304
 1423395583
 583217455
 2141802683
 1541284139
 1919423444
 867654102
 1794235706
 1034098717
 1546763175
 15097755
 1971536787
 299517703
 701930987
 365594784
 1547703822
 1953008824
 2023196783
 92252140
 1513336213
 751958387
 1349530448
 560256852
 788535885
 635530001
 1222256041
 1235111360
 1438601728
 1060772042
 1034941935
 1863919623
 410827145
 1840186883
 1760511252
 1415491791
 665676405
 730199443
 24977697
 1675374181
 65537017
 1166349476
 802962366
 770163253
 1114150485
 662132079
 1291627460
 1977803790
 549872443
 2022338425
 1491403472
 1910307345
 2022234934
 1075520269
 157601975
 1246090149
 1364681592
 750267837
 1567646689
 5912228
 108150000
 1032985992
 99272454
 420265431
 2037099314
 314095151
 1958441863
 1948711629
 1859702321
 2043794096
 289457004
 1074027961
 416738583
 1172519716
 834048607
 442214916
 97114225
 1093869187
 792322862
 1632862258
 952136837
 1239341446
 1199210222
 32190977
 749080491
 630943088
 1501699207
 1677226011
 1522763651
 684965400
 139944613
 352239535
 224733908
 1470755551
 2105157133
 565606668
 1417302992
 1553483196
 617254181
 823854646
 1853931484
 850986464
 1159547067
 810894981
 1786305628
 811793826
 1678858
 1829750251
 193995710
 1705873114
 1672934049
 1210336919
 324663882
 171460155
 855139825
 1300388631
 780532947
 965051469
 403716461
 502431865
 1270607752
 843957179
 1000328585
 744202621
 265663751
 1388633971
 1490813218
 1542177866
 134476509
 1868530745
 589989573
 191479800
 962432603
 391792444
 1328584
 1248515386
 910335207
 33448039
 1956715879
 1649992252
 1215122959
 342057280
 507499405
 1313589416
 181910321
 319688873
 459680230
 644647008
 1468574857
 163857845
 832406522
 145911511
 1938802103
 372423768
 419772623
 1639048156
 593501555
 754362180
 146342901
 1967248208
 1245457687
 690798335
 1557387329
 2101517193
 421117043
 294022351
 13616265
 1492639384
 1610273249
 1674028690
 950400595
 1198833453
 257841479
 1224554852
 1110919572
 2113368461
 1762459164
 758204375
 1339164007
 1096553685
 732986958
 505356807
 1368719203
 790150771
 105781885
 559394933
 1986744373
 326222218
 1922638690
 1137351796
 749574429
 478897404
 1494350290
 2005587751
 828742675
 1362888408
 1955931742
 2025194491
 724898885
 273400655
 125847460
 105736373
 1780053291
 2082363280
 1414726287
 2101219488
 540613009
 1529621478
 1581210770
 576910667
 1453806158
 315058120
 1729448508
 419002901
 1809545362
 1067942761
 257035713
 191505287
 1417130695
 82441127
 1567017475
 85540858
 131507645
 1605148846
 2037763971
 1026202405
 31924109
 2052192453
 378621075
 235614899
 1526102962
 1729453367
 856543475
 1282564598
 1735919258
 994386200
 833991984
 829206930
 1667025670
 1779275541
 170082749
 719560498
 1362516197
 1296256098
 1906825594
 635705675
 1206316943
 1734391805
 1200331412
 1274829499
 1123602937
 1820809051
 183572805
 1185460003
 337663789
 374272052
 1616639788
 1192050079
 898551407
 981665507
 1548552213
 1802985656
 810124884
 267243939
 444942227
 1434220853
 278265816
 1276915969
 1843975213
 248855454
 1287908039
 364204560
 1594173053
 1678578449
 283187901
 602110535
 1016705234
 166283082
 347317703
 1948440335
 232736321
 1082536972
 2048937830
 1033190835
 491712070
 123600753
 2070303167
 1816105185
 1298566465
 2048177625
 192638881
 211332403
 760469936
 1073535656
 1283159250
 1803578553
 2111807820
 626144178
 631562868
 1962049086
 1452495239
 962655429
 1879475133
 1751762193
 1853972621
 1862779636
 831882789
 1659905540
 883340220
 1560639639
 2129752428
 1788406836
 616158451
 964198597
 1118202138
 2098623593
 885810756
 511359470
 453206537
 1462571429
 1524569550
 1244804102
 666973360
 674972061
 1569777548
 732207183
 423615809
 1959655184
 1038500039
 1229770019
 1097783275
 335630799
 1942341625
 1506428046
 1588457498
 275321107
 1909558763
 586876403
 1951775525
 450617950
 1756467928
 2007761738
 1801470901
 1011779587
 1901629324
 400046542
 250348462
 248219252
 663475569
 209491364
 202428695
 2114245800
 1472663697
 822243374
 943941683
 817070783
 1812149106
 1835541125
 675751298
 975804631
 683688543
 81261412
 502479602
 1988553474
 1190000375
 154262035
 872425248
 501544634
 56719986
 1485181431
 583144643
 1680240863
 936167111
 2067586774
 1743218420
 495345851
 1744613712
 14846273
 1196512352
 664997306
 17254821
 2053171102
 327320507
 1139979852
 1762739859
 1385502918
 1529634021
 728333310
 1402095529
 860064242
 262412353
 42946486
 1252877837
 1761332593
 412253730
 1407987622
 1324439267
 1684131997
 1697677828
 979624058
 1354382233
 1310102336
 180428048
 764882464
 30511015
 1287187631
 1881621106
 2108262497
 299393741
 199883170
 1166518893
 1806692841
 1618567168
 767667521
 264624705
 1851961236
 971556599
 1205764788
 1274022026
 862778138
 1760633964
 1020699657
 1751634178
 892547976
 1703162429
 840958246
 1820900213
 1914843364
 1377838626
 779259760
 566240792
 1861091737
 1543066373
 752907093
 985745239
 1077411461
 290476524
 531826301
 563988351
 202249074
 111128568
 2054000734
 742170385
 1406438467
 976827335
 604668921
 1496445027
 421947346
 779065661
 1880547428
 1555271922
 1685316187
 1406691814
 201360713
 779441601
 94470298
 1865068163
 667683666
 258599997
 68924587
 938570466
 780573097
 223399910
 49149111
 728131594
 1440001958
 2009723352
 1767008448
 548304290
 454025404
 795258046
 1479422543
 1625695099
 110151577
 2132814502
 621367280
 1247753563
 1791465509
 1014431332
 2005248405
 2099276861
 755495066
 112560023
 1180446845
 1301274628
 1040725134
 89103492
 1408762237
 1151673861
 1162886832
 1172292125
 447420672
 75576226
 1750602839
 1116690030
 185488042
 1664115487
 376658797
 1906819880
 1550446896
 1010885476
 494099173
 8263834
 832358384
 2067461334
 1240978220
 1043105167
 1577999359
 129331728
 807612899
 1304880643
 1616031664
 205601130
 1831828506
 2035983487
 13361301
 1119584078
 1826777100
 1294818751
 666681561
 2101312276
 700745769
 1570568998
 130817466
 669214964
 1442294749
 1906470409
 639945102
 497158847
 1549075396
 1825790708
 2012577607
 548017130
 349681989
 325793775
 1098306211
 116420801
 908098172
 2137630397
 1031484767
 2019934239
 1268608655
 1821729214
 2043466978
 1678400409
 415971909
 1907522358
 464037598
 1711330375
 257013755
 843383196
 1221670450
 859611496
 872093929
 1919722795
 582720335
 964341874
 977097541
 987052461
 1906275596
 679763407
 857606185
 1857163333
 873244486
 2027535489
 241162390
 991483247
 1987826161
 1729807963
 1463982152
 1100234325
 932491998
 1069884950
 206889212
 395372430
 240136727
 215878035
 1853287969
 1878062738
 1732346723
 1329307812
 1377412534
 496444894
 1629782788
 1903029208
 703671738
 1105875544
 2127461256
 714182385
 1890526123
 2060775090
 193325136
 724984932
 829712145
 384018527
 336577596
 1789067891
 1446277222
 84472439
 15218185
 1837131185
 334768905
 961450090
 95021457
 463121807
 26928524
 784731098
 1025658861
 964301778
 1494885157
 1731379813
 1497002166
 538190356
 2089157838
 1870694246
 1172620659
 55570388
 632276702
 1869855969
 381796989
 902567695
 1758787955
 38059596
 581518957
 653187463
 770649091
 1647621482
 115064008
 840313372
 577606207
 1326182311
 714314713
 1279635089
 1272515270
 507347119
 443808508
 86928657
 1085040790
 1446737491
 1619053529
 182879798
 403788163
 437188553
 2073139513
 2029425142
 352409459
 8938245
 731274547
 170719758
 461857162
 463456410
 337615059
 1168626603
 71393009
 426139921
 1009185928
 1453579242
 1407282077
 859698228
 1491714205
 118533204
 61148603
 350896326
 1101467426
 1606810933
 903991143
 1162531709
 1740528631
 309951026
 1102548354
 236151912
 1891554886
 136057461
 1843631384
 1608631508
 155115839
 772619758
 1236224929
 374517659
 451341522
 408545663
 634324835
 1458845071
 1725522743
 2039201439
 841341129
 195916997
 576911269
 358250377
 1704731418
 1039715967
 1459480636
 170213448
 18698322
 1412193866
 1957599852
 808184964
 979445821
 2140688518
 276891944
 476218255
 1732401036
 560113897
 1373054521
 1462577242
 1761246432
 1665935353
 1966236977
 843695227
 746406503
 987021256
 288248680
 594671747
 842305336
 1041063704
 211195955
 586307794
 1363732719
 1966217725
 936297595
 1045001586
 492226496
 1575677616
 1931592989
 83843003
 360566136
 902889022
 957073
 40217462
 1399557064
 2043473587
 1033326002
 1830452975
 1588128598
 2007556977
 1433310001
 1224037460
 850674189
 537995138
 77873355
 1902720358
 342374107
 156249680
 1451404974
 746556732
 779326682
 565267422
 684838704
 740384241
 1620581716
 1284569816
 872078648
 1983037968
 1846511113
 1412807935
 1711034981
 1681456249
 1459883737
 1709375749
 1637272065
 1554274661
 23206210
 488332368
 514075515
 1291564654
 1429420204
 1328427601
 1758554723
 946224030
 1764213168
 1094597156
 908127281
 971598168
 729662813
 1981074875
 1159236422
 2131747546
 245820662
 994161507
 1926181555
 1027766149
 2038958788
 2146967431
 1004419581
 225571766
 188647299
 942902068
 1602675430
 890789869
 891647642
 2116160285
 414290967
 948278871
 1610799004
 400469597
 552880933
 24833334
 490725160
 1292841114
 362984277
 204567817
 914630427
 541884141
 14882364
 1831799853
 1545512805
 1512573541
 1503735562
 5182409
 12777122
 136154946
 218676340
 1479564818
 1866821766
 1323418508
 1812367807
 1461542573
 1374176803
 1083801252
 759475574
 712663162
 1342919340
 1791885814
 945982839
 1421904412
 20407206
 1092042745
 1752411223
 1469338903
 1018590447
 1986353709
 1403150511
 473029450
 162566762
 2555821
 343122201
 126714029
 1515804756
 940033721
 1949864901
 678207329
 951114569
 692776704
 1508271515
 1028399798
 1058204354
 304112238
 748113683
 1725972340
 490404020
 129929597
 1952699724
 1306523047
 494286515
 1184455210
 98947317
 872579516
 1610230863
 1023859598
 44154513
 971379586
 1960618036
 1678565725
 1796647847
 1631276979
 1446365455
 2089753921
 399596186
 1040085253
 993684844
 1903376933
 1822366656
 112574720
 1906123515
 1363269590
 122960104
 1734889871
 2145136566
 1428594374
 746820146
 844911877
 575617362
 424129652
 182576966
 1178122844
 1073225260
 440371286
 434116550
 1208558363
 1803109890
 1009284065
 1753901324
 473369489
 930814909
 355752242
 852809777
 194174349
 559235771
 376902467
 394829223
 389288385
 1028472674
 1478772705
 772661455
 972853956
 2013242701
 639953037
 1138134640
 1379307276
 243953988
 1267076307
 69429189
 1257136211
 626421278
 1344703692
 1831466772
 1234787536
 975311150
 1595481583
 743729831
 1820813560
 243161124
 1929095560
 497923830
 948722641
 199084776
 2100947039
 812621159
 1953760394
 1531451522
 2108559338
 1226393265
 1539509076
 340517016
 1636473697
 174685462
 1256021795
 515417551
 1768136087
 606292284
 868207347
 208931773
 1706666191
 82900565
 582579992
 1348252182
 126590169
 1624102236
 432005696
 1424291396
 1568986417
 2027786746
 1084711481
 944467255
 831595207
 600604536
 930979881
 466038489
 639558652
 1393538462
 1339846088
 1562774371
 1944954216
 1173905152
 799426885
 675353290
 1379367250
 2054468556
 1480182742
 633243920
 494237572
 1534266471
 893795731
 1779507283
 1034172709
 976278148
 228258720
 545708099
 479007501
 456946520
 373127696
 1544606969
 891431284
 148199468
 582984407
 375111663
 59361528
 829971856
 1719532593
 1075331480
 1138171987
 1596836579
 1069043219
 971433103
 1668652825
 957968074
 1755124041
 1852264242
 176299437
 1782341046
 1593004356
 1658598358
 836025682
 199630946
 1534075293
 1535698538
 337915457
 243567495
 638432275
 882979372
 1185373180
 1750578583
 1074008921
 926835565
 151842485
 767336995
 2080592143
 2139881042
 418034168
 1157297067
 1433995317
 1670443860
 605265362
 664668196
 1378971074
 819138127
 1510877288
 97751884
 315183467
 433520833
 1257073949
 6876865
 1304304989
 1988126915
 1853618219
 2107028264
 243121118
 787871318
 143703291
 1451590691
 781304572
 163438572
 1151334051
 1243913289
 1416146059
 1554286484
 950454860
 1779178606
 5334098
 349525619
 464020522
 2117627028
 1517353277
 123267352
 858889042
 622613116
 661692768
 1766983752
 1733138354
 790358107
 221689211
 285336657
 1350120472
 21251812
 2005880842
 79302045
 1034169631
 402469665
 1545142733
 26443195
 335866204
 287727733
 47455727
 1331934291
 1970734649
 1397755335
 169893097
 26280115
 1299330836
 1243935538
 943404143
 564425645
 797120400
 221876668
 82640669
 71715337
 1475336005
 1239619261
 716110630
 389521858
 429304353
 2095486508
 2103351224
 1062077565
 228376490
 1648534296
 1296378573
 1041687989
 652794081
 862743013
 434649549
 1319284218
 1132965604
 1023439344
 501113719
 269034473
 1440755618
 513191702
 2114814220
 1659897411
 1410470738
 62146554
 902697241
 1823719606
 2103717829
 335059144
 1369074794
 1226969842
 1160985095
 1688513480
 719014773
 1016898526
 1572065479
 254831771
 1730306695
 1050892289
 682164231
 645761769
 1036807827
 1115546216
 350494195
 392498993
 2086847458
 211040318
 880589228
 528228018
 1902410839
 2105633209
 553483633
 2032007108
 956102726
 722709262
 1499833787
 1914948730
 1664188846
 976114947
 284708603
 865601258
 2130987997
 1539373327
 176410312
 395099923
 1519647493
 171247043
 1279106307
 171449257
 1080496475
 1263249479
 785754169
 387821209
 2039409255
 168978836
 1209115409
 264871726
 1012693068
 38844922
 1399850574
 100817951
 2060746435
 554642768
 949065370
 842893928
 1273951618
 1585925646
 1172452298
 1173305849
 1786009154
 74121559
 1232016774
 1559563360
 1173334483
 1737684856
 284575121
 76477065
 685744810
 937265432
 2075456566
 1916585839
 1830026308
 324341216
 466097765
 417100975
 1606918197
 1612086979
 1211963210
 54721166
 1731193462
 1178342462
 905728397
 716996495
 1570315312
 727638289
 1009532416
 1119284213
 1205870768
 772083776
 1578484364
 395381503
 1506573225
 221723977
 2033104868
 513212703
 2012513664
 532536851
 1279369014
 1209049568
 864455690
 727398357
 1324455286
 798605759
 2114289772
 186816963
 1535963327
 84177936
 927734073
 233135077
 1482312465
 801785409
 621115062
 1416307767
 1076858699
 259193170
 1731748695
 2045617096
 619626108
 333723715
 1438379146
 2004270174
 1568312667
 565509257
 349118395
 591358639
 729658403
 748593724
 1851540898
 1319151284
 1078209279
 163007383
 1899189083
 105947044
 991313999
 156104961
 1305351855
 1713698078
 644241359
 1048051228
 810803397
 1969211678
 1531440163
 1215523846
 749996632
 1243587754
 473420931
 1476242013
 1754644051
 870220555
 1951949190
 1109449534
 698819880
 1865083244
 1718349631
 1813920738
 1805850664
 1912515204
 274973965
 1365265603
 1178768106
 795770169
 672787912
 1479238029
 1367002681
 1275549638
 740738448
 293391417
 156267150
 1155974430
 8864574
 1509399590
 672675555
 763870251
 1214525331
 300711321
 598976921
 2003296299
 573074752
 1141392645
 13901421
 177699937
 2028457783
 1628848671
 481712092
 987160402
 406736425
 1505680957
 1287517732
 152299860
 1426956663
 1230348305
 1515877109
 1621062843
 1912017346
 1592908124
 1193557631
 1644798273
 1555506987
 2060063466
 558677657
 1741686758
 582181113
 1260251321
 94782438
 499402123
 1954858095
 1007205337
 1631136901
 1736411930
 1448621703
 1407322445
 820519276
 2131675227
 120155072
 335500566
 90542764
 442972713
 1737042166
 1767169795
 1036269237
 438785525
 1024042421
 846720709
 1128404342
 1630946261
 437603869
 29551538
 1680877844
 999626426
 1487082292
 736064702
 1125795211
 604536586
 78825946
 665868383
 1486209283
 648649185
 1656425658
 129579389
 1679480155
 2126509345
 1506930814
 1638912606
 1956247664
 876322344
 1106583215
 266776296
 1410926816
 989486220
 2094707741
 566942019
 451169502
 682926617
 712091474
 1484035767
 357007117
 1200931278
 727036515
 701861834
 193154034
 1448163395
 1685846554
 2017586046
 1335022304
 257885987
 1395405774
 573182176
 180032847
 544529629
 657878651
 603683292
 930423118
 1231224856
 832569567
 1421258391
 680789182
 1600735641
 310782819
 868881858
 1229701992
 527918863
 1057170701
 1332570011
 1247664733
 109620140
 757247518
 1500145856
 2118147238
 525959582
 1800699966
 871383759
 113307490
 124062229
 377965589
 1422731648
 359806986
 364359001
 789495431
 1481986399
 648786988
 228325404
 458777431
 1402863263
 2090025622
 1410553036
 42769041
 1479898323
 1101627262
 2142974976
 1452304879
 1970893506
 1178398727
 469997285
 1947232648
 6927549
 990711415
 1262430324
 2050963725
 319936109
 1342951750
 484792836
 1995650356
 1884494847
 136143362
 525488201
 727800907
 2134385492
 595980286
 1148196825
 1982034100
 1104528675
 725960135
 746594480
 903975979
 1722817896
 254362342
 727172920
 1903878272
 1518850997
 2131643446
 1457919134
 2046199515
 565681872
 1834562453
 1730402061
 1197641663
 1227303204
 53540963
 1645345750
 1109373750
 19905172
 1981590474
 582019518
 494870238
 2000636880
 402254273
 1847183683
 913463289
 259987859
 1560129245
 1775602278
 1262204873
 2024724556
 1981477511
 1380119902
 146649158
 1859596683
 1363070426
 2109684247
 154318809
 1161210033
 1494300229
 1539482299
 2065395834
 379993822
 1757654193
 1611484439
 1796479860
 866138295
 930372320
 625109285
 412143304
 1945177375
 2081345497
 1982863532
 1435249906
 596709786
 1649455102
 197144181
 796282520
 342933157
 1381317061
 601965888
 1847369136
 1481730696
 1432549080
 1553255197
 443699466
 1548673658
 1186793673
 683272046
 1739200596
 548805069
 1278384789
 403726753
 1800359699
 1559300033
 484521470
 1814385424
 1208293767
 2010114596
 317643503
 1576528745
 881862019
 1446213235
 1068464216
 1753424679
 148284466
 250908995
 841536107
 1656248716
 1672095522
 882990149
 1333659231
 1243720807
 881983318
 749177961
 1185095173
 2124709238
 1140246524
 1408592292
 322704116
 371056798
 1948321708
 631116026
 1859241601
 1410727628
 690480395
 608936887
 201698083
 859073709
 1938322848
 1402851876
 18743240
 1076209598
 28442249
 52653638
 1568402034
 70217004
 557931303
 248042783
 245816385
 400444663
 1277938198
 1122185860
 589909893
 564116855
 1337591834
 799395792
 200871345
 218860458
 113688596
 188340416
 442449108
 1188524610
 1680148823
 1962893851
 1655190381
 762512750
 1551189382
 969349784
 2059691735
 131553696
 1268185561
 1091409443
 232208159
 1636737943
 1129499443
 473138818
 568616266
 710787189
 355988910
 1672404889
 1134114860
 790936076
 358922026
 2037122247
 1975370200
 1862581543
 955632848
 1800068078
 978972615
 930100218
 637470847
 1365187728
 287794273
 446179223
 922553494
 453450533
 545908501
 1712198299
 1422630028
 976644602
 955664815
 1292636537
 965233976
 1764102514
 394569039
 1962572915
 887782254
 161508675
 286159586
 397987247
 98794281
 59377156
 697083041
 550584388
 729976741
 1353595578
 2113769362
 741367491
 1938033862
 1086804756
 1719337959
 1731316544
 1448912526
 119995464
 630983030
 21505579
 416836564
 820085435
 614245767
 71278255
 1323212480
 150418741
 1444279415
 345173417
 26702620
 304556775
 2101091858
 1341290959
 1453056309
 1815163493
 138201654
 971579663
 1366042075
 1206340247
 197108821
 1684096384
 1436048495
 137437329
 80559998
 855138308
 1168018049
 973412172
 719524759
 1125442761
 479593738
 517060965
 854085869
 86523390
 376452753
 269520536
 968297183
 85139208
 1386580184
 955715919
 1432324055
 270105045
 1494675651
 1193552760
 959156044
 129609895
 578664849
 1423372139
 1178157517
 2035460765
 1540552909
 1997211640
 133023754
 125196487
 651321127
 308754914
 315997104
 1862412455
 874087571
 1825900137
 2125126509
 430449202
 281781992
 1301177386
 1007196736
 1839968797
 1096388843
 1008994056
 1930017305
 688395328
 427210577
 239266710
 1217294243
 1441846778
 56377312
 378132324
 656140118
 2091535363
 386215571
 2037738538
 1141085083
 986809387
 1126152547
 2004270645
 524839811
 2113236625
 58546477
 1225319900
 297206314
 239799211
 1974541630
 1877334550
 1902505012
 983068422
 1666059815
 2013488014
 806944103
 1182279288
 1070380844
 326462802
 896330860
 1268638962
 462638403
 535900350
 511934405
 888625024
 1093199406
 1310405827
 707729892
 843746185
 1918723480
 447808893
 483448301
 834121504
 2006646285
 354535301
 474391660
 741071851
 1290763750
 268766536
 907019339
 988175177
 893993646
 635041480
 1938511888
 726862748
 1848317155
 519042594
 956313889
 844402242
 348164494
 985851327
 1776670948
 284826777
 1883344827
 1776897337
 1978079250
 766241285
 958063874
 1228146672
 1189678421
 513827937
 1757256862
 419513362
 1552731869
 592363116
 1331413375
 398844123
 582331026
 138960233
 913472603
 1839676607
 1832190569
 111729568
 993370376
 741382307
 1184252513
 567744579
 762987039
 1882035805
 114949632
 1023365640
 2045351408
 1585589356
 29387035
 411348046
 641043194
 1822543742
 238962751
 433377344
 878838870
 462167704
 728312373
 705978878
 438040872
 746964092
 1032009755
 1743967421
 907303523
 54207196
 2101399248
 1085319103
 1187221338
 368395810
 1191215404
 2058852615
 328457068
 65749491
 1486828064
 114475905
 910729463
 1925545394
 832784596
 27739342
 219252714
 1017202061
 1501263067
 1254226206
 1798804525
 595037297
 1913011245
 1261047298
 133815007
 756335571
 1029315993
 1591468851
 1993035730
 951057667
 1046733706
 1491272040
 346847709
 807047095
 481668206
 981360334
 1021288757
 274825092
 1006175127
 1938800559
 1461141817
 200243293
 1069592138
 683045926
 361458252
 562499360
 1386883945
 784897896
 407777059
 716936154
 2062483286
 427220546
 717434971
 1623251203
 1959370740
 936950501
 1241232613
 1682924367
 826783233
 914623446
 200669365
 1270233291
 1938419935
 399951134
 29813982
 78974437
 1295594987
 1490067267
 242355404
 1399387204
 443311935
 671102107
 1371944298
 721597181
 1602901753
 124963818
 1325725339
 2062860440
 1362238566
 1824614056
 1060659601
 2001344144
 807873894
 2039141286
 2006131943
 412587048
 765487079
 671090608
 1716585968
 1597746230
 1346339406
 1071368086
 1761039123
 783788117
 1081651925
 338028234
 1668971700
 2029323406
 571876535
 1858365206
 1637104053
 1616790736
 145910038
 33817416
 487753761
 51552717
 2013876705
 769721558
 230103192
 1082714683
 570964489
 386838354
 1118362031
 486290359
 2014631409
 1883667544
 218834355
 1629485440
 2018232942
 1721497628
 868194918
 537477757
 1895861162
 311615674
 609606536
 343738946
 878426766
 346759282
 1418996254
 1821185331
 1413817881
 1120650567
 95162424
 565464038
 1301119176
 1506733996
 681356206
 978986928
 1656309798
 899671834
 482056468
 1581220182
 427554502
 1967658083
 1768405999
 1568851953
 1555261132
 267622021
 1105382595
 2062706353
 2072729986
 415445964
 2143745888
 1913101531
 210825443
 481532065
 275123304
 23651950
 175190742
 695468128
 2098139012
 2120906011
 876708128
 675638685
 1744303803
 964947238
 1250889744
 666192824
 1494239009
 2108648984
 370071309
 268207970
 899691114
 805395221
 847403488
 956737600
 1685760126
 1124162660
 1139299764
 1206204340
 281825893
 843313709
 1266401762
 602853914
 1294018745
 1106065204
 1077161824
 351574908
 732236206
 1110035820
 379743889
 707838576
 269002918
 780868877
 1733211525
 982416810
 1023961828
 1392889808
 2053272187
 2006813294
 46035375
 1023479661
 1156328661
 49384412
 178276837
 620481909
 1948297835
 242124753
 1478542015
 428254189
 1913932129
 2082113125
 658103027
 247785969
 189558601
 354836682
 1591653050
 1217885941
 1780488536
 877409921
 1123226442
 1807968940
 1262003507
 724423400
 1710908470
 1831296092
 1365619563
 808955869
 786151781
 993528402
 604257586
 615165105
 1069730727
 526946521
 1519687934
 1337385536
 1486956713
 53631098
 1742405732
 756072815
 196954438
 1744897967
 1582574120
 164241296
 1104404183
 907120918
 965855241
 409616091
 1976205803
 1246798047
 1485376991
 1297417614
 1136205718
 1581129271
 365504814
 19669227
 381593303
 185946389
 1670185607
 825127370
 1691483680
 37290095
 566855658
 1942239263
 541138385
 1564928109
 96941964
 1019699022
 221425821
 2049357024
 1007249748
 1249893389
 483619388
 46507390
 1618009226
 356277103
 2142496577
 596050233
 990182969
 260586915
 385890327
 2105557305
 282750093
 1788484800
 417435709
 1564725725
 1257517411
 1476026965
 230444446
 1514518971
 1123161837
 1406937162
 54922924
 1213529928
 1417282074
 247647242
 1292402646
 863328566
 1211514422
 1854308924
 955970744
 1484407917
 1673614668
 1578915349
 1448889720
 1971001642
 1371055363
 916037329
 1541306474
 92769683
 5199000
 1598099404
 1768788010
 958676336
 904272560
 1394776591
 1862463884
 1842504141
 588700836
 1852445262
 1406784816
 1030893547
 1876937315
 1532882017
 493057085
 436936896
 1419825465
 888120484
 1602845941
 1295462395
 1553050797
 1695192616
 159227115
 254383744
 894673242
 1442236315
 213038765
 806866666
 258896560
 568894323
 381903790
 1133515993
 137764997
 251115585
 1755027401
 96639500
 1189151514
 1786483705
 1235681553
 492196591
 835500698
 1517405296
 1456028938
 1332363004
 1515160195
 1443336440
 885925353
 405707085
 2038741162
 1988146994
 1593967537
 1591285516
 1441926564
 665252235
 829003120
 1928754039
 114038413
 1391506091
 421867018
 184387010
 482417151
 928741929
 1322377245
 233890386
 1445121192
 1772432842
 756731559
 1033899149
 1691102823
 114694212
 1340787160
 2002316541
 2087883477
 888031863
 102437594
 457252201
 1546534577
 342082028
 919662447
 1324199272
 1037975152
 1024611877
 504219699
 1979069150
 39570735
 1703632480
 454946823
 1517780826
 666392719
 226486181
 1126628211
 2097916998
 181634089
 1258996692
 180963752
 1961510398
 1830007411
 1181383326
 82830694
 10766141
 579080235
 956011134
 814859691
 2027747399
 216634099
 1684257855
 656234737
 1976978705
 1611022294
 914260958
 395799884
 1977778628
 669478992
 1106838232
 847552196
 1518269720
 162344380
 237637132
 1314229936
 1275401374
 1128874755
 337517439
 1001686769
 238532893
 502970903
 908793098
 799335177
 835409536
 2021677322
 1981836789
 1135258659
 468484372
 1430286144
 845063516
 1869425801
 1057613487
 83572893
 2065246155
 742580010
 1947692007
 1779101548
 1186718742
 742754179
 1603415796
 1975626222
 1329551094
 799541270
 1244842635
 836992659
 1533267887
 1727703300
 1162488980
 705944967
 1445391569
 1110905732
 1975084666
 2060177099
 359543132
 638324833
 220429251
 716251403
 798958506
 1233314492
 499885775
 849340789
 1032100313
 1269608352
 1467554206
 1897507151
 1708891539
 794274412
 2002120991
 1453495066
 1355592127
 45880186
 1514327952
 2110413511
 552744465
 1377353111
 393186653
 1934947553
 2016706775
 1316585154
 1059188131
 1259406506
 645434100
 1725061554
 2041946341
 537820134
 1087264588
 833094050
 1396241454
 1242759661
 1770228800
 701566548
 1741689921
 1432734007
 1265000927
 865968910
 1470853795
 1335973236
 158799351
 1718205696
 1680143786
 1665486766
 1459886601
 643718014
 485045300
 1747392397
 1249137332
 1470311001
 301064812
 322222306
 1365194180
 1329830439
 1671469468
 840365999
 1819517264
 1465385521
 480769611
 964514749
 794739910
 647885088
 2020705744
 1861012296
 380331968
 995866739
 2126453467
 1888869590
 426730042
 1489739068
 426927857
 1861210673
 136511789
 413286689
 1234919379
 950385832
 898449222
 1654838737
 1267259956
 1976334007
 103015311
 1642773828
 1089321816
 1675230547
 1123714151
 239916147
 394980044
 1800106377
 780815154
 895541895
 238798796
 6947081
 2071927645
 312001806
 745953556
 634099218
 78615754
 738868070
 1942687561
 977213914
 765502084
 795607097
 832691006
 1594570158
 235247659
 286272162
 1735867909
 2077969183
 1212691359
 1714995558
 803176228
 1442964681
 624351826
 2066342567
 1798649806
 2118855603
 149886564
 160396437
 1208474608
 860880846
 366396594
 1696695100
 1782729168
 1432308085
 1315973825
 1331920068
 202465184
 1141824447
 362362378
 1731598259
 1826803893
 620269748
 1202489303
 12832032
 1362196046
 290663726
 67294270
 1628032037
 1196580882
 432876915
 1924139492
 412576021
 170957001
 487777
 290744632
 533151405
 2064870865
 967385386
 1770842667
 1083908152
 876193604
 214906491
 816972795
 45591508
 1619836336
 858817876
 884834592
 1171503490
 718488488
 101579348
 1932863202
 477971755
 100559609
 1740574218
 702038709
 1858267522
 442256945
 823052804
 1949299440
 1635986476
 1748989111
