# Supplementary material for: The atmospheric chemistry box model CAABA/MECCA-3.0
Source: Copernicus journal article supplement (doi:10.5194/gmd-4-373-2011), 2011-05-06
Supplement: Supplementary file 9 [file gmd-4-373-2011-supplement.zip › caaba_3.0/multirun/input/example_big.txt]

                     Tgps                       OH                      HO2               j_CH3COCH3                 j_CH3CHO               j_CH3COCHO                 j_CH3OOH                   j_COH2                   j_H2O2                   j_CHOH                   j_HONO                   j_HNO3                   j_HNO4                    j_N2O                   j_N2O5                    j_NO2                   j_NO2O                   j_NOO2                    j_O1D                    j_O3P                    j_PAA                    j_PAN                    j_s10                    j_s18                    j_s19                    j_s20                    j_s21                    j_s25                    j_s27                    j_s28                    j_s29                    j_s30                    j_s31                    j_s32                    j_s33                    j_s34                    j_s35                    j_s36                    j_s37                    j_s38                    j_s39                    j_s40                    j_s41                    j_s42                    j_s43                    j_s44                    j_s45                    j_s46                    j_s47                    j_s48                    j_s49                    j_s50                    j_s51                    j_s52                    j_s53                    j_s54                    j_s55                     j_s7                     j_s9                       O3                     H2O2                   CH3OOH           temp                            CASH_RH                   CASH_T                 DriftAng                      H2O                  Heading                 Latitude                 Longitud                  Mix_ppm              Mix_ppm_old                    P_KAB                   press                     RHI__                     RH__                 RH_old__                      SAT                      TAS                    T_KAB                    U_28V          Uncertainty__RH          Uncertainty_ppm                  WindAng                 WindSpee                      alt                       NO                     H2CO                    CH3OH                   CH3CHO                 CH3COCH3                  CH3COOH                     ISOP                      MVK                      MEK                      CH4                       H2
      200.525130895862160                      0.0                      0.0        0.000000304568431        0.000002481996821        0.000049079119301        0.000002507487593        0.000021031865895        0.000003275241776        0.000014224639917        0.000908258594268        0.000000301437988        0.000002191993302        0.000000000000000        0.000020213094128        0.004125521836365        0.081104301624631        0.010336115327050        0.000015427250005        0.000203202849169        0.000002507487593        0.000000340675238        0.000000000000000        0.000000000004867        0.000000000000000        0.000008607028311        0.000034461494224        0.000000428462123        0.000000000000000        0.000019120073780        0.000003831659852        0.000000000000000        0.000000000000000        0.000000000000000        0.000000000000000        0.000000000000000        0.000000000000000        0.000000000000000        0.000000000000000        0.000000000000000        0.000000000000000        0.000000000000000        0.000000000000000        0.000000000000000        0.000000000000000        0.000000000000000        0.000000000000000        0.000000000000000        0.000000000000000        0.000178183288669        0.000436386489734        0.000000000000000        0.000000600888850        0.000000000000000        0.000000000000000        0.000000001010000        0.000000000000001        0.000000000758950        0.000000000000000                      0.0                      0.0                      0.0       30.127233830128663        5.067175955070767        5.506780607759190        0.000000000000000        0.020251553337270    21778.911392707756000  4877284.815291800500000   808247.446149745610000    20251.553337270456000    21274.464613342901000    99688.184569034565000    99925.967028889529000       47.855178149049770       47.300308995730198       49.689255529176691        0.000000000000000        0.000000000000000     3370.380670080433900      274.006801774385790        5.000000000000000     2140.709294378322700        0.000000000000000        0.000000000000000      115.039910024991490                      0.0                      0.0                      0.0                      0.0                      0.0                      0.0                      0.0                      0.0                      0.0        0.000001800000000        0.000000600000000
      200.525960013494940                      0.0                      0.0        0.000000306301203        0.000002494704018        0.000049412194468        0.000002524076958        0.000021178829761        0.000003295617856        0.000014323147705        0.000914214184307        0.000000303212473        0.000002204122757        0.000000000000000        0.000020318345237        0.004152989339794        0.081673222570296        0.010427239648007        0.000015499131097        0.000204624363186        0.000002524076958        0.000000342857210        0.000000000000000        0.000000000004864        0.000000000000000        0.000008657278599        0.000034709853168        0.000000430772503        0.000000000000000        0.000019245216786        0.000003854025594        0.000000000000000        0.000000000000000        0.000000000000000        0.000000000000000        0.000000000000000        0.000000000000000        0.000000000000000        0.000000000000000        0.000000000000000        0.000000000000000        0.000000000000000        0.000000000000000        0.000000000000000        0.000000000000000        0.000000000000000        0.000000000000000        0.000000000000000        0.000000000000000        0.000179357702258        0.000439097975184        0.000000000000000        0.000000604261353        0.000000000000000        0.000000000000000        0.000000001011124        0.000000000000001        0.000000000759509        0.000000000000000                      0.0                      0.0                      0.0       30.235762392247640        5.049511832666977        5.512261296479532        0.000000000000000        0.020296866594690    21778.412762787400000  4877284.328442795200000   808240.305925996860000    20296.866594689993000    21320.624824664657000    99688.651701100505000    99924.588442104781000       47.657665862694394       47.109158680846079       49.485286038807565        0.000000000000000        0.000000000000000     3379.076919621368700      274.006733360397220        5.000000000000000     2154.246572534989400        0.000000000000000        0.000000000000000      115.155793269387320                      0.0                      0.0                      0.0                      0.0                      0.0                      0.0                      0.0                      0.0                      0.0        0.000001800000000        0.000000600000000
      200.526780884828670                      0.0                      0.0        0.000000336129960        0.000002737979472        0.000054313996841        0.000002772022250        0.000023280405331        0.000003620768151        0.000015727343664        0.001004827870719        0.000000332886837        0.000002419414041        0.000000000000000        0.000022311736653        0.004565038539743        0.089789168629378        0.011450255135233        0.000017015530326        0.000225011276078        0.000002772022250        0.000000376440591        0.000000000000000        0.000000000005305        0.000000000000000        0.000009502678988        0.000038147895871        0.000000472840720        0.000000000000000        0.000021141335246        0.000004233101558        0.000000000000000        0.000000000000000        0.000000000000000        0.000000000000000        0.000000000000000        0.000000000000000        0.000000000000000        0.000000000000000        0.000000000000000        0.000000000000000        0.000000000000000        0.000000000000000        0.000000000000000        0.000000000000000        0.000000000000000        0.000000000000000        0.000000000000000        0.000000000000000        0.000197036584668        0.000482614947393        0.000000000000000        0.000000663320839        0.000000000000000        0.000000000000000        0.000000001106362        0.000000000000001        0.000000000829484        0.000000000000000                      0.0                      0.0                      0.0       30.269921216049347        5.043864726938649        5.513919477351984        0.000000000000000        0.020309348019263    21777.378441767887000  4877296.921272384900000   808231.805172550140000    20309.348019262990000    21333.284610110975000    99688.584959479835000    99923.100389895786000       47.594594144807999       47.047705078991392       49.419677385326089        0.000000000000000        0.000000000000000     3397.611189562586800      274.036980743775700        5.000000000000000     2158.397636481480700        0.000000000000000        0.000000000000000      115.283753232623920                      0.0                      0.0                      0.0                      0.0                      0.0                      0.0                      0.0                      0.0                      0.0        0.000001800000000        0.000000600000000
      200.527606403212050                      0.0                      0.0        0.000000423913878        0.000003454141407        0.000068603411528        0.000003500056522        0.000029389609633        0.000004571318873        0.000019861636377        0.001269207919286        0.000000419960340        0.000003052749307        0.000000000000000        0.000028170397222        0.005765763826404        0.113442603992389        0.014482601328145        0.000021460720440        0.000284147493588        0.000003500056522        0.000000475065345        0.000000000000000        0.000000000006652        0.000000000000000        0.000011990569831        0.000048186904959        0.000000596579965        0.000000000000000        0.000026701822463        0.000005343165088        0.000000000000000        0.000000000000000        0.000000000000000        0.000000000000000        0.000000000000000        0.000000000000000        0.000000000000000        0.000000000000000        0.000000000000000        0.000000000000000        0.000000000000000        0.000000000000000        0.000000000000000        0.000000000000000        0.000000000000000        0.000000000000000        0.000000000000000        0.000000000000000        0.000248915371864        0.000609531186825        0.000000000000000        0.000000836860578        0.000000000000000        0.000000000000000        0.000000001390861        0.000000000000001        0.000000001041068        0.000000000000000                      0.0                      0.0                      0.0       28.837030321658670        5.375232337325214        5.442287477847584        0.000000000000000        0.020049541207013    26500.224661928238000  4877310.242209449400000   808209.419742967580000    20049.541207013324000    21080.972910193916000    99675.602253371151000    99924.119705775127000       51.307441094731757       50.639099833634660       53.250932911390883        0.000000000000000        0.000000000000000     3414.588408843274500      274.381416615280730        5.000000000000000     1995.795275026876700        0.000000000000000        0.000000000000000      115.192826170003500                      0.0                      0.0                      0.0                      0.0                      0.0                      0.0                      0.0                      0.0                      0.0        0.000001800000000        0.000000600000000
      200.528431921595480                      0.0                      0.0        0.000000416219241        0.000003392644788        0.000067423938252        0.000003438516319        0.000028874768313        0.000004490963308        0.000019505879224        0.001247726358522        0.000000412420466        0.000002998623608        0.000000000000000        0.000027677509051        0.005666767741933        0.111563586416586        0.014237360978912        0.000021060860417        0.000279364250859        0.000003438516319        0.000000466613845        0.000000000000000        0.000000000006492        0.000000000000000        0.000011773740374        0.000047357356934        0.000000585907622        0.000000000000000        0.000026238074627        0.000005249140005        0.000000000000000        0.000000000000000        0.000000000000000        0.000000000000000        0.000000000000000        0.000000000000000        0.000000000000000        0.000000000000000        0.000000000000000        0.000000000000000        0.000000000000000        0.000000000000000        0.000000000000000        0.000000000000000        0.000000000000000        0.000000000000000        0.000000000000000        0.000000000000000        0.000244669496122        0.000598989512812        0.000000000000000        0.000000821834986        0.000000000000000        0.000000000000000        0.000000001361496        0.000000000000001        0.000000001017442        0.000000000000000                      0.0                      0.0                      0.0       24.815797402577179        6.565879279973022        5.241173061152598        0.000000000000000        0.019937871608220    26683.204503106241000  4877364.182567962400000   807963.071608709290000    19937.871608220124000    21024.546101645679000    99680.194730210860000    99923.253559601231000       64.655255843942129       63.554939669381817       67.018956134633143        0.000000000000000        0.000000000000000     3416.503457803542000      274.189144434146780        5.000000000000000     1569.080592529566700        0.000000000000000        0.000000000000000      115.265346801126460                      0.0                      0.0                      0.0                      0.0                      0.0                      0.0                      0.0                      0.0                      0.0        0.000001800000000        0.000000600000000
      200.529240233880020                      0.0                      0.0        0.000000451306590        0.000003679085856        0.000073199400181        0.000003731301315        0.000031341393875        0.000004872641250        0.000021158508232        0.001353896383184        0.000000447233366        0.000003251824325        0.000000000000000        0.000030034530433        0.006151992119428        0.121124282591234        0.015466860867048        0.000022821278002        0.000303311549596        0.000003731301315        0.000000506182502        0.000000000000000        0.000000000006993        0.000000000000000        0.000012777464976        0.000051415977011        0.000000635448955        0.000000000000000        0.000028481681040        0.000005693947136        0.000000000000000        0.000000000000000        0.000000000000000        0.000000000000000        0.000000000000000        0.000000000000000        0.000000000000000        0.000000000000000        0.000000000000000        0.000000000000000        0.000000000000000        0.000000000000000        0.000000000000000        0.000000000000000        0.000000000000000        0.000000000000000        0.000000000000000        0.000000000000000        0.000265568878335        0.000650219790976        0.000000000000000        0.000000890833602        0.000000000000000        0.000000000000000        0.000000001470633        0.000000000000001        0.000000001097088        0.000000000000000        0.000000040124098                      0.0                      0.0       23.847016567353819        6.776314887755734        5.192763022057359        0.000000000000000        0.019489418038276    23261.914730541168000  4877081.390531556700000   807585.280792294650000    19489.418038276279000    20561.020453986024000    99694.584270617153000    99924.066818088642000       67.010967309515124       65.831720620293154       69.451515866054848        0.000000000000000        0.000000000000000     3415.360679749061100      274.369317942096470        5.000000000000000     1480.774887136485600        0.000000000000000        0.000000000000000      115.199437140614550                      0.0                      0.0                      0.0                      0.0                      0.0                      0.0                      0.0                      0.0                      0.0        0.000001800000000        0.000000600000000
      200.530053617774970                      0.0                      0.0        0.000000550345613        0.000004488701911        0.000089401867574        0.000004555345215        0.000038268807770        0.000005947747123        0.000025831901248        0.001653285804155        0.000000545725427        0.000003967737005        0.000000000000000        0.000036657351905        0.007513074198025        0.147968416358925        0.018892812904604        0.000027817038736        0.000370535202535        0.000004555345215        0.000000617768888        0.000000000000000        0.000000000008477        0.000000000000000        0.000015602638689        0.000062798625125        0.000000775189310        0.000000000000000        0.000034777171948        0.000006950364272        0.000000000000000        0.000000000000000        0.000000000000000        0.000000000000000        0.000000000000000        0.000000000000000        0.000000000000000        0.000000000000000        0.000000000000000        0.000000000000000        0.000000000000000        0.000000000000000        0.000000000000000        0.000000000000000        0.000000000000000        0.000000000000000        0.000000000000000        0.000000000000000        0.000324335414070        0.000794035945655        0.000000000000000        0.000001087778131        0.000000000000000        0.000000000000000        0.000000001789409        0.000000000000002        0.000000001331199        0.000000000000000        0.000000040637539                      0.0                      0.0       23.990053504675593        6.694909478703841        5.199915765412985        5.366709624862496        0.019391286239853    23226.156149284870000  4876941.615126675000000   807262.569182487790000    19391.286239853405000    20454.972084119974000    99674.242237953556000    99922.825886858642000       66.097584430729654       64.947081836932952       68.509445723719338        0.000000000000000        0.000000000000000     3447.074406724224000      273.978720285366190        5.000000000000000     1493.686001033989200        0.000000000000000        0.000000000000000      115.303366709446520                      0.0                      0.0                      0.0                      0.0                      0.0                      0.0                      0.0                      0.0                      0.0        0.000001800000000        0.000000600000000
      200.530876657093810                      0.0                      0.0        0.000000796380895        0.000006495448430        0.000126281333389        0.000006485269567        0.000054560853931        0.000008447701995        0.000036881906694        0.002341956815897        0.000000775221220        0.000005666454507        0.000000000000000        0.000051659775320        0.010626379577311        0.207643961827846        0.026497287088143        0.000039567574078        0.000520799123384        0.000006485269567        0.000000872932162        0.000000000000000        0.000000000012178        0.000000000000000        0.000022266974385        0.000088560472269        0.000001099165334        0.000000000000000        0.000049160766618        0.000009859210963        0.000000000000000        0.000000000000000        0.000000000000000        0.000000000000000        0.000000000000000        0.000000000000000        0.000000000000000        0.000000000000000        0.000000000000000        0.000000000000000        0.000000000000000        0.000000000000000        0.000000000000000        0.000000000000000        0.000000000000000        0.000000000000000        0.000000000000000        0.000000000000000        0.000459012713065        0.001123802945983        0.000000000000000        0.000001533417029        0.000000000000000        0.000000000000000        0.000000002566376        0.000000000000002        0.000000001904353        0.000000000000000        0.000000042807082                      0.0                      0.0       22.495138914343084        6.720021812515120        5.187792818460483      130.180710030989870        0.019216333897575     7687.953534288872100  4878151.611083732900000   808275.037664920090000    19216.333897574699000    20271.557233202700000    99692.585849125870000    98327.142791226288000       70.950466042958283       69.706836623195258       73.538451680381371      740.880738064587600     3255.731030871021200     3469.451586424105200      274.082300610155810        5.380868922872860     1487.414322449150200    11331.122504698214000       82.104457802163722      252.477813342957350                      0.0                      0.0                      0.0                      0.0                      0.0                      0.0                      0.0                      0.0                      0.0        0.000001800000000        0.000000600000000
      200.531682076114150        0.000000000000551        0.000000000011720        0.000001105309991        0.000009017504800        0.000149949603381        0.000008105515621        0.000068774150191        0.000010397202425        0.000046835162384        0.002827305869094        0.000000956084837        0.000007229872834        0.000000000000000        0.000060125080425        0.012748413079678        0.235982751408896        0.029992830732752        0.000049317405391        0.000598559545570        0.000008105515621        0.000001038004627        0.000000000000000        0.000000000016719        0.000000000000000        0.000028364457307        0.000104123402664        0.000001336565571        0.000000000000000        0.000058639121530        0.000012051572525        0.000000000000000        0.000000000000000        0.000000000000000        0.000000000000000        0.000000000000000        0.000000000000000        0.000000000000000        0.000000000000000        0.000000000000000        0.000000000000000        0.000000000000000        0.000000000000000        0.000000000000000        0.000000000000000        0.000000000000000        0.000000000000000        0.000000000000000        0.000000000000000        0.000552141724420        0.001351238966697        0.000000000000000        0.000001800901942        0.000000000000000        0.000000000000000        0.000000003425398        0.000000000000003        0.000000002516156        0.000000000000000        0.000000057364676                      0.0                      0.0       17.301281833724300        6.649831720350711        5.083308000335183      418.250723405715350        0.017223052023783     3123.828910680247600  4882124.557106776200000   812292.835104453140000    17223.052023782588000    18175.375692935184000    99417.800840337091000    92204.910674571976000       81.918623096896511       80.476931364333041       84.929730644422179     1482.117380299856700     9215.103439035081500     3474.537051277349700      274.258268641127760        5.904675127382318     1270.511142295102200    25461.248888710630000      609.577712491586790      791.957810952814730        0.000000001159367                      0.0                      0.0                      0.0                      0.0                      0.0                      0.0                      0.0                      0.0        0.000001800000000        0.000000600000000
      200.532501960076930        0.000000000000560        0.000000000027316        0.000001368073886        0.000011184027846        0.000157103310449        0.000008883141832        0.000076437043959        0.000011167452137        0.000052138348147        0.003006132405404        0.000001021300539        0.000008067692722        0.000000000000000        0.000059878434620        0.013480572308088        0.237533684074565        0.030081983463458        0.000053144373995        0.000608881805966        0.000008883141832        0.000001060692777        0.000000000000000        0.000000000020041        0.000000000000000        0.000031617942698        0.000108193613224        0.000001403423527        0.000000000000000        0.000061113668634        0.000012802869694        0.000000000000000        0.000000000000000        0.000000000000000        0.000000000000000        0.000000000000000        0.000000000000000        0.000000000000000        0.000000000000000        0.000000000000000        0.000000000000000        0.000000000000000        0.000000000000000        0.000000000000000        0.000000000000000        0.000000000000000        0.000000000000000        0.000000000000000        0.000000000000000        0.000585208401595        0.001433065119346        0.000000000000000        0.000001805967593        0.000000000000000        0.000000000000000        0.000000003988521        0.000000000000004        0.000000002874533        0.000000000000000        0.000000063622962                      0.0                      0.0       14.234724514140417        5.426676330548560        5.123075235388090      185.382477843433890        0.014635206128723     5100.263270990704800  4888186.961229304800000   819529.780158530460000    14635.206128723090000    15412.520566476340000    99056.304341882307000    85696.472722730614000       78.273523922445904       77.180322921439668       81.278551652045365     1369.828840879767100    13225.538291291403000     3513.898118993039100      274.297236254738380        6.000000000000000     1137.299064560122400    26825.950296879852000     1446.890448495223200     1391.693894946479100        0.000000000056643                      0.0                      0.0                      0.0                      0.0                      0.0                      0.0                      0.0                      0.0        0.000001800000000        0.000000600000000
      200.533340110505890        0.000000000000474        0.000000000026933        0.000001919893269        0.000015750825165        0.000183616591728        0.000010750924674        0.000094545112301        0.000013168279146        0.000064060069917        0.003551908085768        0.000001186921784        0.000009907950612        0.000000000000000        0.000063639778843        0.015885426877416        0.268641254358934        0.033918563491220        0.000062362909483        0.000694077472810        0.000010750924674        0.000001167209089        0.000000000000000        0.000000000026586        0.000000000000000        0.000038803851799        0.000125623129200        0.000001593735845        0.000000000000000        0.000070122765100        0.000014854938658        0.000000000000000        0.000000000000000        0.000000000000000        0.000000000000000        0.000000000000000        0.000000000000000        0.000000000000000        0.000000000000000        0.000000000000000        0.000000000000000        0.000000000000000        0.000000000000000        0.000000000000000        0.000000000000000        0.000000000000000        0.000000000000000        0.000000000000000        0.000000000000000        0.000690133760010        0.001689775827416        0.000000000000000        0.000001933922130        0.000000000000000        0.000000000000000        0.000000005111214        0.000000000000007        0.000000003569079        0.000000000000000        0.000000058819211                      0.0                      0.0       11.547416911214535        4.167435645707226        5.046835108828248     -190.564955659225230        0.010733194748204    15069.693263195508000  4886363.798507222000000   828845.606200800510000    10733.194748203687000    11272.115009633098000    98962.502536172848000    77369.169594677442000       61.109277264915583       60.604684664414009       63.644435001513045     1091.854797917830900    14160.262195774521000     3523.898502253029600      274.888025313313620        5.992356617895766     1056.361607380883900    18283.418380256262000      726.853929135250720     2218.802810833538400        0.000000000022533        0.000000000123830                      0.0                      0.0                      0.0                      0.0                      0.0                      0.0                      0.0        0.000001800000000        0.000000600000000
      200.534171448966790        0.000000000000390        0.000000000024457        0.000002354419328        0.000019387114489        0.000196379081582        0.000011743462863        0.000105289254590        0.000014086085919        0.000070696178600        0.003824366610283        0.000001249493305        0.000010916297139        0.000000000000000        0.000061884124109        0.017088754886870        0.281356864661348        0.035449736146110        0.000066346850304        0.000730673084450        0.000011743462863        0.000001173983233        0.000000000000002        0.000000000031016        0.000000000000000        0.000042722449114        0.000133804498340        0.000001643066010        0.000000000000000        0.000073589988489        0.000015664706802        0.000000000000000        0.000000000000000        0.000000000000001        0.000000000000000        0.000000000000000        0.000000000000000        0.000000000000000        0.000000000000000        0.000000000000000        0.000000000000000        0.000000000000000        0.000000000000000        0.000000000000000        0.000000000000000        0.000000000000000        0.000000000000000        0.000000000000000        0.000000000000000        0.000742241565217        0.001817072209998        0.000000000000001        0.000001898017958        0.000000000000000        0.000000000000001        0.000000005803713        0.000000000000010        0.000000003933901        0.000000000000000        0.000000061658801                      0.0                      0.0        7.488649943267355        2.978525756263875        4.880231117223989      426.912910035434380        0.006072358643493    11465.528270010114000  4879755.674972571400000   836936.035110402970000     6072.358643493178500     6344.065639761413900    98961.653982478718000    70699.551187408084000       41.814721860102999       41.930077754610764       43.824145348016884      687.588188837232110    14679.577969517119000     3497.105480721591900      274.958029126970980        5.859324132766697      862.258084844016820    27137.856181616695000     1018.307151396893300     2936.624308124643900        0.000000000018516        0.000000000348291                      0.0                      0.0                      0.0                      0.0                      0.0                      0.0                      0.0        0.000001800000000        0.000000600000000
      200.534986478902250        0.000000000000458        0.000000000025289        0.000002791135470        0.000023103173282        0.000205541415832        0.000012452262121        0.000114020117141        0.000014643078575        0.000075657285991        0.004018064086512        0.000001273072836        0.000011642269078        0.000000000000000        0.000057976993349        0.017956973952641        0.289787003517011        0.036450436925931        0.000068280113927        0.000754921391471        0.000012452262121        0.000001143015393        0.000000000000038        0.000000000034734        0.000000000000000        0.000045568410226        0.000139509613425        0.000001641318433        0.000000000000000        0.000075308007391        0.000016061952254        0.000000000000000        0.000000000000003        0.000000000000010        0.000000000000002        0.000000000000000        0.000000000000000        0.000000000000000        0.000000000000000        0.000000000000003        0.000000000000000        0.000000000000005        0.000000000000000        0.000000000000000        0.000000000000001        0.000000000000000        0.000000000000001        0.000000000000000        0.000000000000000        0.000779250770080        0.001908396373389        0.000000000000015        0.000001804303961        0.000000000000003        0.000000000000024        0.000000006314603        0.000000000000037        0.000000004147844        0.000000000000000        0.000000060663817                      0.0                      0.0        1.714001014509147        3.543754664180490        4.621931037366646      980.220058138629380        0.005956837725818     4583.108783648543100  4881940.521287990700000   848878.415350628430000     5956.837725818409100     6259.369292449438900    98996.636471668389000    64593.064560186867000       56.252208790350913       55.606229066518068       58.445364843611436      122.468009278801050    15098.447317741186000     3451.280634562987400      275.008150257623530        6.000000000000000      650.180798280171530    28614.345114245640000     2692.142656775386100     3643.572874932834600        0.000000000013000        0.000000000488819                      0.0                      0.0                      0.0                      0.0                      0.0                      0.0                      0.0        0.000001800000000        0.000000600000000
      200.535805460365740        0.000000000000438        0.000000000021936        0.000003078025225        0.000025632389476        0.000201856281971        0.000012348920336        0.000115444651390        0.000014273416586        0.000075542795395        0.003958146250383        0.000001213400344        0.000011596923594        0.000000000000000        0.000050740918674        0.017694934618520        0.281602944908251        0.035374813803262        0.000065813655084        0.000734575229924        0.000012348920336        0.000001044243093        0.000000000000673        0.000000000036193        0.000000000000000        0.000045348973931        0.000136782428631        0.000001536457110        0.000000000000000        0.000072407555619        0.000015450141384        0.000000000000001        0.000000000000062        0.000000000000195        0.000000000000041        0.000000000000002        0.000000000000007        0.000000000000000        0.000000000000000        0.000000000000062        0.000000000000004        0.000000000000099        0.000000000000007        0.000000000000000        0.000000000000011        0.000000000000000        0.000000000000015        0.000000000000001        0.000000000000000        0.000767135842159        0.001877909473050        0.000000000000284        0.000001613095064        0.000000000000050        0.000000000000450        0.000000006452544        0.000000000000504        0.000000004064503        0.000000000000002        0.000000052863931                      0.0                      0.0       -3.138041316189575        3.093624286397676        4.432428186137960      376.704471000860850        0.004184020384251     6816.845928650474000  4887081.485960208800000   861684.843960844330000     4184.020384251175500     4395.850641237208900    99029.254245248376000    59210.910425201320000       51.872212912684098       50.293956921834194       52.834653808544807     -368.352175855592290    15801.491971541704000     3435.980907763655100      275.250634463528120        6.000000000000000      494.331202328765530    27828.626146786959000     2266.706266070726500     4310.879715894362600        0.000000000014729        0.000000000463463                      0.0                      0.0                      0.0                      0.0                      0.0                      0.0        0.499525460985137        0.000001800000000        0.000000600000000
      200.536624441829220        0.000000000000465        0.000000000017194        0.000002900602814        0.000024281021562        0.000172552976569        0.000010622547181        0.000101189568505        0.000012105548360        0.000065368496579        0.003389609837380        0.000001007415778        0.000010010541880        0.000000000000000        0.000039291594248        0.015168301600783        0.238959050832298        0.029995466540856        0.000055224893945        0.000623589377896        0.000010622547181        0.000000835162651        0.000000000005228        0.000000000032878        0.000000000000000        0.000039122501054        0.000116813751147        0.000001254847642        0.000000000000002        0.000060726803357        0.000012958159929        0.000000000000008        0.000000000000493        0.000000000001575        0.000000000000329        0.000000000000014        0.000000000000053        0.000000000000003        0.000000000000000        0.000000000000510        0.000000000000033        0.000000000000814        0.000000000000060        0.000000000000001        0.000000000000092        0.000000000000001        0.000000000000124        0.000000000000005        0.000000000000000        0.000656754909925        0.001608033256742        0.000000000002277        0.000001265290075        0.000000000000399        0.000000000003588        0.000000005701809        0.000000000003925        0.000000003503737        0.000000000000020        0.000000056005234                      0.0                      0.0       -6.740963106374116        2.265664843823516        4.295139061762520        3.307090228112031        0.002385896140834     8542.024041703098200  4888461.350549782600000   878515.951678904940000     2385.896140834001900     2494.175195718897600    99063.313903399772000    54862.589112442503000       36.549223383750174       34.779388582235306       36.349871897816342     -750.294480875660380    16353.927527383295000     3436.759323141732200      275.403465856466200        6.193491039709779      418.180154663510170    27112.469612434910000     1654.486634006627800     4885.622603027317400        0.000000000020972        0.000000000407431                      0.0                      0.0                      0.0                      0.0                      0.0                      0.0        0.483309835358924        0.000001800000000        0.000000600000000
      200.537443423292700        0.000000000000394        0.000000000015475        0.000002854477867        0.000024011621389        0.000157042732937        0.000009702469711        0.000093749553762        0.000010955760260        0.000059899639487        0.003088368499462        0.000000896224944        0.000009169482536        0.000000000000000        0.000034636661398        0.013827807140642        0.216470726350600        0.027154404129120        0.000049589477124        0.000564838917967        0.000009702469711        0.000000721865356        0.000000000023594        0.000000000031752        0.000000000000000        0.000035821177281        0.000106245833209        0.000001102222181        0.000000000000006        0.000054493603426        0.000011630715434        0.000000000000039        0.000000000002272        0.000000000007293        0.000000000001517        0.000000000000066        0.000000000000249        0.000000000000013        0.000000000000000        0.000000000002397        0.000000000000159        0.000000000003827        0.000000000000286        0.000000000000003        0.000000000000443        0.000000000000003        0.000000000000589        0.000000000000026        0.000000000000000        0.000598272261396        0.001464749397100        0.000000000010489        0.000001078157510        0.000000000001827        0.000000000016479        0.000000005352307        0.000000000017931        0.000000003355379        0.000000000000093        0.000000066361653                      0.0                      0.0       -8.750019224572082        1.827357281527223        4.228678109513783     -180.053493049827380        0.001595361474606     8709.231464601551100  4889387.727508825200000   895925.201535507110000     1595.361474606182600     1657.085778498515300    99097.090603845791000    51622.212495548098000       27.441616482870018       26.011352398305881       27.016857150025075     -948.597878271975900    16775.114662759996000     3448.090932133258300      275.239390084012540        6.698831812603622      410.012891582558440    25010.364298637833000     1569.872025498818400     5337.817246972821500        0.000000000033124        0.000000000333133                      0.0                      0.0                      0.0                      0.0                      0.0                      0.0        0.458535775397691        0.000001800000000        0.000000600000000
      200.538262404756130        0.000000000000278        0.000000000012550        0.000003128604438        0.000026404724441        0.000163438206934        0.000010117955655        0.000098554048409        0.000011366921234        0.000062486673495        0.003215134291756        0.000000921389147        0.000009578695477        0.000000000000000        0.000036045980264        0.014404733524649        0.224713764952317        0.028176882814319        0.000051312465952        0.000586225394465        0.000010117955655        0.000000730237206        0.000000000053693        0.000000000034690        0.000000000000000        0.000037400893759        0.000110526178042        0.000001125859294        0.000000000000012        0.000056288107170        0.000012014182440        0.000000000000091        0.000000000005208        0.000000000016739        0.000000000003476        0.000000000000152        0.000000000000574        0.000000000000029        0.000000000000000        0.000000000005532        0.000000000000369        0.000000000008827        0.000000000000665        0.000000000000006        0.000000000001030        0.000000000000006        0.000000000001366        0.000000000000061        0.000000000000000        0.000622821365649        0.001525364163637        0.000000000024026        0.000001082740729        0.000000000004177        0.000000000037722        0.000000005715638        0.000000000040987        0.000000003735242        0.000000000000214        0.000000064301525                      0.0                      0.0      -10.567005728552289        1.519343233766194        4.170198172408981     -154.883134270224840        0.001082072239094     8666.411212672459400  4890339.800845942500000   913810.921290574710000     1082.072239093708700     1114.150574408634200    99115.455813702414000    49176.384593519775000       20.251693745797805       19.358540000672509       19.930827023643861    -1141.171999862544200    17167.671843657045000     3424.320313798854800      275.343793726993740        8.900708648551579      494.322753246282960    25167.972017702228000     1717.392850747840400     5695.367310063802500        0.000000000036343        0.000000000530007                      0.0                      0.0                      0.0                      0.0                      0.0                      0.0        0.433483667025056        0.000001800000000        0.000000600000000
      200.539081386219610        0.000000000000335        0.000000000011752        0.000003398724083        0.000028822832271        0.000164908907064        0.000010231819712        0.000101016442427        0.000011484203809        0.000063222878527        0.003244596343376        0.000000931143518        0.000009711699621        0.000000000000001        0.000036471743061        0.014535693499387        0.226029876234363        0.028335499455995        0.000052210190763        0.000590077377063        0.000010231819712        0.000000733639010        0.000000000183661        0.000000000037807        0.000000000000000        0.000037911380226        0.000111380092667        0.000001136118663        0.000000000000032        0.000056728943917        0.000012129341611        0.000000000000328        0.000000000018102        0.000000000058374        0.000000000012080        0.000000000000540        0.000000000002055        0.000000000000104        0.000000000000000        0.000000000019667        0.000000000001330        0.000000000031311        0.000000000002376        0.000000000000023        0.000000000003690        0.000000000000022        0.000000000004861        0.000000000000221        0.000000000000000        0.000628529661251        0.001539154287398        0.000000000083376        0.000001088402578        0.000000000014447        0.000000000130758        0.000000006056359        0.000000000141708        0.000000004507341        0.000000000000765        0.000000062794748        0.000000000804027        0.000000000150798      -12.776807062975573        1.374745523267290        4.083766710828766      369.443727255153310        0.000797087206550     6088.193558153429900  4893470.252768502600000   931051.093913783200000      797.087206549845860      816.359706396791240    99127.754673646865000    46988.051296880061000       17.144348044727746       16.333893611056482       16.731170633035493    -1362.486018546021800    17451.882717473869000     3417.780226938542000      275.334333285403770        9.958641411416222      488.616566434222360    25627.790969151647000     2235.010325375203100     6028.992332636421500        0.000000000025505        0.000000000660796                      0.0                      0.0                      0.0                      0.0                      0.0                      0.0        0.464025098545469        0.000001800000000        0.000000600000000
      200.539900367683090        0.000000000000370        0.000000000012106        0.000003510965896        0.000029848836689        0.000165496012236        0.000010279622236        0.000102091697817        0.000011519344679        0.000063508822777        0.003258039390501        0.000000935827745        0.000009758950759        0.000000000000001        0.000036633998283        0.014603893523132        0.226791789820567        0.028426216846742        0.000052529898159        0.000592083562013        0.000010279622236        0.000000737085923        0.000000000242717        0.000000000038746        0.000000000000000        0.000038092335890        0.000111883819412        0.000001140767533        0.000000000000041        0.000056960824354        0.000012191272752        0.000000000000436        0.000000000023980        0.000000000077361        0.000000000016001        0.000000000000717        0.000000000002734        0.000000000000138        0.000000000000000        0.000000000026130        0.000000000001770        0.000000000041583        0.000000000003160        0.000000000000030        0.000000000004908        0.000000000000029        0.000000000006459        0.000000000000295        0.000000000000000        0.000631115196486        0.001544237419654        0.000000000110524        0.000001092628993        0.000000000019121        0.000000000173087        0.000000006170453        0.000000000187548        0.000000004820680        0.000000000001018        0.000000065626188        0.000000000846389        0.000000000148910      -15.091459527294866        1.338364680911505        3.995332185629954      551.353537175444790        0.000678321501903     9053.268479599280900  4903074.787703467500000   941638.653423740760000      678.321501903411900      695.357170874453000    99122.616999515623000    45049.253010678323000       17.081456125514585       16.006616769634814       16.406701084915522    -1597.963395398296100    17768.545515239817000     3440.840243332610500      275.486464429601990       10.827743471618888      453.517749756138580    23373.507516946123000     2634.380500541225000     6334.926491246131300        0.000000000031982        0.000000000511021                      0.0        4.743329099617647                      0.0                      0.0                      0.0                      0.0        0.474951077355528        0.000001800000000        0.000000600000000
      200.540719349146570        0.000000000000369        0.000000000009720        0.000003679926267        0.000031425631296        0.000160649354395        0.000010001712140        0.000100942912193        0.000011225881710        0.000061841557557        0.003164462497736        0.000000915941321        0.000009532596713        0.000000000000003        0.000035694492814        0.014160403705640        0.219731027195093        0.027536057486496        0.000051877309627        0.000574107283732        0.000010001712140        0.000000719996344        0.000000000723257        0.000000000042263        0.000000000000000        0.000037187232399        0.000108509956748        0.000001116737521        0.000000000000109        0.000055380132457        0.000011884553540        0.000000000001350        0.000000000072352        0.000000000233829        0.000000000048247        0.000000000002195        0.000000000008442        0.000000000000426        0.000000000000000        0.000000000080204        0.000000000005489        0.000000000127337        0.000000000009732        0.000000000000092        0.000000000015139        0.000000000000091        0.000000000019823        0.000000000000916        0.000000000000000        0.000612993069936        0.001501527304670        0.000000000333163        0.000001071673477        0.000000000057442        0.000000000520969        0.000000006634322        0.000000000563423        0.000000007045593        0.000000000003140        0.000000066310552        0.000000000745891        0.000000000128027      -17.009723473366446        1.150479097518226        3.922442790976174      618.873833785890840        0.000421974342401    15960.433758218811000  4915363.000250999800000   944441.736466486470000      421.974342400588850      425.835743524913600    99111.736509564827000    43265.257907582272000       11.184932565149673       10.975001124333662       11.060616957411241    -1785.506794095936100    18032.092448312858000     3445.839325204135500      275.654801844299530      -15.413709971914175      808.594671495198900    22605.342082627081000     2590.619546548376100     6626.251870382471700        0.000000000034595        0.000000000315145                      0.0        7.878933209912588                      0.0                      0.0                      0.0                      0.0        0.464156927177062        0.000001800000000        0.000000600000000
      200.541538876033710        0.000000000000271        0.000000000009128        0.000003643662660        0.000031174370580        0.000155129730645        0.000009654211478        0.000097964620264        0.000010833359371        0.000059698440678        0.003054027134020        0.000000885698274        0.000009211102200        0.000000000000005        0.000034466834003        0.013677212307394        0.211943785104611        0.026564661229547        0.000050282509452        0.000553896255139        0.000009654211478        0.000000695969909        0.000000001017846        0.000000000042284        0.000000000000000        0.000035920608019        0.000104842269095        0.000001080387951        0.000000000000148        0.000053455007819        0.000011472198542        0.000000000001928        0.000000000102304        0.000000000330875        0.000000000068202        0.000000000003120        0.000000000012039        0.000000000000609        0.000000000000000        0.000000000114143        0.000000000007837        0.000000000181105        0.000000000013866        0.000000000000132        0.000000000021593        0.000000000000129        0.000000000028217        0.000000000001310        0.000000000000000        0.000591669033067        0.001448006210881        0.000000000471091        0.000001038017546        0.000000000081089        0.000000000735788        0.000000006712610        0.000000000795375        0.000000008256072        0.000000000004478        0.000000073037298        0.000000000536296        0.000000000124528      -18.729579837641644        1.081572604497117        3.856958719152103      725.022910262736220        0.000310774577599    28503.010118603092000  4928086.740422723800000   946171.132609348740000      310.774577598873860      310.444649309742090    99085.884353209738000    41680.827737708758000        9.358193835161256        9.322361244372274        9.317787287617062    -1951.852101545242000    18262.597329718541000     3426.680107910187400      275.791398668789720       -3.114206020363319      785.832605898041490    22868.859319717609000     2797.628819635060200     6892.323930219652500        0.000000000037719        0.000000000079712                      0.0                      0.0                      0.0                      0.0                      0.0                      0.0                      0.0        0.000001800000000        0.000000600000000
      200.542362819503300        0.000000000000307        0.000000000010427        0.000003821181742        0.000032779720736        0.000154412300481        0.000009625370641        0.000098671549024        0.000010811249512        0.000059551101841        0.003038714240567        0.000000887366192        0.000009211179063        0.000000000000009        0.000034386912935        0.013610079827501        0.210728481422872        0.026404468916090        0.000050726055415        0.000550784938881        0.000009625370641        0.000000696536939        0.000000001927841        0.000000000046187        0.000000000000000        0.000035897456170        0.000104320913271        0.000001081312369        0.000000000000274        0.000053245006086        0.000011452468841        0.000000000003714        0.000000000194829        0.000000000630640        0.000000000129893        0.000000000005980        0.000000000023164        0.000000000001172        0.000000000000000        0.000000000219030        0.000000000015105        0.000000000347192        0.000000000026659        0.000000000000253        0.000000000041534        0.000000000000248        0.000000000054159        0.000000000002527        0.000000000000000        0.000588962972041        0.001442225972743        0.000000000897114        0.000001042811351        0.000000000154149        0.000000001399124        0.000000007563763        0.000000001511632        0.000000012376427        0.000000000008615        0.000000081109015        0.000000000652213        0.000000000122478      -20.210986330841784        1.224594899705767        3.806188077750702      840.280787785472970        0.000434258234705    35682.312837521305000  4941097.051905045300000   947686.402608904640000      434.258234704805030      444.437577365003790    99057.425476338190000    40289.734515916309000       15.696251302267141       14.281242248160341       14.620936333393988    -2100.729932861443600    18521.560181410965000     3413.370783455704000      275.725333717925250       13.327227857361780      411.996971289127600    23221.731807779823000     3174.454657642295800     7133.253420139242700        0.000000000031562        0.000000000036484                      0.0                      0.0                      0.0                      0.0                      0.0                      0.0                      0.0        0.000001800000000        0.000000600000000
      200.543185204795860        0.000000000000341        0.000000000010965        0.000004064942937        0.000034886171684        0.000154951501561        0.000009676610898        0.000100306818276        0.000010876995659        0.000059903278689        0.003047790552139        0.000000899187952        0.000009302177772        0.000000000000018        0.000034602811664        0.013654059506913        0.211164227777700        0.026459313335172        0.000051853109232        0.000552365377470        0.000009676610898        0.000000705257324        0.000000004044846        0.000000000052755        0.000000000000000        0.000036213231315        0.000104602569023        0.000001091955042        0.000000000000601        0.000053479437823        0.000011528481773        0.000000000007933        0.000000000411205        0.000000001331314        0.000000000274054        0.000000000012709        0.000000000049410        0.000000000002503        0.000000000000000        0.000000000465804        0.000000000032272        0.000000000737736        0.000000000056801        0.000000000000539        0.000000000088534        0.000000000000529        0.000000000115172        0.000000000005400        0.000000000000000        0.000591006715909        0.001447153289446        0.000000001890628        0.000001061874760        0.000000000324603        0.000000002949493        0.000000009411864        0.000000003183516        0.000000021843630        0.000000000018372        0.000000075770870        0.000000000830152        0.000000000139912      -23.045139673313660        1.480819041751412        3.637212146555799      792.184453880614340        0.000555652959548    30578.752217548383000  4954119.906446327500000   949187.613766694910000      555.652959548215560      580.574663671123970    99011.452365110032000    38244.238104845725000       26.360594903353238       22.022292644769944       23.020998718766023    -2375.352417984070100    18210.195959745666000     3367.287736535554400      275.316624384662190        7.780095604674767      197.790265272373770    23355.387247125676000     3132.669441861685300     7500.967416294696700        0.000000000024341        0.000000000046056                      0.0                      0.0                      0.0                      0.0                      0.0                      0.0                      0.0        0.000001800000000        0.000000600000000
      200.544007590088460        0.000000000000381        0.000000000010927        0.000004635911901        0.000039341050692        0.000160771250314        0.000010075670442        0.000106053523068        0.000011337788992        0.000062454121689        0.003159061878680        0.000000955098358        0.000009780610064        0.000000000000053        0.000036129301581        0.014149466236077        0.218681119523693        0.027391994500050        0.000055946589877        0.000572479852228        0.000010075670442        0.000000749772152        0.000000011694044        0.000000000070588        0.000000000000000        0.000037982692325        0.000108582148872        0.000001152061049        0.000000000002029        0.000055593296210        0.000012058222313        0.000000000023299        0.000000001194873        0.000000003870145        0.000000000795642        0.000000000037113        0.000000000144894        0.000000000007351        0.000000000000000        0.000000001362997        0.000000000094757        0.000000002155796        0.000000000166436        0.000000000001579        0.000000000259639        0.000000000001553        0.000000000337011        0.000000000015855        0.000000000000000        0.000613177694098        0.001501066568100        0.000000005488983        0.000001146247145        0.000000000940614        0.000000008563459        0.000000015808867        0.000000009231267        0.000000055769846        0.000000000053885        0.000000081771531        0.000000000876905        0.000000000175841      -28.123341580427066        1.888804537604835        3.257242096877229       95.612517317385766        0.000530215320252     5639.839067349737000  4963826.710678118300000   957691.385921453240000      530.215320252365130      563.281239135673220    98110.916509471863000    35332.348918188443000       39.665530316061783       30.300592270551075       32.191889027605008    -2846.418091148490900    16722.392549782235000     3352.502415070855000      275.438666734268000        6.057211239927727      104.547545134428330    24735.503990478173000     2779.278918045488400     8051.459839998383400        0.000000000042870        0.000000000147900                      0.0                      0.0                      0.0                      0.0                      0.0                      0.0                      0.0        0.000001800000000        0.000000600000000
      200.544818615626870        0.000000000000405        0.000000000009791        0.000004968129923        0.000042025775555        0.000169024339107        0.000010600347993        0.000112033387032        0.000011928196417        0.000065665619278        0.003319644084478        0.000001008089914        0.000010305394773        0.000000000000064        0.000037995952777        0.014876658421696        0.229777788963500        0.028780267920092        0.000059184817915        0.000601573382312        0.000010600347993        0.000000791883658        0.000000014273829        0.000000000077519        0.000000000000000        0.000039974796970        0.000114243453353        0.000001214192086        0.000000000002474        0.000058442465759        0.000012675280135        0.000000000028518        0.000000001461892        0.000000004731664        0.000000000972606        0.000000000045396        0.000000000177392        0.000000000008999        0.000000000000000        0.000000001667700        0.000000000116049        0.000000002637840        0.000000000203685        0.000000000001933        0.000000000317706        0.000000000001901        0.000000000412309        0.000000000019414        0.000000000000000        0.000644313827640        0.001577749836372        0.000000006709224        0.000001214222570        0.000000001149944        0.000000010466387        0.000000018160956        0.000000011281174        0.000000067382327        0.000000000065959        0.000000093011760        0.000000000684779        0.000000000176895      -30.429630405413398        1.658630488238899        3.155407701467931     -100.857988949258070        0.000349577461254     8937.559446624827600  4965755.661303619900000   975443.086138867660000      349.577461253749730      371.111929669920470    96972.341544129653000    34073.647898078721000       32.507864149208096       24.401558480460690       25.907016293762045    -3072.788463387958500    16888.899798330993000     3326.038255623127500      275.547602021308990        6.263758942835083       90.343098402776448    26287.974128051537000     2320.060722073997600     8300.742499464213300        0.000000000060622        0.000000000139229                      0.0        1.748967693559958        1.545951072583725                      0.0        0.226843074158908                      0.0        0.446451771748335        0.000001800000000        0.000000600000000
      200.545634592596510        0.000000000000478        0.000000000010537        0.000006195404559        0.000051516457878        0.000198026071774        0.000012460777129        0.000132509690995        0.000014039699484        0.000077225889070        0.003884557356992        0.000001211345596        0.000012240700419        0.000000000000145        0.000044740363102        0.017405638017712        0.268693360809671        0.033669146542962        0.000071886689758        0.000704203233802        0.000012460777129        0.000000957466014        0.000000032218878        0.000000000114405        0.000000000000000        0.000047278638578        0.000133762655250        0.000001442527510        0.000000000007234        0.000068558308953        0.000014945564617        0.000000000064435        0.000000003296380        0.000000010674320        0.000000002193792        0.000000000102495        0.000000000400902        0.000000000020339        0.000000000000000        0.000000003764837        0.000000000262382        0.000000005954336        0.000000000460078        0.000000000004365        0.000000000717886        0.000000000004293        0.000000000931544        0.000000000043797        0.000000000000000        0.000754646767924        0.001847799598645        0.000000015141461        0.000001495369349        0.000000002593741        0.000000023607578        0.000000033127138        0.000000025449785        0.000000146431066        0.000000000148970        0.000000103521024        0.000000000678274        0.000000000165658      -32.237904032989157        1.818588377127630        3.102163142590337     -206.343914564911420        0.000387556989279     9008.783983328570700  4965978.498773152000000   994473.982749291700000      387.556989279074860      412.535580221597740    95984.281187041983000    32989.051999268333000       42.872044856632670       31.272488778639538       33.290695586831703    -3259.687224612238900    17330.344066722595000     3305.208904189249100      275.609428862844080        6.000000000000000       75.147856983913726    25709.061946907754000     2433.281759235084300     8521.420190820477700        0.000000000058562        0.000000000002341                      0.0        0.807041847362715        1.730109318652645                      0.0        0.156755358301062                      0.0        0.522643701812878        0.000001800000000        0.000000600000000
      200.546446034507060        0.000000000000562        0.000000000010408        0.000006787852075        0.000056242829635        0.000213928414401        0.000013465291257        0.000143708524418        0.000015172738603        0.000083496957471        0.004197937588980        0.000001315943104        0.000013257741257        0.000000000000173        0.000048381894494        0.018804273554947        0.290457275927370        0.036380879994633        0.000078171196150        0.000761140623483        0.000013465291257        0.000001041740089        0.000000038550048        0.000000000128464        0.000000000000000        0.000051161719805        0.000144591284301        0.000001563945451        0.000000000008699        0.000074117297742        0.000016182174764        0.000000000077201        0.000000003946664        0.000000012768876        0.000000002626840        0.000000000122665        0.000000000480301        0.000000000024367        0.000000000000000        0.000000004509817        0.000000000314286        0.000000007131903        0.000000000551129        0.000000000005228        0.000000000860013        0.000000000005144        0.000000001114851        0.000000000052468        0.000000000000000        0.000815635274336        0.001997014279192        0.000000018125598        0.000001630611999        0.000000003105513        0.000000028267803        0.000000038622672        0.000000030472915        0.000000174623098        0.000000000178524        0.000000104217355        0.000000000774979        0.000000000169160      -32.968713797840273        1.814641614174945        3.151053599655362     -123.266399672941230        0.000416183774330     8792.408796757896200  4966510.289506199800000  1014078.017166823100000      416.183774329921620      442.686149479278640    95438.596695889748000    32602.758615512623000       48.558579124232914       35.297072719588826       37.545065745458032    -3342.713620373704500    18310.598954088167000     3282.414166069625000      275.673037843081260        6.000000000000000       70.799365313121768    25746.435345495916000     2437.081528645039300     8601.166933138427300        0.000000000061040       -0.000000000154079                      0.0        1.213163403661143        1.576957089710799                      0.0        0.276114195914013                      0.0        0.481999975329178        0.000001800000000        0.000000600000000
      200.547257476417490        0.000000000000568        0.000000000009412        0.000007048404458        0.000058466222912        0.000222769734694        0.000014010159664        0.000149624228477        0.000015783992886        0.000086855354538        0.004371169806078        0.000001366662792        0.000013780651468        0.000000000000177        0.000050329113137        0.019586942638232        0.302554007623273        0.037898769190028        0.000081048360358        0.000792614601878        0.000014010159664        0.000001081835091        0.000000039382601        0.000000000131537        0.000000000000000        0.000053184343665        0.000150558654707        0.000001624563774        0.000000000008655        0.000077146050885        0.000016832108750        0.000000000078968        0.000000004033755        0.000000013063118        0.000000002684530        0.000000000125490        0.000000000491116        0.000000000024920        0.000000000000000        0.000000004611558        0.000000000321489        0.000000007291808        0.000000000563642        0.000000000005347        0.000000000879518        0.000000000005260        0.000000001139953        0.000000000053677        0.000000000000000        0.000849208430104        0.002078933510299        0.000000018514505        0.000001691998311        0.000000003173472        0.000000028881685        0.000000039565098        0.000000031128087        0.000000178547356        0.000000000182523        0.000000091895960        0.000000000660017        0.000000000178695      -33.000249835922375        1.598487576806259        3.199245232695382     -131.723182602148740        0.000350302483705     8160.545135713538000  4967978.959868624800000  1034490.386908964300000      350.302483704504200      371.315231682786360    95218.146158562959000    32561.007887832224000       40.396427539409203       29.763501868822797       31.548855297356113    -3349.799058888330400    18867.074438382529000     3256.913629800953500      275.712955677253660        6.593981778698777       77.659136538029017    25418.565653257767000     2627.592796018726900     8609.871325382235200        0.000000000062839       -0.000000000328504                      0.0        2.489751675427026        1.052483639365784                      0.0                      0.0                      0.0        0.440199859590067        0.000001800000000        0.000000600000000
      200.548079352435450        0.000000000000514        0.000000000008772        0.000006354826194        0.000052762336807        0.000201476779124        0.000012656651350        0.000135261897768        0.000014262079828        0.000078451659924        0.003952831823218        0.000001232678348        0.000012433173584        0.000000000000157        0.000045456171344        0.017708776580235        0.273663809266186        0.034279446561323        0.000072952370262        0.000716725269520        0.000012656651350        0.000000975477403        0.000000034881856        0.000000000116781        0.000000000000000        0.000048009182814        0.000136144634585        0.000001465601602        0.000000000007450        0.000069733090424        0.000015199467081        0.000000000070039        0.000000003574097        0.000000011578097        0.000000002378569        0.000000000111304        0.000000000435574        0.000000000022101        0.000000000000000        0.000000004089092        0.000000000285133        0.000000006465425        0.000000000499861        0.000000000004742        0.000000000779978        0.000000000004665        0.000000001011188        0.000000000047621        0.000000000000000        0.000767821379967        0.001879292696223        0.000000016404043        0.000001524030854        0.000000002811573        0.000000025588671        0.000000035155409        0.000000027581228        0.000000158349476        0.000000000161887        0.000000071408224        0.000000000602933        0.000000000096588      -32.883318676189546        1.456299849371080        3.211974961723732     -184.089213120330240        0.000291626953417     7946.809880937812500  4970802.272417007900000  1055363.527415992200000      291.626953417390380      308.150541290560400    95155.656252474902000    32574.834512838326000       32.791646953393609       24.517030738194723       25.905891251871701    -3346.233804728419700    18942.742874894324000     3252.052736659308700      275.750112376045880        6.982727400023796       83.080308153475769    24706.255600152232000     2875.462592288609400     8606.972710756725100        0.000000000041804       -0.000000000759891                      0.0        3.260877249689687        0.646381651692526                      0.0                      0.0                      0.0        0.435720324785548        0.000001800000000        0.000000600000000
      200.548912431012130        0.000000000000503        0.000000000008083        0.000006110805434        0.000050791313951        0.000194366244102        0.000012194024918        0.000130477189010        0.000013741543256        0.000075595442624        0.003814249433416        0.000001185536567        0.000011965583468        0.000000000000148        0.000043803171905        0.017085355880988        0.264093160195935        0.033083074375682        0.000070018866572        0.000691557845676        0.000012194024918        0.000000938517173        0.000000032889791        0.000000000110313        0.000000000000000        0.000046215882282        0.000131336384947        0.000001410007682        0.000000000006803        0.000067243871624        0.000014640948012        0.000000000066135        0.000000003371986        0.000000010920929        0.000000002244050        0.000000000105020        0.000000000411261        0.000000000020864        0.000000000000000        0.000000003859686        0.000000000269213        0.000000006102936        0.000000000471861        0.000000000004476        0.000000000736338        0.000000000004404        0.000000000954556        0.000000000044971        0.000000000000000        0.000740728735355        0.001813577117539        0.000000015473253        0.000001463961195        0.000000002652031        0.000000024133257        0.000000033261495        0.000000026015112        0.000000149465405        0.000000000152846        0.000000066173306        0.000000000540305        0.000000000066349      -32.914630410501260        1.462148099879121        3.223119723493588     -166.294436120690530        0.000299282569537     8214.522131589998000  4973428.952976904800000  1076746.749771877900000      299.282569537063180      316.228401391832560    95156.969064451623000    32596.545828554503000       33.780621542097450       25.246524031460421       26.675909327124909    -3350.000000000000000    19079.283421303608000     3248.633120999347700      276.060708917403020        7.000000000000000       83.001089820715237    25129.996852789620000     2801.981091349461200     8602.459784592914700        0.000000000070075       -0.000000001017739                      0.0        2.934747880437221        0.661808717384108                      0.0                      0.0                      0.0        0.466262409058493        0.000001800000000        0.000000600000000
      200.549727754946100        0.000000000000470        0.000000000007619        0.000007006599723        0.000058304387012        0.000223473163690        0.000014019301229        0.000149965193460        0.000015784911493        0.000086843700765        0.004387253761123        0.000001359019068        0.000013739973766        0.000000000000167        0.000050317837750        0.019651763770054        0.303874578118032        0.038066497423875        0.000080153691923        0.000795480147779        0.000014019301229        0.000001076632442        0.000000037013676        0.000000000124501        0.000000000000000        0.000053055748098        0.000151059697205        0.000001617495494        0.000000000007428        0.000077310405810        0.000016814853828        0.000000000074529        0.000000003796066        0.000000012298712        0.000000002526299        0.000000000118294        0.000000000463418        0.000000000023516        0.000000000000000        0.000000004348822        0.000000000303459        0.000000006875170        0.000000000531662        0.000000000005044        0.000000000829726        0.000000000004963        0.000000001075665        0.000000000050696        0.000000000000000        0.000851829965799        0.002085531992988        0.000000017424834        0.000001677235137        0.000000002985023        0.000000027177355        0.000000037557757        0.000000029286577        0.000000168365507        0.000000000172227        0.000000067895730        0.000000000522954        0.000000000061615      -32.855434348545408        1.489212516449971        3.229003367061656     -260.046424117324820        0.000315014791687     8755.005481584672500  4975195.773803613100000  1097894.878856022400000      315.014791687336130      333.030997951988750    95166.238252118506000    32604.840715465223000       35.443646377047912       26.432734410439632       27.945203548073422    -3350.000000000000000    19111.080786467443000     3222.726874548576200      275.937360247370800        6.891849311760236       82.115452074156323    25073.802674275506000     2807.495847312821300     8600.731873871702200        0.000000000084709       -0.000000000960210                      0.0        3.343883645327793        0.674350985397692                      0.0                      0.0                      0.0        0.451478076636780        0.000001800000000        0.000000600000000
      200.550528474030670        0.000000000000710        0.000000000009829        0.000005108764235        0.000042558471450        0.000163442725831        0.000010242367958        0.000109640635184        0.000011531613677        0.000063432416942        0.003207744872876        0.000000991271864        0.000010025907833        0.000000000000120        0.000036745447608        0.014375972520945        0.222277425635050        0.027843424041984        0.000058347125059        0.000581678473953        0.000010242367958        0.000000785208011        0.000000026540931        0.000000000089459        0.000000000000000        0.000038727017687        0.000110435959231        0.000001179741990        0.000000000005184        0.000056505342146        0.000012278389840        0.000000000053502        0.000000002723425        0.000000008823123        0.000000001812277        0.000000000084951        0.000000000332679        0.000000000016869        0.000000000000000        0.000000003121398        0.000000000217821        0.000000004934654        0.000000000381744        0.000000000003620        0.000000000595654        0.000000000003563        0.000000000771693        0.000000000036405        0.000000000000000        0.000622688477355        0.001524518579108        0.000000012503033        0.000001222171967        0.000000002141408        0.000000019499746        0.000000027008701        0.000000020998444        0.000000120846477        0.000000000123597        0.000000073089668        0.000000000542107        0.000000000077384      -32.717959984290694        1.739522299276319        3.233596873100030     -228.801055243116560        0.000439412703986     9062.942709028133300  4975638.638904405800000  1118794.968215888100000      439.412703986112720      466.442662047373690    95197.187367727442000    32604.715553404658000       49.437945854444671       36.262921709314305       38.492486646928235    -3333.785703187470500    19086.956235512051000     3215.426829985212000      275.704918032786910        6.351221319866599       76.548863292746177    25448.825374565389000     2815.995995072592500     8600.744953655112100        0.000000000095945                      0.0                      0.0                      0.0        0.882529618800312                      0.0                      0.0                      0.0        0.446694522793601        0.000001800000000        0.000000600000000
      200.551329193115240        0.000000000000600        0.000000000008424        0.000004673973287        0.000038989933179        0.000150047281660        0.000009394833886        0.000100629894465        0.000010577927694        0.000058160649098        0.002945407060695        0.000000907233119        0.000009177921149        0.000000000000107        0.000033692377445        0.013196159873325        0.204153041463227        0.025568105458236        0.000053299137195        0.000533979400331        0.000009394833886        0.000000718809309        0.000000023795842        0.000000000080418        0.000000000000000        0.000035478440329        0.000101414248469        0.000001080452494        0.000000000004499        0.000051851924295        0.000011253432597        0.000000000048053        0.000000002443376        0.000000007915285        0.000000001626173        0.000000000076242        0.000000000298729        0.000000000015163        0.000000000000000        0.000000002802115        0.000000000195687        0.000000004430546        0.000000000342732        0.000000000003251        0.000000000534888        0.000000000003199        0.000000000693044        0.000000000032705        0.000000000000000        0.000571665752785        0.001399280949761        0.000000011218791        0.000001116664621        0.000000001920650        0.000000017490723        0.000000024313217        0.000000018843390        0.000000108492690        0.000000000111011        0.000000079546322        0.000000000613472        0.000000000117642      -32.418743266938144        1.792793674681638        3.255732939723063     -138.257005869133450        0.000480827513371     8601.653259415665200  4976468.229395899000000  1139785.559983960800000      480.827513370867390      510.504265759656730    95230.785716311002000    32601.734238921505000       52.736527969533597       38.705194667908010       41.095094866138282    -3298.783522259225700    19163.708635326879000     3212.250171508500900      275.696360579103040        6.196821434728856       77.037896057771476    25634.253844316281000     2899.170442041931400     8601.371108472905700        0.000000000106207                      0.0                      0.0                      0.0                      0.0                      0.0                      0.0                      0.0                      0.0        0.000001800000000        0.000000600000000
      200.552129912199800        0.000000000000506        0.000000000007823        0.000005431085425        0.000045342544506        0.000174802126025        0.000010940314421        0.000117367715804        0.000012330561603        0.000067710988730        0.003433429335297        0.000001053807793        0.000010663960041        0.000000000000122        0.000039227638320        0.015372891585555        0.237969102202893        0.029808259157278        0.000061815689037        0.000622449843110        0.000010940314421        0.000000835575419        0.000000027142793        0.000000000091950        0.000000000000000        0.000041266287782        0.000118330622439        0.000001255316502        0.000000000004980        0.000060408336002        0.000013098802510        0.000000000054883        0.000000002788386        0.000000009033959        0.000000001855147        0.000000000087054        0.000000000341198        0.000000000017319        0.000000000000000        0.000000003199784        0.000000000223494        0.000000005058304        0.000000000391393        0.000000000003713        0.000000000610840        0.000000000003654        0.000000000791437        0.000000000037367        0.000000000000000        0.000666246862193        0.001630412237449        0.000000012801418        0.000001296041720        0.000000002191508        0.000000019951739        0.000000027824717        0.000000021501530        0.000000123827741        0.000000000126766        0.000000077522099        0.000000000534587        0.000000000117408      -32.483010153519231        1.645934115795853        3.272824267121699      -74.111362243173403        0.000419493275765     8432.802729388280600  4977978.926319255500000  1160889.534535705100000      419.493275764782880      444.415726758188440    95263.904619683701000    32604.453533103868000       45.860166320045764       33.941033337485727       35.957470217586945    -3302.533747963293500    19379.308620256037000     3196.151387133549600      275.742306388151180        6.204947426768714       76.678815128692946    25912.900600579967000     2803.756748018638500     8600.806704525470200        0.000000000044816                      0.0                      0.0                      0.0                      0.0                      0.0                      0.0                      0.0                      0.0        0.000001800000000        0.000000600000000
      200.552930631284370        0.000000000000592        0.000000000009220        0.000005600570872        0.000046811457944        0.000180900372385        0.000011304477753        0.000121289119451        0.000012727532882        0.000069965768860        0.003552019925448        0.000001087900276        0.000011013064732        0.000000000000124        0.000040533158693        0.015910775833126        0.246281337263641        0.030850565296135        0.000063629311060        0.000644035771031        0.000011304477753        0.000000862024876        0.000000027430735        0.000000000093176        0.000000000000000        0.000042613538880        0.000122265960669        0.000001296286993        0.000000000004873        0.000062474536822        0.000013535833912        0.000000000055560        0.000000002819355        0.000000009136866        0.000000001876193        0.000000000088080        0.000000000345333        0.000000000017526        0.000000000000000        0.000000003238085        0.000000000226257        0.000000005118637        0.000000000396150        0.000000000003757        0.000000000618230        0.000000000003698        0.000000000800847        0.000000000037828        0.000000000000000        0.000689191646914        0.001686830918217        0.000000012941350        0.000001336352047        0.000000002215694        0.000000020177156        0.000000028229044        0.000000021736328        0.000000125328405        0.000000000128289        0.000000071988095        0.000000000536326        0.000000000094811      -32.764018502199370        1.860541831113245        3.271263893101820     -160.203265409239920        0.000526196694903     8495.978472977749300  4979508.518648780000000  1182076.725746369700000      526.196694903355590      558.909588543902260    95279.971030920395000    32600.549872661042000       60.001311761545722       43.771566487919088       46.492496287749567    -3332.335871363667100    19511.335509713019000     3133.655903176988900      275.809357599813720        6.049977770802200       72.791525951723344    25570.029247007853000     2718.576616196231000     8601.605292140377100        0.000000000101972                      0.0                      0.0                      0.0                      0.0                      0.0                      0.0                      0.0                      0.0        0.000001800000000        0.000000600000000
      200.553731350368930        0.000000000000452        0.000000000007694        0.000005810286833        0.000048620596572        0.000188273591294        0.000011752225754        0.000126132875487        0.000013224762959        0.000072731953199        0.003697024127210        0.000001128881402        0.000011440242773        0.000000000000126        0.000042133102241        0.016559536929341        0.256419382810470        0.032118304943656        0.000065888230860        0.000670384522600        0.000011752225754        0.000000894732413        0.000000027894665        0.000000000094995        0.000000000000000        0.000044261536980        0.000127184086099        0.000001345740513        0.000000000004798        0.000064995177025        0.000014072100914        0.000000000056586        0.000000002868754        0.000000009297351        0.000000001909350        0.000000000089666        0.000000000351637        0.000000000017852        0.000000000000000        0.000000003296609        0.000000000230417        0.000000005210800        0.000000000403334        0.000000000003825        0.000000000629539        0.000000000003766        0.000000000815352        0.000000000038534        0.000000000000000        0.000717238428745        0.001755405300995        0.000000013165822        0.000001385382190        0.000000002254126        0.000000020530396        0.000000028815642        0.000000022113495        0.000000127613102        0.000000000130680        0.000000066453274        0.000000000555583        0.000000000059768      -32.831226479567150        1.549525720862076        3.262686520197215     -204.722729735261790        0.000362565385987     8444.077724505972600  4981216.306398672100000  1203191.027241671700000      362.565385987141670      383.547117969461740    95275.381910734577000    32604.940718116028000       40.865602124821542       30.351655311237820       32.107771710330994    -3349.132510162089100    19456.164808371028000     3064.986815224376600      276.168218073944050        6.926882999376067       82.744024623926180    24992.393593784644000     2724.534009885092000     8600.694915086023700        0.000000000063001                      0.0                      0.0                      0.0                      0.0                      0.0                      0.0                      0.0                      0.0        0.000001800000000        0.000000600000000
      200.554532069453500        0.000000000000485        0.000000000007436        0.000005787579603        0.000048487039564        0.000188160608314        0.000011740573705        0.000126132384188        0.000013214900950        0.000072603680336        0.003695995959901        0.000001124498136        0.000011417630614        0.000000000000123        0.000042051376163        0.016559727727757        0.256434347626790        0.032114003856377        0.000065511614008        0.000670111193490        0.000011740573705        0.000000891784018        0.000000027214900        0.000000000092938        0.000000000000000        0.000044143256732        0.000127214351401        0.000001341548862        0.000000000004525        0.000064933552060        0.000014037356849        0.000000000055294        0.000000002800508        0.000000009076799        0.000000001863419        0.000000000087581        0.000000000343600        0.000000000017437        0.000000000000000        0.000000003220469        0.000000000225135        0.000000005089896        0.000000000394017        0.000000000003738        0.000000000615114        0.000000000003679        0.000000000796483        0.000000000037667        0.000000000000000        0.000716784097542        0.001754827550505        0.000000012848670        0.000001378766614        0.000000002199718        0.000000020040241        0.000000028230629        0.000000021582941        0.000000124590316        0.000000000127629        0.000000067267274        0.000000000451586        0.000000000067300      -32.817536734594668        1.476605838865414        3.254895517912140      156.157520535700370        0.000321926832675     7171.684625759765400  4983559.282301572200000  1223862.007235030200000      321.926832675298840      340.072838585859810    95261.289961378337000    32612.254898822870000       35.992598976332523       26.918435224574033       28.436451208337779    -3347.456967999064500    19366.343900765165000     3076.162443863560400      276.056937058035830        7.000000000000000       83.761377176253049    25616.371593965290000     2780.954494736234700     8599.183818207806300        0.000000000089051       -0.000000000213427                      0.0        1.435011193329710        0.672724403708686                      0.0                      0.0                      0.0        0.436205079953316        0.000001800000000        0.000000600000000
      200.555332788538040        0.000000000000506        0.000000000008249        0.000005410672579        0.000045384490634        0.000176581231577        0.000011005271994        0.000118243427821        0.000012376516939        0.000068007193599        0.003467294612197        0.000001051391622        0.000010684612461        0.000000000000113        0.000039396219514        0.015535381297698        0.240644207391910        0.030137247867960        0.000061129878771        0.000628658178457        0.000011005271994        0.000000834187252        0.000000024914753        0.000000000085330        0.000000000000000        0.000041317024521        0.000119351599243        0.000001254473643        0.000000000004005        0.000060881787280        0.000013148686037        0.000000000050706        0.000000002565185        0.000000008315570        0.000000001707412        0.000000000080281        0.000000000315038        0.000000000015994        0.000000000000000        0.000000002952558        0.000000000206475        0.000000004666265        0.000000000361271        0.000000000003427        0.000000000563988        0.000000000003374        0.000000000730195        0.000000000034552        0.000000000000000        0.000672336320673        0.001646002838623        0.000000011773377        0.000001287427625        0.000000002015239        0.000000018351610        0.000000025951806        0.000000019773022        0.000000114300582        0.000000000117042        0.000000074773474        0.000000000452702        0.000000000070045      -32.626362788901048        1.515325036828035        3.236854445171564     1096.576847936006500        0.000332268321439     7138.676032743062000  4991996.820279983800000  1237281.851159127200000      332.268321438520670      351.422234677473570    95261.107192497002000    32641.078083270982000       36.603136442672209       27.298942213020709       28.872738726370564    -3309.557990648552300    19072.365524640638000     3100.001647375115700      275.895923002468810        6.911560862334296       84.028061278035750    25092.258741030982000     3549.272747002757600     8593.176312855181100        0.000000000060866       -0.000000000166152                      0.0        1.337265157014092        0.678854032480286                      0.0                      0.0                      0.0        0.430454126747669        0.000001800000000        0.000000600000000
      200.556133507622600        0.000000000000466        0.000000000008017        0.000005430079809        0.000045585165173        0.000177780448883        0.000011069624812        0.000119005545620        0.000012438477967        0.000068396657275        0.003490767415144        0.000001055509943        0.000010728531267        0.000000000000111        0.000039611282656        0.015641868680287        0.242282132737848        0.030355212353120        0.000061231947018        0.000633006992749        0.000011069624812        0.000000837610356        0.000000024496615        0.000000000084136        0.000000000000000        0.000041517731485        0.000120104998709        0.000001259159244        0.000000000003809        0.000061275888538        0.000013223724564        0.000000000049933        0.000000002524263        0.000000008182176        0.000000001679519        0.000000000079023        0.000000000310293        0.000000000015746        0.000000000000000        0.000000002906252        0.000000000203306        0.000000004593378        0.000000000355757        0.000000000003373        0.000000000555328        0.000000000003321        0.000000000718761        0.000000000034024        0.000000000000000        0.000676892266470        0.001656853585697        0.000000011581859        0.000001291596412        0.000000001981607        0.000000018053445        0.000000025621426        0.000000019451587        0.000000112521327        0.000000000115285        0.000000073378184        0.000000000468798        0.000000000072399      -32.728523079783244        1.547008825829733        3.235996861238482      991.158231856584050        0.000346947365657    31753.934914415750000  5004764.501171781700000  1239917.856994062400000      346.947365657399420      367.191469380002050    95272.830134681892000    32614.880427520107000       38.691693308726613       28.747000053200502       30.423793978318372    -3330.970934339411500    19118.499262918165000     3097.112454806950600      275.905070172870130        6.690992109803432       80.722309164700690    23978.469560418547000     3274.027267237362100     8598.635932149971300        0.000000000100916       -0.000000000143013                      0.0        1.390232187588448        0.545805638878114                      0.0                      0.0                      0.0        0.419189621565870        0.000001800000000        0.000000600000000
      200.556934226707170        0.000000000000413        0.000000000007833        0.000006097369743        0.000051248737948        0.000200179181504        0.000012453163002        0.000133877609765        0.000013995445193        0.000076932616820        0.003931065216843        0.000001184949127        0.000012053122271        0.000000000000122        0.000044559051876        0.017621255206930        0.273042963501016        0.034187707437509        0.000068644284970        0.000712902212527        0.000012453163002        0.000000941017130        0.000000027038356        0.000000000093062        0.000000000000000        0.000046669321713        0.000135269945915        0.000001415390835        0.000000000004088        0.000068971914892        0.000014871780939        0.000000000055179        0.000000002786551        0.000000009034672        0.000000001854797        0.000000000087301        0.000000000342718        0.000000000017401        0.000000000000000        0.000000003211088        0.000000000224679        0.000000005074181        0.000000000393039        0.000000000003727        0.000000000613631        0.000000000003670        0.000000000794178        0.000000000037615        0.000000000000000        0.000762098872951        0.001865946381181        0.000000012784500        0.000001448430173        0.000000002187318        0.000000019934600        0.000000028375318        0.000000021461132        0.000000124243771        0.000000000127481        0.000000068158031        0.000000000450412        0.000000000064551      -32.805995133196141        1.431144779328776        3.236391260502050     1115.155865779817500        0.000290908219775    33402.479380148165000  5016798.412525452700000  1237806.459656860200000      290.908219774536750      307.054430071663940    95281.399974385189000    32606.402535860594000       32.334070184417840       24.293899846305681       25.642195184420025    -3349.558145491789700    19164.253586065301000     3083.528432377362600      275.993852459020730        7.000000000000000       83.848872950825083    24241.039959020713000     3306.287909843383700     8600.392548566613200        0.000000000070670       -0.000000000129177                      0.0        1.221705655164062        0.569525778285641                      0.0                      0.0                      0.0        0.455292487120660        0.000001800000000        0.000000600000000
      200.557734945791740        0.000000000000518        0.000000000007704        0.000006489855346        0.000054588353016        0.000213566399558        0.000013283904211        0.000142848557884        0.000014924807745        0.000082010603681        0.004194120214554        0.000001261082149        0.000012841307951        0.000000000000128        0.000047500545980        0.018797109285764        0.291346376168341        0.036490993264571        0.000072976350942        0.000760575534130        0.000013283904211        0.000001001912395        0.000000028378273        0.000000000097838        0.000000000000000        0.000049712205129        0.000144238828582        0.000001507066935        0.000000000004193        0.000073563860325        0.000015852292678        0.000000000057973        0.000000002925691        0.000000009486338        0.000000001946745        0.000000000091693        0.000000000360106        0.000000000018280        0.000000000000000        0.000000003373138        0.000000000236065        0.000000005329555        0.000000000412820        0.000000000003915        0.000000000644554        0.000000000003856        0.000000000834147        0.000000000039523        0.000000000000000        0.000813048141434        0.001990262166745        0.000000013425269        0.000001541263122        0.000000002297276        0.000000020927670        0.000000029863188        0.000000022537082        0.000000130538253        0.000000000133853        0.000000072990923        0.000000000445613        0.000000000075536      -32.775060581780821        1.727824241880065        3.234381923502447     1131.025370547345600        0.000431912053868    32375.341375913205000  5027767.969580980000000  1230533.048019305600000      431.912053867567120      458.408415021327760    95282.844435115956000    32611.557667445926000       48.953327230423213       35.909515268223721       38.111960331653989    -3343.171319138907200    19125.873962944104000     3072.729276981579900      275.774416949409500        6.600034406707422       79.262754362949622    24001.666995600262000     3270.581390091818800     8599.318601516390100        0.000000000081967       -0.000000000060132                      0.0                      0.0        1.493088784227171        0.533465050069576        0.129728963584564                      0.0        0.479865844154435        0.000001800000000        0.000000600000000
      200.558535664876300                      0.0                      0.0        0.000006308918475        0.000053110148797        0.000208019509467        0.000012924973414        0.000139129714584        0.000014524961473        0.000079830096706        0.004085634896848        0.000001226209208        0.000012491061789        0.000000000000123        0.000046236545483        0.018311787012268        0.283898415192044        0.035555331700565        0.000070851743667        0.000740958615376        0.000012924973414        0.000000974553220        0.000000027219674        0.000000000094034        0.000000000000000        0.000048367070948        0.000140522798968        0.000001464568670        0.000000000003936        0.000071636821261        0.000015423310187        0.000000000055659        0.000000002807103        0.000000009104232        0.000000001867960        0.000000000088017        0.000000000345708        0.000000000017556        0.000000000000000        0.000000003238289        0.000000000226674        0.000000005116086        0.000000000396313        0.000000000003759        0.000000000618872        0.000000000003702        0.000000000800827        0.000000000037959        0.000000000000000        0.000791952394612        0.001938939856242        0.000000012884194        0.000001497512324        0.000000002203738        0.000000020079552        0.000000028713739        0.000000021628636        0.000000125334101        0.000000000128503        0.000000081755447        0.000000000661340        0.000000000174817      -32.814484597554909        2.342113004260167        3.230189543938207      921.714214927149670        0.000724079682121    31211.201556614375000  5037580.971370040400000  1220813.279002626400000      724.079682121166340      772.016872308712320    95284.960512337086000    32606.886605110729000       84.272042097064684       60.550167241361294       64.559383492881238    -3343.903964093189600    19101.848779520009000     3073.695082859539500      275.781082296846020        6.088785566714345       72.903174917254574    23795.009917842897000     2789.493541193637600     8600.298262661979600        0.000000000151223       -0.000000000013681        6.310411624473814                      0.0        1.916238652794681        0.654898994504611        0.183129828486863                      0.0        0.468404647364153        0.000001800000000        0.000000600000000
      200.559337212707790        0.000000000001175        0.000000000011745        0.000006339199937        0.000053395590566        0.000209384882093        0.000013003886817        0.000140050518745        0.000014614508510        0.000080302510484        0.004112770123330        0.000001232162165        0.000012555858163        0.000000000000123        0.000046509031213        0.018432879406301        0.285804192217323        0.035795633054774        0.000071114312955        0.000745842478296        0.000013003886817        0.000000979376531        0.000000027055682        0.000000000093624        0.000000000000000        0.000048632767660        0.000141422825055        0.000001472434458        0.000000000003845        0.000072093962269        0.000015515768425        0.000000000055380        0.000000002791490        0.000000009053105        0.000000001857918        0.000000000087547        0.000000000343928        0.000000000017465        0.000000000000000        0.000000003220992        0.000000000225530        0.000000005088687        0.000000000394288        0.000000000003740        0.000000000615668        0.000000000003683        0.000000000796551        0.000000000037768        0.000000000000000        0.000797131321770        0.001951870783656        0.000000012810770        0.000001503340840        0.000000002191429        0.000000019966833        0.000000028606731        0.000000021501367        0.000000124690142        0.000000000127851        0.000000078860671        0.000000000714508        0.000000000236965      -32.565682192158889        2.200291434280426        3.245140418896010      720.678586154310550        0.000672723359879    29931.120710663523000  5045267.640551602500000  1207850.467422581300000      672.723359879481680      716.595106897174220    95280.416954080065000    32618.688864528642000       76.150991884683208       55.022339155591744       58.611360646287210    -3319.682859657583800    19129.431692613707000     3058.182007232585400      275.859967941901230        6.000000000000000       73.526483066345889    24116.130041316403000     2280.335305080399400     8597.832757082653200        0.000000000267975       -0.000000000036189                      0.0                      0.0        1.561479538799911        0.550520764992090        0.201074721304723                      0.0        0.423403723467836        0.000001800000000        0.000000600000000
      200.560153970644960        0.000000000000706        0.000000000008448        0.000006557685019        0.000055256868383        0.000216899453255        0.000013465846869        0.000144993585723        0.000015129133897        0.000083131109360        0.004260249777689        0.000001275345608        0.000012989102247        0.000000000000126        0.000048146914910        0.019093908842747        0.296057704944123        0.037083661900363        0.000073505484703        0.000772588616575        0.000013465846869        0.000001013194511        0.000000027751097        0.000000000096143        0.000000000000000        0.000050328463569        0.000146504070893        0.000001523485246        0.000000000003889        0.000074662596330        0.000016058947504        0.000000000056836        0.000000002863497        0.000000009287320        0.000000001905971        0.000000000089833        0.000000000352979        0.000000000017927        0.000000000000000        0.000000003305179        0.000000000231412        0.000000005221729        0.000000000404639        0.000000000003837        0.000000000631800        0.000000000003780        0.000000000817442        0.000000000038763        0.000000000000000        0.000825593976193        0.002021083654113        0.000000013147127        0.000001554922543        0.000000002248423        0.000000020479116        0.000000029395398        0.000000022053420        0.000000127890631        0.000000000131145        0.000000080178275        0.000000000532484        0.000000000229063      -32.585826326856946        1.524868570956813        3.249756522966953      764.374757313489340        0.000344804453169    27587.818626323424000  5050468.794746443600000  1192574.601782639300000      344.804453168891430      364.673002293349900    95268.333233377911000    32628.328221877367000       37.703449190247284       28.130407345684464       29.749974015192386    -3319.290198778440800    19189.445766177818000     3045.552784145981600      275.788636204949850        7.009104987050585       85.670357858833299    23527.534872956745000     2731.774389653936400     8595.822512817254400        0.000000000121799        0.000000000014550                      0.0                      0.0                      0.0                      0.0                      0.0                      0.0                      0.0        0.000001800000000        0.000000600000000
      200.560956468968950        0.000000000000683        0.000000000007581        0.000006793321034        0.000057264972130        0.000224954779375        0.000013959445833        0.000150395751505        0.000015689814043        0.000086181735511        0.004418960692051        0.000001321480131        0.000013460508117        0.000000000000130        0.000049915045941        0.019800984187613        0.307109704598224        0.038459158029273        0.000076109847542        0.000801295854790        0.000013959445833        0.000001051043104        0.000000028593930        0.000000000099150        0.000000000000000        0.000052164218831        0.000151936735112        0.000001579058594        0.000000000003972        0.000077425546053        0.000016644970968        0.000000000058596        0.000000002951582        0.000000009572775        0.000000001964343        0.000000000092603        0.000000000363908        0.000000000018478        0.000000000000000        0.000000003407279        0.000000000238578        0.000000005382933        0.000000000417157        0.000000000003956        0.000000000651363        0.000000000003897        0.000000000842605        0.000000000039967        0.000000000000000        0.000856300446697        0.002095883902175        0.000000013552705        0.000001611112552        0.000000002316955        0.000000021112467        0.000000030332010        0.000000022727699        0.000000131779713        0.000000000135297        0.000000086186867        0.000000000372803        0.000000000112633      -32.752364923700277        1.391622654811162        3.249166795795380      547.792688098799090        0.000277239185241    25698.404507650408000  5049867.952838350100000  1176434.742951563600000      277.239185240652770      292.209460845351320    95244.985114435491000    32605.852769888632000       30.476027519816853       23.045046147373036       24.289632165388802    -3337.401454128532800    19271.332624328912000     3009.669287100956800      275.845538761017790        7.791477443507929       93.843806008809381    23260.998772512678000     2942.562329211430600     8600.507121712820700        0.000000000109234        0.000000000128954                      0.0                      0.0                      0.0                      0.0                      0.0                      0.0                      0.0        0.000001800000000        0.000000600000000
      200.561740234864910        0.000000000000644        0.000000000006259        0.000006999308093        0.000059010996783        0.000231895640554        0.000014389431032        0.000155054055888        0.000016169541414        0.000088825505535        0.004555147272322        0.000001361423466        0.000013874886376        0.000000000000133        0.000051446711846        0.020414996012841        0.316626499095398        0.039654590233764        0.000078388102567        0.000826095671767        0.000014389431032        0.000001082307178        0.000000029321932        0.000000000101686        0.000000000000000        0.000053754892479        0.000156638057199        0.000001627097534        0.000000000004042        0.000079812052337        0.000017158670200        0.000000000060096        0.000000003026168        0.000000009817249        0.000000002014290        0.000000000094971        0.000000000373213        0.000000000018950        0.000000000000000        0.000000003494280        0.000000000244742        0.000000005520311        0.000000000427831        0.000000000004058        0.000000000668020        0.000000000003996        0.000000000864144        0.000000000040993        0.000000000000000        0.000882710003547        0.002161068217621        0.000000013891916        0.000001659802251        0.000000002375886        0.000000021647396        0.000000031122327        0.000000023303327        0.000000135191688        0.000000000138696        0.000000092640785        0.000000000337124        0.000000000099729      -32.749046356999429        1.239752322843250        3.253849349315251      691.347155820249440        0.000204185293823    25688.164017974086000  5048546.963851164100000  1160666.933291725300000      204.185293822869510      213.764758211581210    95210.058587650870000    32611.208387526629000       21.741633178151673       16.958077047303735       17.753972966642618    -3333.203119930035000    19319.152026506152000     2976.310753446842200      275.787246542575870        9.742100589177191      117.309774278396650    22560.160160150648000     3211.336004015999600     8599.390068036957000        0.000000000186448        0.000000000064483                      0.0                      0.0                      0.0                      0.0                      0.0                      0.0                      0.0        0.000001800000000        0.000000600000000
      200.562538712286230        0.000000000000772        0.000000000007568        0.000007527089226        0.000063484627233        0.000249646761240        0.000015486700468        0.000166819306715        0.000017401639862        0.000095563196350        0.004903744705698        0.000001464398487        0.000014916208665        0.000000000000142        0.000055352821894        0.021975873591173        0.340917487248800        0.042687692314302        0.000084291083215        0.000889313539524        0.000015486700468        0.000001163877036        0.000000031384107        0.000000000108991        0.000000000000000        0.000057823498992        0.000168622585403        0.000001750326994        0.000000000004292        0.000085901521489        0.000018459128088        0.000000000064354        0.000000003240553        0.000000010510424        0.000000002156380        0.000000000101696        0.000000000399635        0.000000000020293        0.000000000000000        0.000000003741575        0.000000000262117        0.000000005911396        0.000000000458114        0.000000000004344        0.000000000715378        0.000000000004278        0.000000000925311        0.000000000043893        0.000000000000000        0.000950221571549        0.002326779731168        0.000000014876410        0.000001784748591        0.000000002543618        0.000000023170502        0.000000033345106        0.000000024955822        0.000000144845979        0.000000000148502        0.000000094903189        0.000000000331984        0.000000000099774      -32.960035891096894        1.325658487446372        3.240794095008313      739.174139551254140        0.000240502076997    25224.978547866183000  5047034.526299683400000  1144768.646946693500000      240.502076997440440      252.920399126026300    95177.900913110905000    32603.494888911555000       26.772497359645460       20.414115621256180       21.469348494723810    -3356.869652944546500    19292.314214023572000     2986.275074791418300      275.921415428457120        8.772719368577677      103.650795385909500    22106.551512591202000     3398.489074145202700     8600.994556220966800        0.000000000260751       -0.000000000040808                      0.0                      0.0                      0.0                      0.0                      0.0                      0.0                      0.0        0.000001800000000        0.000000600000000
      200.563327232242330        0.000000000000672        0.000000000009020        0.000007540236865        0.000063609909911        0.000250225151144        0.000015518698057        0.000167223365364        0.000017438122911        0.000095782026629        0.004914804725127        0.000001467092812        0.000014955034457        0.000000000000142        0.000055479251697        0.022028390198092        0.341661807977231        0.042789408320144        0.000084380694102        0.000891249289175        0.000015518698057        0.000001165793439        0.000000031292522        0.000000000108713        0.000000000000000        0.000057946983564        0.000169002544512        0.000001753591379        0.000000000004251        0.000086082226162        0.000018499507390        0.000000000064194        0.000000003231945        0.000000010486096        0.000000002150714        0.000000000101444        0.000000000398656        0.000000000020244        0.000000000000000        0.000000003732279        0.000000000261425        0.000000005896172        0.000000000456981        0.000000000004334        0.000000000713538        0.000000000004268        0.000000000923050        0.000000000043798        0.000000000000000        0.000952386376485        0.002332142200208        0.000000014831547        0.000001786796277        0.000000002536670        0.000000023115631        0.000000033287525        0.000000024887883        0.000000144437272        0.000000000148168        0.000000088657935        0.000000000405037        0.000000000109893      -33.328417217395625        1.404178113021901        3.210318253197690      647.405511962467700        0.000265503584412    24723.006115727276000  5044486.870941240300000  1129600.702118258200000      265.503584412381200      280.144871804367540    95174.773768252839000    32608.071950383797000       31.034848613874203       23.257369812100055       24.539067563067043    -3392.587636982949800    19163.536293894515000     2973.976944825916200      275.970873453461420        7.658783452493318       87.142624254550299    21858.374710418502000     3350.221912886957900     8600.059209506647700        0.000000000119396       -0.000000000057273                      0.0                      0.0        0.725867336558844                      0.0                      0.0                      0.0        0.283576958590164        0.000001800000000        0.000000600000000
      200.564122438385080        0.000000000000646        0.000000000008833        0.000006461595545        0.000054525261058        0.000214566513785        0.000013307770207        0.000143366849123        0.000014949522088        0.000082125854135        0.004214387370172        0.000001257155896        0.000012816267508        0.000000000000121        0.000047555706345        0.018891349079942        0.293001299263292        0.036693935888514        0.000072282800402        0.000764315620208        0.000013307770207        0.000000999469200        0.000000026696414        0.000000000092822        0.000000000000000        0.000049668880875        0.000144920376994        0.000001502700219        0.000000000003601        0.000073821181589        0.000015856686730        0.000000000054788        0.000000002757900        0.000000008946556        0.000000001835321        0.000000000086573        0.000000000340259        0.000000000017279        0.000000000000000        0.000000003185453        0.000000000223164        0.000000005032498        0.000000000390016        0.000000000003699        0.000000000609015        0.000000000003643        0.000000000787767        0.000000000037379        0.000000000000000        0.000816638366307        0.001999117117473        0.000000012658513        0.000001531600370        0.000000002164984        0.000000019722365        0.000000028422204        0.000000021237449        0.000000123260652        0.000000000126450        0.000000090223214        0.000000000422854        0.000000000091515      -33.361773627810891        1.418314260332574        3.204673077408102      574.567303618002940        0.000269579661904    22862.912365944961000  5040801.118797620800000  1115235.030911661500000      269.579661904499400      284.599907984084100    95188.497235088900000    32607.118243632900000       31.677977210182917       23.682308286147485       25.000903998882492    -3390.070762918409400    19121.240979656719000     2958.214619132718800      275.766095056660280        7.515662693436435       85.193140679923061    20867.867299225683000     3152.868111431409500     8600.250367494942100        0.000000000114415       -0.000000000123651                      0.0                      0.0        1.060642972254759                      0.0                      0.0                      0.0        0.330233733764767        0.000001800000000        0.000000600000000
      200.564910885329000        0.000000000000788        0.000000000010793        0.000005466013600        0.000046131222744        0.000181673804543        0.000011265649762        0.000121366707151        0.000012653751907        0.000069500033504        0.003568325348755        0.000001063501310        0.000010849732117        0.000000000000102        0.000040251491276        0.015995019085969        0.248111347827030        0.031069554775084        0.000061114572738        0.000647130751803        0.000011265649762        0.000000845522710        0.000000022470205        0.000000000078149        0.000000000000000        0.000042028206445        0.000122694225180        0.000001271468976        0.000000000003003        0.000062491374885        0.000013418497599        0.000000000046113        0.000000002320784        0.000000007526586        0.000000001544478        0.000000000072845        0.000000000286350        0.000000000014542        0.000000000000000        0.000000002680865        0.000000000187781        0.000000004234852        0.000000000328225        0.000000000003113        0.000000000512578        0.000000000003066        0.000000000662958        0.000000000031465        0.000000000000000        0.000691379671866        0.001692785932320        0.000000010650068        0.000001295519757        0.000000001821288        0.000000016593540        0.000000023937189        0.000000017869250        0.000000103728912        0.000000000106420        0.000000108851680        0.000000000456606        0.000000000141720      -33.365797053374827        1.641509399663893        3.208424854777289       20.862640427355359        0.000375779816096    18965.187750430941000  5032923.147416389500000  1108416.935591728700000      375.779816096421030      398.513910777432780    95183.945221073242000    32389.856547980344000       44.945109961318963       32.900543760158314       34.892318467493141    -3384.742104089844800    19163.183703682258000     2940.963261423648400      275.826581391041150        6.300231812884778       71.957903728183467    19708.618097120689000     2256.141985523207000     8645.938342527191700        0.000000000059884       -0.000000000308147                      0.0                      0.0        1.474881718036575                      0.0                      0.0                      0.0        0.348849575762978        0.000001800000000        0.000000600000000
      200.565694648692810        0.000000000000668        0.000000000009457        0.000005262642048        0.000044436285470        0.000175082812969        0.000010851729927        0.000116985707511        0.000012194591903        0.000066963475979        0.003439703289754        0.000001023331568        0.000010441273377        0.000000000000097        0.000038784572458        0.015421458810882        0.239167339582961        0.029955713675956        0.000058801101222        0.000623837347645        0.000010851729927        0.000000814203171        0.000000021465060        0.000000000074761        0.000000000000000        0.000040486928877        0.000118198822265        0.000001224019176        0.000000000002835        0.000060228856569        0.000012926058144        0.000000000044092        0.000000002217591        0.000000007194909        0.000000001476203        0.000000000069643        0.000000000273834        0.000000000013906        0.000000000000000        0.000000002562801        0.000000000179612        0.000000004048356        0.000000000313821        0.000000000002976        0.000000000490057        0.000000000002932        0.000000000633846        0.000000000030089        0.000000000000000        0.000666406675941        0.001631685947800        0.000000010183606        0.000001247055946        0.000000001740273        0.000000015866330        0.000000022916961        0.000000017080941        0.000000099170398        0.000000000101809        0.000000109501472        0.000000000552378        0.000000000187943      -35.028175458825835        1.782321091732896        3.122121073660703     -237.959095435201220        0.000387055949634    17890.800825206792000  5022605.074900886000000  1108413.038073248900000      387.055949634199690      411.727285960615290    94581.314409478626000    31562.342218260324000       54.616824967925162       38.890987859015070       41.372092574695536    -3562.245680318172600    19127.047207424093000     2916.699800812765700      276.158107403130600        6.000000000000000       59.877294212585994    19796.941302936080000     1893.201566625965800     8821.279411257348300        0.000000000065795       -0.000000000435120                      0.0                      0.0        1.566828445486173                      0.0                      0.0                      0.0        0.353124544456899        0.000001800000000        0.000000600000000
      200.566476323494810        0.000000000000605        0.000000000007804        0.000005596453114        0.000046563648296        0.000177925908407        0.000011064262778        0.000119782769560        0.000012444965432        0.000068319515952        0.003492771086039        0.000001066093766        0.000010746014709        0.000000000000159        0.000039609275852        0.015659991196839        0.242791202976676        0.030409078357170        0.000061736399364        0.000633807704995        0.000011064262778        0.000000852702747        0.000000035049964        0.000000000092501        0.000000000000000        0.000041514971798        0.000120212370018        0.000001261220689        0.000000000006214        0.000061305295235        0.000013224974900        0.000000000071682        0.000000003614446        0.000000011724315        0.000000002405420        0.000000000113337        0.000000000445254        0.000000000022610        0.000000000000000        0.000000004168836        0.000000000292007        0.000000006585729        0.000000000510372        0.000000000004841        0.000000000797010        0.000000000004767        0.000000001030950        0.000000000048827        0.000000000000000        0.000677208456377        0.001658004745990        0.000000016596685        0.000001327360345        0.000000002837221        0.000000025859363        0.000000033262314        0.000000027840966        0.000000158653645        0.000000000165527        0.000000102371312        0.000000000555738        0.000000000159825      -36.394088498009772        1.602042338459989        3.071344774720199     -297.714121300078940        0.000292434762348    17861.043910404664000  5012017.955393652400000  1109595.553480357200000      292.434762347593960      310.456326995175460    93827.307113831062000    30684.644794159667000       45.914174259127464       32.550695074002086       34.554870913853968    -3690.155904915714000    19313.012328222805000     2901.620029249274500      275.572528984653450        6.400123286424329       57.245749692040484    20253.653661041222000     1970.130061186523600     9011.323295326785200        0.000000000077035       -0.000000000512225                      0.0        2.450776094273593        1.263242650530894                      0.0                      0.0                      0.0        0.355686910452475        0.000001800000000        0.000000600000000
      200.567262976605320        0.000000000000723        0.000000000005758        0.000005838189243        0.000048065547044        0.000179623805061        0.000011190601796        0.000121648208391        0.000012595220794        0.000069148678324        0.003522282263347        0.000001096397714        0.000010955134291        0.000000000000206        0.000040120435703        0.015791045002022        0.244836866362436        0.030669872353322        0.000063807710753        0.000639435146589        0.000011190601796        0.000000879759545        0.000000045523186        0.000000000105886        0.000000000000000        0.000042173588903        0.000121357077915        0.000001285523041        0.000000000008777        0.000061936909225        0.000013414892925        0.000000000092969        0.000000004692046        0.000000015209516        0.000000003121417        0.000000000147029        0.000000000577500        0.000000000029324        0.000000000000000        0.000000005407367        0.000000000378615        0.000000008543042        0.000000000662052        0.000000000006279        0.000000001033120        0.000000000006184        0.000000001337136        0.000000000063282        0.000000000000000        0.000683398354760        0.001673481068809        0.000000021532728        0.000001385086238        0.000000003683350        0.000000033560570        0.000000041207310        0.000000036134693        0.000000204542853        0.000000000214562        0.000000097199165        0.000000000396199        0.000000000110346      -37.935913121603775        1.407272906377205        2.986252712175242     -293.904003577681180        0.000188147679662    17889.283114642545000  5001422.947658568600000  1110783.574808887200000      188.147679662173630      198.757568998882280    92745.354696048234000    29826.663614474634000       33.789271241335733       23.902639376143402       25.250745442085140    -3840.831639455815500    19227.059647217910000     2888.152300673261800      275.870336247971070        6.986645899408275       55.064520566268889    20166.649992592556000     2005.872572245541300     9201.131894876965800        0.000000000100166       -0.000000000064733                      0.0        2.776044450285379        1.043794499294346                      0.0                      0.0                      0.0        0.380088632936977        0.000001800000000        0.000000600000000
      200.568043922706010        0.000000000000726        0.000000000007076        0.000005843922284        0.000048106060944        0.000179762908261        0.000011199163069        0.000121725847386        0.000012606069269        0.000069184418513        0.003524634690548        0.000001096500709        0.000010957804448        0.000000000000206        0.000040136510840        0.015799538084024        0.245009595663611        0.030687897196514        0.000063797811838        0.000639837470603        0.000011199163069        0.000000880273903        0.000000045644680        0.000000000105760        0.000000000000000        0.000042187007882        0.000121483695893        0.000001285981881        0.000000000008717        0.000061970257292        0.000013424424686        0.000000000093269        0.000000004705551        0.000000015256897        0.000000003130127        0.000000000147503        0.000000000579374        0.000000000029416        0.000000000000000        0.000000005424500        0.000000000379779        0.000000008569777        0.000000000664121        0.000000000006299        0.000000001037029        0.000000000006203        0.000000001341363        0.000000000063499        0.000000000000000        0.000683943331552        0.001673853352377        0.000000021591541        0.000001385847590        0.000000003693299        0.000000033651717        0.000000041283536        0.000000036234975        0.000000205125564        0.000000000215303        0.000000094806028        0.000000000348744        0.000000000115827      -37.917150824664475        1.538434812468600        2.998116733277181     -264.319779862442890        0.000236952114663    17885.678073016286000  4990813.740797362300000  1111874.317533623400000      236.952114663448810      251.292817120217020    92489.448926745157000    29829.053354358261000       42.905086200113544       29.996095790788779       31.811541588979342    -3847.540983606557300    19342.298102940113000     2873.333739043580900      275.875575177264010        6.684833127220857       52.721343082319336    20135.425337340072000     1918.384266037575800     9200.521403425800600        0.000000000086502        0.000000000545904                      0.0                      0.0        1.301651039696018                      0.0                      0.0                      0.0        0.381869826679046        0.000001800000000        0.000000600000000
      200.568829237576240        0.000000000000797        0.000000000008786        0.000006190754592        0.000050977149090        0.000190617612035        0.000011871566459        0.000129097344134        0.000013357806679        0.000073331709905        0.003739445248230        0.000001160834732        0.000011594285761        0.000000000000217        0.000042550264479        0.016760004084992        0.260009977678228        0.032563369157057        0.000067536158856        0.000678779300273        0.000011871566459        0.000000932370636        0.000000047994665        0.000000000111183        0.000000000000000        0.000044700139361        0.000128794179189        0.000001362977657        0.000000000009044        0.000065727962135        0.000014226867907        0.000000000098123        0.000000004948569        0.000000016038482        0.000000003292361        0.000000000155154        0.000000000609557        0.000000000030952        0.000000000000000        0.000000005705992        0.000000000399651        0.000000009015100        0.000000000698702        0.000000000006627        0.000000001091039        0.000000000006526        0.000000001411481        0.000000000066811        0.000000000000000        0.000725419614942        0.001775474079045        0.000000022702538        0.000001467902716        0.000000003883649        0.000000035382208        0.000000043447236        0.000000038114259        0.000000215789629        0.000000000226527        0.000000092437373        0.000000000443997        0.000000000152299      -37.938335035156186        1.856600284754460        2.974863047047205     -228.681215199607210        0.000336652080138    17895.412941232742000  4980177.308782665100000  1112881.086496220000000      336.652080137999290      358.877424766316320    92448.220346182148000    29767.241713720843000       62.118070399751225       42.634500312945377       45.449652664138064    -3845.768303062334300    19106.282549602434000     2869.278629209839900      275.881648787764790        6.000000000000000       47.285221013825463    19937.371199229765000     1810.334329188746300     9214.373964381939000        0.000000000074459        0.000000000267562        4.769673771543421                      0.0        1.511517297916234                      0.0                      0.0                      0.0        0.385548110896817        0.000001800000000        0.000000600000000
      200.569621730705960        0.000000000000876        0.000000000010762        0.000006036816964        0.000049755179449        0.000186219765848        0.000011591222737        0.000126031341250        0.000013047209573        0.000071590831331        0.003651734996624        0.000001132849168        0.000011325337554        0.000000000000210        0.000041535133623        0.016369330720823        0.253898748074111        0.031805500861212        0.000065820773218        0.000662975755557        0.000011591222737        0.000000909520053        0.000000046448284        0.000000000107686        0.000000000000000        0.000043626750054        0.000125801210228        0.000001328800633        0.000000000008637        0.000064177716577        0.000013889894806        0.000000000095032        0.000000004790560        0.000000015524817        0.000000003187095        0.000000000150152        0.000000000590286        0.000000000029973        0.000000000000000        0.000000005525561        0.000000000386999        0.000000008729250        0.000000000676617        0.000000000006418        0.000000001055904        0.000000000006320        0.000000001366630        0.000000000064707        0.000000000000000        0.000708457393646        0.001734297664756        0.000000021979371        0.000001430742933        0.000000003759921        0.000000034255444        0.000000042086592        0.000000036891447        0.000000208911582        0.000000000219339        0.000000086797380        0.000000000464507        0.000000000197402      -37.917942865530655        1.963561581423883        2.973350463560884     -148.646560420018970        0.000372571126835    17892.752095765878000  4969482.215533926200000  1113735.980060058400000      372.571126834662950      397.598051824964330    92406.899066759623000    29749.556750821685000       68.757486838972113       47.036565893399342       50.195848569467422    -3844.278725221177400    19079.556883785499000     2868.889330202886400      275.962388444240050        6.000000000000000       47.487635813742862    19399.559288638266000     1703.084468790086700     9218.336052466487700        0.000000000097677        0.000000000093888                      0.0                      0.0                      0.0                      0.0                      0.0                      0.0                      0.0        0.000001800000000        0.000000600000000
      200.570405281548120        0.000000000000961        0.000000000007151        0.000005958710427        0.000049135253807        0.000184079723152        0.000011449652116        0.000124580401519        0.000012888903592        0.000070726752389        0.003609393299086        0.000001117798971        0.000011178183562        0.000000000000206        0.000041028596381        0.016184033937185        0.250975060783029        0.031440225785448        0.000064914384740        0.000655210975493        0.000011449652116        0.000000897687682        0.000000045496436        0.000000000105531        0.000000000000000        0.000043082769883        0.000124327230603        0.000001312109222        0.000000000008346        0.000063424857563        0.000013720808117        0.000000000093137        0.000000004693085        0.000000015207655        0.000000003122305        0.000000000147131        0.000000000578444        0.000000000029378        0.000000000000000        0.000000005414817        0.000000000379324        0.000000008554203        0.000000000663096        0.000000000006289        0.000000001035411        0.000000000006194        0.000000001339010        0.000000000063425        0.000000000000000        0.000700181546332        0.001714144104305        0.000000021531929        0.000001411603378        0.000000003683157        0.000000033551552        0.000000041264938        0.000000036143574        0.000000204678359        0.000000000214975        0.000000089728868        0.000000000500220        0.000000000268428      -37.988430078057249        1.781530388463807        2.976774631580050      -85.794714356917041        0.000312448310805    17888.333871413812000  4958850.785558143600000  1114387.209678143500000      312.448310804587380      332.773505457567520    92377.582582242190000    29741.927024270546000       57.630849973439965       39.663682948578717       42.242433138950737    -3848.871929283410300    19154.138318368648000     2868.002466009950200      275.943299200687190        6.230697250654474       49.054204178964241    18897.738935547208000     1612.964526938349300     9220.051764919555400        0.000000000111236        0.000000000336475                      0.0                      0.0                      0.0                      0.0                      0.0                      0.0                      0.0        0.000001800000000        0.000000600000000
      200.571206742310780        0.000000000000667        0.000000000005509        0.000005564254375        0.000045904857238        0.000172153373830        0.000010710767040        0.000116561161497        0.000012046433958        0.000066117187844        0.003376974251568        0.000001044211958        0.000010446307373        0.000000000000190        0.000038354794106        0.015135014115606        0.234871157437324        0.029414415465873        0.000060545289145        0.000612997820555        0.000010710767040        0.000000838283835        0.000000042057464        0.000000000097627        0.000000000000000        0.000040252842413        0.000116261440310        0.000001225766179        0.000000000007581        0.000059318283366        0.000012821935198        0.000000000086170        0.000000004339770        0.000000014069541        0.000000002887740        0.000000000136179        0.000000000535161        0.000000000027182        0.000000000000000        0.000000005009160        0.000000000350946        0.000000007912486        0.000000000613382        0.000000000005818        0.000000000957742        0.000000000005730        0.000000001238900        0.000000000058689        0.000000000000000        0.000654989387133        0.001603971350413        0.000000019915650        0.000001316035162        0.000000003406369        0.000000031030200        0.000000038200092        0.000000033416711        0.000000189312403        0.000000000198835        0.000000095226759        0.000000000401284        0.000000000140473      -38.092008268734645        1.530375605438482        2.974675871993185     -175.784755176675670        0.000226959441474    14210.425897405110000  4948822.839295116300000  1118047.220150587400000      226.959441474042790      240.629794609610510    92438.013304432359000    29756.296651154204000       41.781515362350248       29.143856311323553       30.899258873919557    -3856.099004194625600    19185.875018473253000     2830.747116703784300      276.050621558952290        6.659100577446072       51.792110269530369    20291.431899415413000     1556.089768271971000     9216.883626282353400        0.000000000138707        0.000000000412809                      0.0                      0.0                      0.0                      0.0                      0.0                      0.0                      0.0        0.000001800000000        0.000000600000000
      200.572004884229160                      0.0                      0.0        0.000006545777898        0.000054061948891        0.000203188139145        0.000012626904458        0.000137479520674        0.000014202130671        0.000077933155725        0.003985159128745        0.000001228223056        0.000012305229053        0.000000000000220        0.000045211098569        0.017862421519087        0.277219929782577        0.034726510235741        0.000071092081046        0.000723486641386        0.000012626904458        0.000000986131753        0.000000048542605        0.000000000112821        0.000000000000000        0.000047411042862        0.000137215493258        0.000001442976351        0.000000000008468        0.000069976003860        0.000015107430097        0.000000000099642        0.000000005012043        0.000000016252559        0.000000003335253        0.000000000157360        0.000000000618667        0.000000000031421        0.000000000000000        0.000000005789294        0.000000000405754        0.000000009146461        0.000000000708997        0.000000000006725        0.000000001107337        0.000000000006624        0.000000001432133        0.000000000067865        0.000000000000000        0.000772851252518        0.001892842435709        0.000000022998529        0.000001546044138        0.000000003932886        0.000000035834888        0.000000044189866        0.000000038587199        0.000000218765049        0.000000000229852        0.000000085259679        0.000000000799753        0.000000000126669      -37.081614195859267        2.454381722759517        3.068980995293589      -95.859293617980995        0.000650537039966     9717.080677289439300  4945096.804382772200000  1133485.741346719700000      650.537039965628760      695.366385176493960    92618.964713468158000    29900.994596361616000      107.668522860763370       73.907861289649261       78.993530930208124    -3807.426554727469900    19646.111581218665000     2787.836579253074000      275.873481871594720        6.294277907446507       54.095576374085411    25216.131392121220000     1923.013051560869600     9184.449132103249200        0.000000000553074        0.000000000292705                      0.0                      0.0                      0.0                      0.0                      0.0                      0.0                      0.0        0.000001800000000        0.000000600000000
      200.572794388082370                      0.0                      0.0        0.000007333772988        0.000060653262490        0.000228391844007        0.000014178494497        0.000154491694859        0.000015946490029        0.000087504927491        0.004481271585619        0.000001375359230        0.000013795551594        0.000000000000242        0.000050760459441        0.020092317158122        0.311902066744466        0.039061916355787        0.000079492852850        0.000813554653866        0.000014178494497        0.000001104951194        0.000000053291635        0.000000000124052        0.000000000000000        0.000053196098884        0.000154329840659        0.000001617495811        0.000000000008971        0.000078640488515        0.000016956405269        0.000000000109601        0.000000005506127        0.000000017853448        0.000000003664078        0.000000000172933        0.000000000680296        0.000000000034554        0.000000000000000        0.000000006364745        0.000000000446268        0.000000010053714        0.000000000779611        0.000000000007394        0.000000001217525        0.000000000007284        0.000000001574184        0.000000000074651        0.000000000000000        0.000868840817338        0.002127317983424        0.000000025260341        0.000001729771566        0.000000004319841        0.000000039362366        0.000000048643941        0.000000042382810        0.000000240384556        0.000000000252757        0.000000077932723        0.000000001370917        0.000000000353236      -36.292849447392477        2.819823868703732        3.110453063583791     -161.593202654858940        0.000834373335335     8980.792811824811000  4945077.419439740500000  1153753.036660606500000      834.373335334940520      892.588491488968880    92891.258484114529000    29795.542807619957000      130.132981149803440       89.507440421197259       95.752650252336693    -3748.444497251536600    19668.368283228654000     2773.876133172605000      275.455672365593780        6.195494525750533       57.675574441559213    25606.380508629682000     2076.962471851626100     9208.095815814784100        0.000000001105856        0.000000000371641        6.434469741913671                      0.0        2.531988418796286        1.109528625562258                      0.0                      0.0        0.410521234284335        0.000001800000000        0.000000600000000
      200.573583891935640                      0.0                      0.0        0.000006221410584        0.000051530343432        0.000194457841395        0.000012061063513        0.000131490295917        0.000013561844096        0.000074412625151        0.003816189120028        0.000001167566814        0.000011712258638        0.000000000000201        0.000043163647191        0.017106752436762        0.265684541382590        0.033273989862315        0.000067307750019        0.000692833259366        0.000012061063513        0.000000937622674        0.000000044276963        0.000000000103159        0.000000000000000        0.000045192596506        0.000131395376297        0.000001373148534        0.000000000007183        0.000066928475542        0.000014418948142        0.000000000091194        0.000000004577853        0.000000014842649        0.000000003045907        0.000000000143826        0.000000000566081        0.000000000028761        0.000000000000000        0.000000005295555        0.000000000371416        0.000000008362610        0.000000000648760        0.000000000006153        0.000000001013152        0.000000000006061        0.000000001309788        0.000000000062149        0.000000000000000        0.000739727835781        0.001811643082230        0.000000021001710        0.000001465313178        0.000000003590592        0.000000032723927        0.000000040523162        0.000000035228126        0.000000199934240        0.000000000210348        0.000000078965934        0.000000001555588        0.000000000509596      -37.476271886206639        2.945731002497630        2.931292158594121     -120.907856845647710        0.000686192154473     8971.483684428438200  4945480.539889694200000  1173835.700133613800000      686.192154473391840      736.160166840029770    92147.371938736120000    28804.750018418163000      118.605578455567820       80.190180219052834       86.029783382546626    -3803.719879789599900    18376.295916012390000     2780.024850706522600      275.005693659206770        7.000000000000000       59.852724912831562    26149.491276038887000     2560.869613666673600     9433.384879168264900        0.000000000972598        0.000000000525689        6.223406824393290                      0.0        2.265016889613196        0.842672981173107                      0.0                      0.0        0.387079360431368        0.000001800000000        0.000000600000000
      200.574373395788850                      0.0                      0.0        0.000005149449406        0.000042440706903        0.000158950296592        0.000009863894041        0.000107723514784        0.000011091757061        0.000060852351514        0.003119047256181        0.000000962315483        0.000009606120356        0.000000000000190        0.000035320063149        0.013984750881058        0.217176692722455        0.027200661029379        0.000055494694017        0.000566429109493        0.000009863894041        0.000000775553054        0.000000041872462        0.000000000089956        0.000000000000000        0.000037003505232        0.000107452901604        0.000001126040347        0.000000000007976        0.000054728691471        0.000011806933845        0.000000000085906        0.000000004322810        0.000000014011828        0.000000002875880        0.000000000135690        0.000000000533520        0.000000000027101        0.000000000000000        0.000000004992929        0.000000000349944        0.000000007885282        0.000000000611505        0.000000000005800        0.000000000954973        0.000000000005713        0.000000001234636        0.000000000058509        0.000000000000000        0.000604663672263        0.001480797201877        0.000000019825303        0.000001220061732        0.000000003391264        0.000000030905472        0.000000037299124        0.000000033276095        0.000000188009830        0.000000000198290        0.000000082162015        0.000000001655692        0.000000000430738      -38.356084785233413        2.732093276566419        2.916168177517887     -116.956672481915400        0.000596238292528     8990.880647486201300  4945773.339981606200000  1194003.426251328100000      596.238292527719520      639.330033251092690    91945.255453710721000    28765.155253004443000      112.950057493886250       75.837045735308152       81.318620361701917    -3890.149655289015800    18695.027710867867000     2770.801120727466700      275.141748343086820        7.000000000000000       54.915272509194658    26282.867201485071000     3019.769991251944700     9442.933736054057600        0.000000000525554        0.000000000301034        5.119935148135911                      0.0        1.661742294323879        0.554807219501741                      0.0                      0.0        0.334942741590996        0.000001800000000        0.000000600000000
      200.575162899642070        0.000000000000675        0.000000000000501        0.000005320729168        0.000042867137488        0.000154671209579        0.000009639647847        0.000105762341634        0.000010861981084        0.000059538039342        0.003028143887945        0.000000978241585        0.000009546706395        0.000000000000297        0.000034613669214        0.013581459591082        0.210938373765047        0.026418843005622        0.000056886337433        0.000550622836807        0.000009639647847        0.000000798590285        0.000000065837295        0.000000000115901        0.000000000000000        0.000036505316396        0.000104591415745        0.000001119579252        0.000000000016906        0.000053364460669        0.000011603380156        0.000000000133811        0.000000006772853        0.000000021928333        0.000000004504562        0.000000000211709        0.000000000831265        0.000000000042210        0.000000000000000        0.000000007786790        0.000000000544791        0.000000012306471        0.000000000953024        0.000000000009043        0.000000001488199        0.000000000008902        0.000000001926456        0.000000000090890        0.000000000000000        0.000588063673627        0.001439632836276        0.000000031067688        0.000001291924137        0.000000005318262        0.000000048444270        0.000000054992786        0.000000052182504        0.000000291616273        0.000000000308853        0.000000097042923        0.000000001674188        0.000000000296920      -40.349582765192373        2.351415311408552        2.787885100117184     -107.449159110452800        0.000403188759197     8219.206350790958800  4946495.541515152900000  1214114.069862453500000      403.188759197439710      431.873379911594440    91220.431363616211000    27722.941591881961000       88.669025611360013       58.601065539675844       62.751360316142723    -4081.189332915847400    18375.044803813122000     2768.438103369309800      275.288495184490670        7.000000000000000       46.728224669914319    25634.731088861769000     3084.670913541256100     9687.560543064400900        0.000000000178487        0.000000000145779                      0.0                      0.0        1.173506602879408                      0.0                      0.0                      0.0        0.332992990688706        0.000001800000000        0.000000600000000
      200.575952403495280        0.000000000000749        0.000000000001506        0.000005331811698        0.000042909487339        0.000154405811857        0.000009622517602        0.000105800987856        0.000010846713370        0.000059424032286        0.003023850849744        0.000000978354300        0.000009532287183        0.000000000000303        0.000034551692828        0.013563369659153        0.210705686902046        0.026390658282992        0.000056842405648        0.000549929311297        0.000009622517602        0.000000799195472        0.000000067147874        0.000000000116325        0.000000000000000        0.000036443465184        0.000104421139295        0.000001117615972        0.000000000016940        0.000053281185143        0.000011577884104        0.000000000136621        0.000000006909726        0.000000022376709        0.000000004595666        0.000000000216063        0.000000000848678        0.000000000043088        0.000000000000000        0.000000007948425        0.000000000556272        0.000000012562110        0.000000000973103        0.000000000009230        0.000000001519162        0.000000000009087        0.000000001966042        0.000000000092802        0.000000000000000        0.000587193848303        0.001437164368818        0.000000031696234        0.000001294164845        0.000000005424661        0.000000049412326        0.000000055907509        0.000000053226995        0.000000297437907        0.000000000315292        0.000000106064028        0.000000001615416        0.000000000134414      -42.342469945768968        1.728840979827385        2.670637764454304      483.347206030389030        0.000179463501652     3945.239295373728100  4951315.891516304600000  1230043.280661595100000      179.463501652197520      190.405690901765070    90368.466775169582000    27131.121844214533000       49.934928339839026       32.551417417252559       34.533137543486831    -4273.110225557342300    18178.555918595732000     2763.037351704246700      275.491954230055800        7.000000000000000       38.521703948964806    24806.451563269642000     3084.489510064365700     9828.499250697928800        0.000000000140259        0.000000000309490                      0.0        5.874179750352752        0.942347440709262                      0.0                      0.0                      0.0        0.343709571626681        0.000001800000000        0.000000600000000
      200.576741907348490        0.000000000000652        0.000000000004718        0.000005441389471        0.000043845357484        0.000158195636931        0.000009846653839        0.000108201778758        0.000011098664820        0.000060790963760        0.003098611703682        0.000000997845272        0.000009739065472        0.000000000000304        0.000035341400781        0.013894380837620        0.215950588525018        0.027043974750690        0.000057888257896        0.000563452610947        0.000009846653839        0.000000815044413        0.000000067219252        0.000000000116428        0.000000000000000        0.000037237935167        0.000106917042831        0.000001141566300        0.000000000016358        0.000054557661688        0.000011841180957        0.000000000136982        0.000000006922577        0.000000022422641        0.000000004604500        0.000000000216682        0.000000000851048        0.000000000043217        0.000000000000000        0.000000007969608        0.000000000557897        0.000000012589472        0.000000000975827        0.000000000009255        0.000000001523370        0.000000000009112        0.000000001971365        0.000000000093106        0.000000000000000        0.000601446322571        0.001472441366381        0.000000031759141        0.000001317267825        0.000000005433464        0.000000049503924        0.000000056060432        0.000000053320400        0.000000298023011        0.000000000316257        0.000000103401636        0.000000001514276        0.000000000078715      -42.020092193644174        1.761976833612295        2.703351727488913      663.739196471008880        0.000201423450482    17549.308086123372000  4962309.006526402200000  1236032.012391282700000      201.423450481521800      214.037192440825630    90373.873353615767000    27181.917939218107000       53.622556836340223       35.102329454404725       37.292109403942888    -4239.034308351574500    18365.370956483959000     2760.463100548005500      275.434157270919000        7.000000000000000       39.798745486463538    23233.999937650140000     2662.322280766384700     9816.198529862664100        0.000000000107463                      0.0        4.794555172666567                      0.0        1.060503038593214                      0.0                      0.0                      0.0        0.309935853951176        0.000001800000000        0.000000600000000
      200.577531411201760        0.000000000000763        0.000000000007914        0.000006023772238        0.000048600645832        0.000175693524901        0.000010932419230        0.000120167546047        0.000012308434673        0.000067440219832        0.003441606616599        0.000001103907874        0.000010790470704        0.000000000000331        0.000039205725193        0.015434890580723        0.239941073203844        0.030046631664450        0.000063971979576        0.000625911986511        0.000010932419230        0.000000901768648        0.000000073143226        0.000000000126738        0.000000000000000        0.000041282027152        0.000118776408491        0.000001264121360        0.000000000017231        0.000060558376086        0.000013137688491        0.000000000149300        0.000000007536859        0.000000024416158        0.000000005012600        0.000000000236014        0.000000000927402        0.000000000047092        0.000000000000000        0.000000008683253        0.000000000608018        0.000000013714416        0.000000001062889        0.000000000010082        0.000000001660121        0.000000000009930        0.000000002147233        0.000000000101507        0.000000000000000        0.000667882794557        0.001635238085547        0.000000034573712        0.000001455319366        0.000000005915193        0.000000053889246        0.000000061083010        0.000000058041965        0.000000324645651        0.000000000344613        0.000000091043267        0.000000001447025        0.000000000142431      -41.780339041380401        2.231720528810794        2.731047410445013      770.436942241779780        0.000323863694019    34102.010583556112000  4974414.478750128300000  1235312.255816041300000      323.863694019331720      346.777604778265980    90406.688835466222000    27169.619876546494000       85.757517764747547       55.648879198480415       59.586367281968336    -4217.182295247685000    18539.826858840155000     2752.937616030147600      275.311783604900200        7.000000000000000       40.708991350309340    23191.302693860714000     2512.475500015640600     9819.181018124192600        0.000000000078729                      0.0        5.497597521545867                      0.0        1.759885460862847                      0.0                      0.0                      0.0        0.394985485836384        0.000001800000000        0.000000600000000
      200.578320915054970        0.000000000000797        0.000000000008599        0.000007114009939        0.000057467303314        0.000208109000131        0.000012934993713        0.000142300314188        0.000014569504173        0.000079785230410        0.004075958025548        0.000001303401896        0.000012751923254        0.000000000000385        0.000046384830717        0.018285583159266        0.284297615590955        0.035600643465288        0.000075418539847        0.000741381323749        0.000012934993713        0.000001064365779        0.000000085030830        0.000000000147294        0.000000000000000        0.000048802229964        0.000140674793531        0.000001493953519        0.000000000019452        0.000071702669291        0.000015543381026        0.000000000173774        0.000000008765981        0.000000028400647        0.000000005830304        0.000000000274671        0.000000001079385        0.000000000054825        0.000000000000000        0.000000010107822        0.000000000707834        0.000000015963368        0.000000001237150        0.000000000011737        0.000000001932547        0.000000000011561        0.000000002499126        0.000000000118195        0.000000000000000        0.000791008839517        0.001936962837284        0.000000040211312        0.000001714999158        0.000000006879098        0.000000062674108        0.000000071090914        0.000000067496714        0.000000377630978        0.000000000401135        0.000000085241524        0.000000001543956        0.000000000274106      -42.028157429798611        2.450948503556527        2.735209213795520      936.785145357831310        0.000376497409540    34519.374307860453000  4986517.800687108200000  1233228.252403942200000      376.497409540465700      403.891617506631460    90418.311094736360000    27180.283236861334000      102.964153874070020       66.465782998651193       71.302323095328717    -4243.518757645286300    18721.889235860581000     2745.851531816025300      275.307614970100530        7.000000000000000       39.660793870082749    23522.672777971940000     2903.262932419716400     9816.606681719651500        0.000000000089315                      0.0        5.584084142575666                      0.0        2.020361358510124                      0.0                      0.0                      0.0        0.399750897490727        0.000001800000000        0.000000600000000
      200.579110418908240        0.000000000001183        0.000000000007861        0.000006062755797        0.000049027145881        0.000177790664179        0.000011041296825        0.000121582066059        0.000012436691372        0.000068114429304        0.003483785543623        0.000001110679745        0.000010874647629        0.000000000000323        0.000039602246997        0.015630294334637        0.242983177857643        0.030430015832358        0.000064186123600        0.000633520216859        0.000011041296825        0.000000906700099        0.000000071492082        0.000000000123819        0.000000000000000        0.000041634114020        0.000120192696372        0.000001273990725        0.000000000015942        0.000061250174477        0.000013263922881        0.000000000146313        0.000000007373282        0.000000023895467        0.000000004904329        0.000000000231122        0.000000000908659        0.000000000046154        0.000000000000000        0.000000008505352        0.000000000595882        0.000000013436884        0.000000001041577        0.000000000009881        0.000000001626774        0.000000000009730        0.000000002103467        0.000000000099471        0.000000000000000        0.000675907478814        0.001654897407479        0.000000033822611        0.000001458913365        0.000000005785661        0.000000052717119        0.000000059835901        0.000000056767593        0.000000317711237        0.000000000337656        0.000000085777255        0.000000001410425        0.000000000276628      -42.174279032703076        2.407231772468908        2.735091261994591      886.881793269082550        0.000365241484513    33267.420389782194000  4998285.576951936800000  1229355.065467092900000      365.241484513009820      391.688030747916630    90424.805178314433000    27175.896657676960000      101.439255695979170       65.426301008500474       70.164220877051122    -4250.714057963877200    18800.008275823762000     2733.152057988187200      275.384993489569130        7.000000000000000       39.007851322457434    23341.873425814520000     2793.977047369109200     9817.661453329092200        0.000000000207374                      0.0                      0.0                      0.0                      0.0                      0.0                      0.0                      0.0                      0.0        0.000001800000000        0.000000600000000
      200.579899922761460        0.000000000001462        0.000000000007042        0.000005268276087        0.000042642810351        0.000154951545571        0.000009615524404        0.000105946825483        0.000010825415985        0.000059295390844        0.003036262284302        0.000000964403085        0.000009457134084        0.000000000000277        0.000034472025787        0.013620226172847        0.211818538890179        0.026530484251078        0.000055674910243        0.000552147342908        0.000009615524404        0.000000787435488        0.000000061111322        0.000000000105846        0.000000000000000        0.000036218588683        0.000104777062895        0.000001107536453        0.000000000013217        0.000053357871840        0.000011545655600        0.000000000125255        0.000000006306585        0.000000020438785        0.000000004194333        0.000000000197828        0.000000000777955        0.000000000039512        0.000000000000000        0.000000007278558        0.000000000510154        0.000000011498549        0.000000000891599        0.000000000008458        0.000000001392356        0.000000000008330        0.000000001800441        0.000000000085204        0.000000000000000        0.000589027431721        0.001442060652006        0.000000028918595        0.000001264688040        0.000000004947106        0.000000045084672        0.000000051216892        0.000000048543537        0.000000271850472        0.000000000289041        0.000000086082985        0.000000001501106        0.000000000260955      -41.753487444196061        2.415339989307483        2.766376461300447     1021.607409745367600        0.000389181014057    32715.900492850629000  5009195.235363938800000  1222270.089266767500000      389.181014056612130      417.293048126104280    90415.325035656075000    27186.576834640309000      102.917083565137160       66.718183772458772       71.537549415108899    -4226.490193527411100    18912.042349505282000     2733.632797395817300      275.442101580158290        7.000000000000000       40.767420741210103    23441.047839803305000     2794.502502674286500     9815.076518688811100        0.000000000290198       -0.000000000052231                      0.0                      0.0                      0.0                      0.0                      0.0                      0.0                      0.0        0.000001800000000        0.000000600000000
      200.580689426614670                      0.0                      0.0        0.000006659419121        0.000053955291066        0.000196376040555        0.000012176654718        0.000134188349701        0.000013704544715        0.000075072025989        0.003847241196199        0.000001218953615        0.000011962701306        0.000000000000345        0.000043641178421        0.017263873759600        0.268517662443455        0.033628465719616        0.000070278677780        0.000699812410724        0.000012176654718        0.000000994650695        0.000000076230624        0.000000000132018        0.000000000000000        0.000045829667489        0.000132814594166        0.000001400622670        0.000000000016073        0.000067597677515        0.000014611883616        0.000000000156397        0.000000007869241        0.000000025500058        0.000000005233920        0.000000000247008        0.000000000971455        0.000000000049339        0.000000000000000        0.000000009086669        0.000000000637079        0.000000014353726        0.000000001113172        0.000000000010564        0.000000001738216        0.000000000010400        0.000000002247528        0.000000000106428        0.000000000000000        0.000746361979461        0.001826619952151        0.000000036090753        0.000001596221421        0.000000006172313        0.000000056246169        0.000000063949788        0.000000060562960        0.000000339298984        0.000000000360936        0.000000097755384        0.000000001519916        0.000000000292767      -41.239844520486137        2.844516722591058        2.764125136199322     1336.800379109186700        0.000498911864311    31610.282595042103000  5019742.495319452100000  1214594.374089004900000      498.911864310970710      536.243773123181310    90288.084791294197000    27195.872758446971000      125.097625516986870       81.159343340382108       87.233901233175615    -4155.772407937041000    18606.417832057552000     2720.724205924747400      275.372266188095580        7.000000000000000       43.094465362131196    23016.406834034940000     3770.083928268611500     9812.838006070540400        0.000000000283900        0.000000000075723                      0.0                      0.0                      0.0                      0.0                      0.0                      0.0                      0.0        0.000001800000000        0.000000600000000
      200.581478930467880                      0.0                      0.0        0.000007872631001        0.000063826557125        0.000232572493962        0.000014408516271        0.000158873061527        0.000016220333044        0.000088854905690        0.004556651245883        0.000001440607025        0.000014151714555        0.000000000000405        0.000051640191036        0.020446360614764        0.318041118365699        0.039830813468133        0.000083009766620        0.000828733050603        0.000014408516271        0.000001175578375        0.000000089327849        0.000000000154702        0.000000000000000        0.000054218052926        0.000157214837106        0.000001656674936        0.000000000018529        0.000080031826740        0.000017291252866        0.000000000183437        0.000000009223545        0.000000029902056        0.000000006135561        0.000000000289574        0.000000001139269        0.000000000057864        0.000000000000000        0.000000010654977        0.000000000747252        0.000000016826384        0.000000001305055        0.000000000012383        0.000000002038529        0.000000000012199        0.000000002635789        0.000000000124823        0.000000000000000        0.000883759771597        0.002163502122428        0.000000042308421        0.000001885067128        0.000000007234927        0.000000065931631        0.000000074998423        0.000000070990668        0.000000397791724        0.000000000423314        0.000000083755830        0.000000001260307        0.000000000413301      -41.897352161430085        3.148739939383068        2.699776587202420      933.359541955566100        0.000515512821999    27687.263883594769000  5025380.652136645300000  1201668.414957129400000      515.512821999097580      555.279873043810200    90261.688276197528000    27196.458605177388000      139.735283302538480       89.722788001907645       96.646939094291170    -4223.415968103614400    18255.437401165647000     2710.706502963993900      275.181908527357170        7.000000000000000       40.214650434047307    22480.585935489449000     3015.985334508919100     9812.702108205596200        0.000000000578687        0.000000000056396                      0.0                      0.0                      0.0                      0.0                      0.0                      0.0                      0.0        0.000001800000000        0.000000600000000
      200.582268434321090                      0.0                      0.0        0.000009446595599        0.000076625490909        0.000279400547822        0.000017303302936        0.000190797276418        0.000019475178814        0.000106704311408        0.005474301719502        0.000001729059228        0.000016983342419        0.000000000000482        0.000062016598650        0.024549015538304        0.382061880773185        0.047849220840483        0.000099532785318        0.000995412355347        0.000017303302936        0.000001411811666        0.000000106496590        0.000000000184468        0.000000000000000        0.000065074782115        0.000188842994342        0.000001987439359        0.000000000021823        0.000096075329223        0.000020764995621        0.000000000218877        0.000000010994703        0.000000035653962        0.000000007315468        0.000000000345372        0.000000001358809        0.000000000069021        0.000000000000000        0.000000012710949        0.000000000891319        0.000000020068864        0.000000001556970        0.000000000014771        0.000000002431251        0.000000000014544        0.000000003142982        0.000000000148944        0.000000000000000        0.001061582830205        0.002599131432626        0.000000050447754        0.000002259501081        0.000000008626288        0.000000078612065        0.000000089451022        0.000000084639180        0.000000474389127        0.000000000504896        0.000000079517579        0.000000001408981        0.000000000580082      -41.852076102952765        3.138772423599877        2.705816379912577     1070.927232616793800        0.000518302574218    27099.624679306573000  5027230.598248393300000  1185971.287860553200000      518.302574218479210      558.210105367664940    90332.170362756849000    27202.534646498407000      139.847201918284530       89.846977528026159       96.769146047566707    -4230.708950491737600    18297.514856329428000     2700.929229237818600      275.198847810829930        7.000000000000000       40.447494501741872    21747.440657653136000     3045.256407295208200     9811.221072389473200        0.000000001177379        0.000000000121980        6.161510455404964                      0.0        2.471557297056895        1.108466332239104                      0.0                      0.0        0.441801611817685        0.000001800000000        0.000000600000000
      200.583057277921820                      0.0                      0.0        0.000008542342432        0.000069321900692        0.000253056259525        0.000015662613198        0.000172769787300        0.000017624263605        0.000096532836591        0.004956514823141        0.000001563459973        0.000015360114990        0.000000000000433        0.000056120157420        0.022230881752081        0.345997476021702        0.043337830169636        0.000089950507231        0.000901395649989        0.000015662613198        0.000001275862906        0.000000095678802        0.000000000165723        0.000000000000000        0.000058873400264        0.000171005985332        0.000001798321377        0.000000000019361        0.000087021830242        0.000018782701552        0.000000000196640        0.000000009883902        0.000000032034252        0.000000006573552        0.000000000310354        0.000000001221150        0.000000000062040        0.000000000000000        0.000000011422407        0.000000000801197        0.000000018047317        0.000000001399752        0.000000000013276        0.000000002185925        0.000000000013078        0.000000002825011        0.000000000133854        0.000000000000000        0.000961278732901        0.002352910995023        0.000000045333588        0.000002041953880        0.000000007749854        0.000000070633317        0.000000080409161        0.000000076042635        0.000000426303058        0.000000000453731        0.000000089264337        0.000000001517211        0.000000000512976      -41.785029760888520        2.813020286267932        2.717139203449996     1431.466498569711800        0.000456271122352    27185.753427942855000  5029509.288250522700000  1170278.030071402200000      456.271122352193060      490.582058295717960    90393.159188620906000    27190.825377778656000      120.615191180262190       77.785458828346663       83.632671637463531    -4217.336850787102800    18387.670150982780000     2698.899305313125800      275.395952515991720        7.000000000000000       40.875311846618139    21017.642307959606000     4051.928525638396000     9814.049356462848700        0.000000000757357        0.000000000309409                      0.0                      0.0        1.787081271358990                      0.0                      0.0                      0.0        0.354157977880078        0.000001800000000        0.000000600000000
      200.583849249877230        0.000000000001153        0.000000000008108        0.000007873889836        0.000063925738458        0.000233500306003        0.000014457851689        0.000159477292985        0.000016265930000        0.000089069463554        0.004574664420000        0.000001440601483        0.000014166670566        0.000000000000397        0.000051770089062        0.020520245779486        0.319434538206623        0.040002905051597        0.000082843150088        0.000832063385993        0.000014457851689        0.000001175757507        0.000000087548010        0.000000000151649        0.000000000000000        0.000054292946224        0.000157839380349        0.000001657593398        0.000000000017480        0.000080303262279        0.000017325341428        0.000000000180161        0.000000009046383        0.000000029329505        0.000000006017856        0.000000000284187        0.000000001118555        0.000000000056817        0.000000000000000        0.000000010460711        0.000000000733787        0.000000016514478        0.000000001281556        0.000000000012155        0.000000002002080        0.000000000011975        0.000000002587268        0.000000000122608        0.000000000000000        0.000887172069051        0.002172244807318        0.000000041494561        0.000001880212904        0.000000007094772        0.000000064662185        0.000000073632934        0.000000069609287        0.000000390308040        0.000000000415601        0.000000108484070        0.000000001557074        0.000000000319593      -42.868622573631676        2.387004834415251        2.661392015068354     1351.361216645274900        0.000319878794755    27249.035739771647000  5032185.292417069000000  1154629.469398020500000      319.878794754790760      343.123786347053680    90407.421340233457000    27178.276474585564000       94.612162245532204       60.529581645317627       64.917806646971570    -4325.525218250239000    18369.788758416838000     2698.083239221683900      275.332000042759890        7.000000000000000       36.503502642776525    21111.169758242562000     4018.172039486752500     9817.094421739610000        0.000000000180510        0.000000000240903                      0.0                      0.0        1.612104756347645                      0.0                      0.0                      0.0        0.305101271592048        0.000001800000000        0.000000600000000
      200.584632708441660        0.000000000001024        0.000000000006720        0.000007621661760        0.000061915103753        0.000226295562609        0.000014004765131        0.000154502032851        0.000015751685089        0.000086296340465        0.004434138568021        0.000001395165768        0.000013717222321        0.000000000000382        0.000050164000902        0.019885878451977        0.309643409963500        0.038782074724513        0.000080129684432        0.000806576651505        0.000014004765131        0.000001138225039        0.000000084184297        0.000000000145855        0.000000000000000        0.000052586024751        0.000153020047368        0.000001604349750        0.000000000016598        0.000077824814322        0.000016789584087        0.000000000173388        0.000000008700780        0.000000028211270        0.000000005787848        0.000000000273401        0.000000001076686        0.000000000054665        0.000000000000000        0.000000010070971        0.000000000706019        0.000000015888139        0.000000001233493        0.000000000011688        0.000000001925840        0.000000000011523        0.000000002489134        0.000000000117918        0.000000000000000        0.000859922192674        0.002105083119705        0.000000039908311        0.000001818520262        0.000000006823631        0.000000062192863        0.000000070843902        0.000000066948895        0.000000375446370        0.000000000399829        0.000000113538645        0.000000001600232        0.000000000180302      -43.445070886602856        2.106328157467698        2.635510677693521     1256.155873496314400        0.000241682292437    26753.893944123945000  5034499.559535296600000  1139073.710699171300000      241.682292437405470      258.415093698372860    90255.389012018117000    27185.433318662952000       77.788677947264659       49.564411738230405       52.995770758849375    -4385.555951317442100    18402.228393551704000     2692.731736992277500      275.161355534491290        7.000000000000000       34.132436986852703    21167.306157632749000     3697.168859792221600     9815.360960157084300        0.000000000098239        0.000000000037266                      0.0                      0.0        1.568964098120809                      0.0                      0.0                      0.0        0.299025909738051        0.000001800000000        0.000000600000000
      200.585418041526370        0.000000000000863        0.000000000007208        0.000007239202528        0.000058833214564        0.000215181095665        0.000013315417165        0.000146921755475        0.000014981567842        0.000082024321940        0.004216698189642        0.000001324502143        0.000013030846319        0.000000000000360        0.000047674401766        0.018917340532466        0.294503106855025        0.036879908691913        0.000076070131164        0.000766953013609        0.000013315417165        0.000001080481154        0.000000079478994        0.000000000137636        0.000000000000000        0.000049969866947        0.000145503242367        0.000001525041978        0.000000000015494        0.000073991446288        0.000015958615980        0.000000000163721        0.000000008216520        0.000000026637389        0.000000005465501        0.000000000258212        0.000000001016483        0.000000000051637        0.000000000000000        0.000000009504860        0.000000000666882        0.000000015005771        0.000000001164599        0.000000000011043        0.000000001818976        0.000000000010888        0.000000002350528        0.000000000111456        0.000000000000000        0.000817651134186        0.002001705025533        0.000000037685401        0.000001725948212        0.000000006442925        0.000000058723759        0.000000066922980        0.000000063217004        0.000000354586912        0.000000000377671        0.000000112050865        0.000000001483023        0.000000000137629      -43.494754124420680        2.017501573011549        2.633394481720623      967.279761876143080        0.000222720405375    24494.688540555322000  5033954.848227180500000  1124016.552654973500000      222.720405374912730      237.784501452051810    89841.444834478112000    27182.236824574706000       71.971374267266512       45.908461997021760       49.013583621218764    -4390.377130618182500    18405.931664182801000     2665.808718738078400      275.408356502406040        7.000000000000000       34.028737142996945    20434.966390593399000     3523.523647113600000     9816.121832975559300        0.000000000104771        0.000000000030533                      0.0                      0.0        1.592866951993183                      0.0                      0.0                      0.0        0.295799933910490        0.000001800000000        0.000000600000000
      200.586202531770030        0.000000000000969        0.000000000007417        0.000006737014656        0.000054767343292        0.000200461663545        0.000012401840552        0.000136850565628        0.000013952375129        0.000076381069386        0.003928470716642        0.000001232501691        0.000012133664723        0.000000000000334        0.000044392665682        0.017623590451401        0.274372510592811        0.034359377853678        0.000070755514530        0.000714508669515        0.000012401840552        0.000001005440676        0.000000073576228        0.000000000127409        0.000000000000000        0.000046517332016        0.000135507055145        0.000001419283247        0.000000000014200        0.000068914168669        0.000014856346077        0.000000000151626        0.000000007607235        0.000000024662157        0.000000005060436        0.000000000239080        0.000000000941406        0.000000000047827        0.000000000000000        0.000000008802814        0.000000000617687        0.000000013896217        0.000000001078427        0.000000000010226        0.000000001684844        0.000000000010083        0.000000002176739        0.000000000103204        0.000000000000000        0.000761621490663        0.001864872251291        0.000000034892602        0.000001604738290        0.000000005964783        0.000000054364833        0.000000061975470        0.000000058528694        0.000000328327275        0.000000000349762        0.000000112082194        0.000000001380508        0.000000000120696      -43.491071064439176        1.996625219883684        2.641425650586597      877.322292615095190        0.000221612828661    23370.531296397516000  5030248.944332219700000  1110008.369094423700000      221.612828661360420      236.521197246812790    89667.027469523251000    27184.241830446364000       71.539743082411590       45.671288772972780       48.744294430108681    -4378.317296677910200    18493.644446617949000     2640.567674085824800      275.475409836065580        7.000000000000000       34.000000000000000    20148.768954316653000     3328.288354304048400     9815.638385765994800        0.000000000093746        0.000000000043182                      0.0                      0.0        1.614218778534857                      0.0                      0.0                      0.0        0.286000685462966        0.000001800000000        0.000000600000000
      200.586987341928530        0.000000000000787        0.000000000007049        0.000006278591532        0.000051070353215        0.000187054978496        0.000011558843049        0.000127675800384        0.000013011717347        0.000071243920544        0.003666039293781        0.000001148567169        0.000011315146823        0.000000000000308        0.000041405842216        0.016442563313906        0.256090555549157        0.032064756180332        0.000065890314868        0.000666822028099        0.000011558843049        0.000000936793306        0.000000068039171        0.000000000117802        0.000000000000000        0.000043378171734        0.000126441550742        0.000001323498426        0.000000000012945        0.000064307476768        0.000013859166406        0.000000000140311        0.000000007036888        0.000000022819498        0.000000004681098        0.000000000221211        0.000000000871166        0.000000000044260        0.000000000000000        0.000000008144837        0.000000000571631        0.000000012871498        0.000000000998112        0.000000000009466        0.000000001558390        0.000000000009327        0.000000002015051        0.000000000095549        0.000000000000000        0.000710739286862        0.001740284409265        0.000000032274463        0.000001493773721        0.000000005517609        0.000000050287349        0.000000057349298        0.000000054130402        0.000000303822705        0.000000000323643        0.000000112030197        0.000000001367502        0.000000000071746      -43.455122162672524        1.994399983568312        2.636215378906806      153.750510056743880        0.000219156043121    17789.535912589065000  5023025.551799663300000  1102630.468250390100000      219.156043120954310      233.882795682064540    89661.810281765793000    27196.784111260498000       70.504384441826431       45.017132832280637       48.042107119911108    -4376.097692538836800    18416.051821845685000     2634.409249222141200      274.944973362098210        7.000000000000000       34.000000000000000    18049.666797806185000     2363.333195719422300     9812.614732453237600        0.000000000109429        0.000000000010409                      0.0                      0.0        1.511045214661714                      0.0                      0.0                      0.0        0.274734243410069        0.000001800000000        0.000000600000000
      200.587769782471100        0.000000000000892        0.000000000006375        0.000006274245610        0.000051073248461        0.000187350892125        0.000011567610905        0.000127857810665        0.000013022690005        0.000071284680865        0.003671018129203        0.000001147070483        0.000011307988069        0.000000000000305        0.000041430876769        0.016467880876197        0.256490329955048        0.032122367469661        0.000065750046384        0.000667707749094        0.000011567610905        0.000000935676001        0.000000067195205        0.000000000116399        0.000000000000000        0.000043381928585        0.000126567893210        0.000001322775019        0.000000000012511        0.000064377104921        0.000013858755578        0.000000000138696        0.000000006952677        0.000000022548877        0.000000004624768        0.000000000218661        0.000000000861234        0.000000000043754        0.000000000000000        0.000000008050999        0.000000000565174        0.000000012716194        0.000000000986645        0.000000000009357        0.000000001541202        0.000000000009221        0.000000001990940        0.000000000094484        0.000000000000000        0.000711630850824        0.001742595913621        0.000000031881702        0.000001491111983        0.000000005450604        0.000000049680185        0.000000056690808        0.000000053475310        0.000000300191744        0.000000000319971                      0.0                      0.0                      0.0      -43.537389446041217        2.001424077181973        2.645329185249597     -180.503652851680700        0.000224085143296    16084.450322369359000  5013107.643397579000000  1107493.042407303800000      224.085143295624360      239.185731891746850    89673.953867843564000    27171.246826951978000       72.681507714670957       46.383183909224066       49.508517541003656    -4399.888347144548800    18561.965992470941000     2617.022523814694100      275.311475409836080        7.000000000000000       34.000000000000000    16243.524576955773000     1309.149511504197600     9818.793764021002100                      0.0        0.000000000049215                      0.0                      0.0        1.625349920539205                      0.0                      0.0                      0.0        0.294953599520093        0.000001800000000        0.000000600000000
      200.588554229377990        0.000000000000904        0.000000000005758        0.000006145858736        0.000050072022658        0.000183968529264        0.000011352631116        0.000125525045814        0.000012771772923        0.000069931964751        0.003605564832000        0.000001123931447        0.000011075619616        0.000000000000295        0.000040645696409        0.016180674873716        0.251974558061758        0.031543316960547        0.000064313011344        0.000655732284171        0.000011352631116        0.000000916264056        0.000000064990278        0.000000000112543        0.000000000000000        0.000042528885682        0.000124379146980        0.000001296337431        0.000000000011808        0.000063182270398        0.000013591041264        0.000000000134374        0.000000006726619        0.000000021811766        0.000000004474240        0.000000000211648        0.000000000833751        0.000000000042362        0.000000000000000        0.000000007793268        0.000000000547168        0.000000012304533        0.000000000955171        0.000000000009059        0.000000001492106        0.000000000008927        0.000000001927737        0.000000000091497        0.000000000000000        0.000698652819607        0.001710937549080        0.000000030853274        0.000001459078819        0.000000005272761        0.000000048061839        0.000000054890058        0.000000051735658        0.000000290502107        0.000000000309776                      0.0                      0.0                      0.0      -43.473008640899131        1.981270887249684        2.651256138924925     -275.280175283253470        0.000222285685501    16052.466240043452000  5003219.683107815700000  1113692.829219328900000      222.285685501303930      237.185231694943500    89672.187081061173000    27181.515495756914000       71.548130350365000       45.721143516979268       48.785888095448627    -4393.808605430655000    18591.688327651267000     2613.305768672726600      275.295258889267930        7.000000000000000       34.097299123408852    19412.749088495970000     1279.702647263958200     9816.300965129494200                      0.0        0.000000000224304                      0.0                      0.0                      0.0                      0.0                      0.0                      0.0                      0.0        0.000001800000000        0.000000600000000
      200.589338676284910        0.000000000001021        0.000000000005963        0.000006060593423        0.000049431507419        0.000181930645297        0.000011221021102        0.000124113574387        0.000012615095868        0.000069080424588        0.003564068716074        0.000001108253885        0.000010928095687        0.000000000000287        0.000040144510273        0.016005547140307        0.249241243513081        0.031199389000423        0.000063343693583        0.000648363377319        0.000011221021102        0.000000903458441        0.000000063248330        0.000000000109653        0.000000000000000        0.000041983364543        0.000123046276589        0.000001279893230        0.000000000011205        0.000062449452486        0.000013418834297        0.000000000130837        0.000000006549486        0.000000021238754        0.000000004357006        0.000000000206247        0.000000000812328        0.000000000041277        0.000000000000000        0.000000007591787        0.000000000533140        0.000000011979514        0.000000000930548        0.000000000008825        0.000000001454313        0.000000000008697        0.000000001876987        0.000000000089169        0.000000000000000        0.000690783557551        0.001691426106992        0.000000030032651        0.000001436312381        0.000000005133048        0.000000046790908        0.000000053487799        0.000000050368961        0.000000282914675        0.000000000301826                      0.0                      0.0                      0.0      -43.267293943031376        1.922228496500636        2.678825092612998     -259.438542194321770        0.000221453458150    16058.442527201638000  4993324.971154000600000  1119939.599722950700000      221.453458149717190      236.082540462942090    89666.753224759857000    27171.366643396836000       69.330680219423073       44.516377650303305       47.456960961603585    -4367.324290915358700    18780.586170488976000     2623.874060650320600      275.245901639344250        7.000000000000000       34.781206032547068    18675.244812975179000     1398.164930724968800     9818.745617644890400                      0.0        0.000000000253661                      0.0                      0.0                      0.0                      0.0                      0.0                      0.0                      0.0        0.000001800000000        0.000000600000000
      200.590123123191800                      0.0                      0.0        0.000005919851083        0.000048323421665        0.000178080368345        0.000010982375357        0.000121472393449        0.000012347632292        0.000067575030040        0.003490406164441        0.000001081667695        0.000010686376956        0.000000000000277        0.000039264696438        0.015661148549330        0.244029246904968        0.030556809911931        0.000061781416165        0.000634870059247        0.000010982375357        0.000000882202713        0.000000060968135        0.000000000105570        0.000000000000000        0.000041042482985        0.000120379018382        0.000001249241217        0.000000000010537        0.000061129284456        0.000013129388282        0.000000000126345        0.000000006316271        0.000000020480635        0.000000004201557        0.000000000198936        0.000000000784020        0.000000000039837        0.000000000000000        0.000000007325481        0.000000000514614        0.000000011565741        0.000000000897966        0.000000000008516        0.000000001402591        0.000000000008393        0.000000001811719        0.000000000086073        0.000000000000000        0.000676346315763        0.001656031412728        0.000000028967766        0.000001400524815        0.000000004949974        0.000000045126468        0.000000051623925        0.000000048560088        0.000000272927594        0.000000000291256                      0.0                      0.0                      0.0      -42.833737128508545        1.837414186875058        2.724054455319518     -218.092112822967610        0.000220176703489    16601.738309300945000  4983355.134392853800000  1125557.204291322300000      220.176703489228630      234.434919722202890    89654.948420779896000    27175.990313350092000       65.625578596501413       42.482720382472557       45.237692528042921    -4324.552244000992700    19037.173765980937000     2638.567273661713900      275.261294191761690        7.000000000000000       36.422051809736423    17659.937408468817000     1673.065088960142000     9817.630991760015600                      0.0        0.000000000174589                      0.0                      0.0                      0.0                      0.0                      0.0                      0.0                      0.0        0.000001800000000        0.000000600000000
      200.590907570098750        0.000000000000821        0.000000000002572        0.000005590710172        0.000045668566817        0.000168561956595        0.000010384723132        0.000114925276583        0.000011675319584        0.000063894957614        0.003303523652944        0.000001021355298        0.000010095976282        0.000000000000259        0.000037134155473        0.014823906578585        0.231023589196740        0.028929664680609        0.000058280097906        0.000600950128203        0.000010384723132        0.000000832880085        0.000000056900766        0.000000000098515        0.000000000000000        0.000038789712201        0.000113907827048        0.000001180493339        0.000000000009617        0.000057839772920        0.000012412823364        0.000000000118045        0.000000005896195        0.000000019125255        0.000000003922020        0.000000000185785        0.000000000732359        0.000000000037214        0.000000000000000        0.000000006842139        0.000000000480752        0.000000010801780        0.000000000838787        0.000000000007955        0.000000001310028        0.000000000007840        0.000000001692103        0.000000000080434        0.000000000000000        0.000640088769191        0.001566879244821        0.000000027044318        0.000001320679403        0.000000004620605        0.000000042126075        0.000000048220508        0.000000045331647        0.000000254851763        0.000000000272107                      0.0                      0.0                      0.0      -42.350234974256153        1.509634608598745        2.732825777220111     -158.335324114220610        0.000147707838156    17646.066618354635000  4973128.538975642100000  1128404.240526933200000      147.707838156258790      155.705956548891350    89636.159843713394000    27198.778271446183000       41.170819436427863       27.204342313170486       28.684474293862294    -4274.831408217955900    18870.328087507929000     2632.073167817651700      275.250136476863080        7.000000000000000       38.262708567320601    18778.187145851702000     1773.097088584378300     9812.140830514223100                      0.0        0.000000000341287                      0.0                      0.0                      0.0                      0.0                      0.0                      0.0                      0.0        0.000001800000000        0.000000600000000
      200.591692017005700                      0.0                      0.0        0.000005512091188        0.000045066160199        0.000166540522465        0.000010261536665        0.000113437609723        0.000011519314100        0.000063082419059        0.003263956810697        0.000001007068285        0.000009964660266        0.000000000000252        0.000036661739333        0.014644102378759        0.228311226040852        0.028589730299631        0.000057396005646        0.000593711754092        0.000010261536665        0.000000821024791        0.000000055476847        0.000000000096085        0.000000000000000        0.000038273501326        0.000112477012965        0.000001163835409        0.000000000009183        0.000057126542218        0.000012246866880        0.000000000115245        0.000000005751743        0.000000018658258        0.000000003825422        0.000000000181158        0.000000000714697        0.000000000036321        0.000000000000000        0.000000006676781        0.000000000469230        0.000000010545809        0.000000000818540        0.000000000007763        0.000000001277612        0.000000000007652        0.000000001650715        0.000000000078507        0.000000000000000        0.000632371200757        0.001547130959560        0.000000026375136        0.000001300850033        0.000000004506063        0.000000041087122        0.000000047062700        0.000000044215939        0.000000248604115        0.000000000265566        0.000000106708780        0.000000000980904        0.000000000039326      -42.024844979161664        1.278605835304166        2.725669869245973      -33.659103980544046        0.000091078955080    17690.410198929745000  4962731.252631919500000  1129270.274903215000000       91.078955080433602       94.257474780878283    89624.492408018719000    27188.941912811002000       23.599247201651405       16.102706736615978       16.666001512741307    -4252.780261190439900    18615.205252598927000     2607.765411580910500      275.252185041274740        7.487552157897953       42.379936726030259    18200.819250315017000     1533.474689230278000     9814.509998156816400        0.000000000116703        0.000000000552622                      0.0                      0.0        0.721805045527746                      0.0                      0.0                      0.0        0.261447392652448        0.000001800000000        0.000000600000000
      200.592476463912590                      0.0                      0.0        0.000005603601768        0.000045853753050        0.000169607459721        0.000010447624161        0.000115641698424        0.000011737711975        0.000064219942834        0.003325420270977        0.000001023748362        0.000010136024136        0.000000000000253        0.000037317984897        0.014923857197469        0.232668607462789        0.029137733147548        0.000058271619482        0.000605010248417        0.000010447624161        0.000000834529440        0.000000055754159        0.000000000096573        0.000000000000000        0.000038941157018        0.000114651382250        0.000001184218035        0.000000000009030        0.000058190434637        0.000012468043373        0.000000000115910        0.000000005782130        0.000000018765843        0.000000003846872        0.000000000182205        0.000000000718968        0.000000000036544        0.000000000000000        0.000000006716190        0.000000000472060        0.000000010606315        0.000000000823413        0.000000000007809        0.000000001285043        0.000000000007697        0.000000001660802        0.000000000078994        0.000000000000000        0.000644148105574        0.001575806212556        0.000000026521269        0.000001321453280        0.000000004530313        0.000000041309102        0.000000047344123        0.000000044445015        0.000000250030912        0.000000000267178        0.000000102151760        0.000000000963233        0.000000000022653      -42.168114258542275        1.226855686343949        2.710950997396688       57.110400414634569        0.000076267782892    17333.702325023554000  4952332.590748690100000  1130631.292337161300000       76.267782892484050       78.188058356171283    89621.987287916796000    27181.424439859740000       19.804988942755489       13.649426387079520       13.992050595908861    -4253.947848592910300    18531.754377858466000     2604.912498878521500      275.367571044444840        7.941788948361519       44.440954945903364    16927.587707042283000     1369.061619482942700     9816.332603296301400        0.000000000112183        0.000000000293378                      0.0        7.651507722713002        0.641392485570554                      0.0                      0.0                      0.0        0.278632225911546        0.000001800000000        0.000000600000000
      200.593260910819510                      0.0                      0.0        0.000005674339910        0.000046468380585        0.000172180516776        0.000010594053211        0.000117356379595        0.000011896360491        0.000065122379497        0.003374776389797        0.000001035772046        0.000010267037427        0.000000000000254        0.000037840250360        0.015144918626128        0.236170592190112        0.029574415217960        0.000058924379662        0.000614066902880        0.000010594053211        0.000000844910868        0.000000055775223        0.000000000096612        0.000000000000000        0.000039469439837        0.000116381971663        0.000001199222873        0.000000000008827        0.000059033156475        0.000012645874787        0.000000000116066        0.000000005786311        0.000000018778498        0.000000003849733        0.000000000182575        0.000000000719962        0.000000000036592        0.000000000000000        0.000000006723922        0.000000000472721        0.000000010611454        0.000000000824492        0.000000000007819        0.000000001288169        0.000000000007707        0.000000001662912        0.000000000079116        0.000000000000000        0.000653709223842        0.001600040440446        0.000000026540170        0.000001335694943        0.000000004532666        0.000000041333073        0.000000047417111        0.000000044473805        0.000000250267886        0.000000000267486        0.000000100982233        0.000000000943864        0.000000000011997      -42.090143822180444        1.215001723383280        2.720407990407530       50.152430091234677        0.000075018942416    17170.625830447207000  4941940.548173551400000  1132728.236210258000000       75.018942415942888       76.831872383667616    89620.608220018359000    27185.085165758086000       19.243095294081854       13.324542614399009       13.646105704460000    -4244.431634946528000    18593.992082058568000     2601.290450043064100      275.393442622950830        8.000000000000000       45.021774667824708    16346.415995819159000     1329.454035886012400     9815.446588059425300        0.000000000116646        0.000000000014174                      0.0        8.200642160823421        0.602053692121536                      0.0                      0.0                      0.0        0.292275512817734        0.000001800000000        0.000000600000000
      200.594045357726400                      0.0                      0.0        0.000005735236676        0.000047005599324        0.000174466714017        0.000010721480852        0.000118844647910        0.000012041583992        0.000065918187033        0.003419006411486        0.000001046954132        0.000010385934758        0.000000000000253        0.000038302405324        0.015345809385294        0.239353653689329        0.029963576758298        0.000059491114422        0.000622053263444        0.000010721480852        0.000000853809245        0.000000055679707        0.000000000096451        0.000000000000000        0.000039927861287        0.000117924883525        0.000001212941973        0.000000000008608        0.000059787382029        0.000012797925865        0.000000000116004        0.000000005778808        0.000000018753517        0.000000003844301        0.000000000182388        0.000000000719465        0.000000000036570        0.000000000000000        0.000000006718092        0.000000000472439        0.000000010607777        0.000000000823878        0.000000000007813        0.000000001287482        0.000000000007702        0.000000001661909        0.000000000079083        0.000000000000000        0.000662193031149        0.001621466184431        0.000000026504606        0.000001348093204        0.000000004526554        0.000000041276063        0.000000047387111        0.000000044409458        0.000000250035668        0.000000000267322        0.000000104111376        0.000000000906227        0.000000000019089      -42.079447350811193        1.231655083717342        2.717888797584414       -2.600562556444453        0.000078427539538    17176.840274029237000  4931537.118992089300000  1135070.506910543700000       78.427539537514363       80.532508954209192    89593.369876635508000    27178.786469714814000       20.216815366465372       13.931129547433951       14.306138801064543    -4235.715711302462300    18559.885097418781000     2578.894346532350000      275.352491762634370        7.751306461862888       43.678223641118976    16974.663642516400000     1297.974282917260100     9816.977789547998300        0.000000000128759       -0.000000000321319                      0.0        6.229811940834420        0.615952072528069                      0.0                      0.0                      0.0        0.292085861022550        0.000001800000000        0.000000600000000
      200.594829804633350        0.000000000000728        0.000000000002745        0.000005875697775        0.000047471008958        0.000172809687340        0.000010669066081        0.000118265409272        0.000011997681257        0.000065570849642        0.003385622421234        0.000001068679511        0.000010438855276        0.000000000000339        0.000038149399132        0.015182559179582        0.237014232434946        0.029665669088727        0.000060948842771        0.000616375532640        0.000010669066081        0.000000880533049        0.000000074818792        0.000000000115238        0.000000000000000        0.000039921604867        0.000116803819502        0.000001219814703        0.000000000016821        0.000059368775392        0.000012768026365        0.000000000154186        0.000000007740496        0.000000025097896        0.000000005148969        0.000000000243263        0.000000000957146        0.000000000048695        0.000000000000000        0.000000008947173        0.000000000628251        0.000000014148510        0.000000001096455        0.000000000010402        0.000000001713139        0.000000000010259        0.000000002213745        0.000000000104993        0.000000000000000        0.000656259491853        0.001606601904101        0.000000035505330        0.000001416809307        0.000000006071410        0.000000055330711        0.000000061548366        0.000000059562185        0.000000332787093        0.000000000355965        0.000000106839487        0.000000000895117        0.000000000018611      -43.121395280356737        1.324669768427795        2.644573043386334      -81.120171212507216        0.000086898650059    17193.678748453116000  4921135.066793290900000  1137516.801029808800000       86.898650058638751       89.749850243191233    89009.864071553864000    26695.002212304469000       25.386785213856331       16.904211825464650       17.458153955657419    -4356.596065275033700    18322.352238955446000     2555.874199603681100      275.059538146692200        7.000000000000000       36.030314467548543    18001.961606013727000     1127.102719138334400     9935.240761598448400        0.000000000097849       -0.000000000493665                      0.0        5.720963230127131        0.638657483793992                      0.0                      0.0                      0.0        0.279245456913550        0.000001800000000        0.000000600000000
      200.595614251540300        0.000000000000637        0.000000000002104        0.000006281454790        0.000049757021848        0.000176222167856        0.000010917623415        0.000121402919271        0.000012313142935        0.000067247556849        0.003446370847981        0.000001139038161        0.000010860161657        0.000000000000479        0.000039179569537        0.015465321668129        0.241178149397612        0.030202695849206        0.000065204705760        0.000628059885447        0.000010917623415        0.000000949671215        0.000000105874471        0.000000000147213        0.000000000000000        0.000041256290005        0.000119187425230        0.000001270526075        0.000000000029236        0.000060693389978        0.000013166918658        0.000000000216018        0.000000010916010        0.000000035321629        0.000000007254292        0.000000000341517        0.000000001343308        0.000000000068296        0.000000000000000        0.000000012570080        0.000000000880220        0.000000019853981        0.000000001538734        0.000000000014586        0.000000002401340        0.000000000014371        0.000000003106885        0.000000000146700        0.000000000000000        0.000668924301639        0.001637623651170        0.000000050033505        0.000001567160669        0.000000008561719        0.000000078001413        0.000000084596283        0.000000084010200        0.000000466629247        0.000000000499262        0.000000110137883        0.000000000885256        0.000000000029803      -43.963190506753691        1.324012545452241        2.595346598440740     -173.921747459545120        0.000080022008981    17204.677282828143000  4910823.419287564200000  1140116.349551182700000       80.022008980737283       82.216578759056361    88419.289797593388000    25895.627199520644000       25.053947847549196       16.486592825084465       16.935547637122998    -4425.469156541345000    18242.234567591080000     2543.222627946087900      275.253810265650430        7.000000000000000       33.989927632746955    19322.510335763000000     1131.590856916276400    10133.469548654723000        0.000000000147110       -0.000000000497054                      0.0        6.517549534976898        0.703528668686622                      0.0                      0.0                      0.0        0.271764632384363        0.000001800000000        0.000000600000000
      200.596396007795480        0.000000000000625        0.000000000002376        0.000006182741428        0.000048900556381        0.000172822381317        0.000010704018083        0.000119148155540        0.000012072769446        0.000065944384564        0.003378678614620        0.000001120536405        0.000010660140350        0.000000000000480        0.000038423638026        0.015168583536211        0.236488545832893        0.029613767596869        0.000064117915863        0.000615887307729        0.000010704018083        0.000000935061861        0.000000106200843        0.000000000146170        0.000000000000000        0.000040473999133        0.000116852432636        0.000001246874873        0.000000000029194        0.000059514127063        0.000012913203302        0.000000000216656        0.000000010939359        0.000000035422215        0.000000007275394        0.000000000342497        0.000000001347673        0.000000000068504        0.000000000000000        0.000000012606855        0.000000000882797        0.000000019907659        0.000000001542905        0.000000000014636        0.000000002408864        0.000000000014413        0.000000003116460        0.000000000147160        0.000000000000000        0.000655865317672        0.001605340787383        0.000000050178369        0.000001546163169        0.000000008585420        0.000000078213537        0.000000084659638        0.000000084240543        0.000000467861644        0.000000000500724        0.000000106962051        0.000000000851301        0.000000000036795      -44.885732335945271        1.302302020481087        2.546496690979837     -251.381004868214010        0.000068767933412    17194.786358031717000  4900521.032791134900000  1142924.394582685500000       68.767933411717593       69.951124999516537    87999.476443025676000    25271.539260977072000       23.490483052307340       15.305840702435130       15.569091736907902    -4523.415842317607700    18210.687161302267000     2547.144832192483100      275.345295678738580        7.000000000000000       31.439272135886224    20582.302659179306000     1121.108539271783500    10291.847341952731000        0.000000000135285       -0.000000000404011                      0.0        7.623856991041098        0.854385683538776                      0.0                      0.0                      0.0        0.292218773462833        0.000001800000000        0.000000600000000
      200.597178640506540        0.000000000000639        0.000000000001728        0.000005786838205        0.000045818771104        0.000162111740540        0.000010034231882        0.000111798234953        0.000011312724182        0.000061822658846        0.003170515805757        0.000001048189650        0.000009980687142        0.000000000000444        0.000036019979829        0.014228911566091        0.221970781778774        0.027805136513544        0.000059920410448        0.000577995480966        0.000010034231882        0.000000874381173        0.000000098172300        0.000000000134924        0.000000000000000        0.000037921277769        0.000109715129729        0.000001167857168        0.000000000026319        0.000055820838028        0.000012103343321        0.000000000200442        0.000000010115255        0.000000032764620        0.000000006727751        0.000000000316885        0.000000001247036        0.000000000063399        0.000000000000000        0.000000011659496        0.000000000817062        0.000000018424067        0.000000001427341        0.000000000013543        0.000000002229816        0.000000000013340        0.000000002883327        0.000000000136198        0.000000000000000        0.000615397566393        0.001506752689310        0.000000046389872        0.000001444323504        0.000000007938218        0.000000072326008        0.000000078307406        0.000000077890102        0.000000432732045        0.000000000463390        0.000000107717515        0.000000000847219        0.000000000042908      -44.783129757482456        1.266840841199048        2.561518754542780     -200.362848779829190        0.000065718577635    16206.401798023409000  4890255.588219377200000  1146514.782012440300000       65.718577635071711       66.493754572340876    87678.558574606752000    24826.605678812062000       21.588540295267482       14.191073932220917       14.357227919957941    -4508.491540420349300    18321.367249946583000     2538.966295672060400      275.414988631772590        7.000000000000000       32.461271737591240    22014.779866415643000     1012.657368427698700    10406.376607985263000        0.000000000150704       -0.000000000273280                      0.0        5.304115794702944        0.832635301181746                      0.0                      0.0                      0.0        0.324630013941907        0.000001800000000        0.000000600000000
      200.597937962524550        0.000000000000750        0.000000000002429        0.000005853833754        0.000046401821612        0.000164526695078        0.000010174647552        0.000113343766542        0.000011470703440        0.000062660597001        0.003217295634219        0.000001058952101        0.000010105229884        0.000000000000442        0.000036511849108        0.014437345700698        0.225318556686974        0.028219428835534        0.000060501560400        0.000586606442855        0.000010174647552        0.000000883389522        0.000000097736713        0.000000000134192        0.000000000000000        0.000038408570419        0.000111233527410        0.000001181373060        0.000000000025395        0.000056626527698        0.000012268137460        0.000000000199874        0.000000010090854        0.000000032640653        0.000000006701214        0.000000000315791        0.000000001242055        0.000000000063219        0.000000000000000        0.000000011596436        0.000000000814792        0.000000018380353        0.000000001421889        0.000000000013492        0.000000002221810        0.000000000013292        0.000000002875405        0.000000000135912        0.000000000000000        0.000624417794327        0.001529054106811        0.000000046217750        0.000001456001281        0.000000007905907        0.000000072045787        0.000000078022171        0.000000077584110        0.000000431246161        0.000000000461973        0.000000113428773        0.000000000784330        0.000000000027608      -44.696125059045436        1.292393797379328        2.588094097365908      174.937212173105420        0.000075143732972    11512.396431577628000  4883247.915491630300000  1156037.681593607900000       75.143732971969186       76.719930969575699    87519.784722306373000    24726.056618404564000       24.468536380889830       16.052692842354713       16.391281893137762    -4497.095378503286200    18568.374329157941000     2519.377673452281700      275.450190819101860        7.000000000000000       32.838689145543384    26147.244245716563000     1468.633383022543500    10432.473522099719000        0.000000000168301       -0.000000000209829                      0.0                      0.0                      0.0                      0.0                      0.0                      0.0                      0.0        0.000001800000000        0.000000600000000
      200.598751886552120        0.000000000000754        0.000000000002465        0.000005874067737        0.000046650145622        0.000165987284743        0.000010255814693        0.000114178942583        0.000011554208449        0.000063075168129        0.003245259607632        0.000001061043428        0.000010159646866        0.000000000000433        0.000036742851874        0.014563805010487        0.227433221364760        0.028478079733111        0.000060542445401        0.000591602485304        0.000010255814693        0.000000884820649        0.000000095704930        0.000000000131172        0.000000000000000        0.000038612238385        0.000112066951713        0.000001186523256        0.000000000023686        0.000057062201016        0.000012348037851        0.000000000196173        0.000000009880442        0.000000032001002        0.000000006567516        0.000000000309779        0.000000001220782        0.000000000062046        0.000000000000000        0.000000011403103        0.000000000799784        0.000000018014237        0.000000001396998        0.000000000013243        0.000000002181597        0.000000000013044        0.000000002820132        0.000000000133382        0.000000000000000        0.000629516464377        0.001541979133254        0.000000045291598        0.000001453357830        0.000000007746808        0.000000070592664        0.000000076500999        0.000000076009057        0.000000422820197        0.000000000453415        0.000000118803020        0.000000000740887        0.000000000048436      -44.650057503255375        1.324655603823219        2.615545882462332      229.233749566870220        0.000086500004907     7383.962761594778400  4883552.106249602500000  1174162.273243619400000       86.500004907313851       89.070429495662339    87489.939984660654000    24729.710070541849000       28.052162473977951       18.361402337762470       18.906868095221764    -4502.229576019839400    18843.924975898808000     2508.831668457371500      275.442622950819670        7.000000000000000       32.932272751169833    27164.175558974559000     2427.840130473026900    10431.542962242760000        0.000000000168938       -0.000000000153148                      0.0                      0.0                      0.0                      0.0                      0.0                      0.0                      0.0        0.000001800000000        0.000000600000000
      200.599531990346350        0.000000000000809        0.000000000002342        0.000005583378542        0.000044427033077        0.000158489346462        0.000009776752033        0.000109104937167        0.000011009767475        0.000060147207800        0.003100487792025        0.000001007764082        0.000009661143011        0.000000000000402        0.000035031205328        0.013919118825353        0.217341242199752        0.027219379891321        0.000057389819319        0.000565304634995        0.000009776752033        0.000000839696567        0.000000088718653        0.000000000121444        0.000000000000000        0.000036770769085        0.000107200327589        0.000001128898395        0.000000000020886        0.000054474649096        0.000011762732408        0.000000000182384        0.000000009163909        0.000000029692168        0.000000006093674        0.000000000287708        0.000000001133914        0.000000000057648        0.000000000000000        0.000000010597598        0.000000000743189        0.000000016727280        0.000000001297577        0.000000000012308        0.000000002026640        0.000000000012123        0.000000002619050        0.000000000124025        0.000000000000000        0.000601359747480        0.001472288139802        0.000000042019527        0.000001376177441        0.000000007185227        0.000000065480131        0.000000071000164        0.000000070500164        0.000000392451850        0.000000000421269        0.000000127634642        0.000000000688969        0.000000000060265      -44.219119988885026        1.296607746409141        2.657057547559202      131.036676218533730        0.000088209349472     6741.704918755931400  4887979.616405608100000  1192822.537240759000000       88.209349472430347       90.868509811629906    87497.717307239174000    24742.789002266978000       27.014477974404887       17.895177517038320       18.434307614196754    -4459.357940179479600    19060.561923770343000     2509.347311033071000      275.416520308559090        7.000000000000000       34.537665266401532    25690.647494311645000     2732.503046254027100    10428.126043215161000        0.000000000181391       -0.000000000131805                      0.0                      0.0                      0.0                      0.0                      0.0                      0.0                      0.0        0.000001800000000        0.000000600000000
      200.600325707158390        0.000000000000922        0.000000000002077        0.000005251113808        0.000041868506679        0.000149886212467        0.000009228818258        0.000103110351262        0.000010390236427        0.000056752386308        0.002931512382628        0.000000946961930        0.000009096565121        0.000000000000368        0.000033053071785        0.013162075505118        0.205580695764415        0.025745727107815        0.000053807308565        0.000534527607182        0.000009228818258        0.000000788279679        0.000000081233075        0.000000000111005        0.000000000000000        0.000034650778393        0.000101338205099        0.000001062334869        0.000000000018133        0.000051463989804        0.000011092201154        0.000000000167424        0.000000008398557        0.000000027216960        0.000000005585190        0.000000000263949        0.000000001040734        0.000000000052926        0.000000000000000        0.000000009721564        0.000000000682304        0.000000015347646        0.000000001190772        0.000000000011297        0.000000001860121        0.000000000011124        0.000000002403218        0.000000000113898        0.000000000000000        0.000568459720322        0.001391210131074        0.000000038510371        0.000001287866038        0.000000006583646        0.000000060006290        0.000000065109335        0.000000064599833        0.000000359843211        0.000000000386639        0.000000124567248        0.000000000670260        0.000000000061770      -44.414625367993160        1.282166289238639        2.661653375849546      358.763211509033680        0.000085569534164     6327.309682255277900  4893039.801256423800000  1211878.730044693700000       85.569534164238007       88.006025291076142    87504.061327803647000    24736.191147907597000       26.718127394780367       17.718531377500383       18.222129429710531    -4469.613928521695900    19214.064537726401000     2530.857785561569900      275.470186614871300        7.000000000000000       33.829111288932630    26101.895400177211000     2978.326685709766000    10429.829025493684000        0.000000000245755       -0.000000000058966                      0.0                      0.0                      0.0                      0.0                      0.0                      0.0                      0.0        0.000001800000000        0.000000600000000
      200.601127076757190        0.000000000000670        0.000000000002375        0.000004871781814        0.000038918174067        0.000139746419278        0.000008593527107        0.000096039901019        0.000009673050495        0.000052824817134        0.002733584489126        0.000000877711132        0.000008449673571        0.000000000000333        0.000030761525097        0.012271199512528        0.191794274998366        0.024018546669878        0.000049777830318        0.000498515727869        0.000008593527107        0.000000730134635        0.000000073453893        0.000000000100179        0.000000000000000        0.000032211469635        0.000094483582745        0.000000986595565        0.000000000015573        0.000047956442882        0.000010321568949        0.000000000151769        0.000000007601072        0.000000024639406        0.000000005054624        0.000000000239171        0.000000000943259        0.000000000047981        0.000000000000000        0.000000008808289        0.000000000618546        0.000000013904132        0.000000001078989        0.000000000010240        0.000000001686031        0.000000000010083        0.000000002177930        0.000000000103318        0.000000000000000        0.000530053981179        0.001297253942604        0.000000034854754        0.000001189095566        0.000000005956918        0.000000054300756        0.000000058964235        0.000000058450543        0.000000325819033        0.000000000350432        0.000000126973672        0.000000000634681        0.000000000073695      -44.191550893550627        1.288672388980258        2.644127751914429      678.385157033552670        0.000084280361897     3352.100130496557100  4901083.051592035200000  1227952.093300594900000       84.280361897324951       86.591571721954693    87498.495331106693000    24729.464902855612000       25.693824413828906       17.033225290964953       17.499876300892225    -4449.119074629233200    18905.940638902390000     2550.811772769923700      275.439898335000120        7.004541026365877       34.791106038326973    25744.611020355740000     3379.982224339025400    10431.585262486169000        0.000000000347246        0.000000000088743                      0.0        6.027160968484004        0.851584881431279                      0.0                      0.0                      0.0        0.280710434395300        0.000001800000000        0.000000600000000
      200.601914984225690        0.000000000000719        0.000000000002259        0.000004009592334        0.000032091684890        0.000115626313110        0.000007098185779        0.000079424915420        0.000007987350410        0.000043610383254        0.002260626151350        0.000000721746545        0.000006962523098        0.000000000000268        0.000025395403215        0.010152993119791        0.158782825623807        0.019886695390354        0.000040859991704        0.000412409062877        0.000007098185779        0.000000600068079        0.000000058977831        0.000000000080313        0.000000000000000        0.000026554551082        0.000078147180100        0.000000812907250        0.000000000011900        0.000039638409885        0.000008516837159        0.000000000122157        0.000000006108540        0.000000019803718        0.000000004062160        0.000000000192367        0.000000000759145        0.000000000038613        0.000000000000000        0.000000007086624        0.000000000497815        0.000000011185341        0.000000000868220        0.000000000008237        0.000000001356409        0.000000000008116        0.000000001751894        0.000000000083164        0.000000000000000        0.000438349783482        0.001072998297033        0.000000028005010        0.000000974758254        0.000000004785863        0.000000043632585        0.000000047408203        0.000000046964320        0.000000262005374        0.000000000281979        0.000000125952082        0.000000000612232        0.000000000079987      -43.882769397900574        1.286449617154844        2.641918209681450      704.002663611618460        0.000083531173855     2865.699850348502900  4911697.995492733100000  1239438.411595296800000       83.531173854863582       85.769654499855264    87514.152705385044000    24749.196770889954000       24.605466868805049       16.361225710172864       16.799758739265329    -4420.265936959297500    18712.722974863133000     2548.699369478726600      275.407490778150530        7.067919057915062       36.184695516121465    25367.646037954815000     3177.798197470307500    10426.444007304955000        0.000000000224973        0.000000000299500                      0.0                      0.0        0.848381336026092                      0.0                      0.0                      0.0        0.299775807022946        0.000001800000000        0.000000600000000
      200.602706264931810        0.000000000000601        0.000000000002414        0.000005153165198        0.000041340148028        0.000149403322956        0.000009156979261        0.000102648398625        0.000010299125108        0.000056239397087        0.002922757479806        0.000000926569676        0.000008960251392        0.000000000000335        0.000032754008428        0.013120594381027        0.205272850132766        0.025707451057669        0.000052346568958        0.000532995948686        0.000009156979261        0.000000770141448        0.000000073748127        0.000000000100261        0.000000000000000        0.000034205295576        0.000101001305026        0.000001045659481        0.000000000014087        0.000051186495981        0.000010979703320        0.000000000153120        0.000000007646137        0.000000024795829        0.000000005084959        0.000000000240995        0.000000000951825        0.000000000048413        0.000000000000000        0.000000008878695        0.000000000624290        0.000000014015581        0.000000001088313        0.000000000010323        0.000000001700103        0.000000000010178        0.000000002195370        0.000000000104303        0.000000000000000        0.000566340803226        0.001386545720416        0.000000035055980        0.000001247096001        0.000000005989624        0.000000054608433        0.000000059376547        0.000000058773688        0.000000328126663        0.000000000353509        0.000000118313114        0.000000000661314        0.000000000073891      -44.563249900471895        1.521313465503836        2.587112457547992      758.499624459369780        0.000121993232473     2898.902977215894200  4922298.113295049400000  1250824.797391889400000      121.993232473053080      127.832722868845220    87537.080196739451000    24773.336887104804000       39.815792129625322       25.534401746106418       26.749035100085507    -4485.531226466479900    18484.659482809526000     2536.354847162523100      275.475409836065580        7.000000000000000       33.277593083502218    25374.436549350310000     3426.201613120525500    10420.161977102289000        0.000000000155179        0.000000000543911                      0.0                      0.0        0.870601533319960        0.392951753576234                      0.0                      0.0        0.284988985629994        0.000001800000000        0.000000600000000
      200.603502880856130        0.000000000000958        0.000000000003350        0.000007581019953        0.000060917553014        0.000220814828348        0.000013521224639        0.000151556954383        0.000015201153943        0.000082983351423        0.004320319594645        0.000001362481327        0.000013192425203        0.000000000000482        0.000048318836571        0.019398939290138        0.303581344728567        0.038018791234033        0.000076796596815        0.000788000107465        0.000013521224639        0.000001131643904        0.000000105957691        0.000000000143734        0.000000000000000        0.000050410861417        0.000149260986146        0.000001539565983        0.000000000019278        0.000075605725655        0.000016191938266        0.000000000220472        0.000000010989664        0.000000035641738        0.000000007308179        0.000000000346617        0.000000001369885        0.000000000069680        0.000000000000000        0.000000012782012        0.000000000898582        0.000000020156315        0.000000001566487        0.000000000014858        0.000000002447240        0.000000000014643        0.000000003158720        0.000000000150128        0.000000000000000        0.000836952261660        0.002049140727158        0.000000050387685        0.000001828910246        0.000000008606177        0.000000078478514        0.000000085386224        0.000000084435271        0.000000471742154        0.000000000508797        0.000000115030858        0.000000000757643        0.000000000090283      -44.219753216020536        2.070418570836437        2.598510573975922      905.641408788323020        0.000238819014694     9578.738563809622100  4932994.466572433700000  1261558.975746207200000      238.819014694353200      255.198643869177150    87543.554962921975000    24762.595988342055000       76.130980498424208       48.118570535316699       51.412151593324680    -4451.912909073683300    18420.139363962313000     2496.029538330509700      275.489195864536670        7.000000000000000       34.492399841569203    25494.871451009923000     3468.793603634906000    10422.962719895522000        0.000000000264296                      0.0                      0.0                      0.0        1.332057756107384        0.455953606489402                      0.0                      0.0        0.267680260750115        0.000001800000000        0.000000600000000
      200.604289547190150                      0.0                      0.0        0.000007707014125        0.000062023704969        0.000225431042306        0.000013787803090        0.000154678327325        0.000015496183058        0.000084578961008        0.004411043877852        0.000001383983561        0.000013427823751        0.000000000000480        0.000049254239538        0.019808829630891        0.310164198330225        0.038833479608172        0.000077891782568        0.000804614630546        0.000013787803090        0.000001149038041        0.000000105429952        0.000000000142916        0.000000000000000        0.000051328534798        0.000152380563123        0.000001566601679        0.000000000018389        0.000077147323734        0.000016497719100        0.000000000219912        0.000000010948435        0.000000035507733        0.000000007278903        0.000000000345537        0.000000001366028        0.000000000069491        0.000000000000000        0.000000012739074        0.000000000896309        0.000000020097283        0.000000001561793        0.000000000014804        0.000000002440680        0.000000000014598        0.000000003149074        0.000000000149869        0.000000000000000        0.000854278547874        0.002091341278761        0.000000050184111        0.000001852078651        0.000000008570476        0.000000078171359        0.000000085098273        0.000000084090235        0.000000470014173        0.000000000507406        0.000000103489440        0.000000000960789        0.000000000168446      -44.270169279908934        2.451483743443676        2.578180059708159     1025.637717514272000        0.000305016675747    27335.709665690032000  4944319.231440853300000  1266378.350468766400000      305.016675747064480      327.711625567521250    87540.221579854784000    24762.822020250089000       99.459959111147626       62.383914492535688       67.031648693244875    -4450.636256090174400    18221.160152407338000     2467.221316698593500      275.464368614313510        7.000000000000000       34.290576366934040    24581.371502720365000     3205.645111913923800    10422.902000819202000        0.000000000852392                      0.0        5.787762337858945                      0.0        2.200588897099639        0.524473281362268                      0.0                      0.0        0.350304616519696        0.000001800000000        0.000000600000000
      200.605076213524140        0.000000000002821        0.000000000003949        0.000007491132817        0.000060382411620        0.000219977039409        0.000013433654606        0.000150845856035        0.000015101289894        0.000082415978273        0.004305286669450        0.000001344766591        0.000013064717044        0.000000000000457        0.000047988140611        0.019331154951894        0.302791512546511        0.037909310954334        0.000075536324058        0.000785199439710        0.000013433654606        0.000001116100307        0.000000100428635        0.000000000135960        0.000000000000000        0.000049967323300        0.000148668276694        0.000001524425969        0.000000000016819        0.000075240744831        0.000016068876076        0.000000000209895        0.000000010434202        0.000000033849365        0.000000006938806        0.000000000329611        0.000000001303513        0.000000000066314        0.000000000000000        0.000000012152482        0.000000000855348        0.000000019171019        0.000000001490528        0.000000000014125        0.000000002328583        0.000000000013928        0.000000003003861        0.000000000143057        0.000000000000000        0.000833520831809        0.002040582533213        0.000000047837569        0.000001795146832        0.000000008167287        0.000000074491240        0.000000081153130        0.000000080139845        0.000000448240422        0.000000000484181        0.000000092969946        0.000000001206948        0.000000000396266      -44.752396854871790        2.526971769532239        2.573649131447438     1117.619526358960700        0.000316014076527    34823.441576473888000  4956220.182597631600000  1266026.571155515700000      316.014076527223950      339.796644059577720    87534.302805534418000    24760.696585310161000      108.982142386013270       67.987294593368517       73.105762502778731    -4503.487820967279700    18439.082792182238000     2447.102971667614800      275.426229508196740        7.000000000000000       32.577959655673588    24293.139356481046000     3322.447454663353700    10423.438696926922000        0.000000001263297                      0.0        6.589696340414837                      0.0        2.845798036753071        0.571279131331115                      0.0                      0.0        0.394411563164142        0.000001800000000        0.000000600000000
      200.605857251915070        0.000000000002416        0.000000000006044        0.000008455316013        0.000068253514177        0.000249233912533        0.000015210811268        0.000170868891847        0.000017084830623        0.000093245584080        0.004877984541495        0.000001516543106        0.000014759326971        0.000000000000506        0.000054290946044        0.021902072867069        0.343109959279632        0.042969613836356        0.000085073384307        0.000889731359272        0.000015210811268        0.000001258593471        0.000000111216051        0.000000000150330        0.000000000000000        0.000056475009346        0.000168431142492        0.000001720976841        0.000000000017918        0.000085201621512        0.000018173426810        0.000000000232778        0.000000011560462        0.000000037507550        0.000000007688402        0.000000000365432        0.000000001445729        0.000000000073554        0.000000000000000        0.000000013472394        0.000000000948775        0.000000021257930        0.000000001652632        0.000000000015671        0.000000002582159        0.000000000015455        0.000000003331044        0.000000000158670        0.000000000000000        0.000944213859732        0.002312132923599        0.000000053003873        0.000002019578460        0.000000009047494        0.000000082533490        0.000000089962034        0.000000088777133        0.000000496841971        0.000000000537001        0.000000087766192        0.000000001425550        0.000000000477033      -45.202246103454215        2.475318263084345        2.580901842391120     1337.054793956056300        0.000308145501495    34881.477794654522000  4968205.233396839400000  1265795.210165656200000      308.145501495227620      331.125689835022400    87521.877595880549000    24731.064180643294000      111.707120784336550       69.446871953054384       74.626342013285623    -4553.333250378485900    18767.117477599579000     2432.851544692518900      275.401469193516960        7.000000000000000       31.053052947940458    24825.433137807056000     4020.566827064652900    10431.161884916821000        0.000000000948456        0.000000001210601        7.138482793098479                      0.0        3.094220132018551        0.560381632955213                      0.0                      0.0        0.390684455047880        0.000001800000000        0.000000600000000
      200.606645570747930        0.000000000003063        0.000000000006484        0.000008327204323        0.000067325447826        0.000246427812438        0.000015014889629        0.000168928567155        0.000016869619422        0.000092058608384        0.004822983108659        0.000001492793119        0.000014550315364        0.000000000000490        0.000053599365058        0.021658762836982        0.339459426100218        0.042505983373665        0.000083611590269        0.000879837256187        0.000015014889629        0.000001238574951        0.000000107443153        0.000000000145024        0.000000000000000        0.000055708973135        0.000166456732988        0.000001696448601        0.000000000016648        0.000084195360025        0.000017931837107        0.000000000225277        0.000000011173586        0.000000036263705        0.000000007432291        0.000000000353527        0.000000001398573        0.000000000071184        0.000000000000000        0.000000013033489        0.000000000918289        0.000000020568225        0.000000001598971        0.000000000015165        0.000000002499029        0.000000000014954        0.000000003222703        0.000000000153641        0.000000000000000        0.000933505538493        0.002286053806350        0.000000051233318        0.000001983317737        0.000000008744485        0.000000079776687        0.000000087015347        0.000000085800597        0.000000480401102        0.000000000519644        0.000000084985255        0.000000001393216        0.000000000470929      -45.240696724494740        2.392374404337746        2.565978598266702     1352.313290721029300        0.000283907666996    34948.157124812940000  4980451.154226823700000  1266213.435578163000000      283.907666996043130      304.861760418931960    87505.948839344273000    24734.710723539698000      103.418718096459760       64.280605635529994       69.025322714632765    -4555.569976126064800    18624.469748718977000     2425.779083367822800      275.450607162183590        7.000000000000000       30.927269266273786    24703.969955753888000     4282.200254400670900    10430.220875763722000        0.000000000841266        0.000000001382013                      0.0                      0.0                      0.0                      0.0                      0.0                      0.0                      0.0        0.000001800000000        0.000000600000000
      200.607431090804910        0.000000000003073        0.000000000006290        0.000007841660171        0.000063494176428        0.000232988043059        0.000014179282396        0.000159663164611        0.000015928313438        0.000086914367086        0.004561057454715        0.000001405014625        0.000013716539923        0.000000000000452        0.000050604313405        0.020481144501138        0.321118432476187        0.040203421895222        0.000078558700985        0.000831987954202        0.000014179282396        0.000001165476664        0.000000099109644        0.000000000133658        0.000000000000000        0.000052544551047        0.000157428443082        0.000001598829809        0.000000000014734        0.000079563400466        0.000016920638050        0.000000000208223        0.000000010317306        0.000000033487095        0.000000006861555        0.000000000326668        0.000000001292630        0.000000000065801        0.000000000000000        0.000000012042469        0.000000000848945        0.000000019002228        0.000000001477607        0.000000000014016        0.000000002309679        0.000000000013824        0.000000002977935        0.000000000142096        0.000000000000000        0.000882552028093        0.002160886406721        0.000000047296552        0.000001862138168        0.000000008071882        0.000000073641996        0.000000080381263        0.000000079195198        0.000000443665987        0.000000000480281        0.000000082974745        0.000000001330237        0.000000000435464      -45.159470507065670        2.343878154870797        2.570456371326584     1177.161363402879500        0.000276916877686    34942.469900785713000  4992699.817214434000000  1266465.460078478300000      276.916877686154240      297.164387549050500    87502.273327526666000    24744.076508777336000       99.841627819386659       62.154614599223237       66.698921875580524    -4546.029797696222900    18629.161270303772000     2454.565008900590300      275.523564897118720        7.000000000000000       31.176995751701487    24342.690386188329000     3868.740894649268700    10427.772544960719000        0.000000000939532        0.000000001500959                      0.0                      0.0                      0.0                      0.0                      0.0                      0.0                      0.0        0.000001800000000        0.000000600000000
      200.608233285546420        0.000000000003327        0.000000000004749        0.000007258573518        0.000058853059789        0.000216500460735        0.000013165291746        0.000148240313628        0.000014789455267        0.000080638276831        0.004238890269615        0.000001299793336        0.000012705081015        0.000000000000410        0.000046949475138        0.019029894502399        0.298499972108554        0.037375723667194        0.000072549540395        0.000773181000090        0.000013165291746        0.000001077617655        0.000000089898694        0.000000000121190        0.000000000000000        0.000048699727484        0.000146259658481        0.000001481151607        0.000000000012838        0.000073893025814        0.000015699155240        0.000000000189282        0.000000009365284        0.000000030402848        0.000000006229156        0.000000000296683        0.000000001175004        0.000000000059800        0.000000000000000        0.000000010944099        0.000000000771611        0.000000017261662        0.000000001342852        0.000000000012733        0.000000002099123        0.000000000012560        0.000000002705630        0.000000000129121        0.000000000000000        0.000819962533443        0.002007446800720        0.000000042936570        0.000001718592046        0.000000007326818        0.000000066849602        0.000000073014221        0.000000071885149        0.000000402922663        0.000000000436451        0.000000083468562        0.000000001245281        0.000000000511906      -45.242004319765293        2.400163672406492        2.555098142987631     1246.919973046768700        0.000279724089027    34855.625448313192000  5005152.577300609100000  1266256.895000023800000      279.724089027154600      300.443512892430530    87511.685919290612000    24749.382391960349000      102.013392154414500       63.369363197138519       68.063924430270433    -2281.898860948992500    18504.590931751183000     2446.068564474664100      275.459595009493110        7.000000000000000       30.932208371016454    24246.404404949775000     3903.044392745062900    10426.403977083806000        0.000000001133020        0.000000001589907                      0.0                      0.0                      0.0                      0.0                      0.0                      0.0                      0.0        0.000001800000000        0.000000600000000
      200.609011180431760        0.000000000002641        0.000000000004476        0.000005712386831        0.000046389366070        0.000171053984741        0.000010390531848        0.000117050884763        0.000011664147978        0.000063610446085        0.003348454649800        0.000001022517813        0.000010008720233        0.000000000000317        0.000037035858856        0.015028847285357        0.235876617320740        0.029540007467452        0.000056967720465        0.000610836799666        0.000010390531848        0.000000847339373        0.000000069367273        0.000000000093381        0.000000000000000        0.000038381931704        0.000115554121976        0.000001166340159        0.000000000009521        0.000058345222488        0.000012381955785        0.000000000146326        0.000000007231604        0.000000023478083        0.000000004810470        0.000000000229275        0.000000000908237        0.000000000046225        0.000000000000000        0.000000008458430        0.000000000596534        0.000000013342351        0.000000001037709        0.000000000009838        0.000000001622544        0.000000000009707        0.000000002090874        0.000000000099848        0.000000000000000        0.000647682969188        0.001585634869591        0.000000033154152        0.000001348855505        0.000000005656418        0.000000051606484        0.000000056410492        0.000000055491748        0.000000311243218        0.000000000337392        0.000000084577949        0.000000001210643        0.000000000561026      -44.756894668402424        2.439548381559232        2.590272420728673     1114.050119245216600        0.000307901598134    32314.714618167931000  5017384.582169859700000  1266211.534238767100000      307.901598134303010      330.691176938056690    87617.804160107087000    25222.856514589766000      105.935588029429650       66.275979529127625       71.192502820101737    -3387.073738078761800    18614.679587056762000     2439.039523272361700      275.329679130014770        7.000000000000000       32.165170997842196    23676.476352025977000     3905.805657733093500    10307.207046661886000        0.000000001234326        0.000000001473131                      0.0                      0.0                      0.0                      0.0                      0.0                      0.0                      0.0        0.000001800000000        0.000000600000000
      200.609794687324610                      0.0                      0.0        0.000003296661856        0.000027901895243        0.000109859738108        0.000006591513636        0.000074085053852        0.000007366651864        0.000040199193695        0.002157919826494        0.000000604044220        0.000006144012217        0.000000000000093        0.000023344759453        0.009690231404851        0.152232961368538        0.019059366199954        0.000032654451140        0.000392941302545        0.000006591513636        0.000000494414619        0.000000020290342        0.000000000035176        0.000000000000000        0.000023824578610        0.000074192533859        0.000000711713546        0.000000000001548        0.000037242699442        0.000007757433439        0.000000000043781        0.000000002132311        0.000000006937824        0.000000001418751        0.000000000068207        0.000000000271034        0.000000000013794        0.000000000000000        0.000000002519116        0.000000000178463        0.000000003969548        0.000000000309746        0.000000000002935        0.000000000484447        0.000000000002900        0.000000000622902        0.000000000029989        0.000000000000000        0.000416080710431        0.001018498759923        0.000000009776522        0.000000749884968        0.000000001664375        0.000000015200129        0.000000018090606        0.000000016332051        0.000000093005076        0.000000000100707        0.000000079178718        0.000000001156442        0.000000000584891      -40.899267713984216        2.491047006940117        2.889071095070733      747.212745038486560        0.000511995721755    16446.816017344754000  5030009.410321877300000  1268337.058860997700000      511.995721754911530      548.265957408944810    88232.104142812037000    27769.407584075227000      120.464254576022740       78.993809209356343       84.621618917570089    -4137.229832442988500    19755.619045466046000     2434.036266318427800      275.164342735349460        6.803978647015931       43.237367866375344    23712.487185228241000     3580.005678979988700     9685.952223827625900        0.000000000640186        0.000000001306599                      0.0                      0.0                      0.0                      0.0                      0.0                      0.0                      0.0        0.000001800000000        0.000000600000000
      200.610581202651470                      0.0                      0.0        0.000001449340109        0.000012856559301        0.000056072033727        0.000003310158712        0.000036878656764        0.000003682753811        0.000020073729264        0.001104066355574        0.000000283881059        0.000002978667514        0.000000000000013        0.000011635858793        0.004955659921575        0.078127215924343        0.009777994796118        0.000014530990875        0.000200767062251        0.000003310158712        0.000000232596006        0.000000002773757        0.000000000008845        0.000000000000000        0.000011654658816        0.000037801112543        0.000000342112186        0.000000000000076        0.000018866075835        0.000003846487259        0.000000000006139        0.000000000294237        0.000000000959405        0.000000000195840        0.000000000009501        0.000000000037932        0.000000000001932        0.000000000000000        0.000000000351532        0.000000000025019        0.000000000553618        0.000000000043292        0.000000000000410        0.000000000067774        0.000000000000406        0.000000000086942        0.000000000004225        0.000000000000000        0.000212108649312        0.000519170683590        0.000000001349334        0.000000336876805        0.000000000229110        0.000000002095215        0.000000003378406        0.000000002247583        0.000000013367858        0.000000000014085        0.000000082196524        0.000000001123387        0.000000000577976      -34.505854395541533        2.618612811673256        3.203312282504944      604.250720718389400        0.000859517376783     3080.484849459499900  5041902.121786735000000  1277875.293908581100000      859.517376782525840      917.037559649968900    89505.681894438487000    31489.346925110793000      112.799066447685920       79.217518873287432       84.570284533812440    -3532.618003501408600    19708.053339774313000     2418.570038602855200      274.824714153100620        6.226982604894516       66.886751482615679    24666.996301612158000     3505.267871524974000     8848.499809296814400        0.000000000194947        0.000000000954933        5.201618097894345                      0.0        1.602978578391087        0.582558416233080        0.136120469760223                      0.0        0.340249191491808        0.000001800000000        0.000000600000000
      200.611368206807640        0.000000000000283        0.000000000007350        0.000001216085543        0.000011179012217        0.000058328554991        0.000003379778659        0.000036726376860        0.000003742068229        0.000020359593737        0.001149925419443        0.000000275076211        0.000002940457668        0.000000000000002        0.000011784574047        0.005165220752550        0.082066075299536        0.010278388408114        0.000013096478754        0.000209835223453        0.000003379778659        0.000000228851644        0.000000000365035        0.000000000004336        0.000000000000000        0.000011567024673        0.000039308110982        0.000000333966942        0.000000000000004        0.000019460566792        0.000003879366678        0.000000000000810        0.000000000038775        0.000000000126580        0.000000000025821        0.000000000001254        0.000000000005000        0.000000000000255        0.000000000000000        0.000000000046373        0.000000000003300        0.000000000073040        0.000000000005710        0.000000000000054        0.000000000008933        0.000000000000054        0.000000000011469        0.000000000000560        0.000000000000000        0.000220277996046        0.000539218782824        0.000000000177854        0.000000320540165        0.000000000030194        0.000000000276179        0.000000001300142        0.000000000296229        0.000000002154988        0.000000000001858        0.000000084871911        0.000000001135973        0.000000000441272      -26.151846720873110        2.577243481720695        3.685708154968456      683.626167360487330        0.001614790188019     3519.775417012434000  5052450.080296539700000  1291812.438761784000000     1614.790188019027900     1706.301909696239800    91382.509896194199000    37131.863494230645000      100.033620834725160       76.986590420519704       81.523222213985022    -2773.973310281272000    20365.274654270994000     2390.920801929364200      274.568994924389070        6.000000000000000      125.752775248319720    26222.155498712986000     3309.060834862017100     7734.216779929634900        0.000000000080031        0.000000000424232        5.045076537977498                      0.0        1.295920024276632        0.443396332654051                      0.0                      0.0        0.316381582854091        0.000001800000000        0.000000600000000
      200.612155210963810        0.000000000000202        0.000000000011459        0.000001028429477        0.000009431272263        0.000063084877752        0.000003586685718        0.000037557451870        0.000003963391164        0.000021449228580        0.001242323808670        0.000000283511417        0.000003043358778        0.000000000000000        0.000012456965030        0.005585980308345        0.089973254226949        0.011282230949687        0.000012715378136        0.000228877870686        0.000003586685718        0.000000240583647        0.000000000019708        0.000000000002596        0.000000000000000        0.000012006468951        0.000042551433816        0.000000344953813        0.000000000000000        0.000020919275580        0.000004090869298        0.000000000000042        0.000000000002065        0.000000000006736        0.000000000001377        0.000000000000066        0.000000000000260        0.000000000000013        0.000000000000000        0.000000000002428        0.000000000000171        0.000000000003832        0.000000000000298        0.000000000000003        0.000000000000465        0.000000000000003        0.000000000000600        0.000000000000029        0.000000000000000        0.000237569611054        0.000581518190677        0.000000000009491        0.000000331272161        0.000000000001617        0.000000000014756        0.000000000855805        0.000000000015859        0.000000000424161        0.000000000000097        0.000000069103548        0.000000001079986        0.000000000386753      -15.222301510291093        2.458855443500106        4.259095956088190      502.779160350406470        0.002814244206886     3710.406302684746200  5062875.351782733600000  1306266.379871225700000     2814.244206886203300     2947.293533192078900    93155.730584729128000    45669.258422855368000       77.642403251403394       66.941714210889330       70.198647846132786    -1701.047380023593200    20651.842973533618000     2379.852837702486300      274.353584385914640        6.066450245536850      263.801857091397550    26105.233433994941000     2771.962238272285000     6266.222333527891400        0.000000000017731       -0.000000000475030        5.470908751447657                      0.0        1.371501557911273        0.458583798195589                      0.0                      0.0        0.306512022525846        0.000001800000000        0.000000600000000
      200.612942215119940        0.000000000000218        0.000000000013404        0.000000546693252        0.000004924838837        0.000044888748748        0.000002487950621        0.000024892893375        0.000002787342700        0.000014719972179        0.000879505568823        0.000000201103384        0.000002065931117        0.000000000000000        0.000009244642600        0.003957125948243        0.065600428159576        0.008248242827867        0.000008611711989        0.000166048421429        0.000002487950621        0.000000180676330        0.000000000000104        0.000000000001186        0.000000000000000        0.000008164312738        0.000030392969723        0.000000249613550        0.000000000000000        0.000015078614391        0.000002899714069        0.000000000000000        0.000000000000010        0.000000000000034        0.000000000000007        0.000000000000000        0.000000000000001        0.000000000000000        0.000000000000000        0.000000000000012        0.000000000000001        0.000000000000018        0.000000000000001        0.000000000000000        0.000000000000002        0.000000000000000        0.000000000000003        0.000000000000000        0.000000000000000        0.000168137600474        0.000411721706195        0.000000000000048        0.000000251930812        0.000000000000008        0.000000000000075        0.000000000472976        0.000000000000082        0.000000000167303        0.000000000000000        0.000000059611257        0.000000001162122        0.000000000470818       -6.963233223456914        3.148724866651717        4.534308594219244      292.248909754609310        0.004928773767073     3895.016552243164400  5072876.648485171600000  1320239.803316530800000     4928.773767073213100     5174.348363799646900    93312.223230111893000    55038.975706603589000       77.068673208935181       72.200554515203237       75.768120174459455     -814.548245083156760    19227.341726821873000     2386.504453378637700      274.048927615996260        6.085405163568397      406.802035739912980    24890.504732843619000     1917.044570460369200     4876.802384923367800        0.000000000010000       -0.000000000567798        4.706072844191641                      0.0        1.214077294506303        0.572344874878026                      0.0                      0.0        0.338451786480713        0.000001800000000        0.000000600000000
      200.613729219276110        0.000000000000166        0.000000000012824        0.000000408504135        0.000003629444736        0.000043042583250        0.000002314833378        0.000022265399086        0.000002676773472        0.000013457503481        0.000835707379491        0.000000200790409        0.000001888626041        0.000000000000000        0.000010658745144        0.003762211038082        0.065037663995460        0.008210770687249        0.000008397885038        0.000163842619286        0.000002314833378        0.000000196413989        0.000000000000001        0.000000000000885        0.000000000000000        0.000007473457770        0.000029342186851        0.000000258460421        0.000000000000000        0.000014954710366        0.000002846254550        0.000000000000000        0.000000000000000        0.000000000000000        0.000000000000000        0.000000000000000        0.000000000000000        0.000000000000000        0.000000000000000        0.000000000000000        0.000000000000000        0.000000000000000        0.000000000000000        0.000000000000000        0.000000000000000        0.000000000000000        0.000000000000000        0.000000000000000        0.000000000000000        0.000160081386968        0.000392024816153        0.000000000000000        0.000000284903014        0.000000000000000        0.000000000000000        0.000000000389102        0.000000000000000        0.000000000138255        0.000000000000000        0.000000058090118        0.000000001867820        0.000000000666445        1.819628521248792        4.122518808368713        4.810708618598508      879.317693197509240        0.008790997679667    22020.140480511574000  5082574.635734612100000  1328379.814248427700000     8790.997679667467300     9245.301295510682400    89301.535663636489000    65499.557468758590000       82.354902579987197       81.119563655976322       85.310033837505941      104.530490345594440    17418.220853371920000     2375.839937944214900      273.315989103606340        6.007787496029121      649.087470379272870    25074.316166235469000     2046.782426526088600     3542.508546905770300        0.000000000010891       -0.000000000031754        4.824106337382611                      0.0        1.686912378696680        0.726183649892439                      0.0                      0.0        0.368115118277718        0.000001800000000        0.000000600000000
      200.614516223432250        0.000000000000127        0.000000000014072        0.000000308240580        0.000002708047186        0.000040578647449        0.000002112651826        0.000019663015960        0.000002518116167        0.000012064982608        0.000779324260645        0.000000194390656        0.000001696084470        0.000000000000000        0.000011771896072        0.003515076210571        0.063535341642014        0.008056200160024        0.000008015159674        0.000159152027192        0.000002112651826        0.000000203495926        0.000000000000000        0.000000000000692        0.000000000000000        0.000006719327076        0.000027879918949        0.000000257847668        0.000000000000000        0.000014482548603        0.000002730710830        0.000000000000000        0.000000000000000        0.000000000000000        0.000000000000000        0.000000000000000        0.000000000000000        0.000000000000000        0.000000000000000        0.000000000000000        0.000000000000000        0.000000000000000        0.000000000000000        0.000000000000000        0.000000000000000        0.000000000000000        0.000000000000000        0.000000000000000        0.000000000000000        0.000149749332718        0.000366664768910        0.000000000000000        0.000000305127444        0.000000000000000        0.000000000000000        0.000000000323968        0.000000000000000        0.000000000118588        0.000000000000000        0.000000062555501        0.000000002863446        0.000000000672820       10.498495654285056        3.915557565736124        5.034563780447042      738.029274871216670        0.009822888804997    22368.104878328471000  5085819.325649366700000  1319420.597593369900000     9822.888804997497600    10306.540913499435000    90265.626081107490000    76046.341403084807000       60.086293594555322       59.680762433883011       62.627098523881379      973.559847672377370    14663.986994838751000     2380.457368039982600      272.359118088988280        5.450373799814254      906.496139846534790    14919.713053633322000      915.177688512283570     2355.653999494375100        0.000000000012703       -0.000000000169166        5.053266489376344                      0.0        1.539231989859116        0.623597630921484                      0.0                      0.0        0.337675565221996        0.000001800000000        0.000000600000000
      200.615314091899360        0.000000000000170        0.000000000014906        0.000000269236656        0.000002359926909        0.000037761473165        0.000001944767032        0.000017970655493        0.000002336534278        0.000011046794273        0.000722781866815        0.000000181271749        0.000001552279110        0.000000000000000        0.000011332039188        0.003262874768014        0.059787332092676        0.007590505569928        0.000007428627778        0.000149406916030        0.000001944767032        0.000000193090832        0.000000000000000        0.000000000000598        0.000000000000000        0.000006150829055        0.000026010727327        0.000000242215705        0.000000000000000        0.000013557268861        0.000002545478132        0.000000000000000        0.000000000000000        0.000000000000000        0.000000000000000        0.000000000000000        0.000000000000000        0.000000000000000        0.000000000000000        0.000000000000000        0.000000000000000        0.000000000000000        0.000000000000000        0.000000000000000        0.000000000000000        0.000000000000000        0.000000000000000        0.000000000000000        0.000000000000000        0.000139018055982        0.000340386743717        0.000000000000000        0.000000291578908        0.000000000000000        0.000000000000000        0.000000000287389        0.000000000000000        0.000000000105131        0.000000000000000        0.000000063304227        0.000000003167870        0.000000000556882       11.632537080038405        4.066729421017825        4.874391794784936      162.272009580262190        0.008638919874228     9254.117607490892600  5082210.580498657200000  1321596.261886625300000     8638.919874228300600     9079.608275388145600    92047.524896186296000    78119.273469309279000       49.698524593900856       49.282343527063560       51.797316630993286     1135.683829456138900    11258.032073600494000     2369.701733103210200      273.012412280652090        5.850799580928026     1025.136870169659000    12132.671643288595000      458.879316778007650     2138.969232489589100        0.000000000014176       -0.000000000406400        5.597843210821903                      0.0        1.532747388532443        0.656757585238168                      0.0                      0.0        0.379945039982879        0.000001800000000        0.000000600000000
      200.616104012345690        0.000000000000279        0.000000000018333        0.000000190207267        0.000001662603745        0.000029858878438        0.000001499500994        0.000013685613186        0.000001828792296        0.000008426482021        0.000566530291142        0.000000142754657        0.000001182157334        0.000000000000000        0.000009458203565        0.002564204926996        0.048527697572424        0.006178963791106        0.000005820440240        0.000120740245454        0.000001499500994        0.000000157249134        0.000000000000000        0.000000000000417        0.000000000000000        0.000004688108358        0.000020695460718        0.000000193424807        0.000000000000000        0.000010807057314        0.000002008274514        0.000000000000000        0.000000000000000        0.000000000000000        0.000000000000000        0.000000000000000        0.000000000000000        0.000000000000000        0.000000000000000        0.000000000000000        0.000000000000000        0.000000000000000        0.000000000000000        0.000000000000000        0.000000000000000        0.000000000000000        0.000000000000000        0.000000000000000        0.000000000000000        0.000109267429186        0.000267528506674        0.000000000000000        0.000000241068093        0.000000000000000        0.000000000000000        0.000000000208283        0.000000000000000        0.000000000075910        0.000000000000000        0.000000073052680        0.000000003118205        0.000000000510367       13.494419134777633        4.667521002447900        4.987064958373834     -320.353130873808250        0.011311138691111     5671.298951890875300  5085420.416475959100000  1330958.434800896600000    11311.138691110640000    11899.825590334627000    93554.510389716830000    81490.788866958261000       59.964497751480721       59.276437767608464       62.370691606178120     1327.844844588985300    11587.635503018399000     2378.537507839270800      272.396878975173760        5.731849861129197     1087.390920007221700    14330.605177702482000      608.622090828556680     1803.408561366922200        0.000000000023403        0.000000000933558                      0.0                      0.0                      0.0                      0.0                      0.0                      0.0                      0.0        0.000001800000000        0.000000600000000
      200.616903572118620        0.000000000000447        0.000000000017712        0.000000122621607        0.000001067747024        0.000022075378339        0.000001073838920        0.000009666405192        0.000001332622110        0.000005958180975        0.000414250561274        0.000000104759077        0.000000834208727        0.000000000000000        0.000007382789190        0.001881542787790        0.037011725176261        0.004729648199843        0.000004247116346        0.000091643997771        0.000001073838920        0.000000119723620        0.000000000000000        0.000000000000265        0.000000000000000        0.000003311104509        0.000015408049781        0.000000144092861        0.000000000000000        0.000008049431158        0.000001476687726        0.000000000000000        0.000000000000000        0.000000000000000        0.000000000000000        0.000000000000000        0.000000000000000        0.000000000000000        0.000000000000000        0.000000000000000        0.000000000000000        0.000000000000000        0.000000000000000        0.000000000000000        0.000000000000000        0.000000000000000        0.000000000000000        0.000000000000000        0.000000000000000        0.000080171839340        0.000196299174976        0.000000000000000        0.000000186377112        0.000000000000000        0.000000000000000        0.000000000138274        0.000000000000000        0.000000000050268        0.000000000000000        0.000000078970313        0.000000002452184        0.000000000333225       17.405905328193882        4.673787644117367        5.192242252382134     -154.427432852763590        0.013607855162197     5544.022087514761600  5089738.822619417700000  1340235.979754691700000    13607.855162196876000    14301.131893843791000    95202.374371037789000    86328.611588026746000       59.748623160456816       59.111931922042686       62.123613406943491     1711.493854084181500    11766.813996740759000     2416.748197907835200      272.575246031652570        5.443360720744313     1252.370203521614700    10214.427066391780000      435.979850837866480     1328.707670247464200        0.000000000033330        0.000000002163985                      0.0                      0.0                      0.0                      0.0                      0.0                      0.0                      0.0        0.000001800000000        0.000000600000000
      200.617692698716550        0.000000000000359        0.000000000015784        0.000000123890891        0.000001080396350        0.000022488365941        0.000001090938603        0.000009829438832        0.000001353005939        0.000006045556795        0.000421863526185        0.000000106051087        0.000000844960857        0.000000000000000        0.000007498189823        0.001916348770009        0.037763405342739        0.004827009821399        0.000004280531451        0.000093469848468        0.000001090938603        0.000000121400935        0.000000000000000        0.000000000000259        0.000000000000000        0.000003354320611        0.000015702122357        0.000000145867545        0.000000000000000        0.000008188913049        0.000001499235156        0.000000000000000        0.000000000000000        0.000000000000000        0.000000000000000        0.000000000000000        0.000000000000000        0.000000000000000        0.000000000000000        0.000000000000000        0.000000000000000        0.000000000000000        0.000000000000000        0.000000000000000        0.000000000000000        0.000000000000000        0.000000000000000        0.000000000000000        0.000000000000000        0.000081615935129        0.000199820511361        0.000000000000000        0.000000188705682        0.000000000000000        0.000000000000000        0.000000000137209        0.000000000000000        0.000000000049156        0.000000000000000        0.000000080912945        0.000000001943315        0.000000000213806       17.221597204113088        4.793620949458413        5.186238694984573       28.189950982432123        0.013913856427188     5254.416747732607300  5093805.791421189000000  1349002.259877627000000    13913.856427187618000    14628.150436591575000    96856.563989436239000    86358.476394580299000       61.845227316150449       61.146995458077463       64.286012566857394     1695.369533516909800    11839.305684317904000     2443.677903463298700      273.437205730175830        5.751010026580570     1308.962005348223300     5798.708570502743900      482.876567725091550     1325.748544678596300        0.000000000047989        0.000000003083286                      0.0                      0.0                      0.0                      0.0                      0.0                      0.0                      0.0        0.000001800000000        0.000000600000000
      200.618472698801750                      0.0                      0.0        0.000000172416120        0.000001505384448        0.000030882183474        0.000001501178352        0.000013570612454        0.000001857121236        0.000008328843385        0.000580093539057        0.000000145005204        0.000001161825079        0.000000000000000        0.000010191039174        0.002634341132215        0.051725159429141        0.006609539434389        0.000005826132792        0.000128097178653        0.000001501178352        0.000000165349716        0.000000000000000        0.000000000000347        0.000000000000000        0.000004614493685        0.000021552534897        0.000000199005481        0.000000000000000        0.000011222521460        0.000002052167223        0.000000000000000        0.000000000000000        0.000000000000000        0.000000000000000        0.000000000000000        0.000000000000000        0.000000000000000        0.000000000000000        0.000000000000000        0.000000000000000        0.000000000000000        0.000000000000000        0.000000000000000        0.000000000000000        0.000000000000000        0.000000000000000        0.000000000000000        0.000000000000000        0.000112151344516        0.000274671468771        0.000000000000000        0.000000255958825        0.000000000000000        0.000000000000000        0.000000000186149        0.000000000000000        0.000000000065680        0.000000000000000        0.000000083526103        0.000000001110154       -0.000000000010570       16.717717359339588        4.786179920416851        5.197110388219373      163.603136411754040        0.014042708933398     6213.236639437975100  5098637.695771256500000  1357328.339508725800000    14042.708933397926000    14762.528877435716000    98272.122528740656000    85823.261740197049000       64.013129914484537       63.294838626563667       66.539871018236212     1632.462652354205600    12469.743367533914000     2460.103892059493800      273.569536968241440        5.876598637307460     1303.230026716726100     7955.876503849667600      359.774960872450660     1376.839461679880500        0.000000000066276        0.000000003264224                      0.0                      0.0                      0.0                      0.0                      0.0                      0.0                      0.0        0.000001800000000        0.000000600000000
      200.619257512932420                      0.0                      0.0        0.000000193050807        0.000001690867662        0.000032409572652        0.000001599387446        0.000014571862525        0.000001958595589        0.000008923600354        0.000612374208262        0.000000151908234        0.000001243763057        0.000000000000000        0.000010364289724        0.002776040742464        0.053444652181162        0.006815622459775        0.000006084198000        0.000132628341171        0.000001599387446        0.000000170086812        0.000000000000000        0.000000000000374        0.000000000000000        0.000004938234787        0.000022526285229        0.000000206732702        0.000000000000000        0.000011709571757        0.000002153039776        0.000000000000000        0.000000000000000        0.000000000000000        0.000000000000000        0.000000000000000        0.000000000000000        0.000000000000000        0.000000000000000        0.000000000000000        0.000000000000000        0.000000000000000        0.000000000000000        0.000000000000000        0.000000000000000        0.000000000000000        0.000000000000000        0.000000000000000        0.000000000000000        0.000118215733163        0.000289394658935        0.000000000000000        0.000000260671881        0.000000000000000        0.000000000000000        0.000000000200679        0.000000000000000        0.000000000069706        0.000000000000000        0.000000083814586        0.000000000588582        0.000000000003704       15.495535572541041        4.802683134570150        5.172090198556267      423.483034995068240        0.013767111951345    22335.680942446663000  5103957.066238782400000  1357877.097042057000000    13767.111951344508000    14475.272920473910000    99151.796092176228000    84507.744706095502000       66.861264250188171       66.100245050954783       69.501217476885870     1499.936976049817800    13054.698837810525000     2475.961532414388800      273.715034145727090        6.000000000000000     1250.981192316224700    12467.785525654017000      615.221893675249820     1502.907039387815500        0.000000000052105        0.000000002809346                      0.0                      0.0                      0.0                      0.0                      0.0                      0.0                      0.0        0.000001800000000        0.000000600000000
      200.620055233635950                      0.0                      0.0        0.000000159545152        0.000001399190131        0.000026027528035        0.000001293179680        0.000011822604840        0.000001575825629        0.000007231587201        0.000493065744499        0.000000121727461        0.000001007059857        0.000000000000000        0.000008186735530        0.002233385145265        0.042587023893827        0.005425605529800        0.000004863493993        0.000105754134091        0.000001293179680        0.000000135129625        0.000000000000000        0.000000000000302        0.000000000000000        0.000003998726225        0.000018052946451        0.000000165015636        0.000000000000000        0.000009375299418        0.000001727199680        0.000000000000000        0.000000000000000        0.000000000000000        0.000000000000000        0.000000000000000        0.000000000000000        0.000000000000000        0.000000000000000        0.000000000000000        0.000000000000000        0.000000000000000        0.000000000000000        0.000000000000000        0.000000000000000        0.000000000000000        0.000000000000000        0.000000000000000        0.000000000000000        0.000095115577828        0.000232779945721        0.000000000000000        0.000000205899224        0.000000000000000        0.000000000000000        0.000000000162499        0.000000000000000        0.000000000055861        0.000000000000000        0.000000080005684        0.000000000368641        0.000000000025227       15.152337825213147        4.684772008420598        5.200471259317590      567.987279259241290        0.013765623709791    21032.218338335624000  5101571.659221100600000  1349955.078279022800000    13765.623709790651000    14466.982148964158000    99590.766633099818000    83992.645423455077000       67.883686122171554       67.157022842447148       70.578840561814829     1449.309930417274700    13764.143282359535000     2497.360534598697100      273.754098360655750        6.000000000000000     1230.769508004717900    10397.788078482097000     1045.537570338785600     1552.429362838635800        0.000000000053279        0.000000002715073        7.856696966340606                      0.0        2.591594672245812        1.299501447126897                      0.0        0.276489162135101        0.543976363881042        0.000001800000000        0.000000600000000
      200.620850189393930        0.000000000000275        0.000000000015935        0.000000135791223        0.000001190998036        0.000022255485866        0.000001103107952        0.000010097146109        0.000001344459959        0.000006167522875        0.000421404719651        0.000000103701769        0.000000858265300        0.000000000000000        0.000006986078806        0.001909202936652        0.036454484669375        0.004644657071664        0.000004128595358        0.000090475818182        0.000001103107952        0.000000115233188        0.000000000000000        0.000000000000251        0.000000000000000        0.000003406530048        0.000015441232367        0.000000140546094        0.000000000000000        0.000008014134079        0.000001473107615        0.000000000000000        0.000000000000000        0.000000000000000        0.000000000000000        0.000000000000000        0.000000000000000        0.000000000000000        0.000000000000000        0.000000000000000        0.000000000000000        0.000000000000000        0.000000000000000        0.000000000000000        0.000000000000000        0.000000000000000        0.000000000000000        0.000000000000000        0.000000000000000        0.000081250594464        0.000198931635191        0.000000000000000        0.000000175355356        0.000000000000000        0.000000000000000        0.000000000136511        0.000000000000000        0.000000000046521        0.000000000000000        0.000000077894429        0.000000000261797        0.000000000012885       15.539179384820466        4.980974594147984        5.099095726130217      871.602845277826420        0.013454814864038    11353.367324962926000  5095144.360005831300000  1349232.219774256500000    13454.814864037695000    14158.348426862953000    99800.745021134047000    83994.766356551409000       64.807869946966875       64.003714553743649       67.350743529336341     1511.717988810790800    11782.278581992487000     2530.773636608118500      273.802840389924770        6.000000000000000     1261.483814224103500     9072.095973706755100      899.245582076079360     1552.230004917160400        0.000000000028620        0.000000002731277        7.927897429919339                      0.0        2.504778682289343        1.263155126545781        0.156968020872576        0.313559131692671        0.545155625586025        0.000001800000000        0.000000600000000
      200.621651868238900        0.000000000000096        0.000000000014585        0.000000173970153        0.000001527736716        0.000028718437917        0.000001419797670        0.000013005311390        0.000001729821240        0.000007930356109        0.000543653839386        0.000000133102814        0.000001101698766        0.000000000000000        0.000008991520525        0.002463542729955        0.047120602117737        0.006005766823451        0.000005271868413        0.000116935989174        0.000001419797670        0.000000148087599        0.000000000000000        0.000000000000311        0.000000000000000        0.000004374053848        0.000019929398529        0.000000180287735        0.000000000000000        0.000010327442417        0.000001894269592        0.000000000000000        0.000000000000000        0.000000000000000        0.000000000000000        0.000000000000000        0.000000000000000        0.000000000000000        0.000000000000000        0.000000000000000        0.000000000000000        0.000000000000000        0.000000000000000        0.000000000000000        0.000000000000000        0.000000000000000        0.000000000000000        0.000000000000000        0.000000000000000        0.000104812230128        0.000256656326249        0.000000000000000        0.000000224987559        0.000000000000000        0.000000000000000        0.000000000171507        0.000000000000000        0.000000000057592        0.000000000000000        0.000000081850383        0.000000000170654        0.000000000021281       15.531878100240981        5.268228700231568        5.016646448085704     -165.102338649886580        0.013190974768288     3444.266675580281600  5098241.597996411800000  1356033.927062203200000    13190.974768287726000    13895.527176942558000    99864.708234675505000    84258.713489196612000       63.865981460763223       62.980364115537732       66.345392165407759     1532.890639825853700    10234.729718458961000     2564.578492177684900      274.092757251448690        6.000000000000000     1256.924266821304200    16910.744383816422000      355.061109742604690     1526.684127979053100        0.000000000024909        0.000000002649313                      0.0                      0.0                      0.0                      0.0                      0.0                      0.0                      0.0        0.000001800000000        0.000000600000000
      200.622446787756020        0.000000000000079        0.000000000014813        0.000000269689504        0.000002370967400        0.000044812540286        0.000002210893870        0.000020265477480        0.000002691798751        0.000012337351445        0.000847960187566        0.000000206589352        0.000001711162973        0.000000000000000        0.000013990469596        0.003844386100972        0.073644464820349        0.009385337279949        0.000008151026163        0.000182612033589        0.000002210893870        0.000000230160451        0.000000000000000        0.000000000000467        0.000000000000000        0.000006793610041        0.000031106154463        0.000000279905245        0.000000000000000        0.000016099907911        0.000002946017818        0.000000000000000        0.000000000000000        0.000000000000000        0.000000000000000        0.000000000000000        0.000000000000000        0.000000000000000        0.000000000000000        0.000000000000000        0.000000000000000        0.000000000000000        0.000000000000000        0.000000000000000        0.000000000000000        0.000000000000000        0.000000000000000        0.000000000000000        0.000000000000000        0.000163491715197        0.000400230977129        0.000000000000000        0.000000349265153        0.000000000000000        0.000000000000000        0.000000000261674        0.000000000000000        0.000000000086739        0.000000000000000        0.000000084680817        0.000000000104384        0.000000000025027       15.408600564065880        5.288410639593556        5.010906043957753      170.760460439947850        0.013146666336068    11773.729523250859000  5103281.619293115100000  1360088.034062946000000    13146.666336068167000    13849.902635673479000    99864.363693879364000    84334.313135458025000       64.227042146038045       63.330803644047869       66.718795755258967     1526.776656141569200    10229.752505457969000     2596.472527443959300      274.376885286622380        6.000000000000000     1245.910753769251400    15395.985670462534000      353.655325674646520     1519.463093805763300        0.000000000025241        0.000000002532308                      0.0                      0.0                      0.0                      0.0                      0.0                      0.0                      0.0        0.000001800000000        0.000000600000000
      200.623226621688130        0.000000000000152        0.000000000016892        0.000000307827890        0.000002698885065        0.000056289627181        0.000002711914116        0.000024622406395        0.000003343505064        0.000014985216531        0.001055862251112        0.000000257824143        0.000002076739970        0.000000000000000        0.000018267734982        0.004801211750977        0.094829715226097        0.012116089311156        0.000010147125001        0.000234291461246        0.000002711914116        0.000000295089354        0.000000000000000        0.000000000000528        0.000000000000000        0.000008250351921        0.000039301118508        0.000000353224501        0.000000000000000        0.000020327739516        0.000003683517837        0.000000000000000        0.000000000000000        0.000000000000000        0.000000000000000        0.000000000000000        0.000000000000000        0.000000000000000        0.000000000000000        0.000000000000000        0.000000000000000        0.000000000000000        0.000000000000000        0.000000000000000        0.000000000000000        0.000000000000000        0.000000000000000        0.000000000000000        0.000000000000000        0.000204225878887        0.000499932108602        0.000000000000000        0.000000453054417        0.000000000000000        0.000000000000000        0.000000000304759        0.000000000000000        0.000000000100734        0.000000000000000        0.000000083697345        0.000000000052808        0.000000000027678       16.311839446484377        5.048605038640480        5.130929326207308      -77.392330465128282        0.013837261921984    30850.232491048555000  5108326.171457582200000  1356370.547657420900000    13837.261921984147000    14558.766753325484000    99860.622255469178000    86120.837295876045000       65.091779271760970       64.274515435513237       67.634565871020243     1608.404724823910300    11633.648245638484000     2622.586468942256900      274.292749077364310        5.777574757733349     1241.909405616504000    13648.257096812944000      591.468217048193310     1350.521760345432500        0.000000000051229        0.000000002328490                      0.0                      0.0                      0.0                      0.0                      0.0                      0.0                      0.0        0.000001800000000        0.000000600000000
      200.624014191006270        0.000000000000215        0.000000000021735        0.000000325889420        0.000002849392190        0.000068063045493        0.000003162480804        0.000028375102993        0.000003960297445        0.000017234039741        0.001260434456861        0.000000306575225        0.000002381714395        0.000000000000000        0.000022992846088        0.005754669618591        0.118954012500866        0.015286572484109        0.000012018595017        0.000292385936537        0.000003162480804        0.000000363068035        0.000000000000000        0.000000000000551        0.000000000000000        0.000009471520890        0.000047962025053        0.000000425872927        0.000000000000000        0.000024655037150        0.000004397979122        0.000000000000000        0.000000000000000        0.000000000000000        0.000000000000000        0.000000000000000        0.000000000000000        0.000000000000000        0.000000000000000        0.000000000000000        0.000000000000000        0.000000000000000        0.000000000000000        0.000000000000000        0.000000000000000        0.000000000000000        0.000000000000000        0.000000000000000        0.000000000000000        0.000244755131547        0.000599227393709        0.000000000000000        0.000000565580689        0.000000000000000        0.000000000000000        0.000000000330339        0.000000000000000        0.000000000108673        0.000000000000000        0.000000079727485        0.000000000022816        0.000000000035089       19.679067183307644        4.457350348469170        5.340686673613107     -218.796682673015370        0.014570667746753    17255.783250780521000  5114056.484486364800000  1351324.232498975200000    14570.667746752655000    15290.338015062680000    99873.780954084330000    90143.446778154321000       58.029325083497298       57.504898442969690       60.351506279843974     1926.211471658320100    12383.776129807424000     2666.338259205098900      274.252748806456740        5.198871172356382     1320.715906541133800    16116.651312964164000      632.696639598559390      974.719224375879320        0.000000000086714        0.000000002427089                      0.0                      0.0                      0.0                      0.0                      0.0                      0.0                      0.0        0.000001800000000        0.000000600000000
      200.624795849867700        0.000000000000289        0.000000000022071        0.000000353571242        0.000003090697316        0.000076177382538        0.000003505771275        0.000031419346181        0.000004403091646        0.000019045560679        0.001406378588687        0.000000340248458        0.000002626902065        0.000000000000000        0.000025841020731        0.006430062379463        0.134247577838539        0.017265468882980        0.000013270365032        0.000329581668519        0.000003505771275        0.000000405938110        0.000000000000000        0.000000000000577        0.000000000000000        0.000010449627089        0.000053787297769        0.000000473877447        0.000000000000000        0.000027578191461        0.000004894390049        0.000000000000000        0.000000000000000        0.000000000000000        0.000000000000000        0.000000000000000        0.000000000000000        0.000000000000000        0.000000000000000        0.000000000000000        0.000000000000000        0.000000000000000        0.000000000000000        0.000000000000000        0.000000000000000        0.000000000000000        0.000000000000000        0.000000000000000        0.000000000000000        0.000273425402922        0.000669395864774        0.000000000000000        0.000000633092346        0.000000000000000        0.000000000000000        0.000000000354078        0.000000000000000        0.000000000114843        0.000000000000000        0.000000078486153        0.000000000313385        0.000000000110520       20.917950835046472        4.280514913327742        5.388616427956738      124.862733134879040        0.014551279153842     3531.858491937592100  5119913.743707767700000  1355009.051171924700000    14551.279153841762000    15257.652008297342000    99863.779292050007000    91470.625536157604000       54.200781364421026       53.782195193269295       56.392541210083238     2050.570852690725100    12109.830235336551000     2707.977351325786000      274.307198141819010        5.000000000000000     1353.562265137383700    11951.359448959298000      563.283360844539290      852.754455014228370        0.000000000091031        0.000000002813166                      0.0                      0.0                      0.0                      0.0                      0.0                      0.0                      0.0        0.000001800000000        0.000000600000000
      200.625580570489830        0.000000000000376        0.000000000020811        0.000000513273201        0.000004513192083        0.000095879263291        0.000004565345684        0.000041563546046        0.000005625266968        0.000025133738762        0.001793368327961        0.000000430100667        0.000003463885445        0.000000000000000        0.000030807783201        0.008164274518589        0.163128286706841        0.020881363837248        0.000016714149856        0.000402228910021        0.000004565345684        0.000000495170514        0.000000000000000        0.000000000000794        0.000000000000000        0.000013774126795        0.000067089205121        0.000000589329559        0.000000000000000        0.000034444086310        0.000006186389541        0.000000000000000        0.000000000000000        0.000000000000000        0.000000000000000        0.000000000000000        0.000000000000000        0.000000000000000        0.000000000000000        0.000000000000000        0.000000000000000        0.000000000000000        0.000000000000000        0.000000000000000        0.000000000000000        0.000000000000000        0.000000000000000        0.000000000000000        0.000000000000000        0.000346969276380        0.000849513918383        0.000000000000000        0.000000757783244        0.000000000000000        0.000000000000000        0.000000000479883        0.000000000000000        0.000000000152229        0.000000000000000        0.000000079981551                      0.0                      0.0       16.869126752269985        4.418403661155622        5.242443708602790       99.486515071501060        0.013415444033431     3491.630232941955500  5125741.900798423200000  1362459.503428653300000    13415.444033431082000    14083.357626724688000    99821.640384565442000    85850.411041096930000       60.306831670279266       59.756283430559087       62.738989258856193     1617.549262686228800    13053.783651635073000     2728.282901752015700      274.667787882202160        5.419233470016553     1213.568638330271800     7831.479831112028500      436.561460239173470     1382.957033466217400        0.000000000081641        0.000000002093027                      0.0                      0.0                      0.0                      0.0                      0.0                      0.0                      0.0        0.000001800000000        0.000000600000000
      200.626365846372210        0.000000000000341        0.000000000018488        0.000000690435523        0.000006131191928        0.000102168997137        0.000005125254881        0.000048039063524        0.000006108757997        0.000028827029535        0.001949821632682        0.000000456934048        0.000003968307088        0.000000000000000        0.000029154509978        0.008822981451258        0.164284162874414        0.020878285154289        0.000017721038065        0.000408173158157        0.000005125254881        0.000000492265857        0.000000000000000        0.000000000001001        0.000000000000000        0.000015756395443        0.000070508948659        0.000000607751623        0.000000000000000        0.000036051835040        0.000006588918294        0.000000000000000        0.000000000000000        0.000000000000000        0.000000000000000        0.000000000000000        0.000000000000000        0.000000000000000        0.000000000000000        0.000000000000000        0.000000000000000        0.000000000000000        0.000000000000000        0.000000000000000        0.000000000000000        0.000000000000000        0.000000000000000        0.000000000000000        0.000000000000000        0.000374577258812        0.000917256621740        0.000000000000000        0.000000726934298        0.000000000000000        0.000000000000000        0.000000000582357        0.000000000000000        0.000000000179028        0.000000000000000        0.000000065539170                      0.0                      0.0        9.288620409404498        4.326938125186281        4.896452429597073      229.896549587112330        0.009646913992936    25504.415903189896000  5132716.886176843200000  1364964.426140412900000     9646.913992936190000    10144.487775369491000    99861.087626721433000    75673.298741355931000       62.324519882881432       61.703246070281971       64.900811577414984      857.135554308497830    13599.057611593740000     2731.266754772931100      275.043578379866970        5.883147448996711      918.647011981497830    16547.967284159920000      360.916215342785960     2404.883556308006500        0.000000000027763        0.000000000982584                      0.0                      0.0                      0.0                      0.0                      0.0                      0.0                      0.0        0.000001800000000        0.000000600000000
      200.627158102290280        0.000000000000349        0.000000000017719        0.000000674448479        0.000006062994874        0.000080819924639        0.000004195069163        0.000040615124696        0.000004846611224        0.000024010105411        0.001562169270124        0.000000351812969        0.000003294556312        0.000000000000000        0.000019780274410        0.007049796723407        0.124888996633693        0.015794394198863        0.000013704439748        0.000311998206074        0.000004195069163        0.000000354933412        0.000000000000000        0.000000000000911        0.000000000000000        0.000013074622032        0.000055246746969        0.000000454141374        0.000000000000000        0.000027790695103        0.000005126016881        0.000000000000000        0.000000000000000        0.000000000000000        0.000000000000000        0.000000000000000        0.000000000000000        0.000000000000000        0.000000000000000        0.000000000000000        0.000000000000000        0.000000000000000        0.000000000000000        0.000000000000000        0.000000000000000        0.000000000000000        0.000000000000000        0.000000000000000        0.000000000000000        0.000298805378969        0.000731548482961        0.000000000000000        0.000000505613207        0.000000000000000        0.000000000000000        0.000000000509507        0.000000000000000        0.000000000150534        0.000000000000000        0.000000059454543                      0.0                      0.0        2.255458272673661        4.824421571732526        4.560122390879688      507.713539863653070        0.008040491069653    30659.868788475138000  5138835.499764621300000  1356949.469484795400000     8040.491069653087800     8486.163422413194000    99947.653196539264000    65935.817349040342000       74.307564530034085       73.240962459876400       77.304166847049814      157.255470070707470    13825.277592628381000     2728.494489201302300      275.553561176133030        5.996339724170679      657.486701091259990    21187.149336992068000      888.653269891567560     3484.626140805028200        0.000000000018561        0.000000000376782                      0.0                      0.0                      0.0                      0.0                      0.0                      0.0                      0.0        0.000001800000000        0.000000600000000
      200.627959707754630        0.000000000000177        0.000000000013787        0.000001070360656        0.000009750689499        0.000106562520996        0.000005663996322        0.000056658286583        0.000006372035743        0.000032893673576        0.002078011455261        0.000000447124916        0.000004495878964        0.000000000000000        0.000021919687248        0.009369528772541        0.160035064499339        0.020158781241670        0.000017518894450        0.000401044519284        0.000005663996322        0.000000423300348        0.000000000000002        0.000000000001360        0.000000000000000        0.000017830437886        0.000072397084957        0.000000560752116        0.000000000000000        0.000035666006282        0.000006618805765        0.000000000000000        0.000000000000000        0.000000000000000        0.000000000000000        0.000000000000000        0.000000000000000        0.000000000000000        0.000000000000000        0.000000000000000        0.000000000000000        0.000000000000000        0.000000000000000        0.000000000000000        0.000000000000000        0.000000000000000        0.000000000000000        0.000000000000000        0.000000000000000        0.000396304303280        0.000970523271637        0.000000000000001        0.000000582890293        0.000000000000000        0.000000000000001        0.000000000730503        0.000000000000001        0.000000000206984        0.000000000000000        0.000000055968961                      0.0                      0.0       -3.604532971647981        4.075960915714946        4.339417374815213      562.903520558982900        0.005281488627049    31063.993499731379000  5145064.892753964300000  1346822.967238308400000     5281.488627049171600     5574.841511018537900   100001.245481725350000    59116.451793871965000       69.862487402582929       66.621345236497859       70.326798071757395     -436.559392636446150    14864.236176431119000     2740.203666689062600      275.706916823434600        6.000000000000000      477.533803077116030    22649.272457000785000     1318.615274791700100     4321.018620514892100        0.000000000015622       -0.000000000111067                      0.0                      0.0                      0.0                      0.0                      0.0                      0.0                      0.0        0.000001800000000        0.000000600000000
      200.628753691402350        0.000000000000168        0.000000000010447        0.000001694237335        0.000015575390878        0.000149560153670        0.000008051888438        0.000082308429581        0.000008916968557        0.000047151578550        0.002929582769839        0.000000610088549        0.000006433089190        0.000000000000000        0.000028109579216        0.013214952171103        0.221438053611684        0.027836394880518        0.000024056961009        0.000555535111945        0.000008051888438        0.000000553223487        0.000000000000035        0.000000000002104        0.000000000000000        0.000025498583983        0.000101296135801        0.000000750512883        0.000000000000000        0.000049163536803        0.000009160241397        0.000000000000000        0.000000000000004        0.000000000000011        0.000000000000002        0.000000000000000        0.000000000000000        0.000000000000000        0.000000000000000        0.000000000000004        0.000000000000000        0.000000000000006        0.000000000000000        0.000000000000000        0.000000000000001        0.000000000000000        0.000000000000001        0.000000000000000        0.000000000000000        0.000558126032152        0.001366536398519        0.000000000000016        0.000000745773679        0.000000000000003        0.000000000000025        0.000000001088160        0.000000000000027        0.000000000305727        0.000000000000000        0.000000056838198                      0.0                      0.0       -8.685941315351261        4.696131592925964        4.135656361125765      562.840054295306910        0.005111411869928    32213.744066513231000  5152268.203866000300000  1337218.183372041900000     5111.411869927790600     5412.431771916039900   100028.638907557850000    53459.217667180965000       95.346799388071702       86.113112633847152       91.190365866351158     -951.162390568672210    15532.918667252003000     2745.570643802014300      275.701202030108560        6.000000000000000      358.366120490829190    22547.882228761857000     1323.089943022688200     5080.312962598754900        0.000000000020032       -0.000000000224829                      0.0                      0.0                      0.0                      0.0                      0.0                      0.0                      0.0        0.000001800000000        0.000000600000000
      200.629539736930700        0.000000000000149        0.000000000011086        0.000002039002602        0.000018908100065        0.000163787136682        0.000008888803843        0.000092219149719        0.000009752340459        0.000052231723117        0.003214932017991        0.000000656722478        0.000007140381801        0.000000000000000        0.000030422642847        0.014503565484478        0.240090521003264        0.030145042193633        0.000026128844990        0.000602855487656        0.000008888803843        0.000000578354879        0.000000000000331        0.000000000002545        0.000000000000000        0.000028294095712        0.000110724125131        0.000000797886030        0.000000000000000        0.000053233843512        0.000009958991126        0.000000000000001        0.000000000000034        0.000000000000110        0.000000000000023        0.000000000000001        0.000000000000004        0.000000000000000        0.000000000000000        0.000000000000039        0.000000000000003        0.000000000000061        0.000000000000005        0.000000000000000        0.000000000000007        0.000000000000000        0.000000000000010        0.000000000000000        0.000000000000000        0.000612130291566        0.001498710662877        0.000000000000156        0.000000770009440        0.000000000000027        0.000000000000243        0.000000001259899        0.000000000000263        0.000000000365305        0.000000000000002        0.000000055808640                      0.0                      0.0      -11.790951939024426        4.189116172953709        4.120214871035044      784.961479382157110        0.004450486523748    32997.410921793293000  5161547.387072734500000  1330311.306760590500000     4450.486523748263600     4708.699087530534600    99667.510483135848000    49931.114840587470000      101.485573972779560       89.281085443316456       94.455941519886920    -1271.430948463426400    17267.075419252080000     2754.002626946216000      275.482182410707540        6.000000000000000      298.876864214928620    23056.468049429841000     2116.692776786469500     5584.785945514268000        0.000000000026457                      0.0                      0.0                      0.0                      0.0                      0.0                      0.0                      0.0                      0.0        0.000001800000000        0.000000600000000
      200.630330071395520        0.000000000000343        0.000000000016302        0.000002157915611        0.000020153865004        0.000160378795435        0.000008751904056        0.000092071839861        0.000009588031238        0.000051504211385        0.003153743482514        0.000000645057814        0.000007058885019        0.000000000000000        0.000029962730015        0.014214439123666        0.233665382835679        0.029319201300038        0.000025883096566        0.000587407135137        0.000008751904056        0.000000563049980        0.000000000001870        0.000000000002722        0.000000000000000        0.000027965708416        0.000108254322770        0.000000781491616        0.000000000000000        0.000052085202660        0.000009779794859        0.000000000000004        0.000000000000195        0.000000000000638        0.000000000000130        0.000000000000006        0.000000000000024        0.000000000000001        0.000000000000000        0.000000000000229        0.000000000000016        0.000000000000361        0.000000000000028        0.000000000000000        0.000000000000044        0.000000000000000        0.000000000000056        0.000000000000003        0.000000000000000        0.000600066773351        0.001469382124852        0.000000000000899        0.000000748790998        0.000000000000153        0.000000000001397        0.000000001294692        0.000000000001502        0.000000000394379        0.000000000000009        0.000000054927044                      0.0                      0.0      -14.217299937164359        3.432479297493268        4.087780826707687      878.653865932473760        0.003512868312565    32772.615532472490000  5171872.160028741700000  1323127.175810018800000     3512.868312564973600     3709.953548254327000    98405.011620488396000    46540.360519271191000       92.122067872434585       79.453385152441328       83.933571896904326    -1520.819951206396800    18319.462777975601000     2756.730176155379900      275.303115019771270        6.000000000000000      265.517757511772060    23904.383533651639000     2357.117021937092000     6105.070725833525100        0.000000000034529                      0.0                      0.0                      0.0                      0.0                      0.0                      0.0                      0.0                      0.0        0.000001800000000        0.000000600000000
      200.631120363866780        0.000000000000534        0.000000000015070        0.000002584398276        0.000024439613978        0.000165844699800        0.000009146499488        0.000098795445789        0.000010035458813        0.000054020236996        0.003266703209731        0.000000683370163        0.000007455783799        0.000000000000000        0.000031394604198        0.014710395127388        0.239191959645184        0.029974207407627        0.000028120592620        0.000602995228292        0.000009146499488        0.000000592312585        0.000000000020846        0.000000000003591        0.000000000000000        0.000029505290071        0.000111765425786        0.000000828171373        0.000000000000000        0.000054127243706        0.000010257816369        0.000000000000046        0.000000000002218        0.000000000007256        0.000000000001479        0.000000000000072        0.000000000000286        0.000000000000015        0.000000000000000        0.000000000002658        0.000000000000189        0.000000000004186        0.000000000000327        0.000000000000003        0.000000000000512        0.000000000000003        0.000000000000657        0.000000000000032        0.000000000000000        0.000621757175958        0.001522712116442        0.000000000010186        0.000000793007645        0.000000000001729        0.000000000015807        0.000000001534807        0.000000000016953        0.000000000591743        0.000000000000106        0.000000068538630                      0.0                      0.0      -18.543254871997473        3.267869769711139        3.840401105216734      918.022388455946500        0.002525146282412    31697.744996658115000  5181377.347717059800000  1314657.754824777100000     2525.146282411683800     2673.957211508214200    97446.540681088503000    42444.202904254271000       90.079179909455519       74.401777019984308       78.807080018413004    -1945.755935135498700    17967.242426831173000     2742.462978156884700      275.272345690478010        6.000000000000000      203.339032883747000    24585.756771249096000     2528.809126164407200     6767.961820926626400        0.000000000054153                      0.0                      0.0                      0.0                      0.0                      0.0                      0.0                      0.0                      0.0        0.000001800000000        0.000000600000000
      200.631910656337940                      0.0                      0.0        0.000003141316466        0.000029904432139        0.000183504559084        0.000010189317834        0.000111803069666        0.000011194853794        0.000060327292455        0.003617536803156        0.000000769539697        0.000008374933387        0.000000000000000        0.000035044024273        0.016278996147812        0.263182191555168        0.032958902908699        0.000032333046138        0.000664685791983        0.000010189317834        0.000000663388969        0.000000000091591        0.000000000004843        0.000000000000000        0.000033118255597        0.000123599810676        0.000000932968077        0.000000000000000        0.000060083629867        0.000011458534658        0.000000000000209        0.000000000009833        0.000000000032182        0.000000000006551        0.000000000000321        0.000000000001288        0.000000000000066        0.000000000000000        0.000000000011907        0.000000000000852        0.000000000018730        0.000000000001469        0.000000000000014        0.000000000002301        0.000000000000014        0.000000000002945        0.000000000000145        0.000000000000000        0.000688734939480        0.001686123125910        0.000000000045098        0.000000893416377        0.000000000007636        0.000000000069940        0.000000001926512        0.000000000074901        0.000000001075455        0.000000000000479        0.000000073851555                      0.0                      0.0      -21.876844780621237        3.019013642860177        3.697765607783754      965.116979903489210        0.001919599897991    30857.980755148907000  5189422.961304485800000  1303761.411004173100000     1919.599897991420400     2035.760024744731500    96965.282764291609000    39678.086129527350000       88.931510001411183       71.119303186992852       75.426328290234437    -2271.408388594990400    18238.178215659122000     2721.515184380805300      275.381253872824460        6.000000000000000      162.014874554850730    24386.284842798788000     2687.909968969783700     7242.954379491124200        0.000000000058204                      0.0        4.871802870904753                      0.0        1.771814540271438        0.346224708452756                      0.0                      0.0        0.320823573243818        0.000001800000000        0.000000600000000
      200.632700948809120        0.000000000000442        0.000000000014375        0.000003356334797        0.000032020620319        0.000185992326769        0.000010367910871        0.000114700389219        0.000011397663247        0.000061451344205        0.003667070119951        0.000000788182453        0.000008562654638        0.000000000000001        0.000035695431540        0.016500104698115        0.266013252499165        0.033308161590387        0.000033557414959        0.000672574466164        0.000010367910871        0.000000677239992        0.000000000196497        0.000000000005585        0.000000000000000        0.000033846251559        0.000125267178678        0.000000955628920        0.000000000000000        0.000060995012747        0.000011680467698        0.000000000000453        0.000000000021182        0.000000000069339        0.000000000014108        0.000000000000695        0.000000000002793        0.000000000000143        0.000000000000000        0.000000000025778        0.000000000001850        0.000000000040517        0.000000000003183        0.000000000000030        0.000000000004989        0.000000000000030        0.000000000006375        0.000000000000315        0.000000000000000        0.000698416117952        0.001710122089913        0.000000000097094        0.000000915554278        0.000000000016425        0.000000000150532        0.000000002152952        0.000000000161115        0.000000001649384        0.000000000001038        0.000000071308976                      0.0                      0.0      -24.842027672090296        2.936444069102989        3.581708465069610     1103.849404609196200        0.001602720117530    30749.459851689367000  5197362.045368782200000  1291791.118532837100000     1602.720117529653200     1702.306454267227500    96729.533740785511000    37651.857410455028000       94.589896893949899       73.383931305909442       77.950530943987786    -2572.118680686060500    18595.521049321917000     2701.916711361294300      275.286218288582120        6.000000000000000      131.308658017136590    23510.012093570549000     3092.661309795406400     7610.292473259221000        0.000000000051769        0.000000000149825        5.136179107572135                      0.0        1.916025738558854        0.399838275436694                      0.0                      0.0        0.328441736859181        0.000001800000000        0.000000600000000
      200.633491241280320        0.000000000000406        0.000000000014514        0.000003599491537        0.000034232450592        0.000186765721298        0.000010459339767        0.000116859003474        0.000011511067654        0.000062128539317        0.003682111930123        0.000000803485204        0.000008703913824        0.000000000000002        0.000036084930848        0.016560078595458        0.266289310544745        0.033328946453197        0.000034871416966        0.000674057341651        0.000010459339767        0.000000687107224        0.000000000496549        0.000000000006757        0.000000000000000        0.000034380467077        0.000125764335413        0.000000974077526        0.000000000000001        0.000061387555400        0.000011818479350        0.000000000001159        0.000000000053766        0.000000000175992        0.000000000035783        0.000000000001771        0.000000000007133        0.000000000000365        0.000000000000000        0.000000000065738        0.000000000004731        0.000000000103270        0.000000000008125        0.000000000000077        0.000000000012749        0.000000000000076        0.000000000016259        0.000000000000805        0.000000000000000        0.000701759260031        0.001718721631844        0.000000000246259        0.000000934308035        0.000000000041612        0.000000000381614        0.000000002569573        0.000000000408191        0.000000003175515        0.000000000002652        0.000000069930261                      0.0                      0.0      -27.771560447336146        2.833477076550905        3.465807207867493     1130.249018018507500        0.001316822380184    30717.913385617689000  5205600.070780199000000  1279460.643577067600000     1316.822380184025200     1400.854939678578800    96570.031069518227000    35770.116765315892000       99.153501752803933       74.711712761278349       79.482467943014598    -2856.171196982355500    18927.366667605653000     2677.755394353639100      275.157791056241990        6.000000000000000      105.675102117995000    23053.909655929696000     3240.877012286480300     7966.316843032149300        0.000000000046439        0.000000000036731        5.343427214345670                      0.0        1.945933593170692        0.471271488342334                      0.0                      0.0        0.312155579939048        0.000001800000000        0.000000600000000
      200.634281533751480        0.000000000000341        0.000000000013138        0.000003712953875        0.000035070775407        0.000182181759500        0.000010243307581        0.000115412519354        0.000011285465562        0.000060964886720        0.003590635843648        0.000000795125667        0.000008586986171        0.000000000000005        0.000035402427634        0.016146719178880        0.259047149483320        0.032415364409553        0.000035144658512        0.000656462810380        0.000010243307581        0.000000676911051        0.000000000964971        0.000000000007879        0.000000000000000        0.000033890035925        0.000122639705421        0.000000963621711        0.000000000000003        0.000059988980486        0.000011603277267        0.000000000002262        0.000000000104658        0.000000000342493        0.000000000069621        0.000000000003452        0.000000000013928        0.000000000000712        0.000000000000000        0.000000000128174        0.000000000009235        0.000000000201292        0.000000000015853        0.000000000000150        0.000000000024870        0.000000000000149        0.000000000031708        0.000000000001569        0.000000000000000        0.000684725911870        0.001676714076170        0.000000000479050        0.000000925858130        0.000000000080927        0.000000000742456        0.000000003042067        0.000000000794021        0.000000005466862        0.000000000005174        0.000000070652639                      0.0                      0.0      -30.632454634861038        2.621033468790672        3.354666120271973     1130.895937611703400        0.001018065573474    30700.990287562032000  5213978.438110144800000  1266830.347481995400000     1018.065573473953600     1084.312111153869600    96203.973096062167000    34035.680967196982000       97.995606436730796       71.829123011224368       76.505770773310118    -3140.835866170176400    19267.516504051109000     2655.820110792825300      275.325881180056000        6.000000000000000       84.959930127062606    23112.376607910890000     3263.160625553275200     8308.117157219929100        0.000000000052464        0.000000000295630        5.049724721348041                      0.0        1.930762573310361        0.364755320494240                      0.0                      0.0        0.310627735719210        0.000001800000000        0.000000600000000
      200.635071826222680        0.000000000000544        0.000000000010725        0.000003768834187        0.000035220905831        0.000174407158337        0.000009857073507        0.000111841902871        0.000010867898900        0.000058779365282        0.003436133507463        0.000000775048368        0.000008336023462        0.000000000000009        0.000034133629360        0.015454518952954        0.247366590924067        0.030951513956985        0.000035047060600        0.000627684411265        0.000009857073507        0.000000656394958        0.000000001799201        0.000000000009373        0.000000000000000        0.000032861763405        0.000117413905407        0.000000938576742        0.000000000000007        0.000057551216288        0.000011196075211        0.000000000004228        0.000000000195326        0.000000000639138        0.000000000130037        0.000000000006446        0.000000000026034        0.000000000001329        0.000000000000000        0.000000000239452        0.000000000017260        0.000000000375883        0.000000000029611        0.000000000000280        0.000000000046452        0.000000000000278        0.000000000059220        0.000000000002928        0.000000000000000        0.000655752474593        0.001605457745490        0.000000000894275        0.000000904820329        0.000000000150996        0.000000001386222        0.000000003780261        0.000000001482384        0.000000009483300        0.000000000009653        0.000000072616719                      0.0                      0.0      -33.747490804621393        2.202330323007688        3.224392601184358     1235.077626856774900        0.000648996786264    30591.751276431838000  5222401.339588730600000  1254042.110898219300000      648.996786263563880      691.518750604798580    95250.722344287409000    32466.484148638971000       82.462031272854787       58.873760635373856       62.733559933387745    -3449.044674303311700    19533.672467129843000     2639.102715185771600      275.207747629184720        6.000000000000000       66.086385872576457    23273.681304216894000     3628.144400498710600     8630.196386919175000        0.000000000055170        0.000000000169407        4.959655015367763                      0.0        1.805046547901355        0.379669818802431                      0.0                      0.0        0.345556069402308        0.000001800000000        0.000000600000000
      200.635862118693890        0.000000000000475        0.000000000011371        0.000003724782590        0.000034730782472        0.000169885700760        0.000009611944809        0.000109264249783        0.000010600919690        0.000057330449193        0.003347580534194        0.000000757767039        0.000008142931746        0.000000000000009        0.000033288539809        0.015056163478027        0.240815581804748        0.030136688338886        0.000034424875084        0.000611398276961        0.000009611944809        0.000000641165754        0.000000001977196        0.000000000009527        0.000000000000000        0.000032087395903        0.000114411790767        0.000000917425141        0.000000000000008        0.000056087824720        0.000010920782726        0.000000000004647        0.000000000214624        0.000000000702228        0.000000000142681        0.000000000007085        0.000000000028614        0.000000000001462        0.000000000000000        0.000000000263135        0.000000000018971        0.000000000413102        0.000000000032559        0.000000000000308        0.000000000051069        0.000000000000306        0.000000000065090        0.000000000003220        0.000000000000000        0.000638991122691        0.001564465019165        0.000000000982355        0.000000885265767        0.000000000165873        0.000000001522354        0.000000003892290        0.000000001627725        0.000000010322033        0.000000000010616        0.000000074642978        0.000000000637810        0.000000000338601      -35.741554579329275        2.230496083062144        3.144732988363987     1179.811428371845100        0.000587311824697    30633.266036264038000  5230907.604917309200000  1241033.473503588000000      587.311824697430670      626.678784086431850    93769.225992134379000    31469.719604017511000       90.495052959854320       63.149653263939953       67.383841649625680    -3640.231903692681000    19741.122173762149000     2609.927289235575700      275.253716116390140        6.000000000000000       55.920580198168899    23132.456441583723000     3588.898471847297100     8841.176513719268800        0.000000000051905       -0.000000000442280                      0.0                      0.0        1.576356053566253                      0.0                      0.0                      0.0        0.342559786419000        0.000001800000000        0.000000600000000
      200.636652411165070        0.000000000000459        0.000000000008462        0.000003701389176        0.000034031919373        0.000159692062236        0.000009079741178        0.000103794777690        0.000010027099591        0.000054274269074        0.003144005179140        0.000000727140611        0.000007769163295        0.000000000000017        0.000031522883069        0.014144170062691        0.225851972870213        0.028267955468286        0.000033834354857        0.000574126953117        0.000009079741178        0.000000612325590        0.000000003707725        0.000000000011473        0.000000000000000        0.000030570244585        0.000107480636990        0.000000878450014        0.000000000000023        0.000052815001840        0.000010361676687        0.000000000008677        0.000000000401791        0.000000001314115        0.000000000267172        0.000000000013238        0.000000000053452        0.000000000002731        0.000000000000000        0.000000000491719        0.000000000035436        0.000000000772065        0.000000000060832        0.000000000000576        0.000000000095394        0.000000000000571        0.000000000121620        0.000000000006003        0.000000000000000        0.000600607153929        0.001470374916725        0.000000001839054        0.000000853901660        0.000000000310621        0.000000002849687        0.000000005232663        0.000000003047603        0.000000018481064        0.000000000019847        0.000000066473808        0.000000000703695        0.000000000328995      -37.566326849490778        2.029784370338812        3.056959527701707     1208.368677762207400        0.000451788496043    30600.433784489745000  5239540.213247989300000  1227789.154956650500000      451.788496042855970      481.895672204655110    92354.521153374240000    30481.775977733578000       80.066891483659504       55.138103445538185       58.807796631847360    -3820.078977462706500    19774.992682023851000     2596.893603372089300      275.204803358949110        6.000000000000000       48.268074849156626    22929.506275962274000     3584.677898568791100     9057.041594469434100        0.000000000053654       -0.000000000632272                      0.0                      0.0        1.442506710284683                      0.0                      0.0                      0.0        0.314580099226550        0.000001800000000        0.000000600000000
      200.637442703636250        0.000000000000483        0.000000000006670        0.000004119571951        0.000037457309871        0.000170251051162        0.000009724217664        0.000111631080771        0.000010750033962        0.000058222802291        0.003351487625562        0.000000789211905        0.000008390216864        0.000000000000028        0.000033818805335        0.015070952546218        0.240540307733622        0.030098686007686        0.000037417559291        0.000612071945587        0.000009724217664        0.000000662115710        0.000000005995522        0.000000000014748        0.000000000000000        0.000032966034754        0.000114673215814        0.000000951159881        0.000000000000051        0.000056434860192        0.000011126527671        0.000000000013970        0.000000000648570        0.000000002119892        0.000000000431246        0.000000000021334        0.000000000086046        0.000000000004396        0.000000000000000        0.000000000792174        0.000000000057011        0.000000001243369        0.000000000097967        0.000000000000928        0.000000000153627        0.000000000000920        0.000000000195934        0.000000000009655        0.000000000000000        0.000640828753931        0.001569188467679        0.000000002968276        0.000000931482740        0.000000000501587        0.000000004600936        0.000000007264033        0.000000004921277        0.000000029313160        0.000000000031952        0.000000070543496        0.000000000516784        0.000000000251279      -40.380923964025605        1.782599761440260        2.888359406120685     1325.786070476082400        0.000270084270152    30483.398304317150000  5248080.480082047200000  1214601.619169615200000      270.084270151577530      287.588725489658540    91391.761244258072000    29019.731307858990000       63.334604665703068       42.406234906585915       45.151930547855798    -4095.628483722018700    19482.369604200965000     2594.334907593402500      275.213598931284310        6.201891925374641       39.221638264805314    22848.293052649140000     3880.067519293913400     9385.697639070656800        0.000000000064699       -0.000000000628289                      0.0                      0.0                      0.0                      0.0                      0.0                      0.0                      0.0        0.000001800000000        0.000000600000000
      200.638232996107460        0.000000000000449        0.000000000006820        0.000004735645680        0.000042022172506        0.000180646910196        0.000010407358830        0.000119998891798        0.000011534988665        0.000062537248427        0.003550525882825        0.000000871649178        0.000009148648886        0.000000000000061        0.000036351876988        0.015971216214413        0.254421839250296        0.031835668748491        0.000042947902879        0.000648824979109        0.000010407358830        0.000000726666247        0.000000012985690        0.000000000023044        0.000000000000000        0.000035828372687        0.000121796524851        0.000001043574455        0.000000000000174        0.000060101041979        0.000011985547688        0.000000000029929        0.000000001399510        0.000000004569733        0.000000000930339        0.000000000045837        0.000000000184453        0.000000000009419        0.000000000000000        0.000000001700682        0.000000000122092        0.000000002670702        0.000000000210135        0.000000000001990        0.000000000329395        0.000000000001973        0.000000000420610        0.000000000020641        0.000000000000000        0.000680239695706        0.001665435581889        0.000000006404774        0.000001043602683        0.000000001083432        0.000000009931203        0.000000012996025        0.000000010631038        0.000000061978692        0.000000000068498        0.000000070559316        0.000000000423100        0.000000000240651      -43.097947592732304        1.779694738516974        2.743726639949204     1321.672821716913400        0.000210514770229    30497.479490857710000  5256469.782666736300000  1201572.839231872200000      210.514770228638720      223.918901417377130    90517.657830134151000    27714.102871790928000       65.281056447690517       42.271587117284938       44.960265057631517    -4360.481184363890900    19387.177128298717000     2585.959963767880700      275.100068016800720        6.771005399806612       33.592461236711685    22915.483856428200000     3978.213381967330900     9689.789345971839800        0.000000000067549       -0.000000000331928                      0.0                      0.0                      0.0                      0.0                      0.0                      0.0                      0.0        0.000001800000000        0.000000600000000
      200.639023288578640        0.000000000000321        0.000000000007824        0.000004918464361        0.000043683265995        0.000188183040571        0.000010835460209        0.000124984665765        0.000012001677832        0.000065064134867        0.003698461312722        0.000000905626544        0.000009511142366        0.000000000000062        0.000037824376463        0.016636643528684        0.265081693115598        0.033174971357265        0.000044523755089        0.000675964882058        0.000010835460209        0.000000755429663        0.000000013256516        0.000000000023547        0.000000000000000        0.000037248764327        0.000126853967780        0.000001084250409        0.000000000000172        0.000062578312547        0.000012472214590        0.000000000030610        0.000000001430997        0.000000004670070        0.000000000950838        0.000000000046872        0.000000000188610        0.000000000009633        0.000000000000000        0.000000001739422        0.000000000124817        0.000000002730103        0.000000000214948        0.000000000002035        0.000000000336826        0.000000000002018        0.000000000430105        0.000000000021112        0.000000000000000        0.000708459157897        0.001734654702771        0.000000006546042        0.000001083920293        0.000000001106522        0.000000010152470        0.000000013317749        0.000000010861390        0.000000063361600        0.000000000070056        0.000000046840163        0.000000000448448        0.000000000251420      -44.189969197514948        1.765580561875458        2.748109862379840     1328.118299187668300        0.000207987970116    31467.912324910889000  5265610.809249999000000  1189405.115847606200000      207.987970115939700      221.182433949755730    89954.387836721959000    27254.129944621953000       72.257924453946430       46.345178160256680       49.285629389472277    -4461.267503308565200    19994.660352529747000     2568.315584914891600      275.013212469878970        6.736235708074137       30.142149249425337    23124.025733737715000     3973.788537963443100     9798.811057796381600        0.000000000050371       -0.000000000063226                      0.0                      0.0                      0.0                      0.0                      0.0                      0.0                      0.0        0.000001800000000        0.000000600000000
      200.639813581049790        0.000000000000595        0.000000000007505        0.000005080083522        0.000045172005833        0.000194998773840        0.000011217628456        0.000129427443799        0.000012422693822        0.000067334241874        0.003833057299380        0.000000935707669        0.000009827752799        0.000000000000063        0.000039147386742        0.017240755536285        0.274832052486511        0.034390457415023        0.000045893632160        0.000700610607174        0.000011217628456        0.000000781040838        0.000000013454331        0.000000000023870        0.000000000000000        0.000038516981591        0.000131451824565        0.000001119724858        0.000000000000169        0.000064822338927        0.000012907988835        0.000000000031064        0.000000001450117        0.000000004736535        0.000000000964179        0.000000000047546        0.000000000191445        0.000000000009777        0.000000000000000        0.000000001764226        0.000000000126807        0.000000002770632        0.000000000218055        0.000000000002065        0.000000000341880        0.000000000002047        0.000000000436362        0.000000000021426        0.000000000000000        0.000734122732796        0.001797242160571        0.000000006637385        0.000001119069121        0.000000001122238        0.000000010295323        0.000000013536396        0.000000011015960        0.000000064270470        0.000000000071091        0.000000054765866        0.000000000462537        0.000000000268239      -44.260348058339844        1.699359829166442        2.770067586267617     1329.590274151318500        0.000200076043134    31961.174335666634000  5276400.732039898600000  1179065.574938013000000      200.076043133729340      212.508544897042980    89755.983381065424000    27183.509324592957000       69.580348533675220       44.766680360120731       47.548023899592671    -4474.883464521834000    20257.355477117224000     2563.396161427125700      275.083676542920730        6.430152904993196       28.682192008124403    23155.343965140321000     4200.388871937733700     9815.821839413833000        0.000000000053782       -0.000000000041035                      0.0                      0.0                      0.0                      0.0                      0.0                      0.0                      0.0        0.000001800000000        0.000000600000000
      200.640603873521030        0.000000000000672        0.000000000006904        0.000005164335772        0.000045972709479        0.000198820165033        0.000011431052718        0.000131987086164        0.000012658861836        0.000068590097514        0.003909902148813        0.000000951608320        0.000010001066941        0.000000000000063        0.000039875520739        0.017579742850501        0.280459035180384        0.035087282496812        0.000046556042011        0.000714665000631        0.000011431052718        0.000000794790544        0.000000013422308        0.000000000023814        0.000000000000000        0.000039204466684        0.000134118233705        0.000001138748447        0.000000000000162        0.000066090204659        0.000013144490788        0.000000000031027        0.000000001446387        0.000000004727251        0.000000000962239        0.000000000047474        0.000000000191176        0.000000000009765        0.000000000000000        0.000000001760840        0.000000000126711        0.000000002766157        0.000000000217715        0.000000000002062        0.000000000341429        0.000000000002045        0.000000000435746        0.000000000021409        0.000000000000000        0.000748733210216        0.001833226160098        0.000000006623503        0.000001137430998        0.000000001119391        0.000000010272028        0.000000013540963        0.000000010987606        0.000000064162178        0.000000000071005        0.000000054912562        0.000000000455834        0.000000000255808      -44.715072177626951        1.889208750023826        2.724807359279835     1342.107830036891100        0.000226173481361    31939.129833375187000  5287399.991249586500000  1169176.981163934100000      226.173481361235760      241.063963705203090    89759.453575681138000    27210.224627201067000       83.884638785227878       53.250363996535327       56.757783747977868    -4525.528482631419100    20028.298288040773000     2546.596551691687600      275.034749075821990        6.981849737171399       29.750094172600424    23277.837200986651000     4110.057034386384700     9809.373699274618000        0.000000000082550       -0.000000000061575                      0.0                      0.0                      0.0                      0.0                      0.0                      0.0                      0.0        0.000001800000000        0.000000600000000
      200.641394165992180        0.000000000000648        0.000000000007689        0.000004833368290        0.000043079413532        0.000186802638455        0.000010722677631        0.000123875026871        0.000011869981341        0.000064328018591        0.003671912439043        0.000000891021192        0.000009374981790        0.000000000000058        0.000037394639248        0.016510191540538        0.263454579412104        0.032964789633755        0.000043480279273        0.000671196252976        0.000010722677631        0.000000744612523        0.000000012324696        0.000000000021880        0.000000000000000        0.000036738770364        0.000125926305669        0.000001067042846        0.000000000000144        0.000062038444570        0.000012320145315        0.000000000028539        0.000000001329195        0.000000004344762        0.000000000884245        0.000000000043650        0.000000000175825        0.000000000008981        0.000000000000000        0.000000001619184        0.000000000116487        0.000000002543519        0.000000000200223        0.000000000001897        0.000000000313955        0.000000000001880        0.000000000400668        0.000000000019692        0.000000000000000        0.000703044124647        0.001721394243382        0.000000006086029        0.000001064361011        0.000000001029095        0.000000009435655        0.000000012475241        0.000000010095958        0.000000058977121        0.000000000065303        0.000000061643011        0.000000000477605        0.000000000237039      -44.876366200885897        2.098707581946802        2.693434975172983     1387.857760255057400        0.000259142255294    31919.518053747077000  5298231.826940651100000  1159372.006136624100000      259.142255293989250      277.070435802875290    89789.975720376809000    27247.317206159325000       98.607761289215404       62.116664824603355       66.413972164967731    -4549.926687157687400    19788.647203765722000     2522.514308581249700      275.055045355253870        7.000000000000000       29.004398770538756    23210.936627137922000     4193.405517326458700     9800.423924282396900        0.000000000072220       -0.000000000142943                      0.0                      0.0        1.157394805180503                      0.0                      0.0                      0.0        0.320109262330596        0.000001800000000        0.000000600000000
      200.642184458463420        0.000000000000613        0.000000000007181        0.000004482701541        0.000039993187991        0.000173808777647        0.000009967585477        0.000115234433523        0.000011030252600        0.000059775581348        0.003416609251203        0.000000826659261        0.000008703223555        0.000000000000053        0.000034753912301        0.015367710015520        0.245281491162629        0.030688004982832        0.000040232459313        0.000624637038190        0.000009967585477        0.000000691267411        0.000000011201582        0.000000000019902        0.000000000000000        0.000034105337336        0.000117197360466        0.000000990102081        0.000000000000126        0.000057704758182        0.000011447907581        0.000000000025979        0.000000001209548        0.000000003952844        0.000000000804427        0.000000000039728        0.000000000160087        0.000000000008176        0.000000000000000        0.000000001474194        0.000000000106008        0.000000002315063        0.000000000182250        0.000000000001727        0.000000000285938        0.000000000001712        0.000000000364657        0.000000000017923        0.000000000000000        0.000654170995623        0.001601595798462        0.000000005536334        0.000000987089973        0.000000000936208        0.000000008583290        0.000000011383321        0.000000009184388        0.000000053672594        0.000000000059447        0.000000052799252        0.000000000475192        0.000000000243772      -44.939268582427630        2.139973977217982        2.683334158416962     1358.929643089413000        0.000263085772042    31969.952218823044000  5309028.759864611600000  1149747.663692786400000      263.085772042165840      281.438029951832790    89812.459155425182000    27255.137738772122000      101.056767346853660       63.542090177342864       67.975537710572027    -4545.928419597377800    19717.243904434250000     2492.349038163415600      275.104484914345510        7.000000000000000       29.056026450545641    23298.928370603429000     4181.132821695340700     9798.557207036083100        0.000000000053096       -0.000000000070341                      0.0        2.303427632214738        1.137472993333980                      0.0                      0.0                      0.0        0.318359516321437        0.000001800000000        0.000000600000000
      200.642974750934630        0.000000000000567        0.000000000007076        0.000004022019244        0.000035915211886        0.000156491619447        0.000008965710528        0.000103766089196        0.000009923834153        0.000053754691176        0.003076200596040        0.000000742064191        0.000007817725200        0.000000000000046        0.000031251604592        0.013832152762312        0.220979505200992        0.027647518401117        0.000036024234322        0.000562569462595        0.000008965710528        0.000000620915924        0.000000009860666        0.000000000017519        0.000000000000000        0.000030640732837        0.000105471733998        0.000000889332298        0.000000000000107        0.000051940601325        0.000010291898025        0.000000000022899        0.000000001064957        0.000000003480516        0.000000000708272        0.000000000034999        0.000000000141148        0.000000000007206        0.000000000000000        0.000000001299585        0.000000000093455        0.000000002039561        0.000000000160670        0.000000000001522        0.000000000251930        0.000000000001508        0.000000000321320        0.000000000015796        0.000000000000000        0.000588932419483        0.001442103670895        0.000000004875076        0.000000885566127        0.000000000824227        0.000000007558095        0.000000010050922        0.000000008087279        0.000000047280008        0.000000000052388        0.000000053744668        0.000000000452913        0.000000000243317      -44.917540574976080        2.030729823495791        2.678276271047188     1284.284810944658100        0.000237441504640    31925.814506071136000  5319675.226785912200000  1139936.585059548500000      237.441504640005770      253.608473213044990    89822.015721888296000    27245.515844683378000       90.934296590504758       57.284770207932894       61.187862128325243    -4531.185617753604700    19653.334403609795000     2461.702011402160700      275.065573770491820        7.000000000000000       29.141145737243395    23325.573196761674000     3858.539283474326100     9800.857660433306600        0.000000000058842        0.000000000083292                      0.0        4.269430623516895        1.102487656929926                      0.0                      0.0                      0.0        0.293574756018730        0.000001800000000        0.000000600000000
      200.643765043405810        0.000000000000461        0.000000000007212        0.000003910389465        0.000034992057991        0.000153115445760        0.000008759560925        0.000101393540361        0.000009693639355        0.000052490207925        0.003010346257997        0.000000722813458        0.000007622367419        0.000000000000044        0.000030520284783        0.013541764644842        0.216248749301060        0.027062263373397        0.000034942452997        0.000550456559857        0.000008759560925        0.000000605342465        0.000000009259637        0.000000000016557        0.000000000000000        0.000029888374933        0.000103308148810        0.000000866456130        0.000000000000097        0.000050775427781        0.000010046274022        0.000000000021539        0.000000000999944        0.000000003271087        0.000000000665422        0.000000000032901        0.000000000132762        0.000000000006777        0.000000000000000        0.000000001221500        0.000000000087899        0.000000001917618        0.000000000151020        0.000000000001431        0.000000000236884        0.000000000001418        0.000000000302063        0.000000000014868        0.000000000000000        0.000576088305416        0.001411114673949        0.000000004580863        0.000000861695865        0.000000000774194        0.000000007099427        0.000000009506635        0.000000007596810        0.000000044444993        0.000000000049270        0.000000052908709        0.000000000384488        0.000000000272096      -44.420704773273272        1.963340374164558        2.685138278273829     1473.605965608113400        0.000225330506041    31645.879194105790000  5330255.167454430800000  1130068.801082511900000      225.330506041373720      240.408730546481170    89909.069258039555000    27564.629634467532000       82.015968393670036       52.009183265947208       55.488106679903673    -4478.541151116469300    19464.167529591658000     2437.687657474967600      274.904167023450950        7.000000000000000       30.414152322213294    23210.813189305383000     4304.979308762313800     9725.163316978512700        0.000000000053191        0.000000000006029                      0.0        3.657103066509114        1.079930138913654                      0.0                      0.0                      0.0        0.283735272068685        0.000001800000000        0.000000600000000
      200.644555335876960        0.000000000000341        0.000000000007156        0.000003489323187        0.000031929031152        0.000147881269394        0.000008376415327        0.000096578019111        0.000009246119961        0.000049981773879        0.002909774868684        0.000000670897030        0.000007152124499        0.000000000000024        0.000029056370658        0.013100354401063        0.209601912737123        0.026231369929828        0.000031175891739        0.000532205210162        0.000008376415327        0.000000566485183        0.000000005030740        0.000000000011291        0.000000000000000        0.000028128573461        0.000099639471116        0.000000808164083        0.000000000000041        0.000048839276484        0.000009548726935        0.000000000011793        0.000000000545375        0.000000001782708        0.000000000362604        0.000000000017976        0.000000000072598        0.000000000003710        0.000000000000000        0.000000000668020        0.000000000048128        0.000000001047991        0.000000000082625        0.000000000000782        0.000000000129589        0.000000000000776        0.000000000165123        0.000000000008143        0.000000000000000        0.000555844244571        0.001361057585306        0.000000002495743        0.000000791592617        0.000000000421491        0.000000003866727        0.000000005964017        0.000000004135769        0.000000024560276        0.000000000026954        0.000000060122668        0.000000000435855        0.000000000272975      -40.865270677160801        1.872686437468219        2.819430827098246     1393.165584680813300        0.000252366554080    30715.674617380770000  5339809.025868995100000  1118927.082107418400000      252.366554079783900      269.017995646684140    90435.167063372181000    29565.671634647093000       67.031037493195512       44.020942386001416       46.951332353173278    -4116.007841724221200    19004.172409008872000     2416.014246168374500      274.602689809874680        6.535326259489947       38.954867278384505    22899.922519466410000     4118.404364579178900     9268.013948746949600        0.000000000030034       -0.000000000077810                      0.0        4.502000629279729        1.086426766783767                      0.0                      0.0                      0.0        0.311110495241632        0.000001800000000        0.000000600000000
      200.645345628348200        0.000000000000508        0.000000000007506        0.000002900725421        0.000027528072625        0.000144204860492        0.000008028582959        0.000091401841119        0.000008825537633        0.000047556044570        0.002842378175894        0.000000613430980        0.000006643762036        0.000000000000005        0.000027651737716        0.012797218372752        0.206041021163682        0.025787346266271        0.000026467565048        0.000520556711361        0.000008028582959        0.000000526517012        0.000000000983531        0.000000000005444        0.000000000000000        0.000026240577165        0.000097093425120        0.000000742683540        0.000000000000003        0.000047279524977        0.000009052100117        0.000000000002341        0.000000000107344        0.000000000351168        0.000000000071334        0.000000000003557        0.000000000014400        0.000000000000736        0.000000000000000        0.000000000132242        0.000000000009563        0.000000000207441        0.000000000016379        0.000000000000155        0.000000000025701        0.000000000000154        0.000000000032709        0.000000000001623        0.000000000000000        0.000541284795495        0.001324931498167        0.000000000490946        0.000000714922003        0.000000000082784        0.000000000760025        0.000000002384051        0.000000000812284        0.000000005284208        0.000000000005348        0.000000058939194        0.000000000456538        0.000000000269274      -34.370897618034206        1.998637982190843        3.109098880871301     1324.349614941568200        0.000480318710892    30189.569959876786000  5347795.016429313500000  1105760.953662055100000      480.318710892445320      511.552248803848500    91084.431051910302000    33239.997217788085000       61.233573840666971       43.806029042240148       46.646383066184157    -3468.318573221041300    18629.814301814833000     2390.629879662429600      274.434587929515660        6.056574796526684       62.776399002979616    22621.136604145817000     3756.709062687026300     8479.044415435635500        0.000000000051988       -0.000000000040825                      0.0                      0.0        1.499381769511866                      0.0                      0.0                      0.0        0.299005515174476        0.000001800000000        0.000000600000000
      200.646135920819350        0.000000000000647        0.000000000010091        0.000002427604245        0.000023420687358        0.000137363610500        0.000007549958138        0.000084721627291        0.000008277190951        0.000044480183431        0.002708160638009        0.000000561123415        0.000006124795341        0.000000000000001        0.000025884050243        0.012192019913418        0.197654681696675        0.024746082520090        0.000023007792322        0.000497701186533        0.000007549958138        0.000000487709270        0.000000000175632        0.000000000003208        0.000000000000000        0.000024241903185        0.000092494149100        0.000000679687151        0.000000000000000        0.000044785431512        0.000008453037236        0.000000000000417        0.000000000019131        0.000000000062652        0.000000000012730        0.000000000000633        0.000000000002564        0.000000000000131        0.000000000000000        0.000000000023553        0.000000000001701        0.000000000036972        0.000000000002917        0.000000000000028        0.000000000004576        0.000000000000027        0.000000000005825        0.000000000000290        0.000000000000000        0.000514773858437        0.001260602465798        0.000000000087593        0.000000652010564        0.000000000014776        0.000000000135586        0.000000001393301        0.000000000144953        0.000000001255271        0.000000000000952        0.000000073332862        0.000000000649606        0.000000000305186      -28.646870136975931        3.204789280151383        3.300364623996767     1566.731230984338700        0.001204584992856    29972.178442910950000  5355309.770345368400000  1092515.036264085700000     1204.584992856047400     1285.781854428572800    92203.520289430380000    36793.905663164020000       98.763898814177182       73.629791823854802       78.583529775610756    -2910.791581998124000    17541.265741425352000     2372.235303412166600      274.221750533648280        6.000000000000000       95.454947879477601    22338.951704605053000     4057.679480669512900     7773.619705879092200        0.000000000070874       -0.000000000099699        5.002051915482920                      0.0        1.671821041097414        0.573124895448980                      0.0                      0.0        0.295782294471504        0.000001800000000        0.000000600000000
      200.646926213290530        0.000000000000391        0.000000000013116        0.000002110335700        0.000020356213871        0.000132588380279        0.000007214560620        0.000079816670029        0.000007894563815        0.000042334738175        0.002612037773902        0.000000526912674        0.000005775980189        0.000000000000000        0.000024660851653        0.011769047640708        0.192046008510396        0.024053861064103        0.000020895801979        0.000482269922152        0.000007214560620        0.000000461969138        0.000000000043526        0.000000000002292        0.000000000000000        0.000022885421649        0.000089345389070        0.000000637957320        0.000000000000000        0.000043031113755        0.000008040128419        0.000000000000102        0.000000000004718        0.000000000015457        0.000000000003141        0.000000000000156        0.000000000000628        0.000000000000032        0.000000000000000        0.000000000005778        0.000000000000416        0.000000000009075        0.000000000000715        0.000000000000007        0.000000000001120        0.000000000000007        0.000000000001429        0.000000000000071        0.000000000000000        0.000496161771003        0.001214944355584        0.000000000021622        0.000000611938261        0.000000000003651        0.000000000033488        0.000000001075640        0.000000000035819        0.000000000523271        0.000000000000233        0.000000064410730        0.000000001012386        0.000000000403134      -24.898738123076477        3.882686175744565        3.385521419363931     1427.252638194468500        0.001680287205498    30053.004113997911000  5362223.830034695600000  1080221.266952750300000     1680.287205497953900     1793.276730609625200    93812.660160346975000    39660.919705311993000      106.053899920573060       81.427589717680675       86.905753423238153    -2527.951714844424700    16314.994797953010000     2371.092618428815500      274.225819533702460        6.000000000000000      123.829849510577830    22366.753865800434000     3708.655400144199100     7245.691428885537800        0.000000000033973       -0.000000000313078                      0.0                      0.0                      0.0                      0.0                      0.0                      0.0                      0.0        0.000001800000000        0.000000600000000
      200.647716505761760        0.000000000000246        0.000000000011616        0.000002017407964        0.000019354084724        0.000140514658760        0.000007568921233        0.000082492787159        0.000008268671697        0.000044261165444        0.002764221571023        0.000000544742500        0.000005991777693        0.000000000000000        0.000025799678461        0.012468034775891        0.204892831445129        0.025682300135856        0.000021009117797        0.000513338269412        0.000007568921233        0.000000481164385        0.000000000009737        0.000000000001884        0.000000000000000        0.000023757571598        0.000094746763284        0.000000659158278        0.000000000000000        0.000045385700058        0.000008402360428        0.000000000000022        0.000000000001047        0.000000000003430        0.000000000000698        0.000000000000034        0.000000000000137        0.000000000000007        0.000000000000000        0.000000000001270        0.000000000000091        0.000000000001998        0.000000000000157        0.000000000000001        0.000000000000245        0.000000000000001        0.000000000000314        0.000000000000016        0.000000000000000        0.000524818065680        0.001285236505690        0.000000000004805        0.000000632604472        0.000000000000813        0.000000000007447        0.000000000973577        0.000000000007976        0.000000000314770        0.000000000000051        0.000000058055640        0.000000001312095        0.000000000436687      -22.127147787257620        3.289169106598114        3.496474485612680     1309.218702161928600        0.001513329268843    30156.098320311085000  5368699.959060367200000  1068609.792093930100000     1513.329268843423100     1610.978289625352300    95466.959529161802000    42670.655586657092000       78.859710889525587       62.453828029771941       66.490067299568764    -2249.904561137327600    15967.292027646447000     2362.597528105401100      274.104511967825660        6.000000000000000      147.258263438239340    23245.995104149471000     3322.501252074530800     6725.498719279657100        0.000000000013924       -0.000000000873444                      0.0                      0.0                      0.0                      0.0                      0.0                      0.0                      0.0        0.000001800000000        0.000000600000000
      200.648506798232920        0.000000000000216        0.000000000011273        0.000001739966421        0.000016568162551        0.000134287824366        0.000007161452124        0.000076823667704        0.000007813595521        0.000041736204661        0.002637017003034        0.000000508935400        0.000005612776056        0.000000000000000        0.000024355348549        0.011899519559548        0.197344259180251        0.024763042680172        0.000019163920101        0.000493218738186        0.000007161452124        0.000000452507306        0.000000000001771        0.000000000001453        0.000000000000000        0.000022273315704        0.000090630126790        0.000000615555964        0.000000000000000        0.000043166956662        0.000007923415689        0.000000000000004        0.000000000000188        0.000000000000617        0.000000000000126        0.000000000000006        0.000000000000024        0.000000000000001        0.000000000000000        0.000000000000225        0.000000000000016        0.000000000000355        0.000000000000028        0.000000000000000        0.000000000000043        0.000000000000000        0.000000000000056        0.000000000000003        0.000000000000000        0.000500603922777        0.001225698470115        0.000000000000865        0.000000591238996        0.000000000000147        0.000000000001343        0.000000000823889        0.000000000001440        0.000000000219803        0.000000000000009        0.000000053519597        0.000000001235661        0.000000000342555      -17.865938267609273        2.268460640402860        3.692785347792362      947.749166628927240        0.001141114956804    30462.924957505067000  5374971.763924023100000  1057314.643726317000000     1141.114956804221500     1205.570249587634200    97095.277709438102000    45764.755857433644000       41.889579970437481       35.179129087833992       37.182064341417146    -1818.134180933170700    15753.619732918363000     2338.358268952967100      274.533798786941590        6.024156491779148      199.886322612976530    23658.272217357102000     2513.330672019416900     6222.214377668216900        0.000000000016000       -0.000000001641608                      0.0                      0.0                      0.0                      0.0                      0.0                      0.0                      0.0        0.000001800000000        0.000000600000000
      200.649297090704150        0.000000000000239        0.000000000011221        0.000001499422138        0.000014166533432        0.000127566672291        0.000006741981227        0.000071182667689        0.000007345906800        0.000039159636704        0.002500585011858        0.000000474119523        0.000005237865771        0.000000000000000        0.000022877167848        0.011299912848985        0.189015970005500        0.023739393009976        0.000017505817720        0.000471311552257        0.000006741981227        0.000000423930013        0.000000000000222        0.000000000001163        0.000000000000000        0.000020793730966        0.000086214329080        0.000000573164550        0.000000000000000        0.000040832659854        0.000007437262443        0.000000000000000        0.000000000000023        0.000000000000076        0.000000000000015        0.000000000000001        0.000000000000003        0.000000000000000        0.000000000000000        0.000000000000027        0.000000000000002        0.000000000000043        0.000000000000003        0.000000000000000        0.000000000000005        0.000000000000000        0.000000000000007        0.000000000000000        0.000000000000000        0.000474644075135        0.001162444550250        0.000000000000106        0.000000551251595        0.000000000000018        0.000000000000166        0.000000000710889        0.000000000000178        0.000000000172323        0.000000000000001        0.000000057326157        0.000000001069460        0.000000000324718      -14.048609278810558        1.897802671405201        3.867284967515439      889.226243102467830        0.001069024651046    30507.779555949674000  5381323.551554109900000  1045850.592479637900000     1069.024651046376200     1120.874380108479700    98574.432502579453000    48831.956156264903000       28.522955421523779       25.342151876806771       26.577106547943661    -1452.473129831037100    15540.448244866633000     2324.044912321922300      274.213415625404370        6.296048475903185      268.961392229619490    23063.084990452146000     2110.569658591294200     5748.926775484916100        0.000000000015511       -0.000000001002636                      0.0                      0.0                      0.0                      0.0                      0.0                      0.0                      0.0        0.000001800000000        0.000000600000000
      200.650087383175300        0.000000000000219        0.000000000011297        0.000001521991379        0.000014263024426        0.000143961850296        0.000007520589529        0.000078362662170        0.000008249617746        0.000043526877509        0.002813982237217        0.000000537129816        0.000005788675945        0.000000000000000        0.000025477221200        0.012719726987562        0.215743848008399        0.027139336811828        0.000019492166354        0.000537175154184        0.000007520589529        0.000000493396609        0.000000000000022        0.000000000001107        0.000000000000000        0.000023001128362        0.000097565986258        0.000000655926888        0.000000000000000        0.000046394522392        0.000008384736765        0.000000000000000        0.000000000000002        0.000000000000007        0.000000000000001        0.000000000000000        0.000000000000000        0.000000000000000        0.000000000000000        0.000000000000003        0.000000000000000        0.000000000000004        0.000000000000000        0.000000000000000        0.000000000000000        0.000000000000000        0.000000000000001        0.000000000000000        0.000000000000000        0.000534499898274        0.001307869904564        0.000000000000010        0.000000646185120        0.000000000000002        0.000000000000016        0.000000000727923        0.000000000000017        0.000000000164764        0.000000000000000        0.000000067063762        0.000000001044759        0.000000000350706      -11.637076860137970        1.896919269146831        3.964716692942050     1018.043449318130600        0.001180823886032    30384.069036449593000  5387626.444467827700000  1034416.369456549600000     1180.823886032073000     1235.416786297073900    99513.143383855917000    51666.564784149763000       26.703365186753068       24.350078352482189       25.479015661413065    -1217.929589382512600    15228.266865147518000     2309.952359650911100      274.098159222861450        6.441212920685866      314.341845100566840    22751.417212931334000     2307.824225499187800     5332.279632560813300        0.000000000014013       -0.000000000205307                      0.0                      0.0                      0.0                      0.0                      0.0                      0.0                      0.0        0.000001800000000        0.000000600000000
      200.650877675646480        0.000000000000216        0.000000000012275        0.000001342654833        0.000012527268365        0.000135479942985        0.000007018359010        0.000072425746302        0.000007752917103        0.000040427267234        0.002642653791226        0.000000509963093        0.000005370464755        0.000000000000000        0.000024635910995        0.011940307148950        0.204874160387631        0.025786762310081        0.000018367898864        0.000509434513487        0.000007018359010        0.000000479323660        0.000000000000007        0.000000000000952        0.000000000000000        0.000021350906441        0.000091949595968        0.000000628593471        0.000000000000000        0.000044001914220        0.000007915160186        0.000000000000000        0.000000000000001        0.000000000000002        0.000000000000000        0.000000000000000        0.000000000000000        0.000000000000000        0.000000000000000        0.000000000000001        0.000000000000000        0.000000000000001        0.000000000000000        0.000000000000000        0.000000000000000        0.000000000000000        0.000000000000000        0.000000000000000        0.000000000000000        0.000502077061089        0.001229293229727        0.000000000000003        0.000000633218997        0.000000000000001        0.000000000000005        0.000000000648258        0.000000000000006        0.000000000144089        0.000000000000000        0.000000067475881        0.000000001096427        0.000000000378667       -9.459548188825629        1.936433845642908        4.033075673255047     1098.843739296973600        0.001301467685869    30302.812674470948000  5393696.204031851100000  1023342.998835609900000     1301.467685868689600     1360.518526761900600   100007.125773617870000    54497.608572989724000       25.539791212924033       23.779114413647608       24.861119443796461     -993.779923890564530    14669.079515433375000     2297.673648524854800      274.023516923523060        6.072697251391943      333.857098431503120    22788.057946560250000     2448.418861468251600     4934.597390023218400        0.000000000012005        0.000000000144635                      0.0                      0.0        1.159983318461132                      0.0                      0.0                      0.0        0.254466231061152        0.000001800000000        0.000000600000000
      200.651667968117690        0.000000000000182        0.000000000012961        0.000001138799690        0.000010543361385        0.000127513845657        0.000006514748211        0.000066105439834        0.000007287774244        0.000037212316445        0.002476158640129        0.000000487840680        0.000004943318930        0.000000000000000        0.000025114559874        0.011195085359747        0.195921473673559        0.024694932193256        0.000017414211974        0.000486100540573        0.000006514748211        0.000000475477372        0.000000000000001        0.000000000000793        0.000000000000000        0.000019657635410        0.000086847387489        0.000000610771922        0.000000000000000        0.000041957372240        0.000007501103697        0.000000000000000        0.000000000000000        0.000000000000000        0.000000000000000        0.000000000000000        0.000000000000000        0.000000000000000        0.000000000000000        0.000000000000000        0.000000000000000        0.000000000000000        0.000000000000000        0.000000000000000        0.000000000000000        0.000000000000000        0.000000000000000        0.000000000000000        0.000000000000000        0.000471087942721        0.001153234727109        0.000000000000000        0.000000638123114        0.000000000000000        0.000000000000000        0.000000000565360        0.000000000000001        0.000000000124918        0.000000000000000        0.000000064399704        0.000000001185413        0.000000000399965       -5.706077127660462        1.944152774388271        4.237362092816679      972.219388446404760        0.001663588086909    30405.243428246747000  5399614.807766864100000  1012476.157348869400000     1663.588086909376700     1731.784311809261500   100271.832101158490000    58987.152554796063000       24.842338690693222       24.117710945702761       25.111367314804408     -616.388778036418560    14902.609858345731000     2288.344065437262500      274.157669089101030        7.005706135081865      485.183219364165210    23271.396402344461000     2310.954349274333300     4341.799234187572400        0.000000000015515        0.000000000361556                      0.0                      0.0        1.035704019959226                      0.0                      0.0                      0.0        0.259284789938536        0.000001800000000        0.000000600000000
      200.652458260588870        0.000000000000192        0.000000000012252        0.000000832886111        0.000007619650615        0.000111566310084        0.000005552419924        0.000054717447939        0.000006359616705        0.000031242996158        0.002146110358828        0.000000437760201        0.000004156113432        0.000000000000000        0.000025639567457        0.009722925382072        0.176626264331007        0.022365937612653        0.000015497079065        0.000436867359592        0.000005552419924        0.000000452516870        0.000000000000000        0.000000000000585        0.000000000000000        0.000016541362406        0.000076525944399        0.000000562525056        0.000000000000000        0.000037525652859        0.000006645013223        0.000000000000000        0.000000000000000        0.000000000000000        0.000000000000000        0.000000000000000        0.000000000000000        0.000000000000000        0.000000000000000        0.000000000000000        0.000000000000000        0.000000000000000        0.000000000000000        0.000000000000000        0.000000000000000        0.000000000000000        0.000000000000000        0.000000000000000        0.000000000000000        0.000409581994257        0.001003090968088        0.000000000000000        0.000000624711225        0.000000000000000        0.000000000000000        0.000000000441915        0.000000000000000        0.000000000099372        0.000000000000000        0.000000059288280        0.000000001334514        0.000000000419526       -1.009822933335544        1.811234649562331        4.456527240780985      758.777612764819650        0.001769619773809    30589.085033907129000  5405583.728786625900000  1001502.366906325900000     1769.619773809040900     1828.362707479134800   100402.338259831900000    66413.558892077170000       20.257083803922548       20.673727370371147       21.365174547517785     -161.860659531199640    14688.538925367549000     2287.857731059678400      274.071348559987650        7.241749756231808      620.488869821724390    23510.293829075701000     1840.366648735715900     3432.638895087507100        0.000000000017471        0.000000000334812                      0.0                      0.0        0.946505519790917                      0.0                      0.0                      0.0        0.278842504188814        0.000001800000000        0.000000600000000
      200.653248553060140        0.000000000000212        0.000000000013229        0.000000554608331        0.000005011344952        0.000091755963852        0.000004395994312        0.000042009042322        0.000005185237271        0.000024279828386        0.001739588117805        0.000000366577734        0.000003234423100        0.000000000000000        0.000024394398587        0.007907876101941        0.151647257337886        0.019317404061572        0.000012915037446        0.000373182400550        0.000004395994312        0.000000404184099        0.000000000000000        0.000000000000398        0.000000000000000        0.000012888476252        0.000063586945032        0.000000484844587        0.000000000000000        0.000031543890345        0.000005516030131        0.000000000000000        0.000000000000000        0.000000000000000        0.000000000000000        0.000000000000000        0.000000000000000        0.000000000000000        0.000000000000000        0.000000000000000        0.000000000000000        0.000000000000000        0.000000000000000        0.000000000000000        0.000000000000000        0.000000000000000        0.000000000000000        0.000000000000000        0.000000000000000        0.000333698689128        0.000817104011534        0.000000000000000        0.000000576750413        0.000000000000000        0.000000000000000        0.000000000318381        0.000000000000000        0.000000000072840        0.000000000000000        0.000000053636069        0.000000001300432        0.000000000359253        3.169984832059873        3.025599292982489        4.616902047823229      667.446223939724860        0.004217777395453    30652.936784240414000  5411379.290383625800000   990786.914879824730000     4217.777395453097600     4420.573992912518400   100437.933689567410000    75450.018506310880000       40.885074846712435       40.904432933636713       42.863938652245345      260.379339409603520    13989.702376531341000     2291.433189214273600      273.684621166059860        6.137799272327502      623.530688648665770    23484.345441723766000     1508.521229293079400     2424.413679187552100        0.000000000024179        0.000000000382640                      0.0                      0.0                      0.0                      0.0                      0.0                      0.0                      0.0        0.000001800000000        0.000000600000000
      200.654038626396410        0.000000000000297        0.000000000013853        0.000000345025913        0.000003080421690        0.000074518794015        0.000003358627564        0.000031074745872        0.000004108583447        0.000018081281741        0.001379943760239        0.000000297059490        0.000002408035571        0.000000000000000        0.000022572614759        0.006317120914576        0.131934728046268        0.016960204103209        0.000010467112070        0.000322199459131        0.000003358627564        0.000000352807815        0.000000000000000        0.000000000000251        0.000000000000000        0.000009615134350        0.000052545165076        0.000000406037235        0.000000000000000        0.000026076880355        0.000004459756974        0.000000000000000        0.000000000000000        0.000000000000000        0.000000000000000        0.000000000000000        0.000000000000000        0.000000000000000        0.000000000000000        0.000000000000000        0.000000000000000        0.000000000000000        0.000000000000000        0.000000000000000        0.000000000000000        0.000000000000000        0.000000000000000        0.000000000000000        0.000000000000000        0.000267164740090        0.000654124269716        0.000000000000000        0.000000522498319        0.000000000000000        0.000000000000000        0.000000000215192        0.000000000000000        0.000000000049688        0.000000000000000        0.000000051595285        0.000000001621937        0.000000000286245        9.821473571069301        4.872070115905849        4.952972684020510      486.900623940229710        0.010293959711116    31042.602547899725000  5417057.137648204300000   980378.434290879410000    10293.959711116138000    10838.014814891969000   100405.347085231410000    87377.456796190760000       73.964989652748173       73.042098625838108       76.906723368714111      945.652424194610380    14045.259341492616000     2290.837059414580800      272.886020760576120        6.000000000000000      840.807033418499490    23600.125040489969000     1179.342932597060100     1235.640383095318600        0.000000000070506        0.000000000481051                      0.0                      0.0                      0.0                      0.0                      0.0                      0.0                      0.0        0.000001800000000        0.000000600000000
[truncated: 7,279 more chars]
