# Supplementary material for: The atmospheric chemistry box model CAABA/MECCA-3.0
Source: Copernicus journal article supplement (doi:10.5194/gmd-4-373-2011), 2011-05-06
Supplement: Supplementary file 9 [file gmd-4-373-2011-supplement.zip › caaba_3.0/multirun/input/example_debug.txt]

                     Tgps                       OH                      HO2               j_CH3COCH3                 j_CH3CHO               j_CH3COCHO                 j_CH3OOH                   j_COH2                   j_H2O2                   j_CHOH                   j_HONO                   j_HNO3                   j_HNO4                    j_N2O                   j_N2O5                    j_NO2                   j_NO2O                   j_NOO2                    j_O1D                    j_O3P                    j_PAA                    j_PAN                    j_s10                    j_s18                    j_s19                    j_s20                    j_s21                    j_s25                    j_s27                    j_s28                    j_s29                    j_s30                    j_s31                    j_s32                    j_s33                    j_s34                    j_s35                    j_s36                    j_s37                    j_s38                    j_s39                    j_s40                    j_s41                    j_s42                    j_s43                    j_s44                    j_s45                    j_s46                    j_s47                    j_s48                    j_s49                    j_s50                    j_s51                    j_s52                    j_s53                    j_s54                    j_s55                     j_s7                     j_s9                       O3                     H2O2                   CH3OOH           temp                            CASH_RH                   CASH_T                 DriftAng                      H2O                  Heading                 Latitude                 Longitud                  Mix_ppm              Mix_ppm_old                    P_KAB                   press                     RHI__                     RH__                 RH_old__                      SAT                      TAS                    T_KAB                    U_28V          Uncertainty__RH          Uncertainty_ppm                  WindAng                 WindSpee                      alt                       NO                     H2CO                    CH3OH                   CH3CHO                 CH3COCH3                  CH3COOH                     ISOP                      MVK                      MEK                      CH4                       H2
      200.559337212707790        0.000000000001175        0.000000000011745        0.000006339199937        0.000053395590566        0.000209384882093        0.000013003886817        0.000140050518745        0.000014614508510        0.000080302510484        0.004112770123330        0.000001232162165        0.000012555858163        0.000000000000123        0.000046509031213        0.018432879406301        0.285804192217323        0.035795633054774        0.000071114312955        0.000745842478296        0.000013003886817        0.000000979376531        0.000000027055682        0.000000000093624        0.000000000000000        0.000048632767660        0.000141422825055        0.000001472434458        0.000000000003845        0.000072093962269        0.000015515768425        0.000000000055380        0.000000002791490        0.000000009053105        0.000000001857918        0.000000000087547        0.000000000343928        0.000000000017465        0.000000000000000        0.000000003220992        0.000000000225530        0.000000005088687        0.000000000394288        0.000000000003740        0.000000000615668        0.000000000003683        0.000000000796551        0.000000000037768        0.000000000000000        0.000797131321770        0.001951870783656        0.000000012810770        0.000001503340840        0.000000002191429        0.000000019966833        0.000000028606731        0.000000021501367        0.000000124690142        0.000000000127851        0.000000078860671        0.000000000714508        0.000000000236965      -32.565682192158889        2.200291434280426        3.245140418896010      720.678586154310550        0.000672723359879    29931.120710663523000  5045267.640551602500000  1207850.467422581300000      672.723359879481680      716.595106897174220    95280.416954080065000    32618.688864528642000       76.150991884683208       55.022339155591744       58.611360646287210    -3319.682859657583800    19129.431692613707000     3058.182007232585400      275.859967941901230        6.000000000000000       73.526483066345889    24116.130041316403000     2280.335305080399400     8597.832757082653200        0.000000000267975        0.000000000036189                      0.0                      0.0        1.561479538799911        0.550520764992090        0.201074721304723                      0.0        0.423403723467836        0.000001800000000        0.000000600000000
      200.568043922706010        0.000000000000726        0.000000000007076        0.000005843922284        0.000048106060944        0.000179762908261        0.000011199163069        0.000121725847386        0.000012606069269        0.000069184418513        0.003524634690548        0.000001096500709        0.000010957804448        0.000000000000206        0.000040136510840        0.015799538084024        0.245009595663611        0.030687897196514        0.000063797811838        0.000639837470603        0.000011199163069        0.000000880273903        0.000000045644680        0.000000000105760        0.000000000000000        0.000042187007882        0.000121483695893        0.000001285981881        0.000000000008717        0.000061970257292        0.000013424424686        0.000000000093269        0.000000004705551        0.000000015256897        0.000000003130127        0.000000000147503        0.000000000579374        0.000000000029416        0.000000000000000        0.000000005424500        0.000000000379779        0.000000008569777        0.000000000664121        0.000000000006299        0.000000001037029        0.000000000006203        0.000000001341363        0.000000000063499        0.000000000000000        0.000683943331552        0.001673853352377        0.000000021591541        0.000001385847590        0.000000003693299        0.000000033651717        0.000000041283536        0.000000036234975        0.000000205125564        0.000000000215303        0.000000094806028        0.000000000348744        0.000000000115827      -37.917150824664475        1.538434812468600        2.998116733277181     -264.319779862442890        0.000236952114663    17885.678073016286000  4990813.740797362300000  1111874.317533623400000      236.952114663448810      251.292817120217020    92489.448926745157000    29829.053354358261000       42.905086200113544       29.996095790788779       31.811541588979342    -3847.540983606557300    19342.298102940113000     2873.333739043580900      275.875575177264010        6.684833127220857       52.721343082319336    20135.425337340072000     1918.384266037575800     9200.521403425800600        0.000000000086502        0.000000000545904                      0.0                      0.0        1.301651039696018                      0.0                      0.0                      0.0        0.381869826679046        0.000001800000000        0.000000600000000
      200.569043922706010        0.000000000000726        0.000000000007076        0.000005843922284        0.000048106060944        0.000179762908261        0.000011199163069        0.000121725847386        0.000012606069269        0.000069184418513        0.003524634690548        0.000001096500709        0.000010957804448        0.000000000000206        0.000040136510840        0.015799538084024        0.245009595663611        0.030687897196514        0.000063797811838        0.000639837470603        0.000011199163069        0.000000880273903        0.000000045644680        0.000000000105760        0.000000000000000        0.000042187007882        0.000121483695893        0.000001285981881        0.000000000008717        0.000061970257292        0.000013424424686        0.000000000093269        0.000000004705551        0.000000015256897        0.000000003130127        0.000000000147503        0.000000000579374        0.000000000029416        0.000000000000000        0.000000005424500        0.000000000379779        0.000000008569777        0.000000000664121        0.000000000006299        0.000000001037029        0.000000000006203        0.000000001341363        0.000000000063499        0.000000000000000        0.000683943331552        0.001673853352377        0.000000021591541        0.000001385847590        0.000000003693299        0.000000033651717        0.000000041283536        0.000000036234975        0.000000205125564        0.000000000215303        0.000000094806028        0.000000000348744        0.000000000115827      -37.917150824664475        1.538434812468600        2.998116733277181     -264.319779862442890        0.000236952114663    17885.678073016286000  4990813.740797362300000  1111874.317533623400000      236.952114663448810      251.292817120217020    92489.448926745157000    -9829.053354358261000       42.905086200113544       29.996095790788779       31.811541588979342    -3847.540983606557300    19342.298102940113000     2873.333739043580900      275.875575177264010        6.684833127220857       52.721343082319336    20135.425337340072000     1918.384266037575800     9200.521403425800600        0.000000000086502        0.000000000545904                      0.0                      0.0        1.301651039696018                      0.0                      0.0                      0.0        0.381869826679046        0.000001800000000        0.000000600000000
      200.578320915054970        0.000000000000797        0.000000000008599        0.000007114009939        0.000057467303314        0.000208109000131        0.000012934993713        0.000142300314188        0.000014569504173        0.000079785230410        0.004075958025548        0.000001303401896        0.000012751923254        0.000000000000385        0.000046384830717        0.018285583159266        0.284297615590955        0.035600643465288        0.000075418539847        0.000741381323749        0.000012934993713        0.000001064365779        0.000000085030830        0.000000000147294        0.000000000000000        0.000048802229964        0.000140674793531        0.000001493953519        0.000000000019452        0.000071702669291        0.000015543381026        0.000000000173774        0.000000008765981        0.000000028400647        0.000000005830304        0.000000000274671        0.000000001079385        0.000000000054825        0.000000000000000        0.000000010107822        0.000000000707834        0.000000015963368        0.000000001237150        0.000000000011737        0.000000001932547        0.000000000011561        0.000000002499126        0.000000000118195        0.000000000000000        0.000791008839517        0.001936962837284        0.000000040211312        0.000001714999158        0.000000006879098        0.000000062674108        0.000000071090914        0.000000067496714        0.000000377630978        0.000000000401135        0.000000085241524        0.000000001543956        0.000000000274106      -42.028157429798611        2.450948503556527        2.735209213795520      936.785145357831310        0.000376497409540    34519.374307860453000  4986517.800687108200000  1233228.252403942200000      376.497409540465700      403.891617506631460    90418.311094736360000    27180.283236861334000      102.964153874070020       66.465782998651193       71.302323095328717    -4243.518757645286300    18721.889235860581000     2745.851531816025300      275.307614970100530        7.000000000000000       39.660793870082749    23522.672777971940000     2903.262932419716400     9816.606681719651500        0.000000000089315                      0.0                      0.0                      0.0        2.020361358510124                      0.0                      0.0                      0.0        0.399750897490727        0.000001800000000        0.000000600000000
      200.587769782471100        0.000000000000892        0.000000000006375        0.000006274245610        0.000051073248461        0.000187350892125        0.000011567610905        0.000127857810665        0.000013022690005        0.000071284680865        0.003671018129203        0.000001147070483        0.000011307988069        0.000000000000305        0.000041430876769        0.016467880876197        0.256490329955048        0.032122367469661        0.000065750046384        0.000667707749094        0.000011567610905        0.000000935676001        0.000000067195205        0.000000000116399        0.000000000000000        0.000043381928585        0.000126567893210        0.000001322775019        0.000000000012511        0.000064377104921        0.000013858755578        0.000000000138696        0.000000006952677        0.000000022548877        0.000000004624768        0.000000000218661        0.000000000861234        0.000000000043754        0.000000000000000        0.000000008050999        0.000000000565174        0.000000012716194        0.000000000986645        0.000000000009357        0.000000001541202        0.000000000009221        0.000000001990940        0.000000000094484        0.000000000000000        0.000711630850824        0.001742595913621        0.000000031881702        0.000001491111983        0.000000005450604        0.000000049680185        0.000000056690808        0.000000053475310        0.000000300191744        0.000000000319971                      0.0                      0.0                      0.0      -43.537389446041217        2.001424077181973        2.645329185249597     -180.503652851680700        0.000224085143296    16084.450322369359000  5013107.643397579000000  1107493.042407303800000      224.085143295624360      239.185731891746850    89673.953867843564000    27171.246826951978000       72.681507714670957       46.383183909224066       49.508517541003656    -4399.888347144548800    18561.965992470941000     2617.022523814694100      275.311475409836080        7.000000000000000       34.000000000000000    16243.524576955773000     1309.149511504197600     9818.793764021002100                      0.0        0.000000000049215                      0.0                      0.0        1.625349920539205                      0.0                      0.0                      0.0        0.294953599520093        0.000001800000000        0.000000600000000
      200.588769782471100        0.000000000000892        0.000000000006375        0.000006274245610        0.000051073248461        0.000187350892125        0.000011567610905        0.000127857810665        0.000013022690005        0.000071284680865        0.003671018129203        0.000001147070483        0.000011307988069        0.000000000000305        0.000041430876769        0.016467880876197        0.256490329955048        0.032122367469661        0.000065750046384        0.000667707749094        0.000011567610905        0.000000935676001        0.000000067195205        0.000000000116399        0.000000000000000        0.000043381928585        0.000126567893210        0.000001322775019        0.000000000012511        0.000064377104921        0.000013858755578        0.000000000138696        0.000000006952677        0.000000022548877        0.000000004624768        0.000000000218661        0.000000000861234        0.000000000043754        0.000000000000000        0.000000008050999        0.000000000565174        0.000000012716194        0.000000000986645        0.000000000009357        0.000000001541202        0.000000000009221        0.000000001990940        0.000000000094484        0.000000000000000        0.000711630850824        0.001742595913621        0.000000031881702        0.000001491111983        0.000000005450604        0.000000049680185        0.000000056690808        0.000000053475310        0.000000300191744        0.000000000319971                      0.0                      0.0                      0.0      -343.37389446041217        2.001424077181973        2.645329185249597     -180.503652851680700        0.000224085143296    16084.450322369359000  5013107.643397579000000  1107493.042407303800000      224.085143295624360      239.185731891746850    89673.953867843564000    27171.246826951978000       72.681507714670957       46.383183909224066       49.508517541003656    -4399.888347144548800    18561.965992470941000     2617.022523814694100      275.311475409836080        7.000000000000000       34.000000000000000    16243.524576955773000     1309.149511504197600     9818.793764021002100                      0.0        0.000000000049215                      0.0                      0.0        1.625349920539205                      0.0                      0.0                      0.0        0.294953599520093        0.000001800000000        0.000000600000000
      200.605857251915070        0.000000000002416        0.000000000006044        0.000008455316013        0.000068253514177        0.000249233912533        0.000015210811268        0.000170868891847        0.000017084830623        0.000093245584080        0.004877984541495        0.000001516543106        0.000014759326971        0.000000000000506        0.000054290946044        0.021902072867069        0.343109959279632        0.042969613836356        0.000085073384307        0.000889731359272        0.000015210811268        0.000001258593471        0.000000111216051        0.000000000150330        0.000000000000000        0.000056475009346        0.000168431142492        0.000001720976841        0.000000000017918        0.000085201621512        0.000018173426810        0.000000000232778        0.000000011560462        0.000000037507550        0.000000007688402        0.000000000365432        0.000000001445729        0.000000000073554        0.000000000000000        0.000000013472394        0.000000000948775        0.000000021257930        0.000000001652632        0.000000000015671        0.000000002582159        0.000000000015455        0.000000003331044        0.000000000158670        0.000000000000000        0.000944213859732        0.002312132923599        0.000000053003873        0.000002019578460        0.000000009047494        0.000000082533490        0.000000089962034        0.000000088777133        0.000000496841971        0.000000000537001        0.000000087766192        0.000000001425550        0.000000000477033      -45.202246103454215        2.475318263084345        2.580901842391120     1337.054793956056300        0.000308145501495    34881.477794654522000  4968205.233396839400000  1265795.210165656200000      308.145501495227620      331.125689835022400    87521.877595880549000    24731.064180643294000      111.707120784336550       69.446871953054384       74.626342013285623    -4553.333250378485900    18767.117477599579000     2432.851544692518900      275.401469193516960        7.000000000000000       31.053052947940458    24825.433137807056000     4020.566827064652900    10431.161884916821000        0.000000000948456        0.000000001210601                      0.0                      0.0        3.094220132018551        0.560381632955213                      0.0                      0.0        0.390684455047880        0.000001800000000        0.000000600000000
