# Supplementary material for: The atmospheric chemistry box model CAABA/MECCA-3.0
Source: Copernicus journal article supplement (doi:10.5194/gmd-4-373-2011), 2011-05-06
Supplement: Supplementary file 9 [file gmd-4-373-2011-supplement.zip › caaba_3.0/multirun/input/README]

- If there are only *.txt files in this directory but no *.nc files,
  then you have to create them with xtxt2nc:

  xtxt2nc *.txt

- Note that the files example_debug.* contain invalid data for
  temperature and pressure. They are only used for testing.
