# Supplementary material for: The atmospheric chemistry box model CAABA/MECCA-3.0
Source: Copernicus journal article supplement (doi:10.5194/gmd-4-373-2011), 2011-05-06
Supplement: Supplementary file 18 [file gmd-4-373-2011-supplement.zip]

# The Chemical Mechanism of MECCA

KPP version: 2.2.1\_rs5

MECCA version: 3.0

Date: April 15, 2011.

Selected reactions:  
"iAra"

Number of aerosol phases: 1

Number of species in selected mechanism:

Gas phase: 197

Aqueous phase: 89

All species: 286

Number of reactions in selected mechanism:

Gas phase (Gnm): 378

Aqueous phase (Anm): 147

Henry (Hnm): 93

Photolysis (Jnm): 116

Heterogeneous (HETnm): 21

Equilibria (EQnm): 68

Isotope exchange (DGMnm): 0

Dummy (Dnm): 1

All equations: 826

This document is part of the electronic supplement to our article  
"The atmospheric chemistry box model CAABA/MECCA-3.0"  
in Geosci. Model Dev. (2011), available at:  
<http://www.geosci-model-dev.net>

Table 1: Gas phase reactions

| #      | labels | reaction                                | rate coefficient                                      | reference                                             |
|--------|--------|-----------------------------------------|-------------------------------------------------------|-------------------------------------------------------|
| G1000  | StTrG  | $O_2 + O(^1D) \rightarrow O(^3P) + O_2$ | $3.3E-11*EXP(55./temp)$                               | Sander et al. (2006)                                  |
| G1001  | StTrG  | $O_2 + O(^3P) \rightarrow O_3$          | $6.E-34*((temp/300.)**(-2.4))*cair$                   | Sander et al. (2006)                                  |
| G1002  | StG    | $O_3 + O(^1D) \rightarrow 2 O_2$        | 1.2E-10                                               | Sander et al. (2006)*                                 |
| G1003  | StG    | $O_3 + O(^3P) \rightarrow 2 O_2$        | $8.E-12*EXP(-2060./temp)$                             | Sander et al. (2006)                                  |
| G2100  | StTrG  | $H + O_2 \rightarrow HO_2$              | $k\_3rd(temp, cair, 4.4E-32, 1.3, 4.7E-11, 0.2, 0.6)$ | Sander et al. (2006)                                  |
| G2101  | StG    | $H + O_3 \rightarrow OH + O_2$          | $1.4E-10*EXP(-470./temp)$                             | Sander et al. (2006)                                  |
| G2102  | StG    | $H_2 + O(^1D) \rightarrow H + OH$       | 1.1E-10                                               | Sander et al. (2006)                                  |
| G2103  | StG    | $OH + O(^3P) \rightarrow H + O_2$       | $2.2E-11*EXP(120./temp)$                              | Sander et al. (2006)                                  |
| G2104  | StTrG  | $OH + O_3 \rightarrow HO_2 + O_2$       | $1.7E-12*EXP(-940./temp)$                             | Sander et al. (2006)                                  |
| G2105  | StTrG  | $OH + H_2 \rightarrow H_2O + H$         | $2.8E-12*EXP(-1800./temp)$                            | Sander et al. (2006)                                  |
| G2106  | StG    | $HO_2 + O(^3P) \rightarrow OH + O_2$    | $3.E-11*EXP(200./temp)$                               | Sander et al. (2006)                                  |
| G2107  | StTrG  | $HO_2 + O_3 \rightarrow OH + 2 O_2$     | $1.E-14*EXP(-490./temp)$                              | Sander et al. (2006)                                  |
| G2108a | StG    | $HO_2 + H \rightarrow 2 OH$             | 7.2E-11                                               | Sander et al. (2006)                                  |
| G2108b | StG    | $HO_2 + H \rightarrow H_2 + O_2$        | 6.9E-12                                               | Sander et al. (2006)                                  |
| G2108c | StG    | $HO_2 + H \rightarrow O(^3P) + H_2O$    | 1.6E-12                                               | Sander et al. (2006)                                  |
| G2109  | StTrG  | $HO_2 + OH \rightarrow H_2O + O_2$      | $4.8E-11*EXP(250./temp)$                              | Sander et al. (2006)                                  |
| G2110  | StTrG  | $HO_2 + HO_2 \rightarrow H_2O_2 + O_2$  | k_HO2_HO2                                             | Christensen et al. (2002), Kircher and Sander (1984)* |
| G2111  | StTrG  | $H_2O + O(^1D) \rightarrow 2 OH$        | $1.63E-10*EXP(60./temp)$                              | Sander et al. (2006)                                  |
| G2112  | StTrG  | $H_2O_2 + OH \rightarrow H_2O + HO_2$   | 1.8E-12                                               | Sander et al. (2006)                                  |
| G3100  | StGN   | $N + O_2 \rightarrow NO + O(^3P)$       | $1.5E-11*EXP(-3600./temp)$                            | Sander et al. (2006)                                  |
| G3101  | StTrG  | $N_2 + O(^1D) \rightarrow O(^3P) + N_2$ | $2.15E-11*EXP(110./temp)$                             | Sander et al. (2006)                                  |
| G3102a | StGN   | $N_2O + O(^1D) \rightarrow 2 NO$        | $6.7E-11*EXP(20./temp)$                               | Sander et al. (2006)                                  |
| G3102b | StGN   | $N_2O + O(^1D) \rightarrow N_2 + O_2$   | $4.7E-11*EXP(20./temp)$                               | Sander et al. (2006)                                  |
| G3103  | StTrGN | $NO + O_3 \rightarrow NO_2 + O_2$       | $3.E-12*EXP(-1500./temp)$                             | Sander et al. (2006)                                  |
| G3104  | StGN   | $NO + N \rightarrow O(^3P) + N_2$       | $2.1E-11*EXP(100./temp)$                              | Sander et al. (2006)                                  |
| G3105  | StGN   | $NO_2 + O(^3P) \rightarrow NO + O_2$    | $5.1E-12*EXP(210./temp)$                              | Sander et al. (2006)                                  |
| G3106  | StTrGN | $NO_2 + O_3 \rightarrow NO_3 + O_2$     | $1.2E-13*EXP(-2450./temp)$                            | Sander et al. (2006)                                  |
| G3107  | StGN   | $NO_2 + N \rightarrow N_2O + O(^3P)$    | $5.8E-12*EXP(220./temp)$                              | Sander et al. (2006)                                  |
| G3108  | StTrGN | $NO_3 + NO \rightarrow 2 NO_2$          | $1.5E-11*EXP(170./temp)$                              | Sander et al. (2006)                                  |
| G3109  | StTrGN | $NO_3 + NO_2 \rightarrow N_2O_5$        | k_N03_NO2                                             | Sander et al. (2006)*                                 |
| G3110  | StTrGN | $N_2O_5 \rightarrow NO_2 + NO_3$        | $k\_N03\_NO2/(2.7E-27*EXP(11000./temp))$              | Sander et al. (2006)*                                 |

Table 1: Gas phase reactions (... continued)

| #     | labels | reaction                                                                                                                                    | rate coefficient                                                                          | reference                 |
|-------|--------|---------------------------------------------------------------------------------------------------------------------------------------------|-------------------------------------------------------------------------------------------|---------------------------|
| G3200 | TrGN   | $\text{NO} + \text{OH} \rightarrow \text{HONO}$                                                                                             | $k_{\text{3rd}}(\text{temp}, \text{cair}, 7.0\text{E-}31, 2.6, 3.6\text{E-}11, 0.1, 0.6)$ | Sander et al. (2006)      |
| G3201 | StTrGN | $\text{NO} + \text{HO}_2 \rightarrow \text{NO}_2 + \text{OH}$                                                                               | $3.5\text{E-}12 * \text{EXP}(250./\text{temp})$                                           | Sander et al. (2006)      |
| G3202 | StTrGN | $\text{NO}_2 + \text{OH} \rightarrow \text{HNO}_3$                                                                                          | $k_{\text{3rd}}(\text{temp}, \text{cair}, 1.8\text{E-}30, 3.0, 2.8\text{E-}11, 0., 0.6)$  | Sander et al. (2006)      |
| G3203 | StTrGN | $\text{NO}_2 + \text{HO}_2 \rightarrow \text{HNO}_4$                                                                                        | $k_{\text{NO2\_HO2}}$                                                                     | Sander et al. (2006)*     |
| G3204 | TrGN   | $\text{NO}_3 + \text{HO}_2 \rightarrow \text{NO}_2 + \text{OH} + \text{O}_2$                                                                | $3.5\text{E-}12$                                                                          | Sander et al. (2006)      |
| G3205 | TrGN   | $\text{HONO} + \text{OH} \rightarrow \text{NO}_2 + \text{H}_2\text{O}$                                                                      | $1.8\text{E-}11 * \text{EXP}(-390./\text{temp})$                                          | Sander et al. (2006)      |
| G3206 | StTrGN | $\text{HNO}_3 + \text{OH} \rightarrow \text{H}_2\text{O} + \text{NO}_3$                                                                     | $k_{\text{HNO3\_OH}}$                                                                     | Sander et al. (2006)*     |
| G3207 | StTrGN | $\text{HNO}_4 \rightarrow \text{NO}_2 + \text{HO}_2$                                                                                        | $k_{\text{NO2\_HO2}} / (2.1\text{E-}27 * \text{EXP}(10900./\text{temp}))$                 | Sander et al. (2006)*     |
| G3208 | StTrGN | $\text{HNO}_4 + \text{OH} \rightarrow \text{NO}_2 + \text{H}_2\text{O}$                                                                     | $1.3\text{E-}12 * \text{EXP}(380./\text{temp})$                                           | Sander et al. (2006)      |
| G3209 | TrGN   | $\text{NH}_3 + \text{OH} \rightarrow \text{NH}_2 + \text{H}_2\text{O}$                                                                      | $1.7\text{E-}12 * \text{EXP}(-710./\text{temp})$                                          | Kohlmann and Poppe (1999) |
| G3210 | TrGN   | $\text{NH}_2 + \text{O}_3 \rightarrow \text{NH}_2\text{O} + \text{O}_2$                                                                     | $4.3\text{E-}12 * \text{EXP}(-930./\text{temp})$                                          | Kohlmann and Poppe (1999) |
| G3211 | TrGN   | $\text{NH}_2 + \text{HO}_2 \rightarrow \text{NH}_2\text{O} + \text{OH}$                                                                     | $4.8\text{E-}07 * \text{EXP}(-628./\text{temp}) * \text{temp}^{**}(-1.32)$                | Kohlmann and Poppe (1999) |
| G3212 | TrGN   | $\text{NH}_2 + \text{HO}_2 \rightarrow \text{HNO} + \text{H}_2\text{O}$                                                                     | $9.4\text{E-}09 * \text{EXP}(-356./\text{temp}) * \text{temp}^{**}(-1.12)$                | Kohlmann and Poppe (1999) |
| G3213 | TrGN   | $\text{NH}_2 + \text{NO} \rightarrow \text{HO}_2 + \text{OH} + \text{N}_2$                                                                  | $1.92\text{E-}12 * ((\text{temp}/298.)^{**}(-1.5))$                                       | Kohlmann and Poppe (1999) |
| G3214 | TrGN   | $\text{NH}_2 + \text{NO} \rightarrow \text{N}_2 + \text{H}_2\text{O}$                                                                       | $1.41\text{E-}11 * ((\text{temp}/298.)^{**}(-1.5))$                                       | Kohlmann and Poppe (1999) |
| G3215 | TrGN   | $\text{NH}_2 + \text{NO}_2 \rightarrow \text{N}_2\text{O} + \text{H}_2\text{O}$                                                             | $1.2\text{E-}11 * ((\text{temp}/298.)^{**}(-2.0))$                                        | Kohlmann and Poppe (1999) |
| G3216 | TrGN   | $\text{NH}_2 + \text{NO}_2 \rightarrow \text{NH}_2\text{O} + \text{NO}$                                                                     | $0.8\text{E-}11 * ((\text{temp}/298.)^{**}(-2.0))$                                        | Kohlmann and Poppe (1999) |
| G3217 | TrGN   | $\text{NH}_2\text{O} + \text{O}_3 \rightarrow \text{NH}_2 + \text{O}_2$                                                                     | $1.2\text{E-}14$                                                                          | Kohlmann and Poppe (1999) |
| G3218 | TrGN   | $\text{NH}_2\text{O} \rightarrow \text{NHOH}$                                                                                               | $1.3\text{E}3$                                                                            | Kohlmann and Poppe (1999) |
| G3219 | TrGN   | $\text{HNO} + \text{OH} \rightarrow \text{NO} + \text{H}_2\text{O}$                                                                         | $8.0\text{E-}11 * \text{EXP}(-500./\text{temp})$                                          | Kohlmann and Poppe (1999) |
| G3220 | TrGN   | $\text{HNO} + \text{NHOH} \rightarrow \text{NH}_2\text{OH} + \text{NO}$                                                                     | $1.66\text{E-}12 * \text{EXP}(-1500./\text{temp})$                                        | Kohlmann and Poppe (1999) |
| G3221 | TrGN   | $\text{HNO} + \text{NO}_2 \rightarrow \text{HONO} + \text{NO}$                                                                              | $1.0\text{E-}12 * \text{EXP}(-1000./\text{temp})$                                         | Kohlmann and Poppe (1999) |
| G3222 | TrGN   | $\text{NHOH} + \text{OH} \rightarrow \text{HNO} + \text{H}_2\text{O}$                                                                       | $1.66\text{E-}12$                                                                         | Kohlmann and Poppe (1999) |
| G3223 | TrGN   | $\text{NH}_2\text{OH} + \text{OH} \rightarrow \text{NHOH} + \text{H}_2\text{O}$                                                             | $4.13\text{E-}11 * \text{EXP}(-2138./\text{temp})$                                        | Kohlmann and Poppe (1999) |
| G3224 | TrGN   | $\text{HNO} + \text{O}_2 \rightarrow \text{HO}_2 + \text{NO}$                                                                               | $3.65\text{E-}14 * \text{EXP}(-4600./\text{temp})$                                        | Kohlmann and Poppe (1999) |
| G4100 | StG    | $\text{CH}_4 + \text{O}(^1\text{D}) \rightarrow .75 \text{CH}_3\text{O}_2 + .75 \text{OH} + .25 \text{HCHO} + .4 \text{H} + .05 \text{H}_2$ | $1.5\text{E-}10$                                                                          | Sander et al. (2006)      |
| G4101 | StTrG  | $\text{CH}_4 + \text{OH} \rightarrow \text{CH}_3\text{O}_2 + \text{H}_2\text{O}$                                                            | $1.85\text{E-}20 * \text{EXP}(2.82 * \log(\text{temp}) - 987./\text{temp})$               | Atkinson (2003)           |
| G4102 | TrG    | $\text{CH}_3\text{OH} + \text{OH} \rightarrow \text{HCHO} + \text{HO}_2$                                                                    | $2.9\text{E-}12 * \text{EXP}(-345./\text{temp})$                                          | Sander et al. (2006)      |
| G4103 | StTrG  | $\text{CH}_3\text{O}_2 + \text{HO}_2 \rightarrow \text{CH}_3\text{OOH} + \text{O}_2$                                                        | $4.1\text{E-}13 * \text{EXP}(750./\text{temp})$                                           | Sander et al. (2006)*     |
| G4104 | StTrGN | $\text{CH}_3\text{O}_2 + \text{NO} \rightarrow \text{HCHO} + \text{NO}_2 + \text{HO}_2$                                                     | $2.8\text{E-}12 * \text{EXP}(300./\text{temp})$                                           | Sander et al. (2006)      |
| G4105 | TrGN   | $\text{CH}_3\text{O}_2 + \text{NO}_3 \rightarrow \text{HCHO} + \text{HO}_2 + \text{NO}_2$                                                   | $1.3\text{E-}12$                                                                          | Atkinson et al. (2006)    |

Table 1: Gas phase reactions (... continued)

| #      | labels | reaction                                                                                                                                                                                  | rate coefficient                                                                                       | reference                  |
|--------|--------|-------------------------------------------------------------------------------------------------------------------------------------------------------------------------------------------|--------------------------------------------------------------------------------------------------------|----------------------------|
| G4106a | StTrG  | $\text{CH}_3\text{O}_2 \rightarrow \text{HCHO} + \text{HO}_2$                                                                                                                             | $2.*\text{R02}*9.5\text{E}-14*\text{EXP}(390./\text{temp})/(1.+1./26.2*\text{EXP}(1130./\text{temp}))$ | Sander et al. (2006)       |
| G4106b | StTrG  | $\text{CH}_3\text{O}_2 \rightarrow .5 \text{HCHO} + .5 \text{CH}_3\text{OH} + .5 \text{O}_2$                                                                                              | $2.*\text{R02}*9.5\text{E}-14*\text{EXP}(390./\text{temp})/(1.+26.2*\text{EXP}(-1130./\text{temp}))$   | Sander et al. (2006)       |
| G4107  | StTrG  | $\text{CH}_3\text{OOH} + \text{OH} \rightarrow .7 \text{CH}_3\text{O}_2 + .3 \text{HCHO} + .3 \text{OH} + \text{H}_2\text{O}$                                                             | k_CH300H_OH                                                                                            | Sander et al. (2006)*      |
| G4108  | StTrG  | $\text{HCHO} + \text{OH} \rightarrow \text{CO} + \text{H}_2\text{O} + \text{HO}_2$                                                                                                        | $9.52\text{E}-18*\text{EXP}(2.03*\log(\text{temp})+636./\text{temp})$                                  | Sivakumaran et al. (2003)  |
| G4109  | TrGN   | $\text{HCHO} + \text{NO}_3 \rightarrow \text{HNO}_3 + \text{CO} + \text{HO}_2$                                                                                                            | $3.4\text{E}-13*\text{EXP}(-1900./\text{temp})$                                                        | Sander et al. (2006)*      |
| G4110  | StTrG  | $\text{CO} + \text{OH} \rightarrow \text{H} + \text{CO}_2$                                                                                                                                | $(1.57\text{E}-13+\text{cair}*3.54\text{E}-33)$                                                        | McCabe et al. (2001)       |
| G4111  | TrG    | $\text{HCOOH} + \text{OH} \rightarrow \text{CO}_2 + \text{HO}_2 + \text{H}_2\text{O}$                                                                                                     | 4.0E-13                                                                                                | Sander et al. (2006)       |
| G4200  | TrGC   | $\text{C}_2\text{H}_6 + \text{OH} \rightarrow \text{C}_2\text{H}_5\text{O}_2 + \text{H}_2\text{O}$                                                                                        | $1.49\text{E}-17*\text{temp}*\text{temp}*\text{EXP}(-499./\text{temp})$                                | Atkinson (2003)            |
| G4201  | TrGC   | $\text{C}_2\text{H}_4 + \text{O}_3 \rightarrow \text{HCHO} + .63 \text{CO} + .13 \text{HO}_2 + 0.23125 \text{HCOOH} + 0.13875 \text{HCHO} + 0.13875 \text{H}_2\text{O}_2 + .13 \text{OH}$ | $1.2\text{E}-14*\text{EXP}(-2630./\text{temp})$                                                        | Sander et al. (2006)*      |
| G4202  | TrGC   | $\text{C}_2\text{H}_4 + \text{OH} \rightarrow \text{HOCH}_2\text{CH}_2\text{O}_2$                                                                                                         | k_3rd(temp, cair, 1.0E-28, 4.5, 8.8E-12, 0.85, 0.6)                                                    | Sander et al. (2006)       |
| G4203  | TrGC   | $\text{C}_2\text{H}_5\text{O}_2 + \text{HO}_2 \rightarrow \text{C}_2\text{H}_5\text{OOH}$                                                                                                 | $7.5\text{E}-13*\text{EXP}(700./\text{temp})$                                                          | Sander et al. (2006)       |
| G4204  | TrGNC  | $\text{C}_2\text{H}_5\text{O}_2 + \text{NO} \rightarrow \text{CH}_3\text{CHO} + \text{HO}_2 + \text{NO}_2$                                                                                | $2.6\text{E}-12*\text{EXP}(365./\text{temp})$                                                          | Sander et al. (2006)       |
| G4205  | TrGNC  | $\text{C}_2\text{H}_5\text{O}_2 + \text{NO}_3 \rightarrow \text{CH}_3\text{CHO} + \text{HO}_2 + \text{NO}_2$                                                                              | 2.3E-12                                                                                                | Atkinson et al. (1999)     |
| G4206  | TrGC   | $\text{C}_2\text{H}_5\text{O}_2 \rightarrow .98 \text{CH}_3\text{CHO} + .38 \text{HO}_2 + .02 \text{HOCH}_2\text{CH}_2\text{O}_2$                                                         | $3.1\text{E}-13*\text{R02}$                                                                            | Rickard and Pascoe (2009)* |
| G4207  | TrGC   | $\text{C}_2\text{H}_5\text{OOH} + \text{OH} \rightarrow .43 \text{C}_2\text{H}_5\text{O}_2 + .43 \text{H}_2\text{O} + .57 \text{CH}_3\text{CHO} + .57 \text{OH}$                          | $0.6*k_{\text{CH300H\_OH}} + 8.01\text{E}-12$                                                          | see note                   |
| G4208  | TrGC   | $\text{CH}_3\text{CHO} + \text{OH} \rightarrow \text{CH}_3\text{C(O)OO} + \text{H}_2\text{O}$                                                                                             | $4.4\text{E}-12*\text{EXP}(365./\text{temp})$                                                          | Atkinson et al. (2006)     |
| G4209  | TrGNC  | $\text{CH}_3\text{CHO} + \text{NO}_3 \rightarrow \text{CH}_3\text{C(O)OO} + \text{HNO}_3$                                                                                                 | KN03AL                                                                                                 | Sander et al. (2006)       |
| G4210  | TrGC   | $\text{CH}_3\text{COOH} + \text{OH} \rightarrow \text{CH}_3\text{O}_2 + \text{CO}_2 + \text{H}_2\text{O}$                                                                                 | $4.2\text{E}-14*\text{EXP}(855./\text{temp})$                                                          | Atkinson et al. (2006)     |
| G4211a | TrGC   | $\text{CH}_3\text{C(O)OO} + \text{HO}_2 \rightarrow \text{CH}_3\text{C(O)OOH}$                                                                                                            | $4.3\text{E}-13*\text{EXP}(1040./\text{temp})/(1.+1./37.*\text{EXP}(660./\text{temp}))$                | Tyndall et al. (2001)      |
| G4211b | TrGC   | $\text{CH}_3\text{C(O)OO} + \text{HO}_2 \rightarrow \text{CH}_3\text{COOH} + \text{O}_3$                                                                                                  | $4.3\text{E}-13*\text{EXP}(1040./\text{temp})/(1.+37.*\text{EXP}(-660./\text{temp}))$                  | Tyndall et al. (2001)      |
| G4212  | TrGNC  | $\text{CH}_3\text{C(O)OO} + \text{NO} \rightarrow \text{CH}_3\text{O}_2 + \text{CO}_2 + \text{NO}_2$                                                                                      | $8.1\text{E}-12*\text{EXP}(270./\text{temp})$                                                          | Tyndall et al. (2001)      |
| G4213  | TrGNC  | $\text{CH}_3\text{C(O)OO} + \text{NO}_2 \rightarrow \text{PAN}$                                                                                                                           | k_CH3C03_NO2                                                                                           | Sander et al. (2006)       |
| G4214  | TrGNC  | $\text{CH}_3\text{C(O)OO} + \text{NO}_3 \rightarrow \text{CH}_3\text{O}_2 + \text{NO}_2 + \text{CO}_2$                                                                                    | 4.E-12                                                                                                 | Canosa-Mas et al. (1996)   |
| G4217  | TrGC   | $\text{CH}_3\text{C(O)OO} \rightarrow .7 \text{CH}_3\text{O}_2 + .7 \text{CO}_2 + .3 \text{CH}_3\text{COOH}$                                                                              | $1.00\text{E}-11*\text{R02}$                                                                           | Rickard and Pascoe (2009)  |
| G4218  | TrGC   | $\text{CH}_3\text{C(O)OOH} + \text{OH} \rightarrow \text{CH}_3\text{C(O)OO} + \text{H}_2\text{O}$                                                                                         | $0.6*k_{\text{CH300H\_OH}}$                                                                            | Rickard and Pascoe (2009)* |
| G4220  | TrGNC  | $\text{PAN} + \text{OH} \rightarrow \text{HCHO} + \text{CO} + \text{NO}_2 + \text{H}_2\text{O}$                                                                                           | $9.50\text{E}-13*\text{EXP}(-650./\text{temp})$                                                        | Rickard and Pascoe (2009)  |
| G4221  | TrGNC  | $\text{PAN} \rightarrow \text{CH}_3\text{C(O)OO} + \text{NO}_2$                                                                                                                           | k_PAN_M                                                                                                | Sander et al. (2006)*      |

Table 1: Gas phase reactions (... continued)

| #      | labels | reaction                                                                                                                                                          | rate coefficient                                                     | reference                  |
|--------|--------|-------------------------------------------------------------------------------------------------------------------------------------------------------------------|----------------------------------------------------------------------|----------------------------|
| G4222  | TrGC   | $C_2H_2 + OH \rightarrow 0.636 \text{ GLYOX} + 0.636 \text{ OH} + 0.364 \text{ HCOOH} + 0.364 \text{ CO} + 0.364 \text{ HO}_2$                                    | $k_{3rd}(\text{temp}, \text{cair}, 5.5e-30, 0.0, 8.3e-13, -2., 0.6)$ | Sander et al. (2006)       |
| G4223  | TrGC   | $HOCH_2CHO + OH \rightarrow .8 \text{ HOCH}_2\text{CO}_3 + .2 \text{ GLYOX} + .2 \text{ HO}_2 + \text{H}_2\text{O}$                                               | $1.00E-11$                                                           | Rickard and Pascoe (2009)  |
| G4224  | TrGNC  | $HOCH_2CHO + NO_3 \rightarrow HOCH_2CO_3 + HNO_3$                                                                                                                 | KN03AL                                                               | Rickard and Pascoe (2009)  |
| G4225  | TrGC   | $HOCH_2CO_3 \rightarrow .7 \text{ HCHO} + .7 \text{ CO}_2 + .7 \text{ HO}_2 + .3 \text{ HOCH}_2\text{CO}_2\text{H}$                                               | $1.00E-11 * R02$                                                     | Rickard and Pascoe (2009)  |
| G4226  | TrGC   | $HOCH_2CO_3 + HO_2 \rightarrow .71 \text{ HOCH}_2\text{CO}_3\text{H} + .29 \text{ HOCH}_2\text{CO}_2\text{H} + .29 \text{ O}_3$                                   | KAPH02                                                               | Rickard and Pascoe (2009)  |
| G4227  | TrGNC  | $HOCH_2CO_3 + NO \rightarrow NO_2 + HO_2 + HCHO + CO_2$                                                                                                           | KAPNO                                                                | Rickard and Pascoe (2009)  |
| G4228  | TrGNC  | $HOCH_2CO_3 + NO_2 \rightarrow PHAN$                                                                                                                              | k_CH3C03_NO2                                                         | Rickard and Pascoe (2009)  |
| G4229  | TrGNC  | $HOCH_2CO_3 + NO_3 \rightarrow NO_2 + HO_2 + HCHO + CO_2$                                                                                                         | KR02N03*1.60                                                         | Rickard and Pascoe (2009)  |
| G4230  | TrGC   | $HOCH_2CO_2H + OH \rightarrow HCHO + HO_2 + CO_2 + H_2O$                                                                                                          | $2.73E-12$                                                           | Rickard and Pascoe (2009)  |
| G4231  | TrGC   | $HOCH_2CO_3H + OH \rightarrow HOCH_2CO_3 + H_2O$                                                                                                                  | $6.19E-12$                                                           | Rickard and Pascoe (2009)  |
| G4232  | TrGNC  | $PHAN \rightarrow HOCH_2CO_3 + NO_2$                                                                                                                              | k_PAN_M                                                              | Rickard and Pascoe (2009)  |
| G4233  | TrGNC  | $PHAN + OH \rightarrow HCHO + CO + NO_2 + H_2O$                                                                                                                   | $1.12E-12$                                                           | Rickard and Pascoe (2009)  |
| G4234  | TrGC   | $GLYOX + OH \rightarrow 1.2 \text{ CO} + .6 \text{ HO}_2 + .4 \text{ HCOCO}_3 + \text{H}_2\text{O}$                                                               | $1.14E-11$                                                           | Rickard and Pascoe (2009)  |
| G4235  | TrGNC  | $GLYOX + NO_3 \rightarrow 1.2 \text{ CO} + .6 \text{ HO}_2 + .4 \text{ HCOCO}_3 + \text{HNO}_3$                                                                   | KN03AL                                                               | Rickard and Pascoe (2009)  |
| G4236  | TrGC   | $HCOCO_3 \rightarrow .7 \text{ CO} + .7 \text{ HO}_2 + .7 \text{ CO}_2 + .3 \text{ HCOCO}_2\text{H}$                                                              | $1.00E-11 * R02$                                                     | Rickard and Pascoe (2009)  |
| G4237  | TrGC   | $HCOCO_3 + HO_2 \rightarrow .71 \text{ HCOCO}_3\text{H} + .29 \text{ HCOCO}_2\text{H} + .29 \text{ O}_3$                                                          | KAPH02                                                               | Rickard and Pascoe (2009)  |
| G4238  | TrGNC  | $HCOCO_3 + NO \rightarrow HO_2 + CO + NO_2 + CO_2$                                                                                                                | KAPNO                                                                | Rickard and Pascoe (2009)  |
| G4239  | TrGNC  | $HCOCO_3 + NO_3 \rightarrow HO_2 + CO + NO_2 + CO_2$                                                                                                              | KR02N03*1.60                                                         | Rickard and Pascoe (2009)  |
| G4240  | TrGC   | $HCOCO_2H + OH \rightarrow CO + HO_2 + CO_2 + H_2O$                                                                                                               | $1.23E-11$                                                           | Rickard and Pascoe (2009)  |
| G4241  | TrGC   | $HCOCO_3H + OH \rightarrow HCOCO_3 + H_2O$                                                                                                                        | $1.58E-11$                                                           | Rickard and Pascoe (2009)  |
| G4242  | TrGC   | $HOCH_2CH_2O_2 \rightarrow .6 \text{ HOCH}_2\text{CH}_2\text{O} + .2 \text{ HOCH}_2\text{CHO} + .2 \text{ ETHGLY}$                                                | $2.00E-12 * R02$                                                     | Rickard and Pascoe (2009)  |
| G4243  | TrGNC  | $HOCH_2CH_2O_2 + NO \rightarrow .24875 \text{ HO}_2 + .4975 \text{ HCHO} + .74625 \text{ HOCH}_2\text{CH}_2\text{O} + .995 \text{ NO}_2 + .005 \text{ ETHOHNO}_3$ | KR02NO                                                               | Rickard and Pascoe (2009)* |
| G4244  | TrGC   | $HOCH_2CH_2O_2 + HO_2 \rightarrow \text{HYETHO}_2\text{H}$                                                                                                        | $2.00E-13 * \text{EXP}(1250./\text{temp})$                           | Rickard and Pascoe (2009)  |
| G4245  | TrGNC  | $\text{ETHOHNO}_3 + OH \rightarrow HOCH_2CHO + NO_2 + H_2O$                                                                                                       | $8.40E-13$                                                           | Rickard and Pascoe (2009)  |
| G4246a | TrGC   | $\text{HYETHO}_2\text{H} + OH \rightarrow HOCH_2CH_2O_2 + H_2O$                                                                                                   | $0.6 * k_{\text{CH300H\_OH}}$                                        | Rickard and Pascoe (2009)* |
| G4246b | TrGC   | $\text{HYETHO}_2\text{H} + OH \rightarrow HOCH_2CHO + OH + H_2O$                                                                                                  | $1.38E-11$                                                           | Rickard and Pascoe (2009)  |
| G4247a | TrGC   | $HOCH_2CH_2O \rightarrow HO_2 + HOCH_2CHO$                                                                                                                        | $6.00E-14 * \text{EXP}(-550./\text{temp}) * C(\text{ind}_02)$        | Rickard and Pascoe (2009)  |

Table 1: Gas phase reactions (... continued)

| #      | labels | reaction                                                                                                                                                                                                                                                                                              | rate coefficient                                                                         | reference                  |
|--------|--------|-------------------------------------------------------------------------------------------------------------------------------------------------------------------------------------------------------------------------------------------------------------------------------------------------------|------------------------------------------------------------------------------------------|----------------------------|
| G4247b | TrGC   | $\text{HOCH}_2\text{CH}_2\text{O} \rightarrow \text{HO}_2 + \text{HCHO} + \text{HCHO}$                                                                                                                                                                                                                | $9.50\text{E}13 \cdot \text{EXP}(-5988./\text{temp})$                                    | Rickard and Pascoe (2009)  |
| G4248  | TrGC   | $\text{ETHGLY} + \text{OH} \rightarrow \text{HOCH}_2\text{CHO} + \text{HO}_2 + \text{H}_2\text{O}$                                                                                                                                                                                                    | $7.70\text{E}-12$                                                                        | Rickard and Pascoe (2009)  |
| G4300  | TrGC   | $\text{C}_3\text{H}_8 + \text{OH} \rightarrow .736 \text{ iC}_3\text{H}_7\text{O}_2 + .264 \text{ C}_2\text{H}_5\text{O}_2 + .264 \text{ CO}_2 + .264 \text{ HO}_2 + \text{H}_2\text{O}$                                                                                                              | $1.55\text{E}-17 \cdot \text{temp} \cdot \text{temp} \cdot \text{EXP}(-61./\text{temp})$ | Rickard and Pascoe (2009)* |
| G4301  | TrGC   | $\text{C}_3\text{H}_6 + \text{O}_3 \rightarrow .28 \text{ CH}_3\text{O}_2 + .1 \text{ CH}_4 + .075 \text{ CH}_3\text{COOH} + .56 \text{ CO} + .075 \text{ HCOOH} + .09 \text{ H}_2\text{O}_2 + .28 \text{ HO}_2 + .2 \text{ CO}_2 + .545 \text{ CH}_3\text{CHO} + .545 \text{ HCHO} + .36 \text{ OH}$ | $6.5\text{E}-15 \cdot \text{EXP}(-1900./\text{temp})$                                    | Sander et al. (2006)*      |
| G4302  | TrGC   | $\text{C}_3\text{H}_6 + \text{OH} \rightarrow \text{HYPROPO2}$                                                                                                                                                                                                                                        | $\text{k\_3rd}(\text{temp}, \text{cair}, 8.\text{E}-27, 3.5, 3.\text{E}-11, 0., 0.5)$    | Atkinson et al. (1999)     |
| G4303  | TrGNC  | $\text{C}_3\text{H}_6 + \text{NO}_3 \rightarrow \text{PRONO3BO2}$                                                                                                                                                                                                                                     | $4.6\text{E}-13 \cdot \text{EXP}(-1155./\text{temp})$                                    | Atkinson et al. (1999)     |
| G4304  | TrGC   | $\text{iC}_3\text{H}_7\text{O}_2 + \text{HO}_2 \rightarrow \text{iC}_3\text{H}_7\text{OOH}$                                                                                                                                                                                                           | $1.9\text{E}-13 \cdot \text{EXP}(1300./\text{temp})$                                     | Atkinson (1997)*           |
| G4305  | TrGNC  | $\text{iC}_3\text{H}_7\text{O}_2 + \text{NO} \rightarrow .96 \text{ CH}_3\text{COCH}_3 + .96 \text{ HO}_2 + .96 \text{ NO}_2 + .04 \text{ iC}_3\text{H}_7\text{ONO}_2$                                                                                                                                | $2.7\text{E}-12 \cdot \text{EXP}(360./\text{temp})$                                      | Atkinson et al. (1999)     |
| G4306  | TrGC   | $\text{iC}_3\text{H}_7\text{O}_2 \rightarrow \text{CH}_3\text{COCH}_3 + .8 \text{ HO}_2$                                                                                                                                                                                                              | $4.\text{E}-14 \cdot \text{R02}$                                                         | Rickard and Pascoe (2009)* |
| G4307  | TrGC   | $\text{iC}_3\text{H}_7\text{OOH} + \text{OH} \rightarrow .27 \text{ iC}_3\text{H}_7\text{O}_2 + .73 \text{ CH}_3\text{COCH}_3 + .73 \text{ OH} + \text{H}_2\text{O}$                                                                                                                                  | $1.66\text{E}-11 + 0.6 \cdot \text{k\_CH300H\_OH}$                                       | Rickard and Pascoe (2009)* |
| G4311  | TrGC   | $\text{CH}_3\text{COCH}_3 + \text{OH} \rightarrow \text{CH}_3\text{COCH}_2\text{O}_2 + \text{H}_2\text{O}$                                                                                                                                                                                            | $(1.33\text{E}-13 + 3.82\text{E}-11 \cdot \text{EXP}(-2000./\text{temp}))$               | Sander et al. (2006)       |
| G4312  | TrGC   | $\text{CH}_3\text{COCH}_2\text{O}_2 + \text{HO}_2 \rightarrow \text{CH}_3\text{COCH}_2\text{O}_2\text{H}$                                                                                                                                                                                             | $8.6\text{E}-13 \cdot \text{EXP}(700./\text{temp})$                                      | Tyndall et al. (2001)      |
| G4313  | TrGNC  | $\text{CH}_3\text{COCH}_2\text{O}_2 + \text{NO} \rightarrow \text{CH}_3\text{C}(\text{O})\text{OO} + \text{HCHO} + \text{NO}_2$                                                                                                                                                                       | $2.9\text{E}-12 \cdot \text{EXP}(300./\text{temp})$                                      | Sander et al. (2006)       |
| G4314  | TrGC   | $\text{CH}_3\text{COCH}_2\text{O}_2 \rightarrow .6 \text{ CH}_3\text{C}(\text{O})\text{OO} + .6 \text{ HCHO} + .2 \text{ MGLYOX} + .2 \text{ CH}_3\text{COCH}_2\text{OH}$                                                                                                                             | $7.5\text{E}-13 \cdot \text{EXP}(500./\text{temp}) \cdot 2 \cdot \text{R02}$             | Tyndall et al. (2001)      |
| G4315a | TrGC   | $\text{CH}_3\text{COCH}_2\text{O}_2\text{H} + \text{OH} \rightarrow \text{CH}_3\text{COCH}_2\text{O}_2 + \text{H}_2\text{O}$                                                                                                                                                                          | $0.6 \cdot \text{k\_CH300H\_OH}$                                                         | see note                   |
| G4315b | TrGC   | $\text{CH}_3\text{COCH}_2\text{O}_2\text{H} + \text{OH} \rightarrow \text{MGLYOX} + \text{OH} + \text{H}_2\text{O}$                                                                                                                                                                                   | $8.39\text{E}-12$                                                                        | Rickard and Pascoe (2009)  |
| G4316  | TrGC   | $\text{CH}_3\text{COCH}_2\text{OH} + \text{OH} \rightarrow \text{MGLYOX} + \text{HO}_2 + \text{H}_2\text{O}$                                                                                                                                                                                          | $3.\text{E}-12$                                                                          | Atkinson et al. (1999)     |
| G4317  | TrGC   | $\text{MGLYOX} + \text{OH} \rightarrow \text{CH}_3\text{C}(\text{O})\text{OO} + \text{CO}$                                                                                                                                                                                                            | $8.4\text{E}-13 \cdot \text{EXP}(830./\text{temp})$                                      | Tyndall et al. (1995)      |
| G4320  | TrGNC  | $\text{iC}_3\text{H}_7\text{ONO}_2 + \text{OH} \rightarrow \text{CH}_3\text{COCH}_3 + \text{NO}_2$                                                                                                                                                                                                    | $6.2\text{E}-13 \cdot \text{EXP}(-230./\text{temp})$                                     | Atkinson et al. (1999)     |
| G4321  | TrGNC  | $\text{CH}_3\text{COCH}_2\text{O}_2 + \text{NO}_3 \rightarrow \text{CH}_3\text{C}(\text{O})\text{OO} + \text{HCHO} + \text{NO}_2$                                                                                                                                                                     | $\text{KR02N03}$                                                                         | Rickard and Pascoe (2009)  |
| G4322  | TrGC   | $\text{HYPROPO2} \rightarrow \text{CH}_3\text{CHO} + \text{HCHO} + \text{HO}_2$                                                                                                                                                                                                                       | $8.80\text{E}-13 \cdot \text{R02}$                                                       | Rickard and Pascoe (2009)  |
| G4323  | TrGC   | $\text{HYPROPO2} + \text{HO}_2 \rightarrow \text{HYPROPO2H}$                                                                                                                                                                                                                                          | $\text{KR02HO2} \cdot 0.520$                                                             | Rickard and Pascoe (2009)  |
| G4324  | TrGNC  | $\text{HYPROPO2} + \text{NO} \rightarrow \text{CH}_3\text{CHO} + \text{HCHO} + \text{HO}_2 + \text{NO}_2$                                                                                                                                                                                             | $\text{KR02N0}$                                                                          | Rickard and Pascoe (2009)  |
| G4325  | TrGNC  | $\text{HYPROPO2} + \text{NO}_3 \rightarrow \text{CH}_3\text{CHO} + \text{HCHO} + \text{HO}_2 + \text{NO}_2$                                                                                                                                                                                           | $\text{KR02N03}$                                                                         | Rickard and Pascoe (2009)  |
| G4326a | TrGC   | $\text{HYPROPO2H} + \text{OH} \rightarrow \text{HYPROPO2}$                                                                                                                                                                                                                                            | $1.90\text{E}-12 \cdot \text{EXP}(190./\text{temp})$                                     | Rickard and Pascoe (2009)  |
| G4326b | TrGC   | $\text{HYPROPO2H} + \text{OH} \rightarrow \text{CH}_3\text{COCH}_2\text{OH} + \text{OH}$                                                                                                                                                                                                              | $2.44\text{E}-11$                                                                        | Rickard and Pascoe (2009)  |
| G4327  | TrGNC  | $\text{PRONO3BO2} + \text{HO}_2 \rightarrow \text{PR2O2HNO3}$                                                                                                                                                                                                                                         | $\text{KR02HO2} \cdot 0.520$                                                             | Rickard and Pascoe (2009)  |
| G4328  | TrGNC  | $\text{PRONO3BO2} + \text{NO} \rightarrow \text{NOA} + \text{HO}_2 + \text{NO}_2$                                                                                                                                                                                                                     | $\text{KR02N0}$                                                                          | Rickard and Pascoe (2009)  |

Table 1: Gas phase reactions (... continued)

| #      | labels | reaction                                                                                                                                                                                                                                      | rate coefficient                  | reference                  |
|--------|--------|-----------------------------------------------------------------------------------------------------------------------------------------------------------------------------------------------------------------------------------------------|-----------------------------------|----------------------------|
| G4329  | TrGNC  | PRONO3BO2 + NO <sub>3</sub> → NOA + HO <sub>2</sub> + NO <sub>2</sub>                                                                                                                                                                         | KR02NO3                           | Rickard and Pascoe (2009)  |
| G4330a | TrGNC  | PR2O2HNO3 + OH → PRONO3BO2                                                                                                                                                                                                                    | 1.90E-12*EXP(190./temp)           | Rickard and Pascoe (2009)  |
| G4330b | TrGNC  | PR2O2HNO3 + OH → NOA + OH                                                                                                                                                                                                                     | 3.47E-12                          | Rickard and Pascoe (2009)  |
| G4331  | TrGNC  | MGLYOX + NO <sub>3</sub> → CH <sub>3</sub> C(O)OO + CO + HNO <sub>3</sub>                                                                                                                                                                     | KN03AL*2.4                        | Rickard and Pascoe (2009)  |
| G4332  | TrGNC  | NOA + OH → MGLYOX + NO <sub>2</sub>                                                                                                                                                                                                           | 1.30E-13                          | Rickard and Pascoe (2009)  |
| G4333  | TrGC   | HOCH2COCHO + OH → HOCH <sub>2</sub> CO <sub>3</sub> + CO                                                                                                                                                                                      | 1.44E-11                          | Rickard and Pascoe (2009)  |
| G4334  | TrGNC  | HOCH2COCHO + NO <sub>3</sub> → HOCH <sub>2</sub> CO <sub>3</sub> + CO + HNO <sub>3</sub>                                                                                                                                                      | KN03AL*2.4                        | Rickard and Pascoe (2009)  |
| G4335  | TrGC   | HOCH2COCO2H + OH → HOCH <sub>2</sub> CO <sub>3</sub> + CO <sub>2</sub>                                                                                                                                                                        | 2.89E-12                          | Rickard and Pascoe (2009)  |
| G4400  | TrGC   | nC <sub>4</sub> H <sub>10</sub> + OH → LC <sub>4</sub> H <sub>9</sub> O <sub>2</sub> + H <sub>2</sub> O                                                                                                                                       | 1.81E-17*temp*temp*EXP(114./temp) | Atkinson (2003)*           |
| G4401  | TrGC   | LC <sub>4</sub> H <sub>9</sub> O <sub>2</sub> → 0.254 CO <sub>2</sub> + 0.5552 MEK + 0.5552 HO <sub>2</sub> + 0.3178 CH <sub>3</sub> CHO + 0.4448 C <sub>2</sub> H <sub>5</sub> O <sub>2</sub>                                                | 2.5E-13*RO2                       | Rickard and Pascoe (2009)* |
| G4402  | TrGC   | LC <sub>4</sub> H <sub>9</sub> O <sub>2</sub> + HO <sub>2</sub> → LC <sub>4</sub> H <sub>9</sub> OOH                                                                                                                                          | KR02HO2*0.625                     | Rickard and Pascoe (2009)  |
| G4403  | TrGNC  | LC <sub>4</sub> H <sub>9</sub> O <sub>2</sub> + NO → 0.9172 NO <sub>2</sub> + 0.233 CO <sub>2</sub> + 0.5092 MEK + 0.5092 HO <sub>2</sub> + 0.2915 CH <sub>3</sub> CHO + 0.408 C <sub>2</sub> H <sub>5</sub> O <sub>2</sub> + 0.0828 LC4H9NO3 | KR02NO                            | Rickard and Pascoe (2009)* |
| G4404  | TrGC   | LC <sub>4</sub> H <sub>9</sub> OOH + OH → 0.2285796 LC <sub>4</sub> H <sub>9</sub> O <sub>2</sub> + 0.7117253 MEK + 0.1193902 CO <sub>2</sub> + 0.0596951 C <sub>2</sub> H <sub>5</sub> O <sub>2</sub> + 0.7714204 OH + H <sub>2</sub> O      | 2.636E-11                         | Rickard and Pascoe (2009)* |
| G4405  | TrGC   | MVK + O <sub>3</sub> → 0.28 CH <sub>3</sub> C(O)OO + 0.56 CO + 0.225 LCARBON + 0.075 HCOOH + 0.09 H <sub>2</sub> O <sub>2</sub> + 0.28 HO <sub>2</sub> + 0.1 CO <sub>2</sub> + 0.1 CH <sub>3</sub> CHO + 0.645 HCHO + 0.36 OH + 0.545 MGLYOX  | 7.51E-16*EXP(-1521./temp)         | Rickard and Pascoe (2009)  |
| G4406  | TrGC   | MVK + OH → LHMVKABO2                                                                                                                                                                                                                          | 4.13E-12*EXP(452./temp)           | Rickard and Pascoe (2009)  |
| G4413  | TrGC   | MEK + OH → LMEKO2 + H <sub>2</sub> O                                                                                                                                                                                                          | 3.24E-18*temp*temp*EXP(414./temp) | Rickard and Pascoe (2009)* |
| G4414  | TrGC   | LMEKO2 + HO <sub>2</sub> → LMEKOOH                                                                                                                                                                                                            | KR02HO2*0.625                     | Rickard and Pascoe (2009)  |
| G4415  | TrGNC  | LMEKO2 + NO → 0.538 HCHO + 0.538 CO <sub>2</sub> + 0.459 HOCH <sub>2</sub> CH <sub>2</sub> O <sub>2</sub> + 0.079 C <sub>2</sub> H <sub>5</sub> O <sub>2</sub> + 0.462 CH <sub>3</sub> C(O)OO + 0.462 CH <sub>3</sub> CHO + NO <sub>2</sub>   | KR02NO                            | Rickard and Pascoe (2009)* |
| G4416  | TrGC   | LMEKOOH + OH → 0.40851 CH <sub>3</sub> COCH <sub>2</sub> O <sub>2</sub> + 0.350196 BIACET + 0.807212 OH + 0.048506 C <sub>2</sub> H <sub>5</sub> O <sub>2</sub> + 0.505522 CO <sub>2</sub> + 0.192788 LMEKO2 + H <sub>2</sub> O               | 3.786E-11                         | Rickard and Pascoe (2009)* |
| G4417  | TrGNC  | LC4H9NO3 + OH → 0.91423 MEK + 0.08577 C <sub>2</sub> H <sub>5</sub> O <sub>2</sub> + 0.17154 CO <sub>2</sub> + NO <sub>2</sub> + H <sub>2</sub> O                                                                                             | 9.598E-13                         | Rickard and Pascoe (2009)* |
| G4418  | TrGNC  | MPAN + OH → CH <sub>3</sub> COCH <sub>2</sub> OH + CO + NO <sub>2</sub>                                                                                                                                                                       | 3.2E-11                           | Orlando et al. (2002)      |
| G4419  | TrGNC  | MPAN → MACO3 + NO <sub>2</sub>                                                                                                                                                                                                                | k_PAN_M                           | see note                   |

Table 1: Gas phase reactions (... continued)

| #     | labels | reaction                                                                                                                                                                                                                         | rate coefficient                | reference                  |
|-------|--------|----------------------------------------------------------------------------------------------------------------------------------------------------------------------------------------------------------------------------------|---------------------------------|----------------------------|
| G4420 | TrGC   | LMEKO2 $\rightarrow$ 0.538 HCHO + 0.538 CO <sub>2</sub> + 0.459 HOCH <sub>2</sub> CH <sub>2</sub> O <sub>2</sub> + 0.079 C <sub>2</sub> H <sub>5</sub> O <sub>2</sub> + 0.462 CH <sub>3</sub> C(O)OO + 0.462 CH <sub>3</sub> CHO | 1.483E-12*R02                   | Rickard and Pascoe (2009)* |
| G4421 | TrGC   | MACR + OH $\rightarrow$ .57 MACO3 + .43 MACRO2                                                                                                                                                                                   | 1.86E-11*EXP(175./temp)         | Rickard and Pascoe (2009)  |
| G4422 | TrGC   | MACR + O <sub>3</sub> $\rightarrow$ .59 MGLYOX + .41 CH <sub>3</sub> C(O)OO + .03375 HCOOH + .55625 HCHO + .82 CO + .12375 H <sub>2</sub> O <sub>2</sub> + .41 HO <sub>2</sub> + .82 OH                                          | 1.36E-15*EXP(-2112./temp)       | Rickard and Pascoe (2009)  |
| G4423 | TrGNC  | MACR + NO <sub>3</sub> $\rightarrow$ MACO3 + HNO <sub>3</sub>                                                                                                                                                                    | KN03AL*2.0                      | Rickard and Pascoe (2009)  |
| G4424 | TrGC   | MACO3 $\rightarrow$ .7 CH <sub>3</sub> C(O)OO + .7 HCHO + .7 CO <sub>2</sub> + .3 MACO2H                                                                                                                                         | 1.00E-11*R02                    | Rickard and Pascoe (2009)  |
| G4425 | TrGC   | MACO3 + HO <sub>2</sub> $\rightarrow$ .71 MACO3H + .29 MACO2H + .29 O <sub>3</sub>                                                                                                                                               | KAPH02                          | Rickard and Pascoe (2009)  |
| G4426 | TrGNC  | MACO3 + NO $\rightarrow$ CH <sub>3</sub> C(O)OO + HCHO + NO <sub>2</sub> + CO <sub>2</sub>                                                                                                                                       | 8.70E-12*EXP(290./temp)         | Rickard and Pascoe (2009)  |
| G4427 | TrGNC  | MACO3 + NO <sub>2</sub> $\rightarrow$ MPAN                                                                                                                                                                                       | k_CH3C03_N02                    | Rickard and Pascoe (2009)  |
| G4428 | TrGNC  | MACO3 + NO <sub>3</sub> $\rightarrow$ CH <sub>3</sub> C(O)OO + HCHO + NO <sub>2</sub> + CO <sub>2</sub>                                                                                                                          | KR02N03*1.60                    | Rickard and Pascoe (2009)  |
| G4429 | TrGC   | MACRO2 $\rightarrow$ .7 CH <sub>3</sub> COCH <sub>2</sub> OH + .7 HCHO + .7 HO <sub>2</sub> + .3 MACROH                                                                                                                          | 9.20E-14*R02                    | Rickard and Pascoe (2009)  |
| G4430 | TrGC   | MACRO2 + HO <sub>2</sub> $\rightarrow$ MACROOH                                                                                                                                                                                   | KR02H02*0.625                   | Rickard and Pascoe (2009)  |
| G4431 | TrGNC  | MACRO2 + NO $\rightarrow$ CH <sub>3</sub> COCH <sub>2</sub> OH + HCHO + HO <sub>2</sub> + NO <sub>2</sub>                                                                                                                        | KR02N0                          | Rickard and Pascoe (2009)  |
| G4432 | TrGNC  | MACRO2 + NO <sub>3</sub> $\rightarrow$ CH <sub>3</sub> COCH <sub>2</sub> OH + HCHO + HO <sub>2</sub> + NO <sub>2</sub>                                                                                                           | KR02N03                         | Rickard and Pascoe (2009)  |
| G4433 | TrGC   | MACROOH + OH $\rightarrow$ MACRO2                                                                                                                                                                                                | 2.82E-11                        | Rickard and Pascoe (2009)  |
| G4434 | TrGC   | MACROH + OH $\rightarrow$ CH <sub>3</sub> COCH <sub>2</sub> OH + HCHO + HO <sub>2</sub>                                                                                                                                          | 2.46E-11                        | Rickard and Pascoe (2009)  |
| G4435 | TrGC   | MACO2H + OH $\rightarrow$ CH <sub>3</sub> C(O)OO + HCHO + CO <sub>2</sub>                                                                                                                                                        | 1.51E-11                        | Rickard and Pascoe (2009)  |
| G4436 | TrGC   | MACO3H + OH $\rightarrow$ MACO3                                                                                                                                                                                                  | 1.87E-11                        | Rickard and Pascoe (2009)  |
| G4437 | TrGC   | LHMKABO2 $\rightarrow$ 0.06 CO2H3CHO + 0.18 HO <sub>2</sub> + 0.18 HCHO + 0.18 MGLYOX + 0.42 CH <sub>3</sub> C(O)OO + .42 HOCH <sub>2</sub> CHO + .2 HO12CO3C4 + .14 BIACETOH                                                    | (.3*2.00E-12 + .7*8.80E-13)*R02 | Rickard and Pascoe (2009)* |
| G4438 | TrGC   | LHMKABO2 + HO <sub>2</sub> $\rightarrow$ LHMKABOOH                                                                                                                                                                               | KR02H02*0.625                   | Rickard and Pascoe (2009)  |
| G4439 | TrGNC  | LHMKABO2 + NO $\rightarrow$ .3 MGLYOX + .7 HOCH <sub>2</sub> CHO + .7 CH <sub>3</sub> C(O)OO + .3 HCHO + .3 HO <sub>2</sub> + NO <sub>2</sub>                                                                                    | KR02N0                          | Rickard and Pascoe (2009)* |
| G4440 | TrGNC  | LHMKABO2 + NO <sub>3</sub> $\rightarrow$ .3 MGLYOX + .7 HOCH <sub>2</sub> CHO + .7 CH <sub>3</sub> C(O)OO + .3 HCHO + .3 HO <sub>2</sub> + NO <sub>2</sub>                                                                       | KR02N03                         | Rickard and Pascoe (2009)* |



Table 1: Gas phase reactions (... continued)

| #     | labels | reaction                                                                                                                                                                                                                                                                                                                                               | rate coefficient                | reference                  |
|-------|--------|--------------------------------------------------------------------------------------------------------------------------------------------------------------------------------------------------------------------------------------------------------------------------------------------------------------------------------------------------------|---------------------------------|----------------------------|
| G4441 | TrGC   | LHMVKABOOH + OH → .3 CO2H3CHO + .7 BIACETOH + OH                                                                                                                                                                                                                                                                                                       | 4.496E-11                       | Rickard and Pascoe (2009)* |
| G4442 | TrGC   | MVKOH + OH → LMVKOHABO2                                                                                                                                                                                                                                                                                                                                | 4.60E-12*EXP(452./temp)         | Rickard and Pascoe (2009)  |
| G4443 | TrGC   | MVKOH + O <sub>3</sub> → 0.56 CO + 0.545 HOCH2COCHO + 0.075 HOCH2COCO2H + 0.075 HCOOH + 0.09 H <sub>2</sub> O <sub>2</sub> + 0.28 HOCH <sub>2</sub> CO <sub>3</sub> + 0.28 HO <sub>2</sub> + 0.2 CO <sub>2</sub> + 0.545 HCHO + 0.36 OH + 0.1 HOCH <sub>2</sub> CHO                                                                                    | 7.51E-16*EXP(-1521./temp)       | Rickard and Pascoe (2009)  |
| G4444 | TrGC   | LMVKOHABO2 → .7 HOCH <sub>2</sub> CHO + .7 HOCH <sub>2</sub> CO <sub>3</sub> + .3 HOCH2COCHO + .3 HCHO + .3 HO <sub>2</sub>                                                                                                                                                                                                                            | (0.3*2.00E-12+0.7*8.80E-13)*R02 | Rickard and Pascoe (2009)* |
| G4445 | TrGC   | LMVKOHABO2 + HO <sub>2</sub> → LMVKOHABOOH                                                                                                                                                                                                                                                                                                             | KR02H02*0.625                   | Rickard and Pascoe (2009)  |
| G4446 | TrGNC  | LMVKOHABO2 + NO → .3 HOCH2COCHO + .3 HCHO + .3 HO <sub>2</sub> + .7 HOCH <sub>2</sub> CHO + .7 HOCH <sub>2</sub> CO <sub>3</sub> + NO <sub>2</sub>                                                                                                                                                                                                     | KR02N0                          | Rickard and Pascoe (2009)* |
| G4447 | TrGNC  | LMVKOHABO2 + NO <sub>3</sub> → .3 HOCH2COCHO + .3 HCHO + .3 HO <sub>2</sub> + .7 HOCH <sub>2</sub> CHO + .7 HOCH <sub>2</sub> CO <sub>3</sub> + NO <sub>2</sub>                                                                                                                                                                                        | KR02N03                         | Rickard and Pascoe (2009)* |
| G4448 | TrGC   | LMVKOHABOOH + OH → .7 HO12CO3C4 + .3 CO2H3CHO + OH                                                                                                                                                                                                                                                                                                     | 5.98E-11                        | Rickard and Pascoe (2009)* |
| G4449 | TrGC   | CO2H3CHO + OH → CO2H3CO3                                                                                                                                                                                                                                                                                                                               | 2.45E-11                        | Rickard and Pascoe (2009)  |
| G4450 | TrGNC  | CO2H3CHO + NO <sub>3</sub> → CO2H3CO3 + HNO <sub>3</sub>                                                                                                                                                                                                                                                                                               | KN03AL*4.0                      | Rickard and Pascoe (2009)  |
| G4451 | TrGC   | CO2H3CO3 → MGLYOX + HO <sub>2</sub> + CO <sub>2</sub>                                                                                                                                                                                                                                                                                                  | 1.00E-11*R02                    | Rickard and Pascoe (2009)  |
| G4452 | TrGC   | CO2H3CO3 + HO <sub>2</sub> → CO2H3CO3H                                                                                                                                                                                                                                                                                                                 | KAPH02                          | Rickard and Pascoe (2009)  |
| G4453 | TrGNC  | CO2H3CO3 + NO → MGLYOX + HO <sub>2</sub> + NO <sub>2</sub> + CO <sub>2</sub>                                                                                                                                                                                                                                                                           | KAPNO                           | Rickard and Pascoe (2009)  |
| G4454 | TrGNC  | CO2H3CO3 + NO <sub>3</sub> → MGLYOX + HO <sub>2</sub> + NO <sub>2</sub> + CO <sub>2</sub>                                                                                                                                                                                                                                                              | KR02N03*1.60                    | Rickard and Pascoe (2009)  |
| G4455 | TrGC   | CO2H3CO3H + OH → CO2H3CO3                                                                                                                                                                                                                                                                                                                              | 7.34E-12                        | Rickard and Pascoe (2009)  |
| G4456 | TrGC   | HO12CO3C4 + OH → BIACETOH + HO <sub>2</sub>                                                                                                                                                                                                                                                                                                            | 1.88E-11                        | Rickard and Pascoe (2009)  |
| G4500 | TrGC   | C <sub>5</sub> H <sub>8</sub> + O <sub>3</sub> → .051 CH <sub>3</sub> O <sub>2</sub> + .1575 CH <sub>3</sub> C(O)OO + .054 LHMVKABO2 + .522 CO + .06875 HCOOH + .11 H <sub>2</sub> O <sub>2</sub> + .32475 MACR + .1275 C <sub>3</sub> H <sub>6</sub> + .2625 HO <sub>2</sub> + .255 CO <sub>2</sub> + .74975 HCHO + .04125 MACO2H + .27 OH + .244 MVK | 7.86E-15*EXP(-1913./temp)       | Rickard and Pascoe (2009)  |
| G4501 | TrGC   | C <sub>5</sub> H <sub>8</sub> + OH → .25 LISOPACO2 + .491 ISOPBO2 + .259 ISOPDO2                                                                                                                                                                                                                                                                       | 2.54E-11*EXP(410./temp)         | Atkinson (1997)            |
| G4509 | TrGNC  | C <sub>5</sub> H <sub>8</sub> + NO <sub>3</sub> → NISOPO2                                                                                                                                                                                                                                                                                              | 3.03E-12*EXP(-446./temp)        | Rickard and Pascoe (2009)  |
| G4510 | TrGC   | LISOPACO2 → .9 LHC4ACCHO + .8 HO <sub>2</sub> + .1 ISOPAHO                                                                                                                                                                                                                                                                                             | 2.4E-12*R02                     | Rickard and Pascoe (2009)  |
| G4511 | TrGC   | LISOPACO2 + HO <sub>2</sub> → LISOPACOOH                                                                                                                                                                                                                                                                                                               | 0.706*KR02H02                   | Rickard and Pascoe (2009)  |
| G4512 | TrGNC  | LISOPACO2 + NO → .892 LHC4ACCHO + .892 HO <sub>2</sub> + .892 NO <sub>2</sub> + .108 LISOPACNO3                                                                                                                                                                                                                                                        | KR02N0                          | Rickard and Pascoe (2009)  |

Table 1: Gas phase reactions (... continued)

| #     | labels | reaction                                                                                                                                                                                                      | rate coefficient | reference                 |
|-------|--------|---------------------------------------------------------------------------------------------------------------------------------------------------------------------------------------------------------------|------------------|---------------------------|
| G4513 | TrGNC  | LISOPACO2 + NO <sub>3</sub> → LHC4ACCHO + HO <sub>2</sub> + NO <sub>2</sub>                                                                                                                                   | KR02N03          | Rickard and Pascoe (2009) |
| G4514 | TrGC   | LISOPACOOH + OH → LHC4ACCHO + OH                                                                                                                                                                              | 1.07E-10         | Rickard and Pascoe (2009) |
| G4515 | TrGC   | ISOPAOH + OH → LHC4ACCHO + HO <sub>2</sub>                                                                                                                                                                    | 9.30E-11         | Rickard and Pascoe (2009) |
| G4516 | TrGNC  | LISOPACNO3 + OH → LHC4ACCHO + NO <sub>2</sub>                                                                                                                                                                 | 8.91E-11         | Rickard and Pascoe (2009) |
| G4517 | TrGC   | ISOPBO2 → .6 MVK + .2 MVKOH + .6 HCHO + .6 HO <sub>2</sub><br>+ .2 CH <sub>3</sub> O <sub>2</sub> + .2 ISOPBOH                                                                                                | 8.E-13*R02       | Rickard and Pascoe (2009) |
| G4518 | TrGC   | ISOPBO2 + HO <sub>2</sub> → ISOPBOOH                                                                                                                                                                          | 0.706*KR02H02    | Rickard and Pascoe (2009) |
| G4519 | TrGNC  | ISOPBO2 + NO → .696 MVK + .232 MVKOH + .696<br>HCHO + .696 HO <sub>2</sub> + .232 CH <sub>3</sub> O <sub>2</sub> + .928 NO <sub>2</sub> + .072<br>ISOPBNO3                                                    | KR02N0           | Rickard and Pascoe (2009) |
| G4520 | TrGNC  | ISOPBO2 + NO <sub>3</sub> → .75 MVK + .25 MVKOH + .75 HCHO<br>+ .75 HO <sub>2</sub> + .25 CH <sub>3</sub> O <sub>2</sub> + NO <sub>2</sub>                                                                    | KR02N03          | Rickard and Pascoe (2009) |
| G4521 | TrGC   | ISOPBOOH + OH → ISOPBO2                                                                                                                                                                                       | 4.2E-11          | Rickard and Pascoe (2009) |
| G4522 | TrGC   | ISOPBOH + OH → .75 MVK + .25 MVKOH + .75 HCHO<br>+ .75 HO <sub>2</sub> + .25 CH <sub>3</sub> O <sub>2</sub>                                                                                                   | 3.85E-11         | Rickard and Pascoe (2009) |
| G4523 | TrGNC  | ISOPBNO3 + OH → MVK + HCHO + NO <sub>2</sub>                                                                                                                                                                  | 3.55E-11         | Rickard and Pascoe (2009) |
| G4524 | TrGC   | ISOPDO2 → .8 MACR + .8 HCHO + .8 HO <sub>2</sub> + .1 HCOC5<br>+ .1 ISOPDOH                                                                                                                                   | 2.9E-12*R02      | Rickard and Pascoe (2009) |
| G4525 | TrGC   | ISOPDO2 + HO <sub>2</sub> → ISOPDOOH                                                                                                                                                                          | 0.706*KR02H02    | Rickard and Pascoe (2009) |
| G4526 | TrGNC  | ISOPDO2 + NO → .855 MACR + .855 HCHO + .855 HO <sub>2</sub><br>+ .855 NO <sub>2</sub> + .145 ISOPDNO3                                                                                                         | KR02N0           | Rickard and Pascoe (2009) |
| G4527 | TrGNC  | ISOPDO2 + NO <sub>3</sub> → MACR + HCHO + HO <sub>2</sub> + NO <sub>2</sub>                                                                                                                                   | KR02N03          | Rickard and Pascoe (2009) |
| G4528 | TrGC   | ISOPDOOH + OH → HCOC5 + OH                                                                                                                                                                                    | 1.07E-10         | Rickard and Pascoe (2009) |
| G4529 | TrGC   | ISOPDOH + OH → HCOC5 + HO <sub>2</sub>                                                                                                                                                                        | 7.38E-11         | Rickard and Pascoe (2009) |
| G4530 | TrGNC  | ISOPDNO3 + OH → HCOC5 + NO <sub>2</sub>                                                                                                                                                                       | 6.1E-11          | Rickard and Pascoe (2009) |
| G4531 | TrGNC  | NISOPO2 → .8 NC4CHO + .6 HO <sub>2</sub> + .2 LISOPACNO3                                                                                                                                                      | 1.3E-12*R02      | Rickard and Pascoe (2009) |
| G4532 | TrGNC  | NISOPO2 + HO <sub>2</sub> → NISOPOOH                                                                                                                                                                          | .706*KR02H02     | Rickard and Pascoe (2009) |
| G4533 | TrGNC  | NISOPO2 + NO → NC4CHO + HO <sub>2</sub> + NO <sub>2</sub>                                                                                                                                                     | KR02N0           | Rickard and Pascoe (2009) |
| G4534 | TrGNC  | NISOPO2 + NO <sub>3</sub> → NC4CHO + HO <sub>2</sub> + NO <sub>2</sub>                                                                                                                                        | KR02N03          | Rickard and Pascoe (2009) |
| G4535 | TrGNC  | NISOPOOH + OH → NC4CHO + OH                                                                                                                                                                                   | 1.03E-10         | Rickard and Pascoe (2009) |
| G4536 | TrGNC  | NC4CHO + OH → LNISO3                                                                                                                                                                                          | 4.16E-11         | Rickard and Pascoe (2009) |
| G4537 | TrGNC  | NC4CHO + O <sub>3</sub> → .445 NO <sub>2</sub> + .89 CO + .075625 H <sub>2</sub> O <sub>2</sub><br>+ .034375 HCOCO <sub>2</sub> H + .555 NOA + .445 HO <sub>2</sub> + .520625<br>GLYOX + .89 OH + .445 MGLYOX | 2.40E-17         | Rickard and Pascoe (2009) |
| G4538 | TrGNC  | NC4CHO + NO <sub>3</sub> → LNISO3 + HNO <sub>3</sub>                                                                                                                                                          | KN03AL*4.25      | Rickard and Pascoe (2009) |

Table 1: Gas phase reactions (... continued)

| #     | labels | reaction                                                                                                                                                                                                                                                                                                                                                                                | rate coefficient                            | reference                 |
|-------|--------|-----------------------------------------------------------------------------------------------------------------------------------------------------------------------------------------------------------------------------------------------------------------------------------------------------------------------------------------------------------------------------------------|---------------------------------------------|---------------------------|
| G4539 | TrGNC  | $\text{LNISO3} + \text{HO}_2 \rightarrow \text{LNISOOH}$                                                                                                                                                                                                                                                                                                                                | $.5*.706*\text{KR02H02} + .5*\text{KAPH02}$ | Rickard and Pascoe (2009) |
| G4540 | TrGNC  | $\text{LNISO3} + \text{NO} \rightarrow \text{NOA} + .5 \text{GLYOX} + .5 \text{CO} + \text{HO}_2 + \text{NO}_2 + .5 \text{CO}_2$                                                                                                                                                                                                                                                        | $.5*\text{KAPNO} + .5*\text{KR02NO}$        | Rickard and Pascoe (2009) |
| G4541 | TrGNC  | $\text{LNISO3} + \text{NO}_3 \rightarrow \text{NOA} + .5 \text{GLYOX} + .5 \text{CO} + \text{HO}_2 + \text{NO}_2 + .5 \text{CO}_2$                                                                                                                                                                                                                                                      | $1.3*\text{KR02NO3}$                        | Rickard and Pascoe (2009) |
| G4542 | TrGNC  | $\text{LNISOOH} + \text{OH} \rightarrow \text{LNISO3}$                                                                                                                                                                                                                                                                                                                                  | $2.65\text{E-11}$                           | Rickard and Pascoe (2009) |
| G4543 | TrGC   | $\text{LHC4ACCHO} + \text{OH} \rightarrow .52 \text{LC578O2} + .48 \text{LHC4ACCO3}$                                                                                                                                                                                                                                                                                                    | $4.52\text{E-11}$                           | Rickard and Pascoe (2009) |
| G4544 | TrGC   | $\text{LHC4ACCHO} + \text{O}_3 \rightarrow .2225 \text{CH}_3\text{C(O)OO} + .89 \text{CO} + .0171875 \text{HOCH}_2\text{CO}_2\text{H} + .075625 \text{H}_2\text{O}_2 + .0171875 \text{HCOCO}_2\text{H} + .2775 \text{CH}_3\text{COCH}_2\text{OH} + .6675 \text{HO}_2 + .2603125 \text{GLYOX} + .2225 \text{HCHO} + .89 \text{OH} + .2603125 \text{HOCH}_2\text{CHO} + .5 \text{MGLYOX}$ | $2.40\text{E-17}$                           | Rickard and Pascoe (2009) |
| G4545 | TrGNC  | $\text{LHC4ACCHO} + \text{NO}_3 \rightarrow \text{LHC4ACCO3} + \text{HNO}_3$                                                                                                                                                                                                                                                                                                            | $\text{KN03AL}*4.25$                        | Rickard and Pascoe (2009) |
| G4546 | TrGC   | $\text{LC578O2} \rightarrow .5 \text{CH}_3\text{COCH}_2\text{OH} + .5 \text{MGLYOX} + .5 \text{GLYOX} + .5 \text{HOCH}_2\text{CHO} + \text{HO}_2$                                                                                                                                                                                                                                       | $9.20\text{E-14}*R02$                       | Rickard and Pascoe (2009) |
| G4547 | TrGC   | $\text{LC578O2} + \text{HO}_2 \rightarrow \text{LC578OOH}$                                                                                                                                                                                                                                                                                                                              | $\text{KR02H02}*0.706$                      | Rickard and Pascoe (2009) |
| G4548 | TrGNC  | $\text{LC578O2} + \text{NO} \rightarrow .5 \text{CH}_3\text{COCH}_2\text{OH} + .5 \text{MGLYOX} + .5 \text{GLYOX} + .5 \text{HOCH}_2\text{CHO} + \text{HO}_2 + \text{NO}_2$                                                                                                                                                                                                             | $\text{KR02NO}$                             | Rickard and Pascoe (2009) |
| G4549 | TrGNC  | $\text{LC578O2} + \text{NO}_3 \rightarrow .5 \text{CH}_3\text{COCH}_2\text{OH} + .5 \text{MGLYOX} + .5 \text{GLYOX} + .5 \text{HOCH}_2\text{CHO} + \text{HO}_2 + \text{NO}_2$                                                                                                                                                                                                           | $\text{KR02NO3}$                            | Rickard and Pascoe (2009) |
| G4550 | TrGC   | $\text{LC578OOH} + \text{OH} \rightarrow \text{LC578O2}$                                                                                                                                                                                                                                                                                                                                | $3.16\text{E-11}$                           | Rickard and Pascoe (2009) |
| G4551 | TrGC   | $\text{LHC4ACCO3} \rightarrow .3 \text{LHC4ACCO2H} + .35 \text{CH}_3\text{COCH}_2\text{OH} + .35 \text{HOCH}_2\text{CHO} + .35 \text{CH}_3\text{C(O)OO} + .35 \text{CO} + .35 \text{HO}_2 + .7 \text{CO}_2$                                                                                                                                                                             | $1.00\text{E-11}*R02$                       | Rickard and Pascoe (2009) |
| G4552 | TrGC   | $\text{LHC4ACCO3} + \text{HO}_2 \rightarrow .71 \text{LHC4ACCO3H} + .29 \text{LHC4ACCO2H} + .29 \text{O}_3$                                                                                                                                                                                                                                                                             | $\text{KAPH02}$                             | Rickard and Pascoe (2009) |
| G4553 | TrGNC  | $\text{LHC4ACCO3} + \text{NO} \rightarrow .5 \text{CH}_3\text{COCH}_2\text{OH} + .5 \text{HOCH}_2\text{CHO} + .5 \text{CH}_3\text{C(O)OO} + .5 \text{CO} + .5 \text{HO}_2 + \text{NO}_2 + \text{CO}_2$                                                                                                                                                                                  | $\text{KAPNO}$                              | Rickard and Pascoe (2009) |
| G4554 | TrGNC  | $\text{LHC4ACCO3} + \text{NO}_2 \rightarrow \text{LC5PAN1719}$                                                                                                                                                                                                                                                                                                                          | $\text{k\_CH3C03\_NO2}$                     | Rickard and Pascoe (2009) |
| G4555 | TrGNC  | $\text{LHC4ACCO3} + \text{NO}_3 \rightarrow .5 \text{CH}_3\text{COCH}_2\text{OH} + .5 \text{HOCH}_2\text{CHO} + .5 \text{CH}_3\text{C(O)OO} + .5 \text{CO} + .5 \text{HO}_2 + \text{NO}_2 + \text{CO}_2$                                                                                                                                                                                | $1.6*\text{KR02NO3}$                        | Rickard and Pascoe (2009) |
| G4556 | TrGC   | $\text{LHC4ACCO2H} + \text{OH} \rightarrow .5 \text{CH}_3\text{COCH}_2\text{OH} + .5 \text{HOCH}_2\text{CHO} + .5 \text{CH}_3\text{C(O)OO} + .5 \text{CO} + .5 \text{HO}_2 + \text{CO}_2$                                                                                                                                                                                               | $2.52\text{E-11}$                           | Rickard and Pascoe (2009) |

Table 1: Gas phase reactions (... continued)

| #      | labels   | reaction                                                                                                            | rate coefficient                                       | reference                                     |
|--------|----------|---------------------------------------------------------------------------------------------------------------------|--------------------------------------------------------|-----------------------------------------------|
| G4557  | TrGC     | $\text{LHC4ACCO3H} + \text{OH} \rightarrow \text{LHC4ACCO3}$                                                        | 2.88E-11                                               | Rickard and Pascoe (2009)                     |
| G4558  | TrGNC    | $\text{LC5PAN1719} \rightarrow \text{LHC4ACCO3} + \text{NO}_2$                                                      | k_PAN_M                                                | Rickard and Pascoe (2009)                     |
| G4559  | TrGNC    | $\text{LC5PAN1719} + \text{OH} \rightarrow .5 \text{ MACROH} + .5 \text{ HO12CO3C4} + \text{CO} + \text{NO}_2$      | 2.52E-11                                               | Rickard and Pascoe (2009)                     |
| G4560  | TrGC     | $\text{HCOC5} + \text{OH} \rightarrow \text{C59O2}$                                                                 | 3.81E-11                                               | Rickard and Pascoe (2009)                     |
| G4561  | TrGC     | $\text{C59O2} \rightarrow \text{CH}_3\text{COCH}_2\text{OH} + \text{HOCH}_2\text{CO}_3$                             | 9.20E-14*R02                                           | Rickard and Pascoe (2009)                     |
| G4562  | TrGC     | $\text{C59O2} + \text{HO}_2 \rightarrow \text{C59OOH}$                                                              | KR02HO2*0.706                                          | Rickard and Pascoe (2009)                     |
| G4563  | TrGNC    | $\text{C59O2} + \text{NO} \rightarrow \text{CH}_3\text{COCH}_2\text{OH} + \text{HOCH}_2\text{CO}_3 + \text{NO}_2$   | KR02NO                                                 | Rickard and Pascoe (2009)                     |
| G4564  | TrGNC    | $\text{C59O2} + \text{NO}_3 \rightarrow \text{CH}_3\text{COCH}_2\text{OH} + \text{HOCH}_2\text{CO}_3 + \text{NO}_2$ | KR02NO3                                                | Rickard and Pascoe (2009)                     |
| G4565  | TrGC     | $\text{C59OOH} + \text{OH} \rightarrow \text{C59O2}$                                                                | 9.7E-12                                                | Rickard and Pascoe (2009)                     |
| G6100  | StTrGCl  | $\text{Cl} + \text{O}_3 \rightarrow \text{ClO} + \text{O}_2$                                                        | 2.8E-11*EXP(-250./temp)                                | Atkinson et al. (2007)                        |
| G6101  | StGCl    | $\text{ClO} + \text{O}(^3\text{P}) \rightarrow \text{Cl} + \text{O}_2$                                              | 2.5E-11*EXP(110./temp)                                 | Atkinson et al. (2007)                        |
| G6102a | StTrGCl  | $\text{ClO} + \text{ClO} \rightarrow \text{Cl}_2 + \text{O}_2$                                                      | 1.0E-12*EXP(-1590./temp)                               | Atkinson et al. (2007)                        |
| G6102b | StTrGCl  | $\text{ClO} + \text{ClO} \rightarrow 2 \text{ Cl} + \text{O}_2$                                                     | 3.0E-11*EXP(-2450./temp)                               | Atkinson et al. (2007)                        |
| G6102c | StTrGCl  | $\text{ClO} + \text{ClO} \rightarrow \text{Cl} + \text{OClO}$                                                       | 3.5E-13*EXP(-1370./temp)                               | Atkinson et al. (2007)                        |
| G6102d | StTrGCl  | $\text{ClO} + \text{ClO} \rightarrow \text{Cl}_2\text{O}_2$                                                         | k_ClO_ClO                                              | Atkinson et al. (2007)                        |
| G6103  | StTrGCl  | $\text{Cl}_2\text{O}_2 \rightarrow \text{ClO} + \text{ClO}$                                                         | k_ClO_ClO/(9.3E-28*EXP(8835./temp))                    | Atkinson et al. (2007), Sander et al. (2006)* |
| G6200  | StGCl    | $\text{Cl} + \text{H}_2 \rightarrow \text{HCl} + \text{H}$                                                          | 3.9E-11*EXP(-2310./temp)                               | Atkinson et al. (2007)                        |
| G6201a | StGCl    | $\text{Cl} + \text{HO}_2 \rightarrow \text{HCl} + \text{O}_2$                                                       | 4.4E-11-7.5E-11*EXP(-620./temp)                        | Atkinson et al. (2007)                        |
| G6201b | StGCl    | $\text{Cl} + \text{HO}_2 \rightarrow \text{ClO} + \text{OH}$                                                        | 7.5E-11*EXP(-620./temp)                                | Atkinson et al. (2007)                        |
| G6202  | StTrGCl  | $\text{Cl} + \text{H}_2\text{O}_2 \rightarrow \text{HCl} + \text{HO}_2$                                             | 1.1E-11*EXP(-980./temp)                                | Atkinson et al. (2007)                        |
| G6203  | StGCl    | $\text{ClO} + \text{OH} \rightarrow .94 \text{ Cl} + .94 \text{ HO}_2 + .06 \text{ HCl} + .06 \text{ O}_2$          | 7.3E-12*EXP(300./temp)                                 | Atkinson et al. (2007)                        |
| G6204  | StTrGCl  | $\text{ClO} + \text{HO}_2 \rightarrow \text{HOCl} + \text{O}_2$                                                     | 2.2E-12*EXP(340./temp)                                 | Atkinson et al. (2007)                        |
| G6205  | StTrGCl  | $\text{HCl} + \text{OH} \rightarrow \text{Cl} + \text{H}_2\text{O}$                                                 | 1.7E-12*EXP(-230./temp)                                | Atkinson et al. (2007)                        |
| G6206  | StGCl    | $\text{HOCl} + \text{OH} \rightarrow \text{ClO} + \text{H}_2\text{O}$                                               | 3.0E-12*EXP(-500./temp)                                | Sander et al. (2006)                          |
| G6300  | StTrGNCl | $\text{ClO} + \text{NO} \rightarrow \text{NO}_2 + \text{Cl}$                                                        | 6.2E-12*EXP(295./temp)                                 | Atkinson et al. (2007)                        |
| G6301  | StTrGNCl | $\text{ClO} + \text{NO}_2 \rightarrow \text{ClNO}_3$                                                                | k_3rd_iupac(temp, cair, 1.6E-31, 3.4, 7.E-11, 0., 0.4) | Atkinson et al. (2007)                        |
| G6302  | TrGCl    | $\text{ClNO}_3 \rightarrow \text{ClO} + \text{NO}_2$                                                                | 6.918E-7*exp(-10909./temp)*cair                        | Anderson and Fahey (1990)                     |
| G6303  | StGNCl   | $\text{ClNO}_3 + \text{O}(^3\text{P}) \rightarrow \text{ClO} + \text{NO}_3$                                         | 4.5E-12*EXP(-900./temp)                                | Atkinson et al. (2007)                        |
| G6304  | StTrGNCl | $\text{ClNO}_3 + \text{Cl} \rightarrow \text{Cl}_2 + \text{NO}_3$                                                   | 6.2E-12*EXP(145./temp)                                 | Atkinson et al. (2007)                        |
| G6400  | StTrGCl  | $\text{Cl} + \text{CH}_4 \rightarrow \text{HCl} + \text{CH}_3\text{O}_2$                                            | 6.6E-12*EXP(-1240./temp)                               | Atkinson et al. (2006)                        |
| G6401  | StTrGCl  | $\text{Cl} + \text{HCHO} \rightarrow \text{HCl} + \text{CO} + \text{HO}_2$                                          | 8.1E-11*EXP(-34./temp)                                 | Atkinson et al. (2006)                        |
| G6402  | StTrGCl  | $\text{Cl} + \text{CH}_3\text{OOH} \rightarrow \text{HCHO} + \text{HCl} + \text{OH}$                                | 5.9E-11                                                | Atkinson et al. (2006)*                       |

Table 1: Gas phase reactions (... continued)

| #      | labels   | reaction                                                                                            | rate coefficient                                                                                                                                                             | reference                                              |
|--------|----------|-----------------------------------------------------------------------------------------------------|------------------------------------------------------------------------------------------------------------------------------------------------------------------------------|--------------------------------------------------------|
| G6403  | StTrGCl  | $\text{ClO} + \text{CH}_3\text{O}_2 \rightarrow \text{HO}_2 + \text{Cl} + \text{HCHO}$              | $3.3\text{E}-12 \cdot \text{EXP}(-115./\text{temp})$                                                                                                                         | Sander et al. (2006)                                   |
| G6404  | StGCl    | $\text{CCl}_4 + \text{O}(^1\text{D}) \rightarrow \text{ClO} + 3 \text{Cl}$                          | $3.3\text{E}-10$                                                                                                                                                             | Sander et al. (2006)                                   |
| G6405  | StGCl    | $\text{CH}_3\text{Cl} + \text{O}(^1\text{D}) \rightarrow \text{OH} + \text{Cl}$                     | $1.65\text{E}-10$                                                                                                                                                            | see note                                               |
| G6406  | StGCl    | $\text{CH}_3\text{Cl} + \text{OH} \rightarrow \text{H}_2\text{O} + \text{Cl}$                       | $2.4\text{E}-12 \cdot \text{EXP}(-1250./\text{temp})$                                                                                                                        | Sander et al. (2006)                                   |
| G6407  | StGCCl   | $\text{CH}_3\text{CCl}_3 + \text{O}(^1\text{D}) \rightarrow \text{OH} + 3 \text{Cl}$                | $3.\text{E}-10$                                                                                                                                                              | see note                                               |
| G6408  | StTrGCCl | $\text{CH}_3\text{CCl}_3 + \text{OH} \rightarrow \text{H}_2\text{O} + 3 \text{Cl}$                  | $1.64\text{E}-12 \cdot \text{EXP}(-1520./\text{temp})$                                                                                                                       | Sander et al. (2006)                                   |
| G6409  | TrGCCl   | $\text{Cl} + \text{C}_2\text{H}_4 \rightarrow \text{HOCH}_2\text{CH}_2\text{O}_2 + \text{HCl}$      | $k_{3\text{rd\_iupac}}(\text{temp}, \text{cair}, 1.85\text{E}-29, 3.3, 6.0\text{E}-10, 0.0, 0.4)$                                                                            | Atkinson et al. (2006)*                                |
| G6410  | TrGCCl   | $\text{Cl} + \text{CH}_3\text{CHO} \rightarrow \text{HCl} + \text{CH}_3\text{C}(\text{O})\text{OO}$ | $8.0\text{e}-11$                                                                                                                                                             | Atkinson et al. (2006)                                 |
| G6411  | TrGCCl   | $\text{C}_2\text{H}_2 + \text{Cl} \rightarrow \text{CH}_3\text{O}_2 + \text{HCl}$                   | $k_{3\text{rd\_iupac}}(\text{temp}, \text{cair}, 6.1\text{e}-30, 3.0, 2.0\text{e}-10, 0., 0.6)$                                                                              | Atkinson et al. (2006)                                 |
| G6412  | TrGCCl   | $\text{C}_2\text{H}_6 + \text{Cl} \rightarrow \text{CH}_3\text{O}_2 + \text{HCl}$                   | $8.3\text{E}-11 \cdot \text{EXP}(-100./\text{temp})$                                                                                                                         | Atkinson et al. (2006)                                 |
| G6500  | StGFCl   | $\text{CF}_2\text{Cl}_2 + \text{O}(^1\text{D}) \rightarrow \text{ClO} + \text{Cl}$                  | $1.4\text{E}-10$                                                                                                                                                             | Sander et al. (2006)                                   |
| G6501  | StGFCl   | $\text{CFCl}_3 + \text{O}(^1\text{D}) \rightarrow \text{ClO} + 2 \text{Cl}$                         | $2.3\text{E}-10$                                                                                                                                                             | Sander et al. (2006)                                   |
| G7100  | StTrGBr  | $\text{Br} + \text{O}_3 \rightarrow \text{BrO} + \text{O}_2$                                        | $1.7\text{E}-11 \cdot \text{EXP}(-800./\text{temp})$                                                                                                                         | Atkinson et al. (2007)                                 |
| G7101  | StGBr    | $\text{BrO} + \text{O}(^3\text{P}) \rightarrow \text{Br} + \text{O}_2$                              | $1.9\text{E}-11 \cdot \text{EXP}(230./\text{temp})$                                                                                                                          | Atkinson et al. (2007)                                 |
| G7102a | StTrGBr  | $\text{BrO} + \text{BrO} \rightarrow 2 \text{Br} + \text{O}_2$                                      | $2.7\text{E}-12$                                                                                                                                                             | Atkinson et al. (2007)                                 |
| G7102b | StTrGBr  | $\text{BrO} + \text{BrO} \rightarrow \text{Br}_2 + \text{O}_2$                                      | $2.9\text{E}-14 \cdot \text{EXP}(840./\text{temp})$                                                                                                                          | Atkinson et al. (2007)                                 |
| G7200  | StTrGBr  | $\text{Br} + \text{HO}_2 \rightarrow \text{HBr} + \text{O}_2$                                       | $7.7\text{E}-12 \cdot \text{EXP}(-450./\text{temp})$                                                                                                                         | Atkinson et al. (2007)                                 |
| G7201  | StTrGBr  | $\text{BrO} + \text{HO}_2 \rightarrow \text{HOBr} + \text{O}_2$                                     | $4.5\text{E}-12 \cdot \text{EXP}(500./\text{temp})$                                                                                                                          | Atkinson et al. (2007)                                 |
| G7202  | StTrGBr  | $\text{HBr} + \text{OH} \rightarrow \text{Br} + \text{H}_2\text{O}$                                 | $6.7\text{E}-12 \cdot \text{EXP}(155./\text{temp})$                                                                                                                          | Atkinson et al. (2007)                                 |
| G7203  | StGBr    | $\text{HOBr} + \text{O}(^3\text{P}) \rightarrow \text{OH} + \text{BrO}$                             | $1.2\text{E}-10 \cdot \text{EXP}(-430./\text{temp})$                                                                                                                         | Atkinson et al. (2007)                                 |
| G7204  | StTrGBr  | $\text{Br}_2 + \text{OH} \rightarrow \text{HOBr} + \text{Br}$                                       | $2.0\text{E}-11 \cdot \text{EXP}(240./\text{temp})$                                                                                                                          | Atkinson et al. (2007)                                 |
| G7300  | TrGBr    | $\text{Br} + \text{BrNO}_3 \rightarrow \text{Br}_2 + \text{NO}_3$                                   | $4.9\text{E}-11$                                                                                                                                                             | Orlando and Tyndall (1996)                             |
| G7301  | StTrGNBr | $\text{BrO} + \text{NO} \rightarrow \text{Br} + \text{NO}_2$                                        | $8.7\text{E}-12 \cdot \text{EXP}(260./\text{temp})$                                                                                                                          | Atkinson et al. (2007)                                 |
| G7302  | StTrGNBr | $\text{BrO} + \text{NO}_2 \rightarrow \text{BrNO}_3$                                                | $k_{\text{BrO\_NO2}}$                                                                                                                                                        | Atkinson et al. (2007)*                                |
| G7303  | TrGBr    | $\text{BrNO}_3 \rightarrow \text{BrO} + \text{NO}_2$                                                | $k_{\text{BrO\_NO2}} / (5.44\text{E}-9 \cdot \exp(14192./\text{temp}) \cdot 1.\text{E}6 \cdot R_{\text{gas}} \cdot \text{temp} / (\text{atm}2\text{Pa} \cdot N_{\text{A}}))$ | Orlando and Tyndall (1996),<br>Atkinson et al. (2007)* |
| G7400  | StTrGBr  | $\text{Br} + \text{HCHO} \rightarrow \text{HBr} + \text{CO} + \text{HO}_2$                          | $7.7\text{E}-12 \cdot \text{EXP}(-580./\text{temp})$                                                                                                                         | Atkinson et al. (2006)                                 |
| G7401  | TrGBr    | $\text{Br} + \text{CH}_3\text{OOH} \rightarrow \text{CH}_3\text{O}_2 + \text{HBr}$                  | $2.6\text{E}-12 \cdot \text{EXP}(-1600./\text{temp})$                                                                                                                        | Kondo and Benson (1984)                                |
| G7402a | TrGBr    | $\text{BrO} + \text{CH}_3\text{O}_2 \rightarrow \text{HOBr} + \text{HCHO}$                          | $G7402a_{\text{yield}} \cdot 5.7\text{E}-12$                                                                                                                                 | Aranda et al. (1997)                                   |
| G7402b | TrGBr    | $\text{BrO} + \text{CH}_3\text{O}_2 \rightarrow \text{Br} + \text{HCHO} + \text{HO}_2$              | $(1. - G7402a_{\text{yield}}) \cdot 5.7\text{E}-12$                                                                                                                          | Aranda et al. (1997)                                   |
| G7403  | StTrGBr  | $\text{CH}_3\text{Br} + \text{OH} \rightarrow \text{H}_2\text{O} + \text{Br}$                       | $2.35\text{E}-12 \cdot \text{EXP}(-1300./\text{temp})$                                                                                                                       | Sander et al. (2006)                                   |
| G7404  | TrGCBBr  | $\text{Br} + \text{C}_2\text{H}_4 \rightarrow \text{HOCH}_2\text{CH}_2\text{O}_2 + \text{HBr}$      | $2.8\text{E}-13 \cdot \text{EXP}(224./\text{temp}) / (1. + 1.13\text{E}24 \cdot \text{EXP}(-3200./\text{temp}) / C(\text{ind}_{02}))$                                        | Atkinson et al. (2006)*                                |

Table 1: Gas phase reactions (... continued)

| #      | labels    | reaction                                                                                            | rate coefficient                                                                                                                                         | reference                                                 |
|--------|-----------|-----------------------------------------------------------------------------------------------------|----------------------------------------------------------------------------------------------------------------------------------------------------------|-----------------------------------------------------------|
| G7405  | TrGCBBr   | $\text{Br} + \text{CH}_3\text{CHO} \rightarrow \text{HBr} + \text{CH}_3\text{C}(\text{O})\text{OO}$ | $1.8\text{e-}11 \cdot \text{EXP}(-460./\text{temp})$                                                                                                     | Atkinson et al. (2006)                                    |
| G7406  | TrGCBBr   | $\text{Br} + \text{C}_2\text{H}_2 \rightarrow \text{CH}_3\text{O}_2 + \text{HBr}$                   | $6.35\text{e-}15 \cdot \text{EXP}(440./\text{temp})$                                                                                                     | Atkinson et al. (2006)                                    |
| G7407  | TrGBr     | $\text{CHBr}_3 + \text{OH} \rightarrow \text{H}_2\text{O} + 3 \text{Br}$                            | $1.35\text{E-}12 \cdot \text{EXP}(-600./\text{temp})$                                                                                                    | Sander et al. (2006)*                                     |
| G7408  | TrGBr     | $\text{CH}_2\text{Br}_2 + \text{OH} \rightarrow \text{H}_2\text{O} + 2 \text{Br}$                   | $2.0\text{E-}12 \cdot \text{EXP}(-840./\text{temp})$                                                                                                     | Sander et al. (2006)*                                     |
| G7600  | TrGClBr   | $\text{Br} + \text{BrCl} \rightarrow \text{Br}_2 + \text{Cl}$                                       | 3.32E-15                                                                                                                                                 | Manion et al. (2010)                                      |
| G7601  | TrGClBr   | $\text{Br} + \text{Cl}_2 \rightarrow \text{BrCl} + \text{Cl}$                                       | 1.10E-15                                                                                                                                                 | Dolson and Leone (1987)                                   |
| G7602  | TrGClBr   | $\text{Br}_2 + \text{Cl} \rightarrow \text{BrCl} + \text{Br}$                                       | $2.3\text{E-}10 \cdot \text{EXP}(135./\text{temp})$                                                                                                      | Bedjanian et al. (1998)                                   |
| G7603a | StTrGClBr | $\text{BrO} + \text{ClO} \rightarrow \text{Br} + \text{OClO}$                                       | $1.6\text{E-}12 \cdot \text{EXP}(430./\text{temp})$                                                                                                      | Atkinson et al. (2007)                                    |
| G7603b | StTrGClBr | $\text{BrO} + \text{ClO} \rightarrow \text{Br} + \text{Cl} + \text{O}_2$                            | $2.9\text{E-}12 \cdot \text{EXP}(220./\text{temp})$                                                                                                      | Atkinson et al. (2007)                                    |
| G7603c | StTrGClBr | $\text{BrO} + \text{ClO} \rightarrow \text{BrCl} + \text{O}_2$                                      | $5.8\text{E-}13 \cdot \text{EXP}(170./\text{temp})$                                                                                                      | Atkinson et al. (2007)                                    |
| G7604  | TrGClBr   | $\text{BrCl} + \text{Cl} \rightarrow \text{Br} + \text{Cl}_2$                                       | 1.45E-11                                                                                                                                                 | Clyne and Cruse (1972)                                    |
| G7605  | TrGClBr   | $\text{CHCl}_2\text{Br} + \text{OH} \rightarrow \text{H}_2\text{O} + \text{Br}$                     | $2.0\text{E-}12 \cdot \text{EXP}(-840./\text{temp})$                                                                                                     | see note                                                  |
| G7606  | TrGClBr   | $\text{CHClBr}_2 + \text{OH} \rightarrow \text{H}_2\text{O} + 2 \text{Br}$                          | $2.0\text{E-}12 \cdot \text{EXP}(-840./\text{temp})$                                                                                                     | see note                                                  |
| G7607  | TrGClBr   | $\text{CH}_2\text{ClBr} + \text{OH} \rightarrow \text{H}_2\text{O} + \text{Br}$                     | $2.4\text{E-}12 \cdot \text{EXP}(-920./\text{temp})$                                                                                                     | Sander et al. (2006)*                                     |
| G8100  | TrGI      | $\text{I} + \text{O}_3 \rightarrow \text{IO} + \text{O}_2$                                          | $2.1\text{E-}11 \cdot \text{EXP}(-830./\text{temp})$                                                                                                     | Atkinson et al. (2007)                                    |
| G8102  | TrGI      | $\text{OIO} + \text{OIO} \rightarrow \text{I}_{\text{part}}$                                        | 5.E-11                                                                                                                                                   | von Glasow et al. (2002)*                                 |
| G8103  | TrGI      | $\text{IO} + \text{IO} \rightarrow .38 \text{OIO} + 1.62 \text{I} + .62 \text{O}_2$                 | $5.4\text{E-}11 \cdot \text{EXP}(180./\text{temp})$                                                                                                      | Atkinson et al. (2007)*                                   |
| G8200  | TrGI      | $\text{I} + \text{HO}_2 \rightarrow \text{HI} + \text{O}_2$                                         | $1.5\text{E-}11 \cdot \text{EXP}(-1090./\text{temp})$                                                                                                    | Atkinson et al. (2007)                                    |
| G8201  | TrGI      | $\text{IO} + \text{HO}_2 \rightarrow \text{HOI} + \text{O}_2$                                       | $1.4\text{E-}11 \cdot \text{EXP}(540./\text{temp})$                                                                                                      | Atkinson et al. (2007)                                    |
| G8202  | TrGI      | $\text{HI} + \text{OH} \rightarrow \text{I} + \text{H}_2\text{O}$                                   | $1.6\text{E-}11 \cdot \text{EXP}(440./\text{temp})$                                                                                                      | Atkinson et al. (2007)                                    |
| G8203  | TrGI      | $\text{OIO} + \text{OH} \rightarrow \text{HIO}_3$                                                   | $2.2\text{E-}10 \cdot \text{EXP}(243./\text{temp})$                                                                                                      | Plane et al. (2006)                                       |
| G8204  | TrGI      | $\text{I}_2 + \text{OH} \rightarrow \text{HOI} + \text{I}$                                          | 2.1E-10                                                                                                                                                  | Atkinson et al. (2007)                                    |
| G8300  | TrGI      | $\text{I} + \text{NO}_2 \rightarrow \text{INO}_2$                                                   | k_I_NO2                                                                                                                                                  | Atkinson et al. (2007)*                                   |
| G8301  | TrGI      | $\text{I} + \text{NO}_3 \rightarrow \text{IO} + \text{NO}_2$                                        | 1.E-10                                                                                                                                                   | Dillon et al. (2008)                                      |
| G8302  | TrGI      | $\text{IO} + \text{NO} \rightarrow \text{I} + \text{NO}_2$                                          | $7.15\text{E-}12 \cdot \text{EXP}(300./\text{temp})$                                                                                                     | Atkinson et al. (2007)                                    |
| G8303  | TrGI      | $\text{IO} + \text{NO}_2 \rightarrow \text{INO}_3$                                                  | $k_{\text{3rd\_iupac}}(\text{temp}, \text{cair}, 7.7\text{E-}31, 5., 1.6\text{E-}11, 0., 0.4)$                                                           | Atkinson et al. (2007)                                    |
| G8304  | TrGI      | $\text{OIO} + \text{NO} \rightarrow \text{NO}_2 + \text{IO}$                                        | $1.1\text{E-}12 \cdot \text{EXP}(542./\text{temp})$                                                                                                      | Atkinson et al. (2007)                                    |
| G8305  | TrGI      | $\text{INO}_2 \rightarrow \text{I} + \text{NO}_2$                                                   | $k_{\text{I\_NO2}} / (3.7\text{E-}7 \cdot \exp(9568./\text{temp}) * 1.\text{E6} * R_{\text{gas}} * \text{temp} / (\text{atm}2\text{Pa} * N_{\text{A}}))$ | van den Bergh and Troe (1976),<br>Atkinson et al. (2007)* |
| G8306  | TrGI      | $\text{INO}_3 \rightarrow \text{IO} + \text{NO}_2$                                                  | 0.                                                                                                                                                       | see note                                                  |
| G8307  | TrGI      | $\text{I}_2 + \text{NO}_3 \rightarrow \text{I} + \text{INO}_3$                                      | 1.5E-12                                                                                                                                                  | Atkinson et al. (2007)                                    |
| G8308  | TrGI      | $\text{IO} + \text{NO}_3 \rightarrow \text{OIO} + \text{NO}_2$                                      | 9.E-12                                                                                                                                                   | Dillon et al. (2008)                                      |
| G8400  | TrGI      | $\text{C}_3\text{H}_7\text{I} + \text{OH} \rightarrow \text{CH}_3\text{O}_2 + \text{I}$             | 1.22E-12                                                                                                                                                 | Carl and Crowley (2001)                                   |

Table 1: Gas phase reactions (... continued)

| #      | labels    | reaction                                                                                                                                           | rate coefficient                                                                         | reference                                  |
|--------|-----------|----------------------------------------------------------------------------------------------------------------------------------------------------|------------------------------------------------------------------------------------------|--------------------------------------------|
| G8401  | TrGI      | $\text{CH}_3\text{O}_2 + \text{IO} \rightarrow .4 \text{I} + .6 \text{OIO} + \text{HCHO} + \text{HO}_2$                                            | 2.E-12                                                                                   | Dillon et al. (2006b), Bale et al. (2005)* |
| G8402  | TrGI      | $\text{CH}_3\text{I} + \text{NO}_3 \rightarrow \text{HNO}_3 + \text{HCHO} + \text{IO}$                                                             | 3.4E-17                                                                                  | Wayne et al. (1991)*                       |
| G8600  | TrGClI    | $\text{IO} + \text{ClO} \rightarrow .2 \text{ICl} + .25 \text{Cl} + .55 \text{OCIO} + .8 \text{I} + .45 \text{O}_2$                                | $4.7\text{E-12} \cdot \text{EXP}(280./\text{temp})$                                      | Atkinson et al. (2007)                     |
| G8700  | TrGBrI    | $\text{I} + \text{BrO} \rightarrow \text{IO} + \text{Br}$                                                                                          | 1.2E-11                                                                                  | Sander et al. (2006)                       |
| G8701  | TrGBrI    | $\text{IO} + \text{BrO} \rightarrow \text{Br} + .8 \text{OIO} + .2 \text{I} + .2 \text{O}_2$                                                       | $1.5\text{E-11} \cdot \text{EXP}(510./\text{temp})$                                      | Atkinson et al. (2007)*                    |
| G9200  | StTrGS    | $\text{SO}_2 + \text{OH} \rightarrow \text{H}_2\text{SO}_4 + \text{HO}_2$                                                                          | $k_{3\text{rd}}(\text{temp}, \text{cair}, 3.3\text{E-31}, 4.3, 1.6\text{E-12}, 0., 0.6)$ | Sander et al. (2006)                       |
| G9400a | TrGS      | $\text{DMS} + \text{OH} \rightarrow \text{CH}_3\text{SO}_2 + \text{HCHO}$                                                                          | $1.13\text{E-11} \cdot \text{EXP}(-253./\text{temp})$                                    | Atkinson et al. (2004)*                    |
| G9400b | TrGS      | $\text{DMS} + \text{OH} \rightarrow \text{DMSO} + \text{HO}_2$                                                                                     | k_DMS_OH                                                                                 | Atkinson et al. (2004)*                    |
| G9401  | TrGNS     | $\text{DMS} + \text{NO}_3 \rightarrow \text{CH}_3\text{SO}_2 + \text{HNO}_3 + \text{HCHO}$                                                         | $1.9\text{E-13} \cdot \text{EXP}(520./\text{temp})$                                      | Atkinson et al. (2004)                     |
| G9402  | TrGS      | $\text{DMSO} + \text{OH} \rightarrow .6 \text{SO}_2 + \text{HCHO} + .6 \text{CH}_3\text{O}_2 + .4 \text{HO}_2 + .4 \text{CH}_3\text{SO}_3\text{H}$ | 1.E-10                                                                                   | Hynes and Wine (1996)                      |
| G9403  | TrGS      | $\text{CH}_3\text{SO}_2 \rightarrow \text{SO}_2 + \text{CH}_3\text{O}_2$                                                                           | $1.8\text{E13} \cdot \text{EXP}(-8661./\text{temp})$                                     | Barone et al. (1995)                       |
| G9404  | TrGS      | $\text{CH}_3\text{SO}_2 + \text{O}_3 \rightarrow \text{CH}_3\text{SO}_3$                                                                           | 3.E-13                                                                                   | Barone et al. (1995)                       |
| G9405  | TrGS      | $\text{CH}_3\text{SO}_3 + \text{HO}_2 \rightarrow \text{CH}_3\text{SO}_3\text{H}$                                                                  | 5.E-11                                                                                   | Barone et al. (1995)                       |
| G9600  | TrGSCl    | $\text{DMS} + \text{Cl} \rightarrow \text{CH}_3\text{SO}_2 + \text{HCl} + \text{HCHO}$                                                             | 3.3E-10                                                                                  | Atkinson et al. (2004)                     |
| G9700  | TrGSBr    | $\text{DMS} + \text{Br} \rightarrow \text{CH}_3\text{SO}_2 + \text{HBr} + \text{HCHO}$                                                             | $9.\text{E-11} \cdot \text{EXP}(-2386./\text{temp})$                                     | Jefferson et al. (1994)                    |
| G9701  | TrGSBr    | $\text{DMS} + \text{BrO} \rightarrow \text{DMSO} + \text{Br}$                                                                                      | 4.4E-13                                                                                  | Ingham et al. (1999)                       |
| G9800  | TrGSI     | $\text{DMS} + \text{IO} \rightarrow \text{DMSO} + \text{I}$                                                                                        | $3.2\text{E-13} \cdot \text{EXP}(-925./\text{temp})$                                     | Dillon et al. (2006a)                      |
| G10100 | TrGHg     | $\text{Hg} + \text{O}_3 \rightarrow \text{HgO} + \text{O}_2$                                                                                       | 3.0E-20                                                                                  | Hall (1995)                                |
| G10200 | TrGHg     | $\text{Hg} + \text{OH} \rightarrow \text{HgO} + \text{H}$                                                                                          | $3.55\text{E-14} \cdot \text{EXP}(294./\text{temp})$                                     | Pal and Ariya (2004)                       |
| G10201 | TrGHg     | $\text{Hg} + \text{H}_2\text{O}_2 \rightarrow \text{HgO} + \text{H}_2\text{O}$                                                                     | 8.5E-19                                                                                  | Tokos et al. (1998)*                       |
| G10600 | TrGHgCl   | $\text{Hg} + \text{Cl} \rightarrow \text{HgCl}$                                                                                                    | 1.0E-11                                                                                  | Ariya et al. (2002)                        |
| G10601 | TrGHgCl   | $\text{Hg} + \text{Cl}_2 \rightarrow \text{HgCl}_2$                                                                                                | 2.6E-18                                                                                  | Ariya et al. (2002)                        |
| G10700 | TrGHgBr   | $\text{Hg} + \text{Br} \rightarrow \text{HgBr}$                                                                                                    | 3.0E-13                                                                                  | Donohoue et al. (2006)                     |
| G10701 | TrGHgBr   | $\text{HgBr} + \text{Br} \rightarrow \text{HgBr}_2$                                                                                                | 3.0E-12                                                                                  | Calvert and Lindberg (2003)                |
| G10702 | TrGHgBr   | $\text{Hg} + \text{Br}_2 \rightarrow \text{HgBr}_2$                                                                                                | 9.0E-17                                                                                  | Ariya et al. (2002)                        |
| G10703 | TrGHgBr   | $\text{Hg} + \text{BrO} \rightarrow \text{HgO} + \text{Br}$                                                                                        | 1.0E-15                                                                                  | Raofie and Ariya (2003)                    |
| G10704 | TrGHgBr   | $\text{HgBr} + \text{BrO} \rightarrow \text{BrHgOBr}$                                                                                              | 3.0E-12                                                                                  | Calvert and Lindberg (2003)                |
| G10705 | TrGHgClBr | $\text{HgCl} + \text{BrO} \rightarrow \text{ClHgOBr}$                                                                                              | 3.0E-12                                                                                  | Calvert and Lindberg (2003)                |
| G10706 | TrGHgClBr | $\text{HgBr} + \text{Cl} \rightarrow \text{ClHgBr}$                                                                                                | 3.0E-12                                                                                  | Calvert and Lindberg (2003)                |
| G10707 | TrGHgClBr | $\text{HgCl} + \text{Br} \rightarrow \text{ClHgBr}$                                                                                                | 3.0E-12                                                                                  | Calvert and Lindberg (2003)                |

\*Notes:

Rate coefficients for three-body reactions are defined via the function `k_3rd(T, M, k0300, n, kinf300, m, fc)`. In the code, the temperature  $T$  is called `temp` and the concentration of “air molecules”  $M$  is called `cair`. Using the auxiliary variables  $k_0(T)$ ,  $k_{\text{inf}}(T)$ , and  $k_{\text{ratio}}$ , `k_3rd` is defined as:

$$k_0(T) = k_0^{300} \times \left(\frac{300\text{K}}{T}\right)^n \quad (1)$$

$$k_{\text{inf}}(T) = k_{\text{inf}}^{300} \times \left(\frac{300\text{K}}{T}\right)^m \quad (2)$$

$$k_{\text{ratio}} = \frac{k_0(T)M}{k_{\text{inf}}(T)} \quad (3)$$

$$\mathbf{k\_3rd} = \frac{k_0(T)M}{1 + k_{\text{ratio}}} \times f_c \left( \frac{1}{1 + (\log_{10}(k_{\text{ratio}}))^2} \right) \quad (4)$$

A similar function, called `k_3rd_iupac` here, is used by Atkinson et al. (2005) for three-body reactions. It has the same function parameters as `k_3rd` and it is defined as:

$$k_0(T) = k_0^{300} \times \left(\frac{300\text{K}}{T}\right)^n \quad (5)$$

$$k_{\text{inf}}(T) = k_{\text{inf}}^{300} \times \left(\frac{300\text{K}}{T}\right)^m \quad (6)$$

$$k_{\text{ratio}} = \frac{k_0(T)M}{k_{\text{inf}}(T)} \quad (7)$$

$$N = 0.75 - 1.27 \times \log_{10}(f_c) \quad (8)$$

$$\mathbf{k\_3rd\_iupac} = \frac{k_0(T)M}{1 + k_{\text{ratio}}} \times f_c \left( \frac{1}{1 + (\log_{10}(k_{\text{ratio}})/N)^2} \right) \quad (9)$$

G1002: The path leading to  $2 \text{ O}(^3\text{P}) + \text{O}_2$  results in a null cycle regarding odd oxygen and is neglected.

G2110: The rate coefficient is: `k_H02_H02 = (1.5E-12*EXP(19./temp)+1.7E-33*EXP(1000./temp)`

`*cair)* (1.+1.4E-21*EXP(2200./temp)*C(ind_H2O))`. The value for the first (pressure-independent) part is from Christensen et al. (2002), the water term from Kircher and Sander (1984).

G3109: The rate coefficient is: `k_NO3_NO2 = k_3rd(temp, cair, 2.E-30, 4.4, 1.4E-12, 0.7, 0.6)`.

G3110: The rate coefficient is defined as backward reaction divided by equilibrium constant.

G3203: The rate coefficient is: `k_NO2_H02 = k_3rd(temp, cair, 1.8E-31, 3.2, 4.7E-12, 1.4, 0.6)`.

G3206: The rate coefficient is: `k_HNO3_OH = 2.4E-14 * EXP(460./temp) + 1./ ( 1./ (6.5E-34 * EXP(1335./temp)*cair) + 1./ (2.7E-17 * EXP(2199./temp)) )`

G3207: The rate coefficient is defined as backward reaction divided by equilibrium constant.

G4103: Sander et al. (2006) recommend a zero product yield for HCHO.

G4107: The rate coefficient is: `k_CH300H_OH = 3.8E-12*EXP(200./temp)`.

G4109: The same temperature dependence assumed as for  $\text{CH}_3\text{CHO} + \text{NO}_3$ .

G4201: The product distribution is from Rickard and Pascoe (2009), after substitution of the Criegee intermediate by its decomposition products.

G4206: The product  $\text{C}_2\text{H}_5\text{OH}$ , which reacts only with OH, is substituted by its degradation products  $\approx 0.1 \text{ HOCH}_2\text{CH}_2\text{O}_2 + 0.9 \text{ CH}_3\text{CHO} + 0.9 \text{ HO}_2$ .

G4207: The rate constant  $8.01\text{E-}12$  is for the H abstraction in alpha to the  $-\text{OOH}$  group (Rickard and Pascoe, 2009) and  $0.6 * \mathbf{k\_CH300H\_OH}$  is for the  $\text{C}_2\text{H}_5\text{O}_2$  channel. The branching ratios are calculated from the terms of the rate coefficient at 298 K.

G4218: The rate coefficient is the same as for the  $\text{CH}_3\text{O}_2$  channel in G4107 ( $\text{CH}_3\text{OOH} + \text{OH}$ ).

G4221: The rate coefficient `isk_PAN_M = k_CH3CO3_NO2/9.E-29*EXP(-14000./temp)`, i.e. the rate coefficient is defined as backward reaction divided by equilibrium constant.

G4243: Orlando et al. (1998) estimated that about 25% of the  $\text{HOCH}_2\text{CH}_2\text{O}$  in this reaction is produced with sufficient excess energy that it decomposes promptly. The decomposition products are  $2 \text{ HCHO} + \text{HO}_2$ .

G4300: The product  $\text{NC3H7O2}$  is substituted with its degradation products  $\text{C}_2\text{H}_5\text{O}_2 + \text{CO}_2 + \text{HO}_2$ .

G4301: The product distribution is for terminal olefin carbons from Zaveri and Peters (1999).

G4304: The value for the generic  $\text{RO}_2 + \text{HO}_2$  reaction from Atkinson (1997) is used here.

G4306: The MCM (Rickard and Pascoe, 2009) products are  $0.2 \text{ IPROPOL} + 0.2 \text{ CH}_3\text{COCH}_3 + 0.6 \text{ IC3H7O}$ . IPROPOL and IC3H7O are substituted with their degradation products. We assume IPROPOL to be oxidized entirely to  $\text{CH}_3\text{COCH}_3 + \text{HO}_2$  by OH. IC3H7O +  $\text{O}_2$  produces the same products.

G4307: Analogous to G4207 for both rate coefficient and branching ratios.

G4400:  $\text{LC}_4\text{H}_9\text{O}_2$  represents  $0.127 \text{ NC4H9O2} + 0.873 \text{ SC4H9O2}$ .

G4401:  $\text{NC4H9O}$  and  $\text{SC4H9O}$  are substituted with  $2 \text{ CO}_2 + \text{C}_2\text{H}_5\text{O}_2$  and  $0.636 \text{ MEK} + \text{HO}_2$  and  $0.364 \text{ CH}_3\text{CHO} + \text{C}_2\text{H}_5\text{O}_2$ , respectively. The stoichiometric coefficients on the right side are weighted averages.

G4403: The alkyl nitrate yield is the weighted average yield for the two isomers forming from  $\text{NC4H9O2}$  and  $\text{SC4H9O2}$ .

G4404: The product distribution is the weighted average of the single isomer hydroperoxides. It is calculated from the rate constants of single channels and the ratio of the isomers  $\text{NC4H9O2}$  and  $\text{SC4H9O2}$ . The



overall rate constant for this reaction is calculated as weighted average of the channels rate constants. The relative weight of the products from NC4H9OOH and SC4H9OOH are then 0.0887 and 0.9113. The channels producing RO<sub>2</sub> are given the rate coefficient 0.6\*k<sub>CH3OOH\_OH</sub> as for G4107. For NC4H9OOH the products are 0.327 NC4H9O2 + 0.673 C3H7CHO + 0.673 OH. C3H7CHO is then substituted with 2 CO<sub>2</sub> + C<sub>2</sub>H<sub>5</sub>O<sub>2</sub>. Hence, 0.327 NC4H9O2 + 1.346 CO<sub>2</sub> + 0.673 C<sub>2</sub>H<sub>5</sub>O<sub>2</sub> + 0.673 OH. For SC4H9OOH the products are 0.219 SC4H9O2 + 0.781 MEK + 0.781 OH.

G4413: LMEKO2 represents 0.459 MEKAO2 + 0.462 MEKBO2 + 0.079 MEKCO2.

G4415: Alkyl nitrate formation is neglected. The products of MEKAO and MEKCO are substituted with HCHO + CO<sub>2</sub> + HOCH<sub>2</sub>CH<sub>2</sub>O<sub>2</sub> and HCHO + CO<sub>2</sub> + C<sub>2</sub>H<sub>5</sub>O<sub>2</sub>.

G4416: LMEKOOH is assumed having the composition 0.459 MEKAOOH + 0.462 MEKBOOH + 0.079 MEKCOOH. MEKAOOH + OH gives 0.89 CO2C3CHO + 0.89 OH + 0.11 MEKAO2 + H<sub>2</sub>O. CO2C3CHO is substituted with CH<sub>3</sub>COCH<sub>2</sub>O<sub>2</sub> + CO<sub>2</sub> and the products become 0.89 CH<sub>3</sub>COCH<sub>2</sub>O<sub>2</sub> + 0.89 CO<sub>2</sub> + 0.89 OH + 0.11 MEKAO2 + H<sub>2</sub>O. MEKBOOH + OH gives 0.758 BIACET + 0.758 OH + 0.242 MEKBO2 + H<sub>2</sub>O. MEKCOOH + OH gives 0.614 EGLYOX + 0.614 OH + 0.386 MEKCO2 + H<sub>2</sub>O. EGLYOX is substituted with C<sub>2</sub>H<sub>5</sub>O<sub>2</sub> + 2 CO<sub>2</sub> and the products become 0.614 C<sub>2</sub>H<sub>5</sub>O<sub>2</sub> + 1.228 CO<sub>2</sub> + 0.614 OH + 0.386 MEKCO2 + H<sub>2</sub>O.

G4417: The rate coefficient is the combination of the ones for the two isomers weighted by the relative abundances for NC4H9NO3 and SC4H9NO3, respectively. Product distribution is calculated accordingly. NC4H9NO3 + OH gives C3H7CHO + NO<sub>2</sub> + H<sub>2</sub>O with C3H7CHO being substituted with 2 CO<sub>2</sub> + C<sub>2</sub>H<sub>5</sub>O<sub>2</sub>. After substitution is obtained 2 CO<sub>2</sub> + C<sub>2</sub>H<sub>5</sub>O<sub>2</sub> +

NO<sub>2</sub> + H<sub>2</sub>O. SC4H9NO3 + OH gives MEK + NO<sub>2</sub> + H<sub>2</sub>O For the product distribution NC4H9NO3 and SC4H9NO3 account for 0.08577 and 0.91423, respectively.

G4419: The same value as for PAN is assumed.

G4420: Products are as in G4415. Only the main channels for each isomer are considered. Rate constant is the weighted average for the isomers.

G4437: LHMVKABO2 is a lumped species of virtual composition 0.3 HVMVKA02 + 0.7 HVMVKBO2. The products are the weighted average for the permutation reactions of each single RO2 in the MCM (Rickard and Pascoe, 2009).

G4439: products are the weighted average for the decomposition of 0.3 HVMVKA0 + 0.7 HVMVKBO.

G4440: as for G4439

G4441: The rate coefficient and products are 30% for HVMVKA0OH and 70% for HVMVKBOOH.

G4444: LMVKOHABO2 is a lumped species of virtual composition 0.3 MVKOHAO2 + 0.7 MVKOHBO2. The products are the weighted average for the permutation reactions of each single RO2 in the MCM (Rickard and Pascoe, 2009).

G4446: products are the weighted average for the decomposition of 0.3 MVKOHAO + 0.7 MVKOHBO.

G4447: as for G4446

G4448: The rate coefficient and products are 30% for MVKOHAAOH and 70% for MVKOHBOOH.

G6103: The rate coefficient is defined as backward reaction divided by equilibrium constant.

G6402: The initial products are probably HCl and CH<sub>2</sub>OOH (Atkinson et al., 2006). It is assumed that CH<sub>2</sub>OOH dissociates into HCHO and OH.

G6405: Average of reactions with CH<sub>3</sub>Br and CH<sub>3</sub>F from Sander et al. (2006) (B. Steil, pers. comm.).

G6407: Rough extrapolation from reactions with CH<sub>3</sub>CF<sub>3</sub>, CH<sub>3</sub>CClF<sub>2</sub>, and CH<sub>3</sub>CCl<sub>2</sub>F from Sander et al. (2006).

G6409: It is assumed that the reaction liberates all Cl atoms in the form of HCl.

G7302: The rate coefficient is:  $k_{BrO\_NO2} = k_{3rd}(temp, cair, 5.2E-31, 3.2, 6.9E-12, 2.9, 0.6)$ .

G7303: The rate coefficient is defined as backward reaction (Atkinson et al., 2007) divided by equilibrium constant (Orlando and Tyndall, 1996).

G7404: It is assumed that the reaction liberates all Br atoms in the form of HBr.

G7407: It is assumed that the reaction liberates all Br atoms. The fate of the carbon atom is currently not considered.

G7408: It is assumed that the reaction liberates all Br atoms. The fate of the carbon atom is currently not considered.

G7605: Same value as for G7408: CH<sub>2</sub>Br<sub>2</sub>+OH assumed. It is assumed that the reaction liberates all Br atoms but not Cl. The fate of the carbon atom is currently not considered.

G7606: Same value as for G7408: CH<sub>2</sub>Br<sub>2</sub>+OH assumed. It is assumed that the reaction liberates all Br atoms but not Cl. The fate of the carbon atom is currently not considered.

G7607: It is assumed that the reaction liberates all Br atoms but not Cl. The fate of the carbon atom is currently not considered.

G8102: It is assumed that the reaction produces new particles.

G8103: The yield of 38 % OIO is from Atkinson et al. (2007). It is assumed here that the remaining 62 % produce 2 I + O<sub>2</sub>.

G8300: The rate coefficient is:  $k_{I\_NO2} = k_{3rd\_iupac}(temp, cair, 3.E-31, 1., 6.6E-11, 0., 0.63)$ .

G8305: The rate coefficient is defined as backward reaction (Atkinson et al., 2007) divided by equilibrium constant (van den Bergh and Troe, 1976).

G8306: According to John Plane and John Crowley (pers. comm. 2007), the rate coefficient of  $1.1E15*EXP(-12060./temp)$  suggested by Atkinson et al. (2007) is wrong.

G8401: The rate coefficient is from Dillon et al. (2006b), the yield of I atoms is a lower limit given on page 2170 of Bale et al. (2005).

G8402: The products are from Nakano et al. (2005).

G8701: 80% Br + OIO production is from Atkinson et al. (2007). The remaining channels are assumed to produce Br + I + O<sub>2</sub>.

G9400: Addition path. The rate coefficient is:  $k_{DMS\_OH} = 1.0E-39*EXP(5820./temp)*C(ind\_O2) / (1.+5.0E-30*EXP(6280./temp)*C(ind\_O2))$ .

G10201: Upper limit.

Table 2: Photolysis reactions

| #      | labels  | reaction                                                               | rate coefficient                | reference                  |
|--------|---------|------------------------------------------------------------------------|---------------------------------|----------------------------|
| J1000  | StTrGJ  | $O_2 + h\nu \rightarrow O(^3P) + O(^3P)$                               | jx(ip_02)                       | see note                   |
| J1001a | StTrGJ  | $O_3 + h\nu \rightarrow O(^1D)$                                        | jx(ip_01D)                      | see note                   |
| J1001b | StTrGJ  | $O_3 + h\nu \rightarrow O(^3P)$                                        | jx(ip_03P)                      | see note                   |
| J2100  | StGJ    | $H_2O + h\nu \rightarrow H + OH$                                       | jx(ip_H20)                      | see note                   |
| J2101  | StTrGJ  | $H_2O_2 + h\nu \rightarrow 2 OH$                                       | jx(ip_H202)                     | see note                   |
| J3100  | StGNJ   | $N_2O + h\nu \rightarrow O(^1D)$                                       | jx(ip_N20)                      | see note                   |
| J3101  | StTrGNJ | $NO_2 + h\nu \rightarrow NO + O(^3P)$                                  | jx(ip_NO2)                      | see note                   |
| J3102  | StGNJ   | $NO + h\nu \rightarrow N + O(^3P)$                                     | jx(ip_NO)                       | see note                   |
| J3103a | StTrGNJ | $NO_3 + h\nu \rightarrow NO_2 + O(^3P)$                                | jx(ip_NO20)                     | see note                   |
| J3103b | StTrGNJ | $NO_3 + h\nu \rightarrow NO$                                           | jx(ip_NO02)                     | see note                   |
| J3104a | StTrGNJ | $N_2O_5 + h\nu \rightarrow NO_2 + NO_3$                                | jx(ip_N205)                     | see note                   |
| J3104b | StGNJ   | $N_2O_5 + h\nu \rightarrow NO + O(^3P) + NO_3$                         | jx(ip_NO3N00)                   | see note                   |
| J3200  | TrGJ    | $HONO + h\nu \rightarrow NO + OH$                                      | jx(ip_HONO)                     | see note                   |
| J3201  | StTrGNJ | $HNO_3 + h\nu \rightarrow NO_2 + OH$                                   | jx(ip_HN03)                     | see note                   |
| J3202  | StTrGNJ | $HNO_4 + h\nu \rightarrow .667 NO_2 + .667 HO_2 + .333 NO_3 + .333 OH$ | jx(ip_HN04)                     | see note                   |
| J4100  | StTrGJ  | $CH_3OOH + h\nu \rightarrow HCHO + OH + HO_2$                          | jx(ip_CH300H)                   | see note                   |
| J4101a | StTrGJ  | $HCHO + h\nu \rightarrow H_2 + CO$                                     | jx(ip_COH2)                     | see note                   |
| J4101b | StTrGJ  | $HCHO + h\nu \rightarrow H + CO + HO_2$                                | jx(ip_CHOH)                     | see note                   |
| J4102  | StGJ    | $CO_2 + h\nu \rightarrow CO + O(^3P)$                                  | jx(ip_CO2)                      | see note                   |
| J4103  | StGJ    | $CH_4 + h\nu \rightarrow CO + 0.31 H + 0.69 H_2 + 1.155 H_2O$          | jx(ip_CH4)                      | see note                   |
| J4200  | TrG CJ  | $C_2H_5OOH + h\nu \rightarrow CH_3CHO + HO_2 + OH$                     | jx(ip_CH300H)                   | von Kuhlmann (2001)*       |
| J4201  | TrG CJ  | $CH_3CHO + h\nu \rightarrow CH_3O_2 + HO_2 + CO$                       | jx(ip_CH3CHO)                   | see note                   |
| J4202  | TrG CJ  | $CH_3C(O)OOH + h\nu \rightarrow CH_3O_2 + OH + CO_2$                   | jx(ip_CH3C03H)                  | see note                   |
| J4204  | TrGNCJ  | $PAN + h\nu \rightarrow CH_3C(O)OO + NO_2$                             | jx(ip_PAN)                      | see note                   |
| J4205  | TrG CJ  | $HOCH_2CHO + h\nu \rightarrow HO_2 + HCHO + HO_2 + CO$                 | jx(ip_HOCH2CHO)                 | see note                   |
| J4206  | TrG CJ  | $HOCH_2CO_3H + h\nu \rightarrow HCHO + HO_2 + OH + CO_2$               | jx(ip_CH300H)                   | Rickard (2009)* and Pascoe |
| J4207  | TrG CJ  | $PHAN + h\nu \rightarrow HOCH_2CO_3 + NO_2$                            | jx(ip_PAN)                      | see note                   |
| J4208  | TrG CJ  | $GLYOX + h\nu \rightarrow 2 CO + 2 HO_2$                               | jx(ip_GLYOX)                    | see note                   |
| J4209  | TrGNCJ  | $HCOCO_2H + h\nu \rightarrow 2 HO_2 + CO + CO_2$                       | jx(ip_MGLYOX)                   | Rickard (2009)* and Pascoe |
| J4210  | TrGNCJ  | $HCOCO_3H + h\nu \rightarrow HO_2 + CO + OH + CO_2$                    | (jx(ip_CH300H)+jx(ip_HOCH2CHO)) | Rickard (2009)* and Pascoe |

Table 2: Photolysis reactions (... continued)

| #     | labels | reaction                                                                                                                                                                                                                               | rate coefficient                  | reference                   |
|-------|--------|----------------------------------------------------------------------------------------------------------------------------------------------------------------------------------------------------------------------------------------|-----------------------------------|-----------------------------|
| J4211 | TrGCJ  | $\text{HYETHO2H} + h\nu \rightarrow \text{HOCH}_2\text{CH}_2\text{O} + \text{OH}$                                                                                                                                                      | $\text{jx(ip\_CH300H)}$           | Rickard and Pascoe (2009)*  |
| J4212 | TrGCJ  | $\text{ETHOHNO3} + h\nu \rightarrow \text{HO}_2 + 2 \text{HCHO} + \text{NO}_2$                                                                                                                                                         | J_IC3H7N03                        | see note                    |
| J4300 | TrGCJ  | $\text{iC}_3\text{H}_7\text{OOH} + h\nu \rightarrow \text{CH}_3\text{COCH}_3 + \text{HO}_2 + \text{OH}$                                                                                                                                | $\text{jx(ip\_CH300H)}$           | von Kuhlmann (2001)*        |
| J4301 | TrGCJ  | $\text{CH}_3\text{COCH}_3 + h\nu \rightarrow \text{CH}_3\text{C(O)OO} + \text{CH}_3\text{O}_2$                                                                                                                                         | $\text{jx(ip\_CH3COCH3)}$         | see note                    |
| J4302 | TrGCJ  | $\text{CH}_3\text{COCH}_2\text{OH} + h\nu \rightarrow \text{CH}_3\text{C(O)OO} + \text{HCHO} + \text{HO}_2$                                                                                                                            | J_ACETOL                          | see note                    |
| J4303 | TrGCJ  | $\text{MGLYOX} + h\nu \rightarrow \text{CH}_3\text{C(O)OO} + \text{CO} + \text{HO}_2$                                                                                                                                                  | $\text{jx(ip\_MGLYOX)}$           | see note                    |
| J4304 | TrGCJ  | $\text{CH}_3\text{COCH}_2\text{O}_2\text{H} + h\nu \rightarrow \text{CH}_3\text{C(O)OO} + \text{HCHO} + \text{OH}$                                                                                                                     | $\text{jx(ip\_CH300H)+J\_ACETOL}$ | Rickard and Pascoe (2009)*  |
| J4306 | TrGNCJ | $\text{iC}_3\text{H}_7\text{ONO}_2 + h\nu \rightarrow \text{CH}_3\text{COCH}_3 + \text{NO}_2 + \text{HO}_2$                                                                                                                            | J_IC3H7N03                        | von Kuhlmann et al. (2003)* |
| J4307 | TrGCJ  | $\text{NOA} + h\nu \rightarrow \text{CH}_3\text{C(O)OO} + \text{HCHO} + \text{NO}_2$                                                                                                                                                   | J_IC3H7N03+jx(ip\_CH3COCH3)       | see note                    |
| J4308 | TrGCJ  | $\text{HOCH}_2\text{COCO}_2\text{H} + h\nu \rightarrow \text{HOCH}_2\text{CO}_3 + \text{HO}_2 + \text{CO}_2$                                                                                                                           | $\text{jx(ip\_MGLYOX)}$           | Rickard and Pascoe (2009)*  |
| J4309 | TrGCJ  | $\text{HYPROPO}_2\text{H} + h\nu \rightarrow \text{CH}_3\text{CHO} + \text{HCHO} + \text{HO}_2 + \text{OH}$                                                                                                                            | $\text{jx(ip\_CH300H)}$           | Rickard and Pascoe (2009)*  |
| J4310 | TrGNCJ | $\text{PR}_2\text{O}_2\text{HNO}_3 + h\nu \rightarrow \text{NOA} + \text{HO}_2 + \text{OH}$                                                                                                                                            | $\text{jx(ip\_CH300H)}$           | Rickard and Pascoe (2009)*  |
| J4311 | TrGCJ  | $\text{HOCH}_2\text{COCHO} + h\nu \rightarrow \text{HOCH}_2\text{CO}_3 + \text{CO} + \text{HO}_2$                                                                                                                                      | $\text{jx(ip\_MGLYOX)}$           | Rickard and Pascoe (2009)*  |
| J4400 | TrGCJ  | $\text{LC}_4\text{H}_9\text{OOH} + h\nu \rightarrow \text{OH} + 0.254 \text{CO}_2 + 0.5552 \text{MEK} + 0.5552 \text{HO}_2 + 0.3178 \text{CH}_3\text{CHO} + 0.4448 \text{C}_2\text{H}_5\text{O}_2$                                     | $\text{jx(ip\_CH300H)}$           | Rickard and Pascoe (2009)*  |
| J4401 | TrGCJ  | $\text{MVK} + h\nu \rightarrow .5 \text{C}_3\text{H}_6 + .5 \text{CH}_3\text{C(O)OO} + .5 \text{HCHO} + \text{CO} + .5 \text{HO}_2$                                                                                                    | $\text{jx(ip\_MVK)}$              | see note                    |
| J4403 | TrGCJ  | $\text{MEK} + h\nu \rightarrow \text{CH}_3\text{C(O)OO} + \text{C}_2\text{H}_5\text{O}_2$                                                                                                                                              | $0.42*\text{jx(ip\_CHOH)}$        | von Kuhlmann et al. (2003)* |
| J4404 | TrGCJ  | $\text{LMEKOOH} + h\nu \rightarrow 0.538 \text{HCHO} + 0.538 \text{CO}_2 + 0.459 \text{HOCH}_2\text{CH}_2\text{O}_2 + 0.079 \text{C}_2\text{H}_5\text{O}_2 + 0.462 \text{CH}_3\text{C(O)OO} + 0.462 \text{CH}_3\text{CHO} + \text{OH}$ | $\text{jx(ip\_CH300H)}$           | Rickard and Pascoe (2009)*  |
| J4405 | TrGCJ  | $\text{BIACET} + h\nu \rightarrow 2 \text{CH}_3\text{C(O)OO}$                                                                                                                                                                          | $2.15*\text{jx(ip\_MGLYOX)}$      | see note                    |
| J4406 | TrGNCJ | $\text{LC}_4\text{H}_9\text{NO}_3 + h\nu \rightarrow \text{NO}_2 + 0.254 \text{CO}_2 + 0.5552 \text{MEK} + 0.5552 \text{HO}_2 + 0.3178 \text{CH}_3\text{CHO} + 0.4448 \text{C}_2\text{H}_5\text{O}_2$                                  | J_IC3H7N03                        | see note                    |
| J4407 | TrGNCJ | $\text{MPAN} + h\nu \rightarrow \text{MACO}_3 + \text{NO}_2$                                                                                                                                                                           | $\text{jx(ip\_PAN)}$              | see note                    |
| J4408 | TrGCJ  | $\text{LMVKOHABOOH} + h\nu \rightarrow .3 \text{HOCH}_2\text{COCHO} + .3 \text{HCHO} + .3 \text{HO}_2 + .7 \text{HOCH}_2\text{CHO} + .7 \text{HOCH}_2\text{CO}_3 + \text{OH}$                                                          | $\text{J\_ACETOL+jx(ip\_CH300H)}$ | Rickard and Pascoe (2009)*  |

Table 2: Photolysis reactions (... continued)

| #     | labels | reaction                                                                                                                                                                       | rate coefficient                                | reference                  |
|-------|--------|--------------------------------------------------------------------------------------------------------------------------------------------------------------------------------|-------------------------------------------------|----------------------------|
| J4409 | TrGCJ  | $\text{CO}_2\text{H}_3\text{CO}_3\text{H} + h\nu \rightarrow \text{MGLYOX} + \text{HO}_2 + \text{OH} + \text{CO}_2$                                                            | $\text{jx}(\text{ip\_CH300H})$                  | Rickard (2009)* and Pascoe |
| J4410 | TrGCJ  | $\text{CO}_2\text{H}_3\text{CO}_3\text{H} + h\nu \rightarrow \text{CH}_3\text{C}(\text{O})\text{OO} + \text{HO}_2 + \text{HCOCO}_3\text{H}$                                    | J_ACETOL                                        | Rickard (2009)* and Pascoe |
| J4411 | TrGCJ  | $\text{MACR} + h\nu \rightarrow .5 \text{MACO}_3 + .5 \text{CH}_3\text{C}(\text{O})\text{OO} + .5 \text{HCHO} + .5 \text{CO} + \text{HO}_2$                                    | $\text{jx}(\text{ip\_MACR})$                    | see note                   |
| J4412 | TrGCJ  | $\text{MACROOH} + h\nu \rightarrow \text{CH}_3\text{COCH}_2\text{OH} + \text{HCHO} + \text{HO}_2 + \text{OH}$                                                                  | $\text{jx}(\text{ip\_CH300H})$                  | Rickard (2009)* and Pascoe |
| J4413 | TrGCJ  | $\text{MACROOH} + h\nu \rightarrow \text{CH}_3\text{COCH}_2\text{OH} + \text{CO} + \text{HO}_2 + \text{OH}$                                                                    | $2.77 * \text{jx}(\text{ip\_HOCH}_2\text{CHO})$ | see note                   |
| J4414 | TrGCJ  | $\text{MACROH} + h\nu \rightarrow \text{CH}_3\text{COCH}_2\text{OH} + \text{CO} + \text{HO}_2 + \text{HO}_2$                                                                   | $2.77 * \text{jx}(\text{ip\_HOCH}_2\text{CHO})$ | see note                   |
| J4415 | TrGCJ  | $\text{MACO}_3\text{H} + h\nu \rightarrow \text{CH}_3\text{C}(\text{O})\text{OO} + \text{HCHO} + \text{OH} + \text{CO}_2$                                                      | $\text{jx}(\text{ip\_CH300H})$                  | Rickard (2009)* and Pascoe |
| J4416 | TrGCJ  | $\text{LHMVKABOOH} + h\nu \rightarrow .3 \text{MGLYOX} + .7 \text{CH}_3\text{C}(\text{O})\text{OO} + .7 \text{HOCH}_2\text{CHO} + .3 \text{HCHO} + .3 \text{HO}_2 + \text{OH}$ | $\text{jx}(\text{ip\_CH300H})$                  | Rickard (2009)* and Pascoe |
| J4417 | TrGCJ  | $\text{MVKOH} + h\nu \rightarrow .5 \text{HCHO} + .5 \text{HO}_2 + .5 \text{HOCH}_2\text{CO}_3 + \text{CO} + 1.5 \text{LCARBON}$                                               | $\text{jx}(\text{ip\_MVK})$                     | Rickard (2009)* and Pascoe |
| J4418 | TrGCJ  | $\text{CO}_2\text{H}_3\text{CHO} + h\nu \rightarrow \text{MGLYOX} + \text{CO} + \text{HO}_2 + \text{HO}_2$                                                                     | $\text{jx}(\text{ip\_HOCH}_2\text{CHO})$        | Rickard (2009)* and Pascoe |
| J4419 | TrGCJ  | $\text{HO}_2\text{C}_3\text{C}_4 + h\nu \rightarrow \text{CH}_3\text{C}(\text{O})\text{OO} + \text{HOCH}_2\text{CHO} + \text{HO}_2$                                            | J_ACETOL                                        | Rickard (2009)* and Pascoe |
| J4420 | TrGCJ  | $\text{BIACETOH} + h\nu \rightarrow \text{CH}_3\text{C}(\text{O})\text{OO} + \text{HOCH}_2\text{CO}_3$                                                                         | $2.15 * \text{jx}(\text{ip\_MGLYOX})$           | see note                   |
| J4502 | TrGCJ  | $\text{LISOPACOOH} + h\nu \rightarrow \text{LHC}_4\text{ACCHO} + \text{HO}_2 + \text{OH}$                                                                                      | $\text{jx}(\text{ip\_CH300H})$                  | Rickard (2009)* and Pascoe |
| J4503 | TrGNCJ | $\text{LISOPACNO}_3 + h\nu \rightarrow \text{LHC}_4\text{ACCHO} + \text{HO}_2 + \text{NO}_2$                                                                                   | $0.59 * \text{J\_IC3H7N03}$                     | see note                   |
| J4504 | TrGCJ  | $\text{ISOPBOOH} + h\nu \rightarrow .75 \text{MVK} + .25 \text{MVKOH} + .75 \text{HCHO} + .75 \text{HO}_2 + .25 \text{CH}_3\text{O}_2 + \text{OH}$                             | $\text{jx}(\text{ip\_CH300H})$                  | Rickard (2009)* and Pascoe |
| J4505 | TrGNCJ | $\text{ISOPBNO}_3 + h\nu \rightarrow .75 \text{MVK} + .25 \text{MVKOH} + .75 \text{HCHO} + .75 \text{HO}_2 + .25 \text{CH}_3\text{O}_2 + \text{NO}_2$                          | $2.84 * \text{J\_IC3H7N03}$                     | see note                   |
| J4506 | TrGCJ  | $\text{ISOPDOOH} + h\nu \rightarrow \text{MACR} + \text{HCHO} + \text{HO}_2 + \text{OH}$                                                                                       | $\text{jx}(\text{ip\_CH300H})$                  | Rickard (2009)* and Pascoe |
| J4507 | TrGNCJ | $\text{ISOPDNO}_3 + h\nu \rightarrow \text{MACR} + \text{HCHO} + \text{HO}_2 + \text{NO}_2$                                                                                    | J_IC3H7N03                                      | see note                   |
| J4508 | TrGNCJ | $\text{NISOPOOH} + h\nu \rightarrow \text{NC}_4\text{CHO} + \text{HO}_2 + \text{OH}$                                                                                           | $\text{jx}(\text{ip\_CH300H})$                  | Rickard (2009)* and Pascoe |
| J4509 | TrGNCJ | $\text{NC}_4\text{CHO} + h\nu \rightarrow \text{NOA} + 2 \text{CO} + 2 \text{HO}_2$                                                                                            | $\text{jx}(\text{ip\_MACR})$                    | see note                   |

Table 2: Photolysis reactions (... continued)

| #      | labels    | reaction                                                                                                                                                                                          | rate coefficient                         | reference                   |
|--------|-----------|---------------------------------------------------------------------------------------------------------------------------------------------------------------------------------------------------|------------------------------------------|-----------------------------|
| J4510  | TrGNcJ    | $\text{LNISOOH} + h\nu \rightarrow \text{NOA} + \text{OH} + .5 \text{GLYOX} + .5 \text{CO} + \text{HO}_2 + .5 \text{CO}_2$                                                                        | $\text{jx(ip\_CH300H)}$                  | Taraborrelli et al. (2009)* |
| J4511  | TrGCJ     | $\text{LHC4ACCHO} + h\nu \rightarrow .5 \text{LHC4ACCO3} + .25 \text{CH}_3\text{COCH}_2\text{OH} + .25 \text{HOCH}_2\text{CHO} + .25 \text{CH}_3\text{C(O)OO} + .75 \text{CO} + 1.25 \text{HO}_2$ | $\text{jx(ip\_MACR)}$                    | Rickard and Pascoe (2009)*  |
| J4512  | TrGCJ     | $\text{LC578OOH} + h\nu \rightarrow .5 \text{CH}_3\text{COCH}_2\text{OH} + .5 \text{MGLYOX} + .5 \text{GLYOX} + .5 \text{HOCH}_2\text{CHO} + \text{HO}_2 + \text{OH}$                             | $\text{jx(ip\_CH300H)}$                  | Taraborrelli et al. (2009)* |
| J4513  | TrGCJ     | $\text{LHC4ACCO3H} + h\nu \rightarrow .5 \text{CH}_3\text{COCH}_2\text{OH} + .5 \text{HOCH}_2\text{CHO} + .5 \text{CH}_3\text{C(O)OO} + .5 \text{CO} + .5 \text{HO}_2 + \text{OH} + \text{CO}_2$  | $\text{jx(ip\_CH300H)}$                  | Rickard and Pascoe (2009)*  |
| J4514  | TrGNcJ    | $\text{LC5PAN1719} + h\nu \rightarrow .5 \text{MACROH} + .5 \text{HO12CO3C4} + \text{CO} + \text{NO}_2$                                                                                           | $\text{jx(ip\_PAN)}$                     | see note                    |
| J4515  | TrGCJ     | $\text{HCOC5} + h\nu \rightarrow \text{CH}_3\text{C(O)OO} + \text{HCHO} + \text{HOCH}_2\text{CO}_3$                                                                                               | $0.5*\text{jx(ip\_MVK)}$                 | see note                    |
| J4516  | TrGCJ     | $\text{C59OOH} + h\nu \rightarrow \text{CH}_3\text{COCH}_2\text{OH} + \text{HOCH}_2\text{CO}_3 + \text{OH}$                                                                                       | $\text{J\_ACETOL}+\text{jx(ip\_CH300H)}$ | Rickard and Pascoe (2009)*  |
| J6000  | StTrGClJ  | $\text{Cl}_2 + h\nu \rightarrow \text{Cl} + \text{Cl}$                                                                                                                                            | $\text{jx(ip\_Cl2)}$                     | see note                    |
| J6100  | StTrGClJ  | $\text{Cl}_2\text{O}_2 + h\nu \rightarrow 2 \text{Cl}$                                                                                                                                            | $1.4*\text{jx(ip\_Cl2O2)}$               | see note                    |
| J6101  | StTrGClJ  | $\text{OClO} + h\nu \rightarrow \text{ClO} + \text{O}(^3\text{P})$                                                                                                                                | $\text{jx(ip\_OClO)}$                    | see note                    |
| J6200  | StGClJ    | $\text{HCl} + h\nu \rightarrow \text{Cl} + \text{H}$                                                                                                                                              | $\text{jx(ip\_HCl)}$                     | see note                    |
| J6201  | StTrGClJ  | $\text{HOCl} + h\nu \rightarrow \text{OH} + \text{Cl}$                                                                                                                                            | $\text{jx(ip\_HOCl)}$                    | see note                    |
| J6300  | TrGNClJ   | $\text{ClNO}_2 + h\nu \rightarrow \text{Cl} + \text{NO}_2$                                                                                                                                        | $\text{jx(ip\_ClNO2)}$                   | see note                    |
| J6301a | StTrGNClJ | $\text{ClNO}_3 + h\nu \rightarrow \text{Cl} + \text{NO}_3$                                                                                                                                        | $\text{jx(ip\_ClNO3)}$                   | see note                    |
| J6301b | StTrGNClJ | $\text{ClNO}_3 + h\nu \rightarrow \text{ClO} + \text{NO}_2$                                                                                                                                       | $\text{jx(ip\_ClON02)}$                  | see note                    |
| J6400  | StGClJ    | $\text{CH}_3\text{Cl} + h\nu \rightarrow \text{Cl} + \text{CH}_3\text{O}_2$                                                                                                                       | $\text{jx(ip\_CH3Cl)}$                   | see note                    |
| J6401  | StGClJ    | $\text{CCl}_4 + h\nu \rightarrow 4 \text{Cl}$                                                                                                                                                     | $\text{jx(ip\_CCl4)}$                    | see note                    |
| J6402  | StGCClJ   | $\text{CH}_3\text{CCl}_3 + h\nu \rightarrow 3 \text{Cl}$                                                                                                                                          | $\text{jx(ip\_CH3CCl3)}$                 | see note                    |
| J6500  | StGFClJ   | $\text{CFCl}_3 + h\nu \rightarrow 3 \text{Cl}$                                                                                                                                                    | $\text{jx(ip\_CFCl3)}$                   | see note                    |
| J6501  | StGFClJ   | $\text{CF}_2\text{Cl}_2 + h\nu \rightarrow 2 \text{Cl}$                                                                                                                                           | $\text{jx(ip\_CF2Cl2)}$                  | see note                    |
| J7000  | StTrGBrJ  | $\text{Br}_2 + h\nu \rightarrow \text{Br} + \text{Br}$                                                                                                                                            | $\text{jx(ip\_Br2)}$                     | see note                    |
| J7100  | StTrGBrJ  | $\text{BrO} + h\nu \rightarrow \text{Br} + \text{O}(^3\text{P})$                                                                                                                                  | $\text{jx(ip\_BrO)}$                     | see note                    |
| J7200  | StTrGBrJ  | $\text{HOBr} + h\nu \rightarrow \text{Br} + \text{OH}$                                                                                                                                            | $\text{jx(ip\_HOBr)}$                    | see note                    |
| J7300  | TrGNBrJ   | $\text{BrNO}_2 + h\nu \rightarrow \text{Br} + \text{NO}_2$                                                                                                                                        | $\text{jx(ip\_BrNO2)}$                   | see note                    |
| J7301  | StTrGNBrJ | $\text{BrNO}_3 + h\nu \rightarrow 0.29 \text{Br} + 0.29 \text{NO}_3 + 0.71 \text{BrO} + 0.71 \text{NO}_2$                                                                                         | $\text{jx(ip\_BrNO3)}$                   | see note                    |
| J7400  | StGBrJ    | $\text{CH}_3\text{Br} + h\nu \rightarrow \text{Br} + \text{CH}_3\text{O}_2$                                                                                                                       | $\text{jx(ip\_CH3Br)}$                   | see note                    |
| J7401  | TrGBrJ    | $\text{CH}_2\text{Br}_2 + h\nu \rightarrow 2 \text{Br}$                                                                                                                                           | $\text{jx(ip\_CH2Br2)}$                  | see note                    |
| J7402  | TrGBrJ    | $\text{CHBr}_3 + h\nu \rightarrow 3 \text{Br}$                                                                                                                                                    | $\text{jx(ip\_CHBr3)}$                   | see note                    |
| J7500  | StGFBrJ   | $\text{CF}_3\text{Br} + h\nu \rightarrow \text{Br}$                                                                                                                                               | $\text{jx(ip\_CF3Br)}$                   | see note                    |

Table 2: Photolysis reactions (... continued)

| #           | labels     | reaction                                                                                                            | rate coefficient                                            | reference |
|-------------|------------|---------------------------------------------------------------------------------------------------------------------|-------------------------------------------------------------|-----------|
| J7600       | StTrGClBrJ | $\text{BrCl} + h\nu \rightarrow \text{Br} + \text{Cl}$                                                              | $\text{jx}(\text{ip\_BrCl})$                                | see note  |
| J7601       | StGFBrJ    | $\text{CF}_2\text{ClBr} + h\nu \rightarrow \text{Br} + \text{Cl}$                                                   | $\text{jx}(\text{ip\_CF2ClBr})$                             | see note  |
| J7602       | TrGClBrJ   | $\text{CH}_2\text{ClBr} + h\nu \rightarrow \text{Br} + \text{Cl}$                                                   | $\text{jx}(\text{ip\_CH2ClBr})$                             | see note  |
| J7603       | TrGClBrJ   | $\text{CHCl}_2\text{Br} + h\nu \rightarrow \text{Br} + 2 \text{Cl}$                                                 | $\text{jx}(\text{ip\_CHCl2Br})$                             | see note  |
| J7604       | TrGClBrJ   | $\text{CHClBr}_2 + h\nu \rightarrow 2 \text{Br} + \text{Cl}$                                                        | $\text{jx}(\text{ip\_CHClBr2})$                             | see note  |
| J8000       | TrGIJ      | $\text{I}_2 + h\nu \rightarrow \text{I} + \text{I}$                                                                 | $\text{jx}(\text{ip\_I2})$                                  | see note  |
| J8100       | TrGIJ      | $\text{IO} + h\nu \rightarrow \text{I} + \text{O}({}^3\text{P})$                                                    | $\text{jx}(\text{ip\_IO})$                                  | see note  |
| J8200       | TrGIJ      | $\text{HOI} + h\nu \rightarrow \text{I} + \text{OH}$                                                                | $\text{jx}(\text{ip\_HOI})$                                 | see note  |
| J8300       | TrGNIJ     | $\text{INO}_2 + h\nu \rightarrow \text{I} + \text{NO}_2$                                                            | $\text{jx}(\text{ip\_INO2})$                                | see note  |
| J8301       | TrGNIJ     | $\text{INO}_3 + h\nu \rightarrow \text{I} + \text{NO}_3$                                                            | $\text{jx}(\text{ip\_INO3})$                                | see note  |
| J8400       | TrGIJ      | $\text{CH}_2\text{I}_2 + h\nu \rightarrow 2 \text{I} + 2 \text{HO}_2 + \text{CO}$                                   | $\text{jx}(\text{ip\_CH2I2})$                               | see note  |
| J8401       | TrGIJ      | $\text{CH}_3\text{I} + h\nu \rightarrow \text{I} + \text{CH}_3\text{O}_2$                                           | $\text{jx}(\text{ip\_CH3I})$                                | see note  |
| J8402       | TrGIJ      | $\text{C}_3\text{H}_7\text{I} + h\nu \rightarrow \text{I} + \text{CH}_3\text{O}_2$                                  | $\text{jx}(\text{ip\_C3H7I})$                               | see note  |
| J8403       | TrGIClJ    | $\text{CH}_2\text{ClI} + h\nu \rightarrow \text{I} + \text{Cl} + 2 \text{HO}_2 + \text{CO}$                         | $\text{jx}(\text{ip\_CH2ClI})$                              | see note  |
| J8600       | TrGCIIJ    | $\text{ICl} + h\nu \rightarrow \text{I} + \text{Cl}$                                                                | $\text{jx}(\text{ip\_ICl})$                                 | see note  |
| J8700       | TrGBrIJ    | $\text{IBr} + h\nu \rightarrow \text{I} + \text{Br}$                                                                | $\text{jx}(\text{ip\_IBr})$                                 | see note  |
| PH3200_a01  | TrAa01NJ   | $\text{NO}_3^-(\text{aq}) + h\nu \rightarrow \text{NO}_2(\text{aq}) + \text{OH}(\text{aq}) - \text{H}^+(\text{aq})$ | $\text{xaer}(01)*\text{jx}(\text{ip\_NO2}) * 1.4\text{E}-4$ | see note  |
| PH10200_a01 | TrAa01HgJ  | $\text{Hg}(\text{OH})_2(\text{aq}) + h\nu \rightarrow \text{Hg}(\text{aq})$                                         | $\text{xaer}(01)*6\text{E}-5*\text{jx}(\text{ip\_NO2})$     | see note  |

\*Notes:

J-values are calculated with an external module and then supplied to the MECCA chemistry.

Values that originate from the Master Chemical Mechanism (MCM) by Rickard and Pascoe (2009) are translated according in the following way:

$\text{J}(11) \rightarrow \text{jx}(\text{ip\_COH2})$   
 $\text{J}(12) \rightarrow \text{jx}(\text{ip\_CHOH})$   
 $\text{J}(15) \rightarrow \text{jx}(\text{ip\_HOCH2CHO})$   
 $\text{J}(18) \rightarrow \text{jx}(\text{ip\_MACR})$   
 $\text{J}(22) \rightarrow \text{jx}(\text{ip\_ACETOL})$   
 $\text{J}(23)+\text{J}(24) \rightarrow \text{jx}(\text{ip\_MVK})$   
 $\text{J}(31)+\text{J}(32)+\text{J}(33) \rightarrow \text{jx}(\text{ip\_GLYOX})$   
 $\text{J}(34) \rightarrow \text{jx}(\text{ip\_MGLYOX})$   
 $\text{J}(41) \rightarrow \text{jx}(\text{ip\_CH3OOH})$

$\text{J}(53) \rightarrow \text{J}(\text{iC}_3\text{H}_7\text{ONO}_2)$   
 $\text{J}(54) \rightarrow \text{J}(\text{iC}_3\text{H}_7\text{ONO}_2)$   
 $\text{J}(55) \rightarrow \text{J}(\text{iC}_3\text{H}_7\text{ONO}_2)$   
 $\text{J}(56)+\text{J}(57) \rightarrow \text{jx}(\text{ip\_NOA})$

J4207: It is assumed that J(PHAN) is the same as J(PAN).

J4212: It is assumed that J(ETHOHNO3) is the same as J( $\text{iC}_3\text{H}_7\text{ONO}_2$ ).

J4302: Following von Kuhlmann et al. (2003), we use  $\text{J}(\text{CH}_3\text{COCH}_2\text{OH}) = 0.11*\text{jx}(\text{ip\_CHOH})$ . As an additional factor, the quantum yield of 0.65 is taken from Orlando et al. (1999).

J4306: Following von Kuhlmann et al. (2003), we use  $\text{J}(\text{iC}_3\text{H}_7\text{ONO}_2) = 3.7*\text{jx}(\text{ip\_PAN})$ .

J4307: NOA contains the chromophores of both  $\text{CH}_3\text{COCH}_3$  and a nitrate group. It is assumed here that the J values are additive, i.e.:  $\text{J}(\text{NOA}) = \text{J}(\text{CH}_3\text{COCH}_3) + \text{J}(\text{iC}_3\text{H}_7\text{ONO}_2)$ .

J4406: It is assumed that J(LC4H9NO3) is the same as J( $\text{iC}_3\text{H}_7\text{ONO}_2$ ).

J4407: It is assumed that J(MPAN) is the same as J(PAN).

J4405: It is assumed that J(BIACET) is 2.15 times larger than J(MGLYOX), consistent with the photolysis rate coefficients used in the MCM (Rickard and Pascoe, 2009).

J4413: It is assumed that J(MACROOH) is 2.77 times larger than J( $\text{HOCH}_2\text{CHO}$ ), consistent with the pho-

tolysis rate coefficients used in the MCM (Rickard and Pascoe, 2009).

J4414: It is assumed that  $J(\text{MACROH})$  is 2.77 times larger than  $J(\text{HOCH}_2\text{CHO})$ , consistent with the photolysis rate coefficients used in the MCM (Rickard and Pascoe, 2009).

J4420: It is assumed that  $J(\text{BIACETOH})$  is 2.15 times larger than  $J(\text{MGLYOX})$ , consistent with the photolysis rate coefficients used in the MCM (Rickard and Pascoe, 2009).

J4503: It is assumed that  $J(\text{LISOPACNO}_3) = 0.59 \times J(\text{iC}_3\text{H}_7\text{ONO}_2)$ , consistent with the photolysis rate coefficients used in the MCM (Rickard and Pascoe, 2009).

J4505: It is assumed that  $J(\text{ISOPBNO}_3) = 2.84 \times J(\text{iC}_3\text{H}_7\text{ONO}_2)$ , consistent with the photolysis rate coefficients used in the MCM (Rickard and Pascoe, 2009).

J4509: It is assumed that  $J(\text{NC}_4\text{CHO})$  is the same as  $J(\text{MACR})$ .

J4514: It is assumed that  $J(\text{LC5PAN1719})$  is the same as  $J(\text{PAN})$ .

J4515: Consistent with the MCM (Rickard and Pascoe, 2009), we assume that  $J(\text{HCOC5})$  is half as large as  $J(\text{MVK})$ .

J6100: Stimpfle et al. (2004) claim that the combination of absorption cross sections from Burkholder

et al. (1990) and the  $\text{Cl}_2\text{O}_2$  formation rate coefficient by Sander et al. (2003) can approximately reproduce the observed  $\text{Cl}_2\text{O}_2/\text{ClO}$  ratios and ozone depletion. They give an almost zenith-angle independent ratio of 1.4 for Burkholder et al. (1990) to Sander et al. (2003) J-values. The IUPAC recommendation for the  $\text{Cl}_2\text{O}_2$  formation rate is about 5 to 15 % less than the value by Sander et al. (2003) but more than 20 % larger than the value by Sander et al. (2000). The J-values by Burkholder et al. (1990) are within the uncertainty range of the IUPAC recommendation.

J7301: The quantum yields are from Sander et al. (2003).



Table 3: Henry’s law coefficients

| substance                                    | $k_H^\ominus$<br>M/atm               | $-\Delta_{\text{soln}}H/R$<br>K | reference                       |
|----------------------------------------------|--------------------------------------|---------------------------------|---------------------------------|
| O <sub>2</sub>                               | $1.3 \times 10^{-3}$                 | 1500.                           | Wilhelm et al. (1977)           |
| O <sub>3</sub>                               | $1.2 \times 10^{-2}$                 | 2560.                           | Chameides (1984)                |
| OH                                           | $3.0 \times 10^1$                    | 4300.                           | Hanson et al. (1992)            |
| HO <sub>2</sub>                              | $3.9 \times 10^3$                    | 5900.                           | Hanson et al. (1992)            |
| H <sub>2</sub> O <sub>2</sub>                | $1. \times 10^5$                     | 6338.                           | Lind and Kok (1994)             |
| NH <sub>3</sub>                              | 58.                                  | 4085.                           | Chameides (1984)                |
| NO                                           | $1.9 \times 10^{-3}$                 | 1480.                           | Schwartz and White (1981)       |
| NO <sub>2</sub>                              | $7.0 \times 10^{-3}$                 | 2500.                           | Lee and Schwartz (1981)*        |
| NO <sub>3</sub>                              | 2.                                   | 2000.                           | Thomas et al. (1993)            |
| N <sub>2</sub> O <sub>5</sub>                | BIG                                  | 0.                              | see note                        |
| HONO                                         | $4.9 \times 10^1$                    | 4780.                           | Schwartz and White (1981)       |
| HNO <sub>3</sub>                             | $2.45 \times 10^6 / 1.5 \times 10^1$ | 8694.                           | Brimblecombe and Clegg (1989)*  |
| HNO <sub>4</sub>                             | $1.2 \times 10^4$                    | 6900.                           | Régimbal and Mozurkewich (1997) |
| CH <sub>3</sub> O <sub>2</sub>               | 6.                                   | 5600.                           | Jacob (1986)*                   |
| CH <sub>3</sub> OOH                          | $3.0 \times 10^2$                    | 5322.                           | Lind and Kok (1994)             |
| CO <sub>2</sub>                              | $3.1 \times 10^{-2}$                 | 2423.                           | Chameides (1984)                |
| HCHO                                         | $7.0 \times 10^3$                    | 6425.                           | Chameides (1984)                |
| HCOOH                                        | $3.7 \times 10^3$                    | 5700.                           | Chameides (1984)                |
| CH <sub>3</sub> COOH                         | $4.1 \times 10^3$                    | 6200.                           | Sander et al. (2006)            |
| PAN                                          | 2.8                                  | 5730.                           | Sander et al. (2006)            |
| C <sub>2</sub> H <sub>5</sub> O <sub>2</sub> | 6.                                   | 5600.                           | see note                        |
| CH <sub>3</sub> CHO                          | $1.29 \times 10^1$                   | 5890.                           | Sander et al. (2006)            |
| CH <sub>3</sub> COCH <sub>3</sub>            | 28.1                                 | 5050.                           | Sander et al. (2006)            |
| Cl <sub>2</sub>                              | $9.2 \times 10^{-2}$                 | 2081.                           | Bartlett and Margerum (1999)    |
| HCl                                          | 2./1.7                               | 9001.                           | Brimblecombe and Clegg (1989)   |
| HOCl                                         | $6.7 \times 10^2$                    | 5862.                           | Huthwelker et al. (1995)        |
| ClNO <sub>3</sub>                            | BIG                                  | 0.                              | see note                        |
| Br <sub>2</sub>                              | $7.7 \times 10^{-1}$                 | 3837.                           | Bartlett and Margerum (1999)    |
| HBr                                          | 1.3                                  | 10239.                          | Brimblecombe and Clegg (1989)*  |
| HOBr                                         | $9.3 \times 10^1$                    | 5862.                           | Vogt et al. (1996)*             |
| BrNO <sub>3</sub>                            | BIG                                  | 0.                              | see note                        |
| BrCl                                         | $9.4 \times 10^{-1}$                 | 5600.                           | Bartlett and Margerum (1999)    |
| I <sub>2</sub>                               | 3.                                   | 4431.                           | Palmer et al. (1985)            |

Table 3: Henry’s law coefficients (... continued)

| substance                         | $k_{\text{H}}^{\ominus}$<br>M/atm | $-\frac{\Delta_{\text{soln}}H}{R}$<br>K | reference                     |
|-----------------------------------|-----------------------------------|-----------------------------------------|-------------------------------|
| IO                                | $4.5 \times 10^2$                 | 5862.                                   | see note                      |
| OIO                               | BIG                               | 0.                                      | see note                      |
| I <sub>2</sub> O <sub>2</sub>     | BIG                               | 0.                                      | see note                      |
| HI                                | BIG                               | 0.                                      | see note                      |
| HOI                               | $4.5 \times 10^2$                 | 5862.                                   | Chatfield and Crutzen (1990)* |
| HIO <sub>3</sub>                  | BIG                               | 0.                                      | see note                      |
| INO <sub>2</sub>                  | BIG                               | 0.                                      | see note                      |
| INO <sub>3</sub>                  | BIG                               | 0.                                      | see note                      |
| ICl                               | $1.1 \times 10^2$                 | 5600.                                   | see note                      |
| IBr                               | $2.4 \times 10^1$                 | 5600.                                   | see note                      |
| SO <sub>2</sub>                   | 1.2                               | 3120.                                   | Chameides (1984)              |
| H <sub>2</sub> SO <sub>4</sub>    | $1. \times 10^{11}$               | 0.                                      | see note                      |
| CH <sub>3</sub> SO <sub>3</sub> H | BIG                               | 0.                                      | see note                      |
| DMS                               | $5.4 \times 10^{-1}$              | 3500.                                   | Staudinger and Roberts (2001) |
| DMSO                              | $5. \times 10^4$                  | 6425.                                   | De Bruyn et al. (1994)*       |
| Hg                                | 0.13                              | 0.                                      | Schroeder and Munthe (1998)   |
| HgO                               | $3.2 \times 10^6$                 | 0.                                      | Shon et al. (2005)            |
| HgCl <sub>2</sub>                 | $2.4 \times 10^7$                 | 0.                                      | Shon et al. (2005)            |
| HgBr <sub>2</sub>                 | $2.4 \times 10^7$                 | 0.                                      | see note                      |
| ClHgBr                            | $2.4 \times 10^7$                 | 0.                                      | see note                      |
| BrHgOBr                           | $2.4 \times 10^7$                 | 0.                                      | see note                      |
| ClHgOBr                           | $2.4 \times 10^7$                 | 0.                                      | see note                      |

\*Notes:

The value “BIG” corresponds to virtually infinite solubility which is represented in the model using a very large but arbitrary number.

The temperature dependence of the Henry constants is:

$$K_{\text{H}} = K_{\text{H}}^{\ominus} \times \exp\left(\frac{-\Delta_{\text{soln}}H}{R} \left(\frac{1}{T} - \frac{1}{T^{\ominus}}\right)\right)$$

where  $\Delta_{\text{soln}}H$  = molar enthalpy of dissolution [J/mol] and  $R = 8.314$  J/(molK).

NO<sub>2</sub>: The temperature dependence is from Chameides (1984).

HNO<sub>3</sub>: Calculated using the acidity constant from Davis and de Bruin (1964).

CH<sub>3</sub>O<sub>2</sub>: This value was estimated by Jacob (1986).

C<sub>2</sub>H<sub>5</sub>O<sub>2</sub>: Assumed to be the same as  $K_{\text{H}}(\text{CH}_3\text{O}_2)$ .

HBr: Calculated using the acidity constant from Lax (1969).

HOBr: This value was estimated by Vogt et al. (1996).

IO: Assumed to be the same as  $K_{\text{H}}(\text{HOI})$ .

HOI: Lower limit.

ICl: Calculated using thermodynamic data from Wagman et al. (1982).

IBr: Calculated using thermodynamic data from Wagman et al. (1982).

H<sub>2</sub>SO<sub>4</sub>: To account for the very high Henry’s law coefficient of H<sub>2</sub>SO<sub>4</sub>, a very high value was chosen arbitrarily.

DMSO: Lower limit cited from another reference.

HgBr<sub>2</sub>: Assumed to be the same as for HgCl<sub>2</sub>.

ClHgBr: Assumed to be the same as for HgCl<sub>2</sub>.

BrHgOBr: Assumed to be the same as for HgCl<sub>2</sub>.

ClHgOBr: Assumed to be the same as for HgCl<sub>2</sub>.

Table 4: Accommodation coefficients

| substance                                    | $\alpha^\ominus$      | $\frac{-\Delta_{\text{obs}}H/R}{K}$ | reference                     |
|----------------------------------------------|-----------------------|-------------------------------------|-------------------------------|
| O <sub>2</sub>                               | 0.01                  | 2000.                               | see note                      |
| O <sub>3</sub>                               | 0.002                 | (default)                           | DeMore et al. (1997)*         |
| OH                                           | 0.01                  | (default)                           | Takami et al. (1998)*         |
| HO <sub>2</sub>                              | 0.5                   | (default)                           | Thornton and Abbatt (2005)    |
| H <sub>2</sub> O <sub>2</sub>                | 0.077                 | 3127.                               | Worsnop et al. (1989)         |
| NH <sub>3</sub>                              | 0.06                  | (default)                           | DeMore et al. (1997)*         |
| NO                                           | $5.0 \times 10^{-5}$  | (default)                           | Saastad et al. (1993)*        |
| NO <sub>2</sub>                              | 0.0015                | (default)                           | Ponche et al. (1993)*         |
| NO <sub>3</sub>                              | 0.04                  | (default)                           | Rudich et al. (1996)*         |
| N <sub>2</sub> O <sub>5</sub>                | (default)             | (default)                           | DeMore et al. (1997)*         |
| HONO                                         | 0.04                  | (default)                           | DeMore et al. (1997)*         |
| HNO <sub>3</sub>                             | 0.5                   | (default)                           | Abbatt and Waschewsky (1998)* |
| HNO <sub>4</sub>                             | (default)             | (default)                           | DeMore et al. (1997)*         |
| CH <sub>3</sub> O <sub>2</sub>               | 0.01                  | 2000.                               | see note                      |
| CH <sub>3</sub> OOH                          | 0.0046                | 3273.                               | Magi et al. (1997)            |
| CO <sub>2</sub>                              | 0.01                  | 2000.                               | see note                      |
| HCHO                                         | 0.04                  | (default)                           | DeMore et al. (1997)*         |
| HCOOH                                        | 0.014                 | 3978.                               | DeMore et al. (1997)          |
| CH <sub>3</sub> COOH                         | $2.0 \times 10^{-2}$  | 4079.                               | Davidovits et al. (1995)      |
| PAN                                          | (default)             | (default)                           | see note                      |
| C <sub>2</sub> H <sub>5</sub> O <sub>2</sub> | (default)             | (default)                           | see note                      |
| CH <sub>3</sub> CHO                          | $3.0 \times 10^{-2}$  | (default)                           | see note                      |
| CH <sub>3</sub> COCH <sub>3</sub>            | $3.72 \times 10^{-3}$ | 6395.                               | Davidovits et al. (1995)      |
| Cl <sub>2</sub>                              | 0.038                 | 6546.                               | Hu et al. (1995)              |
| HCl                                          | 0.074                 | 3072.                               | Schweitzer et al. (2000)*     |
| HOCl                                         | 0.5                   | (default)                           | see note                      |
| ClNO <sub>3</sub>                            | 0.108                 | (default)                           | Deiber et al. (2004)*         |
| Br <sub>2</sub>                              | 0.038                 | 6546.                               | Hu et al. (1995)              |
| HBr                                          | 0.032                 | 3940.                               | Schweitzer et al. (2000)*     |
| HOBr                                         | 0.5                   | (default)                           | Abbatt and Waschewsky (1998)* |
| BrNO <sub>3</sub>                            | 0.063                 | (default)                           | Deiber et al. (2004)*         |
| BrCl                                         | 0.38                  | 6546.                               | see note                      |
| I <sub>2</sub>                               | 0.01                  | 2000.                               | see note                      |
| IO                                           | 0.5                   | 2000.                               | see note                      |

Table 4: Accommodation coefficients (... continued)

| substance                         | $\alpha^\ominus$ | $\frac{-\Delta_{\text{obs}}H/R}{\text{K}}$ | reference                 |
|-----------------------------------|------------------|--------------------------------------------|---------------------------|
| OIO                               | 0.01             | (default)                                  | see note                  |
| I <sub>2</sub> O <sub>2</sub>     | (default)        | 2000.                                      | see note                  |
| HI                                | 0.036            | 4130.                                      | Schweitzer et al. (2000)* |
| HOI                               | 0.5              | (default)                                  | see note                  |
| HIO <sub>3</sub>                  | 0.01             | (default)                                  | see note                  |
| INO <sub>2</sub>                  | (default)        | 2000.                                      | see note                  |
| INO <sub>3</sub>                  | (default)        | 2000.                                      | see note                  |
| ICl                               | 0.018            | 2000.                                      | Braban et al. (2007)      |
| IBr                               | 0.018            | 2000.                                      | see note                  |
| SO <sub>2</sub>                   | 0.11             | (default)                                  | DeMore et al. (1997)      |
| H <sub>2</sub> SO <sub>4</sub>    | 0.65             | (default)                                  | Pöschl et al. (1998)*     |
| CH <sub>3</sub> SO <sub>3</sub> H | 0.076            | 1762.                                      | De Bruyn et al. (1994)    |
| DMS                               | (default)        | (default)                                  | see note                  |
| DMSO                              | 0.048            | 2578.                                      | De Bruyn et al. (1994)    |
| Hg                                | (default)        | (default)                                  | see note                  |
| HgO                               | (default)        | (default)                                  | see note                  |
| HgCl <sub>2</sub>                 | (default)        | (default)                                  | see note                  |
| HgBr <sub>2</sub>                 | (default)        | (default)                                  | see note                  |
| ClHgBr                            | (default)        | (default)                                  | see note                  |
| BrHgOBr                           | (default)        | (default)                                  | see note                  |
| ClHgOBr                           | (default)        | (default)                                  | see note                  |

\*Notes:

If no data are available, the following default values are used:

$$\alpha^\ominus = 0.1$$

$$-\Delta_{\text{obs}}H/R = 0 \text{ K}$$

The temperature dependence of the accommodation coefficients is given by (Jayne et al., 1991):

$$\frac{\alpha}{1-\alpha} = \exp\left(\frac{-\Delta_{\text{obs}}G}{RT}\right)$$

$$= \exp\left(\frac{-\Delta_{\text{obs}}H}{RT} + \frac{\Delta_{\text{obs}}S}{R}\right)$$

where  $\Delta_{\text{obs}}G$  is the Gibbs free energy barrier of the transition state toward solution (Jayne et al., 1991), and  $\Delta_{\text{obs}}H$  and  $\Delta_{\text{obs}}S$  are the corresponding enthalpy and entropy, respectively. The equation can be rearranged to:

$$\ln\left(\frac{\alpha}{1-\alpha}\right) = \frac{-\Delta_{\text{obs}}H}{R} \times \frac{1}{T} + \frac{-\Delta_{\text{obs}}S}{R}$$

and further:

$$d \ln\left(\frac{\alpha}{1-\alpha}\right) / d\left(\frac{1}{T}\right) = \frac{-\Delta_{\text{obs}}H}{R}$$

O<sub>2</sub>: Estimate.

O<sub>3</sub>: Value measured at 292 K.

OH: Value measured at 293 K.

NH<sub>3</sub>: Value measured at 295 K.

NO: Value measured between 193 and 243 K.

NO<sub>2</sub>: Value measured at 298 K.

NO<sub>3</sub>: Value is a lower limit, measured at 273 K.

N<sub>2</sub>O<sub>5</sub>: Value for sulfuric acid, measured between 195 and 300 K.

HONO: Value measured between 247 and 297 K.

HNO<sub>3</sub>: Value measured at room temperature. Abbatt and Waschewsky (1998) say  $\gamma > 0.2$ . Here  $\alpha = 0.5$  is used.

HNO<sub>4</sub>: Value measured at 200 K for water ice.

CH<sub>3</sub>O<sub>2</sub>: Estimate.

CO<sub>2</sub>: Estimate.

HCHO: Value measured between 260 and 270 K.

PAN: Estimate.

C<sub>2</sub>H<sub>5</sub>O<sub>2</sub>: Estimate.

CH<sub>3</sub>CHO: Using the same estimate as in the CAPRAM 2.4 model ([http://projects.tropos.de/capram/capram\\_24.html](http://projects.tropos.de/capram/capram_24.html)).

HCl: Temperature dependence derived from published data at 2 different temperatures

HOCl: Assumed to be the same as  $\alpha(\text{HOBr})$ .

ClNO<sub>3</sub>: Value measured at 274.5 K.

HBr: Temperature dependence derived from published data at 2 different temperatures

HOBr: Value measured at room temperature. Abbatt and Waschewsky (1998) say  $\gamma > 0.2$ . Here  $\alpha = 0.5$  is used.

BrNO<sub>3</sub>: Value measured at 273 K.

BrCl: Assumed to be the same as  $\alpha(\text{Cl}_2)$ .

I<sub>2</sub>: Estimate.

IO: Estimate.

OIO: Estimate.

I<sub>2</sub>O<sub>2</sub>: Estimate.

HI: Temperature dependence derived from published data at 2 different temperatures

HOI: Assumed to be the same as  $\alpha(\text{HOBr})$ . See also Mössinger and Cox (2001) and Holmes et al. (2001).

HIO<sub>3</sub>: Estimate.

INO<sub>2</sub>: Estimate.

INO<sub>3</sub>: Estimate.

IBr: Assumed to be the same as  $\alpha(\text{ICl})$ .

H<sub>2</sub>SO<sub>4</sub>: Value measured at 303 K.

Hg: Estimate.

HgO: Estimate.

HgCl<sub>2</sub>: Estimate.

HgBr<sub>2</sub>: Estimate.

ClHgBr: Estimate.

BrHgOBr: Estimate.

ClHgOBr: Estimate.

Table 5: Reversible (Henry’s law) equilibria and irreversible (“heterogenous”) uptake

| #          | labels          | reaction                                   | rate coefficient                                     | reference                                   |
|------------|-----------------|--------------------------------------------|------------------------------------------------------|---------------------------------------------|
| H1000f_a01 | TrAa01Sc        | $O_2 \rightarrow O_2(aq)$                  | $k_{\text{exf}}(01, \text{ind}_{O2})$                | see note                                    |
| H1000b_a01 | TrAa01Sc        | $O_2(aq) \rightarrow O_2$                  | $k_{\text{exb}}(01, \text{ind}_{O2})$                | see note                                    |
| H1001f_a01 | TrAa01MblScScm  | $O_3 \rightarrow O_3(aq)$                  | $k_{\text{exf}}(01, \text{ind}_{O3})$                | see note                                    |
| H1001b_a01 | TrAa01MblScScm  | $O_3(aq) \rightarrow O_3$                  | $k_{\text{exb}}(01, \text{ind}_{O3})$                | see note                                    |
| H2100f_a01 | TrAa01Sc        | $OH \rightarrow OH(aq)$                    | $k_{\text{exf}}(01, \text{ind}_{OH})$                | see note                                    |
| H2100b_a01 | TrAa01Sc        | $OH(aq) \rightarrow OH$                    | $k_{\text{exb}}(01, \text{ind}_{OH})$                | see note                                    |
| H2101f_a01 | TrAa01Sc        | $HO_2 \rightarrow HO_2(aq)$                | $k_{\text{exf}}(01, \text{ind}_{HO2})$               | see note                                    |
| H2101b_a01 | TrAa01Sc        | $HO_2(aq) \rightarrow HO_2$                | $k_{\text{exb}}(01, \text{ind}_{HO2})$               | see note                                    |
| H2102f_a01 | TrAa01MblScScm  | $H_2O_2 \rightarrow H_2O_2(aq)$            | $k_{\text{exf}}(01, \text{ind}_{H2O2})$              | see note                                    |
| H2102b_a01 | TrAa01MblScScm  | $H_2O_2(aq) \rightarrow H_2O_2$            | $k_{\text{exb}}(01, \text{ind}_{H2O2})$              | see note                                    |
| H3101f_a01 | TrAa01NSc       | $NO_2 \rightarrow NO_2(aq)$                | $k_{\text{exf}}(01, \text{ind}_{NO2})$               | see note                                    |
| H3101b_a01 | TrAa01NSc       | $NO_2(aq) \rightarrow NO_2$                | $k_{\text{exb}}(01, \text{ind}_{NO2})$               | see note                                    |
| H3102f_a01 | TrAa01NSc       | $NO_3 \rightarrow NO_3(aq)$                | $k_{\text{exf}}(01, \text{ind}_{NO3})$               | see note                                    |
| H3102b_a01 | TrAa01NSc       | $NO_3(aq) \rightarrow NO_3$                | $k_{\text{exb}}(01, \text{ind}_{NO3})$               | see note                                    |
| H3200f_a01 | TrAa01NMblScScm | $NH_3 \rightarrow NH_3(aq)$                | $k_{\text{exf}}(01, \text{ind}_{NH3})$               | see note                                    |
| H3200b_a01 | TrAa01NMblScScm | $NH_3(aq) \rightarrow NH_3$                | $k_{\text{exb}}(01, \text{ind}_{NH3})$               | see note                                    |
| H3201_a01  | TrAa01MblNScScm | $N_2O_5 \rightarrow HNO_3(aq) + HNO_3(aq)$ | $k_{\text{exf}}_{N2O5}(01)*C(\text{ind}_{H2O\_a01})$ | Behnke et al. (1994), Behnke et al. (1997)* |
| H3202f_a01 | TrAa01NSc       | $HONO \rightarrow HONO(aq)$                | $k_{\text{exf}}(01, \text{ind}_{HONO})$              | see note                                    |
| H3202b_a01 | TrAa01NSc       | $HONO(aq) \rightarrow HONO$                | $k_{\text{exb}}(01, \text{ind}_{HONO})$              | see note                                    |
| H3203f_a01 | TrAa01MblNScScm | $HNO_3 \rightarrow HNO_3(aq)$              | $k_{\text{exf}}(01, \text{ind}_{HNO3})$              | see note                                    |
| H3203b_a01 | TrAa01MblNScScm | $HNO_3(aq) \rightarrow HNO_3$              | $k_{\text{exb}}(01, \text{ind}_{HNO3})$              | see note                                    |
| H3204f_a01 | TrAa01NSc       | $HNO_4 \rightarrow HNO_4(aq)$              | $k_{\text{exf}}(01, \text{ind}_{HNO4})$              | see note                                    |
| H3204b_a01 | TrAa01NSc       | $HNO_4(aq) \rightarrow HNO_4$              | $k_{\text{exb}}(01, \text{ind}_{HNO4})$              | see note                                    |
| H4100f_a01 | TrAa01MblScScm  | $CO_2 \rightarrow CO_2(aq)$                | $k_{\text{exf}}(01, \text{ind}_{CO2})$               | see note                                    |
| H4100b_a01 | TrAa01MblScScm  | $CO_2(aq) \rightarrow CO_2$                | $k_{\text{exb}}(01, \text{ind}_{CO2})$               | see note                                    |
| H4101f_a01 | TrAa01ScScm     | $HCHO \rightarrow HCHO(aq)$                | $k_{\text{exf}}(01, \text{ind}_{HCHO})$              | see note                                    |
| H4101b_a01 | TrAa01ScScm     | $HCHO(aq) \rightarrow HCHO$                | $k_{\text{exb}}(01, \text{ind}_{HCHO})$              | see note                                    |
| H4102f_a01 | TrAa01Sc        | $CH_3O_2 \rightarrow CH_3OO(aq)$           | $k_{\text{exf}}(01, \text{ind}_{CH3O2})$             | see note                                    |
| H4102b_a01 | TrAa01Sc        | $CH_3OO(aq) \rightarrow CH_3O_2$           | $k_{\text{exb}}(01, \text{ind}_{CH3O2})$             | see note                                    |
| H4103f_a01 | TrAa01ScScm     | $HCOOH \rightarrow HCOOH(aq)$              | $k_{\text{exf}}(01, \text{ind}_{HCOOH})$             | see note                                    |
| H4103b_a01 | TrAa01ScScm     | $HCOOH(aq) \rightarrow HCOOH$              | $k_{\text{exb}}(01, \text{ind}_{HCOOH})$             | see note                                    |
| H4104f_a01 | TrAa01ScScm     | $CH_3OOH \rightarrow CH_3OOH(aq)$          | $k_{\text{exf}}(01, \text{ind}_{CH3OOH})$            | see note                                    |
| H4104b_a01 | TrAa01ScScm     | $CH_3OOH(aq) \rightarrow CH_3OOH$          | $k_{\text{exb}}(01, \text{ind}_{CH3OOH})$            | see note                                    |

Table 5: Reversible (Henry’s law) equilibria and irreversible (“heterogenous”) uptake

| #          | labels           | reaction                                                                                                    | rate coefficient                                      | reference                                   |
|------------|------------------|-------------------------------------------------------------------------------------------------------------|-------------------------------------------------------|---------------------------------------------|
| H6000f_a01 | TrAa01ClMblSc    | $\text{Cl}_2 \rightarrow \text{Cl}_2(\text{aq})$                                                            | $k_{\text{exf}}(01, \text{ind\_Cl2})$                 | see note                                    |
| H6000b_a01 | TrAa01ClMblSc    | $\text{Cl}_2(\text{aq}) \rightarrow \text{Cl}_2$                                                            | $k_{\text{exb}}(01, \text{ind\_Cl2})$                 | see note                                    |
| H6200f_a01 | TrAa01ClMblScScm | $\text{HCl} \rightarrow \text{HCl}(\text{aq})$                                                              | $k_{\text{exf}}(01, \text{ind\_HCl})$                 | see note                                    |
| H6200b_a01 | TrAa01ClMblScScm | $\text{HCl}(\text{aq}) \rightarrow \text{HCl}$                                                              | $k_{\text{exb}}(01, \text{ind\_HCl})$                 | see note                                    |
| H6201f_a01 | TrAa01ClMblSc    | $\text{HOCl} \rightarrow \text{HOCl}(\text{aq})$                                                            | $k_{\text{exf}}(01, \text{ind\_HOCl})$                | see note                                    |
| H6201b_a01 | TrAa01ClMblSc    | $\text{HOCl}(\text{aq}) \rightarrow \text{HOCl}$                                                            | $k_{\text{exb}}(01, \text{ind\_HOCl})$                | see note                                    |
| H6300_a01  | TrAa01ClMblN     | $\text{N}_2\text{O}_5 + \text{Cl}^-(\text{aq}) \rightarrow \text{ClNO}_2 + \text{NO}_3^-(\text{aq})$        | $k_{\text{exf\_N2O5}}(01) * 5.E2$                     | Behnke et al. (1994), Behnke et al. (1997)* |
| H6301_a01  | TrAa01ClMblN     | $\text{ClNO}_3 \rightarrow \text{HOCl}(\text{aq}) + \text{HNO}_3(\text{aq})$                                | $k_{\text{exf\_ClNO3}}(01) * C(\text{ind\_H2O\_a01})$ | see note                                    |
| H6302_a01  | TrAa01ClMblN     | $\text{ClNO}_3 + \text{Cl}^-(\text{aq}) \rightarrow \text{Cl}_2(\text{aq}) + \text{NO}_3^-(\text{aq})$      | $k_{\text{exf\_ClNO3}}(01) * 5.E2$                    | see note                                    |
| H7000f_a01 | TrAa01BrMblSc    | $\text{Br}_2 \rightarrow \text{Br}_2(\text{aq})$                                                            | $k_{\text{exf}}(01, \text{ind\_Br2})$                 | see note                                    |
| H7000b_a01 | TrAa01BrMblSc    | $\text{Br}_2(\text{aq}) \rightarrow \text{Br}_2$                                                            | $k_{\text{exb}}(01, \text{ind\_Br2})$                 | see note                                    |
| H7200f_a01 | TrAa01BrMblScScm | $\text{HBr} \rightarrow \text{HBr}(\text{aq})$                                                              | $k_{\text{exf}}(01, \text{ind\_HBr})$                 | see note                                    |
| H7200b_a01 | TrAa01BrMblScScm | $\text{HBr}(\text{aq}) \rightarrow \text{HBr}$                                                              | $k_{\text{exb}}(01, \text{ind\_HBr})$                 | see note                                    |
| H7201f_a01 | TrAa01BrMblSc    | $\text{HOBr} \rightarrow \text{HOBr}(\text{aq})$                                                            | $k_{\text{exf}}(01, \text{ind\_HOBr})$                | see note                                    |
| H7201b_a01 | TrAa01BrMblSc    | $\text{HOBr}(\text{aq}) \rightarrow \text{HOBr}$                                                            | $k_{\text{exb}}(01, \text{ind\_HOBr})$                | see note                                    |
| H7300_a01  | TrAa01BrMblN     | $\text{N}_2\text{O}_5 + \text{Br}^-(\text{aq}) \rightarrow \text{BrNO}_2 + \text{NO}_3^-(\text{aq})$        | $k_{\text{exf\_N2O5}}(01) * 3.E5$                     | Behnke et al. (1994), Behnke et al. (1997)* |
| H7301_a01  | TrAa01BrMblN     | $\text{BrNO}_3 \rightarrow \text{HOBr}(\text{aq}) + \text{HNO}_3(\text{aq})$                                | $k_{\text{exf\_BrNO3}}(01) * C(\text{ind\_H2O\_a01})$ | see note                                    |
| H7302_a01  | TrAa01BrMblN     | $\text{BrNO}_3 + \text{Br}^-(\text{aq}) \rightarrow \text{Br}_2(\text{aq}) + \text{NO}_3^-(\text{aq})$      | $k_{\text{exf\_BrNO3}}(01) * 3.E5$                    | see note                                    |
| H7600f_a01 | TrAa01ClBrMblSc  | $\text{BrCl} \rightarrow \text{BrCl}(\text{aq})$                                                            | $k_{\text{exf}}(01, \text{ind\_BrCl})$                | see note                                    |
| H7600b_a01 | TrAa01ClBrMblSc  | $\text{BrCl}(\text{aq}) \rightarrow \text{BrCl}$                                                            | $k_{\text{exb}}(01, \text{ind\_BrCl})$                | see note                                    |
| H7601_a01  | TrAa01ClBrMblN   | $\text{ClNO}_3 + \text{Br}^-(\text{aq}) \rightarrow \text{BrCl}(\text{aq}) + \text{NO}_3^-(\text{aq})$      | $k_{\text{exf\_ClNO3}}(01) * 3.E5$                    | see note                                    |
| H7602_a01  | TrAa01ClBrMblN   | $\text{BrNO}_3 + \text{Cl}^-(\text{aq}) \rightarrow \text{BrCl}(\text{aq}) + \text{NO}_3^-(\text{aq})$      | $k_{\text{exf\_BrNO3}}(01) * 5.E2$                    | see note                                    |
| H8000f_a01 | TrAa01ISc        | $\text{I}_2 \rightarrow \text{I}_2(\text{aq})$                                                              | $k_{\text{exf}}(01, \text{ind\_I2})$                  | see note                                    |
| H8000b_a01 | TrAa01ISc        | $\text{I}_2(\text{aq}) \rightarrow \text{I}_2$                                                              | $k_{\text{exb}}(01, \text{ind\_I2})$                  | see note                                    |
| H8100f_a01 | TrAa01IMblSc     | $\text{IO} \rightarrow \text{IO}(\text{aq})$                                                                | $k_{\text{exf}}(01, \text{ind\_IO})$                  | see note                                    |
| H8100b_a01 | TrAa01IMblSc     | $\text{IO}(\text{aq}) \rightarrow \text{IO}$                                                                | $k_{\text{exb}}(01, \text{ind\_IO})$                  | see note                                    |
| H8101_a01  | TrAa01I          | $\text{OIO} \rightarrow \text{HOI}(\text{aq}) + \text{HO}_2(\text{aq})$                                     | $k_{\text{exf}}(01, \text{ind\_OIO})$                 | see note                                    |
| H8102_a01  | TrAa01I          | $\text{I}_2\text{O}_2 \rightarrow \text{HOI}(\text{aq}) + \text{H}^+(\text{aq}) + \text{IO}_2^-(\text{aq})$ | $k_{\text{exf}}(01, \text{ind\_I2O2})$                | see note                                    |
| H8200f_a01 | TrAa01IMblSc     | $\text{HOI} \rightarrow \text{HOI}(\text{aq})$                                                              | $k_{\text{exf}}(01, \text{ind\_HOI})$                 | see note                                    |
| H8200b_a01 | TrAa01IMblSc     | $\text{HOI}(\text{aq}) \rightarrow \text{HOI}$                                                              | $k_{\text{exb}}(01, \text{ind\_HOI})$                 | see note                                    |
| H8201_a01  | TrAa01IMblSc     | $\text{HI} \rightarrow \text{H}^+(\text{aq}) + \text{I}^-(\text{aq})$                                       | $k_{\text{mt}}(\text{HI}) \cdot lwc$                  | see note                                    |

Table 5: Reversible (Henry’s law) equilibria and irreversible (“heterogenous”) uptake

| #           | labels          | reaction                                                                                                 | rate coefficient                                           | reference |
|-------------|-----------------|----------------------------------------------------------------------------------------------------------|------------------------------------------------------------|-----------|
| H8202_a01   | TrAa01ISc       | $\text{HIO}_3 \rightarrow \text{IO}_3^-(\text{aq}) + \text{H}^+(\text{aq})$                              | $k_{\text{mt}}(\text{HIO}_3) \cdot \text{lwc}$             | see note  |
| H8300_a01   | TrAa01I         | $\text{INO}_2 \rightarrow \text{HOI}(\text{aq}) + \text{HONO}(\text{aq})$                                | $k_{\text{exf}}(01, \text{ind\_INO2})$                     | see note  |
| H8301_a01   | TrAa01IMbl      | $\text{INO}_3 \rightarrow \text{HOI}(\text{aq}) + \text{HNO}_3(\text{aq})$                               | $k_{\text{exf}}(01, \text{ind\_INO3})$                     | see note  |
| H8600f_a01  | TrAa01CIIMblSc  | $\text{ICl} \rightarrow \text{ICl}(\text{aq})$                                                           | $k_{\text{exf}}(01, \text{ind\_ICl})$                      | see note  |
| H8600b_a01  | TrAa01CIIMblSc  | $\text{ICl}(\text{aq}) \rightarrow \text{ICl}$                                                           | $k_{\text{exb}}(01, \text{ind\_ICl})$                      | see note  |
| H8700f_a01  | TrAa01BrIMblSc  | $\text{IBr} \rightarrow \text{IBr}(\text{aq})$                                                           | $k_{\text{exf}}(01, \text{ind\_IBr})$                      | see note  |
| H8700b_a01  | TrAa01BrIMblSc  | $\text{IBr}(\text{aq}) \rightarrow \text{IBr}$                                                           | $k_{\text{exb}}(01, \text{ind\_IBr})$                      | see note  |
| H9100f_a01  | TrAa01SMblScScm | $\text{SO}_2 \rightarrow \text{SO}_2(\text{aq})$                                                         | $k_{\text{exf}}(01, \text{ind\_SO2})$                      | see note  |
| H9100b_a01  | TrAa01SMblScScm | $\text{SO}_2(\text{aq}) \rightarrow \text{SO}_2$                                                         | $k_{\text{exb}}(01, \text{ind\_SO2})$                      | see note  |
| H9200_a01   | TrAa01SMblScScm | $\text{H}_2\text{SO}_4 \rightarrow \text{H}_2\text{SO}_4(\text{aq})$                                     | $\text{xnom7sulf} * k_{\text{exf}}(01, \text{ind\_H2SO4})$ | see note  |
| H9400f_a01  | TrAa01S         | $\text{DMSO} \rightarrow \text{DMSO}(\text{aq})$                                                         | $k_{\text{exf}}(01, \text{ind\_DMSO})$                     | see note  |
| H9400b_a01  | TrAa01S         | $\text{DMSO}(\text{aq}) \rightarrow \text{DMSO}$                                                         | $k_{\text{exb}}(01, \text{ind\_DMSO})$                     | see note  |
| H9401_a01   | TrAa01SMbl      | $\text{CH}_3\text{SO}_3\text{H} \rightarrow \text{CH}_3\text{SO}_3^-(\text{aq}) + \text{H}^+(\text{aq})$ | $k_{\text{exf}}(01, \text{ind\_CH3SO3H})$                  | see note  |
| H9402f_a01  | TrAa01S         | $\text{DMS} \rightarrow \text{DMS}(\text{aq})$                                                           | $k_{\text{exf}}(01, \text{ind\_DMS})$                      | see note  |
| H9402b_a01  | TrAa01S         | $\text{DMS}(\text{aq}) \rightarrow \text{DMS}$                                                           | $k_{\text{exb}}(01, \text{ind\_DMS})$                      | see note  |
| H10000f_a01 | TrAa01Hg        | $\text{Hg} \rightarrow \text{Hg}(\text{aq})$                                                             | $k_{\text{exf}}(01, \text{ind\_Hg})$                       | see note  |
| H10000b_a01 | TrAa01Hg        | $\text{Hg}(\text{aq}) \rightarrow \text{Hg}$                                                             | $k_{\text{exb}}(01, \text{ind\_Hg})$                       | see note  |
| H10100f_a01 | TrAa01Hg        | $\text{HgO} \rightarrow \text{HgO}(\text{aq})$                                                           | $k_{\text{exf}}(01, \text{ind\_HgO})$                      | see note  |
| H10100b_a01 | TrAa01Hg        | $\text{HgO}(\text{aq}) \rightarrow \text{HgO}$                                                           | $k_{\text{exb}}(01, \text{ind\_HgO})$                      | see note  |
| H10600f_a01 | TrAa01HgCl      | $\text{HgCl}_2 \rightarrow \text{HgCl}_2(\text{aq})$                                                     | $k_{\text{exf}}(01, \text{ind\_HgCl2})$                    | see note  |
| H10600b_a01 | TrAa01HgCl      | $\text{HgCl}_2(\text{aq}) \rightarrow \text{HgCl}_2$                                                     | $k_{\text{exb}}(01, \text{ind\_HgCl2})$                    | see note  |
| H10700f_a01 | TrAa01HgBr      | $\text{HgBr}_2 \rightarrow \text{HgBr}_2(\text{aq})$                                                     | $k_{\text{exf}}(01, \text{ind\_HgBr2})$                    | see note  |
| H10700b_a01 | TrAa01HgBr      | $\text{HgBr}_2(\text{aq}) \rightarrow \text{HgBr}_2$                                                     | $k_{\text{exb}}(01, \text{ind\_HgBr2})$                    | see note  |
| H10701f_a01 | TrAa01HgClBr    | $\text{ClHgBr} \rightarrow \text{ClHgBr}(\text{aq})$                                                     | $k_{\text{exf}}(01, \text{ind\_ClHgBr})$                   | see note  |
| H10701b_a01 | TrAa01HgClBr    | $\text{ClHgBr}(\text{aq}) \rightarrow \text{ClHgBr}$                                                     | $k_{\text{exb}}(01, \text{ind\_ClHgBr})$                   | see note  |
| H10702f_a01 | TrAa01HgBr      | $\text{BrHgOBr} \rightarrow \text{BrHgOBr}(\text{aq})$                                                   | $k_{\text{exf}}(01, \text{ind\_BrHgOBr})$                  | see note  |
| H10702b_a01 | TrAa01HgBr      | $\text{BrHgOBr}(\text{aq}) \rightarrow \text{BrHgOBr}$                                                   | $k_{\text{exb}}(01, \text{ind\_BrHgOBr})$                  | see note  |
| H10703f_a01 | TrAa01HgClBr    | $\text{ClHgOBr} \rightarrow \text{ClHgOBr}(\text{aq})$                                                   | $k_{\text{exf}}(01, \text{ind\_ClHgOBr})$                  | see note  |
| H10703b_a01 | TrAa01HgClBr    | $\text{ClHgOBr}(\text{aq}) \rightarrow \text{ClHgOBr}$                                                   | $k_{\text{exb}}(01, \text{ind\_ClHgOBr})$                  | see note  |

\*Notes:

The forward ( $k_{\text{exf}}$ ) and backward ( $k_{\text{exb}}$ ) rate coefficients are calculated in the file `messy_mecca_aero.f90`

using the accommodation coefficients in subroutine `mecca_aero_alpha` and Henry’s law constants in subroutine `mecca_aero_henry`.

$k_{\text{mt}}$  = mass transfer coefficient

$\text{lwc}$  = liquid water content of aerosol mode

H3201, H6300, H6301, H6302, H7300, H7301, H7302,



H7601, H7602: For uptake of X (X = N<sub>2</sub>O<sub>5</sub>, ClNO<sub>3</sub>, or BrNO<sub>3</sub>) and subsequent reaction with H<sub>2</sub>O, Cl<sup>-</sup>, and Br<sup>-</sup>, we define:

$$k_{\text{exf}}(\text{X}) = \frac{k_{\text{mt}}(\text{X}) \times \text{LWC}}{[\text{H}_2\text{O}] + 5 \times 10^2 [\text{Cl}^-] + 3 \times 10^5 [\text{Br}^-]}$$

The total uptake rate of X is only determined by  $k_{\text{mt}}$ . The factors only affect the branching between hydrolysis and the halide reactions. The factor  $5 \times 10^2$  was chosen such that the chloride reaction dominates over hydrolysis at about  $[\text{Cl}^-] > 0.1 \text{ M}$  (see Fig. 3 in

Behnke et al. (1997)), i.e. when the ratio  $[\text{H}_2\text{O}]/[\text{Cl}^-]$  is less than  $5 \times 10^2$ . The ratio  $5 \times 10^2 / 3 \times 10^5$  was chosen such that the reactions with chloride and bromide are roughly equal for sea water composition (Behnke et al., 1994).

Table 6: Heterogeneous reactions

| #       | labels     | reaction                                                                                | rate coefficient                                 | reference |
|---------|------------|-----------------------------------------------------------------------------------------|--------------------------------------------------|-----------|
| HET200  | StHetN     | $\text{N}_2\text{O}_5 + \text{H}_2\text{O} \rightarrow 2 \text{HNO}_3$                  | <code>khet_St(ihs_N2O5_H2O)</code>               | see note  |
| HET201  | TrHetN     | $\text{N}_2\text{O}_5 \rightarrow 2 \text{NO}_3^-(\text{aq}) + 2 \text{H}^+(\text{aq})$ | <code>khet_Tr(iht_N2O5)</code>                   | see note  |
| HET410  | StHetCl    | $\text{HOCl} + \text{HCl} \rightarrow \text{Cl}_2 + \text{H}_2\text{O}$                 | <code>khet_St(ihs_HOCl_HCl)</code>               | see note  |
| HET420  | StHetNCl   | $\text{ClNO}_3 + \text{HCl} \rightarrow \text{Cl}_2 + \text{HNO}_3$                     | <code>khet_St(ihs_ClNO3_HCl)</code>              | see note  |
| HET421  | StHetNCl   | $\text{ClNO}_3 + \text{H}_2\text{O} \rightarrow \text{HOCl} + \text{HNO}_3$             | <code>khet_St(ihs_ClNO3_H2O)</code>              | see note  |
| HET422  | StHetNCl   | $\text{N}_2\text{O}_5 + \text{HCl} \rightarrow \text{ClNO}_2 + \text{HNO}_3$            | <code>khet_St(ihs_N2O5_HCl)</code>               | see note  |
| HET510  | StHetBr    | $\text{HOBr} + \text{HBr} \rightarrow \text{Br}_2 + \text{H}_2\text{O}$                 | <code>khet_St(ihs_HOBr_HBr)</code>               | see note  |
| HET520  | StHetNBr   | $\text{BrNO}_3 + \text{H}_2\text{O} \rightarrow \text{HOBr} + \text{HNO}_3$             | <code>khet_St(ihs_BrNO3_H2O)</code>              | see note  |
| HET540  | StHetNClBr | $\text{ClNO}_3 + \text{HBr} \rightarrow \text{BrCl} + \text{HNO}_3$                     | <code>khet_St(ihs_ClNO3_HBr)</code>              | see note  |
| HET541  | StHetNClBr | $\text{BrNO}_3 + \text{HCl} \rightarrow \text{BrCl} + \text{HNO}_3$                     | <code>khet_St(ihs_BrNO3_HCl)</code>              | see note  |
| HET542  | StHetClBr  | $\text{HOCl} + \text{HBr} \rightarrow \text{BrCl} + \text{H}_2\text{O}$                 | <code>khet_St(ihs_HOCl_HBr)</code>               | see note  |
| HET543  | StHetClBr  | $\text{HOBr} + \text{HCl} \rightarrow \text{BrCl} + \text{H}_2\text{O}$                 | <code>khet_St(ihs_HOBr_HCl)</code>               | see note  |
| HET1001 | StTrHetHg  | $\text{Hg} \rightarrow \text{Hg}(\text{aq})$                                            | <code>khet_Tr(iht_Hg) + khet_St(ihs_Hg)</code>   | see note  |
| HET1002 | StTrHetHg  | $\text{HgO} \rightarrow \text{Hg}(\text{aq})$                                           | <code>khet_Tr(iht_RGM) + khet_St(ihs_RGM)</code> | see note  |
| HET1003 | StTrHetHg  | $\text{HgCl} \rightarrow \text{Hg}(\text{aq})$                                          | <code>khet_Tr(iht_RGM) + khet_St(ihs_RGM)</code> | see note  |
| HET1004 | StTrHetHg  | $\text{HgCl}_2 \rightarrow \text{Hg}(\text{aq})$                                        | <code>khet_Tr(iht_RGM) + khet_St(ihs_RGM)</code> | see note  |
| HET1005 | StTrHetHg  | $\text{HgBr} \rightarrow \text{Hg}(\text{aq})$                                          | <code>khet_Tr(iht_RGM) + khet_St(ihs_RGM)</code> | see note  |
| HET1006 | StTrHetHg  | $\text{HgBr}_2 \rightarrow \text{Hg}(\text{aq})$                                        | <code>khet_Tr(iht_RGM) + khet_St(ihs_RGM)</code> | see note  |
| HET1007 | StTrHetHg  | $\text{ClHgBr} \rightarrow \text{Hg}(\text{aq})$                                        | <code>khet_Tr(iht_RGM) + khet_St(ihs_RGM)</code> | see note  |
| HET1008 | StTrHetHg  | $\text{BrHgOBr} \rightarrow \text{Hg}(\text{aq})$                                       | <code>khet_Tr(iht_RGM) + khet_St(ihs_RGM)</code> | see note  |
| HET1009 | StTrHetHg  | $\text{ClHgOBr} \rightarrow \text{Hg}(\text{aq})$                                       | <code>khet_Tr(iht_RGM) + khet_St(ihs_RGM)</code> | see note  |

\*Notes:

Heterogeneous reaction rates are calculated with an external module and then supplied to the MECCA chemistry (see [www.messy-interface.org](http://www.messy-interface.org) for details)

Table 7: Acid-base and other equilibria

| #         | labels           | reaction                                                                            | $K_0[M^{m-n}]$ | $-\Delta H/R[K]$ | reference                           |
|-----------|------------------|-------------------------------------------------------------------------------------|----------------|------------------|-------------------------------------|
| EQ20_a01  | TrAa01Sc         | $\text{HO}_2 \rightleftharpoons \text{O}_2^- + \text{H}^+$                          | 1.6E-5         |                  | Weinstein-Lloyd and Schwartz (1991) |
| EQ21_a01  | TrAa01MblScScm   | $\text{H}_2\text{O} \rightleftharpoons \text{H}^+ + \text{OH}^-$                    | 1.0E-16        | -6716            | Chameides (1984)                    |
| EQ30_a01  | TrAa01MblNScScm  | $\text{NH}_4^+ \rightleftharpoons \text{H}^+ + \text{NH}_3$                         | 5.88E-10       | -2391            | Chameides (1984)                    |
| EQ31_a01  | TrAa01NSc        | $\text{HONO} \rightleftharpoons \text{H}^+ + \text{NO}_2^-$                         | 5.1E-4         | -1260            | Schwartz and White (1981)           |
| EQ32_a01  | TrAa01MblNScScm  | $\text{HNO}_3 \rightleftharpoons \text{H}^+ + \text{NO}_3^-$                        | 15             | 8700             | Davis and de Bruin (1964)           |
| EQ33_a01  | TrAa01NSc        | $\text{HNO}_4 \rightleftharpoons \text{NO}_4^- + \text{H}^+$                        | 1.E-5          |                  | Warneck (1999)                      |
| EQ40_a01  | TrAa01MblScScm   | $\text{CO}_2 \rightleftharpoons \text{H}^+ + \text{HCO}_3^-$                        | 4.3E-7         | -913             | Chameides (1984)*                   |
| EQ41_a01  | TrAa01ScScm      | $\text{HCOOH} \rightleftharpoons \text{H}^+ + \text{HCOO}^-$                        | 1.8E-4         |                  | Weast (1980)                        |
| EQ60_a01  | TrAa01Cl         | $\text{Cl}_2 \rightleftharpoons \text{Cl} + \text{Cl}^-$                            | 7.3E-6         |                  | Yu (2004)                           |
| EQ61_a01  | TrAa01ClMblScScm | $\text{HCl} \rightleftharpoons \text{H}^+ + \text{Cl}^-$                            | 1.7E6          | 6896             | Marsh and McElroy (1985)            |
| EQ62_a01  | TrAa01ClSc       | $\text{HOCl} \rightleftharpoons \text{H}^+ + \text{ClO}^-$                          | 3.2E-8         |                  | Lax (1969)                          |
| EQ70_a01  | TrAa01Br         | $\text{Br}_2 \rightleftharpoons \text{Br} + \text{Br}^-$                            | 2.54E-6        | -2256            | Liu et al. (2002)                   |
| EQ71_a01  | TrAa01BrMblScScm | $\text{HBr} \rightleftharpoons \text{H}^+ + \text{Br}^-$                            | 1.0E9          |                  | Lax (1969)                          |
| EQ72_a01  | TrAa01BrSc       | $\text{HOBr} \rightleftharpoons \text{H}^+ + \text{BrO}^-$                          | 2.3E-9         | -3091            | Kelley and Tartar (1956)*           |
| EQ73_a01  | TrAa01ClBrMbl    | $\text{BrCl} + \text{Cl}^- \rightleftharpoons \text{BrCl}_2^-$                      | 3.8            | 1191             | Wang et al. (1994)                  |
| EQ74_a01  | TrAa01ClBrMbl    | $\text{BrCl} + \text{Br}^- \rightleftharpoons \text{Br}_2\text{Cl}^-$               | 1.8E4          | 7457             | Wang et al. (1994)                  |
| EQ75_a01  | TrAa01ClBrMbl    | $\text{Br}_2 + \text{Cl}^- \rightleftharpoons \text{Br}_2\text{Cl}^-$               | 1.3            | 0                | Wang et al. (1994)                  |
| EQ76_a01  | TrAa01ClBrMbl    | $\text{Br}^- + \text{Cl}_2 \rightleftharpoons \text{BrCl}_2^-$                      | 4.2E6          | 14072            | Wang et al. (1994)                  |
| EQ80_a01  | TrAa01ClIMblSc   | $\text{ICl} + \text{Cl}^- \rightleftharpoons \text{ICl}_2^-$                        | 7.7E1          |                  | Wang et al. (1989)                  |
| EQ81_a01  | TrAa01BrIMblSc   | $\text{IBr} + \text{Br}^- \rightleftharpoons \text{IBr}_2^-$                        | 2.9E2          |                  | Troy and Margerum (1991)            |
| EQ82_a01  | TrAa01ClBrIMblSc | $\text{ICl} + \text{Br}^- \rightleftharpoons \text{IBr} + \text{Cl}^-$              | 3.3E2          |                  | see note                            |
| EQ90_a01  | TrAa01SMblScScm  | $\text{SO}_2 \rightleftharpoons \text{H}^+ + \text{HSO}_3^-$                        | 1.7E-2         | 2090             | Chameides (1984)                    |
| EQ91_a01  | TrAa01SMblScScm  | $\text{HSO}_3^- \rightleftharpoons \text{H}^+ + \text{SO}_3^{2-}$                   | 6.0E-8         | 1120             | Chameides (1984)                    |
| EQ92_a01  | TrAa01SMblScScm  | $\text{HSO}_4^- \rightleftharpoons \text{H}^+ + \text{SO}_4^{2-}$                   | 1.2E-2         | 2720             | Seinfeld and Pandis (1998)          |
| EQ93_a01  | TrAa01SMblScScm  | $\text{H}_2\text{SO}_4 \rightleftharpoons \text{H}^+ + \text{HSO}_4^-$              | 1.0E3          |                  | Seinfeld and Pandis (1998)          |
| EQ100_a01 | TrAa01Hg         | $\text{Hg}^{2+} + \text{OH}^- \rightleftharpoons \text{HgOH}^+$                     | 4.0E10         |                  | Ammann and Pöschl (2007)            |
| EQ101_a01 | TrAa01Hg         | $\text{HgOH}^+ + \text{OH}^- \rightleftharpoons \text{Hg}(\text{OH})_2$             | 1.58E11        |                  | Ammann and Pöschl (2007)            |
| EQ102_a01 | TrAa01HgCl       | $\text{Hg}^{2+} + \text{Cl}^- \rightleftharpoons \text{HgCl}^+$                     | 5.8E6          |                  | Ammann and Pöschl (2007)            |
| EQ103_a01 | TrAa01HgCl       | $\text{HgCl}^+ + \text{Cl}^- \rightleftharpoons \text{HgCl}_2$                      | 2.5E6          |                  | Ammann and Pöschl (2007)            |
| EQ104_a01 | TrAa01HgCl       | $\text{HgOH}^+ + \text{Cl}^- \rightleftharpoons \text{Hg}(\text{OH})\text{Cl}$      | 2.69E7         |                  | Ammann and Pöschl (2007)            |
| EQ105_a01 | TrAa01HgBr       | $\text{Hg}^{2+} + \text{Br}^- \rightleftharpoons \text{HgBr}^+$                     | 1.1E9          |                  | Raofie and Ariya (2004)             |
| EQ106_a01 | TrAa01HgBr       | $\text{HgBr}^+ + \text{Br}^- \rightleftharpoons \text{HgBr}_2$                      | 2.5E8          |                  | Raofie and Ariya (2004)             |
| EQ107_a01 | TrAa01HgS        | $\text{Hg}^{2+} + \text{SO}_3^{2-} \rightleftharpoons \text{HgSO}_3$                | 2.E13          |                  | van Loon et al. (2001)              |
| EQ108_a01 | TrAa01HgS        | $\text{HgSO}_3 + \text{SO}_3^{2-} \rightleftharpoons \text{Hg}(\text{SO}_3)_2^{2-}$ | 1.E10          |                  | van Loon et al. (2001)              |

\*Notes:

EQ40: For  $pK_a(\text{CO}_2)$ , see also Dickson and Millero (1987).

EQ72: For  $pK_a(\text{HOBr})$ , see also Keller-Rudek et al. (1992).

EQ82: Thermodynamic calculations on the IBr/ICl equilibrium according to the data tables from Wagman et al. (1982):

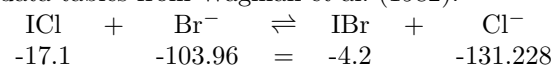

$$\frac{\Delta G}{[\text{kJ/mol}]} = -4.2 - 131.228 - (-17.1 - 103.96) = -14.368$$

$$K = \frac{[\text{IBr}] \times [\text{Cl}^-]}{[\text{ICl}] \times [\text{Br}^-]} = \exp\left(\frac{-\Delta G}{RT}\right) = \exp\left(\frac{14368}{8.314 \times 298}\right) = 330$$

This means we have equal amounts of IBr and ICl when the  $[\text{Cl}^-]/[\text{Br}^-]$  ratio equals 330.

Table 8: Aqueous phase reactions

| #          | labels    | reaction                                       | $k_0 [M^{1-n}s^{-1}]$ | $-E_a/R[K]$ | reference                       |
|------------|-----------|------------------------------------------------|-----------------------|-------------|---------------------------------|
| A1000_a01  | TrAa01Sc  | $O_3 + O_2^- \rightarrow OH + OH^-$            | 1.5E9                 |             | Sehested et al. (1983)          |
| A2100_a01  | TrAa01Sc  | $OH + O_2^- \rightarrow OH^-$                  | 1.0E10                |             | Sehested et al. (1968)          |
| A2101_a01  | TrAa01Sc  | $OH + OH \rightarrow H_2O_2$                   | 5.5E9                 |             | Buxton et al. (1988)            |
| A2102_a01  | TrAa01Sc  | $HO_2 + O_2^- \rightarrow H_2O_2 + OH^-$       | 1.0E8                 | -900        | Christensen and Sehested (1988) |
| A2103_a01  | TrAa01Sc  | $HO_2 + OH \rightarrow H_2O$                   | 7.1E9                 |             | Sehested et al. (1968)          |
| A2104_a01  | TrAa01Sc  | $HO_2 + HO_2 \rightarrow H_2O_2$               | 9.7E5                 | -2500       | Christensen and Sehested (1988) |
| A2105_a01  | TrAa01Sc  | $H_2O_2 + OH \rightarrow HO_2$                 | 2.7E7                 | -1684       | Christensen et al. (1982)       |
| A3100_a01  | TrAa01NSc | $NO_2^- + O_3 \rightarrow NO_3^-$              | 5.0E5                 | -6950       | Damschen and Martin (1983)      |
| A3101_a01  | TrAa01NSc | $NO_2 + NO_2 \rightarrow HNO_3 + HONO$         | 1.0E8                 |             | Lee and Schwartz (1981)         |
| A3102_a01  | TrAa01NSc | $NO_4^- \rightarrow NO_2^-$                    | 8.0E1                 |             | Warneck (1999)                  |
| A3200_a01  | TrAa01NSc | $NO_2 + HO_2 \rightarrow HNO_4$                | 1.8E9                 |             | Warneck (1999)                  |
| A3201_a01  | TrAa01NSc | $NO_2^- + OH \rightarrow NO_2 + OH^-$          | 1.0E10                |             | Wingenter et al. (1999)         |
| A3202_a01  | TrAa01NSc | $NO_3 + OH^- \rightarrow NO_3^- + OH$          | 8.2E7                 | -2700       | Exner et al. (1992)             |
| A3203_a01  | TrAa01NSc | $HONO + OH \rightarrow NO_2$                   | 1.0E10                |             | Barker et al. (1970)            |
| A3204_a01  | TrAa01NSc | $HONO + H_2O_2 + H^+ \rightarrow HNO_3 + H^+$  | 4.6E3                 | -6800       | Damschen and Martin (1983)      |
| A4100_a01  | TrAa01Sc  | $CO_3^- + O_2^- \rightarrow HCO_3^- + OH^-$    | 6.5E8                 |             | Ross et al. (1992)              |
| A4101_a01  | TrAa01Sc  | $CO_3^- + H_2O_2 \rightarrow HCO_3^- + HO_2$   | 4.3E5                 |             | Ross et al. (1992)              |
| A4102_a01  | TrAa01Sc  | $HCOO^- + CO_3^- \rightarrow 2 HCO_3^- + HO_2$ | 1.5E5                 |             | Ross et al. (1992)              |
| A4103_a01  | TrAa01Sc  | $HCOO^- + OH \rightarrow OH^- + HO_2 + CO_2$   | 3.1E9                 | -1240       | Chin and Wine (1994)            |
| A4104_a01  | TrAa01Sc  | $HCO_3^- + OH \rightarrow CO_3^-$              | 8.5E6                 |             | Ross et al. (1992)              |
| A4105_a01  | TrAa01Sc  | $HCHO + OH \rightarrow HCOOH + HO_2$           | 7.7E8                 | -1020       | Chin and Wine (1994)            |
| A4106_a01  | TrAa01Sc  | $HCOOH + OH \rightarrow HO_2 + CO_2$           | 1.1E8                 | -991        | Chin and Wine (1994)            |
| A4107_a01  | TrAa01Sc  | $CH_3OO + O_2^- \rightarrow CH_3OOH + OH^-$    | 5.0E7                 |             | Jacob (1986)                    |
| A4108_a01  | TrAa01Sc  | $CH_3OO + HO_2 \rightarrow CH_3OOH$            | 4.3E5                 |             | Jacob (1986)                    |
| A4109_a01  | TrAa01Sc  | $CH_3OH + OH \rightarrow HCHO + HO_2$          | 9.7E8                 |             | Buxton et al. (1988)            |
| A4110a_a01 | TrAa01Sc  | $CH_3OOH + OH \rightarrow CH_3OO$              | 2.7E7                 | -1715       | Jacob (1986)                    |
| A4110b_a01 | TrAa01Sc  | $CH_3OOH + OH \rightarrow HCHO + OH$           | 1.1E7                 | -1715       | Jacob (1986)                    |
| A6000_a01  | TrAa01Cl  | $Cl + Cl \rightarrow Cl_2$                     | 8.8E7                 |             | Wu et al. (1980)                |
| A6001_a01  | TrAa01Cl  | $Cl_2^- + Cl_2^- \rightarrow Cl_2 + 2 Cl^-$    | 3.5E9                 |             | Yu (2004)                       |
| A6100_a01  | TrAa01Cl  | $Cl^- + O_3 \rightarrow ClO^-$                 | 3.0E-3                |             | Hoigné et al. (1985)            |
| A6101_a01  | TrAa01Cl  | $Cl_2 + O_2^- \rightarrow Cl_2^-$              | 1.0E9                 |             | Bjergbakke et al. (1981)        |
| A6102_a01  | TrAa01Cl  | $Cl_2^- + O_2^- \rightarrow 2 Cl^-$            | 1.0E9                 |             | Jacobi (1996)*                  |
| A6200_a01  | TrAa01Cl  | $Cl \rightarrow H^+ + ClOH^-$                  | 1.8E5                 |             | Yu (2004)                       |
| A6201_a01  | TrAa01Cl  | $Cl + H_2O_2 \rightarrow HO_2 + Cl^- + H^+$    | 2.7E7                 | -1684       | Christensen et al. (1982)       |

Table 8: Aqueous phase reactions (...continued)

| #          | labels        | reaction                                             | $k_0 [M^{1-n}s^{-1}]$ | $-E_a/R[K]$ | reference                     |
|------------|---------------|------------------------------------------------------|-----------------------|-------------|-------------------------------|
| A6202_a01  | TrAa01Cl      | $Cl^- + OH^- \rightarrow ClOH^-$                     | 4.2E9                 |             | Yu (2004)                     |
| A6203_a01  | TrAa01Cl      | $Cl_2 + HO_2 \rightarrow Cl_2^- + H^+$               | 1.0E9                 |             | Bjergbakke et al. (1981)      |
| A6204_a01  | TrAa01ClMbl   | $Cl_2 \rightarrow Cl^- + HOCl + H^+$                 | 21.8                  | -8012       | Wang and Margerum (1994)      |
| A6205_a01  | TrAa01Cl      | $Cl_2^- + HO_2 \rightarrow 2 Cl^- + H^+$             | 1.3E10                |             | Jacobi (1996)                 |
| A6206_a01  | TrAa01Cl      | $HOCl + O_2^- \rightarrow Cl + OH^-$                 | 7.5E6                 |             | Long and Bielski (1980)       |
| A6207_a01  | TrAa01Cl      | $HOCl + HO_2 \rightarrow Cl$                         | 7.5E6                 |             | Long and Bielski (1980)       |
| A6208_a01  | TrAa01ClMbl   | $HOCl + Cl^- + H^+ \rightarrow Cl_2$                 | 2.2E4                 | -3508       | Wang and Margerum (1994)      |
| A6209_a01  | TrAa01Cl      | $ClOH^- \rightarrow Cl^- + OH^-$                     | 6.0E9                 |             | Yu (2004)                     |
| A6210_a01  | TrAa01Cl      | $ClOH^- + H^+ \rightarrow Cl$                        | 2.4E10                |             | Yu (2004)                     |
| A6300_a01  | TrAa01Cl      | $Cl + NO_3^- \rightarrow NO_3 + Cl^-$                | 1.0E8                 |             | Buxton et al. (1999b)         |
| A6301_a01  | TrAa01Cl      | $Cl^- + NO_3 \rightarrow NO_3^- + Cl$                | 3.4E8                 |             | Buxton et al. (1999b)*        |
| A6302_a01  | TrAa01Cl      | $Cl_2^- + NO_2^- \rightarrow 2 Cl^- + NO_2$          | 6.0E7                 |             | Jacobi et al. (1996)          |
| A6400_a01  | TrAa01Cl      | $Cl_2^- + CH_3OOH \rightarrow 2 Cl^- + H^+ + CH_3OO$ | 5.0E4                 |             | Jacobi et al. (1996)          |
| A7000_a01  | TrAa01Br      | $Br_2^- + Br_2^- \rightarrow 2 Br^- + Br_2$          | 1.9E9                 |             | Ross et al. (1992)            |
| A7100_a01  | TrAa01Br      | $Br^- + O_3 \rightarrow BrO^-$                       | 2.1E2                 | -4450       | Haag and Hoigné (1983)        |
| A7101_a01  | TrAa01Br      | $Br_2 + O_2^- \rightarrow Br_2^-$                    | 5.6E9                 |             | Sutton and Downes (1972)      |
| A7102_a01  | TrAa01Br      | $Br_2^- + O_2^- \rightarrow 2 Br^-$                  | 1.7E8                 |             | Wagner and Strehlow (1987)    |
| A7200_a01  | TrAa01Br      | $Br^- + OH^- \rightarrow BrOH^-$                     | 1.1E10                |             | Zehavi and Rabani (1972)      |
| A7201_a01  | TrAa01Br      | $Br_2 + HO_2 \rightarrow Br_2^- + H^+$               | 1.1E8                 |             | Sutton and Downes (1972)      |
| A7202_a01  | TrAa01BrMbl   | $Br_2 \rightarrow Br^- + HOBr + H^+$                 | 9.7E1                 | -7457       | Beckwith et al. (1996)        |
| A7203_a01  | TrAa01Br      | $Br_2^- + HO_2 \rightarrow Br_2 + H_2O_2 + OH^-$     | 4.4E9                 |             | Matthew et al. (2003)         |
| A7204_a01  | TrAa01Br      | $Br_2^- + H_2O_2 \rightarrow 2 Br^- + H^+ + HO_2$    | 1.0E5                 |             | Jacobi (1996)                 |
| A7205_a01  | TrAa01Br      | $HOBr + O_2^- \rightarrow Br + OH^-$                 | 3.5E9                 |             | Schwarz and Bielski (1986)    |
| A7206_a01  | TrAa01Br      | $HOBr + HO_2 \rightarrow Br$                         | 1.0E9                 |             | Herrmann et al. (1999)        |
| A7207_a01  | TrAa01Br      | $HOBr + H_2O_2 \rightarrow Br^- + H^+$               | 1.2E6                 |             | Bichsel and von Gunten (1999) |
| A7208_a01  | TrAa01BrMbl   | $HOBr + Br^- + H^+ \rightarrow Br_2$                 | 1.6E10                |             | Beckwith et al. (1996)        |
| A7209a_a01 | TrAa01Br      | $BrOH^- \rightarrow Br^- + OH^-$                     | 3.3E7                 |             | Zehavi and Rabani (1972)      |
| A7209b_a01 | TrAa01Br      | $BrOH^- \rightarrow Br + OH^-$                       | 4.2E6                 |             | Zehavi and Rabani (1972)      |
| A7210_a01  | TrAa01Br      | $BrOH^- + H^+ \rightarrow Br$                        | 4.4E10                |             | Zehavi and Rabani (1972)      |
| A7300_a01  | TrAa01Br      | $Br^- + NO_3 \rightarrow Br + NO_3^-$                | 4.0E9                 |             | Neta and Huie (1986)          |
| A7301_a01  | TrAa01Br      | $Br_2^- + NO_2^- \rightarrow 2 Br^- + NO_2$          | 1.7E7                 | -1720       | Shoute et al. (1991)          |
| A7400_a01  | TrAa01Br      | $Br_2^- + CH_3OOH \rightarrow 2 Br^- + H^+ + CH_3OO$ | 1.0E5                 |             | Jacobi (1996)*                |
| A7601_a01  | TrAa01Br      | $Br^- + ClO^- + H^+ \rightarrow BrCl + OH^-$         | 3.7E10                |             | Kumar and Margerum (1987)     |
| A7602_a01  | TrAa01ClBrMbl | $Br^- + HOCl + H^+ \rightarrow BrCl$                 | 1.32E6                |             | Kumar and Margerum (1987)     |

Table 8: Aqueous phase reactions (...continued)

| #         | labels          | reaction                                                                                                                                           | $k_0 [M^{1-n}s^{-1}]$ | $-E_a/R[K]$ | reference                                         |
|-----------|-----------------|----------------------------------------------------------------------------------------------------------------------------------------------------|-----------------------|-------------|---------------------------------------------------|
| A7603_a01 | TrAa01ClBrMbl   | $\text{HOBr} + \text{Cl}^- + \text{H}^+ \rightarrow \text{BrCl}$                                                                                   | 2.3E10                |             | see note                                          |
| A7604_a01 | TrAa01ClBrMbl   | $\text{BrCl} \rightarrow \text{Cl}^- + \text{HOBr} + \text{H}^+$                                                                                   | 3.0E6                 |             | Liu and Margerum (2001)                           |
| A8100_a01 | TrAa01IMbl      | $\text{I}^- + \text{O}_3 \rightarrow \text{HOI} + \text{OH}^-$                                                                                     | 4.2E9                 | -9311       | Magi et al. (1997)                                |
| A8101_a01 | TrAa01IMbl      | $\text{IO} + \text{IO} \rightarrow \text{HOI} + \text{IO}_2^- + \text{H}^+$                                                                        | 1.5E9                 |             | Buxton et al. (1986)                              |
| A8200_a01 | TrAa01IMbl      | $\text{IO}_2^- + \text{H}_2\text{O}_2 \rightarrow \text{IO}_3^-$                                                                                   | 6.0E1                 |             | Furrow (1987)                                     |
| A8201_a01 | TrAa01I         | $\text{HOI} + \text{IO}_2^- \rightarrow \text{IO}_3^- + \text{I}^- + \text{H}^+$                                                                   | 6.0E2                 |             | Chinake and Simoyi (1996)                         |
| A8202_a01 | TrAa01IMbl      | $\text{HOI} + \text{I}^- + \text{H}^+ \rightarrow \text{I}_2$                                                                                      | 4.4E12                |             | Eigen and Kustin (1962)                           |
| A8203_a01 | TrAa01IMbl      | $\text{IO}_2^- + \text{I}^- + \text{H}^+ \rightarrow 2 \text{HOI} + \text{OH}^-$                                                                   | 2.0E10                |             | Edblom et al. (1987)                              |
| A8600_a01 | TrAa01ClIMbl    | $\text{ICl} \rightarrow \text{HOI} + \text{Cl}^- + \text{H}^+$                                                                                     | 2.4E6                 |             | Wang et al. (1989)                                |
| A8601_a01 | TrAa01ClIMbl    | $\text{I}^- + \text{HOCl} + \text{H}^+ \rightarrow \text{ICl}$                                                                                     | 3.5E11                |             | Nagy et al. (1988)                                |
| A8602_a01 | TrAa01ClI       | $\text{IO}_2^- + \text{HOCl} \rightarrow \text{IO}_3^- + \text{Cl}^- + \text{H}^+$                                                                 | 1.5E3                 |             | Lengyel et al. (1996)                             |
| A8603_a01 | TrAa01ClIMbl    | $\text{HOI} + \text{Cl}^- + \text{H}^+ \rightarrow \text{ICl}$                                                                                     | 2.9E10                |             | Wang et al. (1989)                                |
| A8604_a01 | TrAa01ClI       | $\text{HOI} + \text{Cl}_2 \rightarrow \text{IO}_2^- + 2 \text{Cl}^- + 3\text{H}^+$                                                                 | 1.0E6                 |             | Lengyel et al. (1996)                             |
| A8605_a01 | TrAa01ClI       | $\text{HOI} + \text{HOCl} \rightarrow \text{IO}_2^- + \text{Cl}^- + 2 \text{H}^+$                                                                  | 5.0E5                 |             | Citri and Epstein (1988)                          |
| A8606_a01 | TrAa01ClI       | $\text{ICl} + \text{I}^- \rightarrow \text{I}_2 + \text{Cl}^-$                                                                                     | 1.1E9                 |             | Margerum et al. (1986)                            |
| A8700_a01 | TrAa01BrIMbl    | $\text{IBr} \rightarrow \text{HOI} + \text{H}^+ + \text{Br}^-$                                                                                     | 8.0E5                 |             | Troy et al. (1991)                                |
| A8701_a01 | TrAa01BrIMbl    | $\text{I}^- + \text{HOBr} \rightarrow \text{IBr} + \text{OH}^-$                                                                                    | 5.0E9                 |             | Troy and Margerum (1991)                          |
| A8702_a01 | TrAa01BrI       | $\text{IO}_2^- + \text{HOBr} \rightarrow \text{IO}_3^- + \text{Br}^- + \text{H}^+$                                                                 | 1.0E6                 |             | Chinake and Simoyi (1996)                         |
| A8703_a01 | TrAa01BrIMbl    | $\text{HOI} + \text{Br}^- + \text{H}^+ \rightarrow \text{IBr}$                                                                                     | 3.3E12                |             | Troy et al. (1991)                                |
| A8704_a01 | TrAa01BrI       | $\text{HOI} + \text{HOBr} \rightarrow \text{IO}_2^- + \text{Br}^- + 2 \text{H}^+$                                                                  | 1.0E6                 |             | Chinake and Simoyi (1996)                         |
| A8705_a01 | TrAa01ClI       | $\text{IBr} + \text{I}^- \rightarrow \text{I}_2 + \text{Br}^-$                                                                                     | 2.0E9                 |             | Faria et al. (1993)                               |
| A9100_a01 | TrAa01SSc       | $\text{SO}_3^- + \text{O}_2 \rightarrow \text{SO}_5^-$                                                                                             | 1.5E9                 |             | Huie and Neta (1987)                              |
| A9101_a01 | TrAa01SMblScScm | $\text{SO}_3^{2-} + \text{O}_3 \rightarrow \text{SO}_4^{2-}$                                                                                       | 1.5E9                 | -5300       | Hoffmann (1986)                                   |
| A9102_a01 | TrAa01SSc       | $\text{SO}_4^- + \text{O}_2^- \rightarrow \text{SO}_4^{2-}$                                                                                        | 3.5E9                 |             | Jiang et al. (1992)                               |
| A9103_a01 | TrAa01SSc       | $\text{SO}_4^- + \text{SO}_3^{2-} \rightarrow \text{SO}_3^- + \text{SO}_4^{2-}$                                                                    | 4.6E8                 |             | Huie and Neta (1987)                              |
| A9104_a01 | TrAa01SSc       | $\text{SO}_5^- + \text{O}_2^- \rightarrow \text{HSO}_5^- + \text{OH}^-$                                                                            | 2.3E8                 |             | Buxton et al. (1996)                              |
| A9105_a01 | TrAa01S         | $\text{SO}_5^- + \text{SO}_3^{2-} \rightarrow .72 \text{SO}_4^- + .72 \text{SO}_4^{2-} + .28 \text{SO}_3^- + .28 \text{HSO}_5^- + .28 \text{OH}^-$ | 1.3E7                 |             | Huie and Neta (1987), Deister and Warneck (1990)* |
| A9106_a01 | TrAa01S         | $\text{SO}_5^- + \text{SO}_5^- \rightarrow \text{O}_2 + \text{SO}_4^{2-}$                                                                          | 1.0E8                 |             | Ross et al. (1992)*                               |
| A9200_a01 | TrAa01SSc       | $\text{SO}_3^{2-} + \text{OH}^- \rightarrow \text{SO}_3^- + \text{OH}^-$                                                                           | 5.5E9                 |             | Buxton et al. (1988)                              |
| A9201_a01 | TrAa01SSc       | $\text{SO}_4^- + \text{OH}^- \rightarrow \text{HSO}_5^-$                                                                                           | 1.0E9                 |             | Jiang et al. (1992)                               |
| A9202_a01 | TrAa01SSc       | $\text{SO}_4^- + \text{HO}_2 \rightarrow \text{SO}_4^{2-} + \text{H}^+$                                                                            | 3.5E9                 |             | Jiang et al. (1992)                               |
| A9203_a01 | TrAa01SSc       | $\text{SO}_4^- + \text{H}_2\text{O} \rightarrow \text{SO}_4^{2-} + \text{H}^+ + \text{OH}^-$                                                       | 1.1E1                 | -1110       | Herrmann et al. (1995)                            |
| A9204_a01 | TrAa01SSc       | $\text{SO}_4^- + \text{H}_2\text{O}_2 \rightarrow \text{SO}_4^{2-} + \text{H}^+ + \text{HO}_2$                                                     | 1.2E7                 |             | Wine et al. (1989)                                |

Table 8: Aqueous phase reactions (...continued)

| #         | labels          | reaction                                                                                                                                        | $k_0 [M^{1-n}s^{-1}]$ | $-E_a/R[K]$ | reference                     |
|-----------|-----------------|-------------------------------------------------------------------------------------------------------------------------------------------------|-----------------------|-------------|-------------------------------|
| A9205_a01 | TrAa01SSc       | $\text{HSO}_3^- + \text{O}_2^- \rightarrow \text{SO}_4^{2-} + \text{OH}^-$                                                                      | 3.0E3                 |             | see note                      |
| A9206_a01 | TrAa01SMblScScm | $\text{HSO}_3^- + \text{O}_3 \rightarrow \text{SO}_4^{2-} + \text{H}^+$                                                                         | 3.7E5                 | -5500       | Hoffmann (1986)               |
| A9207_a01 | TrAa01SSc       | $\text{HSO}_3^- + \text{OH}^- \rightarrow \text{SO}_3^-$                                                                                        | 4.5E9                 |             | Buxton et al. (1988)          |
| A9208_a01 | TrAa01SSc       | $\text{HSO}_3^- + \text{HO}_2 \rightarrow \text{SO}_4^{2-} + \text{OH}^- + \text{H}^+$                                                          | 3.0E3                 |             | see note                      |
| A9209_a01 | TrAa01SMblScScm | $\text{HSO}_3^- + \text{H}_2\text{O}_2 \rightarrow \text{SO}_4^{2-} + \text{H}^+$                                                               | 5.2E6                 | -3650       | Martin and Damschen (1981)    |
| A9210_a01 | TrAa01SSc       | $\text{HSO}_3^- + \text{SO}_4^- \rightarrow \text{SO}_3^- + \text{SO}_4^{2-} + \text{H}^+$                                                      | 8.0E8                 |             | Huie and Neta (1987)          |
| A9211_a01 | TrAa01S         | $\text{HSO}_3^- + \text{SO}_5^- \rightarrow .75 \text{SO}_4^- + .75 \text{SO}_4^{2-} + .75 \text{H}^+ + .25 \text{SO}_3^- + .25 \text{HSO}_5^-$ | 1.0E5                 |             | Huie and Neta (1987)          |
| A9212_a01 | TrAa01SSc       | $\text{HSO}_3^- + \text{HSO}_5^- + \text{H}^+ \rightarrow 2 \text{HSO}_4^- + \text{H}^+$                                                        | 7.1E6                 |             | Betterton and Hoffmann (1988) |
| A9300_a01 | TrAa01SSc       | $\text{SO}_3^{2-} + \text{NO}_2 \rightarrow \text{SO}_4^{2-} + 2 \text{HONO} - \text{NO}_2$                                                     | 2.0E7                 |             | Clifton et al. (1988)         |
| A9301_a01 | TrAa01SSc       | $\text{SO}_4^- + \text{NO}_3^- \rightarrow \text{SO}_4^{2-} + \text{NO}_3$                                                                      | 5.0E4                 |             | Exner et al. (1992)           |
| A9302_a01 | TrAa01SSc       | $\text{SO}_4^{2-} + \text{NO}_3 \rightarrow \text{NO}_3^- + \text{SO}_4^-$                                                                      | 1.0E5                 |             | Logager et al. (1993)         |
| A9303_a01 | TrAa01SSc       | $\text{HSO}_3^- + \text{NO}_2 \rightarrow \text{HSO}_4^- + 2 \text{HONO} - \text{NO}_2$                                                         | 2.0E7                 |             | Clifton et al. (1988)         |
| A9304_a01 | TrAa01SSc       | $\text{HSO}_3^- + \text{NO}_3 \rightarrow \text{SO}_3^- + \text{NO}_3^- + \text{H}^+$                                                           | 1.4E9                 | -2000       | Exner et al. (1992)           |
| A9305_a01 | TrAa01SSc       | $\text{HSO}_3^- + \text{HNO}_4 \rightarrow \text{HSO}_4^- + \text{NO}_3^- + \text{H}^+$                                                         | 3.1E5                 |             | Warneck (1999)                |
| A9400_a01 | TrAa01SSc       | $\text{SO}_3^{2-} + \text{HCHO} \rightarrow \text{CH}_2\text{OHSO}_3^- + \text{OH}^-$                                                           | 1.4E4                 |             | Boyce and Hoffmann (1984)     |
| A9401_a01 | TrAa01SSc       | $\text{SO}_3^{2-} + \text{CH}_3\text{OOH} + \text{H}^+ \rightarrow \text{SO}_4^{2-} + \text{H}^+ + \text{CH}_3\text{OH}$                        | 1.6E7                 | -3800       | Lind et al. (1987)            |
| A9402_a01 | TrAa01SSc       | $\text{HSO}_3^- + \text{HCHO} \rightarrow \text{CH}_2\text{OHSO}_3^-$                                                                           | 4.3E-1                |             | Boyce and Hoffmann (1984)     |
| A9403_a01 | TrAa01SSc       | $\text{HSO}_3^- + \text{CH}_3\text{OOH} + \text{H}^+ \rightarrow \text{HSO}_4^- + \text{H}^+ + \text{CH}_3\text{OH}$                            | 1.6E7                 | -3800       | Lind et al. (1987)            |
| A9404_a01 | TrAa01SSc       | $\text{CH}_2\text{OHSO}_3^- + \text{OH}^- \rightarrow \text{SO}_3^{2-} + \text{HCHO}$                                                           | 3.6E3                 |             | Seinfeld and Pandis (1998)    |
| A9600_a01 | TrAa01SCL       | $\text{SO}_3^{2-} + \text{Cl}_2^- \rightarrow \text{SO}_3^- + 2 \text{Cl}^-$                                                                    | 6.2E7                 |             | Jacobi et al. (1996)          |
| A9601_a01 | TrAa01SCLMbl    | $\text{SO}_3^{2-} + \text{HOCl} \rightarrow \text{Cl}^- + \text{HSO}_4^-$                                                                       | 7.6E8                 |             | Fogelman et al. (1989)        |
| A9602_a01 | TrAa01SCL       | $\text{SO}_4^- + \text{Cl}^- \rightarrow \text{SO}_4^{2-} + \text{Cl}$                                                                          | 2.5E8                 |             | Buxton et al. (1999a)         |
| A9603_a01 | TrAa01SCL       | $\text{SO}_4^{2-} + \text{Cl} \rightarrow \text{SO}_4^- + \text{Cl}^-$                                                                          | 2.1E8                 |             | Buxton et al. (1999a)         |
| A9604_a01 | TrAa01SCL       | $\text{HSO}_3^- + \text{Cl}_2^- \rightarrow \text{SO}_3^- + 2 \text{Cl}^- + \text{H}^+$                                                         | 4.7E8                 | -1082       | Shoute et al. (1991)          |
| A9605_a01 | TrAa01SCLMbl    | $\text{HSO}_3^- + \text{HOCl} \rightarrow \text{Cl}^- + \text{HSO}_4^- + \text{H}^+$                                                            | 7.6E8                 |             | see note                      |
| A9606_a01 | TrAa01SCL       | $\text{HSO}_5^- + \text{Cl}^- \rightarrow \text{HOCl} + \text{SO}_4^{2-}$                                                                       | 1.8E-3                | -7352       | Fortnum et al. (1960)         |
| A9700_a01 | TrAa01SBr       | $\text{SO}_3^{2-} + \text{Br}_2^- \rightarrow 2 \text{Br}^- + \text{SO}_3^-$                                                                    | 2.2E8                 | -649        | Shoute et al. (1991)          |
| A9701_a01 | TrAa01SBr       | $\text{SO}_3^{2-} + \text{BrO}^- \rightarrow \text{Br}^- + \text{SO}_4^{2-}$                                                                    | 1.0E8                 |             | Troy and Margerum (1991)      |
| A9702_a01 | TrAa01SBrMbl    | $\text{SO}_3^{2-} + \text{HOBr} \rightarrow \text{Br}^- + \text{HSO}_4^-$                                                                       | 5.0E9                 |             | Troy and Margerum (1991)      |
| A9703_a01 | TrAa01SBr       | $\text{SO}_4^- + \text{Br}^- \rightarrow \text{Br} + \text{SO}_4^{2-}$                                                                          | 2.1E9                 |             | Jacobi (1996)                 |
| A9704_a01 | TrAa01SBr       | $\text{HSO}_3^- + \text{Br}_2^- \rightarrow 2 \text{Br}^- + \text{H}^+ + \text{SO}_3^-$                                                         | 6.3E7                 | -782        | Shoute et al. (1991)          |
| A9705_a01 | TrAa01SBrMbl    | $\text{HSO}_3^- + \text{HOBr} \rightarrow \text{Br}^- + \text{HSO}_4^- + \text{H}^+$                                                            | 5.0E9                 |             | see note                      |
| A9706_a01 | TrAa01SBr       | $\text{HSO}_5^- + \text{Br}^- \rightarrow \text{HOBr} + \text{SO}_4^{2-}$                                                                       | 1.0E0                 | -5338       | Fogelman et al. (1989)        |



Table 8: Aqueous phase reactions (...continued)

| #          | labels     | reaction                                            | $k_0 [M^{1-n} s^{-1}]$ | $-E_a/R[K]$ | reference                 |
|------------|------------|-----------------------------------------------------|------------------------|-------------|---------------------------|
| A9800_a01  | TrAa01SI   | $HSO_3^- + I_2 \rightarrow 2 I^- + HSO_4^- + 2 H^+$ | 1.7E9                  |             | Yiin and Margerum (1990)  |
| A10100_a01 | TrAa01Hg   | $Hg + O_3 \rightarrow HgO + O_2$                    | 4.7E7                  |             | Munthe (1992)             |
| A10200_a01 | TrAa01Hg   | $HgO + H^+ \rightarrow Hg^{2+} + OH^-$              | 1.0E10                 |             | Pleijel and Munthe (1995) |
| A10201_a01 | TrAa01Hg   | $Hg + OH \rightarrow Hg^+ + OH^-$                   | 2.0E9                  |             | Lin and Pehkonen (1997)   |
| A10202_a01 | TrAa01Hg   | $Hg^+ + OH \rightarrow Hg^{2+} + OH^-$              | 1.0E10                 |             | Lin and Pehkonen (1997)   |
| A10203_a01 | TrAa01Hg   | $Hg^{2+} + HO_2 \rightarrow Hg^+ + O_2 + H^+$       | 1.7E4                  |             | Enami et al. (2007)       |
| A10204_a01 | TrAa01Hg   | $Hg^+ + HO_2 \rightarrow Hg + O_2 + H^+$            | 1.0E10                 |             | Lin and Pehkonen (1997)*  |
| A10600_a01 | TrAa01HgCl | $Hg + HOCl \rightarrow Hg^{2+} + Cl^- + OH^-$       | 2.09E6                 |             | Lin and Pehkonen (1998)   |
| A10601_a01 | TrAa01HgCl | $Hg + ClO^- \rightarrow Hg^{2+} + Cl^- + OH^-$      | 1.99E6                 |             | Lin and Pehkonen (1998)*  |
| A10700_a01 | TrAa01HgBr | $Hg + HOBr \rightarrow Hg^{2+} + Br^- + OH^-$       | 0.279                  |             | Wang and Pehkonen (2004)  |
| A10701_a01 | TrAa01HgBr | $Hg + BrO^- \rightarrow Hg^{2+} + Br^- + OH^-$      | 0.273                  |             | Wang and Pehkonen (2004)* |
| A10702_a01 | TrAa01HgBr | $Hg + Br_2 \rightarrow Hg^{2+} + 2 Br^-$            | 0.196                  |             | Wang and Pehkonen (2004)  |
| A10900_a01 | TrAa01HgS  | $HgSO_3 \rightarrow Hg + HSO_4^- + H^+$             | 0.0106                 |             | van Loon et al. (2000)    |

\*Notes:

A6102: Jacobi (1996) found an upper limit of 6E9 and cite an upper limit from another study of 2E9. Here, we set the rate coefficient to 1E9.

A6301: There is also an earlier study by Exner et al. (1992) which found a smaller rate coefficient but did not consider the back reaction.

A7400: Assumed to be the same as for  $Br_2^- + H_2O_2$ .

A9105: The rate coefficient for the sum of the paths (leading to either  $HSO_5^-$  or  $SO_4^{2-}$ ) is from Huie and Neta (1987), the ratio 0.28/0.72 is from Deister and Warneck (1990).

A9106: See also: (Huie and Neta, 1987; Warneck, 1991). If this reaction produces a lot of  $SO_4^{2-}$ , it will have an effect. However, we currently assume only the stable

$S_2O_8^{2-}$  as product. Since  $S_2O_8^{2-}$  is not treated explicitly in the mechanism, we use  $SO_4^{2-}$  as a proxy. Note that this destroys the mass consistency for sulfur species.

A9205: D. Sedlak, pers. comm. (1993).

A9208: D. Sedlak, pers. comm. (1993).

A9605: assumed to be the same as for  $SO_3^{2-} + HOCl$ .

A9705: assumed to be the same as for  $SO_3^{2-} + HOBr$ .

## References

- Abbatt, J. P. D. and Waschewsky, G. C. G.: Heterogeneous interactions of HOBr, HNO<sub>3</sub>, O<sub>3</sub>, and NO<sub>2</sub> with deliquescent NaCl aerosols at room temperature, *J. Phys. Chem. A*, 102, 3719–3725, 1998.
- Ammann, M. and Pöschl, U.: Kinetic model framework for aerosol and cloud surface chemistry and gas-particle interactions - Part 2: exemplary practical applications and numerical simulations, *Atmos. Chem. Phys.*, 7, 6025–6045, 2007.
- Anderson, L. C. and Fahey, D. W.: Studies with ClONO<sub>2</sub>: Thermal dissociation rate and catalytic conversion to NO using an NO/O<sub>3</sub> chemiluminescence detector, *J. Phys. Chem.*, 94, 644–652, 1990.
- Aranda, A., Le Bras, G., La Verdet, G., and Poulet, G.: The BrO + CH<sub>3</sub>O<sub>2</sub> reaction: Kinetics and role in the atmospheric ozone budget, *Geophys. Res. Lett.*, 24, 2745–2748, 1997.
- Ariya, P. A., Khalizov, A., and Gidas, A.: Reactions of gaseous mercury with atomic and molecular halogens: Kinetics, product studies, and atmospheric implications, *J. Phys. Chem. A*, 106, 7310–7320, 2002.
- Atkinson, R.: Gas-phase tropospheric chemistry of volatile organic compounds: 1. Alkanes and alkenes, *J. Phys. Chem. Ref. Data*, 26, 215–290, 1997.
- Atkinson, R.: Kinetics of the gas-phase reactions of OH radicals with alkanes and cycloalkanes, *Atmos. Chem. Phys.*, 3, 2233–2307, 2003.
- Atkinson, R., Baulch, D. L., Cox, R. A., Hampson, Jr., R. F., Kerr, J. A., Rossi, M. J., and Troe, J.: Summary of evaluated kinetic and photochemical data for atmospheric chemistry: Web version August 1999, <http://www.iupac-kinetic.ch.cam.ac.uk>, 1999.
- Atkinson, R., Baulch, D. L., Cox, R. A., Crowley, J. N., Hampson, R. F., Hynes, R. G., Jenkin, M. E., Rossi, M. J., and Troe, J.: Evaluated kinetic and photochemical data for atmospheric chemistry: Volume I – gas phase reactions of O<sub>x</sub>, HO<sub>x</sub>, NO<sub>x</sub> and SO<sub>x</sub> species, *Atmos. Chem. Phys.*, 4, 1461–1738, 2004.
- Atkinson, R., Baulch, D. L., Cox, R. A., Crowley, J. N., Hampson, Jr., R. F., Hynes, R. G., Jenkin, M. E., Kerr, J. A., Rossi, M. J., and Troe, J.: Summary of evaluated kinetic and photochemical data for atmospheric chemistry: Web version March 2005, <http://www.iupac-kinetic.ch.cam.ac.uk>, 2005.
- Atkinson, R., Baulch, D. L., Cox, R. A., Crowley, J. N., Hampson, R. F., Hynes, R. G., Jenkin, M. E., Rossi, M. J., and Troe, J.: Evaluated kinetic and photochemical data for atmospheric chemistry: Volume II – gas phase reactions of organic species, *Atmos. Chem. Phys.*, 6, 3625–4055, 2006.
- Atkinson, R., Baulch, D. L., Cox, R. A., Crowley, J. N., Hampson, R. F., Hynes, R. G., Jenkin, M. E., Rossi, M. J., and Troe, J.: Evaluated kinetic and photochemical data for atmospheric chemistry: Volume III – gas phase reactions of inorganic halogens, *Atmos. Chem. Phys.*, 7, 981–1191, 2007.
- Bale, C. S. E., Canosa-Mas, C. E., Shallcross, D. E., and Wayne, R. P.: A discharge-flow study of the kinetics of the reactions of IO with CH<sub>3</sub>O<sub>2</sub> and CF<sub>3</sub>O<sub>2</sub>, *Phys. Chem. Chem. Phys.*, 7, 2164–2172, 2005.
- Barker, G. C., Fowles, P., and Stringer, B.: Pulse radiolytic induced transient electrical conductance in liquid solutions, *Trans. Faraday Soc.*, 66, 1509–1519, 1970.
- Barone, S. B., Turnipseed, A. A., and Ravishankara, A. R.: Role of adducts in the atmospheric oxidation of dimethyl sulfide, *Faraday Discuss.*, 100, 39–54, 1995.
- Bartlett, W. P. and Margerum, D. W.: Temperature dependencies of the Henry’s law constant and the aqueous phase dissociation constant of bromine chloride, *Environ. Sci. Technol.*, 33, 3410–3414, 1999.
- Beckwith, R. C., Wang, T. X., and Margerum, D. W.: Equilibrium and kinetics of bromine hydrolysis, *Inorg. Chem.*, 35, 995–1000, 1996.
- Bedjanian, Y., Laverdet, G., and Le Bras, G.: Low-pressure study of the reaction of Cl atoms with isoprene, *J. Phys. Chem. A*, 102, 953–959, 1998.
- Behnke, W., Scheer, V., and Zetzsch, C.: Production of BrNO<sub>2</sub>, Br<sub>2</sub> and ClNO<sub>2</sub> from the reaction between sea spray aerosol and N<sub>2</sub>O<sub>5</sub>, *J. Aerosol Sci.*, 25, S277–S278, 1994.
- Behnke, W., George, C., Scheer, V., and Zetzsch, C.: Production and decay of ClNO<sub>2</sub> from the reaction of gaseous N<sub>2</sub>O<sub>5</sub> with NaCl solution: Bulk and aerosol experiments, *J. Geophys. Res.*, 102D, 3795–3804, 1997.
- Betterton, E. A. and Hoffmann, M. R.: Oxidation of aqueous SO<sub>2</sub> by peroxy monosulfate, *J. Phys. Chem.*, 92, 5962–5965, 1988.
- Bichsel, Y. and von Gunten, U.: Oxidation of iodide and hypiodous acid in the disinfection of natural waters, *Environ. Sci. Technol.*, 33, 4040–4045, 1999.
- Bjergbakke, E., Navartnam, S., Parsons, B. J., and Swallow, A. J.: Reaction between HO<sub>2</sub>· and chlorine in aqueous solution, *J. Am. Chem. Soc.*, 103, 5926–5928, 1981.

- Boyce, S. D. and Hoffmann, M. R.: Kinetics and mechanism of the formation of hydroxymethanesulfonic acid at low pH, *J. Phys. Chem.*, 88, 4740–4746, 1984.
- Braban, C. F., Adams, J. W., Rodriguez, D., Cox, R. A., Crowley, J. N., and Schuster, G.: Heterogeneous reactions of HOI, ICl and IBr on sea salt and sea salt proxies, *Phys. Chem. Chem. Phys.*, 9, 3136–3148, 2007.
- Brimblecombe, P. and Clegg, S. L.: Erratum, *J. Atmos. Chem.*, 8, 95, 1989.
- Burkholder, J. B., Orlando, J. J., and Howard, C. J.: Ultraviolet absorption cross sections of Cl<sub>2</sub>O<sub>2</sub> between 210 and 410 nm, *J. Phys. Chem.*, 94, 687–695, 1990.
- Buxton, G. V., Kilner, C., and Sellers, R. M.: Pulse radiolysis of HOI and IO<sup>-</sup> in aqueous solution. Formation and characterization of I(II), *Proc. Tihany Symp. Radiat. Chem.*, 6, 155–159, 1986.
- Buxton, G. V., Greenstock, C. L., Helman, W. P., and Ross, A. B.: Critical review of rate constants for reactions of hydrated electrons, hydrogen atoms and hydroxyl radicals ( $\cdot\text{OH}/\cdot\text{O}^-$ ) in aqueous solution, *J. Phys. Chem. Ref. Data*, 17, 513–886, 1988.
- Buxton, G. V., McGowan, S., Salmon, G. A., Williams, J. E., and Wood, N. D.: A study of the spectra and reactivity of oxysulphur-radical anions involved in the chain oxidation of S(IV): A pulse and  $\gamma$ -radiolysis study, *Atmos. Environ.*, 30, 2483–2493, 1996.
- Buxton, G. V., Bydder, M., and Salmon, G. A.: The reactivity of chlorine atoms in aqueous solution: Part II. The equilibrium  $\text{SO}_4^- + \text{Cl}^- \rightleftharpoons \text{Cl} + \text{SO}_4^{2-}$ , *Phys. Chem. Chem. Phys.*, 1, 269–273, 1999a.
- Buxton, G. V., Salmon, G. A., and Wang, J. Q.: The equilibrium  $\text{NO}_3 + \text{Cl}^- \rightleftharpoons \text{NO}_3^- + \text{Cl}$ : A laser flash photolysis and pulse radiolysis study of the reactivity of NO<sub>3</sub> with chloride ion in aqueous solution, *Phys. Chem. Chem. Phys.*, 1, 3589–3593, 1999b.
- Calvert, J. G. and Lindberg, S. E.: A modeling study of the mechanism of the halogen-ozone-mercury homogeneous reactions in the troposphere during the polar spring, *Atmos. Environ.*, 37, 4467–4481, 2003.
- Canosa-Mas, C. E., King, M. D., Lopez, R., Percival, C. J., Wayne, R. P., Shallcross, D. E., Pyle, J. A., and Daele, V.: Is the reaction between CH<sub>3</sub>(O)O<sub>2</sub> and NO<sub>3</sub> important in the night-time troposphere?, *J. Chem. Soc. Faraday Trans.*, 92, 2211–2222, 1996.
- Carl, S. A. and Crowley, J. N.: 298 K rate coefficients for the reaction of OH with *i*-C<sub>3</sub>H<sub>7</sub>I, *n*-C<sub>3</sub>H<sub>7</sub>I and C<sub>3</sub>H<sub>8</sub>, *Atmos. Chem. Phys.*, 1, 1–7, 2001.
- Chameides, W. L.: The photochemistry of a remote marine stratiform cloud, *J. Geophys. Res.*, 89D, 4739–4755, 1984.
- Chatfield, R. B. and Crutzen, P. J.: Are there interactions of iodine and sulfur species in marine air photochemistry?, *J. Geophys. Res.*, 95D, 22 319–22 341, 1990.
- Chin, M. and Wine, P. H.: A temperature-dependent competitive kinetics study of the aqueous-phase reactions of OH radicals with formate, formic acid, acetate, acetic acid, and hydrated formaldehyde, in: *Aquatic and Surface Photochemistry*, edited by Helz, G. R., Zepp, R. G., and Crosby, D. G., pp. 85–96, A. F. Lewis, NY, 1994.
- Chinake, C. R. and Simoyi, R. H.: Kinetics and mechanism of the complex bromate-iodine reaction, *J. Phys. Chem.*, 100, 1643–1656, 1996.
- Christensen, H. and Sehested, K.: HO<sub>2</sub> and O<sub>2</sub><sup>-</sup> radicals at elevated temperatures, *J. Phys. Chem.*, 92, 3007–3011, 1988.
- Christensen, H., Sehested, K., and Corfitzen, H.: Reactions of hydroxyl radicals with hydrogen peroxide at ambient and elevated temperatures, *J. Phys. Chem.*, 86, 1588–1590, 1982.
- Christensen, L. E., Okumura, M., Sander, S. P., Salawitch, R. J., Toon, G. C., Sen, B., Blavier, J.-F., and Jucks, K. W.: Kinetics of HO<sub>2</sub> + HO<sub>2</sub> → H<sub>2</sub>O<sub>2</sub> + O<sub>2</sub>: Implications for stratospheric H<sub>2</sub>O<sub>2</sub>, *Geophys. Res. Lett.*, 29, doi:10.1029/2001GL014525, 2002.
- Citri, O. and Epstein, I. R.: Mechanistic study of a coupled chemical oscillator: the bromate-chlorite-iodide reaction, *J. Phys. Chem.*, 92, 1865–1871, 1988.
- Clifton, C. L., Altstein, N., and Huie, R. E.: Rate constant for the reaction of NO<sub>2</sub> with sulfur(IV) over the pH range 5.3–13, *Environ. Sci. Technol.*, 22, 586–589, 1988.
- Clyne, M. A. A. and Cruse, H. W.: Atomic resonance fluorescence spectrometry for the rate constants of rapid bimolecular reactions. Part 2. Reactions Cl + BrCl, Cl + Br<sub>2</sub>, Cl + ICl, Br + IBr, Br + ICl, *J. Chem. Soc. Faraday Trans. 2*, 68, 1377–1387, 1972.
- Damschen, D. E. and Martin, L. R.: Aqueous aerosol oxidation of nitrous acid by O<sub>2</sub>, O<sub>3</sub> and H<sub>2</sub>O<sub>2</sub>, *Atmos. Environ.*, 17, 2005–2011, 1983.
- Davidovits, P., Hu, J. H., Worsnop, D. R., Zahniser, M. S., and Kolb, C. E.: Entry of gas molecules into liquids, *Faraday Discuss.*, 100, 65–81, 1995.
- Davis, Jr., W. and de Bruin, H. J.: New activity coefficients of 0–100 per cent aqueous nitric acid, *J. Inorg. Nucl. Chem.*, 26, 1069–1083, 1964.

- De Bruyn, W. J., Shorter, J. A., Davidovits, P., Worsnop, D. R., Zahniser, M. S., and Kolb, C. E.: Uptake of gas-phase sulfur species methanesulfonic acid, dimethylsulfoxide, and dimethyl sulfone by aqueous surfaces, *J. Geophys. Res.*, 99D, 16 927–16 932, 1994.
- Deiber, G., George, C., Le Calvé, S., Schweitzer, F., and Mirabel, P.: Uptake study of ClONO<sub>2</sub> and BrONO<sub>2</sub> by halide containing droplets, *Atmos. Chem. Phys.*, 4, 1291–1299, 2004.
- Deister, U. and Warneck, P.: Photooxidation of SO<sub>3</sub><sup>2-</sup> in aqueous solution, *J. Phys. Chem.*, 94, 2191–2198, 1990.
- DeMore, W. B., Sander, S. P., Golden, D. M., Hampson, R. F., Kurylo, M. J., Howard, C. J., Ravishankara, A. R., Kolb, C. E., and Molina, M. J.: Chemical kinetics and photochemical data for use in stratospheric modeling. Evaluation number 12, JPL Publication 97-4, Jet Propulsion Laboratory, Pasadena, CA, 1997.
- Dickson, A. G. and Millero, F. J.: A comparison of the equilibrium constants for the dissociation of carbonic acid in seawater media, *Deep-Sea Res. A*, 34, 1733–1743, 1987.
- Dillon, T. J., Karunanandan, R., and Crowley, J. N.: The reaction of IO with CH<sub>3</sub>SCH<sub>3</sub>: Products and temperature dependent rate coefficients by laser induced fluorescence, *Phys. Chem. Chem. Phys.*, 8, 847–855, 2006a.
- Dillon, T. J., Tucceri, M. E., and Crowley, J. N.: Laser induced fluorescence studies of iodine oxide chemistry. Part II. The reactions of IO with CH<sub>3</sub>O<sub>2</sub>, CF<sub>3</sub>O<sub>2</sub> and O<sub>3</sub>, *Phys. Chem. Chem. Phys.*, 8, 5185–5198, 2006b.
- Dillon, T. J., Tucceri, M. E., Sander, R., and Crowley, J. N.: LIF studies of iodine oxide chemistry, part 3. Reactions IO + NO<sub>3</sub> → OIO + NO<sub>2</sub>, I + NO<sub>3</sub> → IO + NO<sub>2</sub>, and CH<sub>2</sub>I + O<sub>2</sub> → (products): Implications for the chemistry of the marine atmosphere at night., *Phys. Chem. Chem. Phys.*, 10, 1540–1554, 2008.
- Dolson, D. A. and Leone, S. R.: A reinvestigation of the laser-initiated chlorine/hydrogen bromide chain reaction: absolute rate constants and the v = 2/v = 1 ratio from chlorine atom + hydrogen bromide → hydrogen chloride(v) + bromine atom, *J. Phys. Chem.*, 91, 3543–3550, 1987.
- Donohoue, D. L., Bauer, D., Cossairt, B., and Hynes, A. J.: Temperature and pressure dependent rate coefficients for the reaction of Hg with Br and the reaction of Br with Br: a pulsed laser photolysis-pulsed laser induced fluorescence study, *J. Phys. Chem. A*, 110, 6623–6632, 2006.
- Edblom, E. C., Györgyi, L., Orbán, M., and Epstein, I. R.: A mechanism for dynamical behavior in the Landolt reaction with ferrocyanide, *J. Am. Chem. Soc.*, 109, 4876–4880, 1987.
- Eigen, M. and Kustin, K.: The kinetics of halogen hydrolysis, *J. Am. Chem. Soc.*, 84, 1355–1361, 1962.
- Enami, S., Hoshino, Y., and Kawasaki, M.: A kinetic study of the gas-phase reactions of OIO with NO, NO<sub>2</sub>, and Cl<sub>2</sub>, *Int. J. Chem. Kinetics*, 39, 688–693, 2007.
- Exner, M., Herrmann, H., and Zellner, R.: Laser-based studies of reactions of the nitrate radical in aqueous solution, *Ber. Bunsenges. Phys. Chem.*, 96, 470–477, 1992.
- Faria, R. B., Lengyel, I., Epstein, I. R., and Kustin, K.: Combined mechanism explaining nonlinear dynamics in bromine(III) and bromine(V) oxidations of iodide ion, *J. Phys. Chem.*, 97, 1164–1171, 1993.
- Fogelman, K. D., Walker, D. M., and Margerum, D. W.: Non-metal redox kinetics: Hypochlorite and hypochlorous acid reactions with sulfite, *Inorg. Chem.*, 28, 986–993, 1989.
- Fortnum, D. H., Battaglia, C. J., Cohen, S. R., and Edwards, J. O.: The kinetics of the oxidation of halide ions by monosubstituted peroxides, *J. Am. Chem. Soc.*, 82, 778–782, 1960.
- Furrow, S.: Reactions of iodine intermediates in iodate-hydrogen peroxide oscillators, *J. Phys. Chem.*, 91, 2129–2135, 1987.
- Haag, W. R. and Hoigné, J.: Ozonation of bromide-containing waters: Kinetics of formation of hypobromous acid and bromate, *Environ. Sci. Technol.*, 17, 261–267, 1983.
- Hall, B.: The gas phase oxidation of elemental mercury by ozone, *Water Air Soil Pollut.*, 80, 301–315, 1995.
- Hanson, D. R., Burkholder, J. B., Howard, C. J., and Ravishankara, A. R.: Measurement of OH and HO<sub>2</sub> radical uptake coefficients on water and sulfuric acid surfaces, *J. Phys. Chem.*, 96, 4979–4985, 1992.
- Herrmann, H., Reese, A., and Zellner, R.: Time resolved UV/VIS diode array absorption spectroscopy of SO<sub>x</sub><sup>-</sup> (x=3, 4, 5) radical anions in aqueous solution, *J. Mol. Struct.*, 348, 183–186, 1995.
- Herrmann, H., Ervens, B., Nowacki, P., Wolke, R., and Zellner, R.: A chemical aqueous phase radical mechanism for tropospheric chemistry, *Chemosphere*, 38, 1223–1232, 1999.

- Hoffmann, M. R.: On the kinetics and mechanism of oxidation of aquated sulfur dioxide by ozone, *Atmos. Environ.*, 20, 1145–1154, 1986.
- Hoigné, J., Bader, H., Haag, W. R., and Staehelin, J.: Rate constants of reactions of ozone with organic and inorganic compounds in water – III Inorganic compounds and radicals, *Wat. Res.*, 19, 993–1004, 1985.
- Holmes, N. S., Adams, J. W., and Crowley, J. N.: Uptake and reaction of HOI and IONO<sub>2</sub> on frozen and dry NaCl/NaBr surfaces and H<sub>2</sub>SO<sub>4</sub>, *Phys. Chem. Chem. Phys.*, 3, 1679–1687, 2001.
- Hu, J. H., Shi, Q., Davidovits, P., Worsnop, D. R., Zahniser, M. S., and Kolb, C. E.: Reactive uptake of Cl<sub>2</sub>(g) and Br<sub>2</sub>(g) by aqueous surfaces as a function of Br<sup>-</sup> and I<sup>-</sup> ion concentration: The effect of chemical reaction at the interface, *J. Phys. Chem.*, 99, 8768–8776, 1995.
- Huie, R. E. and Neta, P.: Rate constants for some oxidations of S(IV) by radicals in aqueous solutions, *Atmos. Environ.*, 21, 1743–1747, 1987.
- Huthwelker, T., Clegg, S. L., Peter, T., Carslaw, K., Luo, B. P., and Brimblecombe, P.: Solubility of HOCl in water and aqueous H<sub>2</sub>SO<sub>4</sub> to stratospheric temperatures, *J. Atmos. Chem.*, 21, 81–95, 1995.
- Hynes, A. J. and Wine, P. H.: The atmospheric chemistry of dimethylsulfoxide (DMSO) kinetics and mechanism of the OH + DMSO reaction, *J. Atmos. Chem.*, 24, 23–37, 1996.
- Ingham, T., Bauer, D., Sander, R., Crutzen, P. J., and Crowley, J. N.: Kinetics and products of the reactions BrO + DMS and Br + DMS at 298 K, *J. Phys. Chem. A*, 103, 7199–7209, 1999.
- Jacob, D. J.: Chemistry of OH in remote clouds and its role in the production of formic acid and peroxy-monosulfate, *J. Geophys. Res.*, 91D, 9807–9826, 1986.
- Jacobi, H.-W.: Kinetische Untersuchungen und Modellrechnungen zur troposphärischen Chemie von Radikalanionen und Ozon in wäßriger Phase, Ph.D. thesis, Universität GH Essen, Germany, 1996.
- Jacobi, H.-W., Herrmann, H., and Zellner, R.: Kinetic investigation of the Cl<sub>2</sub><sup>-</sup> radical in the aqueous phase, in: *Air Pollution Research Report 57: Homogenous and heterogenous chemical Processes in the Troposphere*, edited by Mirabel, P., pp. 172–176, Office for official Publications of the European Communities, Luxembourg, 1996.
- Jayne, J. T., Duan, S. X., Davidovits, P., Worsnop, D. R., Zahniser, M. S., and Kolb, C. E.: Uptake of gas-phase alcohol and organic acid molecules by water surfaces, *J. Phys. Chem.*, 95, 6329–6336, 1991.
- Jefferson, A., Nicovich, J. M., and Wine, P. H.: Temperature-dependent kinetics studies of the reactions Br(<sup>2</sup>P<sub>3/2</sub>) + CH<sub>3</sub>SCH<sub>3</sub> ↔ CH<sub>3</sub>SCH<sub>2</sub> + HBr. Heat of formation of the CH<sub>3</sub>SCH<sub>2</sub> radical, *J. Phys. Chem.*, 98, 7128–7135, 1994.
- Jiang, P.-Y., Katsumura, Y., Nagaishi, R., Domae, M., Ishikawa, K., Ishigure, K., and Yoshida, Y.: Pulse radiolysis study of concentrated sulfuric acid solutions. Formation mechanism, yield and reactivity of sulfate radicals, *J. Chem. Soc. Faraday Trans.*, 88, 1653–1658, 1992.
- Keller-Rudek, H., Koschel, D., Merlet, P., Ohms-Bredemann, U., Wagner, J., and Wietelmann, A.: *Gmelin Handbook of Inorganic and Organometallic Chemistry*, 8th Edition, Br, Bromine, Supplement Volume B2, Compounds with Oxygen and Nitrogen, Springer Verlag, Berlin, 1992.
- Kelley, C. M. and Tartar, H. V.: On the system: bromine-water, *J. Am. Chem. Soc.*, 78, 5752–5756, 1956.
- Kircher, C. C. and Sander, S. P.: Kinetics and mechanism of HO<sub>2</sub> and DO<sub>2</sub> disproportionations, *J. Phys. Chem.*, 88, 2082–2091, 1984.
- Kohlmann, J.-P. and Poppe, D.: The tropospheric gas-phase degradation of NH<sub>3</sub> and its impact on the formation of N<sub>2</sub>O and NO<sub>x</sub>, *J. Atmos. Chem.*, 32, 397–415, 1999.
- Kondo, O. and Benson, S. W.: Kinetics and equilibria in the system Br + CH<sub>3</sub>OOH ⇌ HBr + CH<sub>3</sub>OO. An upper limit for the heat of formation of the methylperoxy radical, *J. Phys. Chem.*, 88, 6675–6680, 1984.
- Kumar, K. and Margerum, D. W.: Kinetics and mechanism of general-acid-assisted oxidation of bromide by hypochlorite and hypochlorous acid, *Inorg. Chem.*, 26, 2706–2711, 1987.
- Lax, E.: *Taschenbuch für Chemiker und Physiker*, Springer Verlag, Berlin, 1969.
- Lee, Y.-N. and Schwartz, S. E.: Reaction kinetics of nitrogen dioxide with liquid water at low partial pressure, *J. Phys. Chem.*, 85, 840–848, 1981.
- Lengyel, I., Li, J., Kustin, K., and Epstein, I. R.: Rate constants for reactions between iodine- and chlorine-containing species: A detailed mechanism of the chlorine dioxide/chlorite reaction, *J. Am. Chem. Soc.*, 118, 3708–3719, 1996.
- Lin, C.-J. and Pehkonen, S. O.: Aqueous free radical chemistry of mercury in the presence of iron oxides

- and ambient aerosol, *Atmos. Environ.*, 31, 4125–4137, 1997.
- Lin, C.-J. and Pehkonen, S. O.: Oxidation of elemental mercury by aqueous chlorine (HOCl/OCl<sup>-</sup>): Implications for tropospheric mercury chemistry, *J. Geophys. Res.*, 103D, 28 093–28 102, 1998.
- Lind, J. A. and Kok, G. L.: Correction to “Henry’s law determinations for aqueous solutions of hydrogen peroxide, methylhydroperoxide, and peroxyacetic acid” by John A. Lind and Gregory L. Kok, *J. Geophys. Res.*, 99D, 21 119, 1994.
- Lind, J. A., Lazrus, A. L., and Kok, G. L.: Aqueous phase oxidation of sulfur(IV) by hydrogen peroxide, methylhydroperoxide, and peroxyacetic acid, *J. Geophys. Res.*, 92D, 4171–4177, 1987.
- Liu, Q. and Margerum, D. W.: Equilibrium and kinetics of bromine chloride hydrolysis, *Environ. Sci. Technol.*, 35, 1127–1133, 2001.
- Liu, Y., Pimentel, A. S., Antoku, Y., Giles, B. J., and Barker, J. R.: Temperature-dependent rate and equilibrium constants for  $\text{Br}\cdot(\text{aq}) + \text{Br}^-(\text{aq}) \rightleftharpoons \text{Br}_2^-(\text{aq})$ , *J. Phys. Chem. A*, 106, 11 075–11 082, 2002.
- Logager, T., Sehested, K., and Holcman, J.: Rate constants of the equilibrium reactions  $\text{SO}_4 + \text{HNO}_3 \rightleftharpoons \text{HSO}_4^- + \text{NO}_3$  and  $\text{SO}_4 + \text{NO}_3 \rightleftharpoons \text{SO}_4^{2-} + \text{NO}_3$ , *Radiat. Phys. Chem.*, 41, 539–543, 1993.
- Long, C. A. and Bielski, B. H. J.: Rate of reaction of superoxide radical with chloride-containing species, *J. Phys. Chem.*, 84, 555–557, 1980.
- Magi, L., Schweitzer, F., Pallares, C., Cherif, S., Mirabel, P., and George, C.: Investigation of the uptake rate of ozone and methyl hydroperoxide by water surfaces, *J. Phys. Chem. A*, 101, 4943–4949, 1997.
- Manion, J. A., Huie, R. E., Levin, R. D., Burgess, Jr., D. R., Orkin, V. L., Tsang, W., McGivern, W. S., Hudgens, J. W., Knyazev, V. D., Atkinson, D. B., Chai, E., Tereza, A. M., Lin, C.-Y., Allison, T. C., Mallard, W. G., Westley, F., Heron, J. T., Hampson, R. F., and Frizzell, D. H.: NIST Chemical Kinetics Database (Web Version), <http://kinetics.nist.gov>, 2010.
- Margerum, D. W., Dickson, P. N., Nagy, J. C., Kumar, K., Bowers, C. P., and Fogelman, K. D.: Kinetics of the iodine monochloride reaction with iodide measured by the pulsed-accelerated-flow method, *Inorg. Chem.*, 25, 4900–4904, 1986.
- Marsh, A. R. W. and McElroy, W. J.: The dissociation constant and Henry’s law constant of HCl in aqueous solution, *Atmos. Environ.*, 19, 1075–1080, 1985.
- Martin, L. R. and Damschen, D. E.: Aqueous oxidation of sulfur dioxide by hydrogen peroxide at low pH, *Atmos. Environ.*, 15, 1615–1621, 1981.
- Matthew, B. M., George, I., and Anastasio, C.: Hydroperoxyl radical (HO<sub>2</sub>·) oxidizes dibromide radical anion ( $\cdot\text{Br}_2^-$ ) to bromine (Br<sub>2</sub>) in aqueous solution: Implications for the formation of Br<sub>2</sub> in the marine boundary layer, *Geophys. Res. Lett.*, 30, doi: 10.1029/2003GL018572, 2003.
- McCabe, D. C., Gierczak, T., Talukdar, R. K., and Ravishankara, A. R.: Kinetics of the reaction OH + CO under atmospheric conditions, *Geophys. Res. Lett.*, 28, 3135–3138, 2001.
- Mössinger, J. C. and Cox, R. A.: Heterogeneous reaction of HOI with sodium halide salts, *J. Phys. Chem. A*, 105, 5165–5177, 2001.
- Munthe, J.: The aqueous oxidation of elemental mercury by ozone, *Atmos. Environ.*, 26A, 1461–1468, 1992.
- Nagy, J. C., Kumar, K., and Margerum, D. W.: Non-metal redox kinetics: Oxidation of iodide by hypochlorous acid and by nitrogen trichloride measured by the pulsed-accelerated-flow method, *Inorg. Chem.*, 27, 2773–2780, 1988.
- Nakano, Y., Ishiwata, T., and Kawasaki, M.: Rate constants of the reaction of NO<sub>3</sub> with CH<sub>3</sub>I measured with use of cavity ring-down spectroscopy, *J. Phys. Chem. A*, 109, 6527–6531, 2005.
- Neta, P. and Huie, R. E.: Rate constants for reactions of NO<sub>3</sub> radicals in aqueous solutions, *J. Phys. Chem.*, 90, 4644–4648, 1986.
- Orlando, J. J. and Tyndall, G. S.: Rate coefficients for the thermal decomposition of BrONO<sub>2</sub> and the heat of formation of BrONO<sub>2</sub>, *J. Phys. Chem.*, 100, 19 398–19 405, 1996.
- Orlando, J. J., Tyndall, G. S., Bilde, M., Ferronato, C., Wallington, T. J., Vereecken, L., and Peeters, J.: Laboratory and theoretical study of the oxy radicals in the OH- and Cl-initiated oxidation of ethene, *J. Phys. Chem. A*, 102, 8116–8123, 1998.
- Orlando, J. J., Tyndall, G. S., Fracheboud, J. M., Estupinan, E. G., Haberkorn, S., and Zimmer, A.: The rate and mechanism of the gas-phase oxidation of hydroxyacetone, *Atmos. Environ.*, 33, 1621–1629, 1999.
- Orlando, J. J., Tyndall, G. S., Bertman, S. B., Chen, W., and Burkholder, J. B.: Rate coefficient for the reaction of OH with CH<sub>2</sub>=C(CH<sub>3</sub>)C(O)OONO<sub>2</sub> (MPAN), *Atmos. Environ.*, 36, 1895–1900, 2002.

- Pal, B. and Ariya, P. A.: Gas-phase HO-initiated reactions of elemental mercury: Kinetics, product studies, and atmospheric implications, *Environ. Sci. Technol.*, 38, 5555–5566, 2004.
- Palmer, D. A., Ramette, R. W., and Mesmer, R. E.: The hydrolysis of iodine: Equilibria at high temperatures, *J. Nucl. Mater.*, 130, 280–286, 1985.
- Plane, J. M. C., Joseph, D. M., Allan, B. J., Ashworth, S. H., and Francisco, J. S.: An experimental and theoretical study of the reactions  $\text{OIO} + \text{NO}$  and  $\text{OIO} + \text{OH}$ , *J. Phys. Chem. A*, 110, 93–100, 2006.
- Pleijel, K. and Munthe, J.: Modelling the atmospheric mercury cycle — Chemistry in fog droplets, *Atmos. Environ.*, 29, 1441–1457, 1995.
- Ponche, J. L., George, C., and Mirabel, P.: Mass transfer at the air/water interface: Mass accommodation coefficients of  $\text{SO}_2$ ,  $\text{HNO}_3$ ,  $\text{NO}_2$  and  $\text{NH}_3$ , *J. Atmos. Chem.*, 16, 1–21, 1993.
- Pöschl, U., Canagaratna, M., Jayne, J. T., Molina, L. T., Worsnop, D. R., Kolb, C. E., and Molina, M. J.: Mass accommodation coefficient of  $\text{H}_2\text{SO}_4$  vapor on aqueous sulfuric acid surfaces and gaseous diffusion coefficient of  $\text{H}_2\text{SO}_4$  in  $\text{N}_2/\text{H}_2\text{O}$ , *J. Phys. Chem. A*, 102, 10 082–10 089, 1998.
- Raofie, F. and Ariya, P. A.: Kinetics and products study of the reaction of BrO radicals with gaseous mercury, *J. Phys. IV France*, 107, 1119–1121, 2003.
- Raofie, F. and Ariya, P. A.: Product study of the gas-phase BrO-initiated oxidation of  $\text{Hg}^0$ : Evidence for stable  $\text{Hg}^{1+}$  compounds, *Environ. Sci. Technol.*, 38, 4319–4326, 2004.
- Régimbal, J.-M. and Mozurkewich, M.: Peroxynitric acid decay mechanisms and kinetics at low pH, *J. Phys. Chem. A*, 101, 8822–8829, 1997.
- Rickard, A. and Pascoe, S.: The Master Chemical Mechanism (MCM), <http://mcm.leeds.ac.uk>, 2009.
- Ross, A. B., Mallard, W. G., Helman, W. P., Bielski, B. H. J., Buxton, G. V., Cabelli, D. E., Greenstock, C. L., Huie, R. E., and Neta, P.: NDRL-NIST Solution Kinetics Database: - Ver. 1, National Institute of Standards and Technology, Gaithersburg, MD, 1992.
- Rudich, Y., Talukdar, R. K., Imamura, T., Fox, R. W., and Ravishankara, A. R.: Uptake of  $\text{NO}_3$  on KI solutions: Rate coefficient for the  $\text{NO}_3 + \text{I}^-$  reaction and gas-phase diffusion coefficients for  $\text{NO}_3$ , *Chem. Phys. Lett.*, 261, 467–473, 1996.
- Saastad, O. W., Ellermann, T., and Nielsen, C. J.: On the adsorption of NO and  $\text{NO}_2$  on cold  $\text{H}_2\text{O}/\text{H}_2\text{SO}_4$  surfaces, *Geophys. Res. Lett.*, 20, 1191–1193, 1993.
- Sander, S. P., Friedl, R. R., DeMore, W. B., Golden, D. M., Kurylo, M. J., Hampson, R. F., Huie, R. E., Moortgat, G. K., Ravishankara, A. R., Kolb, C. E., and Molina, M. J.: Chemical kinetics and photochemical data for use in stratospheric modeling. Supplement to evaluation 12: Update of key reactions. Evaluation number 13, JPL Publication 00-3, Jet Propulsion Laboratory, Pasadena, CA, <http://jpldataeval.jpl.nasa.gov>, 2000.
- Sander, S. P., Finlayson-Pitts, B. J., Friedl, R. R., Golden, D. M., Huie, R. E., Kolb, C. E., Kurylo, M. J., Molina, M. J., Moortgat, G. K., Orkin, V. L., and Ravishankara, A. R.: Chemical Kinetics and Photochemical Data for Use in Atmospheric Studies, Evaluation Number 14, JPL Publication 02-25, Jet Propulsion Laboratory, Pasadena, CA, 2003.
- Sander, S. P., Friedl, R. R., Golden, D. M., Kurylo, M. J., Moortgat, G. K., Keller-Rudek, H., Wine, P. H., Ravishankara, A. R., Kolb, C. E., Molina, M. J., Finlayson-Pitts, B. J., Huie, R. E., and Orkin, V. L.: Chemical Kinetics and Photochemical Data for Use in Atmospheric Studies, Evaluation Number 15, JPL Publication 06-2, Jet Propulsion Laboratory, Pasadena, CA, 2006.
- Schroeder, W. H. and Munthe, J.: Atmospheric mercury — An overview, *Atmos. Environ.*, 32, 809–822, 1998.
- Schwartz, S. E. and White, W. H.: Solubility equilibria of the nitrogen oxides and oxyacids in dilute aqueous solution, in: *Advances in Environmental Science and Engineering*, edited by Pfafflin, J. R. and Ziegler, E. N., vol. 4, pp. 1–45, Gordon and Breach Science Publishers, NY, 1981.
- Schwarz, H. A. and Bielski, B. H. J.: Reactions of  $\text{HO}_2$  and  $\text{O}_2^-$  with iodine and bromine and the  $\text{I}_2^-$  and  $\text{I}$  atom reduction potentials, *J. Phys. Chem.*, 90, 1445–1448, 1986.
- Schweitzer, F., Mirabel, P., and George, C.: Uptake of hydrogen halides by water droplets, *J. Phys. Chem. A*, 104, 72–76, 2000.
- Sehested, K., Rasmussen, O. L., and Fricke, H.: Rate constants of OH with  $\text{HO}_2$ ,  $\text{O}_2^-$ , and  $\text{H}_2\text{O}_2^+$  from hydrogen peroxide formation in pulse-irradiated oxygenated water, *J. Phys. Chem.*, 72, 626–631, 1968.
- Sehested, K., Holcman, J., and Hart, E. J.: Rate constants and products of the reactions of  $\text{e}_{\text{aq}}^-$ ,  $\text{O}_2^-$  and H with ozone in aqueous solutions, *J. Phys. Chem.*, 87, 1951–1954, 1983.
- Seinfeld, J. H. and Pandis, S. N.: *Atmospheric Chemistry and Physics*, John Wiley & Sons, Inc., 1998.

- Shon, Z.-H., Kim, K.-H., Kim, M.-Y., and Lee, M.: Modeling study of reactive gaseous mercury in the urban air, *Atmos. Environ.*, 39, 749–761, 2005.
- Shoute, L. C. T., Alfassi, Z. B., Neta, P., and Huie, R. E.: Temperature dependence of the rate constants for reaction of dihalide and azide radicals with inorganic reductants, *J. Phys. Chem.*, 95, 3238–3242, 1991.
- Sivakumaran, V., Hölscher, D., Dillon, T. J., and Crowley, J. N.: Reaction between OH and HCHO: temperature dependent rate coefficients (202–399 K) and product pathways (298 K), *Phys. Chem. Chem. Phys.*, 5, 4821–4827, 2003.
- Staudinger, J. and Roberts, P. V.: A critical compilation of Henry’s law constant temperature dependence relations for organic compounds in dilute aqueous solutions, *Chemosphere*, 44, 561–576, 2001.
- Stimpfle, R. M., Wilmouth, D. M., Salawitch, R. J., and Anderson, J. G.: First measurements of ClOOCl in the stratosphere: The coupling of ClOOCl and ClO in the Arctic polar vortex, *J. Geophys. Res.*, 109, doi:10.1029/2003JD003811, 2004.
- Sutton, H. C. and Downes, M. T.: Reactions of the HO<sub>2</sub> radical in aqueous solution with bromine and related compounds, *J. Chem. Soc. Faraday Trans. 1*, 68, 1498–1507, 1972.
- Takami, A., Kato, S., Shimono, A., and Koda, S.: Uptake coefficient of OH radical on aqueous surface, *Chem. Phys.*, 231, 215–227, 1998.
- Taraborrelli, D., Lawrence, M. G., Butler, T. M., Sander, R., and Lelieveld, J.: Mainz Isoprene Mechanism 2 (MIM2): an isoprene oxidation mechanism for regional and global atmospheric modelling, *Atmos. Chem. Phys.*, 9, 2751–2777, <http://www.atmos-chem-phys.net/9/2751>, 2009.
- Thomas, K., Volz-Thomas, A., and Kley, D.: Zur Wechselwirkung von NO<sub>3</sub>-Radikalen mit wässrigen Lösungen: Bestimmung des Henry- und des Masseakkommodationskoeffizienten, Ph.D. thesis, Institut für Chemie und Dynamik der Geosphäre 2, Forschungszentrum Jülich GmbH, Germany, 1993.
- Thornton, J. and Abbatt, J. P. D.: Measurements of HO<sub>2</sub> uptake to aqueous aerosol: Mass accommodation coefficients and net reactive loss, *J. Geophys. Res.*, 110D, doi:10.1029/2004JD005402, 2005.
- Tokos, J. J. S., Hall, B., Calhoun, J. A., and Prestbo, E. M.: Homogeneous gas-phase reaction of Hg<sup>0</sup> with H<sub>2</sub>O<sub>2</sub>, O<sub>3</sub>, CH<sub>3</sub>I, and (CH<sub>3</sub>)<sub>2</sub>S: Implications for atmospheric Hg cycling, *Atmos. Environ.*, 32, 823–827, 1998.
- Troy, R. C. and Margerum, D. W.: Non-metal redox kinetics: Hypobromite and hypobromous acid reactions with iodide and with sulfite and the hydrolysis of bromosulfate, *Inorg. Chem.*, 30, 3538–3543, 1991.
- Troy, R. C., Kelley, M. D., Nagy, J. C., and Margerum, D. W.: Non-metal redox kinetics: Iodine monobromide reaction with iodide ion and the hydrolysis of IBr, *Inorg. Chem.*, 30, 4838–4845, 1991.
- Tyndall, G. S., Staffelbach, T. A., Orlando, J. J., and Calvert, J. G.: Rate coefficients for the reactions of OH radicals with methylglyoxal and acetaldehyde, *Int. J. Chem. Kinetics*, 27, 1009–1020, 1995.
- Tyndall, G. S., Cox, R. A., Granier, C., Lesclaux, R., Moortgat, G. K., Pilling, M. J., Ravishankara, A. R., and Wallington, T. J.: The atmospheric chemistry of small organic peroxy radicals, *J. Geophys. Res.*, 106D, 12 157–12 182, 2001.
- van den Bergh, H. and Troe, J.: Kinetic and thermodynamic properties of INO and INO<sub>2</sub> intermediate complexes in iodine recombination, *J. Chem. Phys.*, 64, 736–742, 1976.
- van Loon, L., Mader, E., and Scott, S. L.: Reduction of the aqueous mercuric ion by sulfite: UV spectrum of HgSO<sub>3</sub> and its intramolecular redox reaction, *J. Phys. Chem. A*, 104, 1621–1626, 2000.
- van Loon, L. L., Mader, E. A., and Scott, S. L.: Sulfite stabilization and reduction of the aqueous mercuric ion: Kinetic determination of sequential formation constants, *J. Phys. Chem. A*, 105, 3190–3195, 2001.
- Vogt, R., Crutzen, P. J., and Sander, R.: A mechanism for halogen release from sea-salt aerosol in the remote marine boundary layer, *Nature*, 383, 327–330, doi:10.1038/383327A0, 1996.
- von Glasow, R., Sander, R., Bott, A., and Crutzen, P. J.: Modeling halogen chemistry in the marine boundary layer, 1. Cloud-free MBL, *J. Geophys. Res.*, 107D, 4341, doi:10.1029/2001JD000942, 2002.
- von Kuhlmann, R.: Tropospheric photochemistry of ozone, its precursors and the hydroxyl radical: A 3D-modeling study considering non-methane hydrocarbons, Ph.D. thesis, Johannes Gutenberg-Universität, Mainz, Germany, 2001.
- von Kuhlmann, R., Lawrence, M. G., Crutzen, P. J., and Rasch, P. J.: A model for studies of tropospheric ozone and nonmethane hydrocarbons: Model description and ozone results, *J. Geophys. Res.*, 108D, doi:10.1029/2002JD002893, 2003.
- Wagman, D. D., Evans, W. H., Parker, V. B., Schumm, R. H., Halow, I., Bailey, S. M., Churney, K. L., and Nuttall, R. L.: The NBS tables of chemical thermodynamic properties; Selected values for inorganic and



- C<sub>1</sub> and C<sub>2</sub> organic substances in SI units, *J. Phys. Chem. Ref. Data*, 11, suppl. 2, 1982.
- Wagner, I. and Strehlow, H.: On the flash photolysis of bromide ions in aqueous solution, *Ber. Bunsenges. Phys. Chem.*, 91, 1317–1321, 1987.
- Wang, T. X. and Margerum, D. W.: Kinetics of reversible chlorine hydrolysis: Temperature dependence and general-acid/base-assisted mechanisms, *Inorg. Chem.*, 33, 1050–1055, 1994.
- Wang, T. X., Kelley, M. D., Cooper, J. N., Beckwith, R. C., and Margerum, D. W.: Equilibrium, kinetic, and UV-spectral characteristics of aqueous bromine chloride, bromine, and chlorine species, *Inorg. Chem.*, 33, 5872–5878, 1994.
- Wang, Y. L., Nagy, J. C., and Margerum, D. W.: Kinetics of hydrolysis of iodine monochloride measured by the pulsed-accelerated-flow method, *J. Am. Chem. Soc.*, 111, 7838–7844, 1989.
- Wang, Z. and Pehkonen, S. O.: Oxidation of elemental mercury by aqueous bromine: atmospheric implications, *Atmos. Environ.*, 38, 3675–3688, 2004.
- Warneck, P.: Chemical reactions in clouds, *Fresenius J. Anal. Chem.*, 340, 585–590, 1991.
- Warneck, P.: The relative importance of various pathways for the oxidation of sulfur dioxide and nitrogen dioxide in sunlit continental fair weather clouds, *Phys. Chem. Chem. Phys.*, 1, 5471–5483, 1999.
- Wayne, R. P., Barnes, I., Biggs, P., Burrows, J. P., Canosa-Mas, C. E., Hjorth, J., Le Bras, G., Moortgat, G. K., Perner, D., Poulet, G., Restelli, G., and Sidebottom, H.: The nitrate radical: Physics, chemistry, and the atmosphere, *Atmos. Environ.*, 25A, 1–203, 1991.
- Weast, R. C., ed.: *CRC Handbook of Chemistry and Physics*, 61st Edition, CRC Press, Inc., Boca Raton, FL, 1980.
- Weinstein-Lloyd, J. and Schwartz, S. E.: Low-intensity radiolysis study of free-radical reactions in cloudwater: H<sub>2</sub>O<sub>2</sub> production and destruction, *Environ. Sci. Technol.*, 25, 791–800, 1991.
- Wilhelm, E., Battino, R., and Wilcock, R. J.: Low-pressure solubility of gases in liquid water, *Chem. Rev.*, 77, 219–262, 1977.
- Wine, P. H., Tang, Y., Thorn, R. P., Wells, J. R., and Davis, D. D.: Kinetics of aqueous phase reactions of the SO<sub>4</sub><sup>-</sup> radical with potential importance in cloud chemistry, *J. Geophys. Res.*, 94D, 1085–1094, 1989.
- Wingenter, O. W., Sive, B. C., Blake, N. J., and Rowland, F. S.: Atomic chlorine concentrations determined from ethane and hydroxyl measurements made over the Central Pacific Ocean, *Eos, Trans. AGU (Abstract Supplement)*, 80, F149–F150, 1999.
- Worsnop, D. R., Zahniser, M. S., Kolb, C. E., Gardner, J. A., Watson, L. R., van Doren, J. M., Jayne, J. T., and Davidovits, P.: The temperature dependence of mass accommodation of SO<sub>2</sub> and H<sub>2</sub>O<sub>2</sub> on aqueous surfaces, *J. Phys. Chem.*, 93, 1159–1172, 1989.
- Wu, D., Wong, D., and Di Bartolo, B.: Evolution of Cl<sub>2</sub><sup>-</sup> in aqueous NaCl solutions, *J. Photochem.*, 14, 303–310, 1980.
- Yiin, B. S. and Margerum, D. W.: Nonmetal redox kinetics: reactions of iodine and triiodide with sulfite and hydrogen sulfite and the hydrolysis of iodofate, *Inorg. Chem.*, 29, 1559–1564, 1990.
- Yu, X.-Y.: Critical evaluation of rate constants and equilibrium constants of hydrogen peroxide photolysis in acidic aqueous solutions containing chloride ions, *J. Phys. Chem. Ref. Data*, 33, 747–763, 2004.
- Zaveri, R. A. and Peters, L. K.: A new lumped structure photochemical mechanism for large-scale applications, *J. Geophys. Res.*, 104D, 30 387–30 415, 1999.
- Zehavi, D. and Rabani, J.: The oxidation of aqueous bromide by hydroxyl radicals. A pulse radiolytic investigation, *J. Phys. Chem.*, 76, 312–319, 1972.
