# Supplementary figures and images for: The atmospheric chemistry box model CAABA/MECCA-3.0
Source: Copernicus journal article supplement (doi:10.5194/gmd-4-373-2011), 2011-05-06

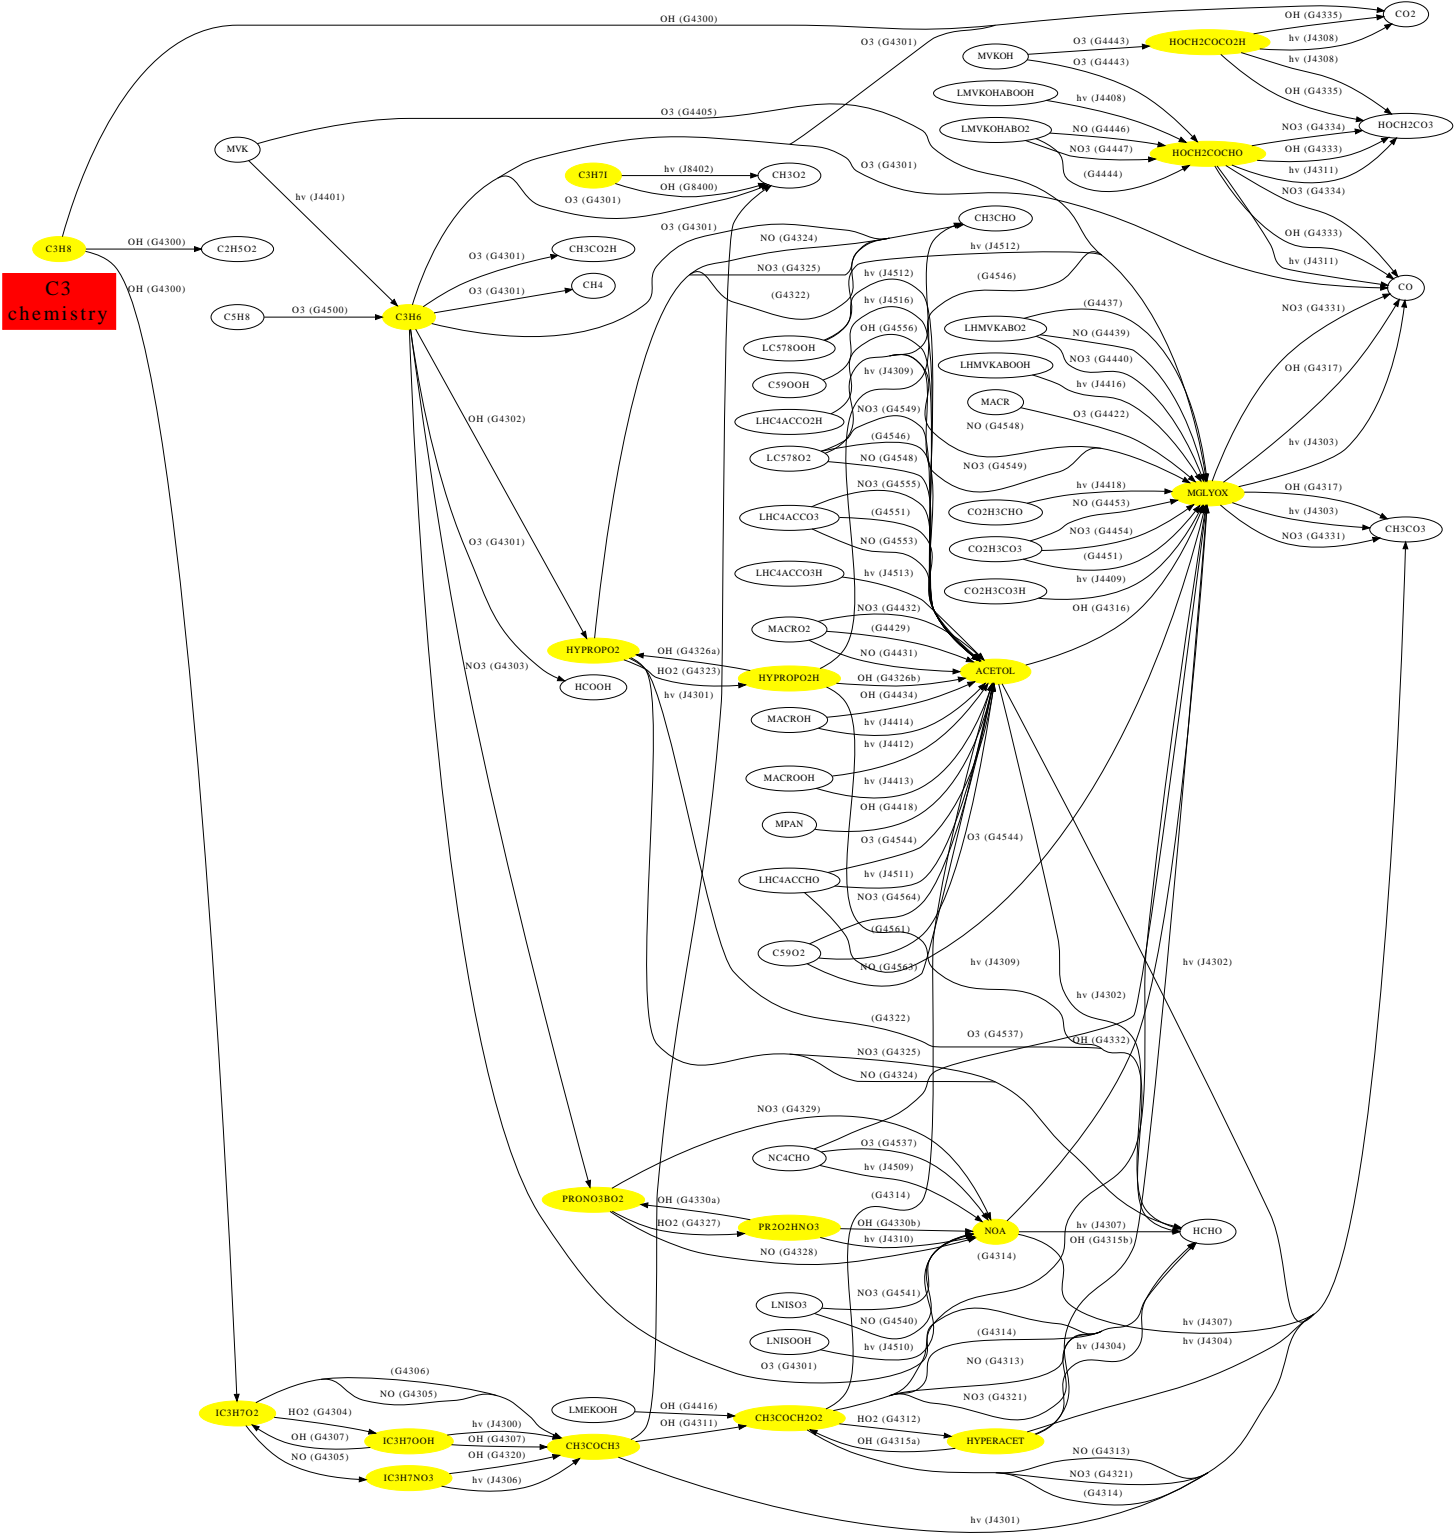

Supplement: Supplementary file 1 [file gmd-4-373-2011-supplement.zip]

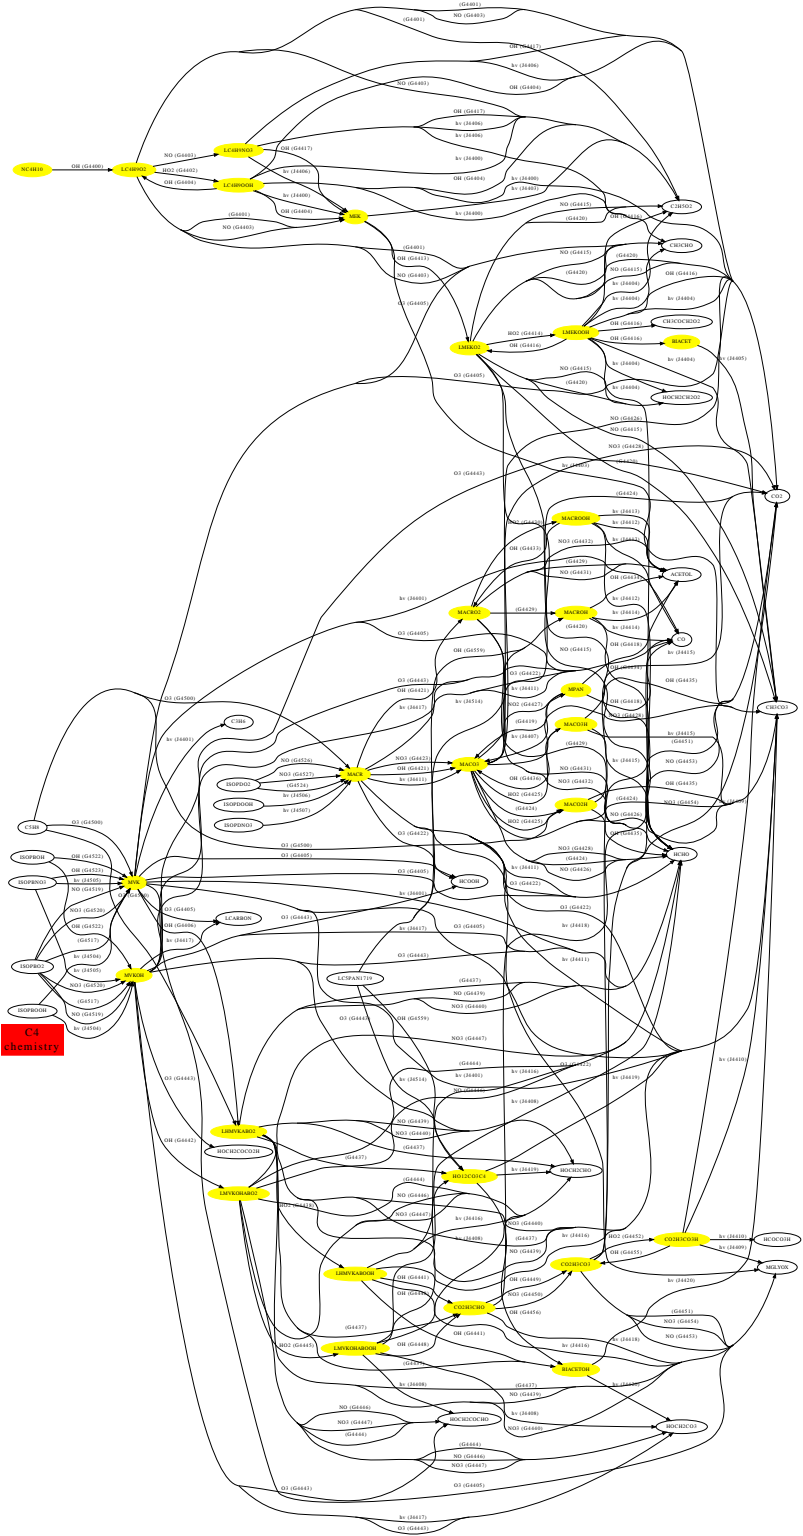

Supplement: Supplementary file 2 [file gmd-4-373-2011-supplement.zip]

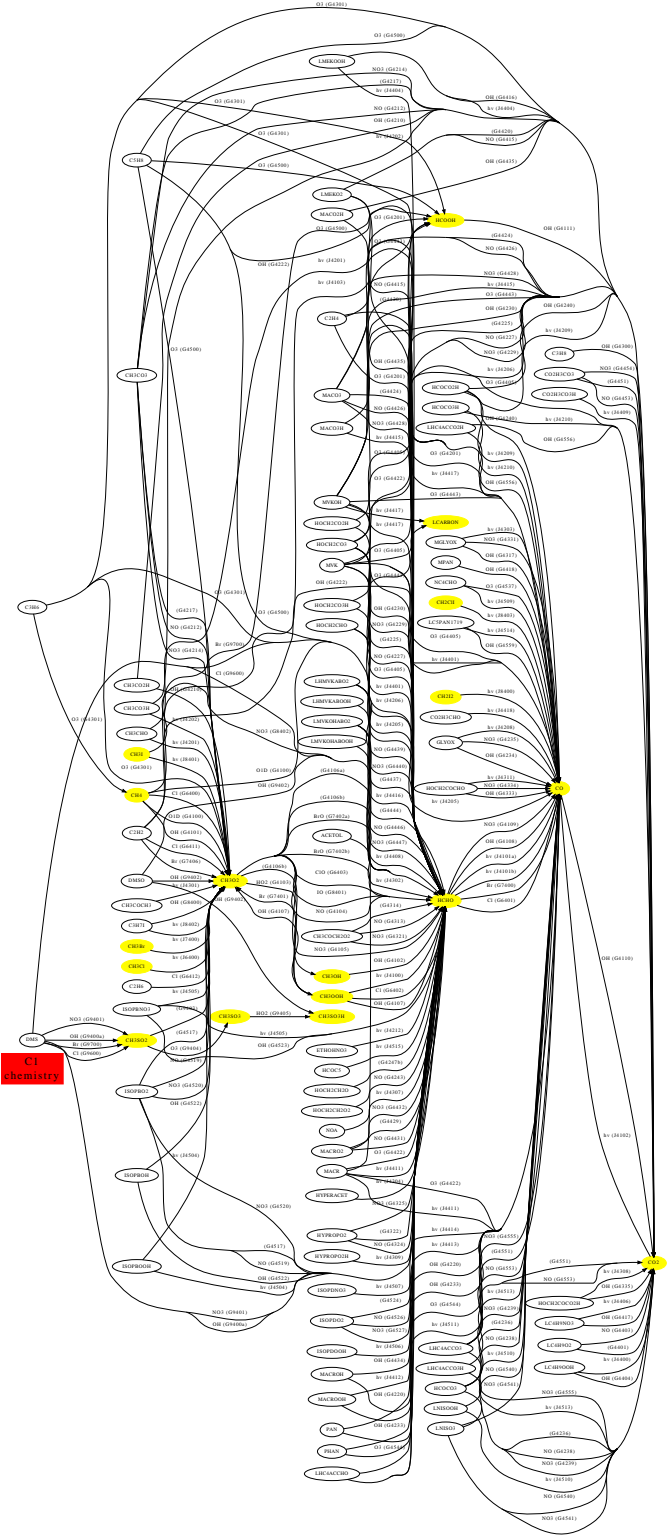

Supplement: Supplementary file 3 [file gmd-4-373-2011-supplement.zip]

X : 0.5 to 402.8

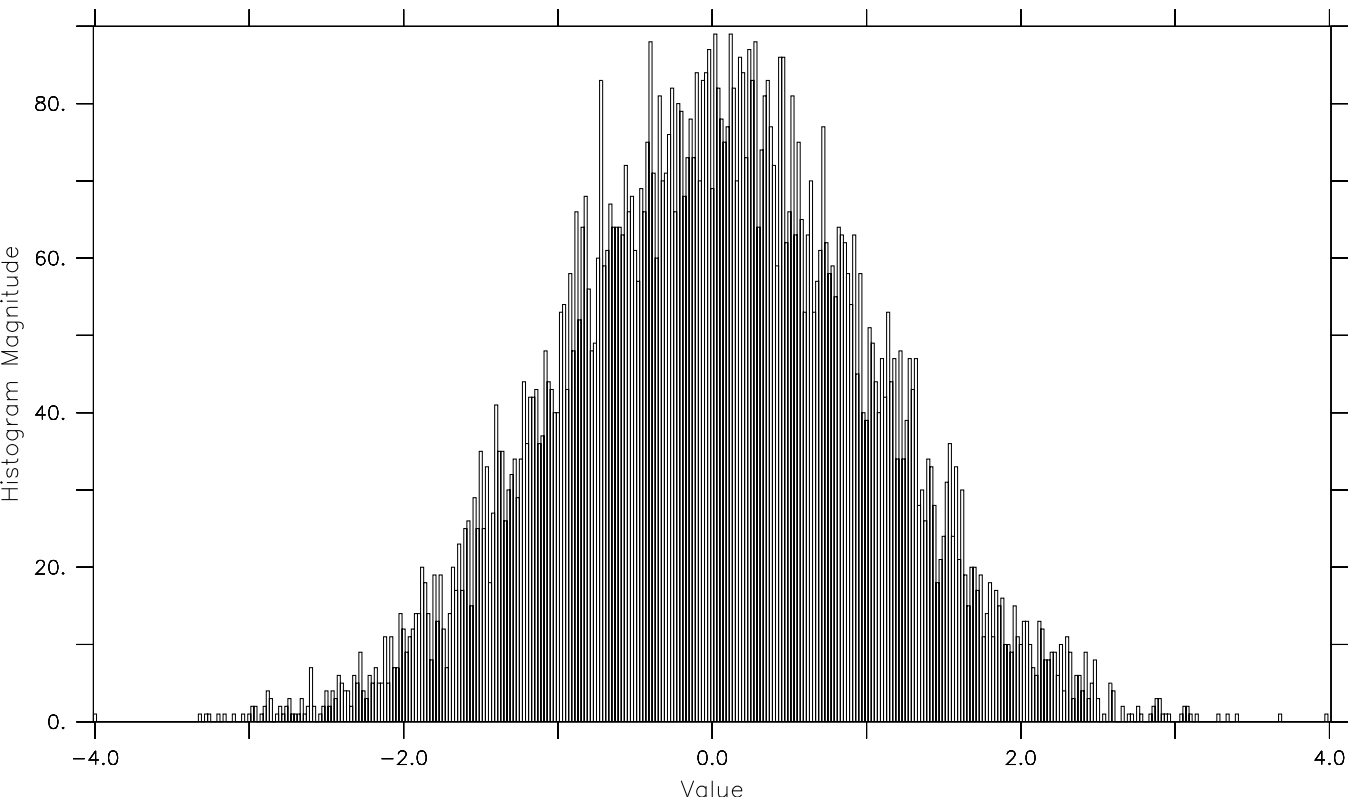

Supplement: Supplementary file 4 [file gmd-4-373-2011-supplement.zip]

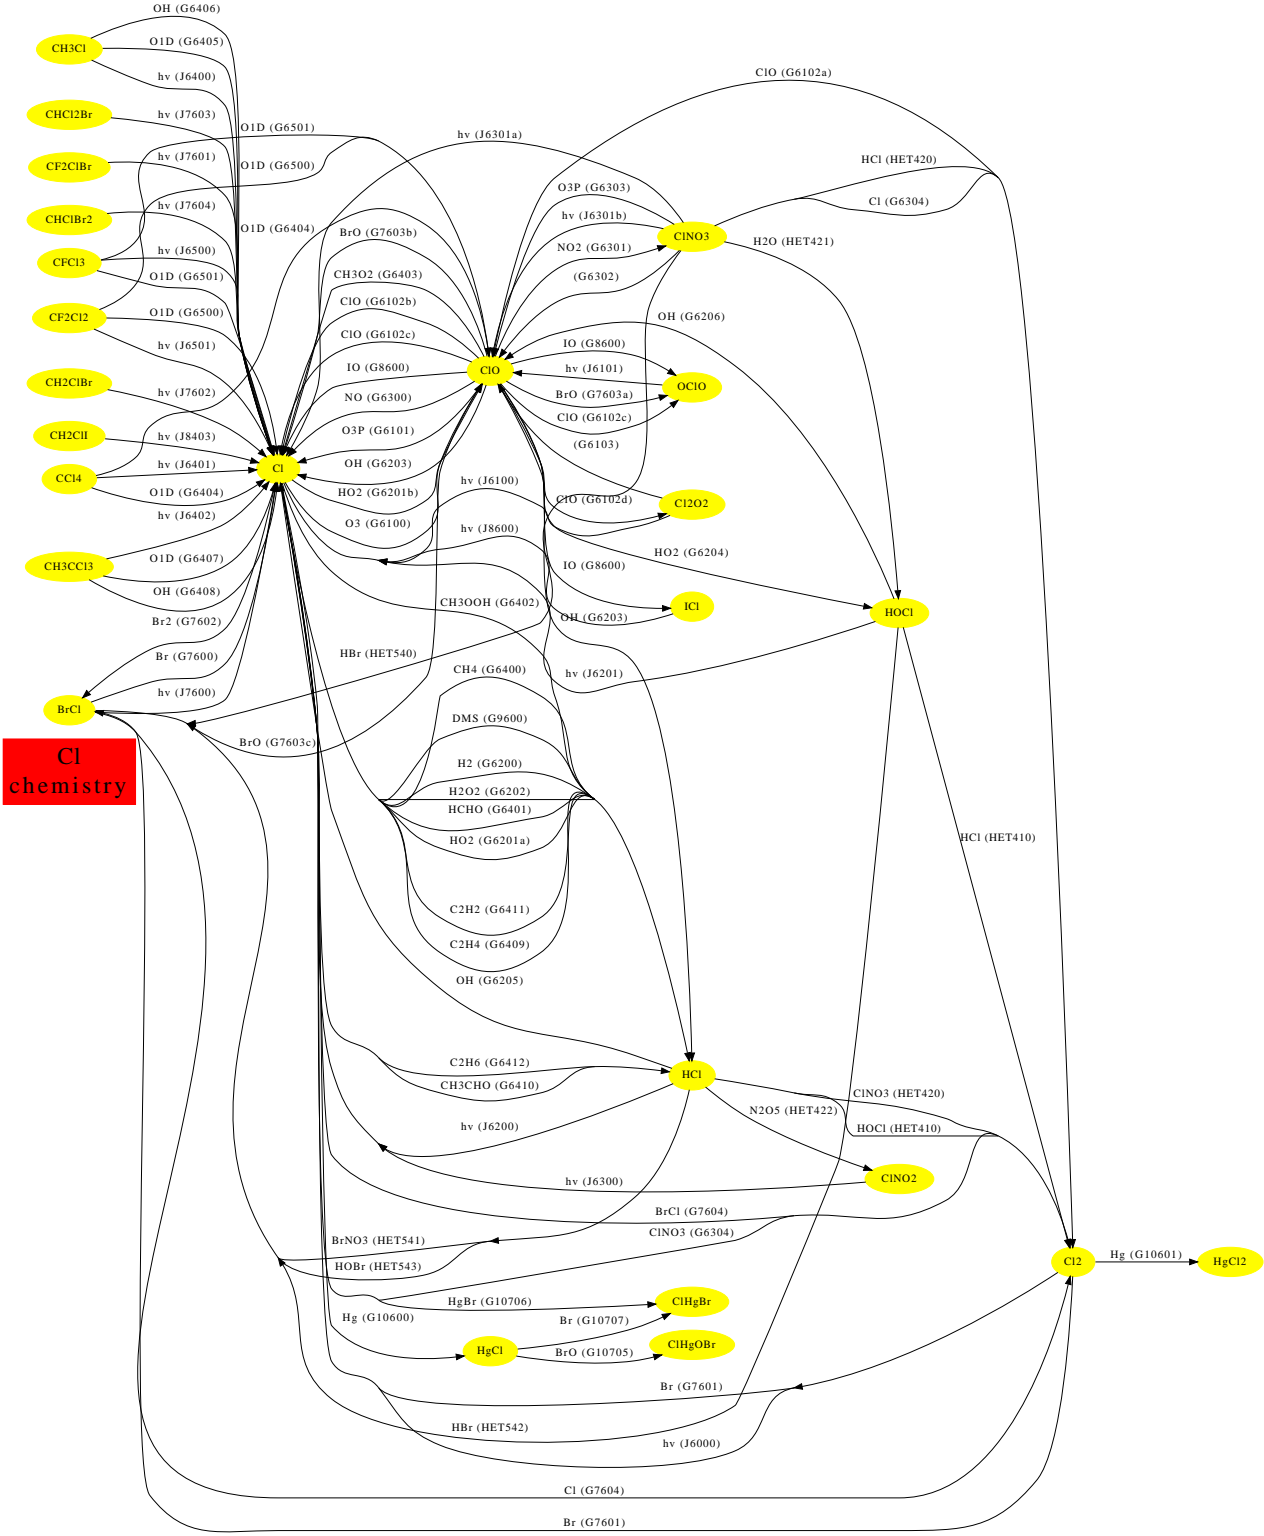

Supplement: Supplementary file 5 [file gmd-4-373-2011-supplement.zip]

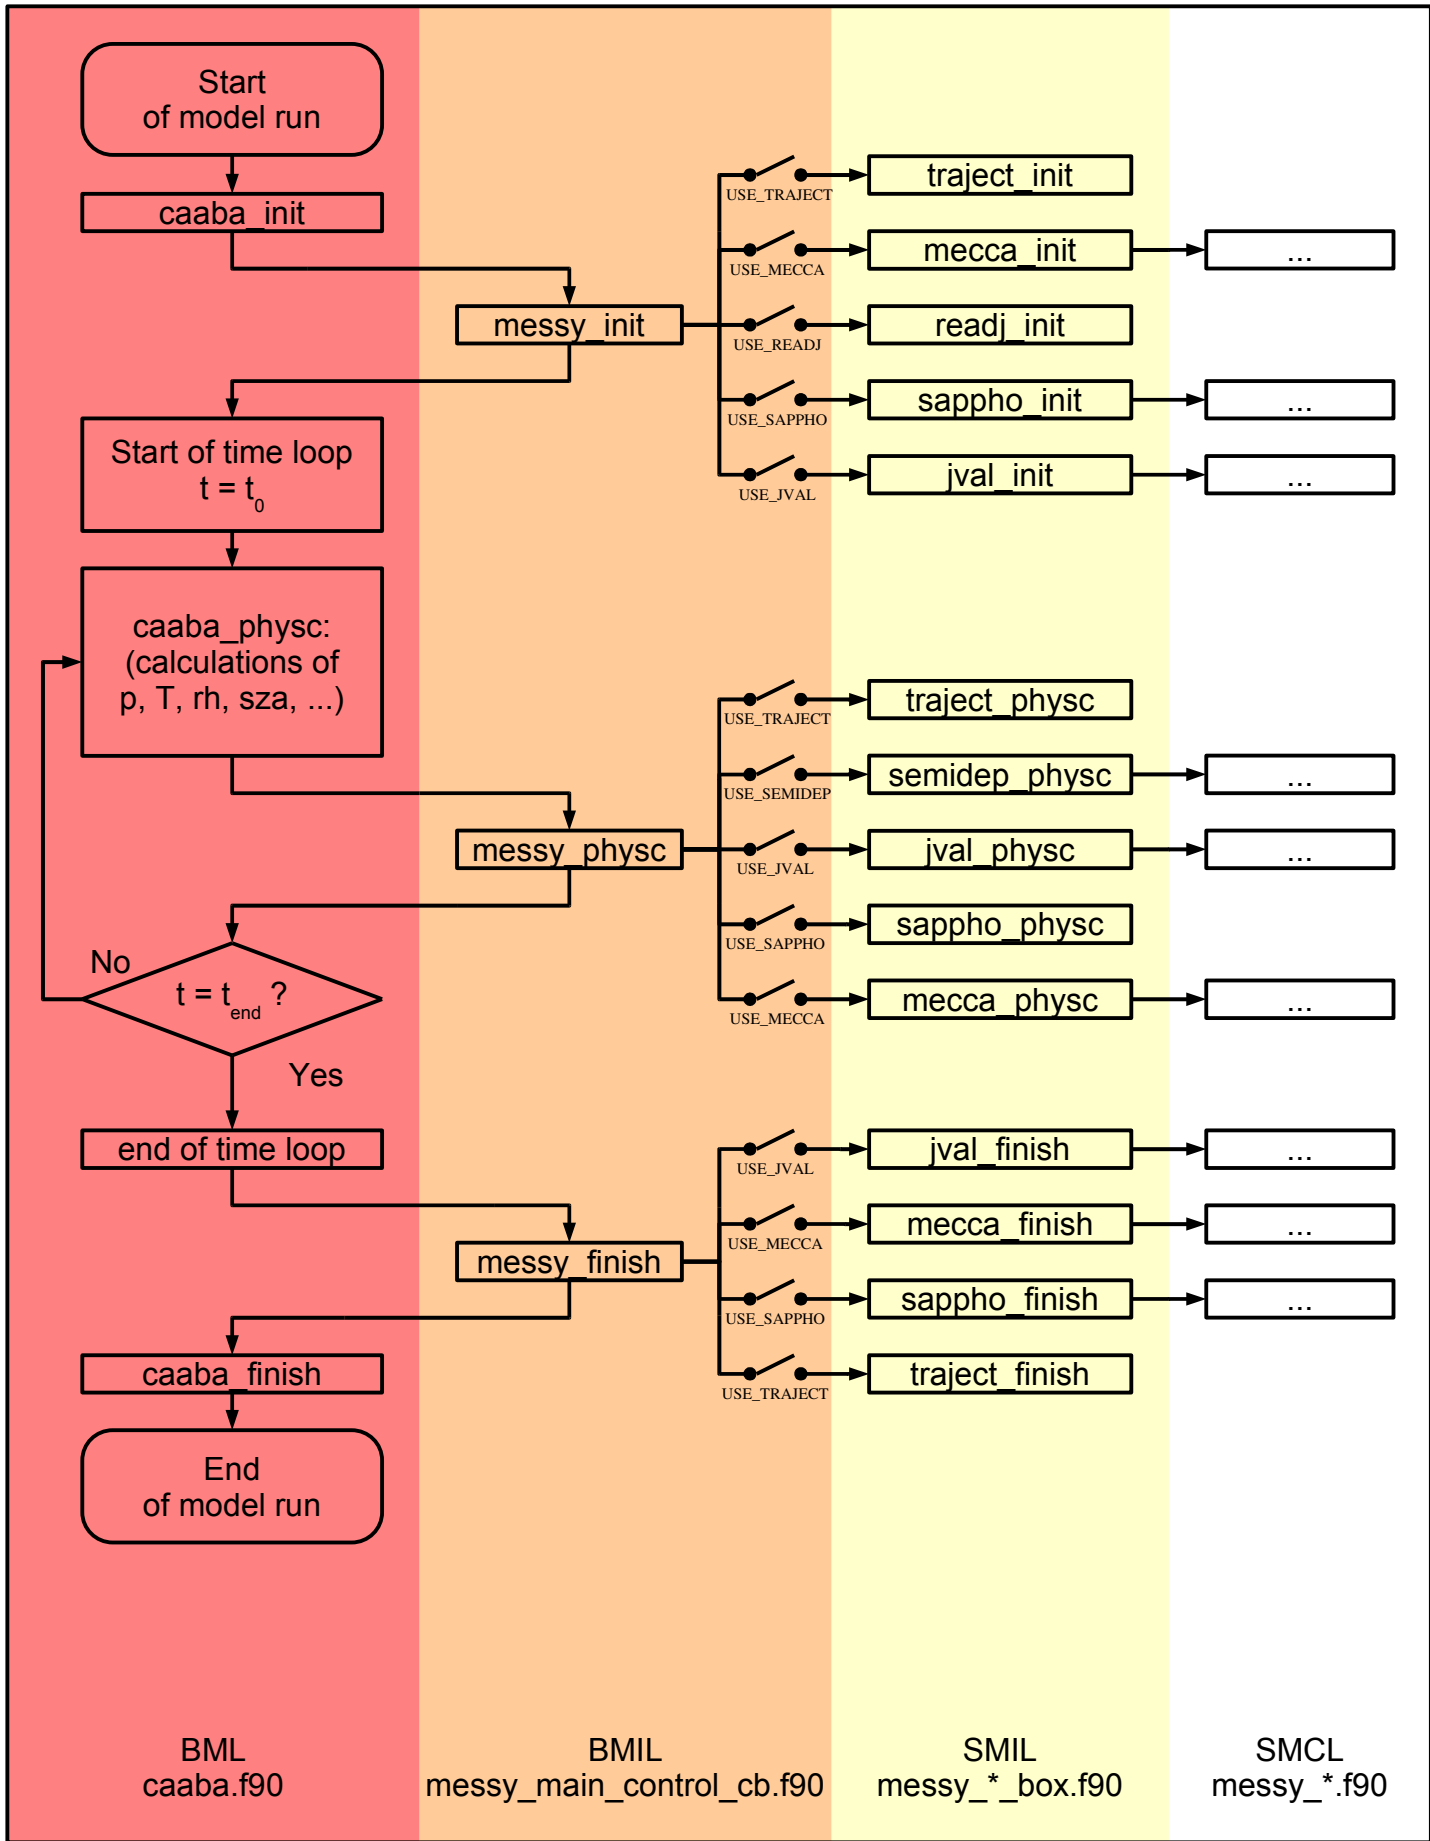

Supplement: Supplementary file 6 [file gmd-4-373-2011-supplement.zip]

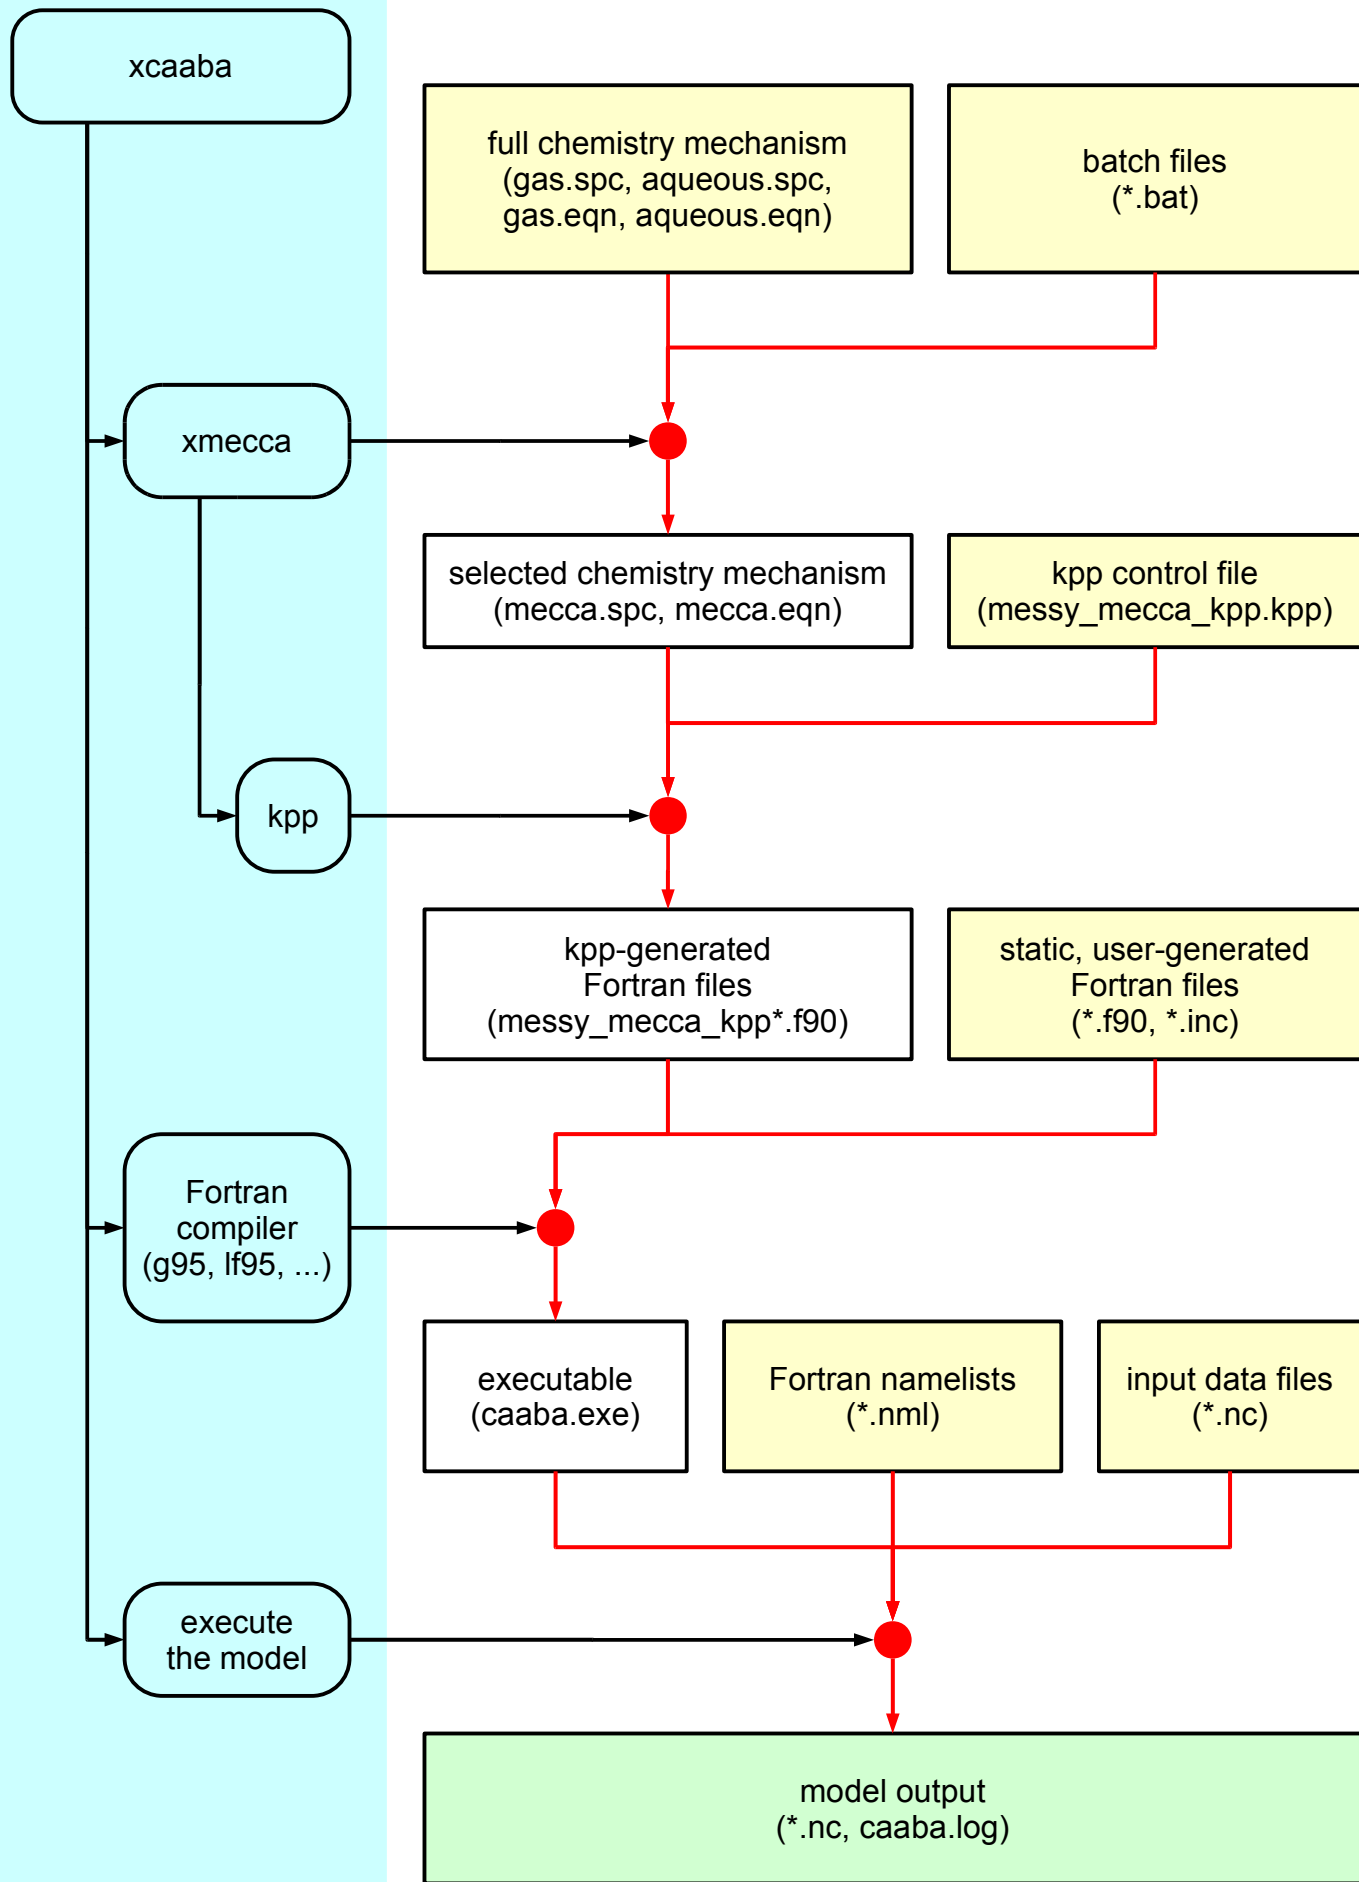

Supplement: Supplementary file 8 [file gmd-4-373-2011-supplement.zip]

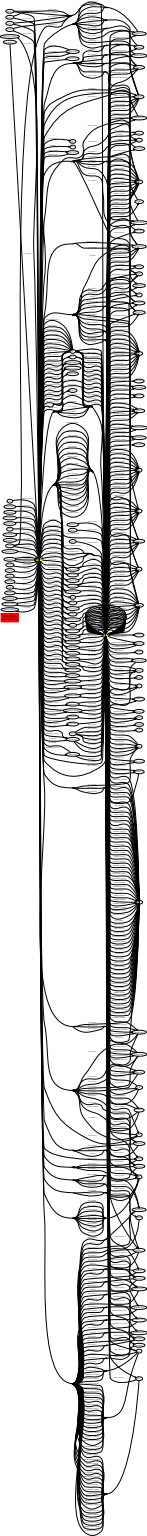

Supplement: Supplementary file 9 [file gmd-4-373-2011-supplement.zip › caaba_3.0/mecca/graphviz/OH_HO2.pdf]

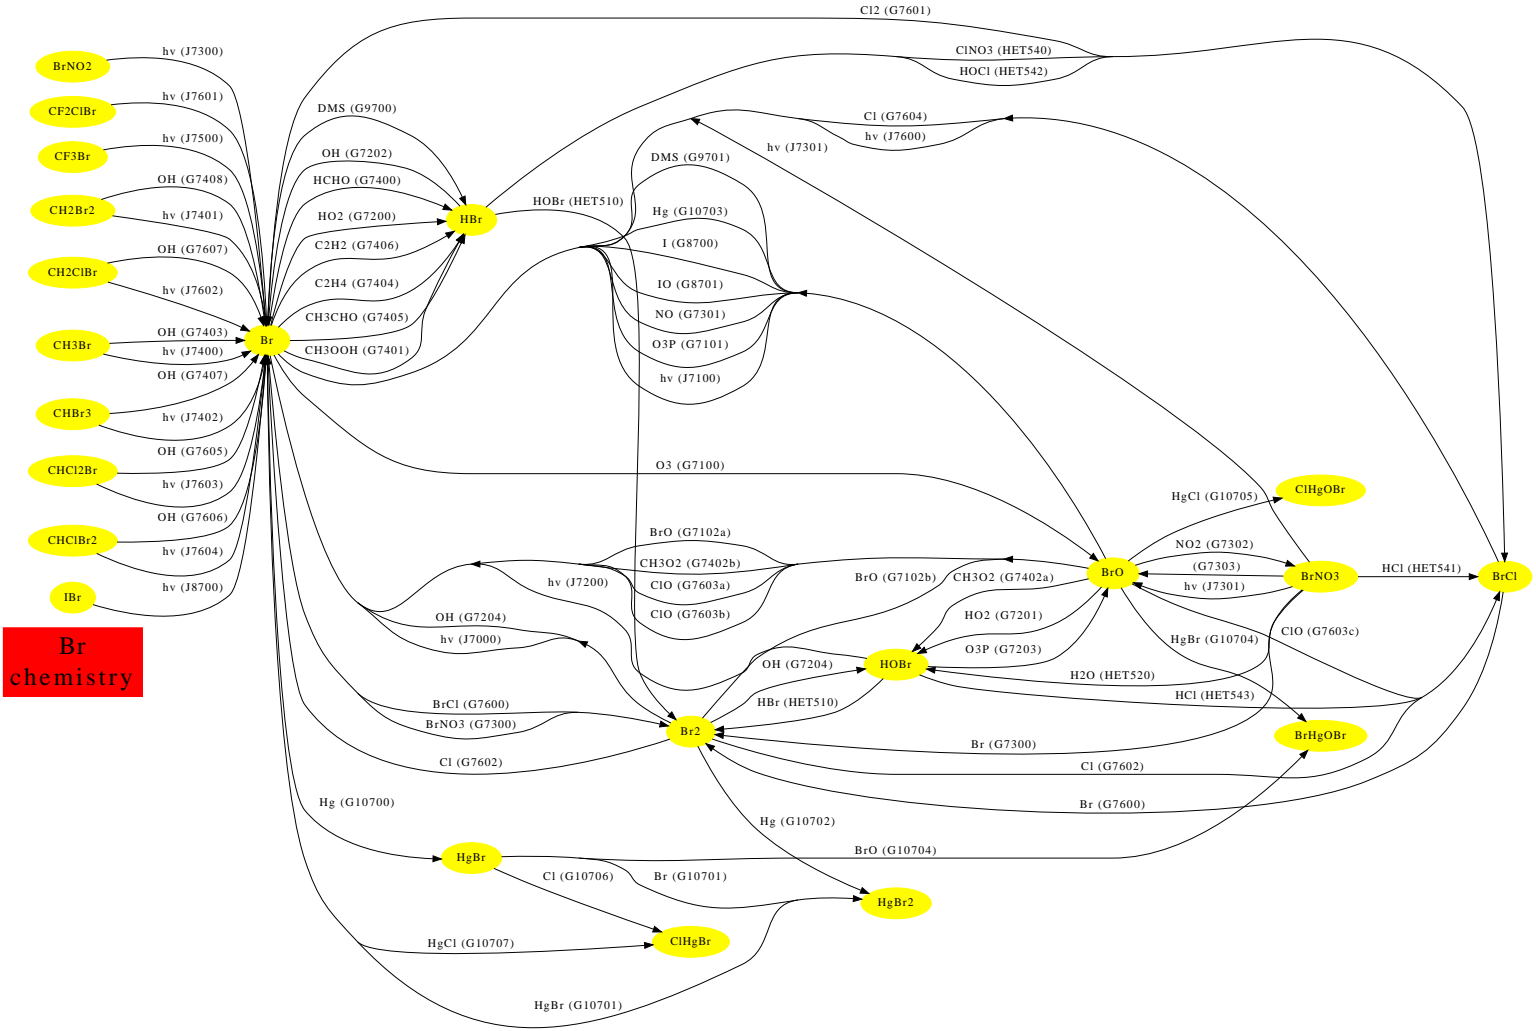

Supplement: Supplementary file 9 [file gmd-4-373-2011-supplement.zip › caaba_3.0/mecca/graphviz/Br.pdf]

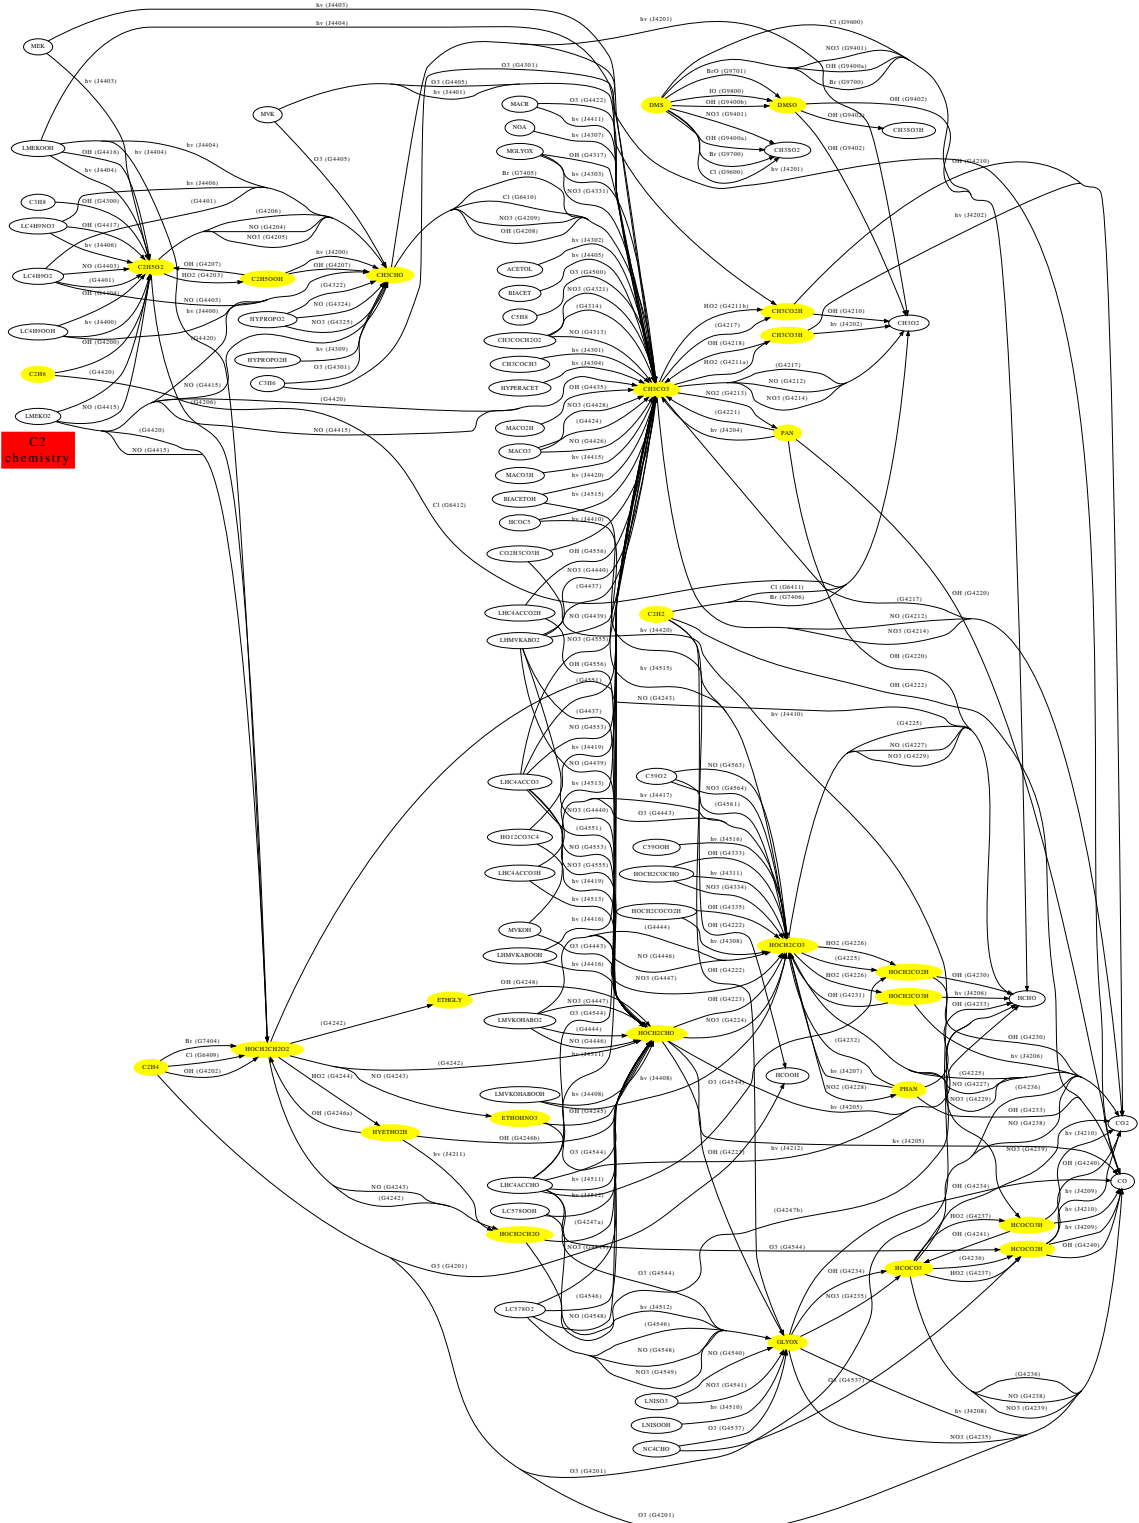

Supplement: Supplementary file 9 [file gmd-4-373-2011-supplement.zip › caaba_3.0/mecca/graphviz/C2.pdf]

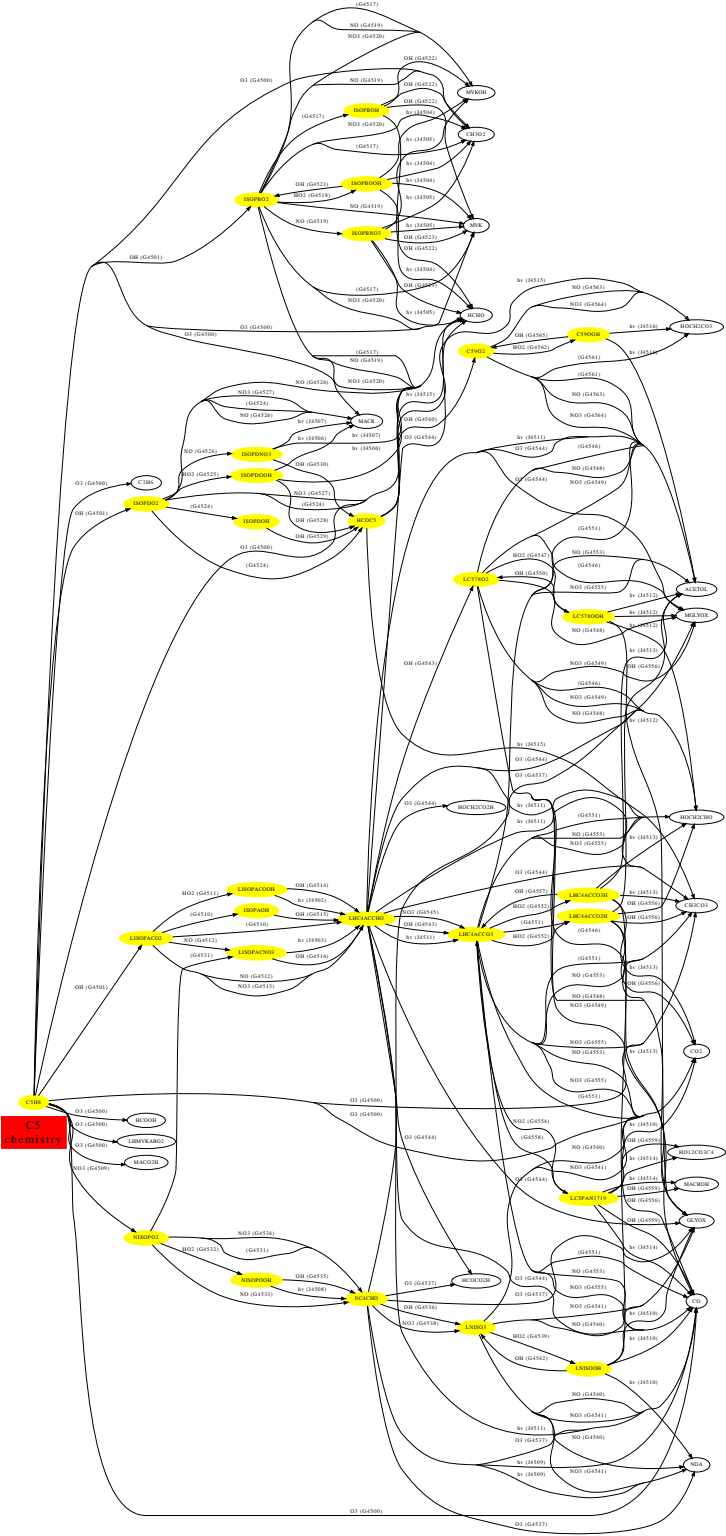

Supplement: Supplementary file 9 [file gmd-4-373-2011-supplement.zip › caaba_3.0/mecca/graphviz/C5.pdf]

# I chemistry

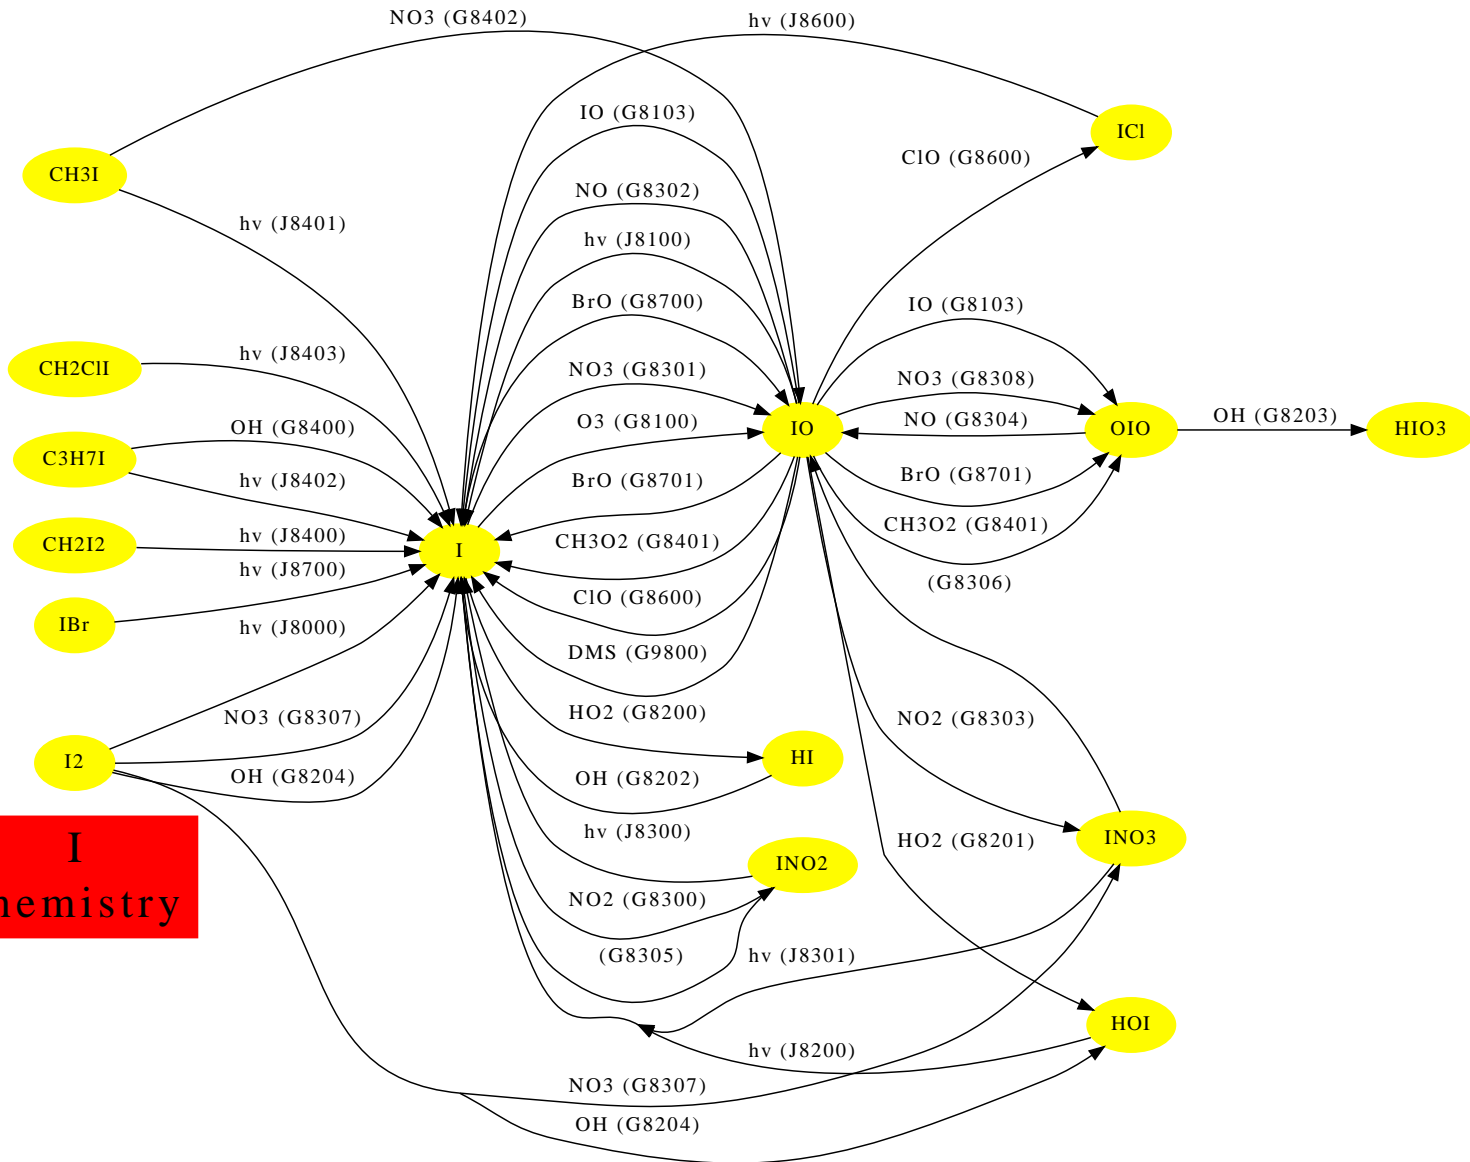

Supplement: Supplementary file 9 [file gmd-4-373-2011-supplement.zip › caaba_3.0/mecca/graphviz/I.pdf]

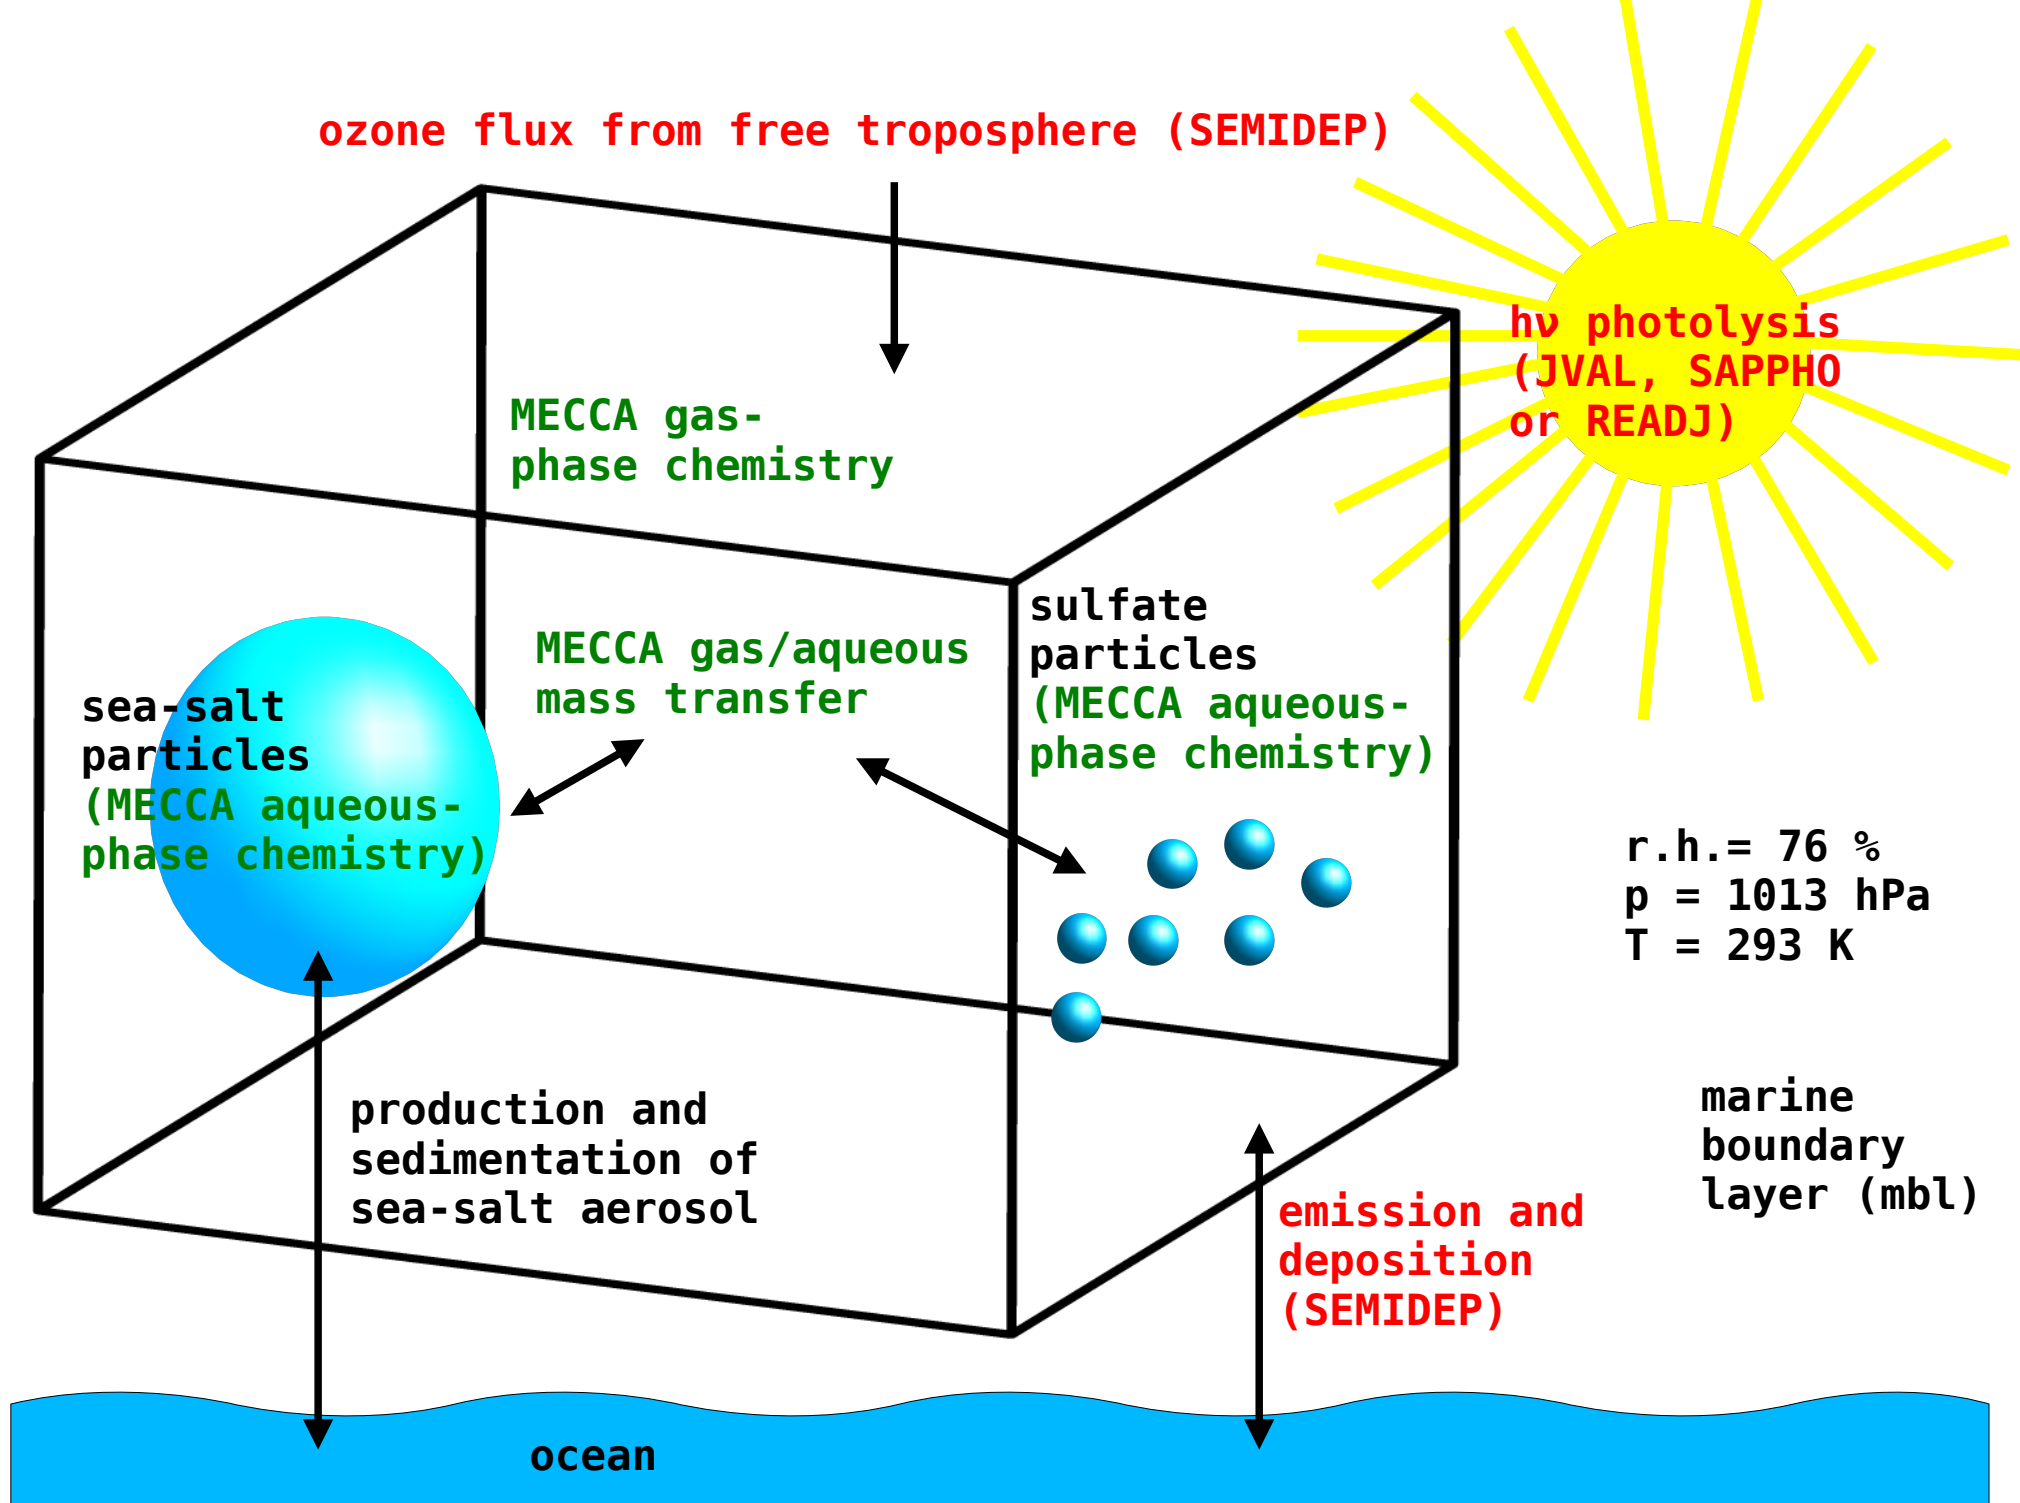

Supplement: Supplementary file 11 [file gmd-4-373-2011-supplement.zip]

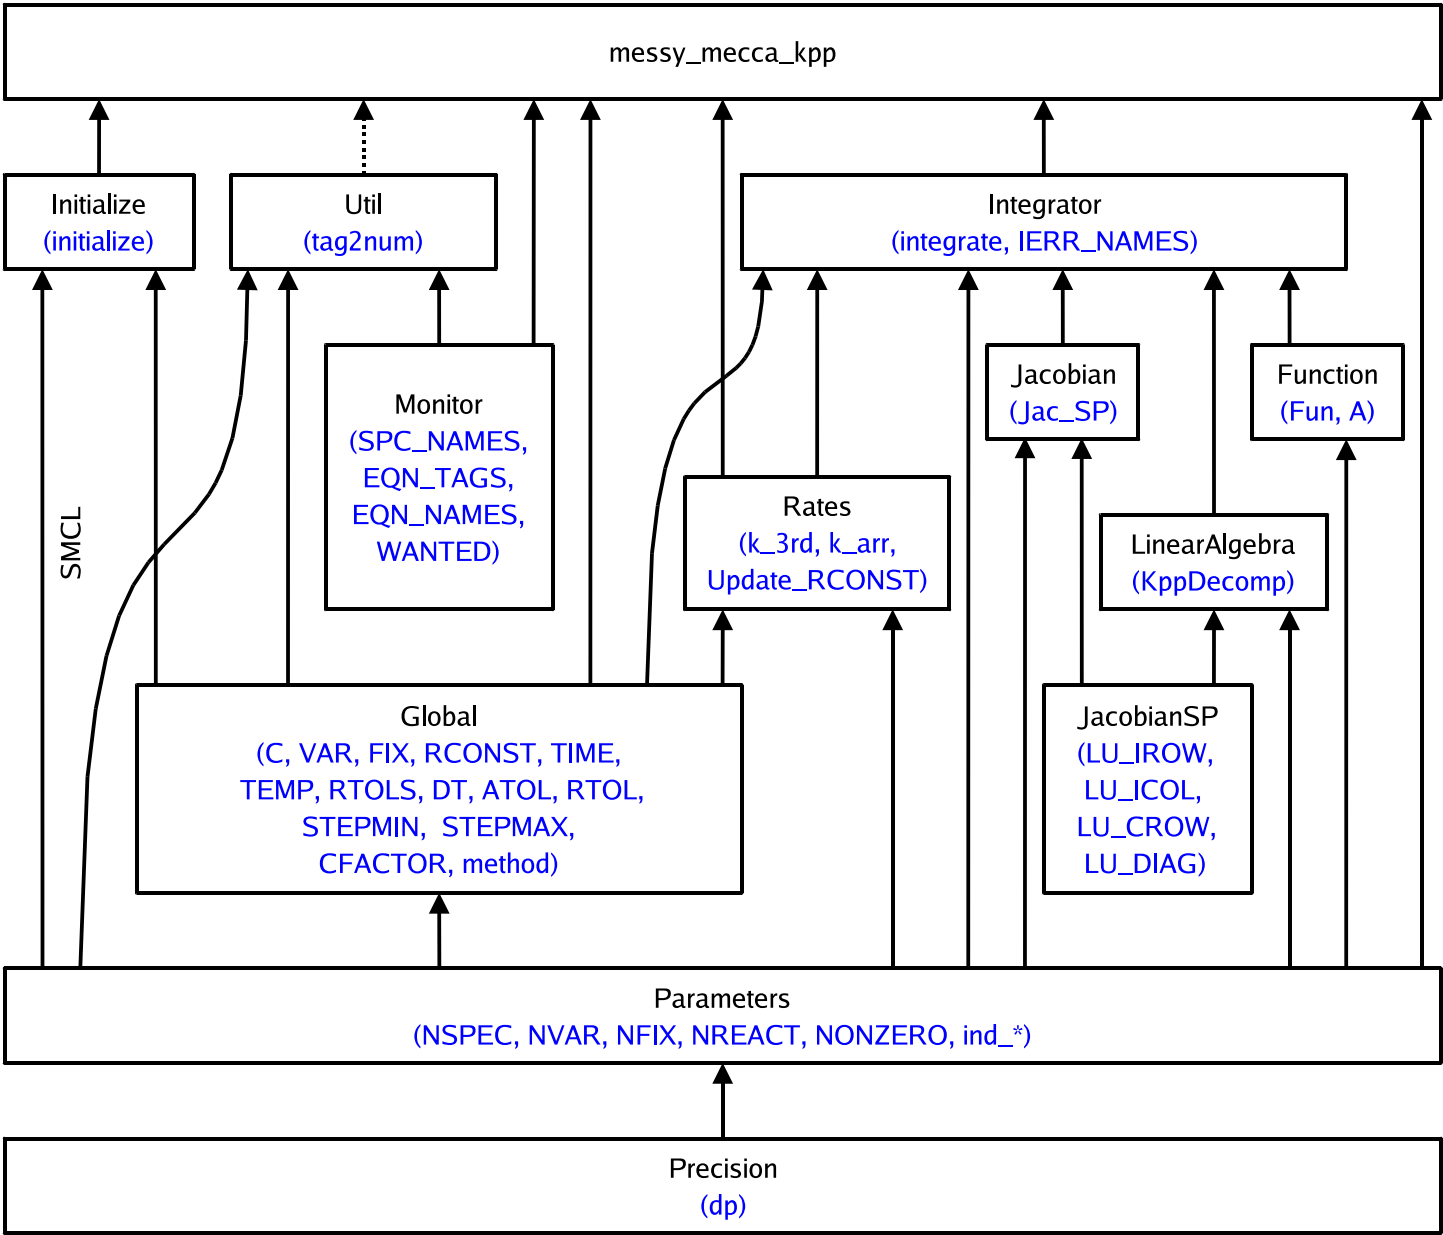

Supplement: Supplementary file 12 [file gmd-4-373-2011-supplement.zip]

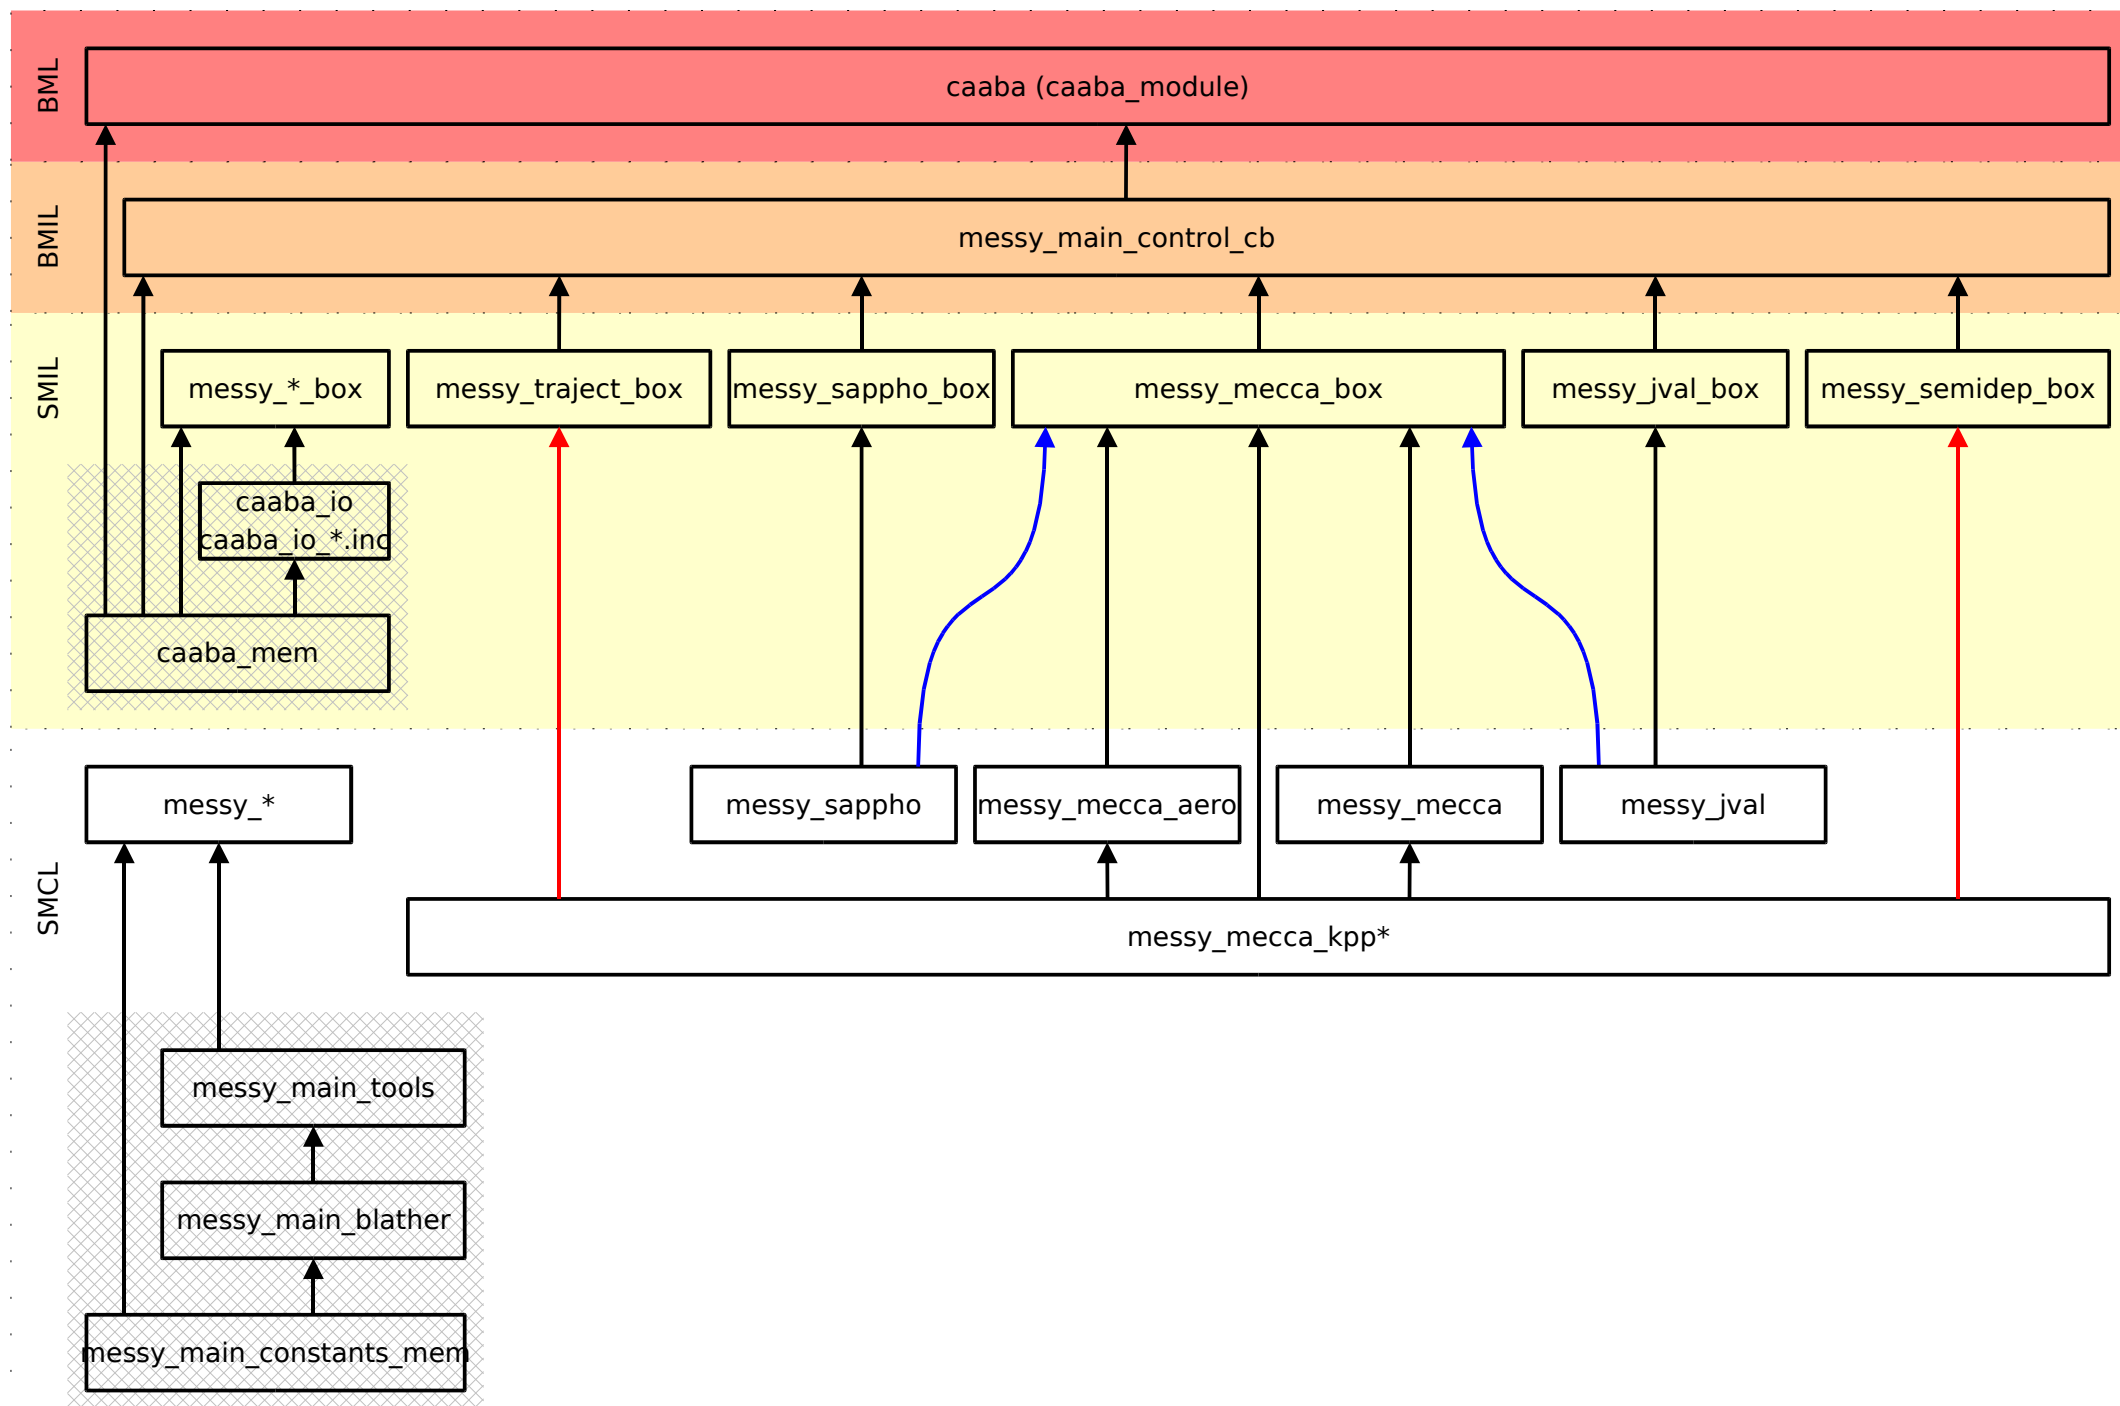

Supplement: Supplementary file 16 [file gmd-4-373-2011-supplement.zip]

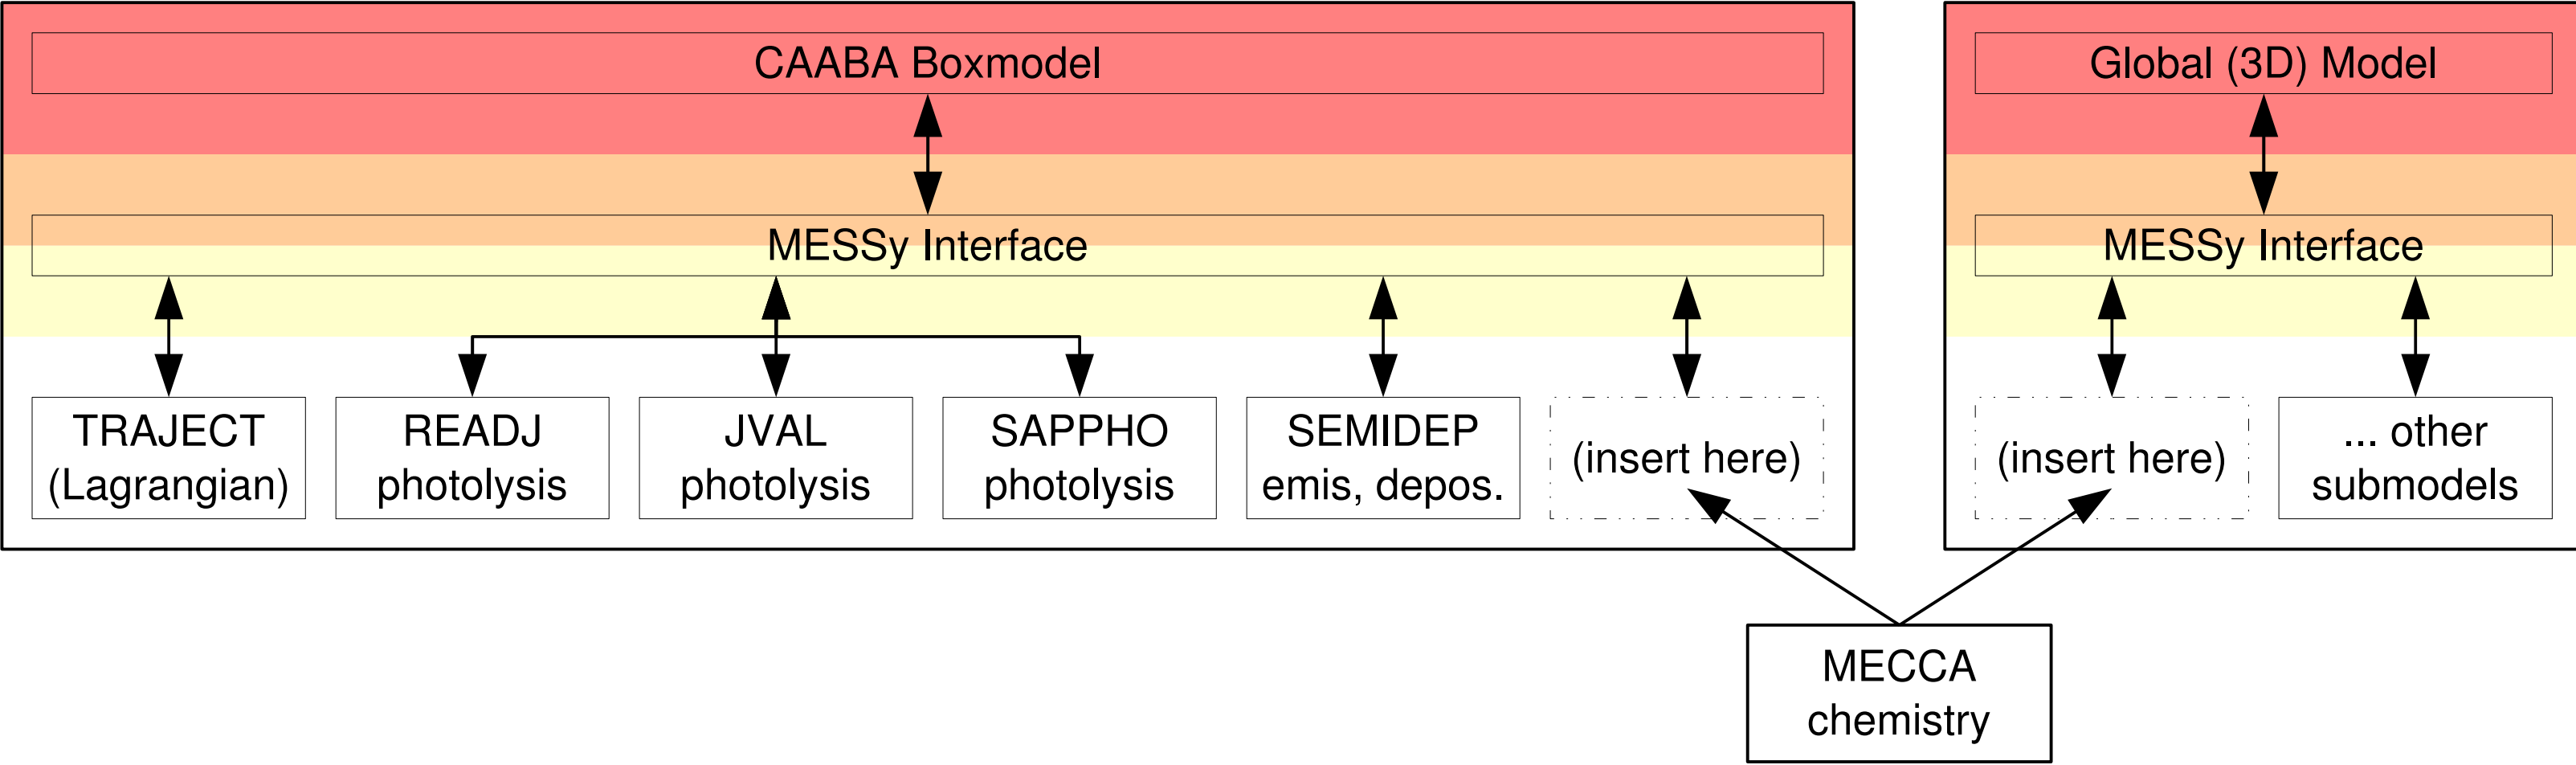

Supplement: Supplementary file 19 [file gmd-4-373-2011-supplement.zip]
